# Supplementary material for: Re-expression of SMARCA4/BRG1 in small cell carcinoma of ovary, hypercalcemic type (SCCOHT) promotes an epithelial-like gene signature through an AP-1-dependent mechanism
Source: eLife. 2020 Dec 23;9:e59073. doi: 10.7554/eLife.59073 (PMC7813545; doi:10.7554/eLife.59073)
Supplement: Figure 1—source data 1. [file elife-59073-fig1-data1.xlsx]

## Sheet: README
Orlando et al. eLife
Figure 1: Source Data File 1
A = Figure 1C Volcano Plot BIN67 +/- BRG1 RNA-seq
B = Figure 1D Volcano Plot BIN67 +/- BRG1 Proteomics
C = Figure 1E Volcano Plot BIN67 +/- BRG1 ATAC-seq

## Sheet: A- BIN67_RNAseq
baseMean	log2FoldChange	lfcSE	stat	pvalue	padj	Gene	Significance
691.422	-0.636497	0.216279	-2.94294	0.00325107	0.00958874	A1BG	padj<0.05 & Downregulated
4.88097	-0.02678	0.8501	-0.0315021	0.974869	0.984584	A1CF	N.S.
42.7744	0.516563	0.533717	0.96786	0.333114	0.462487	A2M	N.S.
195.436	-1.86409	0.365222	-5.10399	3.32561e-07	2.06368e-06	A2ML1	padj<0.05 & Downregulated
0.115843	0.776761	3.53381	0.219808	0.826021	NA	A3GALT2	N.S.
2066.41	0.11549	0.137891	0.83755	0.402283	0.531191	A4GALT	N.S.
1.9748	-0.336079	1.18141	-0.284474	0.776047	0.848158	A4GNT	N.S.
2999.26	-0.296394	0.118704	-2.49691	0.012528	0.0314029	AAAS	padj<0.05 & Downregulated
3861.16	0.109844	0.0916982	1.19789	0.230961	0.348894	AACS	N.S.
28.3064	8.29014	1.1236	7.37821	1.60431e-13	1.93528e-12	AADAC	padj<0.05 & Upregulated
0	NA	NA	NA	NA	NA	AADACL2	N.S.
20.3799	7.07653	1.22719	5.76647	8.09478e-09	6.2186e-08	AADACL3	padj<0.05 & Upregulated
0	NA	NA	NA	NA	NA	AADACL4	N.S.
832.38	0.0404345	0.0988281	0.40914	0.682437	0.776067	AADAT	N.S.
1849.73	-0.227139	0.111363	-2.03962	0.0413877	0.0865646	AAED1	N.S.
6529.75	0.0295483	0.105422	0.280285	0.779259	0.850495	AAGAB	N.S.
4602.38	0.511294	0.115031	4.44484	8.79572e-06	4.41966e-05	AAK1	padj<0.05 & Upregulated
1095.4	0.141144	0.142968	0.987238	0.323526	0.452236	AAMDC	N.S.
9302.75	0.24091	0.10084	2.38903	0.016893	0.0404646	AAMP	padj<0.05 & Upregulated
12.5738	0.531239	0.618655	0.8587	0.390506	0.520247	AANAT	N.S.
2344.25	-0.0186914	0.0792022	-0.235995	0.813436	0.8746	AAR2	N.S.
2.77485	-0.721337	1.02247	-0.705486	0.480508	0.604528	AARD	N.S.
7769.16	0.176686	0.162231	1.0891	0.27611	0.401072	AARS	N.S.
1451.54	-0.32553	0.117604	-2.76801	0.00563995	0.0156544	AARS2	padj<0.05 & Downregulated
2270.7	-0.224229	0.0927648	-2.41718	0.0156414	0.0378938	AARSD1	padj<0.05 & Downregulated
977.316	-0.0223887	0.110789	-0.202085	0.839851	0.89352	AASDH	N.S.
4791.7	-0.27554	0.132606	-2.07789	0.0377199	0.0800183	AASDHPPT	N.S.
39.359	-0.180119	0.31186	-0.577565	0.563558	0.678082	AASS	N.S.
7998.98	0.283654	0.0869537	3.26213	0.00110579	0.00367002	AATF	padj<0.05 & Upregulated
1088.47	-0.488088	0.240394	-2.03037	0.0423188	0.0883002	AATK	N.S.
1084.7	1.48654	0.159015	9.34846	8.89325e-21	1.70537e-19	ABAT	padj<0.05 & Upregulated
56.6896	0.16256	0.435289	0.373454	0.708811	0.796036	ABC7-42404400C24.1	N.S.
639.732	5.49145	0.384745	14.273	3.22514e-46	1.61544e-44	ABCA1	padj<0.05 & Upregulated
11.5851	1.89663	0.953228	1.98969	0.0466248	0.0957828	ABCA10	N.S.
51.7131	6.20536	0.731398	8.48424	2.1714e-17	3.40375e-16	ABCA12	padj<0.05 & Upregulated
30.3254	3.23187	0.99257	3.25607	0.00112967	0.00374503	ABCA13	padj<0.05 & Upregulated
6623.94	-0.170109	0.145083	-1.1725	0.240997	0.360771	ABCA2	N.S.
12306.1	-0.373447	0.147151	-2.53785	0.0111536	0.0284472	ABCA3	padj<0.05 & Downregulated
325.936	4.82778	0.644855	7.4866	7.06806e-14	8.84446e-13	ABCA4	padj<0.05 & Upregulated
550.717	0.590756	0.26133	2.26057	0.0237859	0.0542685	ABCA5	N.S.
0.737388	1.01836	2.88117	0.353452	0.723749	0.808448	ABCA6	N.S.
1636.9	0.571993	0.240003	2.38328	0.0171593	0.0410124	ABCA7	padj<0.05 & Upregulated
3.21271	3.25834	2.14599	1.51834	0.128928	0.220653	ABCA8	N.S.
0.594959	0.601761	3.01303	0.19972	0.8417	0.894625	ABCA9	N.S.
54.691	3.99467	0.665727	6.00046	1.96765e-09	1.62396e-08	ABCB1	padj<0.05 & Upregulated
3979.59	-0.655908	0.149774	-4.37931	1.19055e-05	5.85236e-05	ABCB10	padj<0.05 & Downregulated
1.53085	3.14522	2.0234	1.55442	0.120085	0.208589	ABCB11	N.S.
2.39824	3.61297	1.61644	2.23514	0.0254082	0.057451	ABCB4	N.S.
357.022	-1.33581	0.371535	-3.59539	0.000323906	0.00122393	ABCB5	padj<0.05 & Downregulated
413.128	1.46966	0.248026	5.92543	3.11488e-09	2.50556e-08	ABCB6	padj<0.05 & Upregulated
2164.18	-0.00211385	0.165339	-0.0127849	0.989799	0.99419	ABCB7	N.S.
1956.88	0.365823	0.107799	3.39357	0.000689891	0.00241336	ABCB8	padj<0.05 & Upregulated
1044.66	-0.605021	0.15676	-3.85955	0.000113597	0.000470784	ABCB9	padj<0.05 & Downregulated
8137.88	0.310693	0.0903018	3.44061	0.000580403	0.00207273	ABCC1	padj<0.05 & Upregulated
2119.03	0.00995708	0.11961	0.0832465	0.933656	0.957777	ABCC10	N.S.
22.9964	0.0216149	0.418024	0.0517074	0.958762	0.974244	ABCC11	N.S.
0.77135	3.09353	2.22251	1.39191	0.163951	0.267211	ABCC12	N.S.
169.393	3.48665	0.386342	9.02477	1.8007e-19	3.20941e-18	ABCC2	padj<0.05 & Upregulated
150.568	0.673708	0.286319	2.353	0.0186225	0.043967	ABCC3	padj<0.05 & Upregulated
3251.18	-0.597478	0.175867	-3.39734	0.000680448	0.0023841	ABCC4	padj<0.05 & Downregulated
4819.83	-0.13993	0.145899	-0.959089	0.337514	0.46718	ABCC5	N.S.
39.5466	0.350694	0.383677	0.914035	0.360698	0.491121	ABCC6	N.S.
291.387	-0.0669783	0.38872	-0.172305	0.863198	0.909916	ABCC8	N.S.
5.02233	1.53706	0.870249	1.76623	0.077357	0.145979	ABCC9	N.S.
3322.38	-0.123761	0.173814	-0.712033	0.476444	0.60089	ABCD1	N.S.
62.4362	-3.26086	0.573201	-5.68885	1.27899e-08	9.60951e-08	ABCD2	padj<0.05 & Downregulated
5490.59	0.052781	0.142584	0.370174	0.711253	0.798111	ABCD3	N.S.
3359.01	0.323329	0.12128	2.66597	0.00767673	0.0205329	ABCD4	padj<0.05 & Upregulated
10387.4	-0.493816	0.131276	-3.76166	0.000168787	0.000677128	ABCE1	padj<0.05 & Downregulated
12110.8	-0.0182326	0.075	-0.243101	0.807927	0.871148	ABCF1	N.S.
8292.23	-0.160619	0.0778859	-2.06224	0.0391851	0.0826719	ABCF2	N.S.
6087.76	0.250917	0.11416	2.19795	0.0279527	0.0622198	ABCF3	N.S.
634.434	1.79858	0.326332	5.51151	3.55763e-08	2.51065e-07	ABCG1	padj<0.05 & Upregulated
31.532	-0.498862	0.343401	-1.45271	0.146304	0.243956	ABCG2	N.S.
378.666	-1.13502	0.314265	-3.61167	0.000304236	0.00115764	ABCG4	padj<0.05 & Downregulated
5.01919	-0.5124	0.771592	-0.664081	0.506638	0.627975	ABCG5	N.S.
0.846909	0.383049	1.82331	0.210085	0.833601	0.888988	ABCG8	N.S.
58.9062	-0.775747	0.252197	-3.07596	0.00209829	0.00651619	ABHD1	padj<0.05 & Downregulated
1953.3	-0.382063	0.174456	-2.19002	0.0285227	0.0632705	ABHD10	N.S.
3006.37	-0.00746032	0.195089	-0.0382406	0.969496	0.981147	ABHD11	N.S.
5483.76	0.265177	0.150232	1.76512	0.0775441	0.146253	ABHD12	N.S.
32.5447	-0.411666	0.395454	-1.041	0.297878	0.425465	ABHD12B	N.S.
2187.12	-0.0946782	0.0955811	-0.990554	0.321904	0.450655	ABHD13	N.S.
1206.27	-0.378926	0.102117	-3.71069	0.000206693	0.000815498	ABHD14A	padj<0.05 & Downregulated
63.7157	-0.199662	0.311821	-0.640309	0.521972	0.641838	ABHD14A-ACY1	N.S.
4994.5	-0.112302	0.163486	-0.686918	0.492134	0.614894	ABHD14B	N.S.
3633.75	-0.47065	0.186272	-2.52668	0.0115145	0.029211	ABHD15	padj<0.05 & Downregulated
2487.26	0.554598	0.113646	4.88005	1.06057e-06	6.10528e-06	ABHD16A	padj<0.05 & Upregulated
47.148	0.423987	1.8362	0.230904	0.817389	0.877064	ABHD16B	N.S.
7846.17	-0.0405136	0.13915	-0.291152	0.770935	0.843894	ABHD17A	N.S.
1872.92	-0.268039	0.0993286	-2.6985	0.00696518	0.0188622	ABHD17B	padj<0.05 & Downregulated
1295.78	0.0573813	0.159573	0.359592	0.719152	0.805005	ABHD17C	N.S.
835.278	0.000350916	0.124735	0.00281329	0.997755	0.998787	ABHD18	N.S.
3319.3	0.216298	0.133629	1.61864	0.105524	0.188326	ABHD2	N.S.
2141.05	-0.028592	0.203442	-0.140541	0.888233	0.927002	ABHD3	N.S.
470.586	1.55032	0.263745	5.8781	4.15006e-09	3.28967e-08	ABHD4	padj<0.05 & Upregulated
1324.76	0.442497	0.207239	2.1352	0.0327447	0.0709828	ABHD5	N.S.
1220.51	-0.691283	0.0920416	-7.51055	5.88804e-14	7.44808e-13	ABHD6	padj<0.05 & Downregulated
1664.27	0.0420847	0.262834	0.160119	0.872787	0.916254	ABHD8	N.S.
5934.09	0.163311	0.107958	1.51272	0.130351	0.222584	ABI1	N.S.
8059.63	-0.719179	0.104819	-6.86114	6.83119e-12	7.2079e-11	ABI2	padj<0.05 & Downregulated
5.99377	0.347871	1.02401	0.339715	0.734071	0.816046	ABI3	N.S.
81.1264	-0.718715	0.336478	-2.13599	0.0326801	0.0708604	ABI3BP	N.S.
6447.71	0.0995345	0.0922233	1.07928	0.280464	0.406247	ABL1	N.S.
5136.31	1.31678	0.122544	10.7454	6.23161e-27	1.60923e-25	ABL2	padj<0.05 & Upregulated
6077.8	2.3435	0.329014	7.1228	1.05758e-12	1.19473e-11	ABLIM1	padj<0.05 & Upregulated
612.657	0.8484	0.156013	5.43801	5.38798e-08	3.71511e-07	ABLIM2	padj<0.05 & Upregulated
148.645	3.69946	0.381403	9.69961	3.0264e-22	6.21419e-21	ABLIM3	padj<0.05 & Upregulated
0.238788	0.0554624	3.53381	0.0156948	0.987478	NA	ABO	N.S.
5348.24	0.440606	0.115164	3.8259	0.000130295	0.000532765	ABR	padj<0.05 & Upregulated
5.78125	-0.258821	0.820918	-0.315283	0.752547	0.830073	ABRA	N.S.
7996.29	-0.987019	0.185848	-5.3109	1.09086e-07	7.18353e-07	ABRACL	padj<0.05 & Downregulated
3779.08	-0.468629	0.0772893	-6.06331	1.33349e-09	1.1229e-08	ABT1	padj<0.05 & Downregulated
1720.59	1.4034	0.227571	6.16686	6.96577e-10	6.04382e-09	ABTB1	padj<0.05 & Upregulated
1501.67	2.1017	0.159172	13.204	8.32401e-40	3.47119e-38	ABTB2	padj<0.05 & Upregulated
14.6289	0.461969	0.846755	0.545576	0.585358	0.697143	AC002310.11	N.S.
0	NA	NA	NA	NA	NA	AC002310.13	N.S.
376.915	0.455247	0.168024	2.70941	0.00674034	0.0183179	AC002398.9	padj<0.05 & Upregulated
9.13477	0.394682	0.688232	0.573473	0.566325	0.680566	AC002985.3	N.S.
0	NA	NA	NA	NA	NA	AC003002.4	N.S.
2.52998	0.913111	1.49053	0.612609	0.540135	0.65757	AC003002.6	N.S.
0.243669	0.0696953	3.53381	0.0197224	0.984265	NA	AC003005.4	N.S.
0	NA	NA	NA	NA	NA	AC003006.7	N.S.
0	NA	NA	NA	NA	NA	AC004076.7	N.S.
3.10522	1.17866	1.24541	0.9464	0.343945	0.474162	AC004076.9	N.S.
0.232342	0.0483901	3.53381	0.0136935	0.989075	NA	AC004158.1	N.S.
77.162	6.06059	1.14526	5.2919	1.21054e-07	7.92967e-07	AC004231.7	padj<0.05 & Upregulated
297.519	-0.790363	0.16228	-4.87037	1.11391e-06	6.38285e-06	AC004381.6	padj<0.05 & Downregulated
1.5561	-4.05584	2.19595	-1.84697	0.0647516	0.125913	AC004556.1	N.S.
43.8433	0.603556	0.271878	2.21995	0.0264222	0.0593588	AC004754.3	N.S.
0.490237	-2.38643	3.05896	-0.780144	0.435306	NA	AC004813.1	N.S.
0	NA	NA	NA	NA	NA	AC004824.2	N.S.
0	NA	NA	NA	NA	NA	AC004824.3	N.S.
0	NA	NA	NA	NA	NA	AC004853.1	N.S.
0	NA	NA	NA	NA	NA	AC004953.1	N.S.
0	NA	NA	NA	NA	NA	AC005042.1	N.S.
0.75985	3.07449	2.26843	1.35534	0.175309	0.281745	AC005477.1	N.S.
1.1115	1.02292	1.71252	0.597319	0.550294	0.66654	AC005480.1	N.S.
0.841431	3.23055	2.6108	1.23738	0.215945	0.332169	AC005779.2	N.S.
54.4997	-0.872238	3.2292	-0.27011	NA	NA	AC005943.2	N.S.
1.23343	-0.492726	1.64713	-0.299142	0.764831	0.83874	AC006026.2	N.S.
0	NA	NA	NA	NA	NA	AC006328.4	N.S.
0.606694	1.71652	2.96545	0.57884	0.562697	0.677514	AC006386.1	N.S.
0	NA	NA	NA	NA	NA	AC006445.1	N.S.
80.7738	0.274456	0.275218	0.99723	0.318653	0.447253	AC006449.1	N.S.
80.7738	0.274456	0.275218	0.99723	0.318653	0.447253	AC006449.2	N.S.
4.2144	1.92224	1.50936	1.27355	0.202823	0.316821	AC006486.9	N.S.
0	NA	NA	NA	NA	NA	AC006538.4	N.S.
0.123055	0.776761	3.53381	0.219808	0.826021	NA	AC006994.3	N.S.
106.521	-1.14127	0.356506	-3.20128	0.00136819	0.00444944	AC007040.11	padj<0.05 & Downregulated
0.362142	2.01526	3.48979	0.577473	0.56362	NA	AC007163.2	N.S.
133.711	-0.245104	0.562038	-0.436099	0.662765	0.759843	AC007192.4	N.S.
0	NA	NA	NA	NA	NA	AC007325.1	N.S.
1092.39	0.901273	0.251498	3.58362	0.000338869	0.0012722	AC007325.2	padj<0.05 & Upregulated
2190.4	-0.334947	0.178976	-1.87147	0.0612804	0.120304	AC007325.4	N.S.
1.73905	-4.21034	1.72145	-2.4458	0.0144529	0.035431	AC007326.1	padj<0.05 & Downregulated
0	NA	NA	NA	NA	NA	AC007557.5	N.S.
1.25777	1.14843	2.15633	0.532585	0.594321	0.704064	AC007906.1	N.S.
2.42996	0.337113	1.9325	0.174444	0.861516	0.908916	AC008074.1	N.S.
24.441	-2.35121	1.1218	-2.09592	0.0360889	0.077148	AC008522.1	N.S.
0	NA	NA	NA	NA	NA	AC008622.1	N.S.
0	NA	NA	NA	NA	NA	AC008641.1	N.S.
0	NA	NA	NA	NA	NA	AC008686.1	N.S.
0	NA	NA	NA	NA	NA	AC008759.1	N.S.
0	NA	NA	NA	NA	NA	AC008810.1	N.S.
0	NA	NA	NA	NA	NA	AC008914.1	N.S.
1.11623	-1.07402	1.95078	-0.550559	0.581936	0.694015	AC009022.1	N.S.
1.35308	-0.218503	1.61778	-0.135063	0.892562	0.929794	AC009060.2	N.S.
6.32844	-0.666557	0.735342	-0.906458	0.364693	0.494975	AC009060.3	N.S.
0.482064	-2.36466	3.46067	-0.683296	0.49442	NA	AC009065.4	N.S.
0	NA	NA	NA	NA	NA	AC009121.2	N.S.
64.2701	-1.42978	2.3601	-0.605814	0.544638	0.66162	AC009133.22	N.S.
6.90509	-2.45803	3.27132	-0.751386	NA	NA	AC009133.23	N.S.
8.59849	-0.266547	1.21522	-0.219342	0.826384	0.883742	AC009336.19	N.S.
0	NA	NA	NA	NA	NA	AC009491.1	N.S.
0	NA	NA	NA	NA	NA	AC009491.2	N.S.
0	NA	NA	NA	NA	NA	AC009758.1	N.S.
7.85452	-6.38901	3.38818	-1.88568	0.0593383	0.117217	AC009950.1	N.S.
0	NA	NA	NA	NA	NA	AC009977.1	N.S.
0	NA	NA	NA	NA	NA	AC010184.1	N.S.
0.52906	0.0599445	2.64081	0.0226993	0.98189	NA	AC010287.1	N.S.
1.19824	-0.607792	1.64726	-0.368971	0.71215	0.79886	AC010412.1	N.S.
58.2318	-0.393728	0.809478	-0.486398	0.626685	0.730637	AC010547.9	N.S.
103.107	-0.974052	0.208169	-4.67913	2.88088e-06	1.55711e-05	AC010642.1	padj<0.05 & Downregulated
0.248756	0.0557942	3.53381	0.0157887	0.987403	NA	AC010646.3	N.S.
0	NA	NA	NA	NA	NA	AC010655.1	N.S.
122.421	0.0635284	0.252516	0.251582	0.801364	0.866914	AC011043.1	N.S.
0.650897	-0.499416	2.20036	-0.22697	0.820447	0.879357	AC011043.2	N.S.
0	NA	NA	NA	NA	NA	AC011155.1	N.S.
0.698893	-2.90291	3.43679	-0.844657	0.398302	0.527569	AC011295.1	N.S.
0	NA	NA	NA	NA	NA	AC011380.1	N.S.
0.314094	-0.42064	3.53201	-0.119094	0.905201	NA	AC011513.3	N.S.
3.48789	-0.94261	1.31204	-0.718429	0.472493	0.596813	AC011530.4	N.S.
0.650897	-0.499416	2.20036	-0.22697	0.820447	0.879357	AC011841.1	N.S.
5.1818	-0.29464	0.912557	-0.322873	0.746791	0.82592	AC012005.3	N.S.
0	NA	NA	NA	NA	NA	AC012005.4	N.S.
7026.58	-0.354189	0.144838	-2.44542	0.0144684	0.035446	AC012314.2	padj<0.05 & Downregulated
7650.05	-0.363271	0.117206	-3.09941	0.00193905	0.00606409	AC012314.3	padj<0.05 & Downregulated
7025.86	-0.354023	0.144764	-2.44552	0.0144643	0.0354415	AC012314.5	padj<0.05 & Downregulated
7692.94	-0.388752	0.127213	-3.05591	0.00224375	0.00691983	AC012314.6	padj<0.05 & Downregulated
7449.56	-0.360266	0.113862	-3.16406	0.00155586	0.00499085	AC012314.7	padj<0.05 & Downregulated
7055.97	-0.340499	0.142444	-2.3904	0.0168299	0.0403247	AC012314.9	padj<0.05 & Downregulated
0	NA	NA	NA	NA	NA	AC012363.2	N.S.
0	NA	NA	NA	NA	NA	AC013269.5	N.S.
0	NA	NA	NA	NA	NA	AC013286.1	N.S.
3174.68	-0.493806	0.141245	-3.4961	0.000472115	0.00171518	AC013461.1	padj<0.05 & Downregulated
2.03461	0.277997	1.97695	0.140619	0.888171	0.927002	AC015688.3	N.S.
0.240716	1.4932	3.52645	0.42343	0.671982	NA	AC016142.1	N.S.
0.506465	2.4881	3.02824	0.821632	0.411287	NA	AC016549.1	N.S.
1.17344	3.6989	3.01704	1.226	0.220198	0.336961	AC016577.1	N.S.
0	NA	NA	NA	NA	NA	AC016734.1	N.S.
0	NA	NA	NA	NA	NA	AC016753.2	N.S.
0	NA	NA	NA	NA	NA	AC017028.10	N.S.
0.120516	-0.665912	3.53381	-0.18844	0.850532	NA	AC017081.1	N.S.
0	NA	NA	NA	NA	NA	AC018512.1	N.S.
0.489385	0.0104519	3.18589	0.0032807	0.997382	NA	AC018755.18	N.S.
0	NA	NA	NA	NA	NA	AC018867.1	N.S.
0	NA	NA	NA	NA	NA	AC018902.1	N.S.
0	NA	NA	NA	NA	NA	AC019206.1	N.S.
2.40568	0.245714	1.23906	0.198307	0.842805	0.895366	AC021106.1	N.S.
0.473328	-1.22215	3.15556	-0.3873	0.698534	NA	AC022016.1	N.S.
0	NA	NA	NA	NA	NA	AC022210.1	N.S.
1.19824	-0.607792	1.64726	-0.368971	0.71215	0.79886	AC022405.1	N.S.
0	NA	NA	NA	NA	NA	AC022819.2	N.S.
0	NA	NA	NA	NA	NA	AC023491.2	N.S.
0	NA	NA	NA	NA	NA	AC024060.1	N.S.
0	NA	NA	NA	NA	NA	AC024361.1	N.S.
157.175	0.462619	0.213025	2.17166	0.0298812	0.0658647	AC024592.12	N.S.
0	NA	NA	NA	NA	NA	AC025263.3	N.S.
2.14907	0.572426	1.368	0.418439	0.675626	0.770635	AC026248.1	N.S.
0.354623	-0.652812	3.42993	-0.190328	0.849052	NA	AC026369.1	N.S.
0	NA	NA	NA	NA	NA	AC026449.1	N.S.
28.8199	-0.307918	0.679838	-0.452929	0.6506	0.75009	AC037459.4	N.S.
0	NA	NA	NA	NA	NA	AC037482.2	N.S.
0	NA	NA	NA	NA	NA	AC044810.2	N.S.
0	NA	NA	NA	NA	NA	AC055733.1	N.S.
0	NA	NA	NA	NA	NA	AC055866.1	N.S.
0	NA	NA	NA	NA	NA	AC063956.1	N.S.
0	NA	NA	NA	NA	NA	AC063956.2	N.S.
0	NA	NA	NA	NA	NA	AC064829.1	N.S.
0	NA	NA	NA	NA	NA	AC066615.1	N.S.
35.7966	0.0373517	0.525006	0.0711453	0.943282	0.963795	AC068533.7	N.S.
0	NA	NA	NA	NA	NA	AC069063.1	N.S.
0.375302	-1.99757	3.48274	-0.573562	0.566264	NA	AC069063.2	N.S.
1.16946	2.34318	1.87872	1.24722	0.212316	0.327656	AC069368.3	N.S.
0	NA	NA	NA	NA	NA	AC069499.1	N.S.
0	NA	NA	NA	NA	NA	AC073072.1	N.S.
0	NA	NA	NA	NA	NA	AC073130.2	N.S.
0.123055	0.776761	3.53381	0.219808	0.826021	NA	AC073333.1	N.S.
0	NA	NA	NA	NA	NA	AC073610.5	N.S.
0.237615	-1.37606	3.53172	-0.389629	0.696811	NA	AC073657.1	N.S.
0	NA	NA	NA	NA	NA	AC074033.1	N.S.
0	NA	NA	NA	NA	NA	AC079355.1	N.S.
0	NA	NA	NA	NA	NA	AC079907.1	N.S.
3.32248	-5.14504	3.09104	-1.6645	0.0960127	0.174079	AC084219.2	N.S.
0	NA	NA	NA	NA	NA	AC087350.1	N.S.
0	NA	NA	NA	NA	NA	AC087392.1	N.S.
0	NA	NA	NA	NA	NA	AC087651.1	N.S.
0	NA	NA	NA	NA	NA	AC087651.2	N.S.
1.91871	3.58209	1.98995	1.80009	0.0718467	0.137305	AC087762.1	N.S.
0	NA	NA	NA	NA	NA	AC090154.1	N.S.
27120.7	-0.114541	0.148061	-0.773606	0.439164	0.566203	AC090498.1	N.S.
0	NA	NA	NA	NA	NA	AC090958.1	N.S.
0	NA	NA	NA	NA	NA	AC091180.1	N.S.
0	NA	NA	NA	NA	NA	AC091304.2	N.S.
0	NA	NA	NA	NA	NA	AC092159.1	N.S.
0	NA	NA	NA	NA	NA	AC092384.1	N.S.
0	NA	NA	NA	NA	NA	AC092718.1	N.S.
27.2481	-0.792774	0.589354	-1.34516	0.178574	0.285729	AC092835.2	N.S.
0.759223	-2.03209	2.36875	-0.857877	0.390961	0.520693	AC092881.1	N.S.
0	NA	NA	NA	NA	NA	AC100821.2	N.S.
0	NA	NA	NA	NA	NA	AC104057.1	N.S.
0	NA	NA	NA	NA	NA	AC104073.2	N.S.
0	NA	NA	NA	NA	NA	AC104389.1	N.S.
0	NA	NA	NA	NA	NA	AC104389.2	N.S.
3.75486	-1.30011	1.19616	-1.0869	0.277082	0.402205	AC104532.2	N.S.
127.237	2.57653	0.567835	4.53746	5.69365e-06	2.95112e-05	AC104534.3	padj<0.05 & Upregulated
0	NA	NA	NA	NA	NA	AC104581.1	N.S.
0	NA	NA	NA	NA	NA	AC104650.2	N.S.
0.593719	-0.48972	3.04785	-0.160677	0.872348	0.915907	AC104981.1	N.S.
0	NA	NA	NA	NA	NA	AC105009.1	N.S.
1.46791	-3.96888	2.20844	-1.79715	0.0723124	0.138013	AC105052.2	N.S.
0	NA	NA	NA	NA	NA	AC107081.1	N.S.
0.359301	-0.671121	3.41839	-0.196327	0.844355	NA	AC108925.1	N.S.
14.9945	5.31834	1.13875	4.67032	3.00727e-06	1.62089e-05	AC108938.5	padj<0.05 & Upregulated
0	NA	NA	NA	NA	NA	AC109344.1	N.S.
9.95514	-0.140037	0.546036	-0.256462	0.797594	0.864176	AC109486.1	N.S.
0.121161	-0.665912	3.53381	-0.18844	0.850532	NA	AC109829.1	N.S.
0.869663	-1.23369	2.33286	-0.528832	0.596922	0.706618	AC109829.2	N.S.
0	NA	NA	NA	NA	NA	AC110602.1	N.S.
212.247	1.37374	0.931352	1.475	0.140214	0.235725	AC110615.1	N.S.
0	NA	NA	NA	NA	NA	AC112719.2	N.S.
613.665	-0.652292	0.180543	-3.61295	0.000302737	0.00115218	AC113404.1	padj<0.05 & Downregulated
0	NA	NA	NA	NA	NA	AC118758.1	N.S.
0	NA	NA	NA	NA	NA	AC123512.1	N.S.
0	NA	NA	NA	NA	NA	AC123512.2	N.S.
0	NA	NA	NA	NA	NA	AC123512.3	N.S.
0.39616	0.800521	3.32725	0.240595	0.809869	NA	AC124312.1	N.S.
0	NA	NA	NA	NA	NA	AC126407.1	N.S.
160.6	-1.1341	0.335726	-3.37804	0.000730037	0.00253542	AC129492.1	padj<0.05 & Downregulated
60.1161	0.41297	0.311091	1.32749	0.184346	0.293345	AC130310.1	N.S.
0	NA	NA	NA	NA	NA	AC131263.1	N.S.
48.2307	0.269325	0.682645	0.394531	0.693189	0.784535	AC133551.1	N.S.
0	NA	NA	NA	NA	NA	AC136352.4	N.S.
0.117243	-0.670608	3.53381	-0.189769	0.84949	NA	AC136352.5	N.S.
120.317	-0.243549	0.304186	-0.800658	0.423329	0.551417	AC136612.1	N.S.
1968.43	-0.041714	0.14716	-0.283461	0.776824	0.848635	AC136616.1	N.S.
0	NA	NA	NA	NA	NA	AC136616.2	N.S.
0	NA	NA	NA	NA	NA	AC136616.3	N.S.
0	NA	NA	NA	NA	NA	AC138028.1	N.S.
3572.31	0.666041	0.16192	4.11339	3.89884e-05	0.000176018	AC138969.4	padj<0.05 & Upregulated
0	NA	NA	NA	NA	NA	AC141272.1	N.S.
0	NA	NA	NA	NA	NA	AC142525.1	N.S.
1075.77	0.612489	0.160437	3.81764	0.000134734	0.000549366	AC145212.2	padj<0.05 & Upregulated
761.435	0.00104425	0.108854	0.00959319	0.992346	0.99549	AC145212.4	N.S.
28.4799	-0.881154	0.530805	-1.66003	0.0969075	0.175428	AC156455.2	N.S.
0	NA	NA	NA	NA	NA	AC171558.1	N.S.
0	NA	NA	NA	NA	NA	AC171558.2	N.S.
0.24611	1.51679	3.525	0.430296	0.66698	NA	AC208162.1	N.S.
0.360066	0.765544	3.40989	0.224507	0.822363	NA	AC213203.1	N.S.
0	NA	NA	NA	NA	NA	AC231657.1	N.S.
0	NA	NA	NA	NA	NA	AC233755.1	N.S.
0	NA	NA	NA	NA	NA	AC233755.2	N.S.
10.5931	0.673579	0.699387	0.9631	0.335497	0.46498	AC234582.1	N.S.
0.236369	0.0538994	3.53381	0.0152525	0.987831	NA	AC234582.2	N.S.
0	NA	NA	NA	NA	NA	AC236040.1	N.S.
3303.78	0.126138	0.0866597	1.45555	0.145516	0.242866	AC240274.1	N.S.
23.6421	-0.0940407	0.705679	-0.133263	0.893986	0.930721	AC241377.2	N.S.
414.428	0.284913	0.285069	0.999454	0.317575	0.446243	AC241585.2	N.S.
0	NA	NA	NA	NA	NA	AC242988.1	N.S.
30.6115	-1.79615	0.44773	-4.01167	6.02896e-05	0.000262898	AC243687.1	padj<0.05 & Downregulated
0.238145	0.054878	3.53381	0.0155294	0.98761	NA	AC243756.1	N.S.
0	NA	NA	NA	NA	NA	AC243790.2	N.S.
0.235248	-1.37067	3.53268	-0.387997	0.698019	NA	AC243945.1	N.S.
0	NA	NA	NA	NA	NA	AC245015.1	N.S.
340.514	0.248057	0.338668	0.732447	0.463896	0.589672	AC245100.1	N.S.
102.095	0.0267562	0.188059	0.142276	0.886862	0.926207	AC253572.1	N.S.
12.6904	-1.04992	0.810028	-1.29616	0.194922	0.306706	AC254560.1	N.S.
0	NA	NA	NA	NA	NA	AC254788.1	N.S.
0.24611	1.51679	3.525	0.430296	0.66698	NA	AC254847.1	N.S.
0.115764	0.776269	3.53381	0.219669	0.826129	NA	AC254944.3	N.S.
0	NA	NA	NA	NA	NA	AC254995.1	N.S.
4662.41	0.88485	0.166327	5.31993	1.03808e-07	6.86186e-07	ACAA1	padj<0.05 & Upregulated
4698.8	0.0707008	0.130281	0.542677	0.587352	0.698753	ACAA2	N.S.
6214	-0.0587674	0.0893936	-0.6574	0.510924	0.631759	ACACA	N.S.
1416.76	-0.920503	0.12396	-7.4258	1.12104e-13	1.37225e-12	ACACB	padj<0.05 & Downregulated
3013.98	-0.527637	0.126648	-4.16617	3.09763e-05	0.000142054	ACAD10	padj<0.05 & Downregulated
2479.13	-0.205459	0.0919686	-2.23402	0.0254821	0.0575808	ACAD11	N.S.
2169.91	-0.054679	0.100845	-0.542207	0.587676	0.698996	ACAD8	N.S.
2362.46	-0.0370956	0.13752	-0.269748	0.787354	0.85681	ACAD9	N.S.
8.03418	3.17909	1.25732	2.52847	NA	NA	ACADL	N.S.
2844.21	-0.509325	0.10043	-5.07145	3.94787e-07	2.41967e-06	ACADM	padj<0.05 & Downregulated
417.575	-0.128575	0.277801	-0.462832	0.643485	0.744595	ACADS	N.S.
1873.64	0.0029314	0.1203	0.0243674	0.98056	0.988156	ACADSB	N.S.
32598.3	0.41011	0.168775	2.42992	0.0151023	0.0367818	ACADVL	padj<0.05 & Upregulated
15.3937	1.08089	0.665313	1.62464	0.104239	0.186396	ACAN	N.S.
206.784	-0.69046	0.320674	-2.15315	0.0313068	0.0684103	ACAP1	N.S.
4795.79	-0.0459686	0.121952	-0.37694	0.706218	0.794558	ACAP2	N.S.
5093.02	-0.391341	0.176003	-2.2235	0.0261823	0.0588882	ACAP3	N.S.
5908.46	-0.419253	0.166445	-2.51887	0.0117733	0.0297463	ACAT1	padj<0.05 & Downregulated
2123.6	0.0252343	0.176349	0.143093	0.886217	0.925896	ACAT2	N.S.
9440.32	0.271221	0.133585	2.03032	0.042324	0.0883003	ACBD3	N.S.
1179.73	-0.608614	0.218004	-2.79176	0.00524227	0.0146674	ACBD4	padj<0.05 & Downregulated
2490.94	-0.00924746	0.103552	-0.0893022	0.928842	0.954889	ACBD5	N.S.
4362.31	-0.299328	0.127362	-2.35022	0.0187624	0.0442697	ACBD6	padj<0.05 & Downregulated
45.8885	-1.06458	0.396896	-2.68226	0.00731273	0.0196917	ACBD7	padj<0.05 & Downregulated
779.38	-0.735891	0.300388	-2.4498	0.0142937	0.0351144	ACCS	padj<0.05 & Downregulated
0	NA	NA	NA	NA	NA	ACCSL	N.S.
2011.67	-0.23442	0.100995	-2.3211	0.0202815	0.0473009	ACD	padj<0.05 & Downregulated
6.11904	-0.237201	0.845212	-0.280641	0.778985	0.850303	ACE	N.S.
57.8589	5.53701	0.593934	9.32259	1.13536e-20	2.16289e-19	ACE2	padj<0.05 & Upregulated
0.492219	2.45323	3.46228	0.708561	0.478597	NA	ACER1	N.S.
350.497	-0.319692	0.224919	-1.42136	0.155211	0.256104	ACER2	N.S.
2644.33	-0.262161	0.139109	-1.88457	0.0594875	0.117446	ACER3	N.S.
526.455	1.91405	0.232768	8.22298	1.98503e-16	2.915e-15	ACHE	padj<0.05 & Upregulated
12360.5	0.202188	0.0950553	2.12706	0.0334153	0.0722031	ACIN1	N.S.
0.123055	0.776761	3.53381	0.219808	0.826021	NA	ACKR1	N.S.
60.097	1.68213	0.273957	6.14014	8.24475e-10	7.11105e-09	ACKR2	padj<0.05 & Upregulated
81.3576	5.06277	0.509535	9.93606	2.90088e-23	6.28921e-22	ACKR3	padj<0.05 & Upregulated
11.25	1.94218	0.579222	3.35309	0.000799147	0.00275078	ACKR4	padj<0.05 & Upregulated
25514	0.0602678	0.114359	0.527003	0.598191	0.707544	ACLY	N.S.
1.34445	-2.99043	1.99972	-1.49543	0.134803	0.228732	ACMSD	N.S.
3160.79	-1.11534	0.096069	-11.6098	3.67432e-31	1.12363e-29	ACO1	padj<0.05 & Downregulated
23614.4	-0.516584	0.162002	-3.18875	0.00142888	0.00462521	ACO2	padj<0.05 & Downregulated
472.158	-0.312252	0.137238	-2.27526	0.0228901	0.0524995	ACOT1	N.S.
1228.16	-0.0505155	0.144676	-0.349163	0.726967	0.810681	ACOT11	N.S.
10.9638	-1.82716	0.84386	-2.16525	0.0303689	0.0667204	ACOT12	N.S.
4694.04	-0.661736	0.146793	-4.50795	6.54566e-06	3.35581e-05	ACOT13	padj<0.05 & Downregulated
4966.28	-0.370292	0.108824	-3.40266	0.000667324	0.00234282	ACOT2	padj<0.05 & Downregulated
4.19619	0.549356	0.842363	0.65216	0.514298	0.635031	ACOT4	N.S.
1.08232	-0.995807	1.95158	-0.510257	0.609871	0.717616	ACOT6	N.S.
14148.5	-0.57833	0.0922207	-6.27115	3.58381e-10	3.19536e-09	ACOT7	padj<0.05 & Downregulated
771.562	0.200871	0.140864	1.42599	0.15387	0.254305	ACOT8	N.S.
4642.94	0.101831	0.117472	0.866853	0.386023	0.515765	ACOT9	N.S.
4952.44	-0.247759	0.110843	-2.23523	0.0254024	0.0574454	ACOX1	N.S.
32.8602	2.36689	0.456948	5.17977	2.22165e-07	1.41282e-06	ACOX2	padj<0.05 & Upregulated
1707.39	0.0498709	0.132003	0.377802	0.705578	0.794042	ACOX3	N.S.
2.81373	0.373056	1.0256	0.363745	0.716048	0.802252	ACOXL	N.S.
11648.1	-0.0276944	0.0861803	-0.321354	0.747942	0.826772	ACP1	N.S.
4065.3	0.339208	0.106129	3.19617	0.00139264	0.00452133	ACP2	padj<0.05 & Upregulated
8.34088	0.422419	0.844755	0.500049	0.61704	0.722679	ACP5	N.S.
1453.48	-0.192999	0.145726	-1.3244	0.185372	0.294496	ACP6	N.S.
0	NA	NA	NA	NA	NA	ACP7	N.S.
1.34626	2.06215	1.64637	1.25254	0.210373	0.325551	ACPP	N.S.
0.64477	-0.520845	2.20164	-0.236571	0.812989	0.874335	ACPT	N.S.
18.3169	1.46948	0.485222	3.02847	0.00245794	0.00748503	ACR	padj<0.05 & Upregulated
43.2806	0.84272	0.428743	1.96556	0.0493493	0.100621	ACRBP	N.S.
107.078	0.321722	0.279567	1.15079	0.24982	0.371205	ACRC	N.S.
10.3299	-0.370118	0.622404	-0.594659	0.552071	0.667811	ACRV1	N.S.
14.4505	-0.263973	0.784032	-0.336686	0.736353	0.818009	ACSBG1	N.S.
1.08796	1.72165	2.3395	0.735906	0.461788	0.587635	ACSBG2	N.S.
1151.07	-0.115888	0.218499	-0.530383	0.595846	0.705536	ACSF2	N.S.
2702.31	0.124758	0.131542	0.948429	0.342911	0.473073	ACSF3	N.S.
5118.15	-0.372409	0.174715	-2.13152	0.0330459	0.0715202	ACSL1	N.S.
7405.49	1.12655	0.201014	5.60431	2.09085e-08	1.52237e-07	ACSL3	padj<0.05 & Upregulated
2432.06	1.2126	0.174062	6.96648	3.24972e-12	3.53374e-11	ACSL4	padj<0.05 & Upregulated
925.819	6.35486	0.305993	20.768	8.43555e-96	1.1578e-93	ACSL5	padj<0.05 & Upregulated
91.4076	-0.78831	0.389373	-2.02456	0.0429122	0.0892817	ACSL6	N.S.
0.68352	2.8869	2.34969	1.22863	0.21921	0.336093	ACSM1	N.S.
0	NA	NA	NA	NA	NA	ACSM2A	N.S.
0	NA	NA	NA	NA	NA	ACSM2B	N.S.
14.0623	0.853427	0.604783	1.41113	0.158207	0.259793	ACSM3	N.S.
0	NA	NA	NA	NA	NA	ACSM4	N.S.
2.45596	4.77225	1.69966	2.80777	0.00498855	0.0140341	ACSM5	padj<0.05 & Upregulated
1.61725	-1.03281	1.49875	-0.689118	0.490749	0.613604	ACSM6	N.S.
3.80699	0.068528	0.929235	0.0737467	0.941212	0.962583	ACSS1	N.S.
6532.45	0.026223	0.149653	0.175225	0.860903	0.908487	ACSS2	N.S.
5.69678	-0.0297633	1.38377	-0.0215088	0.98284	0.989622	ACSS3	N.S.
41.3456	-0.144747	0.349609	-0.414025	0.678855	0.773299	ACTA1	N.S.
1963.34	1.27964	0.193252	6.6216	3.55326e-11	3.45629e-10	ACTA2	padj<0.05 & Upregulated
362428	0.417274	0.158067	2.63986	0.00829403	0.0219483	ACTB	padj<0.05 & Upregulated
2346.14	6.86082	0.32511	21.103	7.45808e-99	1.07439e-96	ACTBL2	padj<0.05 & Upregulated
1.72918	1.56111	1.8214	0.857093	0.391393	0.521031	ACTC1	N.S.
469636	-0.254221	0.0846708	-3.00247	0.00267802	0.00806924	ACTG1	padj<0.05 & Downregulated
7.61424	1.63208	0.713153	2.28855	0.0221058	0.0510163	ACTG2	N.S.
3.87479	0.659307	0.976325	0.675295	0.499489	0.621411	ACTL10	N.S.
4279.66	-0.323458	0.0749018	-4.31844	1.57139e-05	7.55403e-05	ACTL6A	padj<0.05 & Downregulated
8.0057	-2.18464	0.830285	-2.6312	0.00850851	0.0224403	ACTL6B	padj<0.05 & Downregulated
0.231685	1.45717	3.52932	0.412876	0.679698	NA	ACTL7A	N.S.
2.16538	0.650503	1.24193	0.523784	0.600429	0.709228	ACTL7B	N.S.
19.7654	1.52122	0.573197	2.65391	0.00795641	0.0211673	ACTL8	padj<0.05 & Upregulated
0	NA	NA	NA	NA	NA	ACTL9	N.S.
26003.2	1.1903	0.11388	10.4522	1.43223e-25	3.48677e-24	ACTN1	padj<0.05 & Upregulated
51.4577	2.40067	0.351568	6.82849	8.58157e-12	8.97333e-11	ACTN2	padj<0.05 & Upregulated
9.31094	-0.517626	0.745344	-0.69448	0.487382	0.610769	ACTN3	N.S.
32615.4	1.96883	0.141582	13.9059	5.82955e-44	2.72426e-42	ACTN4	padj<0.05 & Upregulated
6723.7	0.322536	0.149593	2.15609	0.0310768	0.0680015	ACTR10	N.S.
13130.5	-0.0362176	0.0988265	-0.366476	0.71401	0.800534	ACTR1A	N.S.
5645.95	0.186925	0.162847	1.14786	0.251028	0.372555	ACTR1B	N.S.
36466.8	-0.420312	0.127962	-3.28467	0.00102101	0.00342059	ACTR2	padj<0.05 & Downregulated
20478.3	-0.28819	0.153399	-1.8787	0.0602853	0.118846	ACTR3	N.S.
745.038	-0.460743	0.126528	-3.64144	0.000271121	0.00104302	ACTR3B	padj<0.05 & Downregulated
6.95551	5.07112	1.37828	3.67931	0.000233869	0.000911597	ACTR3C	padj<0.05 & Upregulated
612.645	-0.237821	0.119483	-1.99041	0.0465458	0.095677	ACTR5	N.S.
2679.71	-0.216704	0.113348	-1.91185	0.0558952	0.111464	ACTR6	N.S.
2001.37	0.0755733	0.0824927	0.91612	0.359604	0.490025	ACTR8	N.S.
0	NA	NA	NA	NA	NA	ACTRT1	N.S.
0	NA	NA	NA	NA	NA	ACTRT2	N.S.
374.387	-0.359525	0.189754	-1.89469	0.0581337	0.115138	ACTRT3	N.S.
2439.25	0.544924	0.0826852	6.59035	4.38803e-11	4.21885e-10	ACVR1	padj<0.05 & Upregulated
1816.64	0.274987	0.110327	2.49248	0.0126855	0.0317155	ACVR1B	padj<0.05 & Upregulated
55.641	2.00538	0.267151	7.50653	6.07173e-14	7.6693e-13	ACVR1C	padj<0.05 & Upregulated
1331.03	-0.0413347	0.0833596	-0.49586	0.619993	0.72526	ACVR2A	N.S.
772.523	0.0649954	0.11114	0.584807	0.558678	0.67405	ACVR2B	N.S.
106.293	5.71004	0.608005	9.39143	5.91901e-21	1.14511e-19	ACVRL1	padj<0.05 & Upregulated
1865.11	-0.236651	0.136792	-1.73001	0.0836287	0.155508	ACY1	N.S.
0	NA	NA	NA	NA	NA	ACY3	N.S.
575.962	-0.404915	0.125027	-3.23862	0.00120109	0.00396143	ACYP1	padj<0.05 & Downregulated
1124.84	0.404025	0.148995	2.71167	0.00669453	0.0182161	ACYP2	padj<0.05 & Upregulated
28.9916	0.43574	0.357138	1.22009	0.222432	0.339421	AD000671.6	N.S.
1523.03	0.155041	0.151289	1.0248	0.305459	0.433494	ADA	N.S.
0	NA	NA	NA	NA	NA	ADAD1	N.S.
3.45549	2.76634	1.15935	2.38612	0.0170271	0.0407579	ADAD2	padj<0.05 & Upregulated
274.709	-0.0915709	0.147895	-0.619161	0.53581	0.654009	ADAL	N.S.
8150.7	0.0294253	0.172364	0.170716	0.864447	0.910794	ADAM10	N.S.
1579.04	-1.68162	0.504413	-3.33382	0.000856636	0.00292666	ADAM11	padj<0.05 & Downregulated
258.429	6.2546	0.988728	6.32591	2.51745e-10	2.27602e-09	ADAM12	padj<0.05 & Upregulated
7958	1.04342	0.176531	5.91069	3.40678e-09	2.72401e-08	ADAM15	padj<0.05 & Upregulated
5803.55	0.221714	0.175816	1.26106	0.207288	0.321862	ADAM17	N.S.
0.520085	-1.01835	3.06299	-0.33247	0.739535	NA	ADAM18	N.S.
4851.57	2.26641	0.136705	16.5788	9.91514e-62	6.9972e-60	ADAM19	padj<0.05 & Upregulated
0.587263	-2.34039	2.93159	-0.798335	0.424676	NA	ADAM2	N.S.
3.5101	0.894766	0.940377	0.951498	0.341352	0.471519	ADAM20	N.S.
26.4754	3.95097	0.596879	6.61939	3.60684e-11	3.50256e-10	ADAM21	padj<0.05 & Upregulated
1139.67	-1.57111	0.211255	-7.43704	1.02965e-13	1.26571e-12	ADAM22	padj<0.05 & Downregulated
3022.66	-1.59561	0.157075	-10.1583	3.04254e-24	6.92357e-23	ADAM23	padj<0.05 & Downregulated
12.8322	0.897721	0.703435	1.27619	0.201887	0.315585	ADAM28	N.S.
0.592461	-0.00952929	3.02099	-0.00315436	0.997483	NA	ADAM29	N.S.
0.115843	0.776761	3.53381	0.219808	0.826021	NA	ADAM30	N.S.
30.4812	0.00525423	0.557283	0.0094283	0.992477	0.99549	ADAM32	N.S.
0.484215	1.3014	3.13116	0.41563	0.677681	NA	ADAM33	N.S.
138.126	-3.23206	0.379297	-8.52118	1.5794e-17	2.4892e-16	ADAM7	padj<0.05 & Downregulated
409.535	0.200445	0.268248	0.747237	0.45492	0.581187	ADAM8	N.S.
14224.5	0.888112	0.241707	3.67433	0.000238473	0.000927863	ADAM9	padj<0.05 & Upregulated
0	NA	NA	NA	NA	NA	ADAMDEC1	N.S.
6725.96	0.0166515	0.147685	0.11275	0.910228	0.94157	ADAMTS1	N.S.
467.721	0.387088	0.326489	1.18561	0.235777	0.354479	ADAMTS10	N.S.
21.7473	5.10276	0.928968	5.49294	3.95305e-08	2.76618e-07	ADAMTS12	padj<0.05 & Upregulated
668.86	0.186704	0.279454	0.668103	0.504068	0.625768	ADAMTS13	N.S.
203.46	2.60084	0.289088	8.99671	2.32582e-19	4.10754e-18	ADAMTS14	padj<0.05 & Upregulated
1726.07	3.7344	0.15181	24.5992	1.28944e-133	3.21089e-131	ADAMTS15	padj<0.05 & Upregulated
25.42	6.52169	1.11982	5.82389	5.74928e-09	4.48192e-08	ADAMTS16	padj<0.05 & Upregulated
98.9485	0.944902	0.254749	3.70915	0.000207955	0.000819918	ADAMTS17	padj<0.05 & Upregulated
3.46536	2.67133	1.41228	1.8915	0.0585571	0.115818	ADAMTS18	N.S.
4.71534	-1.0753	0.948148	-1.1341	0.256751	0.379563	ADAMTS19	N.S.
446.969	0.148027	0.163622	0.904685	0.365632	0.495786	ADAMTS2	N.S.
0.817573	1.09718	2.4336	0.450847	0.6521	0.751301	ADAMTS20	N.S.
531.553	-0.499848	0.289655	-1.72567	0.0844072	0.156755	ADAMTS3	N.S.
34.6769	2.46202	0.543307	4.53154	5.85545e-06	3.02868e-05	ADAMTS4	padj<0.05 & Upregulated
196.093	0.0108164	0.274797	0.0393613	0.968602	0.980642	ADAMTS5	N.S.
123.889	-0.310955	0.29252	-1.06302	0.287772	0.414352	ADAMTS6	N.S.
3291.71	-0.644433	0.193487	-3.33062	0.000866517	0.00295593	ADAMTS7	padj<0.05 & Downregulated
27.9675	-0.0231874	0.448181	-0.0517366	0.958739	0.974244	ADAMTS8	N.S.
28.4328	0.454436	0.505887	0.898295	0.369028	0.499131	ADAMTS9	N.S.
819.062	0.29466	0.307531	0.958145	0.33799	0.467691	ADAMTSL1	N.S.
0.351126	1.97631	3.49265	0.56585	0.571496	NA	ADAMTSL2	N.S.
7401.83	-0.725367	0.200432	-3.61901	0.000295729	0.00112822	ADAMTSL3	padj<0.05 & Downregulated
2005.11	1.07158	0.320737	3.341	0.000834758	0.00286149	ADAMTSL4	padj<0.05 & Upregulated
1149.78	0.0229956	0.234713	0.0979733	0.921954	0.949573	ADAMTSL5	N.S.
1775.5	-0.337544	0.150658	-2.24047	0.0250606	0.0567683	ADAP1	N.S.
1077.78	-0.725912	0.230819	-3.14493	0.00166125	0.00529481	ADAP2	padj<0.05 & Downregulated
40353.9	0.514298	0.130792	3.93218	8.41779e-05	0.000356662	ADAR	padj<0.05 & Upregulated
1107.83	-0.341316	0.127252	-2.68222	0.00731363	0.0196917	ADARB1	padj<0.05 & Downregulated
4.15957	4.08482	1.71564	2.38092	0.0172693	0.0412245	ADARB2	padj<0.05 & Upregulated
775.735	-0.117944	0.132617	-0.88936	0.373809	0.50374	ADAT1	N.S.
723.737	-0.732578	0.114829	-6.37971	1.77422e-10	1.62685e-09	ADAT2	padj<0.05 & Downregulated
938.358	-0.327657	0.127596	-2.56792	0.010231	0.0263733	ADAT3	padj<0.05 & Downregulated
762.886	0.0413583	0.120679	0.342714	0.731814	0.814419	ADCK1	N.S.
3272.94	-0.373574	0.119401	-3.12874	0.00175556	0.00555376	ADCK2	padj<0.05 & Downregulated
2889.04	0.183409	0.13141	1.3957	0.162804	0.265741	ADCK3	N.S.
2616.54	-0.71573	0.135139	-5.29627	1.18192e-07	7.74804e-07	ADCK4	padj<0.05 & Downregulated
794.156	0.24588	0.215111	1.14304	0.253022	0.374877	ADCK5	N.S.
2964.53	-0.905713	0.174461	-5.19149	2.08616e-07	1.33006e-06	ADCY1	padj<0.05 & Downregulated
7.77736	0.971799	0.725345	1.33977	0.180319	0.287991	ADCY10	N.S.
11.7363	0.919105	0.775808	1.18471	0.236134	0.354893	ADCY2	N.S.
3825.86	-0.382798	0.127605	-2.99987	0.00270098	0.00813	ADCY3	padj<0.05 & Downregulated
0.857528	-1.30535	2.39261	-0.545574	0.585359	0.697143	ADCY4	N.S.
496.978	-0.0906734	0.373556	-0.242731	0.808214	0.87124	ADCY5	N.S.
4609.46	-0.0331539	0.133328	-0.248665	0.80362	0.868169	ADCY6	N.S.
1553.8	0.0930429	0.231046	0.402703	0.687167	0.779971	ADCY7	N.S.
2.49921	0.66666	1.39569	0.477656	0.632895	0.73576	ADCY8	N.S.
2745.43	0.61846	0.08908	6.94275	3.84538e-12	4.15039e-11	ADCY9	padj<0.05 & Upregulated
12.8058	0.177236	0.584214	0.303376	0.761603	0.83624	ADCYAP1	N.S.
75.2427	-1.09936	0.483445	-2.27401	0.0229654	0.0526446	ADCYAP1R1	N.S.
15678.1	0.413198	0.149115	2.771	0.00558852	0.0155241	ADD1	padj<0.05 & Upregulated
3833.09	-0.999584	0.296358	-3.37289	0.000743835	0.00257923	ADD2	padj<0.05 & Downregulated
11443.2	-0.079506	0.142699	-0.557158	0.577419	0.690045	ADD3	N.S.
1.96364	-1.7235	1.83515	-0.939161	0.347648	0.478019	ADGB	N.S.
49.9099	-0.959973	0.450441	-2.13119	0.0330738	0.0715276	ADGRA1	N.S.
997.138	-0.250969	0.131521	-1.9082	0.0563654	0.112209	ADGRA2	N.S.
4172.68	-0.616153	0.201537	-3.05727	0.00223359	0.00688971	ADGRA3	padj<0.05 & Downregulated
2737.49	-0.867591	0.261565	-3.31692	0.000910146	0.00308773	ADGRB1	padj<0.05 & Downregulated
3640.4	0.337514	0.180079	1.87426	0.0608949	0.119701	ADGRB2	N.S.
30.2749	-0.623415	0.508959	-1.22488	0.22062	0.337276	ADGRB3	N.S.
17.1035	2.81338	0.623099	4.51514	6.32759e-06	3.25166e-05	ADGRD1	padj<0.05 & Upregulated
0.115843	0.776761	3.53381	0.219808	0.826021	NA	ADGRD2	N.S.
16.0138	3.31491	0.625162	5.30248	1.14239e-07	7.49454e-07	ADGRE1	padj<0.05 & Upregulated
28.7101	-0.458828	0.512847	-0.894668	0.370964	0.500835	ADGRE2	N.S.
0	NA	NA	NA	NA	NA	ADGRE3	N.S.
3747.52	-0.352427	0.179012	-1.96874	0.0489833	0.0999564	ADGRE5	N.S.
155.566	5.91453	0.60977	9.6996	3.0267e-22	6.21419e-21	ADGRF1	padj<0.05 & Upregulated
2.04281	0.0781916	1.25532	0.0622879	0.950334	0.968729	ADGRF2	N.S.
10.9294	-0.435116	0.753856	-0.577187	0.563813	0.678296	ADGRF3	N.S.
102.784	7.3624	0.742049	9.92172	3.34945e-23	7.23472e-22	ADGRF4	padj<0.05 & Upregulated
359.068	3.89384	0.32216	12.0867	1.24232e-33	4.26278e-32	ADGRF5	padj<0.05 & Upregulated
2858.75	3.62011	0.252166	14.3561	9.75715e-47	4.92976e-45	ADGRG1	padj<0.05 & Upregulated
42.9089	1.14889	0.412343	2.78625	0.00533214	0.0148949	ADGRG2	padj<0.05 & Upregulated
0.415795	-0.475032	3.519	-0.134991	0.892619	NA	ADGRG3	N.S.
0.123055	0.776761	3.53381	0.219808	0.826021	NA	ADGRG4	N.S.
2.70607	-1.3637	1.21581	-1.12163	0.262018	0.385485	ADGRG5	N.S.
990.05	-0.780821	0.17579	-4.44179	8.92127e-06	4.47759e-05	ADGRG6	padj<0.05 & Downregulated
0.277882	-0.121682	3.53381	-0.0344336	0.972531	NA	ADGRG7	N.S.
8375.85	-0.266648	0.0994228	-2.68196	0.00731915	0.0196944	ADGRL1	padj<0.05 & Downregulated
18396.2	-0.718911	0.157344	-4.56904	4.89964e-06	2.56089e-05	ADGRL2	padj<0.05 & Downregulated
45.966	-0.711033	0.289158	-2.45898	0.0139333	0.0343766	ADGRL3	padj<0.05 & Downregulated
4.981	-0.436175	0.901774	-0.483685	0.628609	0.73195	ADGRL4	N.S.
1945.16	-0.893348	0.356608	-2.50512	0.0122408	0.0307627	ADGRV1	padj<0.05 & Downregulated
0.120516	-0.665912	3.53381	-0.18844	0.850532	NA	ADH1A	N.S.
0.278406	0.0556607	3.53381	0.0157509	0.987433	NA	ADH1B	N.S.
0.116482	-0.665912	3.53381	-0.18844	0.850532	NA	ADH1C	N.S.
0.121161	-0.665912	3.53381	-0.18844	0.850532	NA	ADH4	N.S.
11334.9	-0.232474	0.0941345	-2.4696	0.0135265	0.0334962	ADH5	padj<0.05 & Downregulated
2.89806	0.307563	1.12614	0.273114	0.784766	0.855007	ADH6	N.S.
4.60427	5.67198	1.44661	3.92087	8.82311e-05	0.000372748	ADH7	padj<0.05 & Upregulated
19.689	1.01959	0.464521	2.19493	0.0281689	0.0626212	ADHFE1	N.S.
6292.96	0.717524	0.201579	3.55952	0.000371528	0.00138201	ADI1	padj<0.05 & Upregulated
0.121161	-0.665912	3.53381	-0.18844	0.850532	NA	ADIG	N.S.
0	NA	NA	NA	NA	NA	ADIPOQ	N.S.
11932.7	0.171869	0.0963175	1.7844	0.0743584	0.141423	ADIPOR1	N.S.
7865.83	-0.000907428	0.0950416	-0.00954769	0.992382	0.99549	ADIPOR2	N.S.
1.71631	2.48001	1.73568	1.42884	0.153051	0.253259	ADIRF	N.S.
2874.31	0.3888	0.147275	2.63997	0.00829141	0.0219447	ADK	padj<0.05 & Upregulated
2456.21	1.02033	0.164991	6.18415	6.24382e-10	5.45271e-09	ADM	padj<0.05 & Upregulated
8.64623	0.163774	0.656319	0.249534	0.802948	0.868034	ADM2	N.S.
262.164	-1.27865	0.247408	-5.16817	2.36391e-07	1.49892e-06	ADM5	padj<0.05 & Downregulated
4486.06	-0.196735	0.10524	-1.86939	0.0615689	0.120775	ADNP	N.S.
3910.08	-0.203742	0.108817	-1.87233	0.0611606	0.120096	ADNP2	N.S.
3019.16	-0.190265	0.0756127	-2.51631	0.011859	0.029926	ADO	padj<0.05 & Downregulated
155.848	1.37508	0.205235	6.7	2.08421e-11	2.09366e-10	ADORA1	padj<0.05 & Upregulated
17.0699	-0.281786	0.900769	-0.312828	0.754411	0.831498	ADORA2A	N.S.
1472.63	1.29686	0.168418	7.70028	1.35771e-14	1.78478e-13	ADORA2B	padj<0.05 & Upregulated
0.408039	0.983655	3.28789	0.299175	0.764807	NA	ADORA3	N.S.
5839.98	-0.166478	0.0769481	-2.1635	0.0305025	0.0669717	ADPGK	N.S.
7.12334	3.07655	0.940558	3.27099	0.00107173	0.00356781	ADPRH	padj<0.05 & Upregulated
1140.77	-0.443444	0.217184	-2.04179	0.0411723	0.0862278	ADPRHL1	N.S.
4646.05	0.650927	0.131165	4.96266	6.95333e-07	4.10442e-06	ADPRHL2	padj<0.05 & Upregulated
750.999	0.675847	0.194142	3.4812	0.00049918	0.00180523	ADPRM	padj<0.05 & Upregulated
16.7325	-1.99498	0.564326	-3.53515	0.00040755	0.00150159	ADRA1A	padj<0.05 & Downregulated
142.351	4.92144	0.314366	15.6551	3.0651e-55	1.87466e-53	ADRA1B	padj<0.05 & Upregulated
54.0345	1.91385	0.347567	5.50643	3.66176e-08	2.57891e-07	ADRA1D	padj<0.05 & Upregulated
9.1967	-0.274133	0.560777	-0.488846	0.624951	0.729347	ADRA2A	N.S.
35.5215	-0.707734	0.531193	-1.33235	0.182746	0.29128	ADRA2B	N.S.
3035.47	-0.827913	0.216626	-3.82186	0.000132447	0.000540959	ADRA2C	padj<0.05 & Downregulated
6.75396	1.98895	0.769751	2.58389	0.00976941	0.0253479	ADRB1	padj<0.05 & Upregulated
248.506	6.98002	0.458142	15.2355	2.05613e-52	1.21083e-50	ADRB2	padj<0.05 & Upregulated
0.482553	2.163	3.1191	0.693469	0.488015	NA	ADRB3	N.S.
5136.63	-0.123952	0.11505	-1.07738	0.281312	0.407136	ADRBK1	N.S.
1793.27	-0.703057	0.178295	-3.94321	8.03976e-05	0.000342141	ADRBK2	padj<0.05 & Downregulated
15394.8	-0.0444523	0.0817705	-0.543623	0.586701	0.698357	ADRM1	N.S.
6825.95	-0.369224	0.101085	-3.65261	0.000259593	0.00100243	ADSL	padj<0.05 & Downregulated
8509.85	-0.554731	0.250642	-2.21324	0.0268813	0.0602194	ADSS	N.S.
635.364	-0.824957	0.269605	-3.05987	0.00221435	0.00683762	ADSSL1	padj<0.05 & Downregulated
96.6412	10.0635	1.0977	9.16784	4.82587e-20	8.86404e-19	ADTRP	padj<0.05 & Upregulated
4.38227	0.697086	0.877037	0.794819	0.426719	0.554216	AEBP1	N.S.
3220.66	0.0985435	0.125677	0.784101	0.432981	0.56072	AEBP2	N.S.
9558.33	0.075618	0.0711056	1.06346	0.287573	0.414203	AEN	N.S.
23590.6	0.11178	0.130817	0.854481	0.392839	0.522516	AES	N.S.
229.97	-0.535398	0.320762	-1.66915	0.0950884	0.172761	AF011889.5	N.S.
8.0132	0.495127	0.629582	0.786437	0.431611	0.55932	AF111168.2	N.S.
22.9838	-0.77553	0.44154	-1.75642	0.0790164	0.148556	AF131216.1	N.S.
20.7322	4.09487	0.954101	4.29186	1.77181e-05	8.43606e-05	AF165138.7	padj<0.05 & Upregulated
4805.67	0.996627	0.101817	9.78838	1.26297e-22	2.65559e-21	AFAP1	padj<0.05 & Upregulated
948.122	-1.04126	0.212253	-4.90574	9.30769e-07	5.40988e-06	AFAP1L1	padj<0.05 & Downregulated
593.565	5.03641	0.226166	22.2686	7.44347e-110	1.25968e-107	AFAP1L2	padj<0.05 & Upregulated
1751.06	0.925015	0.124676	7.41936	1.1769e-13	1.43861e-12	AFF1	padj<0.05 & Upregulated
18.5201	-0.129523	0.675543	-0.191732	0.847952	0.899121	AFF2	N.S.
27.2789	-0.451301	0.581822	-0.775669	0.437944	0.565258	AFF3	N.S.
10644.7	0.227673	0.139286	1.63456	0.10214	0.183192	AFF4	N.S.
9877.75	-0.185542	0.116541	-1.59208	0.111367	0.196421	AFG3L2	N.S.
13.1023	-1.15764	0.587741	-1.96965	0.0488787	0.0997548	AFM	N.S.
2316.45	-0.472564	0.137681	-3.43232	0.000598435	0.0021325	AFMID	padj<0.05 & Downregulated
146.613	1.42779	0.485885	2.93855	0.00329756	0.00970288	AFP	padj<0.05 & Upregulated
3240.93	0.596912	0.153979	3.87659	0.00010593	0.000441317	AFTPH	padj<0.05 & Upregulated
1106.75	0.0356761	0.151759	0.235085	0.814143	0.87482	AGA	N.S.
2907.41	0.152941	0.122359	1.24994	0.211321	0.326584	AGAP1	N.S.
153.84	1.87856	0.273846	6.85993	6.88955e-12	7.26069e-11	AGAP14P	padj<0.05 & Upregulated
1318.92	-1.72814	0.568438	-3.04015	0.00236463	0.00723246	AGAP2	padj<0.05 & Downregulated
5181.95	0.56261	0.140089	4.01609	5.91714e-05	0.000258825	AGAP3	padj<0.05 & Upregulated
652.755	0.209845	0.160435	1.30798	0.19088	0.301407	AGAP4	N.S.
224.617	0.43172	0.178279	2.42159	0.0154528	0.0375149	AGAP5	padj<0.05 & Upregulated
1151.9	0.155478	0.125065	1.24318	0.213802	0.329454	AGAP6	N.S.
510.44	0.330915	0.195606	1.69174	0.0906955	0.166272	AGAP9	N.S.
1.19861	3.7157	2.99293	1.24149	0.214423	0.330265	AGBL1	N.S.
113.615	-0.678547	0.43129	-1.57329	0.115651	0.202421	AGBL2	N.S.
109.253	-0.061779	0.218968	-0.282138	0.777838	0.84937	AGBL3	N.S.
23.534	-1.86494	0.579808	-3.21648	0.00129772	0.00424243	AGBL4	padj<0.05 & Downregulated
5012.01	-0.460402	0.20522	-2.24346	0.0248672	0.0563742	AGBL5	N.S.
192.242	0.358137	0.237915	1.50532	0.132243	0.225132	AGER	N.S.
8003.3	0.136388	0.0994598	1.37129	0.170286	0.275475	AGFG1	N.S.
501.606	0.525038	0.132466	3.96358	7.38338e-05	0.000316682	AGFG2	padj<0.05 & Upregulated
4282.18	-0.0147757	0.0903225	-0.163589	0.870055	0.914381	AGGF1	N.S.
2723.47	-0.150364	0.101419	-1.4826	0.13818	0.233122	AGK	N.S.
2731.59	-0.402928	0.131415	-3.06607	0.00216896	0.00671053	AGL	padj<0.05 & Downregulated
13.6326	0.356068	0.500456	0.711486	0.476783	0.60123	AGMAT	N.S.
27.6718	-2.19134	0.517499	-4.23448	2.29082e-05	0.000107313	AGMO	padj<0.05 & Downregulated
3749.57	-0.158021	0.111689	-1.41484	0.157116	0.258293	AGO1	N.S.
5268.64	-0.198685	0.146667	-1.35466	0.175525	0.281989	AGO2	N.S.
2032.59	-0.277431	0.151033	-1.83689	0.0662261	0.128294	AGO3	N.S.
2020.94	0.0767907	0.0999815	0.768049	0.442458	0.569523	AGO4	N.S.
7865.62	-0.15842	0.0819268	-1.93368	0.0531524	0.106949	AGPAT1	N.S.
5696.46	-0.176545	0.104581	-1.68811	0.0913897	0.167351	AGPAT2	N.S.
3829.04	0.321142	0.0876224	3.66506	0.000247279	0.000958913	AGPAT3	padj<0.05 & Upregulated
1589.26	-0.222189	0.164756	-1.3486	0.177466	0.284425	AGPAT4	N.S.
2760.73	-0.646387	0.131361	-4.9207	8.62335e-07	5.03394e-06	AGPAT5	padj<0.05 & Downregulated
8942.29	0.785985	0.132709	5.92262	3.16859e-09	2.54759e-08	AGPS	padj<0.05 & Upregulated
3.89731	-1.84169	1.03765	-1.77487	0.0759194	0.143827	AGR2	N.S.
0.123055	0.776761	3.53381	0.219808	0.826021	NA	AGR3	N.S.
40303.6	2.0913	0.184954	11.3071	1.20963e-29	3.46793e-28	AGRN	padj<0.05 & Upregulated
0.23637	0.0537908	3.53381	0.0152217	0.987855	NA	AGRP	N.S.
5.92659	6.04289	1.29035	4.68313	2.82533e-06	1.52945e-05	AGT	padj<0.05 & Upregulated
1713.28	-0.0971248	0.161318	-0.60207	0.547128	0.663773	AGTPBP1	N.S.
3.58691	-4.48556	1.37573	-3.26049	0.00111219	0.00368988	AGTR1	padj<0.05 & Downregulated
1.11671	-1.80512	2.1857	-0.825879	0.408873	0.537243	AGTR2	N.S.
5434.62	0.301982	0.127051	2.37686	0.0174607	0.0416129	AGTRAP	padj<0.05 & Upregulated
7.83156	5.81283	1.25139	4.64511	3.399e-06	1.82189e-05	AGXT	padj<0.05 & Upregulated
0	NA	NA	NA	NA	NA	AGXT2	N.S.
8742	-0.267646	0.157048	-1.70423	0.0883388	0.162739	AHCTF1	N.S.
36189.4	-0.757763	0.109394	-6.92692	4.3011e-12	4.61086e-11	AHCY	padj<0.05 & Downregulated
9235.46	0.32257	0.0760707	4.2404	2.23125e-05	0.000104804	AHCYL1	padj<0.05 & Upregulated
1942.12	0.0753805	0.0886843	0.849987	0.395332	0.524831	AHCYL2	N.S.
1657.6	0.472564	0.09783	4.83046	1.36219e-06	7.7092e-06	AHDC1	padj<0.05 & Upregulated
840.511	-0.189173	0.145956	-1.2961	0.194942	0.30671	AHI1	N.S.
31618.9	0.856275	0.126095	6.7907	1.11592e-11	1.14963e-10	AHNAK	padj<0.05 & Upregulated
6049.69	3.10659	0.182119	17.058	3.04565e-65	2.32845e-63	AHNAK2	padj<0.05 & Upregulated
755.487	1.18727	0.365341	3.24975	0.00115505	0.00382404	AHR	padj<0.05 & Upregulated
886.379	-0.210633	0.243573	-0.864766	0.387167	0.516826	AHRR	N.S.
16190.7	-0.129918	0.127452	-1.01934	0.30804	0.435973	AHSA1	N.S.
4084.44	0.0192622	0.157452	0.122337	0.902632	0.936757	AHSA2	N.S.
13.9602	-0.832046	0.67023	-1.24143	0.214446	0.330271	AHSG	N.S.
0.123055	0.776761	3.53381	0.219808	0.826021	NA	AHSP	N.S.
11.8324	1.20717	0.560072	2.15538	0.0311321	0.0681053	AICDA	N.S.
9101.7	0.00658712	0.0823253	0.0800132	0.936227	0.959342	AIDA	N.S.
0	NA	NA	NA	NA	NA	AIF1	N.S.
1607.32	0.447114	0.20979	2.13124	0.0330694	0.0715276	AIF1L	N.S.
10827.1	-0.497691	0.141521	-3.51672	0.000436911	0.00160029	AIFM1	padj<0.05 & Downregulated
95.7669	0.767621	0.299782	2.5606	0.0104492	0.0268801	AIFM2	padj<0.05 & Upregulated
76.571	-0.172414	0.392344	-0.439447	0.660338	0.757758	AIFM3	N.S.
2221.34	-0.117106	0.180069	-0.65034	0.515473	0.636078	AIG1	N.S.
270.343	3.9807	0.333415	11.9392	7.39588e-33	2.47443e-31	AIM1	padj<0.05 & Upregulated
437.351	2.89775	0.270515	10.712	8.94394e-27	2.28595e-25	AIM1L	padj<0.05 & Upregulated
6.26013	2.88566	1.19583	2.41311	0.015817	0.038266	AIM2	padj<0.05 & Upregulated
4252.68	0.0745189	0.179018	0.416264	0.677217	0.771843	AIMP1	N.S.
3288.91	0.114876	0.157728	0.728317	0.46642	0.591586	AIMP2	N.S.
3814.96	-0.201399	0.102998	-1.95536	0.0505407	0.10263	AIP	N.S.
1.03283	2.05618	2.18476	0.941144	0.346631	0.476922	AIPL1	N.S.
0	NA	NA	NA	NA	NA	AIRE	N.S.
0	NA	NA	NA	NA	NA	AJ239318.1	N.S.
107.88	3.35231	0.3495	9.59174	8.66103e-22	1.7413e-20	AJAP1	padj<0.05 & Upregulated
9022.55	0.669762	0.196359	3.41091	0.00064746	0.00228182	AJUBA	padj<0.05 & Upregulated
5941.34	0.157887	0.1735	0.910015	0.362814	0.493462	AK1	N.S.
12184.9	-0.181104	0.0786185	-2.30358	0.0212462	0.049287	AK2	padj<0.05 & Downregulated
8472.61	0.295371	0.115194	2.56411	0.0103441	0.0266216	AK3	padj<0.05 & Upregulated
5031.59	0.911332	0.137809	6.61302	3.76566e-11	3.65474e-10	AK4	padj<0.05 & Upregulated
24.7547	1.06721	0.610196	1.74896	0.0802985	0.150439	AK5	N.S.
4028.14	-0.139555	0.127793	-1.09203	0.274818	0.399496	AK6	N.S.
233.199	-0.737642	0.197109	-3.74231	0.000182334	0.000726628	AK7	padj<0.05 & Downregulated
58.8571	0.0874632	0.342302	0.255515	0.798326	0.8647	AK8	N.S.
319.234	-0.0134855	0.191014	-0.0705997	0.943716	0.964015	AK9	N.S.
3236.62	-0.263061	0.129903	-2.02506	0.0428615	0.0892295	AKAP1	N.S.
2430.17	0.0716105	0.110187	0.649902	0.515756	0.636221	AKAP10	N.S.
2519.96	0.0196347	0.160044	0.122683	0.902358	0.936641	AKAP11	N.S.
10459.5	1.21653	0.142455	8.53974	1.34525e-17	2.13367e-16	AKAP12	padj<0.05 & Upregulated
9432.63	0.875796	0.212857	4.11449	3.88036e-05	0.00017532	AKAP13	padj<0.05 & Upregulated
0.276402	0.4971	3.53356	0.14068	0.888123	NA	AKAP14	N.S.
2954.23	0.0885753	0.0929273	0.953167	0.340505	0.4705	AKAP17A	N.S.
5205.16	1.70739	0.35208	4.84943	1.23816e-06	7.05305e-06	AKAP2	padj<0.05 & Upregulated
67.0053	0.198879	0.300774	0.661223	0.508469	0.629724	AKAP3	N.S.
0.241032	-1.39026	3.53066	-0.393767	0.693753	NA	AKAP4	N.S.
316.721	-1.01741	0.203733	-4.99382	5.9198e-07	3.53142e-06	AKAP5	padj<0.05 & Downregulated
834.183	2.52518	0.278284	9.0741	1.14617e-19	2.06394e-18	AKAP6	padj<0.05 & Upregulated
369.726	0.0467602	0.172779	0.270636	0.786671	0.85628	AKAP7	N.S.
2829.54	-0.104298	0.0732664	-1.42355	0.154577	0.255232	AKAP8	N.S.
6872.72	0.271097	0.0886626	3.05763	0.00223097	0.00688284	AKAP8L	padj<0.05 & Upregulated
3246.54	0.371237	0.139276	2.66548	0.00768779	0.020553	AKAP9	padj<0.05 & Upregulated
2566.3	0.126707	0.0647985	1.9554	0.0505354	0.10263	AKIP1	N.S.
11516.3	-0.27636	0.101604	-2.71999	0.00652846	0.0178226	AKIRIN1	padj<0.05 & Downregulated
4115.87	0.791191	0.143943	5.49657	3.87251e-08	2.71592e-07	AKIRIN2	padj<0.05 & Upregulated
465.278	-0.0609296	0.153838	-0.396063	0.692058	0.783482	AKNA	N.S.
1.61012	3.00575	2.14875	1.39884	0.161862	0.26445	AKNAD1	N.S.
8224.02	-0.275537	0.0906512	-3.03953	0.00236949	0.00724607	AKR1A1	padj<0.05 & Downregulated
6880.38	0.167334	0.190999	0.876101	0.380975	0.510672	AKR1B1	N.S.
83.2792	4.82194	0.5427	8.88509	6.38666e-19	1.09819e-17	AKR1B10	padj<0.05 & Upregulated
11.4521	6.98217	1.15617	6.03905	1.55026e-09	1.29295e-08	AKR1B15	padj<0.05 & Upregulated
415.482	4.76343	0.648042	7.3505	1.97463e-13	2.36237e-12	AKR1C1	padj<0.05 & Upregulated
395.901	6.44591	0.782686	8.23563	1.7862e-16	2.63858e-15	AKR1C2	padj<0.05 & Upregulated
1256.74	6.09149	0.632819	9.62597	6.21195e-22	1.25908e-20	AKR1C3	padj<0.05 & Upregulated
0.806484	3.1543	3.30901	0.953246	0.340465	0.4705	AKR1C4	N.S.
116.208	6.70036	1.04366	6.42008	1.36198e-10	1.26415e-09	AKR1D1	padj<0.05 & Upregulated
631.484	-0.739021	0.27537	-2.68374	0.00728031	0.0196201	AKR1E2	padj<0.05 & Downregulated
4352.56	-0.191071	0.132774	-1.43907	0.150132	0.249162	AKR7A2	N.S.
55.4994	-0.113384	0.287284	-0.394675	0.693083	0.784489	AKR7A3	N.S.
12219.6	0.126142	0.0878729	1.4355	0.151143	0.250411	AKT1	N.S.
10177.8	0.0521346	0.110087	0.473576	0.635803	0.738205	AKT1S1	N.S.
7690.82	-0.0422218	0.150707	-0.280158	0.779357	0.850549	AKT2	N.S.
4957.89	0.296524	0.2016	1.47085	0.141332	0.237176	AKT3	N.S.
2584.93	-0.246764	0.144859	-1.70348	0.0884785	0.162927	AKTIP	N.S.
0.382835	-0.725674	3.52639	-0.205784	0.83696	NA	AL008723.1	N.S.
7.6561	-0.0332967	1.21199	-0.0274728	0.978083	0.986701	AL021546.6	N.S.
0.479969	-1.23253	3.14556	-0.391831	0.695183	NA	AL022578.1	N.S.
14.0149	0.731104	0.530185	1.37896	0.167907	0.272639	AL023806.1	N.S.
0.157233	0.776761	3.53381	0.219808	0.826021	NA	AL023875.1	N.S.
0.120516	-0.665912	3.53381	-0.18844	0.850532	NA	AL049794.1	N.S.
0	NA	NA	NA	NA	NA	AL049872.1	N.S.
5.69537	-1.85354	1.0567	-1.75408	0.079416	0.149114	AL109927.1	N.S.
0.240716	1.4932	3.52645	0.42343	0.671982	NA	AL133335.1	N.S.
0	NA	NA	NA	NA	NA	AL133475.1	N.S.
1.94494	-1.58146	1.69762	-0.931575	0.351556	0.481624	AL135745.1	N.S.
0	NA	NA	NA	NA	NA	AL135842.1	N.S.
13.5045	-0.936127	0.783244	-1.19519	0.232012	0.350147	AL136097.1	N.S.
0	NA	NA	NA	NA	NA	AL137164.1	N.S.
5.59381	-0.938225	0.77211	-1.21514	0.224311	0.341243	AL137860.1	N.S.
0	NA	NA	NA	NA	NA	AL138706.2	N.S.
0	NA	NA	NA	NA	NA	AL138751.1	N.S.
0	NA	NA	NA	NA	NA	AL139333.1	N.S.
0	NA	NA	NA	NA	NA	AL158839.1	N.S.
0	NA	NA	NA	NA	NA	AL162426.1	N.S.
257.622	-0.402012	0.185181	-2.17091	0.0299378	0.0659562	AL354822.1	N.S.
0	NA	NA	NA	NA	NA	AL354828.1	N.S.
0	NA	NA	NA	NA	NA	AL354828.2	N.S.
0	NA	NA	NA	NA	NA	AL356131.3	N.S.
0	NA	NA	NA	NA	NA	AL356135.1	N.S.
0.43761	2.25522	3.47372	0.649223	0.516194	NA	AL356289.1	N.S.
1.34312	0.227618	1.58293	0.143796	0.885662	0.925482	AL356585.2	N.S.
1.34312	0.227618	1.58293	0.143796	0.885662	0.925482	AL356585.3	N.S.
0	NA	NA	NA	NA	NA	AL357140.1	N.S.
22.1353	0.831375	0.427465	1.94489	0.0517877	0.104735	AL358852.1	N.S.
0.157233	0.776761	3.53381	0.219808	0.826021	NA	AL360294.1	N.S.
65.2979	0.0604812	0.28768	0.210237	0.833482	0.888915	AL365181.2	N.S.
0	NA	NA	NA	NA	NA	AL365202.1	N.S.
0	NA	NA	NA	NA	NA	AL365273.1	N.S.
0	NA	NA	NA	NA	NA	AL445183.1	N.S.
0	NA	NA	NA	NA	NA	AL513412.1	N.S.
1057.85	0.0429697	0.16513	0.260218	0.794696	0.862053	AL513523.1	N.S.
1055.41	0.0358168	0.164948	0.21714	0.828099	0.884798	AL513523.2	N.S.
2793.28	0.50118	0.126988	3.94667	7.92454e-05	0.000337981	AL589743.1	padj<0.05 & Upregulated
0.982162	1.56886	2.28916	0.685343	0.493127	0.615738	AL590235.1	N.S.
0	NA	NA	NA	NA	NA	AL591806.1	N.S.
87.141	-0.0426574	0.241645	-0.176529	0.859879	0.907736	AL592183.1	N.S.
0	NA	NA	NA	NA	NA	AL596220.1	N.S.
0.231685	1.45717	3.52932	0.412876	0.679698	NA	AL645728.1	N.S.
0	NA	NA	NA	NA	NA	AL645922.1	N.S.
0	NA	NA	NA	NA	NA	AL662852.1	N.S.
45.9482	-1.41502	0.313485	-4.51385	6.36606e-06	3.2695e-05	AL928654.7	padj<0.05 & Downregulated
0	NA	NA	NA	NA	NA	AL929561.1	N.S.
2712.93	0.00181099	0.102517	0.0176653	0.985906	0.991595	ALAD	N.S.
11199.1	0.377492	0.1749	2.15833	0.0309019	0.0677124	ALAS1	N.S.
1.42558	-0.894242	1.5412	-0.580223	0.561764	0.676584	ALAS2	N.S.
1.98086	1.8272	1.32388	1.38018	0.167531	0.27208	ALB	N.S.
90527.3	-0.783968	0.290389	-2.69972	0.00693989	0.0188045	ALCAM	padj<0.05 & Downregulated
1497.13	0.141953	0.169833	0.835841	0.403244	0.532177	ALDH16A1	N.S.
8249.13	-0.396202	0.107983	-3.66913	0.000243373	0.000944607	ALDH18A1	padj<0.05 & Downregulated
75173.5	0.245445	0.236433	1.03811	0.299217	0.427065	ALDH1A1	N.S.
27.3687	2.00444	0.416139	4.81676	1.45904e-06	8.21997e-06	ALDH1A2	padj<0.05 & Upregulated
1792.24	0.754593	0.167008	4.51829	6.23399e-06	3.21208e-05	ALDH1A3	padj<0.05 & Upregulated
4213.6	0.0908948	0.0812475	1.11874	0.263251	0.386876	ALDH1B1	N.S.
12.0284	2.13798	0.803974	2.65926	0.00783119	0.0208852	ALDH1L1	padj<0.05 & Upregulated
2620.61	-0.0338432	0.183294	-0.184639	0.853513	0.90293	ALDH1L2	N.S.
58.6404	0.812193	0.330871	2.45471	0.0140998	0.0347088	ALDH2	padj<0.05 & Upregulated
60.5952	0.557063	0.376922	1.47793	0.139428	0.234727	ALDH3A1	N.S.
4488.92	0.26753	0.115412	2.31805	0.0204464	0.0476408	ALDH3A2	padj<0.05 & Upregulated
2360.12	2.89329	0.232601	12.4388	1.6083e-35	5.86491e-34	ALDH3B1	padj<0.05 & Upregulated
0.635422	-2.75486	2.86581	-0.961287	0.336408	0.465909	ALDH3B2	N.S.
4420.65	0.686524	0.151726	4.52477	6.04599e-06	3.11798e-05	ALDH4A1	padj<0.05 & Upregulated
2978.14	-0.0766862	0.0889472	-0.862154	0.388603	0.518226	ALDH5A1	N.S.
795.387	2.01287	0.300214	6.70479	2.01696e-11	2.02871e-10	ALDH6A1	padj<0.05 & Upregulated
3445.58	-0.681008	0.156328	-4.35628	1.32289e-05	6.4646e-05	ALDH7A1	padj<0.05 & Downregulated
68.0816	0.0535288	0.434944	0.123071	0.902051	0.936433	ALDH8A1	N.S.
5772.71	0.0741676	0.0739361	1.00313	0.315798	0.444355	ALDH9A1	N.S.
101979	0.647956	0.199361	3.25016	0.00115338	0.00381926	ALDOA	padj<0.05 & Upregulated
2.68579	-0.147948	1.29577	-0.114177	0.909097	0.94089	ALDOB	N.S.
88.6781	0.109103	0.311174	0.350616	0.725877	0.809858	ALDOC	N.S.
2499.57	-0.36911	0.0946766	-3.89864	9.67349e-05	0.000406114	ALG1	padj<0.05 & Downregulated
316.962	-0.921565	0.195509	-4.71366	2.43304e-06	1.32573e-05	ALG10	padj<0.05 & Downregulated
854.924	-0.863091	0.144656	-5.96649	2.42406e-09	1.97725e-08	ALG10B	padj<0.05 & Downregulated
718.473	-0.240077	0.183397	-1.30906	0.190514	0.300965	ALG11	N.S.
2734.31	-0.20033	0.123576	-1.62111	0.104995	0.187517	ALG12	N.S.
3317.16	-0.356562	0.100987	-3.53075	0.000414377	0.00152479	ALG13	padj<0.05 & Downregulated
618.672	0.707763	0.178388	3.96754	7.26168e-05	0.000312	ALG14	padj<0.05 & Upregulated
1.45757	-0.147286	1.7653	-0.0834338	0.933507	0.957777	ALG1L	N.S.
2.03061	0.992591	1.51998	0.65303	0.513737	0.634517	ALG1L2	N.S.
4672.19	0.124779	0.123206	1.01277	0.311172	0.439407	ALG2	N.S.
3531.65	-0.0851129	0.153483	-0.554542	0.579208	0.691803	ALG3	N.S.
2555.35	-0.0391992	0.179617	-0.218237	0.827244	0.88421	ALG5	N.S.
1526.84	-0.159034	0.0901107	-1.76487	0.0775849	0.146314	ALG6	N.S.
2787.07	-0.566424	0.136712	-4.14321	3.42485e-05	0.000156402	ALG8	padj<0.05 & Downregulated
1591.06	0.0470328	0.190352	0.247084	0.804843	0.869158	ALG9	N.S.
6.69422	3.29859	1.00711	3.2753	0.00105549	0.00352254	ALK	padj<0.05 & Upregulated
1341.91	-0.024031	0.104674	-0.229579	0.818419	0.877737	ALKBH1	N.S.
2657.39	-0.963241	0.116604	-8.26078	1.44729e-16	2.15253e-15	ALKBH2	padj<0.05 & Downregulated
1407.3	0.126881	0.157765	0.804242	0.421257	0.549539	ALKBH3	N.S.
1702.26	-0.561492	0.145672	-3.85451	0.000115962	0.000479671	ALKBH4	padj<0.05 & Downregulated
9182.31	0.0919845	0.116812	0.787458	0.431014	0.558712	ALKBH5	N.S.
999.543	0.00700231	0.120158	0.0582759	0.953529	0.970882	ALKBH6	N.S.
2569.88	-0.0238729	0.160553	-0.148691	0.881797	0.922495	ALKBH7	N.S.
1119.43	-0.233333	0.114345	-2.04061	0.0412896	0.0864145	ALKBH8	N.S.
0.355377	0.764228	3.42326	0.223245	0.823345	NA	ALLC	N.S.
1442.83	0.214514	0.158129	1.35658	0.174914	0.281293	ALMS1	N.S.
19.2683	-0.497763	0.497866	-0.999793	0.317411	0.446121	ALOX12	N.S.
122.232	-0.559471	0.22234	-2.51629	0.0118598	0.029926	ALOX12B	padj<0.05 & Downregulated
5.65795	-0.465428	1.01251	-0.459678	0.645748	0.746217	ALOX15	N.S.
0.984512	-0.593054	1.78532	-0.332183	0.739751	0.820461	ALOX15B	N.S.
10.0423	6.78938	1.26259	5.37735	7.55912e-08	5.09722e-07	ALOX5	padj<0.05 & Upregulated
3.38481	5.21666	1.5213	3.42908	0.00060562	0.00215264	ALOX5AP	padj<0.05 & Upregulated
97.4591	1.99627	0.323547	6.16994	6.83143e-10	5.93612e-09	ALOXE3	padj<0.05 & Upregulated
0.728041	2.11404	2.7988	0.755338	0.450046	0.576566	ALPI	N.S.
180.729	3.19496	0.372648	8.57367	1.00234e-17	1.61031e-16	ALPK1	padj<0.05 & Upregulated
403.824	6.61959	0.356172	18.5854	4.22046e-77	4.10988e-75	ALPK2	padj<0.05 & Upregulated
66.2065	1.05057	0.580459	1.8099	0.0703116	0.134844	ALPK3	N.S.
1990.98	2.5375	0.250218	10.1412	3.62688e-24	8.21041e-23	ALPL	padj<0.05 & Upregulated
70.2786	6.72142	0.717419	9.3689	7.32938e-21	1.40858e-19	ALPP	padj<0.05 & Upregulated
15.1307	4.02421	0.808852	4.97521	6.51753e-07	3.86156e-06	ALPPL2	padj<0.05 & Upregulated
4614.16	-0.188133	0.114966	-1.63642	0.101751	0.182641	ALS2	N.S.
5543.87	1.93218	0.184833	10.4537	1.40979e-25	3.43694e-24	ALS2CL	padj<0.05 & Upregulated
1.71539	1.23488	1.507	0.819428	0.412542	0.540923	ALS2CR11	N.S.
10.1536	0.171057	0.741407	0.230719	0.817533	0.877165	ALS2CR12	N.S.
1.93906	-1.14315	1.2723	-0.898485	0.368927	0.499051	ALX1	N.S.
1.52475	1.01479	1.79034	0.566815	0.57084	0.684435	ALX3	N.S.
288.523	-0.543466	0.267646	-2.03054	0.0423016	0.088276	ALX4	N.S.
8600.53	-0.639301	0.0746163	-8.56785	1.05434e-17	1.68763e-16	ALYREF	padj<0.05 & Downregulated
1131.02	-0.348	0.176297	-1.97394	0.0483883	0.098916	AMACR	N.S.
187.662	1.5033	0.537077	2.79904	0.00512551	0.0143823	AMBN	padj<0.05 & Upregulated
1.71827	4.24537	2.17241	1.95422	0.0506754	0.102891	AMBP	N.S.
4049.4	0.125767	0.0848532	1.48217	0.138295	0.23323	AMBRA1	N.S.
7124.14	0.185692	0.146415	1.26826	0.204706	0.318982	AMD1	N.S.
134.519	-0.702267	0.308522	-2.27623	0.0228321	0.0524079	AMDHD1	N.S.
1679.46	-0.32185	0.225525	-1.42712	0.153546	0.253933	AMDHD2	N.S.
2.99069	-0.183346	1.02189	-0.179418	0.857609	0.906116	AMELX	N.S.
0	NA	NA	NA	NA	NA	AMELY	N.S.
889.567	-0.468079	0.149653	-3.12777	0.00176137	0.00556619	AMER1	padj<0.05 & Downregulated
0.241677	-1.39291	3.53047	-0.394541	0.693182	NA	AMER2	N.S.
1.38436	-2.52254	1.87263	-1.34705	0.177963	0.285013	AMER3	N.S.
8752.5	0.327295	0.104317	3.1375	0.00170398	0.00541415	AMFR	padj<0.05 & Upregulated
640.194	0.0875587	0.206469	0.424077	0.67151	0.767144	AMH	N.S.
2.68602	0.866739	1.52139	0.569703	0.568879	0.682741	AMHR2	N.S.
1105.23	0.00227081	0.213351	0.0106435	0.991508	0.995047	AMIGO1	N.S.
6179.33	0.685053	0.149457	4.58361	4.57027e-06	2.39664e-05	AMIGO2	padj<0.05 & Upregulated
157.724	0.53065	0.426246	1.24494	0.213154	0.32863	AMIGO3	N.S.
1242.84	-0.214653	0.1204	-1.78283	0.0746134	0.141803	AMMECR1	N.S.
6035.07	0.107881	0.127799	0.844147	0.398587	0.527826	AMMECR1L	N.S.
39.6473	0.0970715	0.403809	0.24039	0.810028	0.872442	AMN	N.S.
921.655	-0.143442	0.129177	-1.11043	0.266814	0.390952	AMN1	N.S.
479.924	-0.362508	0.234704	-1.54453	0.12246	0.211976	AMOT	N.S.
3054.47	0.626757	0.184206	3.40249	0.00066776	0.00234388	AMOTL1	padj<0.05 & Upregulated
14200.3	1.44012	0.1499	9.60725	7.4511e-22	1.49977e-20	AMOTL2	padj<0.05 & Upregulated
0.706091	-0.91869	2.9005	-0.316735	0.751444	0.829067	AMPD1	N.S.
5178.35	-0.255403	0.0940704	-2.71502	0.0066271	0.0180608	AMPD2	padj<0.05 & Downregulated
52.5079	2.20234	0.388158	5.67381	1.39659e-08	1.04346e-07	AMPD3	padj<0.05 & Upregulated
34.3342	-0.37033	0.397509	-0.931628	0.351529	0.481624	AMPH	N.S.
546.329	-0.228102	0.240078	-0.950116	0.342053	0.472253	AMT	N.S.
187.837	10.2288	1.11088	9.20789	3.32608e-20	6.17432e-19	AMTN	padj<0.05 & Upregulated
0.389347	-0.814622	3.35129	-0.243077	0.807946	NA	AMY1A	N.S.
1.04694	-0.596074	1.89925	-0.313847	0.753637	0.831118	AMY1B	N.S.
0.707187	-2.91884	3.42238	-0.852868	0.393733	0.523346	AMY1C	N.S.
0.238784	0.0561355	3.53381	0.0158853	0.987326	NA	AMY2A	N.S.
540.731	-0.908483	0.172926	-5.2536	1.49153e-07	9.68298e-07	AMY2B	padj<0.05 & Downregulated
2.14973	0.673597	1.76421	0.381812	0.702601	0.791789	AMZ1	N.S.
8018.69	-0.369315	0.080212	-4.60423	4.13991e-06	2.19073e-05	AMZ2	padj<0.05 & Downregulated
5249.58	-0.347343	0.134965	-2.57358	0.0100652	0.0259997	ANAPC1	padj<0.05 & Downregulated
979.983	-0.0323372	0.122528	-0.263917	0.791844	0.859656	ANAPC10	N.S.
6920.48	0.212093	0.139131	1.52441	0.127407	0.218628	ANAPC11	N.S.
2117.81	0.714338	0.154862	4.61275	3.97374e-06	2.11049e-05	ANAPC13	padj<0.05 & Upregulated
2118.43	-0.240936	0.195063	-1.23517	0.216768	0.333081	ANAPC15	N.S.
6724.69	0.460901	0.160289	2.87544	0.00403461	0.0116109	ANAPC16	padj<0.05 & Upregulated
3137.8	-0.0774299	0.135365	-0.572009	0.567316	0.681522	ANAPC2	N.S.
2257.43	-0.27005	0.087929	-3.07122	0.00213183	0.00660847	ANAPC4	padj<0.05 & Downregulated
9693.4	-0.235966	0.0946278	-2.49362	0.0126447	0.0316273	ANAPC5	padj<0.05 & Downregulated
5681.88	-0.107136	0.102107	-1.04925	0.294063	0.421497	ANAPC7	N.S.
1622.74	-1.72873	0.166932	-10.3559	3.93454e-25	9.34374e-24	ANG	padj<0.05 & Downregulated
2186.34	-0.100561	0.191283	-0.525716	0.599086	0.708313	ANGEL1	N.S.
2239.91	-0.000805871	0.104239	-0.007731	0.993832	0.996048	ANGEL2	N.S.
2284.75	-1.13227	0.203495	-5.5641	2.6351e-08	1.8949e-07	ANGPT1	padj<0.05 & Downregulated
17.9399	0.132641	0.422825	0.313701	0.753748	0.831139	ANGPT2	N.S.
4.64803	4.1627	1.26308	3.29567	0.000981871	0.0033066	ANGPT4	padj<0.05 & Upregulated
81.3091	-2.87875	0.594935	-4.83876	1.30651e-06	7.41333e-06	ANGPTL1	padj<0.05 & Downregulated
7.89555	3.0519	0.931908	3.27489	0.00105703	0.00352565	ANGPTL2	padj<0.05 & Upregulated
1.20975	-0.795341	2.08982	-0.380578	0.703516	0.792285	ANGPTL3	N.S.
11711.4	2.32398	0.295247	7.87131	3.50957e-15	4.79806e-14	ANGPTL4	padj<0.05 & Upregulated
0.604174	-1.65623	2.47287	-0.669761	0.50301	0.624811	ANGPTL5	N.S.
31.9989	0.0703049	0.308643	0.227787	0.819812	0.878852	ANGPTL6	N.S.
140.773	4.92477	0.532878	9.24184	2.42288e-20	4.53146e-19	ANGPTL7	padj<0.05 & Upregulated
2.47482	-0.98866	1.24949	-0.791248	0.428799	0.556628	ANGPTL8	N.S.
0.121161	-0.665912	3.53381	-0.18844	0.850532	NA	ANHX	N.S.
543.549	1.69446	0.185604	9.12944	6.88564e-20	1.25679e-18	ANK1	padj<0.05 & Upregulated
1134.53	0.307758	0.247137	1.24529	0.213024	0.328516	ANK2	N.S.
3156.26	-1.03714	0.203723	-5.09094	3.56294e-07	2.1961e-06	ANK3	padj<0.05 & Downregulated
151.892	-0.00807801	0.261635	-0.0308751	0.975369	0.984804	ANKAR	N.S.
458.711	-1.03894	0.161851	-6.41911	1.37072e-10	1.27158e-09	ANKDD1A	padj<0.05 & Downregulated
4.44774	2.03169	0.939854	2.16171	0.0306404	0.0672408	ANKDD1B	N.S.
710.145	-0.413669	0.232815	-1.77681	0.0755994	0.143365	ANKEF1	N.S.
2.7475	0.121002	1.3239	0.0913985	0.927176	0.953712	ANKFN1	N.S.
7617.78	0.379726	0.088062	4.31203	1.61764e-05	7.76137e-05	ANKFY1	padj<0.05 & Upregulated
2416.6	0.603025	0.119776	5.0346	4.78847e-07	2.89718e-06	ANKH	padj<0.05 & Upregulated
4271.82	0.080247	0.0807469	0.993809	0.320316	0.448973	ANKHD1	N.S.
3367.12	0.326135	0.113464	2.87434	0.0040487	0.0116431	ANKHD1-EIF4EBP3	padj<0.05 & Upregulated
5884.76	0.438311	0.102203	4.28864	1.79774e-05	8.55484e-05	ANKIB1	padj<0.05 & Upregulated
17.0981	0.366585	0.461428	0.794459	0.426928	0.554406	ANKK1	N.S.
124.561	0.396942	0.333993	1.18847	0.234647	0.353146	ANKLE1	N.S.
10133.6	0.811625	0.0963855	8.42061	3.74533e-17	5.79794e-16	ANKLE2	padj<0.05 & Upregulated
543.584	0.0358558	0.148958	0.240711	0.809779	0.872241	ANKMY1	N.S.
1889.84	0.479893	0.129992	3.69172	0.000222747	0.000871733	ANKMY2	padj<0.05 & Upregulated
1186.35	0.416104	0.138316	3.00836	0.00262661	0.00793354	ANKRA2	padj<0.05 & Upregulated
102268	0.279068	0.196967	1.41683	0.156533	0.257602	ANKRD1	N.S.
4507.42	1.52297	0.195545	7.78831	6.79127e-15	9.09905e-14	ANKRD10	padj<0.05 & Upregulated
10919.2	0.585206	0.12402	4.71865	2.37413e-06	1.29485e-05	ANKRD11	padj<0.05 & Upregulated
1995.42	-0.177511	0.154668	-1.14769	0.251098	0.372629	ANKRD12	N.S.
2846.3	0.601649	0.0909955	6.61185	3.79547e-11	3.67958e-10	ANKRD13A	padj<0.05 & Upregulated
5485.08	-1.31416	0.201101	-6.53483	6.36808e-11	6.03928e-10	ANKRD13B	padj<0.05 & Downregulated
2789.68	0.061188	0.107035	0.571665	0.567549	0.681622	ANKRD13C	N.S.
2301.83	-0.0459123	0.123352	-0.372206	0.70974	0.796874	ANKRD13D	N.S.
712.283	-0.813219	0.160261	-5.07432	3.88877e-07	2.38596e-06	ANKRD16	padj<0.05 & Downregulated
8419.98	0.237286	0.151272	1.5686	0.11674	0.203959	ANKRD17	N.S.
314.693	0.39976	0.214367	1.86484	0.0622035	0.121787	ANKRD18A	N.S.
139.479	-0.237974	0.391714	-0.607519	0.543507	0.660614	ANKRD18B	N.S.
282.794	5.45236	0.415649	13.1177	2.60758e-39	1.072e-37	ANKRD2	padj<0.05 & Upregulated
17.7598	1.84343	0.62558	2.94675	0.00321128	0.00948421	ANKRD20A1	padj<0.05 & Upregulated
17.1414	0.28866	0.561843	0.513773	0.607411	0.715681	ANKRD20A2	N.S.
7.78342	0.117774	1.04489	0.112714	0.910257	0.94157	ANKRD20A3	N.S.
44.8577	0.153363	0.265326	0.578017	0.563253	0.677855	ANKRD20A4	N.S.
0.601205	-2.57929	3.45979	-0.745506	0.455966	0.582224	ANKRD22	N.S.
170.788	-0.397455	0.191449	-2.07604	0.0378902	0.0803191	ANKRD23	N.S.
811.126	-0.951865	0.312578	-3.04521	0.00232522	0.00713069	ANKRD24	padj<0.05 & Downregulated
1071.83	0.0427662	0.113831	0.375698	0.707141	0.79493	ANKRD26	N.S.
3298.16	-0.34429	0.156931	-2.1939	0.0282424	0.0627366	ANKRD27	N.S.
3704.21	0.127026	0.137082	0.926645	0.354111	0.484422	ANKRD28	N.S.
263.003	0.313937	0.135225	2.32159	0.0202552	0.047246	ANKRD29	padj<0.05 & Upregulated
2.59787	-3.98226	1.8884	-2.1088	0.0349621	0.075065	ANKRD30A	N.S.
22.9509	3.89218	0.795228	4.89442	9.85954e-07	5.70969e-06	ANKRD30B	padj<0.05 & Upregulated
0.132922	-0.665912	3.53381	-0.18844	0.850532	NA	ANKRD30BL	N.S.
52.84	-0.282118	0.373252	-0.755838	0.449746	0.576351	ANKRD31	N.S.
0.6856	-1.34667	2.92092	-0.461044	0.644767	0.745365	ANKRD33	N.S.
2425.42	1.30133	0.196884	6.60965	3.85242e-11	3.73271e-10	ANKRD33B	padj<0.05 & Upregulated
295.751	-0.781029	0.306935	-2.54461	0.0109401	0.0279737	ANKRD34A	padj<0.05 & Downregulated
973.493	-1.8659	0.220787	-8.45111	2.88557e-17	4.50299e-16	ANKRD34B	padj<0.05 & Downregulated
8.39862	5.04534	1.30121	3.87743	0.000105568	0.000439911	ANKRD34C	padj<0.05 & Upregulated
3.38513	0.8334	1.04524	0.797326	0.425262	0.553024	ANKRD35	N.S.
203.907	-0.493727	0.212584	-2.3225	0.0202058	0.0471622	ANKRD36	padj<0.05 & Downregulated
246.477	-0.30758	0.264137	-1.16447	0.244233	0.364769	ANKRD36B	N.S.
112.486	0.0914365	0.205263	0.445459	0.655988	0.754306	ANKRD36C	N.S.
364.023	0.336457	0.173359	1.9408	0.0522821	0.105527	ANKRD37	N.S.
1562.82	-0.563969	0.104395	-5.40224	6.58136e-08	4.48124e-07	ANKRD39	padj<0.05 & Downregulated
5171.5	0.0160981	0.0953577	0.168818	0.86594	0.91191	ANKRD40	N.S.
1073.79	0.256984	0.0997513	2.57625	0.00998795	0.0258308	ANKRD42	padj<0.05 & Upregulated
1227.61	-0.815519	0.228077	-3.57563	0.000349384	0.00130745	ANKRD44	padj<0.05 & Downregulated
4.32764	1.7043	1.06552	1.59951	0.109708	0.193987	ANKRD45	N.S.
1151.66	0.137391	0.120387	1.14125	0.253766	0.375883	ANKRD46	N.S.
1212.24	0.0115643	0.114449	0.101043	0.919516	0.948162	ANKRD49	N.S.
2449.7	-0.442758	0.177144	-2.49943	0.0124394	0.0312257	ANKRD50	padj<0.05 & Downregulated
8245.62	0.372174	0.0668115	5.5705	2.54002e-08	1.83182e-07	ANKRD52	padj<0.05 & Upregulated
2.783	0.427029	1.41331	0.302148	0.762539	0.836911	ANKRD53	N.S.
2795.1	-0.174393	0.112418	-1.55129	0.120832	0.209723	ANKRD54	N.S.
0.120516	-0.665912	3.53381	-0.18844	0.850532	NA	ANKRD55	N.S.
1623.24	-0.153823	0.198714	-0.774091	0.438877	0.565955	ANKRD6	N.S.
0	NA	NA	NA	NA	NA	ANKRD60	N.S.
6.96284	0.248021	0.663288	0.373927	0.708459	0.795846	ANKRD61	N.S.
1.45362	3.13928	2.00972	1.56205	0.118277	0.206024	ANKRD62	N.S.
1.81397	-0.70219	1.47215	-0.476984	0.633374	0.736023	ANKRD63	N.S.
17.6581	-0.0606377	0.512392	-0.118342	0.905796	0.938868	ANKRD65	N.S.
0	NA	NA	NA	NA	NA	ANKRD66	N.S.
13.5993	-0.519493	0.694298	-0.748227	0.454323	0.580574	ANKRD7	N.S.
3368.88	0.369604	0.156048	2.36853	0.017859	0.0424171	ANKRD9	padj<0.05 & Upregulated
3037.09	0.379082	0.0908845	4.17103	3.03228e-05	0.00013935	ANKS1A	padj<0.05 & Upregulated
300.745	-0.73526	0.242332	-3.03411	0.00241249	0.00736759	ANKS1B	padj<0.05 & Downregulated
1370.32	0.143782	0.111466	1.28992	0.19708	0.309347	ANKS3	N.S.
0.396149	2.12566	3.27526	0.649007	0.516334	NA	ANKS4B	N.S.
4311.45	0.090611	0.10746	0.843204	0.399115	0.528364	ANKS6	N.S.
5.80539	2.81358	0.963049	2.92153	0.00348311	0.0101955	ANKUB1	padj<0.05 & Upregulated
4323.28	1.22999	0.176856	6.95475	3.53193e-12	3.81918e-11	ANKZF1	padj<0.05 & Upregulated
5040.51	-0.981577	0.135133	-7.26377	3.76447e-13	4.3804e-12	ANLN	padj<0.05 & Downregulated
57.9186	4.79985	0.563017	8.52523	1.52505e-17	2.4079e-16	ANO1	padj<0.05 & Upregulated
2966.6	-0.177748	0.0932919	-1.90529	0.056742	0.112869	ANO10	N.S.
55.8134	6.78814	0.91043	7.45597	8.92069e-14	1.09969e-12	ANO2	padj<0.05 & Upregulated
5.51621	1.26037	0.89478	1.40858	0.158958	0.260854	ANO3	N.S.
26.0628	3.74638	0.680495	5.50538	3.68373e-08	2.5923e-07	ANO4	padj<0.05 & Upregulated
87.6089	-0.604074	0.20679	-2.9212	0.00348686	0.0102047	ANO5	padj<0.05 & Downregulated
9875.87	0.614393	0.110118	5.5794	2.41348e-08	1.74417e-07	ANO6	padj<0.05 & Upregulated
192.275	-0.304959	0.270645	-1.12679	0.259832	0.382852	ANO7	N.S.
2845.82	-0.943091	0.126125	-7.47742	7.57935e-14	9.46387e-13	ANO8	padj<0.05 & Downregulated
32.3422	2.0942	0.626572	3.34231	0.000830834	0.00285016	ANO9	padj<0.05 & Upregulated
2179.77	-0.966652	0.228549	-4.22952	2.34191e-05	0.000109442	ANOS1	padj<0.05 & Downregulated
10204.4	-0.64133	0.108183	-5.92818	3.06307e-09	2.4673e-08	ANP32A	padj<0.05 & Downregulated
10862.7	-0.123366	0.082151	-1.5017	0.133174	0.226312	ANP32B	N.S.
0.515394	-1.22063	2.58117	-0.472898	0.636286	NA	ANP32D	N.S.
5837.91	-0.49726	0.119207	-4.17139	3.02749e-05	0.000139167	ANP32E	padj<0.05 & Downregulated
7.03791	1.07387	0.709212	1.51418	0.12998	0.222061	ANPEP	N.S.
4983.16	0.671875	0.174476	3.85082	0.000117725	0.000485927	ANTXR1	padj<0.05 & Upregulated
11290	-0.575443	0.1771	-3.24926	0.00115707	0.00382928	ANTXR2	padj<0.05 & Downregulated
56.2915	5.32956	0.71032	7.50304	6.23565e-14	7.85926e-13	ANTXRL	padj<0.05 & Upregulated
21908.8	2.64485	0.309286	8.55147	1.21535e-17	1.93468e-16	ANXA1	padj<0.05 & Upregulated
18.7711	6.26504	1.20595	5.19512	2.04583e-07	1.30578e-06	ANXA10	padj<0.05 & Upregulated
16620.4	0.68667	0.227106	3.02357	0.00249811	0.00759144	ANXA11	padj<0.05 & Upregulated
51.1583	7.69438	1.15517	6.66083	2.72285e-11	2.69212e-10	ANXA13	padj<0.05 & Upregulated
191344	1.47122	0.194178	7.57664	3.54624e-14	4.56533e-13	ANXA2	padj<0.05 & Upregulated
932.469	-2.02316	0.155011	-13.0517	6.21854e-39	2.5326e-37	ANXA2R	padj<0.05 & Downregulated
4258.52	8.0552	0.354152	22.745	1.60698e-114	2.88776e-112	ANXA3	padj<0.05 & Upregulated
11932.6	1.09108	0.124439	8.76799	1.81882e-18	3.03968e-17	ANXA4	padj<0.05 & Upregulated
37373.6	1.47104	0.177194	8.30185	1.02499e-16	1.53889e-15	ANXA5	padj<0.05 & Upregulated
7270.04	-0.367459	0.222855	-1.64887	0.0991748	0.178845	ANXA6	N.S.
9088.75	0.135054	0.0793551	1.7019	0.0887746	0.163359	ANXA7	N.S.
684.241	8.04318	0.36846	21.8292	1.22606e-105	1.94286e-103	ANXA8	padj<0.05 & Upregulated
555.895	5.86353	0.247435	23.6973	3.84451e-124	8.3767e-122	ANXA8L1	padj<0.05 & Upregulated
241.801	-0.369605	0.247692	-1.4922	0.135648	0.229861	ANXA9	N.S.
31.5197	3.99591	0.542727	7.36264	1.80304e-13	2.16452e-12	AOAH	padj<0.05 & Upregulated
44.1594	6.18206	0.742968	8.32076	8.74013e-17	1.31904e-15	AOC1	padj<0.05 & Upregulated
804.938	0.817886	0.171846	4.75941	1.94157e-06	1.071e-05	AOC2	padj<0.05 & Upregulated
379.356	0.781271	0.323064	2.41832	0.0155924	0.0378013	AOC3	padj<0.05 & Upregulated
553.917	7.57099	0.648741	11.6703	1.80844e-31	5.56943e-30	AOX1	padj<0.05 & Upregulated
90.2294	0.558064	0.554145	1.00707	0.3139	0.442578	AP000275.65	N.S.
10.3513	1.471	1.15665	1.27178	0.203453	0.317435	AP000295.9	N.S.
0.946004	1.57659	2.20752	0.71419	0.475109	0.599554	AP000304.12	N.S.
3.47278	5.26086	1.40749	3.73776	0.000185664	0.000738208	AP000322.53	padj<0.05 & Upregulated
33.4867	0.298544	0.94194	0.316946	0.751285	0.829048	AP000349.1	N.S.
33.4867	0.298544	0.94194	0.316946	0.751285	0.829048	AP000349.2	N.S.
49.6183	-0.479146	0.508408	-0.942443	0.345966	0.476376	AP000350.10	N.S.
0	NA	NA	NA	NA	NA	AP000351.1	N.S.
3.57408	0.316955	0.895344	0.354004	0.723336	0.808132	AP000687.1	N.S.
7.97224	0.122448	0.609572	0.200876	0.840796	0.894105	AP000721.4	N.S.
151.592	2.37846	1.34555	1.76765	0.07712	0.145579	AP000769.1	N.S.
6.72078	-0.511758	0.715975	-0.714771	0.474751	0.599244	AP000866.1	N.S.
0	NA	NA	NA	NA	NA	AP001888.1	N.S.
2.21301	-0.935834	1.66116	-0.563363	0.573188	0.686549	AP002884.2	N.S.
0	NA	NA	NA	NA	NA	AP002962.1	N.S.
1373.14	0.834256	0.215336	3.8742	0.000106974	0.000445238	AP003419.11	padj<0.05 & Upregulated
0	NA	NA	NA	NA	NA	AP005242.1	N.S.
60.1161	0.41297	0.311091	1.32749	0.184346	0.293345	AP006285.1	N.S.
60.1161	0.41297	0.311091	1.32749	0.184346	0.293345	AP006285.2	N.S.
2910.37	-0.100457	0.137565	-0.730253	0.465236	0.590737	AP1AR	N.S.
10586.6	0.0269708	0.0985453	0.273689	0.784324	0.854646	AP1B1	N.S.
8808.37	-0.0197937	0.151577	-0.130585	0.896104	0.93198	AP1G1	N.S.
2235.36	0.819336	0.218213	3.75475	0.000173515	0.000694497	AP1G2	padj<0.05 & Upregulated
6974.02	0.109883	0.114848	0.956777	0.33868	0.468497	AP1M1	N.S.
1435.6	0.303287	0.16414	1.84773	0.0646409	0.125754	AP1M2	N.S.
8197.63	0.250746	0.0839086	2.98833	0.00280506	0.00841422	AP1S1	padj<0.05 & Upregulated
7667.43	-0.272064	0.150609	-1.80643	0.0708516	0.135686	AP1S2	N.S.
957.397	0.271554	0.202186	1.34309	0.179241	0.286585	AP1S3	N.S.
10489.8	0.517402	0.140119	3.69258	0.000221988	0.000869535	AP2A1	padj<0.05 & Upregulated
9722.66	-0.0162264	0.0720399	-0.225241	0.821792	0.880325	AP2A2	N.S.
28699.3	-0.00689978	0.0838466	-0.0822905	0.934416	0.958275	AP2B1	N.S.
33762.1	0.378191	0.113598	3.32921	0.000870914	0.00296966	AP2M1	padj<0.05 & Upregulated
10015.2	0.0269815	0.179528	0.150291	0.880535	0.921506	AP2S1	N.S.
6677.16	-0.0887183	0.11772	-0.753641	0.451065	0.577616	AP3B1	N.S.
635.783	1.23547	0.28533	4.32999	1.49117e-05	7.20418e-05	AP3B2	padj<0.05 & Upregulated
20631.2	0.0251444	0.0700352	0.359025	0.719577	0.805334	AP3D1	N.S.
5690.84	-0.110038	0.122703	-0.896786	0.369833	0.499792	AP3M1	N.S.
2060.3	-0.00480845	0.0806298	-0.0596362	0.952445	0.970087	AP3M2	N.S.
5963.32	0.418303	0.13497	3.09923	0.00194023	0.00606641	AP3S1	padj<0.05 & Upregulated
2866.39	-0.0210107	0.172056	-0.122115	0.902808	0.936772	AP3S2	N.S.
1437.16	-0.406684	0.0972589	-4.18146	2.89649e-05	0.000133356	AP4B1	padj<0.05 & Downregulated
1733.94	0.238325	0.1747	1.36419	0.172507	0.278299	AP4E1	N.S.
1691.25	-0.761822	0.190332	-4.0026	6.26506e-05	0.000272335	AP4M1	padj<0.05 & Downregulated
811.321	-0.115482	0.106482	-1.08453	0.278132	0.403505	AP4S1	N.S.
3420.91	-0.505796	0.181039	-2.79386	0.00520835	0.0145842	AP5B1	padj<0.05 & Downregulated
2716.85	0.022397	0.1261	0.177613	0.859027	0.907223	AP5M1	N.S.
1238.22	0.298977	0.0922526	3.24085	0.00119174	0.0039321	AP5S1	padj<0.05 & Upregulated
5165.81	0.221017	0.131603	1.67942	0.0930694	0.169879	AP5Z1	N.S.
2689.07	-0.590757	0.132224	-4.46784	7.9015e-06	4.00148e-05	APAF1	padj<0.05 & Downregulated
474.552	0.55653	0.184445	3.01733	0.00255015	0.00772669	APBA1	padj<0.05 & Upregulated
3611.47	-0.216287	0.145135	-1.49025	0.136159	0.230627	APBA2	N.S.
1834.34	0.203756	0.135343	1.50548	0.1322	0.225081	APBA3	N.S.
4166.75	0.252098	0.157057	1.60513	0.108464	0.192353	APBB1	N.S.
0	NA	NA	NA	NA	NA	APBB1IP	N.S.
14278.5	-0.261612	0.130672	-2.00205	0.0452789	0.0934584	APBB2	N.S.
919.425	-0.562966	0.21411	-2.62933	0.00855521	0.0225425	APBB3	padj<0.05 & Downregulated
4020.47	-0.324904	0.163283	-1.98982	0.0466108	0.0957766	APC	N.S.
810.651	-1.11012	0.301982	-3.67611	0.000236822	0.00092226	APC2	padj<0.05 & Downregulated
2.84674	0.0664909	1.13932	0.0583603	0.953462	0.970882	APCDD1	N.S.
11.4187	6.9811	1.21229	5.75858	8.48249e-09	6.50212e-08	APCDD1L	padj<0.05 & Upregulated
0.992162	3.44235	2.54661	1.35174	0.176459	0.283097	APCS	N.S.
8179.91	-0.146835	0.151362	-0.970096	0.331998	0.461378	APEH	N.S.
11.0426	-1.43528	0.569975	-2.51815	0.0117973	0.0297942	APELA	padj<0.05 & Downregulated
15393.7	-0.4285	0.0959817	-4.46439	8.02958e-06	4.06281e-05	APEX1	padj<0.05 & Downregulated
2212.05	-0.229638	0.077246	-2.97282	0.00295081	0.00880745	APEX2	padj<0.05 & Downregulated
16291.1	-0.138682	0.140561	-0.986632	0.323823	0.452579	APH1A	N.S.
2539.95	-0.956116	0.103969	-9.19615	3.71016e-20	6.85809e-19	APH1B	padj<0.05 & Downregulated
10841.8	-0.0529744	0.114389	-0.463107	0.643288	0.744434	API5	N.S.
1302.13	-0.00455523	0.128563	-0.0354318	0.971735	0.982444	APIP	N.S.
865.895	-0.530594	0.120341	-4.40908	1.03812e-05	5.14224e-05	APITD1	padj<0.05 & Downregulated
87.6965	-0.42165	0.327671	-1.28681	0.19816	0.310791	APITD1-CORT	N.S.
389.444	0.210336	0.2909	0.723054	0.469647	0.594295	APLF	N.S.
14.686	0.472242	0.522694	0.903478	0.366272	0.496539	APLN	N.S.
57.5307	4.57116	0.459017	9.95859	2.31322e-23	5.05284e-22	APLNR	padj<0.05 & Upregulated
14175.4	-1.07564	0.1474	-7.29743	2.9331e-13	3.45686e-12	APLP1	padj<0.05 & Downregulated
64555.4	0.333461	0.107293	3.10796	0.00188386	0.00591667	APLP2	padj<0.05 & Upregulated
10121.2	-0.0836006	0.0928314	-0.900563	0.36782	0.498028	APMAP	N.S.
2513.79	7.73622	0.274033	28.231	2.43875e-175	1.37129e-172	APOA1	padj<0.05 & Upregulated
9478.72	-0.469724	0.122725	-3.82744	0.000129481	0.000529683	APOA1BP	padj<0.05 & Downregulated
7.85379	-0.369355	0.609592	-0.605904	0.544578	0.661613	APOA2	N.S.
0	NA	NA	NA	NA	NA	APOA4	N.S.
1.13993	-0.305643	1.90182	-0.160711	0.872321	0.915907	APOA5	N.S.
0.467105	-1.18602	3.48906	-0.339925	0.733913	NA	APOB	N.S.
0.347528	1.96332	3.49362	0.561975	0.574133	NA	APOBEC1	N.S.
3.99796	1.57965	1.05598	1.49591	0.134678	0.228563	APOBEC2	N.S.
0.39076	2.10806	3.28579	0.641568	0.521154	NA	APOBEC3A	N.S.
218.078	3.64595	0.193024	18.8887	1.41415e-79	1.45e-77	APOBEC3B	padj<0.05 & Upregulated
1057.82	1.63181	0.19007	8.58533	9.05793e-18	1.46193e-16	APOBEC3C	padj<0.05 & Upregulated
14.4628	0.766932	0.696111	1.10174	0.270576	0.395075	APOBEC3D	N.S.
638.476	0.387245	0.101825	3.80305	0.000142928	0.000580471	APOBEC3F	padj<0.05 & Upregulated
35.6396	2.48783	0.463253	5.37034	7.85872e-08	5.28901e-07	APOBEC3G	padj<0.05 & Upregulated
72.1372	3.96311	0.449275	8.82111	1.13328e-18	1.91788e-17	APOBEC3H	padj<0.05 & Upregulated
0	NA	NA	NA	NA	NA	APOBEC4	N.S.
36.9067	0.25496	0.307128	0.830142	0.406458	0.535038	APOBR	N.S.
912.192	-1.74863	0.194619	-8.98489	2.5899e-19	4.56005e-18	APOC1	padj<0.05 & Downregulated
0	NA	NA	NA	NA	NA	APOC2	N.S.
4.6493	4.25552	1.311	3.24601	0.00117033	0.00387023	APOC3	padj<0.05 & Upregulated
0.249301	-1.38184	3.53153	-0.391287	0.695585	NA	APOC4	N.S.
0.385945	-2.03328	3.48034	-0.584217	0.559074	NA	APOC4-APOC2	N.S.
15.3892	5.96804	1.11962	5.33044	9.79769e-08	6.4912e-07	APOD	padj<0.05 & Upregulated
23843.7	-1.36121	0.226447	-6.01115	1.84209e-09	1.5225e-08	APOE	padj<0.05 & Downregulated
0.24357	0.0550899	3.53381	0.0155894	0.987562	NA	APOF	N.S.
0	NA	NA	NA	NA	NA	APOH	N.S.
2215.46	5.96719	0.329687	18.0996	3.21115e-73	2.93056e-71	APOL1	padj<0.05 & Upregulated
10462.1	1.20349	0.135142	8.90543	5.31779e-19	9.18676e-18	APOL2	padj<0.05 & Upregulated
266.034	6.02283	0.33984	17.7225	2.81013e-70	2.38943e-68	APOL3	padj<0.05 & Upregulated
48.9931	4.77652	0.649667	7.35226	1.94883e-13	2.33311e-12	APOL4	padj<0.05 & Upregulated
0.115843	0.776761	3.53381	0.219808	0.826021	NA	APOL5	N.S.
2529.93	1.82004	0.54836	3.31907	0.000903188	0.00306771	APOL6	padj<0.05 & Upregulated
150.538	0.295291	0.225118	1.31171	0.189617	0.299847	APOLD1	N.S.
81.1005	-0.149437	0.224076	-0.666902	0.504835	0.626444	APOM	N.S.
2579.24	-0.401562	0.20498	-1.95903	0.050109	0.101955	APOO	N.S.
1675.19	0.0495908	0.130646	0.37958	0.704257	0.792812	APOOL	N.S.
2387.82	0.216069	0.145875	1.4812	0.138554	0.233476	APOPT1	N.S.
78656.4	0.993364	0.123113	8.06875	7.10244e-16	1.01561e-14	APP	padj<0.05 & Upregulated
6129.75	0.343093	0.0857052	4.00318	6.2498e-05	0.000271875	APPBP2	padj<0.05 & Upregulated
4234.84	-0.221546	0.139711	-1.58575	0.112796	0.198601	APPL1	N.S.
2098.14	0.257593	0.126679	2.03343	0.0420092	0.0877381	APPL2	N.S.
11533	-0.396397	0.120351	-3.29368	0.000988861	0.00332437	APRT	padj<0.05 & Downregulated
3067.17	-0.0521352	0.106289	-0.490507	0.623775	0.728414	APTX	N.S.
1011.33	6.38144	0.215871	29.5614	4.68541e-192	3.26686e-189	AQP1	padj<0.05 & Upregulated
0.468545	1.41381	3.15218	0.448519	0.653778	NA	AQP10	N.S.
372.466	0.181542	0.193651	0.937472	0.348516	0.478873	AQP11	N.S.
0.116482	-0.665912	3.53381	-0.18844	0.850532	NA	AQP12A	N.S.
0.121161	-0.665912	3.53381	-0.18844	0.850532	NA	AQP12B	N.S.
2.78535	3.53796	1.35313	2.61465	0.00893186	0.0234277	AQP2	padj<0.05 & Upregulated
44.3224	3.32099	0.466558	7.11807	1.0945e-12	1.23324e-11	AQP3	padj<0.05 & Upregulated
143.337	-0.854103	0.551051	-1.54995	0.121153	0.210152	AQP4	N.S.
8.14285	4.13156	1.05128	3.93002	8.4938e-05	0.000359795	AQP5	padj<0.05 & Upregulated
10.7789	-0.431282	0.570435	-0.756059	0.449614	0.576308	AQP6	N.S.
1.79685	4.32247	1.70387	2.53686	0.0111853	0.0285155	AQP7	padj<0.05 & Upregulated
2.95863	0.75548	1.01281	0.745928	0.455711	0.582026	AQP8	N.S.
4.60451	3.31375	1.08696	3.04863	0.00229885	0.00707097	AQP9	padj<0.05 & Upregulated
4236.49	-0.0374633	0.122054	-0.306941	0.758888	0.834269	AQR	N.S.
176.748	-0.709556	0.392522	-1.80768	0.0706555	0.1354	AR	N.S.
8527.29	0.253288	0.130638	1.93885	0.0525198	0.105933	ARAF	N.S.
6170.5	0.290301	0.122156	2.37649	0.0174784	0.0416496	ARAP1	padj<0.05 & Upregulated
2054.24	0.25722	0.214231	1.20067	0.22988	0.347682	ARAP2	N.S.
14.2567	3.56679	0.721358	4.94455	7.63219e-07	4.48388e-06	ARAP3	padj<0.05 & Upregulated
126.555	1.92912	0.4322	4.46349	8.06359e-06	4.07883e-05	ARC	padj<0.05 & Upregulated
16605.2	0.0240632	0.134124	0.179409	0.857616	0.906116	ARCN1	N.S.
3064.79	3.16282	0.36647	8.63051	6.10771e-18	9.96849e-17	AREG	padj<0.05 & Upregulated
5497.95	0.0822174	0.124881	0.658365	0.510303	0.631226	AREL1	N.S.
48386.5	0.0173315	0.0932642	0.185832	0.852576	0.902323	ARF1	N.S.
15685.2	-0.165129	0.114148	-1.44662	0.148004	0.246287	ARF3	N.S.
30028.7	0.0161783	0.168785	0.0958513	0.923639	0.951028	ARF4	N.S.
15858.5	-0.283781	0.149729	-1.8953	0.0580525	0.115003	ARF5	N.S.
16060.1	0.400875	0.11555	3.46929	0.000521835	0.00188169	ARF6	padj<0.05 & Upregulated
10584.4	-0.0889768	0.0969653	-0.917615	0.35882	0.489099	ARFGAP1	N.S.
5602.36	0.182271	0.0832806	2.18864	0.0286231	0.0634367	ARFGAP2	N.S.
5184.83	-0.028293	0.0579676	-0.488083	0.625491	0.729684	ARFGAP3	N.S.
5760.48	0.526614	0.112852	4.6664	3.06527e-06	1.65012e-05	ARFGEF1	padj<0.05 & Upregulated
2770.4	-0.00420532	0.135285	-0.0310849	0.975202	0.984749	ARFGEF2	N.S.
2146.87	0.350858	0.168057	2.08773	0.036822	0.0785006	ARFGEF3	N.S.
3337.98	-0.204248	0.0827024	-2.46967	0.0135236	0.0334939	ARFIP1	padj<0.05 & Downregulated
9262.58	-0.213256	0.0833193	-2.55951	0.0104821	0.0269608	ARFIP2	padj<0.05 & Downregulated
2342.32	0.130027	0.122766	1.05915	0.289533	0.416382	ARFRP1	N.S.
1.94438	-3.12477	1.71567	-1.82131	0.068559	0.132065	ARG1	N.S.
218.362	0.330637	0.269164	1.22838	0.219303	0.336177	ARG2	N.S.
0.721412	-2.94652	2.77503	-1.06179	0.288329	0.414983	ARGFX	N.S.
4084.64	0.0963052	0.109676	0.878088	0.379896	0.509679	ARGLU1	N.S.
6615.39	0.209915	0.078981	2.65779	0.00786543	0.0209552	ARHGAP1	padj<0.05 & Upregulated
1309.42	-0.0306553	0.119331	-0.256893	0.797261	0.863976	ARHGAP10	N.S.
2571.73	-1.87384	0.19646	-9.53802	1.45589e-21	2.89698e-20	ARHGAP11A	padj<0.05 & Downregulated
358.602	-1.19836	0.252694	-4.74235	2.11256e-06	1.15871e-05	ARHGAP11B	padj<0.05 & Downregulated
2317.05	0.577962	0.127421	4.53585	5.73708e-06	2.96972e-05	ARHGAP12	padj<0.05 & Upregulated
26.3546	-2.30941	0.508398	-4.54253	5.55837e-06	2.88615e-05	ARHGAP15	padj<0.05 & Downregulated
6151.96	0.506224	0.0991296	5.10669	3.27855e-07	2.03665e-06	ARHGAP17	padj<0.05 & Upregulated
315.326	2.23931	0.418059	5.35644	8.48765e-08	5.68547e-07	ARHGAP18	padj<0.05 & Upregulated
1675.51	-1.28009	0.164335	-7.78955	6.72492e-15	9.01708e-14	ARHGAP19	padj<0.05 & Downregulated
5.13242	-2.91124	1.27769	-2.27853	0.0226951	0.0521553	ARHGAP19-SLIT1	N.S.
47.5752	1.31488	0.290183	4.53119	5.86529e-06	3.03286e-05	ARHGAP20	padj<0.05 & Upregulated
5012.53	1.26328	0.131183	9.62989	5.97911e-22	1.21329e-20	ARHGAP21	padj<0.05 & Upregulated
351.943	0.0108919	0.197693	0.0550953	0.956063	0.972468	ARHGAP22	N.S.
3754.42	0.395553	0.14325	2.76127	0.00575762	0.0159481	ARHGAP23	padj<0.05 & Upregulated
10.3779	-0.305817	0.60089	-0.508941	0.610794	0.71821	ARHGAP24	N.S.
2.72307	3.13641	1.37564	2.27996	0.0226101	0.0519944	ARHGAP25	N.S.
1030	0.937845	0.11788	7.95594	1.7777e-15	2.475e-14	ARHGAP26	padj<0.05 & Upregulated
3472.16	0.775888	0.150423	5.15805	2.4953e-07	1.57821e-06	ARHGAP27	padj<0.05 & Upregulated
20.1011	1.0245	0.530922	1.92967	0.0536483	0.107766	ARHGAP28	N.S.
6983.12	7.54146	0.171545	43.962	3.55124e-300	7.73771e-297	ARHGAP29	padj<0.05 & Upregulated
98.6496	2.43953	0.33721	7.23446	4.674e-13	5.39911e-12	ARHGAP30	padj<0.05 & Upregulated
521.941	1.04258	0.275234	3.78796	0.000151891	0.000613727	ARHGAP31	padj<0.05 & Upregulated
2343.49	-0.000154417	0.203224	-0.000759838	0.999394	0.999738	ARHGAP32	N.S.
763.523	-1.37922	0.23459	-5.87929	4.1203e-09	3.26756e-08	ARHGAP33	padj<0.05 & Downregulated
7210.37	0.0290769	0.105326	0.276066	0.782497	0.85326	ARHGAP35	N.S.
15.7417	0.987052	0.543484	1.81616	0.0693461	0.13336	ARHGAP36	N.S.
2086.21	-0.369306	0.179372	-2.05888	0.0395056	0.0832272	ARHGAP39	N.S.
1368.25	-1.42421	0.356689	-3.99287	6.52794e-05	0.000282915	ARHGAP4	padj<0.05 & Downregulated
0.985997	0.95569	2.01261	0.474851	0.634893	0.737395	ARHGAP40	N.S.
1035.49	0.514239	0.1595	3.22406	0.00126385	0.00414568	ARHGAP42	padj<0.05 & Upregulated
1422.67	-0.356438	0.130484	-2.73166	0.00630162	0.0172547	ARHGAP44	padj<0.05 & Downregulated
6215.68	0.429694	0.155767	2.75857	0.00580553	0.0160603	ARHGAP5	padj<0.05 & Upregulated
13.7248	-1.01295	0.509708	-1.98731	0.0468877	0.0962661	ARHGAP6	N.S.
2028.72	0.123619	0.129148	0.957194	0.338469	0.468243	ARHGAP8	N.S.
76.9821	2.23443	0.597632	3.7388	0.000184898	0.00073533	ARHGAP9	padj<0.05 & Upregulated
32644.6	0.286094	0.116916	2.447	0.0144051	0.0353257	ARHGDIA	padj<0.05 & Upregulated
12.8265	3.03173	0.807675	3.75365	0.000174275	0.00069722	ARHGDIB	padj<0.05 & Upregulated
536.319	0.096997	0.145138	0.668307	0.503938	0.625651	ARHGDIG	N.S.
3069.61	-0.000203927	0.137693	-0.00148102	0.998818	0.999352	ARHGEF1	N.S.
5093.6	-0.271056	0.134427	-2.01637	0.0437609	0.0907873	ARHGEF10	N.S.
1350.54	0.700636	0.139139	5.03553	4.76538e-07	2.88421e-06	ARHGEF10L	padj<0.05 & Upregulated
5609.87	0.012334	0.171191	0.072048	0.942564	0.963344	ARHGEF11	N.S.
9905.16	0.318953	0.115	2.77351	0.00554554	0.0154194	ARHGEF12	padj<0.05 & Upregulated
7.45661	3.33487	0.903648	3.69046	0.000223851	0.000875663	ARHGEF15	padj<0.05 & Upregulated
1603.91	-0.0909547	0.144478	-0.629541	0.528995	0.648408	ARHGEF16	N.S.
2673.08	0.267656	0.164302	1.62905	0.103302	0.185043	ARHGEF17	N.S.
4323.88	0.606264	0.0788709	7.6868	1.50865e-14	1.98022e-13	ARHGEF18	padj<0.05 & Upregulated
173.504	-0.506293	0.3563	-1.42097	0.155325	0.256243	ARHGEF19	N.S.
6130.1	0.978017	0.173288	5.64388	1.66258e-08	1.22694e-07	ARHGEF2	padj<0.05 & Upregulated
1345.79	-0.399005	0.235381	-1.69514	0.0900482	0.165311	ARHGEF25	N.S.
5449.69	-0.801606	0.129221	-6.20338	5.52643e-10	4.84319e-09	ARHGEF26	padj<0.05 & Downregulated
241.799	4.89004	0.411919	11.8714	1.66754e-32	5.45344e-31	ARHGEF28	padj<0.05 & Upregulated
2805.8	1.96898	0.13268	14.8401	8.05985e-50	4.47425e-48	ARHGEF3	padj<0.05 & Upregulated
16.8563	0.41325	0.723993	0.570792	0.56814	0.682233	ARHGEF33	N.S.
0.123055	0.776761	3.53381	0.219808	0.826021	NA	ARHGEF35	N.S.
48.1779	2.55992	0.464073	5.51621	3.46392e-08	2.45047e-07	ARHGEF37	padj<0.05 & Upregulated
6.72387	2.30646	1.11249	2.07324	0.0381495	0.0807509	ARHGEF38	N.S.
827.958	-2.2992	0.156779	-14.6652	1.07675e-48	5.84699e-47	ARHGEF39	padj<0.05 & Downregulated
176.455	-0.71241	0.442739	-1.6091	0.107596	0.191202	ARHGEF4	N.S.
1874.57	0.269073	0.257507	1.04492	0.296062	0.423734	ARHGEF40	N.S.
5.77388	2.76982	0.974767	2.84153	0.00448983	0.0127888	ARHGEF5	padj<0.05 & Upregulated
267.736	0.0579732	0.328238	0.17662	0.859807	0.907716	ARHGEF6	N.S.
4941.53	-0.0323243	0.119025	-0.271576	0.785948	0.85565	ARHGEF7	N.S.
954.641	-0.177475	0.119772	-1.48177	0.138402	0.233338	ARHGEF9	N.S.
9167.81	-0.494382	0.167837	-2.94561	0.00322317	0.00951611	ARID1A	padj<0.05 & Downregulated
4747.01	-0.357155	0.173439	-2.05925	0.03947	0.0831824	ARID1B	N.S.
3422.5	-0.369361	0.151036	-2.44552	0.0144645	0.0354415	ARID2	padj<0.05 & Downregulated
1783.67	0.019003	0.144782	0.131252	0.895576	0.931709	ARID3A	N.S.
1719.82	-0.654702	0.161992	-4.04158	5.30925e-05	0.000234174	ARID3B	padj<0.05 & Downregulated
14.677	-0.0946475	0.470879	-0.201002	0.840697	0.894093	ARID3C	N.S.
1271.02	-0.063929	0.142547	-0.448476	0.65381	0.752745	ARID4A	N.S.
3900.97	0.200113	0.140715	1.42212	0.154993	0.255817	ARID4B	N.S.
1608.22	1.257	0.16642	7.55317	4.2479e-14	5.43651e-13	ARID5A	padj<0.05 & Upregulated
12038.6	-0.644923	0.111981	-5.75923	8.44993e-09	6.48001e-08	ARID5B	padj<0.05 & Downregulated
7677.72	0.108657	0.136046	0.798676	0.424478	0.552459	ARIH1	N.S.
9729.07	-0.199424	0.130491	-1.52825	0.12645	0.217414	ARIH2	N.S.
190.179	-0.227876	0.194325	-1.17265	0.240934	0.360708	ARIH2OS	N.S.
6860.43	-0.173198	0.0864686	-2.00302	0.0451751	0.0933105	ARL1	N.S.
2070.21	-0.965269	0.311055	-3.10321	0.00191434	0.00599984	ARL10	padj<0.05 & Downregulated
2.67389	4.88844	1.59874	3.05769	0.00223054	0.00688272	ARL11	padj<0.05 & Upregulated
1.91065	1.71288	1.37071	1.24963	0.211433	0.326661	ARL13A	N.S.
1852.54	-0.732166	0.165967	-4.41152	1.02648e-05	5.08744e-05	ARL13B	padj<0.05 & Downregulated
139.125	5.58925	0.388625	14.3821	6.70216e-47	3.42596e-45	ARL14	padj<0.05 & Upregulated
2255.14	0.0937954	0.117493	0.798309	0.424691	0.552695	ARL14EP	N.S.
45.2575	8.96959	1.12655	7.96197	1.69324e-15	2.36497e-14	ARL14EPL	padj<0.05 & Upregulated
2320.43	0.994222	0.114116	8.71235	2.97635e-18	4.93163e-17	ARL15	padj<0.05 & Upregulated
3643.48	-0.214869	0.108709	-1.97654	0.0480933	0.0984168	ARL16	N.S.
372.384	-0.266946	0.208468	-1.28051	0.200364	0.313711	ARL17A	N.S.
257.616	-0.354302	0.121902	-2.90644	0.00365567	0.0106338	ARL17B	padj<0.05 & Downregulated
6402.97	-0.27035	0.106328	-2.54261	0.0110028	0.0281134	ARL2	padj<0.05 & Downregulated
8.14312	-0.484304	1.45129	-0.333706	0.738602	0.819684	ARL2-SNX15	N.S.
6942.46	0.409235	0.0996439	4.10698	4.00864e-05	0.000180648	ARL2BP	padj<0.05 & Upregulated
2046.44	-0.475166	0.189609	-2.50603	0.0122096	0.0307018	ARL3	padj<0.05 & Downregulated
14764.3	-0.932514	0.170792	-5.45994	4.76292e-08	3.31163e-07	ARL4A	padj<0.05 & Downregulated
507.779	3.22265	0.251163	12.8309	1.10056e-37	4.31099e-36	ARL4C	padj<0.05 & Upregulated
4098.14	0.286649	0.18917	1.51529	0.129698	0.221665	ARL4D	N.S.
4293.98	-0.572211	0.159606	-3.58514	0.000336897	0.00126589	ARL5A	padj<0.05 & Downregulated
4808.56	-0.108942	0.169078	-0.644328	0.519363	0.639699	ARL5B	N.S.
2.20099	-2.84116	1.49421	-1.90144	0.0572441	0.113699	ARL5C	N.S.
685.15	-0.442161	0.116042	-3.81036	0.000138763	0.00056487	ARL6	padj<0.05 & Downregulated
16741.4	-0.628242	0.0956226	-6.57001	5.03108e-11	4.82115e-10	ARL6IP1	padj<0.05 & Downregulated
8217.92	0.145942	0.150532	0.969509	0.332291	0.461565	ARL6IP4	N.S.
9214.21	0.310224	0.120346	2.57778	0.0099437	0.025724	ARL6IP5	padj<0.05 & Upregulated
1979.36	-0.376988	0.163383	-2.30739	0.0210331	0.0488446	ARL6IP6	padj<0.05 & Downregulated
6281.99	0.0395554	0.119093	0.332138	0.739785	0.820461	ARL8A	N.S.
11898	0.129771	0.109578	1.18429	0.2363	0.355112	ARL8B	N.S.
5.97083	0.875366	0.778855	1.12391	0.261049	0.38432	ARL9	N.S.
4400.48	-0.284694	0.0928072	-3.06758	0.002158	0.00668137	ARMC1	padj<0.05 & Downregulated
3638.41	-0.00901606	0.0916003	-0.0984283	0.921592	0.949261	ARMC10	N.S.
79.1432	-1.34586	0.268053	-5.02087	5.14376e-07	3.09603e-06	ARMC12	padj<0.05 & Downregulated
142.248	-0.621773	0.230826	-2.69369	0.00706664	0.0190975	ARMC2	padj<0.05 & Downregulated
6.36717	-0.158833	0.89857	-0.176762	0.859695	0.907708	ARMC3	N.S.
3.3808	2.72166	1.38619	1.96341	0.0495989	0.101059	ARMC4	N.S.
1662.17	-0.127664	0.101213	-1.26135	0.207183	0.321787	ARMC5	N.S.
3723.37	-0.468107	0.109393	-4.27914	1.87617e-05	8.90862e-05	ARMC6	padj<0.05 & Downregulated
1762.8	-0.0746744	0.111076	-0.672279	0.501406	0.623302	ARMC7	N.S.
2952.63	0.0536108	0.0788956	0.679515	0.496811	0.618925	ARMC8	N.S.
1388.85	-0.415232	0.168945	-2.45779	0.0139795	0.0344663	ARMC9	padj<0.05 & Downregulated
23.9255	0.672474	0.455933	1.47494	0.140228	0.235725	ARMCX1	N.S.
0.314466	1.67239	3.51445	0.475861	0.634173	NA	ARMCX2	N.S.
4261.67	0.0757191	0.209518	0.361397	0.717803	0.803856	ARMCX3	N.S.
371.465	-0.69988	0.219453	-3.1892	0.00142665	0.00461911	ARMCX4	padj<0.05 & Downregulated
1185.75	-0.327107	0.165086	-1.98144	0.0475424	0.0974495	ARMCX5	N.S.
2047.9	-0.0876753	0.197356	-0.44425	0.656862	0.754962	ARMCX6	N.S.
3.24453	0.945164	1.05449	0.89632	0.370082	0.499992	ARMS2	N.S.
2212.39	-0.070953	0.14183	-0.500268	0.616886	0.722565	ARMT1	N.S.
5585.51	-0.298537	0.188103	-1.58709	0.112492	0.198165	ARNT	N.S.
452.488	0.543022	0.313049	1.73462	0.0828083	0.154196	ARNT2	N.S.
1215.82	0.692046	0.142558	4.8545	1.20693e-06	6.88642e-06	ARNTL	padj<0.05 & Upregulated
2223.25	0.772097	0.116282	6.63987	3.1397e-11	3.07116e-10	ARNTL2	padj<0.05 & Upregulated
11711.6	0.25386	0.138943	1.82708	0.0676871	0.130656	ARPC1A	N.S.
13003.7	-0.0311334	0.104293	-0.298519	0.765307	0.839103	ARPC1B	N.S.
25896.2	0.137616	0.106583	1.29116	0.196647	0.308835	ARPC2	N.S.
19685.8	0.254303	0.156748	1.62237	0.104725	0.187092	ARPC3	N.S.
6328.53	-0.522193	0.113548	-4.59886	4.24817e-06	2.24054e-05	ARPC4	padj<0.05 & Downregulated
664.804	-0.395848	0.275253	-1.43812	0.150399	0.249486	ARPC4-TTLL3	N.S.
24871.5	-0.00748999	0.0916528	-0.0817214	0.934868	0.958463	ARPC5	N.S.
4925.34	-0.012962	0.149488	-0.0867092	0.930903	0.956244	ARPC5L	N.S.
1699.13	-0.534106	0.161156	-3.31422	0.000918999	0.00311473	ARPIN	padj<0.05 & Downregulated
12152.3	0.146435	0.103758	1.41131	0.158152	0.259727	ARPP19	N.S.
5.47448	-1.21139	0.909694	-1.33165	0.182976	0.291585	ARPP21	N.S.
0.96186	-0.499593	2.29102	-0.218066	0.827378	0.884298	ARR3	N.S.
873.507	0.789848	0.171021	4.61842	3.86669e-06	2.05614e-05	ARRB1	padj<0.05 & Upregulated
1802.99	-0.667884	0.124471	-5.36577	8.06047e-08	5.41225e-07	ARRB2	padj<0.05 & Downregulated
2771.33	0.555665	0.147272	3.77305	0.000161262	0.00064933	ARRDC1	padj<0.05 & Upregulated
2452.58	0.347737	0.136411	2.54918	0.0107977	0.0276745	ARRDC2	padj<0.05 & Upregulated
6840.23	2.32727	0.200811	11.5894	4.66487e-31	1.42405e-29	ARRDC3	padj<0.05 & Upregulated
2432.73	0.998526	0.102793	9.71391	2.63058e-22	5.4458e-21	ARRDC4	padj<0.05 & Upregulated
0.121161	-0.665912	3.53381	-0.18844	0.850532	NA	ARRDC5	N.S.
2616.08	0.686207	0.15281	4.49058	7.10298e-06	3.62447e-05	ARSA	padj<0.05 & Upregulated
2351.33	-0.369841	0.148394	-2.49228	0.0126924	0.0317283	ARSB	padj<0.05 & Downregulated
1855.7	0.00647107	0.203096	0.0318621	0.974582	0.98452	ARSD	N.S.
0.413353	-0.82461	3.52587	-0.233875	0.815082	NA	ARSE	N.S.
0.371938	-0.744511	3.38978	-0.219634	0.826156	NA	ARSF	N.S.
552.254	-0.447268	0.198131	-2.25743	0.023981	0.0546494	ARSG	N.S.
0	NA	NA	NA	NA	NA	ARSH	N.S.
32.066	4.78836	0.576252	8.3095	9.6108e-17	1.44793e-15	ARSI	padj<0.05 & Upregulated
458.011	2.86268	0.148937	19.2207	2.48577e-82	2.64204e-80	ARSJ	padj<0.05 & Upregulated
1367.27	0.130617	0.11709	1.11552	0.264627	0.388406	ARSK	N.S.
0.837386	2.25709	2.76794	0.815439	0.414821	0.543136	ART1	N.S.
0.889573	3.25009	2.57578	1.26179	0.207025	0.32157	ART3	N.S.
3.82754	3.88052	1.53117	2.53435	0.0112655	0.028688	ART4	padj<0.05 & Upregulated
0.780467	-0.225963	2.09525	-0.107845	0.914118	0.944069	ART5	N.S.
75.9039	1.10984	0.283301	3.91751	8.94676e-05	0.000377605	ARTN	padj<0.05 & Upregulated
1873.77	-0.263684	0.0932474	-2.82778	0.00468714	0.0132978	ARV1	padj<0.05 & Downregulated
1927.65	0.377784	0.247923	1.52379	0.12756	0.218768	ARVCF	N.S.
42.7082	-0.596101	0.317557	-1.87715	0.0604976	0.119175	ARX	N.S.
54.4846	0.59259	0.306895	1.93092	0.053493	0.107498	AS3MT	N.S.
7213.72	-0.256324	0.148035	-1.73151	0.0833604	0.155059	ASAH1	N.S.
255.044	-0.116465	0.25846	-0.450613	0.652268	0.751417	ASAH2	N.S.
665.381	-0.353523	0.152259	-2.32185	0.0202411	0.0472256	ASAH2B	padj<0.05 & Downregulated
8742.11	0.685114	0.119032	5.75573	8.62664e-09	6.601e-08	ASAP1	padj<0.05 & Upregulated
2744.57	1.21733	0.156004	7.80319	6.03626e-15	8.12495e-14	ASAP2	padj<0.05 & Upregulated
2134.61	0.634558	0.189522	3.34821	0.000813355	0.00279416	ASAP3	padj<0.05 & Upregulated
2069.18	-0.0199143	0.11774	-0.169138	0.865688	0.911771	ASB1	N.S.
0.574332	2.58804	3.46084	0.747807	0.454577	NA	ASB10	N.S.
0.679398	-1.90385	2.9356	-0.648538	0.516637	0.636746	ASB11	N.S.
23.3576	0.797919	0.397953	2.00506	0.0449569	0.0929369	ASB12	N.S.
2050.85	-0.208576	0.128765	-1.61981	0.105272	0.187954	ASB13	N.S.
25.5096	0.17662	0.384946	0.458818	0.646365	0.74659	ASB14	N.S.
0.385879	2.03602	3.48736	0.58383	0.559335	NA	ASB15	N.S.
102.176	-0.697981	0.292718	-2.38449	0.017103	0.0408948	ASB16	padj<0.05 & Downregulated
0	NA	NA	NA	NA	NA	ASB17	N.S.
0.918074	1.45645	1.99186	0.731202	0.464656	0.590305	ASB18	N.S.
50.9902	1.80738	0.328702	5.49853	3.82963e-08	2.68846e-07	ASB2	padj<0.05 & Upregulated
1480.86	0.0922616	0.123411	0.747597	0.454704	0.580953	ASB3	N.S.
0.459823	1.36157	3.50952	0.387965	0.698042	NA	ASB4	N.S.
4.28878	2.5318	0.962535	2.63034	0.00852985	0.0224836	ASB5	padj<0.05 & Upregulated
3542.16	0.118418	0.0900012	1.31574	0.188262	0.298219	ASB6	N.S.
1616.08	-0.0143679	0.0869385	-0.165265	0.868735	0.913492	ASB7	N.S.
1989.19	0.0512832	0.0943455	0.543568	0.586739	0.698357	ASB8	N.S.
7.47531	1.49863	0.784324	1.91073	0.0560391	0.1117	ASB9	N.S.
2199.19	0.0969578	0.101108	0.958952	0.337583	0.467239	ASCC1	N.S.
5737.42	0.295787	0.125863	2.35007	0.0187697	0.0442787	ASCC2	padj<0.05 & Upregulated
7611.69	0.0668742	0.146546	0.456337	0.648147	0.748054	ASCC3	N.S.
8.03247	-0.688489	0.74717	-0.921462	0.356809	0.487158	ASCL1	N.S.
5.32318	-0.0154958	0.838939	-0.0184708	0.985263	0.991177	ASCL2	N.S.
0.358138	-1.93861	3.36339	-0.576387	0.564354	NA	ASCL3	N.S.
0.123055	0.776761	3.53381	0.219808	0.826021	NA	ASCL4	N.S.
13.4862	0.00456151	0.531275	0.00858597	0.993149	0.995777	ASCL5	N.S.
2787.89	-0.356715	0.1575	-2.26485	0.0235217	0.0537713	ASF1A	N.S.
2013.49	-1.65567	0.122755	-13.4876	1.85133e-41	8.08783e-40	ASF1B	padj<0.05 & Downregulated
85.6831	-0.430304	0.438353	-0.981638	0.326278	0.455207	ASGR1	N.S.
0	NA	NA	NA	NA	NA	ASGR2	N.S.
3761.43	-0.065693	0.177557	-0.369982	0.711396	0.798212	ASH1L	N.S.
3642.63	-0.138382	0.0814352	-1.69929	0.0892645	0.164063	ASH2L	N.S.
1971.05	-0.0982806	0.142943	-0.687549	0.491737	0.61453	ASIC1	N.S.
17.7559	5.59259	1.00074	5.58844	2.29113e-08	1.66057e-07	ASIC2	padj<0.05 & Upregulated
477.173	0.637292	0.165532	3.84997	0.000118132	0.000487375	ASIC3	padj<0.05 & Upregulated
64.742	0.582368	0.333321	1.74717	0.0806084	0.150938	ASIC4	N.S.
0	NA	NA	NA	NA	NA	ASIC5	N.S.
3.97492	-0.342433	1.40385	-0.243924	0.807289	0.870784	ASIP	N.S.
2340.78	0.144797	0.168869	0.857449	0.391197	0.520928	ASL	N.S.
0	NA	NA	NA	NA	NA	ASMT	N.S.
1832.25	-0.778618	0.114916	-6.77556	1.23925e-11	1.26992e-10	ASMTL	padj<0.05 & Downregulated
8997.67	-0.0343522	0.107983	-0.318126	0.750389	0.828585	ASNA1	N.S.
8919.65	0.16552	0.315807	0.524117	0.600197	0.70905	ASNS	N.S.
6551.67	-0.219952	0.0924392	-2.37942	0.0173399	0.0413647	ASNSD1	padj<0.05 & Downregulated
1.0626	1.64073	1.85327	0.885316	0.375986	0.505969	ASPA	N.S.
5.77681	0.170157	0.807088	0.210829	0.833021	0.888671	ASPDH	N.S.
1.08041	-3.43085	2.61389	-1.31254	0.189337	0.299568	ASPG	N.S.
9391.99	1.24519	0.158953	7.83368	4.73781e-15	6.43685e-14	ASPH	padj<0.05 & Upregulated
1561.16	0.00532288	0.170035	0.0313047	0.975027	0.984639	ASPHD1	N.S.
830.344	-0.0619513	0.172853	-0.358404	0.720041	0.80569	ASPHD2	N.S.
2555.48	-1.91329	0.157999	-12.1095	9.40409e-34	3.25243e-32	ASPM	padj<0.05 & Downregulated
3.21836	2.94516	1.28782	2.28694	0.0221993	0.0511983	ASPN	N.S.
56.2212	0.507926	0.240756	2.10971	0.034883	0.0749471	ASPRV1	N.S.
3801.61	-0.0534064	0.158115	-0.33777	0.735537	0.817466	ASPSCR1	N.S.
2044.14	-1.1031	0.166464	-6.62667	3.43352e-11	3.34729e-10	ASRGL1	padj<0.05 & Downregulated
30.873	0.370504	0.418871	0.884529	0.376411	0.506228	ASS1	N.S.
474.943	-0.0725548	0.102401	-0.708535	0.478613	0.602884	ASTE1	N.S.
4.94983	4.28473	1.34403	3.18797	0.00143275	0.00463602	ASTL	padj<0.05 & Upregulated
785.51	7.46306	0.636702	11.7214	9.89779e-32	3.11423e-30	ASTN1	padj<0.05 & Upregulated
1562.32	-0.890716	0.141467	-6.29626	3.04905e-10	2.73536e-09	ASTN2	padj<0.05 & Downregulated
3642.65	-0.365581	0.121448	-3.01018	0.0026109	0.00789291	ASUN	padj<0.05 & Downregulated
7664.86	-0.34591	0.144384	-2.39577	0.0165855	0.0398487	ASXL1	padj<0.05 & Downregulated
4680.24	-0.0656677	0.155777	-0.421549	0.673354	0.768848	ASXL2	N.S.
13.1925	-0.803269	0.673992	-1.19181	0.233337	0.351592	ASXL3	N.S.
0.398805	-1.17189	3.34019	-0.350844	0.725705	NA	ASZ1	N.S.
5918.23	0.19478	0.141636	1.37521	0.169066	0.274088	ATAD1	N.S.
4291.86	-1.04778	0.140281	-7.4692	8.06848e-14	1.00387e-12	ATAD2	padj<0.05 & Downregulated
2594.99	-0.852743	0.184703	-4.61684	3.8963e-06	2.07062e-05	ATAD2B	padj<0.05 & Downregulated
4396.77	-0.479625	0.0849219	-5.64783	1.62483e-08	1.2026e-07	ATAD3A	padj<0.05 & Downregulated
4305.21	-0.966695	0.101241	-9.54845	1.31657e-21	2.62877e-20	ATAD3B	padj<0.05 & Downregulated
34.5529	-0.566943	0.437748	-1.29514	0.195273	0.307092	ATAD3C	N.S.
661.344	-1.32739	0.198853	-6.67525	2.46814e-11	2.4528e-10	ATAD5	padj<0.05 & Downregulated
1166	-0.374452	0.138453	-2.70454	0.00683995	0.0185625	ATAT1	padj<0.05 & Downregulated
1.11663	-1.77925	2.25544	-0.788871	0.430187	0.557867	ATCAY	N.S.
2213.1	0.00297278	0.115632	0.0257089	0.97949	0.987545	ATE1	N.S.
1752.93	-0.0303452	0.147023	-0.206398	0.83648	0.890804	ATF1	N.S.
6478	-0.297514	0.112071	-2.6547	0.00793799	0.021128	ATF2	padj<0.05 & Downregulated
7749.18	3.01686	0.350629	8.60414	7.68881e-18	1.24673e-16	ATF3	padj<0.05 & Upregulated
42044	0.521318	0.216839	2.40417	0.016209	0.0390749	ATF4	padj<0.05 & Upregulated
9071.7	-0.47145	0.0978907	-4.81608	1.46402e-06	8.24535e-06	ATF5	padj<0.05 & Downregulated
5205.9	0.310813	0.0964951	3.22102	0.00127733	0.00418283	ATF6	padj<0.05 & Upregulated
4278.72	0.0655372	0.111186	0.589438	0.555568	0.671232	ATF6B	N.S.
2917.13	-0.0342339	0.0959578	-0.35676	0.721271	0.806497	ATF7	N.S.
3205.08	-0.130972	0.137164	-0.95486	0.339649	0.469576	ATF7IP	N.S.
1110.14	-0.665383	0.121333	-5.48394	4.15952e-08	2.9025e-07	ATF7IP2	padj<0.05 & Downregulated
953.412	-0.4445	0.118664	-3.74586	0.000179776	0.000717415	ATG10	padj<0.05 & Downregulated
4680.95	0.0654246	0.0699247	0.935644	0.349456	0.479689	ATG101	N.S.
4079.39	0.290496	0.122643	2.36864	0.0178538	0.0424107	ATG12	padj<0.05 & Upregulated
7787.15	0.322151	0.0904602	3.56124	0.000369103	0.00137358	ATG13	padj<0.05 & Upregulated
2622.47	0.500881	0.126038	3.97404	7.06633e-05	0.000304583	ATG14	padj<0.05 & Upregulated
3290.19	0.393136	0.0998288	3.9381	8.21294e-05	0.00034883	ATG16L1	padj<0.05 & Upregulated
1000.29	-0.791354	0.218534	-3.6212	0.00029324	0.00111995	ATG16L2	padj<0.05 & Downregulated
2808.49	0.912229	0.177183	5.14852	2.62547e-07	1.65275e-06	ATG2A	padj<0.05 & Upregulated
2787.97	0.0125137	0.174906	0.0715453	0.942964	0.963583	ATG2B	N.S.
4077.98	0.000828826	0.095637	0.00866638	0.993085	0.99577	ATG3	N.S.
1318.65	0.762424	0.138578	5.50179	3.75958e-08	2.64247e-07	ATG4A	padj<0.05 & Upregulated
5718.52	-0.00786718	0.0909618	-0.0864888	0.931078	0.956256	ATG4B	N.S.
1386.5	-1.33236	0.183574	-7.25786	3.93256e-13	4.56078e-12	ATG4C	padj<0.05 & Downregulated
3053.84	0.252741	0.285279	0.885944	0.375648	0.505631	ATG4D	N.S.
3979.84	-0.137967	0.0880414	-1.56707	0.117099	0.204422	ATG5	N.S.
2502.38	0.106969	0.122496	0.873247	0.382528	0.512281	ATG7	N.S.
18006.3	1.1872	0.154147	7.70174	1.34222e-14	1.76576e-13	ATG9A	padj<0.05 & Upregulated
508.799	3.8109	0.352841	10.8006	3.41886e-27	8.98857e-26	ATG9B	padj<0.05 & Upregulated
3925.19	-0.525626	0.270603	-1.94243	0.0520856	0.105216	ATHL1	N.S.
8873.13	-0.380417	0.107297	-3.54547	0.000391909	0.00144947	ATIC	padj<0.05 & Downregulated
964.787	-0.584913	0.108964	-5.36797	7.9629e-08	5.35705e-07	ATL1	padj<0.05 & Downregulated
4486.7	-0.316535	0.118137	-2.67939	0.0073756	0.0198183	ATL2	padj<0.05 & Downregulated
7492.6	0.442024	0.0988131	4.47334	7.70083e-06	3.9044e-05	ATL3	padj<0.05 & Upregulated
3664.49	-0.598145	0.276241	-2.1653	0.0303644	0.0667204	ATM	N.S.
8575.53	0.534341	0.120434	4.43679	9.13095e-06	4.57361e-05	ATMIN	padj<0.05 & Upregulated
11567.9	0.266438	0.116658	2.28391	0.0223765	0.0515251	ATN1	N.S.
1.65923	-2.42454	1.84899	-1.31128	0.189763	0.30005	ATOH1	N.S.
20.7488	-0.451958	0.384072	-1.17675	0.239295	0.358777	ATOH7	N.S.
78.3963	2.87612	0.518668	5.54521	2.93607e-08	2.0932e-07	ATOH8	padj<0.05 & Upregulated
6459.48	0.856147	0.193592	4.42242	9.76023e-06	4.85256e-05	ATOX1	padj<0.05 & Upregulated
143.542	5.33248	0.425944	12.5192	5.86344e-36	2.18388e-34	ATP10A	padj<0.05 & Upregulated
545.154	2.72389	0.424251	6.42047	1.35858e-10	1.26166e-09	ATP10B	padj<0.05 & Upregulated
1936.54	0.413421	0.137137	3.01466	0.00257269	0.00778956	ATP10D	padj<0.05 & Upregulated
5963.19	0.101703	0.164792	0.617163	0.537127	0.655007	ATP11A	N.S.
5109.17	-0.468814	0.162425	-2.88635	0.00389742	0.0112514	ATP11B	padj<0.05 & Downregulated
4105.01	-0.2194	0.20454	-1.07265	0.283427	0.409415	ATP11C	N.S.
2.19523	-0.655728	1.22215	-0.536537	0.591587	0.701924	ATP12A	N.S.
7371.68	0.0358403	0.101945	0.351564	0.725165	0.809242	ATP13A1	N.S.
5792.5	0.568541	0.0966002	5.88551	3.96825e-09	3.15559e-08	ATP13A2	padj<0.05 & Upregulated
9245.37	0.809717	0.105534	7.6726	1.68546e-14	2.19904e-13	ATP13A3	padj<0.05 & Upregulated
43.4323	1.0976	0.366572	2.99424	0.00275133	0.00826584	ATP13A4	padj<0.05 & Upregulated
32.4325	2.65349	0.85935	3.08779	0.00201648	0.00628003	ATP13A5	padj<0.05 & Upregulated
35195.2	0.705368	0.217329	3.24563	0.00117191	0.003874	ATP1A1	padj<0.05 & Upregulated
39.6968	7.97209	1.12819	7.06627	1.59151e-12	1.77263e-11	ATP1A2	padj<0.05 & Upregulated
2617.83	-1.06544	0.151299	-7.04198	1.89528e-12	2.10425e-11	ATP1A3	padj<0.05 & Downregulated
0.373952	1.17029	3.38613	0.345613	0.729634	NA	ATP1A4	N.S.
7803.59	0.306891	0.305193	1.00556	0.314627	0.443244	ATP1B1	N.S.
2.88129	1.04322	1.14664	0.909802	0.362927	0.493462	ATP1B2	N.S.
11637.6	0.169792	0.218187	0.778195	0.436454	0.563877	ATP1B3	N.S.
0.597415	0.708905	3.01414	0.235193	0.814059	0.87482	ATP1B4	N.S.
189.182	-0.0473705	0.27196	-0.174182	0.861723	0.909002	ATP2A1	N.S.
18877.2	-0.404008	0.163653	-2.46868	0.0135612	0.0335631	ATP2A2	padj<0.05 & Downregulated
154.167	-1.35503	0.215837	-6.27803	3.42888e-10	3.06193e-09	ATP2A3	padj<0.05 & Downregulated
4542.55	-0.135188	0.0911027	-1.48391	0.137832	0.232716	ATP2B1	N.S.
1450.37	-0.440114	0.249129	-1.76661	0.077294	0.145892	ATP2B2	N.S.
0.647208	-0.392577	2.97302	-0.132046	0.894948	0.931445	ATP2B3	N.S.
22466.6	0.941014	0.115	8.18273	2.77491e-16	4.05444e-15	ATP2B4	padj<0.05 & Upregulated
10588.3	0.390263	0.159281	2.45015	0.0142797	0.0350873	ATP2C1	padj<0.05 & Upregulated
46.5557	0.954153	0.455076	2.09669	0.0360211	0.0770693	ATP2C2	N.S.
6.55546	1.02614	0.692732	1.4813	0.138526	0.233457	ATP4A	N.S.
0	NA	NA	NA	NA	NA	ATP4B	N.S.
64084.4	-0.315367	0.148168	-2.12844	0.0333006	0.0719768	ATP5A1	N.S.
95656.3	-0.261457	0.215494	-1.21329	0.225019	0.341932	ATP5B	N.S.
19219.5	-0.344198	0.149007	-2.30994	0.0208914	0.0485285	ATP5C1	padj<0.05 & Downregulated
9922.27	-0.0795865	0.192607	-0.413206	0.679456	0.773643	ATP5D	N.S.
23886.7	0.326713	0.222196	1.47038	0.141458	0.237351	ATP5E	N.S.
16.624	0.25135	0.504511	0.498205	0.61834	0.723747	ATP5EP2	N.S.
17653.5	-0.324979	0.172427	-1.88474	0.059465	0.117414	ATP5F1	N.S.
5650.06	-0.561448	0.123731	-4.53765	5.68838e-06	2.94926e-05	ATP5G1	padj<0.05 & Downregulated
15553.6	-0.178129	0.127897	-1.39275	0.163694	0.266918	ATP5G2	N.S.
35690.1	-0.404279	0.170963	-2.36471	0.0180442	0.0427814	ATP5G3	padj<0.05 & Downregulated
12900.7	0.0111786	0.180456	0.0619465	0.950605	0.96892	ATP5H	N.S.
8239.06	-0.35302	0.154417	-2.28615	0.0222454	0.0512841	ATP5I	N.S.
9922.13	-0.221604	0.196502	-1.12775	0.259427	0.382482	ATP5J	N.S.
15840.5	-0.298836	0.157295	-1.89984	0.057454	0.113986	ATP5J2	N.S.
933.02	-0.511874	0.201878	-2.53557	0.0112265	0.0286053	ATP5J2-PTCD1	padj<0.05 & Downregulated
15421.6	-0.30382	0.164822	-1.84332	0.0652823	0.12679	ATP5L	N.S.
1.01901	0.0240464	1.74623	0.0137704	0.989013	0.99363	ATP5L2	N.S.
20007.3	-0.273363	0.232486	-1.17583	0.239665	0.359209	ATP5O	N.S.
1240.12	-0.253003	0.166021	-1.52392	0.127529	0.218752	ATP5S	N.S.
4721.48	-0.35546	0.0961643	-3.69638	0.000218696	0.000858194	ATP5SL	padj<0.05 & Downregulated
11458.7	0.303906	0.143027	2.12482	0.033602	0.0725346	ATP6AP1	N.S.
164.931	0.9555	0.267607	3.57053	0.000356259	0.0013309	ATP6AP1L	padj<0.05 & Upregulated
20998.2	0.151431	0.0986546	1.53496	0.124794	0.215247	ATP6AP2	N.S.
10860.6	0.33286	0.1006	3.30873	0.000937186	0.00316836	ATP6V0A1	padj<0.05 & Upregulated
2915.96	0.105482	0.116075	0.908746	0.363484	0.493988	ATP6V0A2	N.S.
13.3535	3.75382	0.810932	4.62902	3.67408e-06	1.9597e-05	ATP6V0A4	padj<0.05 & Upregulated
11761.2	-0.0121006	0.120217	-0.100657	0.919823	0.948184	ATP6V0B	N.S.
20242.8	0.343159	0.132653	2.58689	0.00968477	0.0251475	ATP6V0C	padj<0.05 & Upregulated
11876.5	0.167827	0.104059	1.6128	0.106787	0.190142	ATP6V0D1	N.S.
20.5668	3.24628	0.511694	6.34419	2.23594e-10	2.03311e-09	ATP6V0D2	padj<0.05 & Upregulated
14853.2	0.767218	0.199785	3.84021	0.000122927	0.000505362	ATP6V0E1	padj<0.05 & Upregulated
5902.52	-0.560364	0.1011	-5.54269	2.97864e-08	2.12181e-07	ATP6V0E2	padj<0.05 & Downregulated
7010.84	-0.0388456	0.108523	-0.357947	0.720383	0.805814	ATP6V1A	N.S.
123.06	2.02128	0.211812	9.5428	1.39022e-21	2.76948e-20	ATP6V1B1	padj<0.05 & Upregulated
9012.79	0.4141	0.131376	3.15202	0.00162145	0.00517931	ATP6V1B2	padj<0.05 & Upregulated
14385.9	-0.474256	0.12457	-3.80714	0.000140585	0.000571622	ATP6V1C1	padj<0.05 & Downregulated
460.778	1.62171	0.154114	10.5228	6.78307e-26	1.67236e-24	ATP6V1C2	padj<0.05 & Upregulated
5542.9	0.643624	0.219177	2.93655	0.00331887	0.00976227	ATP6V1D	padj<0.05 & Upregulated
11661	0.362092	0.139091	2.60328	0.00923361	0.0241053	ATP6V1E1	padj<0.05 & Upregulated
761.555	-0.703155	0.212337	-3.3115	0.000927986	0.00314076	ATP6V1E2	padj<0.05 & Downregulated
11389.5	0.152718	0.149582	1.02097	0.307269	0.435165	ATP6V1F	N.S.
11346.2	0.224553	0.127008	1.76803	0.0770557	0.145521	ATP6V1G1	N.S.
32.532	-0.0678059	0.348475	-0.194579	0.845723	0.897358	ATP6V1G2	N.S.
99.9063	-0.53502	0.363268	-1.4728	0.140806	0.236477	ATP6V1G2-DDX39B	N.S.
0	NA	NA	NA	NA	NA	ATP6V1G3	N.S.
7381.7	0.260012	0.144244	1.80259	0.071453	0.136703	ATP6V1H	N.S.
1065.35	-0.238695	0.213286	-1.11913	0.263084	0.386739	ATP7A	N.S.
2228.13	-0.310179	0.134077	-2.31344	0.0206987	0.0481273	ATP7B	padj<0.05 & Downregulated
661.461	-0.878808	0.174965	-5.02277	5.09316e-07	3.06981e-06	ATP8A1	padj<0.05 & Downregulated
156.565	0.309211	0.320558	0.964601	0.334745	0.464283	ATP8A2	N.S.
2013.23	3.05025	0.156549	19.4843	1.49107e-84	1.61434e-82	ATP8B1	padj<0.05 & Upregulated
7766.67	-0.0914501	0.240001	-0.381041	0.703173	0.792155	ATP8B2	N.S.
287.36	-0.835627	0.277654	-3.0096	0.00261596	0.00790547	ATP8B3	padj<0.05 & Downregulated
0.273491	1.40097	3.51735	0.398303	0.690407	NA	ATP8B4	N.S.
4689	-0.623537	0.122987	-5.06994	3.97931e-07	2.43551e-06	ATP9A	padj<0.05 & Downregulated
1027.78	0.0311604	0.113125	0.275452	0.782969	0.853631	ATP9B	N.S.
5104.12	0.230972	0.129783	1.77967	0.0751294	0.142594	ATPAF1	N.S.
2747.16	0.152998	0.116959	1.30814	0.190826	0.301363	ATPAF2	N.S.
6835.39	0.0368144	0.170023	0.216526	0.828578	0.885025	ATPIF1	N.S.
2230.08	-0.0575603	0.174157	-0.330508	0.741016	0.821461	ATR	N.S.
5671.03	-0.206769	0.130336	-1.58643	0.112642	0.19841	ATRAID	N.S.
1354.33	-0.472546	0.140538	-3.36241	0.000772649	0.002668	ATRIP	padj<0.05 & Downregulated
6053.51	-0.0608588	0.114791	-0.53017	0.595994	0.705615	ATRN	N.S.
86.7367	-0.64453	0.217137	-2.96831	0.00299446	0.00891942	ATRNL1	padj<0.05 & Downregulated
4050.47	-0.0861575	0.191819	-0.449161	0.653315	0.752242	ATRX	N.S.
187.067	4.13233	0.42799	9.6552	4.67253e-22	9.52594e-21	ATXN1	padj<0.05 & Upregulated
13502.7	0.232372	0.141126	1.64656	0.0996491	0.179496	ATXN10	N.S.
4455.04	0.381711	0.119141	3.20385	0.00135603	0.00441318	ATXN1L	padj<0.05 & Upregulated
4134.14	0.0994019	0.122744	0.809831	0.418037	0.546367	ATXN2	N.S.
16133.2	0.203645	0.109412	1.86126	0.0627072	0.122622	ATXN2L	N.S.
1732.88	0.446166	0.0909335	4.90651	9.27103e-07	5.39037e-06	ATXN3	padj<0.05 & Upregulated
0.241676	-1.39291	3.53047	-0.39454	0.693182	NA	ATXN3L	N.S.
1693.55	-0.257811	0.159349	-1.61791	0.105683	0.188552	ATXN7	N.S.
453.81	0.016626	0.142167	0.116947	0.906902	0.939344	ATXN7L1	N.S.
924.963	-0.383511	0.130413	-2.94073	0.00327441	0.00964976	ATXN7L2	padj<0.05 & Downregulated
7715.51	-0.116529	0.145308	-0.801944	0.422585	0.550871	ATXN7L3	N.S.
8290.96	-0.0545482	0.122391	-0.44569	0.655821	0.75426	ATXN7L3B	N.S.
769.559	0.435335	0.135359	3.21616	0.00129919	0.00424642	AUH	padj<0.05 & Upregulated
504.028	-1.04198	0.141195	-7.37968	1.5867e-13	1.91669e-12	AUNIP	padj<0.05 & Downregulated
15285.9	-0.0678011	0.117634	-0.576372	0.564363	0.67877	AUP1	N.S.
2800.49	-1.36752	0.137834	-9.92151	3.35627e-23	7.24048e-22	AURKA	padj<0.05 & Downregulated
10774	-0.0476982	0.140062	-0.340551	0.733442	0.815502	AURKAIP1	N.S.
1722.98	-2.43748	0.1205	-20.2281	5.54088e-91	6.75406e-89	AURKB	padj<0.05 & Downregulated
28.2108	0.646275	0.355712	1.81685	0.06924	0.1332	AURKC	N.S.
1058.6	0.660998	0.184352	3.58553	0.000336396	0.00126455	AUTS2	padj<0.05 & Upregulated
1038.45	1.37206	0.174665	7.85539	3.98525e-15	5.42711e-14	AVEN	padj<0.05 & Upregulated
83.5064	0.428445	0.350835	1.22122	0.222004	0.339004	AVIL	N.S.
3537.71	-0.0696117	0.113865	-0.61135	0.540968	0.6584	AVL9	N.S.
0.9214	2.41551	2.23861	1.07902	0.280578	0.406343	AVP	N.S.
2028.53	0.601963	0.210403	2.86099	0.00422315	0.0121035	AVPI1	padj<0.05 & Upregulated
5.17499	-2.50707	1.08271	-2.31556	0.0205826	0.0479133	AVPR1A	padj<0.05 & Downregulated
0	NA	NA	NA	NA	NA	AVPR1B	N.S.
18.4355	-1.4571	0.717908	-2.02965	0.0423921	0.0884001	AVPR2	N.S.
0.157233	0.776761	3.53381	0.219808	0.826021	NA	AWAT1	N.S.
0.123055	0.776761	3.53381	0.219808	0.826021	NA	AWAT2	N.S.
5.90394	0.384382	0.762227	0.504288	0.614059	0.72064	AXDND1	N.S.
3446.88	0.150731	0.079443	1.89735	0.0577822	0.114559	AXIN1	N.S.
944.611	-0.476116	0.174303	-2.73154	0.00630389	0.0172582	AXIN2	padj<0.05 & Downregulated
833.181	2.6314	0.219767	11.9736	4.88757e-33	1.64788e-31	AXL	padj<0.05 & Upregulated
32.8179	4.9243	0.84538	5.82495	5.71283e-09	4.45749e-08	AZGP1	padj<0.05 & Upregulated
4314.29	-0.0248173	0.130065	-0.190807	0.848676	0.899616	AZI2	N.S.
21697.1	-0.552936	0.18658	-2.96353	0.00304134	0.00903899	AZIN1	padj<0.05 & Downregulated
595.95	0.353076	0.231137	1.52756	0.126621	0.217645	AZIN2	N.S.
118.111	-1.28151	0.267724	-4.78669	1.69552e-06	9.44842e-06	AZU1	padj<0.05 & Downregulated
152093	2.11902	0.188066	11.2674	1.90047e-29	5.41292e-28	B2M	padj<0.05 & Upregulated
111.117	0.398649	0.514772	0.774419	0.438683	0.565834	B3GALNT1	N.S.
1163.33	-0.147778	0.171393	-0.862216	0.388568	0.51822	B3GALNT2	N.S.
189.124	-1.43408	0.289086	-4.96074	7.02254e-07	4.14247e-06	B3GALT1	padj<0.05 & Downregulated
4714.58	-0.321962	0.285962	-1.12589	0.260213	0.383348	B3GALT2	N.S.
89.0148	-0.384081	0.339471	-1.13141	0.257882	0.380718	B3GALT4	N.S.
1.45885	4.01753	1.8275	2.19837	0.0279227	0.0621689	B3GALT5	N.S.
3056.71	-0.372289	0.133536	-2.78794	0.00530448	0.0148248	B3GALT6	padj<0.05 & Downregulated
22.1453	-0.138593	0.393813	-0.351926	0.724894	0.809043	B3GAT1	N.S.
83.6938	-0.8393	0.244732	-3.42947	0.000604765	0.00215061	B3GAT2	padj<0.05 & Downregulated
6007.4	-0.224127	0.10392	-2.15673	0.0310269	0.0679178	B3GAT3	N.S.
1321.42	0.46833	0.0873528	5.36136	8.25965e-08	5.54172e-07	B3GLCT	padj<0.05 & Upregulated
3345.09	-0.0822341	0.101542	-0.809851	0.418026	0.546367	B3GNT2	N.S.
0.916626	2.17198	1.95352	1.11183	0.266211	0.390206	B3GNT3	N.S.
471.951	-0.649386	0.156203	-4.15733	3.21994e-05	0.000147469	B3GNT4	padj<0.05 & Downregulated
794.672	-0.574031	0.234702	-2.44578	0.0144538	0.035431	B3GNT5	padj<0.05 & Downregulated
0.750165	-1.02983	2.87428	-0.358293	0.720124	0.80569	B3GNT6	N.S.
7.58587	1.54801	0.800461	1.9339	0.053125	0.106919	B3GNT7	N.S.
12.8558	0.992223	0.673624	1.47296	0.140761	0.236424	B3GNT8	N.S.
158.331	0.497545	0.20705	2.40302	0.0162602	0.0391914	B3GNT9	padj<0.05 & Upregulated
495.324	-0.866462	0.198126	-4.37329	1.22388e-05	6.00772e-05	B3GNTL1	padj<0.05 & Downregulated
7918.48	-1.26869	0.217692	-5.82792	5.61215e-09	4.38482e-08	B4GALNT1	padj<0.05 & Downregulated
4.755	4.35038	1.46522	2.9691	0.00298673	0.00890249	B4GALNT2	padj<0.05 & Upregulated
1864.79	2.57754	0.159728	16.137	1.40163e-58	9.18488e-57	B4GALNT3	padj<0.05 & Upregulated
4869.85	-0.547875	0.180487	-3.03553	0.00240111	0.00733633	B4GALNT4	padj<0.05 & Downregulated
10476	1.22105	0.096954	12.5941	2.27494e-36	8.54621e-35	B4GALT1	padj<0.05 & Upregulated
6399.03	-0.246722	0.0867226	-2.84496	0.00444173	0.0126654	B4GALT2	padj<0.05 & Downregulated
5120.83	-0.362075	0.10558	-3.42939	0.000604949	0.0021507	B4GALT3	padj<0.05 & Downregulated
1795.91	0.603739	0.0928502	6.50229	7.91045e-11	7.46142e-10	B4GALT4	padj<0.05 & Upregulated
6264.83	-0.0244507	0.107609	-0.227219	0.820254	0.879272	B4GALT5	N.S.
1350.06	-0.707601	0.184296	-3.83947	0.000123298	0.000506771	B4GALT6	padj<0.05 & Downregulated
2012.25	-0.352014	0.100517	-3.50203	0.000461733	0.00168413	B4GALT7	padj<0.05 & Downregulated
3263.24	-0.588306	0.10979	-5.35849	8.3922e-08	5.62632e-07	B4GAT1	padj<0.05 & Downregulated
850.497	-0.778495	0.178655	-4.35753	1.31539e-05	6.43156e-05	B9D1	padj<0.05 & Downregulated
294.014	-0.0420901	0.145615	-0.289051	0.772543	0.845075	B9D2	N.S.
6.31367	1.88124	0.866864	2.17016	0.0299944	0.0660559	BAALC	N.S.
17.9368	0.572437	0.570431	1.00352	0.315612	0.444236	BAAT	N.S.
6178.83	0.102342	0.10962	0.933606	0.350507	0.480699	BABAM1	N.S.
3201.76	0.286886	0.0840363	3.41384	0.000640553	0.00226113	BACE1	padj<0.05 & Upregulated
2951.88	0.743898	0.191134	3.89201	9.94157e-05	0.000416396	BACE2	padj<0.05 & Upregulated
2139.72	0.470029	0.123639	3.80161	0.000143757	0.000583428	BACH1	padj<0.05 & Upregulated
47.8988	2.29152	0.430984	5.31694	1.05529e-07	6.96506e-07	BACH2	padj<0.05 & Upregulated
3916.78	-0.258803	0.147563	-1.75385	0.0794567	0.14915	BAD	N.S.
7311.68	0.431944	0.172724	2.50077	0.0123924	0.0311177	BAG1	padj<0.05 & Upregulated
2368.38	0.179058	0.142966	1.25245	0.210405	0.325572	BAG2	N.S.
12945.3	0.71285	0.203702	3.49947	0.000466191	0.00169787	BAG3	padj<0.05 & Upregulated
2098.36	0.1312	0.108124	1.21342	0.22497	0.341904	BAG4	N.S.
3225.58	0.0361711	0.0822446	0.439799	0.660083	0.757565	BAG5	N.S.
16684.1	0.138726	0.138104	1.0045	0.315137	0.443748	BAG6	N.S.
0	NA	NA	NA	NA	NA	BAGE5	N.S.
1204.38	-0.0353645	0.217059	-0.162925	0.870577	0.914875	BAHCC1	N.S.
3526.65	0.15879	0.0762178	2.08337	0.0372177	0.079163	BAHD1	N.S.
4380.28	0.563141	0.145404	3.87294	0.00010753	0.000447445	BAIAP2	padj<0.05 & Upregulated
4745.15	0.0688411	0.135051	0.509742	0.610232	0.717889	BAIAP2L1	N.S.
43.6136	0.514567	0.338742	1.51905	0.12875	0.220434	BAIAP2L2	N.S.
479.871	-0.511354	0.329769	-1.55065	0.120987	0.209926	BAIAP3	N.S.
8528.81	0.57825	0.115929	4.98796	6.10195e-07	3.63262e-06	BAK1	padj<0.05 & Upregulated
533.234	1.32968	0.420543	3.16181	0.00156789	0.00502666	BAMBI	padj<0.05 & Upregulated
13329.5	-0.0790275	0.123944	-0.637606	0.52373	0.643453	BANF1	N.S.
0	NA	NA	NA	NA	NA	BANF2	N.S.
6.47589	2.32518	0.851575	2.73044	0.00632498	0.0173078	BANK1	padj<0.05 & Upregulated
1156.34	-0.177135	0.120809	-1.46624	0.142584	0.238864	BANP	N.S.
9887.56	-0.0231591	0.123165	-0.188034	0.85085	0.901098	BAP1	N.S.
713.954	-1.15636	0.173087	-6.68079	2.37652e-11	2.3685e-10	BARD1	padj<0.05 & Downregulated
0.572518	2.58557	2.48078	1.04224	0.297302	NA	BARHL1	N.S.
179.548	-0.672171	0.211775	-3.17399	0.00150359	0.00483919	BARHL2	padj<0.05 & Downregulated
4453.28	-0.317073	0.203016	-1.56181	0.118333	0.206064	BARX1	N.S.
77.131	4.00591	0.392816	10.1979	2.02518e-24	4.64485e-23	BARX2	padj<0.05 & Upregulated
487.148	3.09705	0.288588	10.7317	7.22364e-27	1.85891e-25	BASP1	padj<0.05 & Upregulated
0.529714	0.52848	3.51186	0.150484	0.880383	NA	BATF	N.S.
2278.82	1.82242	0.173786	10.4866	9.95823e-26	2.43795e-24	BATF2	padj<0.05 & Upregulated
324.095	-0.805397	0.397944	-2.02389	0.042981	0.0894035	BATF3	N.S.
16354.2	-0.113576	0.0982023	-1.15655	0.247454	0.368444	BAX	N.S.
4478.37	0.15296	0.149296	1.02454	0.305581	0.433585	BAZ1A	N.S.
7647.63	-0.292949	0.116357	-2.51768	0.0118132	0.0298256	BAZ1B	padj<0.05 & Downregulated
7996.73	-0.0080776	0.173428	-0.0465762	0.962851	0.97726	BAZ2A	N.S.
1188.98	1.05131	0.169194	6.21364	5.17722e-10	4.55089e-09	BAZ2B	padj<0.05 & Upregulated
5924.71	0.649443	0.141907	4.57654	4.72728e-06	2.476e-05	BBC3	padj<0.05 & Upregulated
1072.53	-0.24594	0.132266	-1.85944	0.0629654	0.123022	BBIP1	N.S.
262.167	-0.278894	0.19799	-1.40863	0.158944	0.260854	BBOF1	N.S.
10.7698	2.74426	0.654633	4.19206	2.76439e-05	0.000127747	BBOX1	padj<0.05 & Upregulated
1611.19	0.125979	0.12521	1.00614	0.314348	0.442959	BBS1	N.S.
1152.06	0.218806	0.130232	1.68012	0.0929334	0.169714	BBS10	N.S.
1088.97	-0.510265	0.150028	-3.40112	0.000671097	0.00235465	BBS12	padj<0.05 & Downregulated
3468.35	0.277674	0.130996	2.11972	0.0340299	0.0733221	BBS2	N.S.
2568.04	-0.240228	0.127317	-1.88685	0.05918	0.116931	BBS4	N.S.
1089.28	-0.0806844	0.203496	-0.396492	0.691742	0.783225	BBS5	N.S.
2124.54	-0.420315	0.0908302	-4.62748	3.70144e-06	1.97369e-05	BBS7	padj<0.05 & Downregulated
881.742	-0.231204	0.0892547	-2.59038	0.00958695	0.0249083	BBS9	padj<0.05 & Downregulated
3735.62	0.26678	0.165679	1.61022	0.107349	0.190844	BBX	N.S.
4165.2	0.818699	0.145012	5.64573	1.64486e-08	1.21541e-07	BCAM	padj<0.05 & Upregulated
31.102	0.540643	0.508716	1.06276	0.287891	0.414455	BCAN	N.S.
4879.52	0.60107	0.107475	5.59266	2.23611e-08	1.62339e-07	BCAP29	padj<0.05 & Upregulated
26629.7	0.0964817	0.115141	0.837945	0.402061	0.531015	BCAP31	N.S.
7689.91	0.649337	0.0865883	7.49913	6.42435e-14	8.09125e-13	BCAR1	padj<0.05 & Upregulated
3463.62	3.15097	0.155858	20.217	6.94317e-91	8.40462e-89	BCAR3	padj<0.05 & Upregulated
65.2069	-1.18285	0.27134	-4.35931	1.30475e-05	6.38132e-05	BCAS1	padj<0.05 & Downregulated
4184.99	0.268968	0.186154	1.44487	0.148494	0.246938	BCAS2	N.S.
1298.47	0.356111	0.128847	2.76382	0.00571293	0.0158343	BCAS3	padj<0.05 & Upregulated
1100.31	-0.226313	0.095213	-2.37691	0.0174583	0.0416129	BCAS4	padj<0.05 & Downregulated
424.838	3.3378	0.428472	7.79002	6.69988e-15	8.99042e-14	BCAT1	padj<0.05 & Upregulated
4878.39	-0.205157	0.135387	-1.51534	0.129688	0.221665	BCAT2	N.S.
7698.22	-0.352761	0.145997	-2.41623	0.0156823	0.0379664	BCCIP	padj<0.05 & Downregulated
897.341	-0.276359	0.1341	-2.06084	0.0393181	0.0829018	BCDIN3D	N.S.
337.007	-1.75817	0.389855	-4.50981	6.48867e-06	3.32855e-05	BCHE	padj<0.05 & Downregulated
1491.8	0.606409	0.114748	5.2847	1.25913e-07	8.23871e-07	BCKDHA	padj<0.05 & Upregulated
1299.06	-0.0316691	0.0965236	-0.328097	0.742838	0.822644	BCKDHB	N.S.
3051.6	0.0763564	0.127202	0.600276	0.548322	0.664798	BCKDK	N.S.
1764.35	0.783019	0.127533	6.13975	8.26508e-10	7.12506e-09	BCL10	padj<0.05 & Upregulated
61.7643	-0.073868	0.277223	-0.266457	0.789888	0.858153	BCL11A	N.S.
46.5812	1.52096	0.464253	3.27615	0.00105234	0.00351339	BCL11B	padj<0.05 & Upregulated
91.1364	-0.972088	0.247875	-3.92168	8.79327e-05	0.000371577	BCL2	padj<0.05 & Downregulated
4.87886	3.19046	1.01829	3.13315	0.00172939	0.00549088	BCL2A1	padj<0.05 & Upregulated
13892.6	1.82749	0.158318	11.5432	7.99213e-31	2.4228e-29	BCL2L1	padj<0.05 & Upregulated
10.611	0.563414	0.574006	0.981546	0.326324	0.455234	BCL2L10	N.S.
1391.75	0.775969	0.128233	6.05122	1.43752e-09	1.20469e-08	BCL2L11	padj<0.05 & Upregulated
3600.89	-0.571646	0.11446	-4.99428	5.9055e-07	3.52409e-06	BCL2L12	padj<0.05 & Downregulated
5799.5	0.720197	0.0753625	9.55644	1.21875e-21	2.43904e-20	BCL2L13	padj<0.05 & Upregulated
10.7578	2.80367	0.690976	4.05755	4.95899e-05	0.000219949	BCL2L14	padj<0.05 & Upregulated
13.0262	-0.388491	0.71602	-0.54257	0.587426	0.698793	BCL2L15	N.S.
2522.88	0.152159	0.0905792	1.67984	0.092988	0.169796	BCL2L2	N.S.
571.039	-0.769668	0.321563	-2.39352	0.0166875	0.0400496	BCL2L2-PABPN1	padj<0.05 & Downregulated
3075.95	-0.0297322	0.188149	-0.158024	0.874438	0.917383	BCL3	N.S.
851.367	0.816134	0.147091	5.54848	2.88157e-08	2.05771e-07	BCL6	padj<0.05 & Upregulated
9.54723	-1.44449	0.821537	-1.75828	0.0786996	0.148096	BCL6B	N.S.
2418.5	-0.410054	0.186079	-2.20366	0.0275484	0.0614534	BCL7A	N.S.
4778.48	-0.198915	0.0780472	-2.54865	0.0108141	0.0277028	BCL7B	padj<0.05 & Downregulated
5405.61	-0.737552	0.170288	-4.33122	1.48288e-05	7.16809e-05	BCL7C	padj<0.05 & Downregulated
4484.05	-0.664958	0.234622	-2.83416	0.00459456	0.0130585	BCL9	padj<0.05 & Downregulated
4752.06	0.628383	0.201046	3.12556	0.00177464	0.00560395	BCL9L	padj<0.05 & Upregulated
11697.1	-0.210443	0.148403	-1.41805	0.156175	0.257183	BCLAF1	N.S.
13.1816	3.93596	0.774148	5.08426	3.6907e-07	2.27003e-06	BCO1	padj<0.05 & Upregulated
76.0034	1.55188	0.289651	5.35775	8.42664e-08	5.64725e-07	BCO2	padj<0.05 & Upregulated
2598.27	0.330148	0.0943453	3.49936	0.000466377	0.00169787	BCOR	padj<0.05 & Upregulated
2730.49	-0.234322	0.207349	-1.13009	0.258439	0.381386	BCORL1	N.S.
8039.04	0.196406	0.0901183	2.17943	0.0292999	0.0647555	BCR	N.S.
2105.05	-0.359345	0.110877	-3.24094	0.00119137	0.0039316	BCS1L	padj<0.05 & Downregulated
8.06268	3.20408	0.844002	3.79629	0.000146876	0.000594647	BDH1	padj<0.05 & Upregulated
1148.26	0.511889	0.202515	2.52766	0.0114826	0.0291426	BDH2	padj<0.05 & Upregulated
78.3359	7.63207	0.908957	8.39651	4.59934e-17	7.08225e-16	BDKRB1	padj<0.05 & Upregulated
44.5185	8.2167	1.0556	7.78388	7.03311e-15	9.4086e-14	BDKRB2	padj<0.05 & Upregulated
91.3189	2.10493	0.354973	5.92983	3.03248e-09	2.44379e-08	BDNF	padj<0.05 & Upregulated
2694.76	0.0113102	0.135862	0.0832477	0.933655	0.957777	BDP1	N.S.
273.082	1.33958	0.274824	4.87431	1.09192e-06	6.27123e-06	BEAN1	padj<0.05 & Upregulated
7887.53	0.13511	0.0990217	1.36444	0.172428	0.278218	BECN1	N.S.
0	NA	NA	NA	NA	NA	BECN2	N.S.
542.395	-0.964052	0.586113	-1.64482	0.100006	0.179953	BEGAIN	N.S.
0.248764	0.0554324	3.53381	0.0156863	0.987485	NA	BEND2	N.S.
746.735	-0.626944	0.126629	-4.95104	7.38181e-07	4.34117e-06	BEND3	padj<0.05 & Downregulated
907.43	-0.868204	0.316307	-2.74481	0.00605453	0.0166593	BEND4	padj<0.05 & Downregulated
5.84682	-0.75519	0.959109	-0.787386	0.431056	0.558725	BEND5	N.S.
215.096	1.73633	0.215182	8.06915	7.07888e-16	1.01307e-14	BEND6	padj<0.05 & Upregulated
1787.74	0.374986	0.127712	2.93618	0.00332285	0.00977068	BEND7	padj<0.05 & Upregulated
361.775	2.94723	0.361731	8.14756	3.7133e-16	5.40288e-15	BEST1	padj<0.05 & Upregulated
6.93882	-1.13929	0.729625	-1.56148	0.118411	0.206154	BEST2	N.S.
9.63224	5.16405	1.25018	4.13064	3.61749e-05	0.000164552	BEST3	padj<0.05 & Upregulated
17.0116	0.877629	0.521084	1.68424	0.092136	0.168452	BEST4	N.S.
1822.92	0.16964	0.0859154	1.9745	0.0483252	0.0988217	BET1	N.S.
5550.78	-0.0363583	0.091254	-0.39843	0.690313	0.782301	BET1L	N.S.
13.5576	0.406047	0.557374	0.7285	0.466308	0.591487	BEX1	N.S.
774.536	0.273065	0.142934	1.91043	0.0560781	0.111765	BEX2	N.S.
1573.88	-0.0404378	0.19352	-0.20896	0.83448	0.889489	BEX4	N.S.
0.736581	-0.0160348	2.11183	-0.00759285	0.993942	0.996056	BEX5	N.S.
7263.14	-0.146616	0.0736458	-1.99083	0.0464993	0.0956038	BFAR	N.S.
99.544	0.0412913	0.263652	0.156613	0.87555	0.918063	BFSP1	N.S.
0.369164	2.03972	3.48802	0.584779	0.558696	NA	BFSP2	N.S.
65.8588	2.64558	0.370697	7.13676	9.55586e-13	1.08443e-11	BGLAP	padj<0.05 & Upregulated
201.583	7.13017	1.02892	6.92978	4.21481e-12	4.52392e-11	BGN	padj<0.05 & Upregulated
12.6325	-1.09326	0.829435	-1.31808	0.187478	0.297301	BHLHA15	N.S.
1.00055	1.60546	1.77014	0.906966	0.364425	0.494727	BHLHA9	N.S.
1199.02	0.00373594	0.133418	0.0280017	0.977661	0.986489	BHLHB9	N.S.
2.95005	-0.758511	1.33033	-0.570166	0.568565	0.68259	BHLHE22	N.S.
0	NA	NA	NA	NA	NA	BHLHE23	N.S.
20590.8	0.689435	0.0923767	7.4633	8.43822e-14	1.04398e-12	BHLHE40	padj<0.05 & Upregulated
432.547	6.39495	0.308472	20.7311	1.81747e-95	2.45584e-93	BHLHE41	padj<0.05 & Upregulated
1.83217	-1.50796	1.69123	-0.891634	0.372589	0.502445	BHMG1	N.S.
0.271935	1.5192	3.52587	0.430874	0.66656	NA	BHMT	N.S.
0.289467	-0.0397416	3.53381	-0.0112461	0.991027	NA	BHMT2	N.S.
57.1609	0.835874	0.423855	1.97208	0.048601	0.0992708	BICC1	N.S.
1300.87	0.775065	0.110563	7.01018	2.38015e-12	2.61756e-11	BICD1	padj<0.05 & Upregulated
5031.09	0.223101	0.0845173	2.6397	0.00829791	0.0219552	BICD2	padj<0.05 & Upregulated
2261.48	-0.338175	0.22236	-1.52084	0.128299	0.21977	BID	N.S.
699.937	0.929838	0.183376	5.07067	3.9641e-07	2.42705e-06	BIK	padj<0.05 & Upregulated
2343.2	0.470019	0.195453	2.40476	0.016183	0.0390375	BIN1	padj<0.05 & Upregulated
7.48335	0.243383	0.697579	0.348896	0.727167	0.810801	BIN2	N.S.
1567.25	0.454477	0.10306	4.40982	1.03458e-05	5.12616e-05	BIN3	padj<0.05 & Upregulated
7342.43	0.36068	0.209337	1.72296	0.0848954	0.157511	BIRC2	N.S.
1965.26	2.51959	0.30383	8.29275	1.10657e-16	1.65995e-15	BIRC3	padj<0.05 & Upregulated
5837.09	-2.39007	0.138141	-17.3017	4.56872e-67	3.66993e-65	BIRC5	padj<0.05 & Downregulated
6296.17	0.1488	0.0882336	1.68644	0.0917116	0.167852	BIRC6	N.S.
8.05415	5.73488	1.19717	4.79036	1.66485e-06	9.28937e-06	BIRC7	padj<0.05 & Upregulated
0	NA	NA	NA	NA	NA	BIRC8	N.S.
2553.02	-0.403365	0.131186	-3.07476	0.00210673	0.00654122	BIVM	padj<0.05 & Downregulated
273.082	-0.447319	1.37563	-0.325175	0.745048	0.824725	BIVM-ERCC5	N.S.
0	NA	NA	NA	NA	NA	BLACE	N.S.
2860.22	0.17138	0.115103	1.48893	0.136507	0.231038	BLCAP	N.S.
1.78182	-0.22488	1.74782	-0.128663	0.897624	0.933227	BLID	N.S.
4.86501	-0.661316	0.856311	-0.772285	0.439946	0.566918	BLK	N.S.
707.058	-1.38385	0.159354	-8.6841	3.81763e-18	6.30163e-17	BLM	padj<0.05 & Downregulated
7466.27	-0.707137	0.164269	-4.30475	1.67178e-05	8.00132e-05	BLMH	padj<0.05 & Downregulated
16.4775	7.51415	1.2052	6.23479	4.52386e-10	3.99673e-09	BLNK	padj<0.05 & Upregulated
3343.33	-0.0970531	0.148099	-0.655325	0.512259	0.633151	BLOC1S1	N.S.
8506.89	0.116994	0.161753	0.72329	0.469502	0.594241	BLOC1S2	N.S.
1773.85	0.210025	0.107082	1.96135	0.0498377	0.101462	BLOC1S3	N.S.
2387.38	-0.264781	0.0907461	-2.91782	0.00352487	0.0103004	BLOC1S4	padj<0.05 & Downregulated
1103.87	0.107795	0.116686	0.923806	0.355588	0.485832	BLOC1S5	N.S.
151.71	-1.32768	0.793914	-1.67232	0.0944616	0.171857	BLOC1S5-TXNDC5	N.S.
4675.12	0.0335205	0.0954267	0.351269	0.725386	0.809385	BLOC1S6	N.S.
3083.83	0.063466	0.11861	0.535083	0.592593	0.702829	BLVRA	N.S.
12921.2	-0.471766	0.11757	-4.01266	6.00394e-05	0.000261964	BLVRB	padj<0.05 & Downregulated
3000.74	0.57708	0.108313	5.32788	9.93642e-08	6.57812e-07	BLZF1	padj<0.05 & Upregulated
561.049	-0.980267	0.190865	-5.13593	2.80754e-07	1.76227e-06	BMF	padj<0.05 & Downregulated
5282.47	-0.393682	0.137556	-2.86198	0.00421008	0.0120681	BMI1	padj<0.05 & Downregulated
9611.05	2.25917	0.132992	16.9873	1.02011e-64	7.66447e-63	BMP1	padj<0.05 & Upregulated
1.50701	4.06409	1.76578	2.30158	0.0213586	0.0495215	BMP10	padj<0.05 & Upregulated
0.479609	2.42178	3.06459	0.790248	0.429383	NA	BMP15	N.S.
720.126	0.69335	0.194382	3.56694	0.000361168	0.00134721	BMP2	padj<0.05 & Upregulated
1655.41	0.214738	0.127398	1.68557	0.0918788	0.16807	BMP2K	N.S.
198.152	-1.10265	0.232822	-4.73601	2.1797e-06	1.19366e-05	BMP3	padj<0.05 & Downregulated
1639.61	-0.298571	0.262333	-1.13814	0.255062	0.377482	BMP4	N.S.
18.5747	-0.180352	0.489973	-0.368086	0.712809	0.799497	BMP5	N.S.
137.002	1.92916	0.386194	4.99532	5.8739e-07	3.50991e-06	BMP6	padj<0.05 & Upregulated
3218.48	-0.51261	0.125151	-4.09593	4.20485e-05	0.000188709	BMP7	padj<0.05 & Downregulated
46.2768	-0.331392	0.391722	-0.845986	0.397561	0.526867	BMP8A	N.S.
1026.4	0.170889	0.189708	0.900801	0.367694	0.498028	BMP8B	N.S.
20.4455	-0.420213	0.51346	-0.818395	0.413132	0.54141	BMPER	N.S.
7356.16	-1.0627	0.195531	-5.43493	5.48193e-08	3.77243e-07	BMPR1A	padj<0.05 & Downregulated
2641.57	-1.26816	0.339009	-3.74077	0.000183457	0.000730432	BMPR1B	padj<0.05 & Downregulated
14718.7	-0.267519	0.167511	-1.59702	0.110261	0.194825	BMPR2	N.S.
7169.21	-0.216628	0.103307	-2.09694	0.0359987	0.077031	BMS1	N.S.
39.0481	3.61056	0.479953	7.52275	5.36379e-14	6.78985e-13	BMX	padj<0.05 & Upregulated
6.45702	0.482212	0.730473	0.660137	0.509166	0.630362	BNC1	N.S.
432.147	-0.187554	0.2225	-0.842938	0.399263	0.528449	BNC2	N.S.
1259.93	-0.111827	0.098198	-1.13879	0.254789	0.377174	BNIP1	N.S.
6118.78	0.180638	0.147185	1.22729	0.219713	0.33657	BNIP2	N.S.
7934.11	1.02212	0.115605	8.84151	9.44342e-19	1.6075e-17	BNIP3	padj<0.05 & Upregulated
10139.7	1.27513	0.135998	9.37605	6.84877e-21	1.32205e-19	BNIP3L	padj<0.05 & Upregulated
149.316	-0.0144565	0.419784	-0.034438	0.972528	0.98296	BNIPL	N.S.
357.995	0.338413	0.198148	1.70788	0.0876586	0.161776	BOC	N.S.
6180	-0.0588378	0.0798962	-0.736429	0.46147	0.587541	BOD1	N.S.
3405.82	0.380761	0.0757195	5.02857	4.94152e-07	2.9846e-06	BOD1L1	padj<0.05 & Upregulated
0.132922	-0.665912	3.53381	-0.18844	0.850532	NA	BOD1L2	N.S.
3140.85	0.00719537	0.180614	0.0398384	0.968222	0.980582	BOK	N.S.
1442.07	-0.411028	0.185734	-2.21299	0.0268985	0.0602426	BOLA1	N.S.
1273.94	-0.0933393	0.187436	-0.49798	0.618498	0.723803	BOLA2	N.S.
2414.07	-0.401838	0.166218	-2.41754	0.0156258	0.0378638	BOLA2B	padj<0.05 & Downregulated
3679.57	-0.416088	0.158922	-2.6182	0.00883958	0.0232157	BOLA3	padj<0.05 & Downregulated
4.50525	0.362904	0.92454	0.392523	0.694672	0.785471	BOLL	N.S.
7356.63	-0.418879	0.104322	-4.01524	5.93846e-05	0.000259562	BOP1	padj<0.05 & Downregulated
735.076	-1.02319	0.107871	-9.48534	2.41588e-21	4.75296e-20	BORA	padj<0.05 & Downregulated
683.936	-0.259026	0.12486	-2.07453	0.03803	0.0805566	BORCS5	N.S.
1961.56	-0.838344	0.147308	-5.69109	1.26231e-08	9.49235e-08	BORCS6	padj<0.05 & Downregulated
2210.49	0.306824	0.127537	2.40576	0.0161388	0.0389418	BORCS7	padj<0.05 & Upregulated
0	NA	NA	NA	NA	NA	BORCS7-ASMT	N.S.
1269.13	-0.342008	0.121286	-2.81986	0.00480449	0.0135733	BORCS8	padj<0.05 & Downregulated
537.786	0.184877	0.118811	1.55606	0.119693	0.208055	BORCS8-MEF2B	N.S.
2174.65	0.781939	0.13918	5.61817	1.92994e-08	1.41179e-07	BPGM	padj<0.05 & Upregulated
1858.59	-0.432603	0.119343	-3.62486	0.000289113	0.00110637	BPHL	padj<0.05 & Downregulated
0.913984	3.2917	2.54319	1.29432	0.195555	0.307452	BPI	N.S.
0	NA	NA	NA	NA	NA	BPIFA1	N.S.
1.17994	3.72037	2.32192	1.60228	0.109093	0.193292	BPIFA2	N.S.
0	NA	NA	NA	NA	NA	BPIFA3	N.S.
1.34612	3.90708	1.89664	2.06	0.0393989	0.0830526	BPIFB1	N.S.
0	NA	NA	NA	NA	NA	BPIFB2	N.S.
0	NA	NA	NA	NA	NA	BPIFB3	N.S.
0.157233	0.776761	3.53381	0.219808	0.826021	NA	BPIFB4	N.S.
0	NA	NA	NA	NA	NA	BPIFB6	N.S.
84.6735	9.87199	1.15424	8.55283	1.20107e-17	1.91545e-16	BPIFC	padj<0.05 & Upregulated
2833.74	-0.147337	0.100475	-1.4664	0.142539	0.238812	BPNT1	N.S.
7188.33	-0.175364	0.101815	-1.72237	0.0850026	0.157659	BPTF	N.S.
0	NA	NA	NA	NA	NA	BPY2	N.S.
0	NA	NA	NA	NA	NA	BPY2B	N.S.
0	NA	NA	NA	NA	NA	BPY2C	N.S.
2371.28	-0.0326974	0.121277	-0.26961	0.78746	0.856871	BRAF	N.S.
2941.8	0.195647	0.0933608	2.0956	0.0361181	0.0771916	BRAP	N.S.
7278.36	-0.508547	0.132642	-3.83398	0.000126084	0.000517122	BRAT1	padj<0.05 & Downregulated
1501.95	-1.14678	0.217931	-5.26213	1.42395e-07	9.26153e-07	BRCA1	padj<0.05 & Downregulated
716.365	-0.986532	0.257651	-3.82895	0.000128691	0.000526699	BRCA2	padj<0.05 & Downregulated
1410.41	-0.0518107	0.124217	-0.417098	0.676607	0.7714	BRCC3	N.S.
2982.3	0.182815	0.0777763	2.35052	0.0187471	0.0442434	BRD1	padj<0.05 & Upregulated
26020.4	0.0510421	0.116399	0.438511	0.661016	0.758337	BRD2	N.S.
3929.59	0.176661	0.131026	1.34829	0.177567	0.284508	BRD3	N.S.
7626.32	0.033686	0.100916	0.333801	0.73853	0.819684	BRD4	N.S.
8204.97	0.159526	0.127392	1.25225	0.21048	0.325659	BRD7	N.S.
5457.41	-0.0222878	0.146012	-0.152644	0.878679	0.920342	BRD8	N.S.
2920.26	-0.0524508	0.0894393	-0.58644	0.55758	0.673213	BRD9	N.S.
1.06043	0.822716	1.93423	0.425346	0.670585	0.766439	BRDT	N.S.
3199.63	0.455993	0.142519	3.19952	0.00137656	0.00447582	BRE	padj<0.05 & Upregulated
3483.4	-0.10554	0.140396	-0.75173	0.452213	0.578704	BRF1	N.S.
2250.18	0.0898384	0.132149	0.679825	0.496615	0.618876	BRF2	N.S.
10477.9	0.628464	0.166397	3.77689	0.000158796	0.000639551	BRI3	padj<0.05 & Upregulated
3428.79	-1.3541	0.177453	-7.63071	2.33459e-14	3.0301e-13	BRI3BP	padj<0.05 & Downregulated
269.784	0.298206	0.193302	1.54269	0.122905	0.212604	BRICD5	N.S.
110.548	-0.739399	0.238547	-3.0996	0.00193783	0.00606324	BRINP1	padj<0.05 & Downregulated
3.10956	-1.0772	1.28305	-0.839564	0.401153	0.530098	BRINP2	N.S.
70.252	-3.03245	0.53699	-5.64712	1.63162e-08	1.20614e-07	BRINP3	padj<0.05 & Downregulated
900.808	-1.09773	0.166564	-6.59044	4.38511e-11	4.21837e-10	BRIP1	padj<0.05 & Downregulated
4872.44	-0.417703	0.11532	-3.62211	0.000292207	0.00111699	BRIX1	padj<0.05 & Downregulated
13097.5	0.0710589	0.125704	0.565285	0.57188	0.685377	BRK1	N.S.
4657.14	0.0568483	0.104381	0.544623	0.586013	0.697731	BRMS1	N.S.
1519.43	-0.311474	0.0923425	-3.37303	0.000743469	0.00257847	BRMS1L	padj<0.05 & Downregulated
4806.13	0.494848	0.0964667	5.12973	2.90156e-07	1.81671e-06	BROX	padj<0.05 & Upregulated
2578.74	-0.210986	0.104493	-2.01914	0.0434731	0.0902871	BRPF1	N.S.
3849.28	0.295555	0.0833191	3.54727	0.000389249	0.00144116	BRPF3	padj<0.05 & Upregulated
0.236996	-1.37346	3.53192	-0.388872	0.697371	NA	BRS3	N.S.
1488.12	-0.58927	0.116086	-5.07615	3.85153e-07	2.36478e-06	BRSK1	padj<0.05 & Downregulated
2057.74	-0.562719	0.187427	-3.00234	0.0026791	0.00807111	BRSK2	padj<0.05 & Downregulated
3200.74	0.310913	0.106547	2.91808	0.00352192	0.0102935	BRWD1	padj<0.05 & Upregulated
1688.01	-0.474236	0.174225	-2.72197	0.00648948	0.017719	BRWD3	padj<0.05 & Downregulated
2347.89	-0.493778	0.195354	-2.52761	0.0114842	0.0291426	BSCL2	padj<0.05 & Downregulated
6526.05	0.380218	0.0774039	4.91213	9.00924e-07	5.24867e-06	BSDC1	padj<0.05 & Upregulated
47792.1	0.326026	0.146348	2.22774	0.0258977	0.0583535	BSG	N.S.
512.716	0.536282	0.177335	3.02412	0.00249358	0.00758032	BSN	padj<0.05 & Upregulated
0.960353	0.00117904	2.25761	0.000522252	0.999583	0.999755	BSND	N.S.
0.123055	0.776761	3.53381	0.219808	0.826021	NA	BSPH1	N.S.
1171.15	1.12707	0.307056	3.67057	0.000242006	0.000939721	BSPRY	padj<0.05 & Upregulated
29.5774	-0.507781	0.454485	-1.11727	0.26388	0.387474	BST1	N.S.
12182.4	8.21285	0.299705	27.4031	2.51815e-165	1.02079e-162	BST2	padj<0.05 & Upregulated
0	NA	NA	NA	NA	NA	BSX	N.S.
2837.38	-0.0265641	0.151506	-0.175334	0.860817	0.908487	BTAF1	N.S.
9385.28	-0.149002	0.0873376	-1.70605	0.0879989	0.16225	BTBD1	N.S.
4773.05	0.48166	0.114181	4.21838	2.4606e-05	0.00011462	BTBD10	padj<0.05 & Upregulated
95.1296	4.5497	0.485465	9.37184	7.12817e-21	1.37294e-19	BTBD11	padj<0.05 & Upregulated
9.55602	2.44973	0.671915	3.6459	0.00026646	0.00102713	BTBD16	padj<0.05 & Upregulated
1.46898	4.0176	2.21951	1.81013	0.0702752	0.134804	BTBD17	N.S.
3.1692	-0.19221	1.15056	-0.167059	0.867324	0.912556	BTBD18	N.S.
128.121	0.484978	0.337176	1.43835	0.150334	0.249435	BTBD19	N.S.
9772.86	-0.0764294	0.0896314	-0.852708	0.393821	0.523424	BTBD2	N.S.
5517.88	-0.197374	0.110648	-1.7838	0.0744556	0.141592	BTBD3	N.S.
23.6424	-0.131636	0.44616	-0.295043	0.767961	0.841378	BTBD6	N.S.
3569.39	0.00904687	0.0949222	0.0953083	0.92407	0.951247	BTBD7	N.S.
23.5739	0.121599	0.55983	0.217206	0.828048	0.884797	BTBD8	N.S.
1595.9	0.418953	0.0938843	4.46244	8.10318e-06	4.09766e-05	BTBD9	padj<0.05 & Upregulated
40.3894	1.87252	0.60275	3.10662	0.00189237	0.0059402	BTC	padj<0.05 & Upregulated
542.69	0.551814	0.118009	4.67604	2.92468e-06	1.5798e-05	BTD	padj<0.05 & Upregulated
47477.5	-0.129636	0.15215	-0.852025	0.3942	0.523648	BTF3	N.S.
6091.12	-0.100917	0.107536	-0.938448	0.348014	0.478447	BTF3L4	N.S.
2937.25	0.835612	0.242881	3.44041	0.000580823	0.00207381	BTG1	padj<0.05 & Upregulated
[truncated: 17,900 more rows]

## Sheet: B-BIN67_proteomics
uniprot	name	n_peptides	log2_FC	p	p.fdr	Significance
A0A0B4J2D5	GATD3B	8	-0.126279	0.0428182	0.240752	N.S.
A0A1B0GTH6	CSNKA2IP	1	0.0231488	0.848608	1	N.S.
A0A1B0GVH7	IQCM	1	-0.202917	0.134005	0.495557	N.S.
A0AVT1	UBA6	33	-0.00365165	1	1	N.S.
A0FGR8	ESYT2	9	0.05972	0.817064	1	N.S.
A0JLT2	MED19	1	-0.00874773	0.927419	1	N.S.
A0MZ66	SHTN1	9	-0.0176729	0.998697	1	N.S.
A1L0T0	ILVBL	8	0.0735834	0.514851	0.986138	N.S.
A1L188	NDUFAF8	1	0.152796	0.146469	0.520688	N.S.
A1X283	SH3PXD2B	12	0.153581	0.00268076	0.0320516	p.fdr<0.05 & Upregulated
A1XBS5	FAM92A	1	0.210062	0.308989	0.783001	N.S.
A2RRP1	NBAS	2	0.0272292	0.865908	1	N.S.
A3KMH1	VWA8	9	-0.0627121	0.736597	1	N.S.
A3KN83	SBNO1	1	-0.258349	0.0431016	0.241057	N.S.
A4D1E9	GTPBP10	3	-0.259444	0.00232307	0.0288595	p.fdr<0.05 & Downregulated
A4D1P6	WDR91	2	-0.146479	0.1882	0.603821	N.S.
A5PLN9	TRAPPC13	2	-0.078866	0.62341	1	N.S.
A5YKK6	CNOT1	21	-0.00373945	1	1	N.S.
A6NCE7	MAP1LC3B2	1	-0.118239	0.280354	0.746784	N.S.
A6NDB9	PALM3	1	0.0308655	0.774764	1	N.S.
A6NDG6	PGP	7	-0.104303	0.132249	0.491175	N.S.
A6NDU8	C5orf51	5	0.00475116	0.999666	1	N.S.
A6NED2	RCCD1	1	0.0283929	0.780982	1	N.S.
A6NFE2	SMCO2	1	0.0542676	0.774272	1	N.S.
A6NGG8	PCARE	1	0.591219	0.00758165	0.0723668	N.S.
A6NHL2	TUBAL3	1	-0.0484564	0.656908	1	N.S.
A6NHR9	SMCHD1	34	-0.0567284	0.820364	1	N.S.
A6NIH7	UNC119B	2	-0.0724856	0.586306	1	N.S.
A6NJ78	METTL15	1	-0.0877094	0.487292	0.963315	N.S.
A8K979	ERI2	1	-0.0762768	0.449154	0.928631	N.S.
A8MVJ9	Putative histone PARylation factor 1-like OS=Homo sapiens OX=9606 PE=5 SV=1	1	0.203885	0.239197	0.680248	N.S.
A8MXV4	NUDT19	3	-0.00753113	0.989829	1	N.S.
A8MZ25	Putative uncharacterized protein FLJ38767 OS=Homo sapiens OX=9606 PE=5 SV=1	1	-0.0250855	0.82264	1	N.S.
A8MZF0	PRR33	1	0.143989	0.306073	0.779059	N.S.
A9UHW6	MIF4GD	2	0.0944435	0.438867	0.920656	N.S.
A9Z1Z3	FER1L4	1	0.222191	0.0508128	0.268562	N.S.
B5ME19	EIF3CL	25	0.0284214	0.99879	1	N.S.
B7ZAP0	RABGAP1L	2	-0.0315698	0.879308	1	N.S.
B8ZZ34	SHISA8	1	-0.00891823	0.929271	1	N.S.
C9JLW8	MCRIP1	5	-0.198388	0.045448	0.249998	N.S.
E0CX11	STMP1	1	-0.141179	0.288831	0.758569	N.S.
E9PAV3	NACA	6	-0.101886	0.450157	0.929632	N.S.
E9PRG8	C11orf98	5	-0.082013	0.371469	0.853692	N.S.
H7BZ55	CROCC2	1	-0.198266	0.0655994	0.317304	N.S.
L0R6Q1	SLC35A4	4	-0.0558595	0.685375	1	N.S.
L0R819	ASDURF	1	-0.189568	0.110536	0.4395	N.S.
O00115	DNASE2	9	-0.120518	0.162703	0.555968	N.S.
O00116	AGPS	21	0.0355888	0.995272	1	N.S.
O00139	KIF2A	17	0.0411657	0.9493	1	N.S.
O00142	TK2	1	0.0361091	0.790202	1	N.S.
O00148	DDX39A	7	-0.198869	0.00554717	0.0568312	N.S.
O00151	PDLIM1	12	0.460941	3.43546e-14	2.16208e-12	p.fdr<0.05 & Upregulated
O00154	ACOT7	15	-0.0619834	0.672683	1	N.S.
O00159	MYO1C	43	0.0986627	0.0161116	0.127095	N.S.
O00161	SNAP23	8	-0.0161927	0.997208	1	N.S.
O00165	HAX1	2	-0.0512607	0.718673	1	N.S.
O00170	AIP	8	-0.0712063	0.542227	1	N.S.
O00178	GTPBP1	8	0.118583	0.0804176	0.360369	N.S.
O00186	STXBP3	13	-0.0205028	0.997507	1	N.S.
O00192	ARVCF	1	0.258093	0.180419	0.59077	N.S.
O00193	SMAP	4	-0.121747	0.307751	0.782223	N.S.
O00203	AP3B1	28	-0.0340561	0.995929	1	N.S.
O00214	LGALS8	4	0.485039	6.53594e-07	1.94955e-05	p.fdr<0.05 & Upregulated
O00217	NDUFS8	9	-0.0887956	0.294126	0.76358	N.S.
O00220	TNFRSF10A	1	0.0531315	0.584511	1	N.S.
O00221	NFKBIE	1	0.31263	0.0876909	0.381308	N.S.
O00231	PSMD11	28	-0.0810232	0.244574	0.688292	N.S.
O00232	PSMD12	25	-0.0997491	0.0858902	0.375491	N.S.
O00233	PSMD9	8	0.0222438	0.987389	1	N.S.
O00244	ATOX1	5	0.104565	0.184442	0.597792	N.S.
O00258	WRB	1	0.0828772	0.500293	0.974902	N.S.
O00264	PGRMC1	5	0.0115105	0.993684	1	N.S.
O00267	SUPT5H	22	-0.0431911	0.963693	1	N.S.
O00268	TAF4	2	0.00828407	0.790062	1	N.S.
O00273	DFFA	14	-0.113097	0.0648564	0.314773	N.S.
O00287	RFXAP	2	-0.00688507	0.995958	1	N.S.
O00291	HIP1	5	0.114039	0.104975	0.427273	N.S.
O00299	CLIC1	18	0.074694	0.594832	1	N.S.
O00303	EIF3F	11	0.000362112	1	1	N.S.
O00330	PDHX	8	-0.148531	0.0102801	0.0904365	N.S.
O00399	DCTN6	2	-0.0275261	0.848523	1	N.S.
O00401	WASL	6	-0.00281139	1	1	N.S.
O00409	FOXN3	1	0.226205	0.08535	0.3737	N.S.
O00410	IPO5	33	0.0112981	1	1	N.S.
O00411	POLRMT	7	-0.11367	0.161533	0.553619	N.S.
O00418	EEF2K	3	0.113524	0.294074	0.76358	N.S.
O00422	SAP18	9	-0.011761	0.999304	1	N.S.
O00425	IGF2BP3	20	-0.0665884	0.844915	1	N.S.
O00429	DNM1L	32	-0.0317465	0.998857	1	N.S.
O00442	RTCA	9	0.0127609	0.998845	1	N.S.
O00443	PIK3C2A	3	0.15419	0.0530103	0.276998	N.S.
O00461	GOLIM4	10	-0.156653	0.010723	0.0934707	N.S.
O00462	MANBA	1	0.0591603	0.696781	1	N.S.
O00468	AGRN	16	0.491954	1.08758e-21	1.44851e-19	p.fdr<0.05 & Upregulated
O00471	EXOC5	12	-0.0083814	0.999992	1	N.S.
O00479	HMGN4	2	-0.302469	0.0183769	0.139212	N.S.
O00483	NDUFA4	5	-0.16953	0.0114879	0.0984899	N.S.
O00487	PSMD14	11	0.0250893	0.986412	1	N.S.
O00488	ZNF593	2	-0.0421031	0.294964	0.765063	N.S.
O00499	BIN1	2	0.346603	0.00866924	0.079438	N.S.
O00505	KPNA3	5	-0.195212	0.00683601	0.0673835	N.S.
O00506	STK25	1	0.0885269	0.48012	0.954803	N.S.
O00512	BCL9	1	-0.147479	0.201773	0.624624	N.S.
O00541	PES1	20	-0.0605579	0.75986	1	N.S.
O00559	EBAG9	1	-0.223559	0.352318	0.832738	N.S.
O00560	SDCBP	9	0.0669488	0.553591	1	N.S.
O00562	PITPNM1	1	0.197512	0.0972988	0.406441	N.S.
O00566	MPHOSPH10	12	-0.183698	0.000915514	0.0132738	p.fdr<0.05 & Downregulated
O00567	NOP56	24	-0.0148644	0.999998	1	N.S.
O00571	DDX3X	43	-0.120091	0.00160457	0.0210766	p.fdr<0.05 & Downregulated
O00584	RNASET2	4	-0.168164	0.0275302	0.183759	N.S.
O00592	PODXL	6	2.079	1.42249e-19	1.42923e-17	p.fdr<0.05 & Upregulated
O00622	CYR61	3	0.355697	0.00056274	0.00875763	p.fdr<0.05 & Upregulated
O00625	PIR	10	-0.0544304	0.687148	1	N.S.
O00629	KPNA4	6	-0.0425898	0.885277	1	N.S.
O00712	NFIB	2	-0.192651	0.0342222	0.207039	N.S.
O00743	PPP6C	4	-0.037643	0.870413	1	N.S.
O00746	NME4	1	-0.132834	0.217794	0.652948	N.S.
O00748	CES2	1	1.29269	7.32499e-06	0.000177755	p.fdr<0.05 & Upregulated
O00754	MAN2B1	11	0.0861079	0.218173	0.653149	N.S.
O00764	PDXK	6	0.308568	2.56346e-05	0.000547797	p.fdr<0.05 & Upregulated
O00767	SCD	1	-0.311401	0.0116101	0.0989453	N.S.
O14497	ARID1A	15	0.0320468	0.985812	1	N.S.
O14519	CDK2AP1	2	0.0557819	0.649148	1	N.S.
O14521	SDHD	1	-0.154914	0.135078	0.498448	N.S.
O14523	C2CD2L	1	-0.438162	0.00152168	0.0202196	p.fdr<0.05 & Downregulated
O14524	NEMP1	3	-0.0239676	0.933918	1	N.S.
O14530	TXNDC9	9	-0.0862225	0.247269	0.693506	N.S.
O14531	DPYSL4	5	0.0270133	0.947683	1	N.S.
O14545	TRAFD1	4	0.0925893	0.371674	0.85371	N.S.
O14548	COX7A2L	5	-0.183058	0.0094672	0.0849509	N.S.
O14561	NDUFAB1	4	-0.115513	0.216332	0.6507	N.S.
O14562	UBFD1	7	0.0116291	0.997821	1	N.S.
O14578	CIT	4	-0.103414	0.244479	0.688292	N.S.
O14579	COPE	9	0.0260435	0.976215	1	N.S.
O14613	CDC42EP2	3	0.263963	0.0314556	0.197529	N.S.
O14617	AP3D1	24	-0.045324	0.947064	1	N.S.
O14618	CCS	4	0.12099	0.150749	0.529252	N.S.
O14640	DVL1	1	0.241583	0.064912	0.314776	N.S.
O14641	DVL2	2	0.00475243	0.917077	1	N.S.
O14646	CHD1	3	0.0360489	0.873406	1	N.S.
O14647	CHD2	2	-0.0589867	0.630041	1	N.S.
O14653	GOSR2	5	0.0876889	0.273341	0.733907	N.S.
O14656	TOR1A	3	-0.0710173	0.479662	0.954803	N.S.
O14657	TOR1B	5	0.0954396	0.478811	0.954803	N.S.
O14662	STX16	2	0.112033	0.329191	0.807054	N.S.
O14672	ADAM10	5	0.20362	0.0107393	0.0934707	N.S.
O14681	EI24	2	-0.0422442	0.723601	1	N.S.
O14686	KMT2D	1	-0.0136262	0.887947	1	N.S.
O14727	APAF1	2	-0.0248422	0.830848	1	N.S.
O14733	MAP2K7	1	0.0745899	0.475709	0.954295	N.S.
O14734	ACOT8	1	-0.251759	0.115748	0.453724	N.S.
O14737	PDCD5	7	-0.235076	0.000579901	0.00887993	p.fdr<0.05 & Downregulated
O14744	PRMT5	22	-0.0860222	0.272219	0.733302	N.S.
O14745	SLC9A3R1	9	0.184652	0.00321664	0.0370658	p.fdr<0.05 & Upregulated
O14757	CHEK1	2	0.133974	0.128614	0.481785	N.S.
O14763	TNFRSF10B	3	-0.216144	0.0365877	0.216913	N.S.
O14772	FPGT	1	-0.0878516	0.499568	0.974902	N.S.
O14773	TPP1	4	0.111981	0.218901	0.653962	N.S.
O14776	TCERG1	22	-0.0386535	0.981089	1	N.S.
O14777	NDC80	5	-0.0904291	0.428375	0.911616	N.S.
O14787	TNPO2	5	-0.00711752	0.998607	1	N.S.
O14802	POLR3A	7	-0.0840569	0.347574	0.828362	N.S.
O14818	PSMA7	15	-0.0777566	0.408521	0.896055	N.S.
O14828	SCAMP3	7	-0.0372999	0.938347	1	N.S.
O14832	PHYH	1	0.00862473	0.931956	1	N.S.
O14879	IFIT3	6	2.9106	5.03484e-26	8.0096e-24	p.fdr<0.05 & Upregulated
O14880	MGST3	1	0.100746	0.443683	0.92631	N.S.
O14893	GEMIN2	2	0.0267549	0.872641	1	N.S.
O14907	TAX1BP3	3	0.116318	0.189803	0.606487	N.S.
O14908	GIPC1	10	-0.123584	0.202961	0.626646	N.S.
O14920	IKBKB	5	0.0188238	0.992096	1	N.S.
O14925	TIMM23	3	-0.0552506	0.630904	1	N.S.
O14929	HAT1	10	-0.113759	0.158208	0.545488	N.S.
O14933	UBE2L6	3	0.992491	3.025e-08	1.10345e-06	p.fdr<0.05 & Upregulated
O14936	CASK	2	0.00902938	0.991078	1	N.S.
O14949	UQCRQ	2	0.0256296	0.874927	1	N.S.
O14950	MYL12B	7	0.267345	1.52541e-05	0.000338605	p.fdr<0.05 & Upregulated
O14957	UQCR11	1	0.00206752	0.987709	1	N.S.
O14964	HGS	18	0.00850404	1	1	N.S.
O14966	RAB29	3	0.0786687	0.39479	0.882154	N.S.
O14967	CLGN	3	0.0697507	0.494184	0.969575	N.S.
O14972	DSCR3	3	0.00202058	0.999229	1	N.S.
O14974	PPP1R12A	21	-0.0194343	0.999947	1	N.S.
O14976	GAK	12	-0.0482342	0.877463	1	N.S.
O14979	HNRNPDL	13	-0.0765457	0.715081	1	N.S.
O14980	XPO1	31	-0.0594049	0.922588	1	N.S.
O14981	BTAF1	8	-0.0243271	0.979015	1	N.S.
O15013	ARHGEF10	2	0.0124027	0.991409	1	N.S.
O15014	ZNF609	1	0.0696629	0.500677	0.974902	N.S.
O15027	SEC16A	10	-0.0153067	0.998374	1	N.S.
O15031	PLXNB2	9	0.135424	0.0622725	0.305338	N.S.
O15042	U2SURP	15	-0.0893231	0.904758	1	N.S.
O15047	SETD1A	2	-0.0434119	0.845299	1	N.S.
O15056	SYNJ2	1	0.245787	0.0556771	0.285093	N.S.
O15061	SYNM	1	0.352792	0.00577648	0.0584486	N.S.
O15066	KIF3B	6	-0.0753042	0.544908	1	N.S.
O15067	PFAS	28	-0.0603174	0.795958	1	N.S.
O15084	ANKRD28	1	0.123969	0.333385	0.811152	N.S.
O15085	ARHGEF11	2	-0.0669386	0.55434	1	N.S.
O15091	KIAA0391	3	-0.112268	0.220851	0.656023	N.S.
O15111	CHUK	2	-0.243445	0.0219664	0.158042	N.S.
O15116	LSM1	3	0.0250823	0.932802	1	N.S.
O15118	NPC1	4	-0.0142879	0.976951	1	N.S.
O15121	DEGS1	2	-0.0138953	0.922811	1	N.S.
O15126	SCAMP1	4	-0.055268	0.663745	1	N.S.
O15127	SCAMP2	4	-0.0113779	0.988418	1	N.S.
O15143	ARPC1B	10	-0.0764061	0.447927	0.927295	N.S.
O15144	ARPC2	16	-0.0458228	0.962666	1	N.S.
O15145	ARPC3	9	-0.0578713	0.857338	1	N.S.
O15155	BET1	1	0.0440788	0.657622	1	N.S.
O15160	POLR1C	5	-0.0546328	0.826172	1	N.S.
O15162	PLSCR1	1	1.40103	2.0321e-06	5.5951e-05	p.fdr<0.05 & Upregulated
O15164	TRIM24	2	-0.162233	0.104508	0.426295	N.S.
O15173	PGRMC2	3	0.115868	0.198721	0.622625	N.S.
O15212	PFDN6	10	-0.127787	0.0370132	0.218305	N.S.
O15213	WDR46	10	-0.0195643	0.99622	1	N.S.
O15226	NKRF	12	-0.0557168	0.795175	1	N.S.
O15228	GNPAT	3	-0.166237	0.0384798	0.2226	N.S.
O15230	LAMA5	7	0.23526	0.00312525	0.0361582	p.fdr<0.05 & Upregulated
O15231	ZNF185	1	0.0948785	0.532221	1	N.S.
O15234	CASC3	1	0.0385184	0.721972	1	N.S.
O15235	MRPS12	3	-0.122488	0.265763	0.724901	N.S.
O15239	NDUFA1	1	-0.254316	0.029067	0.188524	N.S.
O15254	ACOX3	2	-0.0238498	0.824591	1	N.S.
O15258	RER1	3	0.00937874	0.983318	1	N.S.
O15260	SURF4	1	0.0498716	0.636952	1	N.S.
O15269	SPTLC1	9	0.0561258	0.711542	1	N.S.
O15270	SPTLC2	5	-0.0695938	0.503525	0.977712	N.S.
O15294	OGT	14	-0.0559403	0.760122	1	N.S.
O15305	PMM2	10	-0.112597	0.100424	0.41676	N.S.
O15321	TM9SF1	1	0.049	0.646179	1	N.S.
O15344	MID1	22	-0.327327	6.6255e-14	4.03662e-12	p.fdr<0.05 & Downregulated
O15347	HMGB3	7	-0.0527671	0.758585	1	N.S.
O15354	GPR37	1	0.122235	0.346307	0.827755	N.S.
O15355	PPM1G	18	-0.113024	0.217924	0.652948	N.S.
O15357	INPPL1	11	-0.0132677	0.999492	1	N.S.
O15371	EIF3D	21	-0.00424552	1	1	N.S.
O15372	EIF3H	13	-0.0472113	0.923959	1	N.S.
O15379	HDAC3	1	0.199752	0.193027	0.614829	N.S.
O15381	NVL	7	-0.0642979	0.638961	1	N.S.
O15382	BCAT2	9	-0.0341151	0.938451	1	N.S.
O15397	IPO8	1	0.0152521	0.902829	1	N.S.
O15400	STX7	6	-0.0255117	0.952079	1	N.S.
O15439	ABCC4	7	-0.105072	0.140566	0.509831	N.S.
O15440	ABCC5	1	-0.0181119	0.852647	1	N.S.
O15446	CD3EAP	6	-0.00802409	0.999878	1	N.S.
O15460	P4HA2	21	0.104725	0.0638608	0.311525	N.S.
O15498	YKT6	5	-0.0907347	0.439226	0.921072	N.S.
O15511	ARPC5	7	-0.0463803	0.781992	1	N.S.
O15514	POLR2D	4	-0.0190242	0.991511	1	N.S.
O15530	PDPK1	2	0.169549	0.255932	0.706714	N.S.
O15533	TAPBP	4	0.5207	3.36159e-07	1.03505e-05	p.fdr<0.05 & Upregulated
O15541	RNF113A	5	-0.142379	0.0569079	0.288318	N.S.
O43143	DHX15	30	-0.0883613	0.109913	0.438546	N.S.
O43148	RNMT	7	0.0392417	0.890189	1	N.S.
O43149	ZZEF1	3	0.0294818	0.863866	1	N.S.
O43159	RRP8	6	0.00651397	0.999778	1	N.S.
O43164	PJA2	1	0.046849	0.651578	1	N.S.
O43166	SIPA1L1	2	0.401949	0.00360172	0.0404549	p.fdr<0.05 & Upregulated
O43169	CYB5B	4	0.11658	0.461898	0.942861	N.S.
O43172	PRPF4	12	0.0134289	0.999762	1	N.S.
O43175	PHGDH	21	-0.0384081	0.991232	1	N.S.
O43181	NDUFS4	6	-0.148717	0.030214	0.192048	N.S.
O43182	ARHGAP6	1	-0.0143334	0.889469	1	N.S.
O43237	DYNC1LI2	12	-0.029567	0.993202	1	N.S.
O43242	PSMD3	27	-0.0563078	0.917135	1	N.S.
O43251	RBFOX2	4	0.0552711	0.675954	1	N.S.
O43252	PAPSS1	17	0.00101847	1	1	N.S.
O43264	ZW10	7	-0.093996	0.312603	0.787281	N.S.
O43290	SART1	13	-0.0247967	0.992978	1	N.S.
O43291	SPINT2	3	0.252874	0.0337079	0.206188	N.S.
O43292	GPAA1	2	0.00180763	0.991062	1	N.S.
O43293	DAPK3	3	0.105598	0.235075	0.67689	N.S.
O43299	AP5Z1	2	-0.01592	0.924238	1	N.S.
O43301	HSPA12A	7	0.0886907	0.225485	0.663442	N.S.
O43303	CCP110	1	0.0412214	0.701873	1	N.S.
O43314	PPIP5K2	6	-0.00821586	0.998074	1	N.S.
O43318	MAP3K7	4	0.0788831	0.490064	0.965794	N.S.
O43324	EEF1E1	4	-0.136134	0.0706441	0.333299	N.S.
O43325	LYRM1	1	-0.0607905	0.56807	1	N.S.
O43347	MSI1	1	-0.0171921	0.894002	1	N.S.
O43353	RIPK2	3	0.132923	0.108663	0.435793	N.S.
O43390	HNRNPR	20	-0.0126252	0.999998	1	N.S.
O43395	PRPF3	17	-0.127449	0.0375063	0.219855	N.S.
O43396	TXNL1	11	-0.0511944	0.887304	1	N.S.
O43399	TPD52L2	13	-0.0749939	0.406515	0.894396	N.S.
O43402	EMC8	5	-0.0987252	0.293258	0.762768	N.S.
O43414	ERI3	3	-0.0298263	0.91206	1	N.S.
O43427	FIBP	1	0.127547	0.455109	0.934867	N.S.
O43432	EIF4G3	10	-0.0205402	0.994432	1	N.S.
O43447	PPIH	7	-0.157831	0.0200574	0.147543	N.S.
O43448	KCNAB3	1	0.032695	0.732184	1	N.S.
O43464	HTRA2	6	0.169582	0.00746329	0.0714753	N.S.
O43488	AKR7A2	10	-0.00754617	0.999961	1	N.S.
O43491	EPB41L2	35	0.129265	0.000578882	0.00887993	p.fdr<0.05 & Upregulated
O43502	RAD51C	1	0.0119935	0.930893	1	N.S.
O43504	LAMTOR5	2	0.00556845	0.992126	1	N.S.
O43567	RNF13	3	0.0367494	0.842478	1	N.S.
O43570	CA12	3	-0.105356	0.35574	0.836189	N.S.
O43572	AKAP10	3	-0.0983758	0.288286	0.758184	N.S.
O43583	DENR	6	-0.0826855	0.631641	1	N.S.
O43592	XPOT	3	0.079983	0.482783	0.958038	N.S.
O43598	DNPH1	10	0.00475435	0.999996	1	N.S.
O43615	TIMM44	15	-0.169726	5.35648e-05	0.00106075	p.fdr<0.05 & Downregulated
O43617	TRAPPC3	3	0.101045	0.278574	0.743886	N.S.
O43633	CHMP2A	5	-0.193972	0.0115642	0.0987994	N.S.
O43639	NCK2	1	0.00881519	0.927987	1	N.S.
O43657	TSPAN6	1	0.0795489	0.442943	0.925815	N.S.
O43660	PLRG1	6	0.0173261	0.990091	1	N.S.
O43663	PRC1	2	-0.0266663	0.694126	1	N.S.
O43665	RGS10	6	-0.0582436	0.752743	1	N.S.
O43670	ZNF207	4	0.0049124	0.999073	1	N.S.
O43674	NDUFB5	3	-0.221669	0.0306542	0.193985	N.S.
O43676	NDUFB3	4	-0.145549	0.0752567	0.347297	N.S.
O43678	NDUFA2	5	-0.0522538	0.762987	1	N.S.
O43681	ASNA1	12	-0.0899655	0.204405	0.629186	N.S.
O43684	BUB3	11	-0.0270783	0.981041	1	N.S.
O43692	PI15	8	-0.339802	2.60199e-08	9.61394e-07	p.fdr<0.05 & Downregulated
O43707	ACTN4	35	0.851914	3.1748e-61	1.51517e-58	p.fdr<0.05 & Upregulated
O43708	GSTZ1	4	-0.0967482	0.267841	0.727323	N.S.
O43709	BUD23	4	-0.162422	0.0578105	0.291444	N.S.
O43715	TRIAP1	1	-0.413125	0.0056424	0.0574983	N.S.
O43716	GATC	3	-0.104283	0.231024	0.671108	N.S.
O43719	HTATSF1	8	0.0545398	0.720739	1	N.S.
O43731	KDELR3	1	-0.219467	0.239035	0.680248	N.S.
O43741	PRKAB2	1	0.00211494	0.982929	1	N.S.
O43747	AP1G1	8	-0.042648	0.890552	1	N.S.
O43752	STX6	2	-0.0419609	0.740101	1	N.S.
O43759	SYNGR1	1	-0.034275	0.74511	1	N.S.
O43765	SGTA	10	-0.0507934	0.843465	1	N.S.
O43768	ENSA	5	-0.340582	0.000480839	0.00764935	p.fdr<0.05 & Downregulated
O43772	SLC25A20	7	0.00233942	0.999995	1	N.S.
O43776	NARS	25	-0.0617376	0.782239	1	N.S.
O43795	MYO1B	1	0.438599	0.00191581	0.024274	p.fdr<0.05 & Upregulated
O43805	SSNA1	2	-0.200206	0.0492771	0.263255	N.S.
O43808	SLC25A17	1	0.218647	0.193537	0.615427	N.S.
O43809	NUDT21	9	-0.0295633	0.964922	1	N.S.
O43813	LANCL1	7	0.0018628	0.999998	1	N.S.
O43815	STRN	11	-0.0274241	0.987418	1	N.S.
O43818	RRP9	5	0.133746	0.125117	0.476428	N.S.
O43819	SCO2	3	-0.130041	0.102893	0.422232	N.S.
O43823	AKAP8	5	-0.0753972	0.435449	0.918195	N.S.
O43824	GTPBP6	4	0.013287	0.985905	1	N.S.
O43837	IDH3B	14	-0.152779	0.0032594	0.0374831	p.fdr<0.05 & Downregulated
O43847	NRDC	10	-0.0780435	0.409138	0.896289	N.S.
O43852	CALU	20	-0.0258389	0.99891	1	N.S.
O43865	AHCYL1	8	-0.00888581	0.99962	1	N.S.
O43896	KIF1C	4	-0.00555208	0.997972	1	N.S.
O43913	ORC5	3	-0.0536499	0.789666	1	N.S.
O43916	CHST1	1	0.30871	0.0331988	0.204221	N.S.
O43920	NDUFS5	4	-0.0215019	0.958423	1	N.S.
O43924	PDE6D	1	0.130094	0.29246	0.761506	N.S.
O43929	ORC4	6	-0.130431	0.0630566	0.30839	N.S.
O60216	RAD21	11	0.0446049	0.968196	1	N.S.
O60220	TIMM8A	6	-0.192849	0.0106981	0.0934707	N.S.
O60231	DHX16	3	-0.0520009	0.706564	1	N.S.
O60232	SSSCA1	4	-0.0425815	0.800711	1	N.S.
O60242	ADGRB3	1	0.00506394	0.966096	1	N.S.
O60244	MED14	3	-0.0732524	0.42867	0.911616	N.S.
O60256	PRPSAP2	10	-0.107213	0.131594	0.490014	N.S.
O60264	SMARCA5	19	-0.0653117	0.615146	1	N.S.
O60271	SPAG9	19	-0.0832191	0.317014	0.792651	N.S.
O60287	URB1	1	0.220341	0.046603	0.252264	N.S.
O60293	ZFC3H1	1	-0.0123652	0.906029	1	N.S.
O60306	AQR	7	-0.0241273	0.970185	1	N.S.
O60313	OPA1	26	-0.0931898	0.100879	0.418042	N.S.
O60318	MCM3AP	1	-0.0386264	0.693593	1	N.S.
O60333	KIF1B	2	-0.0806534	0.491862	0.967232	N.S.
O60341	KDM1A	14	-0.0233115	0.995689	1	N.S.
O60343	TBC1D4	3	-0.0658553	0.566523	1	N.S.
O60427	FADS1	3	-0.0621865	0.551119	1	N.S.
O60437	PPL	5	1.45164	4.86004e-16	3.52322e-14	p.fdr<0.05 & Upregulated
O60443	GSDME	5	0.0309312	0.929723	1	N.S.
O60476	MAN1A2	1	-0.213889	0.0627214	0.307013	N.S.
O60488	ACSL4	4	0.15813	0.108585	0.435793	N.S.
O60493	SNX3	9	-0.149563	0.032358	0.201648	N.S.
O60499	STX10	2	-0.0334339	0.759754	1	N.S.
O60502	MGEA5	12	0.000358399	1	1	N.S.
O60504	SORBS3	3	0.369471	0.00949338	0.0849509	N.S.
O60506	SYNCRIP	21	-0.161322	0.000109773	0.00200852	p.fdr<0.05 & Downregulated
O60508	CDC40	1	-0.181575	0.105395	0.427781	N.S.
O60518	RANBP6	1	0.0865649	0.483906	0.959594	N.S.
O60524	NEMF	5	-0.1165	0.122671	0.470237	N.S.
O60547	GMDS	4	0.243501	0.00280742	0.033288	p.fdr<0.05 & Upregulated
O60551	NMT2	1	0.039155	0.691307	1	N.S.
O60563	CCNT1	1	-0.0998748	0.392043	0.878802	N.S.
O60566	BUB1B	1	-0.0424832	0.696316	1	N.S.
O60568	PLOD3	13	-0.0195967	0.999494	1	N.S.
O60573	EIF4E2	3	0.0918988	0.346827	0.82796	N.S.
O60583	CCNT2	1	-0.179268	0.149793	0.527487	N.S.
O60602	TLR5	1	0.200691	0.223657	0.661446	N.S.
O60610	DIAPH1	25	-0.107956	0.0253826	0.174798	N.S.
O60613	SELENOF	3	0.0248486	0.920215	1	N.S.
O60637	TSPAN3	1	-0.0272086	0.807857	1	N.S.
O60641	SNAP91	1	-0.411278	0.00604744	0.0606544	N.S.
O60645	EXOC3	8	0.0769082	0.480756	0.955341	N.S.
O60664	PLIN3	15	0.122682	0.0485034	0.259849	N.S.
O60678	PRMT3	8	-0.133869	0.107231	0.433082	N.S.
O60684	KPNA6	9	0.0120981	0.999637	1	N.S.
O60701	UGDH	29	-0.0467396	0.917337	1	N.S.
O60704	TPST2	1	0.322612	0.08126	0.362725	N.S.
O60716	CTNND1	32	-0.0214562	0.999994	1	N.S.
O60725	ICMT	1	-0.0953184	0.344382	0.825397	N.S.
O60739	EIF1B	1	-0.275826	0.0402065	0.229345	N.S.
O60749	SNX2	17	-0.0660625	0.477877	0.954796	N.S.
O60762	DPM1	8	-0.0518351	0.726211	1	N.S.
O60763	USO1	28	-0.106281	0.0833362	0.367694	N.S.
O60783	MRPS14	1	-0.0661362	0.529863	0.998199	N.S.
O60784	TOM1	7	0.137827	0.0546204	0.281659	N.S.
O60814	HIST1H2BK	2	-0.198442	0.0615475	0.303194	N.S.
O60825	PFKFB2	3	-0.146478	0.0663513	0.319613	N.S.
O60826	CCDC22	12	0.0933966	0.206861	0.633809	N.S.
O60828	PQBP1	3	-0.170308	0.0503008	0.266981	N.S.
O60830	TIMM17B	2	-0.0455395	0.697344	1	N.S.
O60831	PRAF2	2	0.0981253	0.391031	0.878802	N.S.
O60832	DKC1	17	-0.0826354	0.429884	0.911616	N.S.
O60841	EIF5B	36	-0.0773077	0.476036	0.954295	N.S.
O60869	EDF1	4	-0.00634107	0.997464	1	N.S.
O60870	KIN	1	0.231933	0.0642254	0.313037	N.S.
O60884	DNAJA2	19	-0.115123	0.057687	0.291078	N.S.
O60885	BRD4	2	-0.094354	0.331125	0.80868	N.S.
O60888	CUTA	5	0.00684821	0.998805	1	N.S.
O60890	OPHN1	1	0.582094	0.0158026	0.125002	N.S.
O60911	CTSV	4	0.372078	0.000246698	0.00413112	p.fdr<0.05 & Upregulated
O60921	HUS1	2	0.0504588	0.652229	1	N.S.
O60925	PFDN1	6	-0.139591	0.0300927	0.19176	N.S.
O60927	PPP1R11	1	-0.0280448	0.79534	1	N.S.
O60934	NBN	7	-0.00310439	0.999985	1	N.S.
O60936	NOL3	1	0.655355	0.00244602	0.029805	p.fdr<0.05 & Upregulated
O60942	RNGTT	8	-0.109789	0.11621	0.454748	N.S.
O75027	ABCB7	2	0.060832	0.581169	1	N.S.
O75037	KIF21B	1	0.0301789	0.77723	1	N.S.
O75044	SRGAP2	5	0.279237	0.00631546	0.0629019	N.S.
O75056	SDC3	1	-0.187133	0.31419	0.789196	N.S.
O75063	FAM20B	2	0.52367	0.00014919	0.00264524	p.fdr<0.05 & Upregulated
O75083	WDR1	31	0.0138225	1	1	N.S.
O75093	SLIT1	1	0.0347766	0.749911	1	N.S.
O75096	LRP4	2	-0.00749547	0.973151	1	N.S.
O75110	ATP9A	4	0.0138252	0.97997	1	N.S.
O75113	N4BP1	1	0.0578037	0.56185	1	N.S.
O75116	ROCK2	20	-0.0297351	0.998728	1	N.S.
O75122	CLASP2	8	-0.0876162	0.44614	0.926476	N.S.
O75131	CPNE3	23	-0.10156	0.107732	0.434492	N.S.
O75146	HIP1R	4	0.043898	0.746373	1	N.S.
O75150	RNF40	14	-0.131954	0.0212919	0.154504	N.S.
O75151	PHF2	1	-0.0142647	0.897846	1	N.S.
O75152	ZC3H11A	11	-0.134163	0.00895112	0.0813699	N.S.
O75153	CLUH	21	-0.0812091	0.201342	0.624301	N.S.
O75155	CAND2	10	0.0389164	0.909894	1	N.S.
O75157	TSC22D2	4	-0.181606	0.0508765	0.268562	N.S.
O75165	DNAJC13	12	0.004278	1	1	N.S.
O75170	PPP6R2	4	0.132229	0.0871853	0.379415	N.S.
O75175	CNOT3	7	-0.0313718	0.937729	1	N.S.
O75177	SS18L1	1	-0.016971	0.859567	1	N.S.
O75179	ANKRD17	8	-0.0509248	0.844016	1	N.S.
O75190	DNAJB6	4	-0.167425	0.0225664	0.160944	N.S.
O75208	COQ9	3	-0.224007	0.00838461	0.0779524	N.S.
O75223	GGCT	7	-0.0409686	0.849695	1	N.S.
O75251	NDUFS7	5	-0.0589224	0.597191	1	N.S.
O75298	RTN2	1	-0.0945557	0.430499	0.912221	N.S.
O75306	NDUFS2	13	-0.085329	0.421131	0.90611	N.S.
O75312	ZPR1	16	-0.133832	0.0536938	0.279534	N.S.
O75323	NIPSNAP2	6	-0.132117	0.0556705	0.285093	N.S.
O75330	HMMR	4	-0.0716211	0.607152	1	N.S.
O75339	CILP	1	-0.13897	0.278523	0.743886	N.S.
O75340	PDCD6	7	-0.0661612	0.639396	1	N.S.
O75347	TBCA	13	-0.0892637	0.169453	0.56858	N.S.
O75348	ATP6V1G1	4	-0.00127163	0.999947	1	N.S.
O75351	VPS4B	10	-0.0602056	0.601066	1	N.S.
O75352	MPDU1	1	-0.00308091	0.97812	1	N.S.
O75362	ZNF217	4	-0.0210854	0.9591	1	N.S.
O75367	H2AFY	15	-0.0312468	0.983432	1	N.S.
O75368	SH3BGRL	9	0.0172578	0.997762	1	N.S.
O75369	FLNB	118	0.845215	8.576e-189	4.9115e-185	p.fdr<0.05 & Upregulated
O75376	NCOR1	4	0.128809	0.1203	0.465825	N.S.
O75380	NDUFS6	5	-0.0706004	0.448279	0.927295	N.S.
O75381	PEX14	3	-0.156682	0.0481171	0.25838	N.S.
O75382	TRIM3	5	-0.0163652	0.986482	1	N.S.
O75390	CS	21	-0.0505986	0.875356	1	N.S.
O75391	SPAG7	5	-0.0837005	0.31935	0.794422	N.S.
O75394	MRPL33	2	0.0391169	0.824188	1	N.S.
O75396	SEC22B	10	0.021863	0.993402	1	N.S.
O75400	PRPF40A	19	-0.0610118	0.708647	1	N.S.
O75410	TACC1	1	0.0545261	0.704058	1	N.S.
O75427	LRCH4	1	0.311569	0.0300598	0.19176	N.S.
O75431	MTX2	10	-0.0368202	0.957685	1	N.S.
O75436	VPS26A	8	0.0433781	0.849765	1	N.S.
O75438	NDUFB1	1	-0.0711238	0.514187	0.985798	N.S.
O75439	PMPCB	20	-0.0341649	0.99099	1	N.S.
O75446	SAP30	1	0.092031	0.353749	0.834393	N.S.
O75448	MED24	2	0.056419	0.698688	1	N.S.
O75449	KATNA1	1	0.06927	0.584772	1	N.S.
O75475	PSIP1	15	-0.106225	0.0398804	0.228395	N.S.
O75477	ERLIN1	11	-0.0518768	0.768455	1	N.S.
O75486	SUPT3H	1	0.0728067	0.467986	0.947887	N.S.
O75487	GPC4	14	0.0614199	0.633582	1	N.S.
O75489	NDUFS3	11	-0.0866554	0.270282	0.730489	N.S.
O75494	SRSF10	5	-0.0328253	0.897723	1	N.S.
O75503	CLN5	6	-0.0285592	0.942336	1	N.S.
O75506	HSBP1	3	-0.139463	0.271106	0.732025	N.S.
O75521	ECI2	13	-0.0929998	0.204332	0.629186	N.S.
O75525	KHDRBS3	2	0.309289	0.00775713	0.0735515	N.S.
O75529	TAF5L	1	0.227103	0.0865937	0.377414	N.S.
O75530	EED	4	-0.121709	0.187472	0.602159	N.S.
O75531	BANF1	9	0.0114571	0.999794	1	N.S.
O75533	SF3B1	37	-0.0389362	0.994811	1	N.S.
O75534	CSDE1	31	-0.173307	8.96447e-08	3.05592e-06	p.fdr<0.05 & Downregulated
O75554	WBP4	1	-0.254686	0.0323047	0.201648	N.S.
O75563	SKAP2	1	0.055251	0.596339	1	N.S.
O75569	PRKRA	11	-0.0562303	0.723994	1	N.S.
O75586	MED6	1	-0.222748	0.249355	0.695709	N.S.
O75600	GCAT	1	0.0870926	0.41162	0.896859	N.S.
O75607	NPM3	6	-0.0946655	0.490992	0.966411	N.S.
O75608	LYPLA1	9	-0.0354214	0.917615	1	N.S.
O75616	ERAL1	4	-0.262539	0.000620976	0.00947823	p.fdr<0.05 & Downregulated
O75629	CREG1	3	-0.0339387	0.81734	1	N.S.
O75643	SNRNP200	48	-0.00486996	1	1	N.S.
O75648	TRMU	1	0.127754	0.321928	0.796407	N.S.
O75663	TIPRL	9	-0.0742863	0.587585	1	N.S.
O75665	OFD1	1	0.0671208	0.531169	0.999345	N.S.
O75674	TOM1L1	4	-0.110215	0.211618	0.641914	N.S.
O75683	SURF6	6	-0.0413859	0.771759	1	N.S.
O75688	PPM1B	5	0.0359224	0.915013	1	N.S.
O75689	ADAP1	1	-0.118282	0.345053	0.826137	N.S.
O75691	UTP20	12	-0.0324091	0.976872	1	N.S.
O75694	NUP155	19	-0.0750298	0.445246	0.926476	N.S.
O75695	RP2	6	-0.0312035	0.920808	1	N.S.
O75717	WDHD1	13	-0.255464	7.79819e-06	0.000185312	p.fdr<0.05 & Downregulated
O75718	CRTAP	16	-0.0637521	0.710627	1	N.S.
O75746	SLC25A12	19	-0.0819006	0.24754	0.693573	N.S.
O75781	PALM	6	0.363633	7.69e-06	0.000183503	p.fdr<0.05 & Upregulated
O75787	ATP6AP2	2	0.0169481	0.887951	1	N.S.
O75792	RNASEH2A	4	-0.215781	0.0110904	0.0956551	N.S.
O75794	CDC123	8	-0.22062	0.000143634	0.00256258	p.fdr<0.05 & Downregulated
O75817	POP7	3	-0.0321653	0.843151	1	N.S.
O75818	RPP40	1	0.0403829	0.694435	1	N.S.
O75821	EIF3G	13	-0.105247	0.111454	0.441424	N.S.
O75822	EIF3J	15	-0.139232	0.00782568	0.0739778	N.S.
O75832	PSMD10	7	-0.0530273	0.725674	1	N.S.
O75844	ZMPSTE24	9	-0.092393	0.179819	0.589909	N.S.
O75864	PPP1R37	1	0.264141	0.0916158	0.390132	N.S.
O75874	IDH1	18	-0.118264	0.0257253	0.17602	N.S.
O75879	GATB	5	-0.046102	0.741774	1	N.S.
O75880	SCO1	4	0.00178996	0.999865	1	N.S.
O75884	RBBP9	3	0.0760112	0.446333	0.926476	N.S.
O75886	STAM2	7	-0.0528715	0.757175	1	N.S.
O75896	TUSC2	1	0.0190999	0.913696	1	N.S.
O75901	RASSF9	2	0.106358	0.249002	0.695537	N.S.
O75909	CCNK	1	0.0112153	0.913207	1	N.S.
O75915	ARL6IP5	5	-0.0169423	0.980086	1	N.S.
O75934	BCAS2	11	-0.0486057	0.869555	1	N.S.
O75935	DCTN3	8	-0.0519012	0.833008	1	N.S.
O75937	DNAJC8	9	-0.111302	0.236791	0.67689	N.S.
O75940	SMNDC1	6	-0.162387	0.0361667	0.214861	N.S.
O75947	ATP5H	15	-0.204863	3.46222e-06	9.1374e-05	p.fdr<0.05 & Downregulated
O75953	DNAJB5	1	-0.219835	0.0862571	0.376233	N.S.
O75955	FLOT1	19	0.0138307	0.999991	1	N.S.
O75962	TRIO	4	0.195001	0.0104344	0.0916533	N.S.
O75964	ATP5L	7	-0.148059	0.013352	0.110342	N.S.
O75970	MPDZ	3	-0.0147369	0.969545	1	N.S.
O75976	CPD	22	-0.1258	0.00798106	0.0748077	N.S.
O76003	GLRX3	15	-0.042411	0.922908	1	N.S.
O76021	RSL1D1	18	-0.107158	0.0995375	0.414003	N.S.
O76024	WFS1	3	0.0481894	0.757454	1	N.S.
O76031	CLPX	17	-0.191447	2.74125e-05	0.000579304	p.fdr<0.05 & Downregulated
O76041	NEBL	1	0.0139294	0.921528	1	N.S.
O76054	SEC14L2	4	1.23734	1.07859e-10	4.90246e-09	p.fdr<0.05 & Upregulated
O76062	TM7SF2	1	-0.115914	0.347385	0.828362	N.S.
O76070	SNCG	2	3.66572	6.60511e-12	3.20572e-10	p.fdr<0.05 & Upregulated
O76071	CIAO1	4	-0.0693361	0.52231	0.993117	N.S.
O76094	SRP72	32	-0.0517464	0.884769	1	N.S.
O94760	DDAH1	2	0.116268	0.194944	0.616479	N.S.
O94763	URI1	5	-0.0531908	0.733198	1	N.S.
O94766	B3GAT3	4	0.0269326	0.918673	1	N.S.
O94776	MTA2	14	-0.0407002	0.939072	1	N.S.
O94782	USP1	1	-0.195684	0.0950996	0.399293	N.S.
O94788	ALDH1A2	1	0.0973046	0.350576	0.831365	N.S.
O94804	STK10	8	0.114868	0.0916579	0.390132	N.S.
O94817	ATG12	1	-0.0704192	0.503877	0.977712	N.S.
O94822	LTN1	3	-0.192859	0.0733408	0.342876	N.S.
O94826	TOMM70	25	-0.0902746	0.0766008	0.350793	N.S.
O94829	IPO13	1	0.0274821	0.793914	1	N.S.
O94830	DDHD2	2	0.187867	0.137225	0.503775	N.S.
O94842	TOX4	6	-0.0925896	0.388599	0.876819	N.S.
O94854	KIAA0754	1	0.173527	0.179847	0.589909	N.S.
O94855	SEC24D	7	0.0222482	0.981585	1	N.S.
O94874	UFL1	19	0.00234814	1	1	N.S.
O94876	TMCC1	3	-0.00978736	0.983699	1	N.S.
O94880	PHF14	1	0.0147904	0.881963	1	N.S.
O94887	FARP2	1	-0.109935	0.278414	0.743886	N.S.
O94888	UBXN7	4	-0.024361	0.926155	1	N.S.
O94901	SUN1	14	0.0130053	0.999958	1	N.S.
O94903	PLPBP	6	0.0231989	0.964315	1	N.S.
O94905	ERLIN2	14	-0.0783357	0.308247	0.782223	N.S.
O94906	PRPF6	20	0.00216452	1	1	N.S.
O94913	PCF11	1	-0.0699959	0.4935	0.969332	N.S.
O94915	FRYL	1	-0.0518644	0.598041	1	N.S.
O94916	NFAT5	4	0.0308098	0.895598	1	N.S.
O94919	ENDOD1	6	0.0300731	0.923758	1	N.S.
O94925	GLS	20	0.216527	7.1938e-07	2.12365e-05	p.fdr<0.05 & Upregulated
O94927	HAUS5	1	0.0949982	0.350159	0.831065	N.S.
O94964	SOGA1	2	-0.132905	0.171367	0.572589	N.S.
O94966	USP19	4	-0.00435283	0.997074	1	N.S.
O94973	AP2A2	17	0.0830275	0.245012	0.689187	N.S.
O94979	SEC31A	32	-0.0189686	1	1	N.S.
O94992	HEXIM1	11	0.000249141	1	1	N.S.
O95059	RPP14	1	0.0218806	0.861953	1	N.S.
O95070	YIF1A	1	0.0130369	0.9206	1	N.S.
O95071	UBR5	15	0.0172671	0.999945	1	N.S.
O95081	AGFG2	4	0.109293	0.223777	0.661446	N.S.
O95104	SCAF4	5	-0.0304485	0.896593	1	N.S.
O95139	NDUFB6	3	-0.205224	0.0126801	0.105858	N.S.
O95140	MFN2	6	0.00681841	0.999977	1	N.S.
O95149	SNUPN	1	0.0769204	0.568706	1	N.S.
O95155	UBE4B	6	-0.0149602	0.991353	1	N.S.
O95159	ZFPL1	4	0.122654	0.255461	0.706656	N.S.
O95163	ELP1	5	-0.18961	0.00926689	0.0838412	N.S.
O95166	GABARAP	1	-0.308357	0.0295687	0.190056	N.S.
O95167	NDUFA3	3	-0.0896798	0.360892	0.841678	N.S.
O95168	NDUFB4	6	0.049857	0.86197	1	N.S.
O95169	NDUFB8	5	-0.0091673	0.996935	1	N.S.
O95171	SCEL	1	0.891471	0.00485461	0.0511072	N.S.
O95178	NDUFB2	1	0.0888152	0.476398	0.954295	N.S.
O95182	NDUFA7	7	-0.0984687	0.149353	0.52652	N.S.
O95197	RTN3	2	-0.119591	0.236019	0.67689	N.S.
O95202	LETM1	27	-0.14813	7.29767e-06	0.000177755	p.fdr<0.05 & Downregulated
O95208	EPN2	1	0.117077	0.278211	0.743886	N.S.
O95210	STBD1	1	-0.0543868	0.674602	1	N.S.
O95218	ZRANB2	2	-0.140148	0.642912	1	N.S.
O95219	SNX4	12	0.0258331	0.99105	1	N.S.
O95229	ZWINT	1	-0.0927612	0.445964	0.926476	N.S.
O95232	LUC7L3	12	-0.0891428	0.478947	0.954803	N.S.
O95235	KIF20A	1	-0.120652	0.266678	0.726242	N.S.
O95248	SBF1	1	0.268418	0.142953	0.514254	N.S.
O95249	GOSR1	3	0.0119091	0.972192	1	N.S.
O95251	KAT7	2	0.0729191	0.575167	1	N.S.
O95260	ATE1	1	-0.0170484	0.876204	1	N.S.
O95292	VAPB	10	-0.0834277	0.355591	0.836189	N.S.
O95295	SNAPIN	4	0.0686588	0.546607	1	N.S.
O95297	MPZL1	4	0.0298232	0.914898	1	N.S.
O95298	NDUFC2	3	-0.0619263	0.564326	1	N.S.
O95299	NDUFA10	14	-0.14155	0.0056019	0.0572894	N.S.
O95302	FKBP9	15	-0.0590936	0.636053	1	N.S.
O95319	CELF2	7	0.0229304	0.972321	1	N.S.
O95336	PGLS	14	0.0656571	0.585326	1	N.S.
O95340	PAPSS2	6	0.0306486	0.926828	1	N.S.
O95347	SMC2	31	-0.233191	1.57163e-12	8.25756e-11	p.fdr<0.05 & Downregulated
O95352	ATG7	2	0.0233621	0.915074	1	N.S.
O95359	TACC2	1	0.188879	0.0747784	0.346385	N.S.
O95361	TRIM16	1	2.47779	7.70637e-07	2.2633e-05	p.fdr<0.05 & Upregulated
O95363	FARS2	2	-0.012049	0.96738	1	N.S.
O95372	LYPLA2	9	-0.0920263	0.20858	0.636409	N.S.
O95373	IPO7	13	-0.0102215	0.99998	1	N.S.
O95376	ARIH2	1	0.0705811	0.514622	0.98603	N.S.
O95391	SLU7	1	0.325103	0.048139	0.25838	N.S.
O95394	PGM3	15	0.033969	0.989699	1	N.S.
O95396	MOCS3	1	0.276785	0.017523	0.134523	N.S.
O95400	CD2BP2	8	-0.110512	0.0837979	0.368595	N.S.
O95425	SVIL	5	1.38385	2.2612e-15	1.5058e-13	p.fdr<0.05 & Upregulated
O95427	PIGN	2	0.0861095	0.556304	1	N.S.
O95429	BAG4	2	0.00871232	0.987625	1	N.S.
O95433	AHSA1	21	-0.110551	0.0240473	0.168427	N.S.
O95445	APOM	2	0.085627	0.603912	1	N.S.
O95453	PARN	12	-0.123968	0.0544416	0.28165	N.S.
O95456	PSMG1	6	-0.0869043	0.469045	0.948787	N.S.
O95470	SGPL1	12	0.154852	0.00574208	0.0583065	N.S.
O95477	ABCA1	1	-0.00814176	0.974276	1	N.S.
O95478	NSA2	5	-0.0859058	0.447623	0.927295	N.S.
O95479	H6PD	6	0.212264	0.0036397	0.040712	p.fdr<0.05 & Upregulated
O95486	SEC24A	8	0.0509085	0.841453	1	N.S.
O95487	SEC24B	4	0.0334501	0.871056	1	N.S.
O95490	ADGRL2	25	-0.273042	1.87502e-10	8.19711e-09	p.fdr<0.05 & Downregulated
O95498	VNN2	1	0.0564723	0.557278	1	N.S.
O95563	MPC2	1	-0.171994	0.110276	0.439187	N.S.
O95571	ETHE1	11	0.166356	0.114505	0.450541	N.S.
O95573	ACSL3	19	0.0755782	0.577656	1	N.S.
O95602	POLR1A	14	-0.127144	0.0148439	0.120242	N.S.
O95613	PCNT	1	0.13803	0.223696	0.661446	N.S.
O95628	CNOT4	3	0.0381442	0.791008	1	N.S.
O95630	STAMBP	8	0.00396013	0.999996	1	N.S.
O95639	CPSF4	5	-0.0181183	0.982969	1	N.S.
O95671	ASMTL	12	-0.0819804	0.40872	0.896149	N.S.
O95674	CDS2	2	0.0806295	0.392335	0.878802	N.S.
O95684	FGFR1OP	1	-0.251109	0.119779	0.464438	N.S.
O95707	POP4	3	-0.0387154	0.770663	1	N.S.
O95714	HERC2	4	0.201835	0.0299099	0.191604	N.S.
O95721	SNAP29	8	-0.0275733	0.966627	1	N.S.
O95747	OXSR1	13	0.07292	0.551594	1	N.S.
O95749	GGPS1	2	-0.0224546	0.873691	1	N.S.
O95757	HSPA4L	32	-0.115927	0.0198137	0.146669	N.S.
O95758	PTBP3	4	-0.0145991	1	1	N.S.
O95777	LSM8	4	0.0728922	0.534569	1	N.S.
O95782	AP2A1	18	0.117622	0.0568804	0.288318	N.S.
O95785	WIZ	8	-0.104781	0.158981	0.547164	N.S.
O95786	DDX58	14	1.20315	1.4017e-31	3.64888e-29	p.fdr<0.05 & Upregulated
O95793	STAU1	10	-0.0509867	0.76347	1	N.S.
O95801	TTC4	6	-0.0587375	0.696122	1	N.S.
O95816	BAG2	8	0.0899635	0.258237	0.711705	N.S.
O95817	BAG3	8	0.120194	0.093524	0.395372	N.S.
O95819	MAP4K4	10	0.150001	0.0425363	0.240005	N.S.
O95822	MLYCD	2	0.166002	0.241245	0.684644	N.S.
O95825	CRYZL1	6	-0.00306834	0.999976	1	N.S.
O95831	AIFM1	18	-0.0972182	0.0879532	0.381308	N.S.
O95834	EML2	3	0.0660372	0.539648	1	N.S.
O95861	BPNT1	11	-0.0586127	0.630081	1	N.S.
O95865	DDAH2	10	0.101663	0.32089	0.795877	N.S.
O95870	ABHD16A	3	0.298728	0.00543552	0.0559878	N.S.
O95881	TXNDC12	7	-0.147452	0.0213205	0.154504	N.S.
O95900	TRUB2	1	0.0362913	0.73437	1	N.S.
O95905	ECD	3	0.0446323	0.789781	1	N.S.
O95926	SYF2	1	-0.293455	0.0458342	0.250709	N.S.
O95931	CBX7	1	-0.221288	0.0455297	0.249998	N.S.
O95983	MBD3	3	0.0817833	0.481677	0.956838	N.S.
O95985	TOP3B	3	-0.0203229	0.937069	1	N.S.
O95989	NUDT3	2	-0.0499456	0.908828	1	N.S.
O95999	BCL10	3	0.0020585	0.999119	1	N.S.
O96000	NDUFB10	12	-0.156341	0.00425787	0.0458361	p.fdr<0.05 & Downregulated
O96005	CLPTM1	4	-0.0733914	0.515087	0.986259	N.S.
O96006	ZBED1	1	0.102133	0.375782	0.858437	N.S.
O96007	MOCS2	2	0.125605	0.238922	0.680248	N.S.
O96008	TOMM40	9	-0.151818	0.0200691	0.147543	N.S.
O96011	PEX11B	2	0.100455	0.398228	0.884659	N.S.
O96013	PAK4	6	-0.0597395	0.635733	1	N.S.
O96017	CHEK2	2	-0.0265077	0.80941	1	N.S.
O96019	ACTL6A	11	-0.0468117	0.818629	1	N.S.
O96028	NSD2	3	-0.0756164	0.477392	0.954796	N.S.
O96033	MOCS2	2	-0.238054	0.0228298	0.162418	N.S.
P00167	CYB5A	2	0.0485349	0.702798	1	N.S.
P00338	LDHA	24	0.0421964	0.998953	1	N.S.
P00352	ALDH1A1	27	-0.139338	0.00152654	0.0202372	p.fdr<0.05 & Downregulated
P00367	GLUD1	9	0.0248798	0.991255	1	N.S.
P00374	DHFR	5	-0.318871	8.42893e-06	0.000197838	p.fdr<0.05 & Downregulated
P00387	CYB5R3	16	0.053885	0.82504	1	N.S.
P00390	GSR	20	-0.0195314	0.999983	1	N.S.
P00395	MT-CO1	2	-0.00802005	0.971059	1	N.S.
P00403	MT-CO2	5	-0.011606	0.992558	1	N.S.
P00441	SOD1	10	0.0314538	0.961992	1	N.S.
P00488	F13A1	2	0.014358	0.952165	1	N.S.
P00491	PNP	8	-0.131749	0.0325423	0.202303	N.S.
P00492	HPRT1	13	-0.0546342	0.806343	1	N.S.
P00505	GOT2	24	-0.198981	2.35611e-07	7.49635e-06	p.fdr<0.05 & Downregulated
P00533	EGFR	1	-0.039784	0.764047	1	N.S.
P00558	PGK1	24	-0.079533	0.284575	0.75382	N.S.
P00568	AK1	10	-0.096427	0.189341	0.606212	N.S.
P00734	F2	7	0.0917181	0.41936	0.904506	N.S.
P00740	F9	1	0.12491	0.471581	0.949844	N.S.
P00747	PLG	2	0.101734	0.278679	0.743886	N.S.
P00813	ADA	1	0.217014	0.0565778	0.287667	N.S.
P00846	MT-ATP6	1	-0.195834	0.0736527	0.3436	N.S.
P00918	CA2	15	-0.522486	9.80844e-22	1.33745e-19	p.fdr<0.05 & Downregulated
P00966	ASS1	1	-0.0528803	0.70373	1	N.S.
P01023	A2M	6	0.0922307	0.272965	0.733907	N.S.
P01024	C3	7	0.165774	0.00800592	0.0749181	N.S.
P01034	CST3	1	0.141851	0.211281	0.641342	N.S.
P01042	KNG1	1	0.240895	0.128627	0.481785	N.S.
P01111	NRAS	1	-0.190658	0.0887683	0.383102	N.S.
P01116	KRAS	1	-0.173738	0.178933	0.588597	N.S.
P01130	LDLR	7	-0.00249105	0.999998	1	N.S.
P01889	HLA-B	3	1.45332	1.81708e-10	8.00492e-09	p.fdr<0.05 & Upregulated
P01892	HLA-A	9	0.967197	3.14453e-18	2.90464e-16	p.fdr<0.05 & Upregulated
P02042	HBD	1	-0.0222338	0.878602	1	N.S.
P02100	HBE1	1	-0.0124281	0.924826	1	N.S.
P02461	COL3A1	9	-0.143772	0.0199367	0.147326	N.S.
P02511	CRYAB	19	0.37934	4.07084e-12	2.0098e-10	p.fdr<0.05 & Upregulated
P02533	KRT14	1	1.85919	3.71606e-05	0.000762791	p.fdr<0.05 & Upregulated
P02538	KRT6A	20	3.55457	3.14478e-67	2.25127e-64	p.fdr<0.05 & Upregulated
P02545	LMNA	58	0.481428	6.11337e-62	3.50112e-59	p.fdr<0.05 & Upregulated
P02649	APOE	17	0.218858	8.9033e-05	0.00167728	p.fdr<0.05 & Upregulated
P02656	APOC3	1	-0.229101	0.0749775	0.346567	N.S.
P02749	APOH	3	-0.135254	0.135641	0.499561	N.S.
P02751	FN1	4	0.220662	0.0542633	0.281236	N.S.
P02765	AHSG	3	0.0966362	0.409297	0.896289	N.S.
P02766	TTR	2	0.143545	0.194182	0.616036	N.S.
P02771	AFP	4	0.171623	0.0306364	0.193985	N.S.
P02774	GC	7	0.0931163	0.194555	0.616479	N.S.
P02786	TFRC	35	-0.33132	3.90315e-27	6.98541e-25	p.fdr<0.05 & Downregulated
P02787	TF	1	0.208617	0.101634	0.419577	N.S.
P02790	HPX	1	0.0940781	0.363613	0.843764	N.S.
P02792	FTL	2	-0.140789	0.245734	0.690877	N.S.
P02794	FTH1	4	0.433969	2.11336e-06	5.79102e-05	p.fdr<0.05 & Upregulated
P02795	MT2A	1	2.50612	9.94686e-08	3.37075e-06	p.fdr<0.05 & Upregulated
P03886	MT-ND1	1	-0.120002	0.314457	0.789521	N.S.
P03915	MT-ND5	1	-0.103182	0.304287	0.777103	N.S.
P03928	MT-ATP8	3	-0.151041	0.0700056	0.331889	N.S.
P04003	C4BPA	1	-0.172509	0.131992	0.490856	N.S.
P04004	VTN	2	-0.10227	0.541929	1	N.S.
P04035	HMGCR	1	-0.0342683	0.777069	1	N.S.
P04040	CAT	15	-0.276177	4.2678e-09	1.69538e-07	p.fdr<0.05 & Downregulated
P04049	RAF1	5	0.00677631	0.998486	1	N.S.
P04062	GBA	11	0.109732	0.0501351	0.266711	N.S.
P04066	FUCA1	7	0.0519459	0.733779	1	N.S.
P04075	ALDOA	21	0.119353	0.108963	0.436691	N.S.
P04080	CSTB	6	0.0617915	0.611373	1	N.S.
P04083	ANXA1	20	0.607428	2.06715e-21	2.51885e-19	p.fdr<0.05 & Upregulated
P04114	APOB	9	0.0424454	0.892593	1	N.S.
P04179	SOD2	9	0.246751	0.000440641	0.00704902	p.fdr<0.05 & Upregulated
P04181	OAT	27	-0.140311	0.000822497	0.0121091	p.fdr<0.05 & Downregulated
P04183	TK1	3	-0.024394	0.909703	1	N.S.
P04216	THY1	3	-0.179009	0.043653	0.243428	N.S.
P04217	A1BG	1	0.288001	0.084568	0.371412	N.S.
P04350	TUBB4A	5	-0.0777631	0.487818	0.964021	N.S.
P04406	GAPDH	29	-0.0196837	1	1	N.S.
P04424	ASL	4	0.0126933	0.984188	1	N.S.
P04626	ERBB2	6	-0.0209842	0.979381	1	N.S.
P04632	CAPNS1	13	0.17479	0.00016358	0.00285617	p.fdr<0.05 & Upregulated
P04792	HSPB1	12	0.409222	9.48207e-12	4.52532e-10	p.fdr<0.05 & Upregulated
P04818	TYMS	6	-0.15724	0.0529133	0.276997	N.S.
P04843	RPN1	37	-0.0550264	0.965938	1	N.S.
P04844	RPN2	16	-0.0546229	0.747355	1	N.S.
P04899	GNAI2	8	0.219582	0.00130391	0.0177797	p.fdr<0.05 & Upregulated
P04920	SLC4A2	5	-0.0735573	0.573212	1	N.S.
P05023	ATP1A1	21	-0.0617465	0.596239	1	N.S.
P05026	ATP1B1	7	-0.205484	0.0112506	0.096745	N.S.
P05067	APP	7	0.159088	0.0266098	0.17971	N.S.
P05089	ARG1	1	-0.117253	0.268165	0.727728	N.S.
P05114	HMGN1	3	-0.193883	0.123746	0.472263	N.S.
P05141	SLC25A5	8	-0.149293	0.0295225	0.190056	N.S.
P05154	SERPINA5	1	0.0403296	0.673771	1	N.S.
P05161	ISG15	6	1.23896	1.82148e-17	1.49023e-15	p.fdr<0.05 & Upregulated
P05165	PCCA	10	-0.0109119	0.999808	1	N.S.
P05166	PCCB	11	0.104559	0.317213	0.792651	N.S.
P05186	ALPL	1	3.49772	6.96666e-08	2.41807e-06	p.fdr<0.05 & Upregulated
P05198	EIF2S1	20	-0.0206452	0.999887	1	N.S.
P05204	HMGN2	1	-0.517425	0.00686806	0.0675734	N.S.
P05230	FGF1	1	3.28503	2.5378e-07	8.02981e-06	p.fdr<0.05 & Upregulated
P05386	RPLP1	4	-0.0930602	0.347544	0.828362	N.S.
P05387	RPLP2	7	-0.149013	0.0208307	0.152359	N.S.
P05388	RPLP0	18	-0.0560844	0.705413	1	N.S.
P05412	JUN	1	0.572338	0.00279152	0.0331682	p.fdr<0.05 & Upregulated
P05423	POLR3D	1	-0.129297	0.215951	0.650238	N.S.
P05452	CLEC3B	3	0.246947	0.0283815	0.186313	N.S.
P05455	SSB	34	-0.0771841	0.881886	1	N.S.
P05543	SERPINA7	1	0.00667246	0.944847	1	N.S.
P05556	ITGB1	24	0.181806	4.85191e-06	0.000124605	p.fdr<0.05 & Upregulated
P05783	KRT18	15	2.84347	2.93104e-47	1.29124e-44	p.fdr<0.05 & Upregulated
P05787	KRT8	20	3.52988	1.14376e-61	5.95485e-59	p.fdr<0.05 & Upregulated
P05937	CALB1	12	-0.00124149	1	1	N.S.
P05997	COL5A2	31	-0.131994	8.99006e-05	0.00168807	p.fdr<0.05 & Downregulated
P06132	UROD	8	0.091337	0.311064	0.785131	N.S.
P06280	GLA	10	-0.0342333	0.944245	1	N.S.
P06400	RB1	5	-0.0609512	0.626412	1	N.S.
P06454	PTMA	2	-0.0486028	0.667823	1	N.S.
P06493	CDK1	8	-0.366128	4.05409e-06	0.000105535	p.fdr<0.05 & Downregulated
P06576	ATP5F1B	33	-0.118996	0.000721753	0.0108206	p.fdr<0.05 & Downregulated
P06730	EIF4E	8	-0.097293	0.158176	0.545488	N.S.
P06733	ENO1	30	0.00934796	1	1	N.S.
P06737	PYGL	40	-0.0118767	1	1	N.S.
P06744	GPI	25	-0.0954201	0.0572854	0.289623	N.S.
P06746	POLB	3	0.0726087	0.460408	0.941692	N.S.
P06748	NPM1	15	-0.11698	0.0796587	0.358652	N.S.
P06753	TPM3	7	0.0812081	0.309451	0.783689	N.S.
P06756	ITGAV	34	0.207285	3.37219e-11	1.58299e-09	p.fdr<0.05 & Upregulated
P06865	HEXA	11	0.0569962	0.831763	1	N.S.
P06899	HIST1H2BJ	2	-0.0692064	0.510838	0.983774	N.S.
P07099	EPHX1	26	0.11753	0.0272375	0.182444	N.S.
P07108	DBI	5	-0.136554	0.099543	0.414003	N.S.
P07148	FABP1	1	0.0934039	0.348433	0.829619	N.S.
P07195	LDHB	20	-0.278804	1.34756e-09	5.55212e-08	p.fdr<0.05 & Downregulated
P07196	NEFL	4	-0.684208	2.32177e-06	6.30178e-05	p.fdr<0.05 & Downregulated
P07197	NEFM	1	0.146173	0.355432	0.836189	N.S.
P07199	CENPB	1	-0.100221	0.381619	0.866931	N.S.
P07203	GPX1	1	-0.0886351	0.385366	0.872329	N.S.
P07205	PGK2	1	-0.0442897	0.649074	1	N.S.
P07237	P4HB	43	-0.112457	0.00278674	0.0331682	p.fdr<0.05 & Downregulated
P07305	H1F0	6	0.185079	0.0130037	0.107949	N.S.
P07311	ACYP1	6	-0.0708526	0.449871	0.929441	N.S.
P07355	ANXA2	39	0.298526	4.27594e-23	6.12207e-21	p.fdr<0.05 & Upregulated
P07384	CAPN1	23	-0.131247	0.00999148	0.0881682	N.S.
P07437	TUBB	5	-0.0712728	0.526552	0.996371	N.S.
P07602	PSAP	29	0.0119108	1	1	N.S.
P07686	HEXB	23	-0.0399288	0.993475	1	N.S.
P07711	CTSL	2	0.123816	0.235943	0.67689	N.S.
P07737	PFN1	12	-0.0770451	0.423439	0.908511	N.S.
P07738	BPGM	8	0.122145	0.309535	0.783689	N.S.
P07741	APRT	16	-0.0466248	0.913635	1	N.S.
P07814	EPRS	75	-0.0732903	0.729289	1	N.S.
P07858	CTSB	10	0.600621	1.89441e-14	1.20548e-12	p.fdr<0.05 & Upregulated
P07900	HSP90AA1	32	0.0214824	0.999999	1	N.S.
P07910	HNRNPC	16	-0.0875572	0.298481	0.769425	N.S.
P07919	UQCRH	2	-0.0440509	0.656825	1	N.S.
P07947	YES1	4	-0.0579061	0.69189	1	N.S.
P07948	LYN	3	0.00922393	0.984064	1	N.S.
P07951	TPM2	9	-0.0832531	0.621017	1	N.S.
P07954	FH	25	-0.20647	2.14302e-10	9.29776e-09	p.fdr<0.05 & Downregulated
P07992	ERCC1	2	-0.131821	0.277263	0.743108	N.S.
P07996	THBS1	21	0.527656	1.27113e-22	1.77555e-20	p.fdr<0.05 & Upregulated
P08047	SP1	4	-0.0505806	0.794944	1	N.S.
P08133	ANXA6	36	0.166499	2.69472e-07	8.4795e-06	p.fdr<0.05 & Upregulated
P08134	RHOC	2	0.118866	0.346784	0.82796	N.S.
P08183	ABCB1	1	-0.0529375	0.714477	1	N.S.
P08195	SLC3A2	22	0.0324807	0.996579	1	N.S.
P08237	PFKM	18	-0.224196	4.40601e-08	1.5576e-06	p.fdr<0.05 & Downregulated
P08238	HSP90AB1	39	-0.0632567	0.778575	1	N.S.
P08240	SRPRA	21	-0.0707175	0.376484	0.858671	N.S.
P08243	ASNS	22	-0.070158	0.560559	1	N.S.
P08247	SYP	1	-0.116195	0.2867	0.757348	N.S.
P08263	GSTA1	1	-0.0126812	0.916416	1	N.S.
P08397	HMBS	10	-0.0975934	0.204194	0.629186	N.S.
P08559	PDHA1	23	0.0125011	1	1	N.S.
P08574	CYC1	7	0.00580497	0.999947	1	N.S.
P08579	SNRPB2	4	-0.0405269	0.781234	1	N.S.
P08621	SNRNP70	18	-0.0245513	0.9987	1	N.S.
P08648	ITGA5	2	0.203342	0.0338099	0.206208	N.S.
P08651	NFIC	1	-0.0232634	0.831711	1	N.S.
P08670	VIM	50	0.188287	3.97674e-08	1.41458e-06	p.fdr<0.05 & Upregulated
P08697	SERPINF2	1	0.190009	0.181844	0.593739	N.S.
P08708	RPS17	10	-0.137125	0.0211584	0.153774	N.S.
P08727	KRT19	1	0.153391	0.148123	0.523642	N.S.
P08754	GNAI3	5	0.0552299	0.795652	1	N.S.
P08758	ANXA5	18	0.378821	1.08521e-15	7.57926e-14	p.fdr<0.05 & Upregulated
P08779	KRT16	3	2.71164	3.91329e-13	2.21895e-11	p.fdr<0.05 & Upregulated
P08865	RPSA	15	-0.0203007	0.998683	1	N.S.
P08962	CD63	4	0.148699	0.0562461	0.287096	N.S.
P09001	MRPL3	6	-0.0994511	0.21229	0.643274	N.S.
P09012	SNRPA	5	0.0627234	0.668365	1	N.S.
P09038	FGF2	7	0.0366674	0.962506	1	N.S.
P09104	ENO2	1	0.185323	0.163479	0.557953	N.S.
P09110	ACAA1	11	0.101444	0.126983	0.47944	N.S.
P09132	SRP19	6	-0.0492315	0.757125	1	N.S.
P09211	GSTP1	14	0.0334529	0.98074	1	N.S.
P09234	SNRPC	4	0.0011599	1	1	N.S.
P09382	LGALS1	15	0.0797727	0.720646	1	N.S.
P09417	QDPR	6	0.0463304	0.764536	1	N.S.
P09429	HMGB1	11	-0.146417	0.0309789	0.195824	N.S.
P09486	SPARC	1	1.02113	0.000749276	0.0111539	p.fdr<0.05 & Upregulated
P09493	TPM1	4	0.568639	9.91e-06	0.000228849	p.fdr<0.05 & Upregulated
P09496	CLTA	9	-0.119641	0.0709058	0.334071	N.S.
P09497	CLTB	8	0.148983	0.0181461	0.137828	N.S.
P09525	ANXA4	20	0.411914	1.73758e-18	1.68664e-16	p.fdr<0.05 & Upregulated
P09543	CNP	22	0.422758	1.18124e-21	1.53749e-19	p.fdr<0.05 & Upregulated
P09601	HMOX1	12	0.711483	2.18611e-12	1.11785e-10	p.fdr<0.05 & Upregulated
P09622	DLD	24	-0.0619695	0.757887	1	N.S.
P09651	HNRNPA1	15	-0.000495754	1	1	N.S.
P09661	SNRPA1	16	-0.0512306	0.874853	1	N.S.
P09668	CTSH	3	0.0610394	0.541489	1	N.S.
P09669	COX6C	5	-0.219914	0.00293387	0.0344309	p.fdr<0.05 & Downregulated
P09874	PARP1	58	-0.102577	0.0780272	0.355216	N.S.
P09884	POLA1	3	0.0400367	0.776623	1	N.S.
P09913	IFIT2	1	2.42053	5.20654e-08	1.82932e-06	p.fdr<0.05 & Upregulated
P09914	IFIT1	7	2.3967	3.50173e-27	6.46916e-25	p.fdr<0.05 & Upregulated
P09936	UCHL1	13	0.0537109	0.726602	1	N.S.
P09960	LTA4H	26	-0.0734519	0.424593	0.909016	N.S.
P09972	ALDOC	2	0.0715905	0.536778	1	N.S.
P0C0S5	H2AFZ	3	-0.0534805	0.636551	1	N.S.
P0C7P0	CISD3	2	-0.0799645	0.453803	0.933523	N.S.
P0C7U0	ELFN1	1	0.0271071	0.817994	1	N.S.
P0CB47	UBTFL1	1	0.397688	0.00425468	0.0458361	p.fdr<0.05 & Upregulated
P0CG08	GPR89B	1	-0.0544532	0.723816	1	N.S.
P0CG12	CHTF8	2	0.0150212	0.920912	1	N.S.
P0CW20	LIMS4	2	0.912804	6.88146e-06	0.000169142	p.fdr<0.05 & Upregulated
P0DI82	TRAPPC2B	1	-0.256555	0.0389037	0.223921	N.S.
P0DMU9	CT45A10	9	-0.304934	2.64028e-05	0.000560032	p.fdr<0.05 & Downregulated
P0DMV9	HSPA1B	42	-0.0601629	0.953369	1	N.S.
P0DN79	CBSL	13	0.0289564	0.983655	1	N.S.
P0DP25	CALM3	13	0.100036	0.234676	0.67689	N.S.
P0DPB6	POLR1D	2	-0.108625	0.313691	0.788823	N.S.
P10109	FDX1	6	-0.498999	1.29717e-09	5.38326e-08	p.fdr<0.05 & Downregulated
P10155	TROVE2	20	0.038248	0.987832	1	N.S.
P10176	COX8A	1	-0.17044	0.101598	0.419577	N.S.
P10243	MYBL1	1	0.107792	0.361926	0.841896	N.S.
P10253	GAA	21	0.104364	0.0693068	0.329394	N.S.
P10301	RRAS	9	0.102205	0.153962	0.536013	N.S.
P10321	HLA-C	4	0.825829	6.94747e-10	2.9256e-08	p.fdr<0.05 & Upregulated
P10398	ARAF	8	-0.0351193	0.932151	1	N.S.
P10515	DLAT	19	-0.104198	0.0387463	0.22369	N.S.
P10586	PTPRF	5	0.101654	0.206777	0.633809	N.S.
P10589	NR2F1	1	-0.00865116	0.927411	1	N.S.
P10599	TXN	8	-0.00431746	0.999997	1	N.S.
P10606	COX5B	7	-0.11351	0.119022	0.463139	N.S.
P10619	CTSA	7	-0.0770076	0.387417	0.875586	N.S.
P10620	MGST1	2	0.0636342	0.571526	1	N.S.
P10636	MAPT	6	-0.117848	0.375283	0.858437	N.S.
P10644	PRKAR1A	17	-0.00824009	0.999999	1	N.S.
P10646	TFPI	3	0.0546824	0.717154	1	N.S.
P10746	UROS	2	-0.074649	0.519928	0.991221	N.S.
P10768	ESD	16	-0.0130431	0.999992	1	N.S.
P10809	HSPD1	62	-0.161401	1.55538e-08	5.822e-07	p.fdr<0.05 & Downregulated
P10915	HAPLN1	4	-0.0550424	0.709369	1	N.S.
P11021	HSPA5	49	-0.0762511	0.709653	1	N.S.
P11047	LAMC1	47	0.0646735	0.927316	1	N.S.
P11117	ACP2	7	0.0760406	0.520222	0.991416	N.S.
P11137	MAP2	22	-0.295775	2.53302e-12	1.28377e-10	p.fdr<0.05 & Downregulated
P11142	HSPA8	34	-0.116928	0.0153556	0.122995	N.S.
P11171	EPB41	1	-0.0180785	0.856934	1	N.S.
P11172	UMPS	18	-0.043194	0.932431	1	N.S.
P11177	PDHB	14	-0.0142613	0.999921	1	N.S.
P11182	DBT	15	-0.0867154	0.185482	0.599127	N.S.
P11216	PYGB	24	0.356539	8.26615e-21	9.2824e-19	p.fdr<0.05 & Upregulated
P11233	RALA	1	0.0872332	0.404039	0.892305	N.S.
P11234	RALB	2	0.040066	0.693252	1	N.S.
P11277	SPTB	1	0.0827284	0.543439	1	N.S.
P11279	LAMP1	8	-0.0666525	0.509238	0.982957	N.S.
P11310	ACADM	10	-0.120964	0.0370099	0.218305	N.S.
P11387	TOP1	23	-0.147056	0.000749825	0.0111539	p.fdr<0.05 & Downregulated
P11388	TOP2A	27	-0.16025	0.000122869	0.0022128	p.fdr<0.05 & Downregulated
P11413	G6PD	19	0.385418	3.99927e-17	3.18108e-15	p.fdr<0.05 & Upregulated
P11441	UBL4A	7	0.0144317	0.996332	1	N.S.
P11498	PC	3	0.110568	0.293927	0.76358	N.S.
P11586	MTHFD1	51	-0.0816824	0.225255	0.663442	N.S.
P11717	IGF2R	49	-0.0534671	0.887522	1	N.S.
P11766	ADH5	12	-0.0421171	0.902267	1	N.S.
P11802	CDK4	7	0.0220154	0.976	1	N.S.
P11831	SRF	1	-0.0903947	0.381187	0.866592	N.S.
P11908	PRPS2	8	-0.13002	0.0529673	0.276998	N.S.
P11940	PABPC1	22	-0.0700984	0.695422	1	N.S.
P12004	PCNA	21	-0.20737	2.57392e-06	6.95322e-05	p.fdr<0.05 & Downregulated
P12036	NEFH	4	-0.348666	0.000158296	0.00277236	p.fdr<0.05 & Downregulated
P12074	COX6A1	1	-0.0458301	0.667068	1	N.S.
P12104	FABP2	1	-0.804539	4.98995e-05	0.00099573	p.fdr<0.05 & Downregulated
P12107	COL11A1	45	-0.248886	2.97285e-20	3.15287e-18	p.fdr<0.05 & Downregulated
P12109	COL6A1	2	0.157386	0.106932	0.43279	N.S.
P12110	COL6A2	1	0.290801	0.0205948	0.15102	N.S.
P12235	SLC25A4	5	-0.037265	0.848758	1	N.S.
P12236	SLC25A6	2	-0.209365	0.0407599	0.231792	N.S.
P12259	F5	13	-0.166543	0.00166312	0.021647	p.fdr<0.05 & Downregulated
P12268	IMPDH2	26	-0.156888	1.13923e-05	0.000259935	p.fdr<0.05 & Downregulated
P12270	TPR	74	-0.0096722	1	1	N.S.
P12277	CKB	19	0.18795	5.13933e-06	0.000130813	p.fdr<0.05 & Upregulated
P12429	ANXA3	1	1.32054	0.000446519	0.00712316	p.fdr<0.05 & Upregulated
P12694	BCKDHA	5	0.0411186	0.866758	1	N.S.
P12814	ACTN1	32	0.470416	3.28867e-34	9.41711e-32	p.fdr<0.05 & Upregulated
P12829	MYL4	1	1.25461	0.000121314	0.00219168	p.fdr<0.05 & Upregulated
P12931	SRC	1	0.262306	0.0930741	0.394549	N.S.
P12955	PEPD	12	-0.017934	0.999648	1	N.S.
P12956	XRCC6	41	-0.0837582	0.475713	0.954295	N.S.
P13010	XRCC5	49	-0.0764829	0.538978	1	N.S.
P13073	COX4I1	7	-0.196347	0.000834245	0.0122506	p.fdr<0.05 & Downregulated
P13284	IFI30	1	0.270267	0.03911	0.224882	N.S.
P13473	LAMP2	5	0.10831	0.287999	0.758184	N.S.
P13489	RNH1	25	0.0188942	0.999981	1	N.S.
P13637	ATP1A3	1	-0.486869	0.0014958	0.0199684	p.fdr<0.05 & Downregulated
P13639	EEF2	69	-0.115548	0.000547761	0.00855706	p.fdr<0.05 & Downregulated
P13667	PDIA4	51	-0.101227	0.00797466	0.0748077	N.S.
P13674	P4HA1	25	-0.136684	0.000260777	0.00435413	p.fdr<0.05 & Downregulated
P13693	TPT1	8	-0.0577318	0.691047	1	N.S.
P13716	ALAD	3	0.0360367	0.846492	1	N.S.
P13797	PLS3	22	0.134755	0.0429648	0.240752	N.S.
P13798	APEH	13	-0.0917292	0.376299	0.858671	N.S.
P13804	ETFA	16	-0.0551516	0.815535	1	N.S.
P13807	GYS1	6	-0.076837	0.419955	0.904506	N.S.
P13861	PRKAR2A	15	-0.0121856	0.999969	1	N.S.
P13929	ENO3	1	0.0880175	0.425006	0.909016	N.S.
P13984	GTF2F2	9	-0.0857523	0.462419	0.942861	N.S.
P13987	CD59	4	0.650182	1.36878e-07	4.50519e-06	p.fdr<0.05 & Upregulated
P13995	MTHFD2	11	-0.171352	0.040178	0.229345	N.S.
P14174	MIF	4	0.0702025	0.527571	0.997192	N.S.
P14210	HGF	12	-0.0458182	0.966486	1	N.S.
P14314	PRKCSH	21	-0.0317475	0.99318	1	N.S.
P14324	FDPS	8	0.00936981	0.999852	1	N.S.
P14373	TRIM27	1	-0.0245077	0.811805	1	N.S.
P14406	COX7A2	2	-0.0476328	0.577513	1	N.S.
P14415	ATP1B2	1	0.133813	0.496989	0.972592	N.S.
P14550	AKR1A1	17	-0.00554997	1	1	N.S.
P14618	PKM	43	0.139615	4.45037e-06	0.000115327	p.fdr<0.05 & Upregulated
P14621	ACYP2	1	-0.0745621	0.44267	0.925582	N.S.
P14625	HSP90B1	57	-0.0555407	0.972657	1	N.S.
P14635	CCNB1	3	-0.24473	0.0147256	0.119622	N.S.
P14649	MYL6B	4	0.180385	0.0243043	0.169538	N.S.
P14678	SNRPB	7	0.0283818	0.956002	1	N.S.
P14735	IDE	16	-0.0794133	0.344588	0.825397	N.S.
P14854	COX6B1	6	-0.0755432	0.451962	0.931914	N.S.
P14859	POU2F1	5	-0.103186	0.182733	0.595963	N.S.
P14866	HNRNPL	19	-0.0911773	0.436512	0.919772	N.S.
P14868	DARS	37	-0.00619455	1	1	N.S.
P14923	JUP	14	0.105581	0.207286	0.633809	N.S.
P14927	UQCRB	9	-0.124055	0.0336459	0.206086	N.S.
P15121	AKR1B1	14	0.116656	0.0388894	0.223921	N.S.
P15151	PVR	2	-0.00345693	0.977915	1	N.S.
P15170	GSPT1	13	-0.0700324	0.757632	1	N.S.
P15289	ARSA	6	0.21598	0.00443014	0.0475037	p.fdr<0.05 & Upregulated
P15291	B4GALT1	3	0.0956451	0.332099	0.809474	N.S.
P15311	EZR	22	0.585021	4.1774e-29	8.24965e-27	p.fdr<0.05 & Upregulated
P15328	FOLR1	1	1.15185	0.000150738	0.00266443	p.fdr<0.05 & Upregulated
P15374	UCHL3	6	0.0914218	0.244184	0.688292	N.S.
P15529	CD46	3	-0.0586833	0.602209	1	N.S.
P15531	NME1	8	-0.149984	0.0314364	0.197529	N.S.
P15586	GNS	12	0.0220047	0.996409	1	N.S.
P15848	ARSB	4	0.00409064	0.99935	1	N.S.
P15880	RPS2	23	-0.115616	0.00790331	0.074494	N.S.
P15882	CHN1	3	-0.164059	0.0386713	0.223482	N.S.
P15924	DSP	6	1.14059	4.83059e-15	3.14373e-13	p.fdr<0.05 & Upregulated
P15927	RPA2	6	-0.077892	0.443499	0.92631	N.S.
P15954	COX7C	2	-0.185615	0.131757	0.4903	N.S.
P16035	TIMP2	1	0.372661	0.00502997	0.0525668	N.S.
P16070	CD44	2	2.20153	1.26954e-10	5.72495e-09	p.fdr<0.05 & Upregulated
P16083	NQO2	6	-0.187858	0.0034642	0.0392861	p.fdr<0.05 & Downregulated
P16152	CBR1	20	-0.276358	1.46158e-10	6.53943e-09	p.fdr<0.05 & Downregulated
P16157	ANK1	1	0.470579	0.00105381	0.0149755	p.fdr<0.05 & Upregulated
P16189	HLA-A	2	0.0110597	0.999019	1	N.S.
P16219	ACADS	2	0.13246	0.183338	0.596579	N.S.
P16220	CREB1	4	-0.00325213	0.998502	1	N.S.
P16233	PNLIP	1	0.0826244	0.409792	0.896364	N.S.
P16278	GLB1	9	0.152027	0.06982	0.331284	N.S.
P16298	PPP3CB	2	0.0541557	0.648654	1	N.S.
P16333	NCK1	11	0.0364645	0.966359	1	N.S.
P16383	GCFC2	3	-0.0518763	0.648743	1	N.S.
P16401	HIST1H1B	8	-0.11314	0.150906	0.529252	N.S.
P16403	HIST1H1C	8	-0.210302	0.000408589	0.0066237	p.fdr<0.05 & Downregulated
P16435	POR	21	0.0521482	0.949657	1	N.S.
P16455	MGMT	6	-0.0165294	0.99155	1	N.S.
P16615	ATP2A2	35	-0.0444078	0.975848	1	N.S.
P16930	FAH	8	-0.1423	0.0621547	0.305021	N.S.
P16949	STMN1	4	-0.0968732	0.622882	1	N.S.
P16989	YBX3	5	-0.120991	0.186143	0.599765	N.S.
P17050	NAGA	11	0.00239171	1	1	N.S.
P17096	HMGA1	2	0.283473	0.00890372	0.0810678	N.S.
P17152	TMEM11	1	-0.159921	0.145169	0.518088	N.S.
P17174	GOT1	18	-0.196796	9.87447e-06	0.000228849	p.fdr<0.05 & Downregulated
P17275	JUNB	1	0.384887	0.00994619	0.0881682	N.S.
P17301	ITGA2	2	0.924703	3.61639e-07	1.10754e-05	p.fdr<0.05 & Upregulated
P17302	GJA1	9	-0.0787659	0.413191	0.897022	N.S.
P17480	UBTF	27	-0.049567	0.936767	1	N.S.
P17516	AKR1C4	3	0.133757	0.312894	0.787669	N.S.
P17568	NDUFB7	2	-0.0542664	0.624407	1	N.S.
P17612	PRKACA	4	-0.0222974	0.941757	1	N.S.
P17655	CAPN2	23	0.524074	3.48775e-31	8.32263e-29	p.fdr<0.05 & Upregulated
P17706	PTPN2	1	0.117204	0.354038	0.834393	N.S.
P17812	CTPS1	13	-0.0182931	0.998864	1	N.S.
P17844	DDX5	33	-0.148342	7.379e-05	0.00143253	p.fdr<0.05 & Downregulated
P17858	PFKL	14	0.0981126	0.126723	0.479169	N.S.
P17900	GM2A	10	-0.10427	0.268944	0.728592	N.S.
P17980	PSMC3	27	-0.0333948	0.995763	1	N.S.
P17987	TCP1	30	-0.0660747	0.713082	1	N.S.
P18031	PTPN1	4	0.139615	0.199164	0.622725	N.S.
P18074	ERCC2	1	0.164438	0.287221	0.757817	N.S.
P18077	RPL35A	9	-0.0355071	0.927522	1	N.S.
P18084	ITGB5	6	0.210129	0.00267256	0.0320204	p.fdr<0.05 & Upregulated
P18085	ARF4	8	-0.0569371	0.745601	1	N.S.
P18124	RPL7	21	-0.0815635	0.321157	0.795877	N.S.
P18206	VCL	78	0.229164	1.05024e-26	1.82264e-24	p.fdr<0.05 & Upregulated
P18583	SON	25	-0.0380957	0.987318	1	N.S.
P18615	NELFE	12	-0.084976	0.45713	0.937337	N.S.
P18621	RPL17	13	-0.125172	0.0397486	0.228097	N.S.
P18627	LAG3	1	0.019912	0.852883	1	N.S.
P18669	PGAM1	18	-0.0506928	0.943075	1	N.S.
P18754	RCC1	17	-0.0100357	0.999999	1	N.S.
P18858	LIG1	13	-0.195983	1.963e-05	0.000430731	p.fdr<0.05 & Downregulated
P18859	ATP5J	5	-0.208026	0.00312024	0.0361582	p.fdr<0.05 & Downregulated
P18887	XRCC1	11	-0.0655703	0.609849	1	N.S.
P19174	PLCG1	4	0.0262382	0.935139	1	N.S.
P19256	CD58	2	-0.0331882	0.797433	1	N.S.
P19338	NCL	33	-0.133629	0.00175212	0.0224987	p.fdr<0.05 & Downregulated
P19367	HK1	30	-0.0425917	0.995024	1	N.S.
P19387	POLR2C	5	-0.0130514	0.991116	1	N.S.
P19388	POLR2E	6	-0.0728139	0.448346	0.927295	N.S.
P19404	NDUFV2	12	-0.11282	0.147195	0.522264	N.S.
P19447	ERCC3	1	0.461206	0.00843178	0.0781333	N.S.
P19474	TRIM21	4	0.91996	3.58118e-11	1.66743e-09	p.fdr<0.05 & Upregulated
P19525	EIF2AK2	21	0.626672	3.49608e-30	7.41558e-28	p.fdr<0.05 & Upregulated
P19532	TFE3	1	-0.184692	0.109954	0.438546	N.S.
P19544	WT1	3	-0.150283	0.236107	0.67689	N.S.
P19623	SRM	12	-0.100234	0.412816	0.897008	N.S.
P19634	SLC9A1	1	0.105453	0.355822	0.836189	N.S.
P19784	CSNK2A2	8	0.0911868	0.54231	1	N.S.
P19823	ITIH2	8	0.231997	0.001302	0.0177797	p.fdr<0.05 & Upregulated
P19827	ITIH1	1	0.235907	0.06795	0.325648	N.S.
P19838	NFKB1	9	0.169092	0.00219168	0.0274656	p.fdr<0.05 & Upregulated
P20020	ATP2B1	4	-0.0421655	0.819485	1	N.S.
P20042	EIF2S2	27	-0.103947	0.51291	0.985385	N.S.
P20073	ANXA7	13	0.0174159	0.999634	1	N.S.
P20290	BTF3	12	-0.0725361	0.527719	0.997192	N.S.
P20337	RAB3B	3	0.0869808	0.406213	0.894074	N.S.
P20338	RAB4A	2	0.0266311	0.837403	1	N.S.
P20339	RAB5A	3	-0.0404488	0.763596	1	N.S.
P20340	RAB6A	3	-0.123402	0.287705	0.758184	N.S.
P20585	MSH3	6	-0.111015	0.160142	0.550169	N.S.
P20618	PSMB1	14	-0.00189344	1	1	N.S.
P20645	M6PR	4	-0.0825942	0.433815	0.916099	N.S.
P20674	COX5A	10	-0.160826	0.00443766	0.0475037	p.fdr<0.05 & Downregulated
P20700	LMNB1	46	-0.00397169	1	1	N.S.
P20742	PZP	1	0.393384	0.0350383	0.21012	N.S.
P20810	CAST	11	0.158419	0.073729	0.3436	N.S.
P20839	IMPDH1	1	-0.0548437	0.66056	1	N.S.
P20933	AGA	3	0.117661	0.291349	0.760509	N.S.
P20936	RASA1	2	-0.20933	0.0901664	0.386225	N.S.
P20962	PTMS	1	-0.308563	0.0374803	0.219855	N.S.
P21127	CDK11B	10	-0.0520005	0.785062	1	N.S.
P21266	GSTM3	14	0.0119904	0.999975	1	N.S.
P21281	ATP6V1B2	19	-0.0416588	0.979002	1	N.S.
P21283	ATP6V1C1	13	-0.172332	0.000279313	0.0046366	p.fdr<0.05 & Downregulated
P21291	CSRP1	10	0.595281	1.5461e-13	9.32055e-12	p.fdr<0.05 & Upregulated
P21333	FLNA	140	0.309551	1.31993e-82	1.25988e-79	p.fdr<0.05 & Upregulated
P21359	NF1	1	-0.0250437	0.806662	1	N.S.
P21399	ACO1	20	-0.340475	9.44691e-17	7.31114e-15	p.fdr<0.05 & Downregulated
P21580	TNFAIP3	1	0.20391	0.232701	0.67409	N.S.
P21589	NT5E	2	2.47112	3.63591e-08	1.30961e-06	p.fdr<0.05 & Upregulated
P21796	VDAC1	20	-0.0666393	0.816528	1	N.S.
P21817	RYR1	1	0.00121938	0.994167	1	N.S.
P21912	SDHB	11	-0.0735311	0.639171	1	N.S.
P21926	CD9	4	0.402092	5.08748e-06	0.000130071	p.fdr<0.05 & Upregulated
P21953	BCKDHB	1	-0.0939162	0.371314	0.85368	N.S.
P21964	COMT	14	0.094136	0.33575	0.813728	N.S.
P21980	TGM2	12	3.09314	1.4966e-34	4.76169e-32	p.fdr<0.05 & Upregulated
P22033	MUT	6	0.0325516	0.975106	1	N.S.
P22059	OSBP	17	-0.0252679	0.998177	1	N.S.
P22061	PCMT1	10	-0.0890259	0.369644	0.851206	N.S.
P22087	FBL	13	-0.0247741	0.997905	1	N.S.
P22102	GART	43	-0.0718833	0.649475	1	N.S.
P22234	PAICS	24	-0.101095	0.146813	0.521264	N.S.
P22307	SCP2	22	-0.0526099	0.795074	1	N.S.
P22314	UBA1	50	-0.00763083	1	1	N.S.
P22352	GPX3	1	-0.15304	0.202973	0.626646	N.S.
P22392	NME2	8	-0.108465	0.194676	0.616479	N.S.
P22570	FDXR	28	-0.0372023	0.992985	1	N.S.
P22626	HNRNPA2B1	21	-0.106253	0.328397	0.806834	N.S.
P22670	RFX1	1	0.6988	7.97173e-05	0.00152689	p.fdr<0.05 & Upregulated
P22681	CBL	8	0.00119096	1	1	N.S.
P22695	UQCRC2	22	-0.070202	0.452675	0.931914	N.S.
P22830	FECH	12	-0.0402963	0.975187	1	N.S.
P22891	PROZ	1	0.00587314	0.967544	1	N.S.
P23025	XPA	1	-0.080081	0.457595	0.937955	N.S.
P23142	FBLN1	3	0.139476	0.136491	0.501722	N.S.
P23193	TCEA1	18	-0.163774	0.000201885	0.00341061	p.fdr<0.05 & Downregulated
P23229	ITGA6	23	-0.159698	0.000120383	0.00218175	p.fdr<0.05 & Downregulated
P23246	SFPQ	28	-0.0426958	0.987541	1	N.S.
P23258	TUBG1	10	-0.0530587	0.777789	1	N.S.
P23284	PPIB	20	-0.111566	0.0453443	0.249939	N.S.
P23368	ME2	25	-0.0965993	0.0475968	0.256191	N.S.
P23378	GLDC	15	-0.0429538	0.901957	1	N.S.
P23381	WARS	16	0.705261	3.92474e-26	6.422e-24	p.fdr<0.05 & Upregulated
P23396	RPS3	24	-0.0690651	0.638958	1	N.S.
P23434	GCSH	2	-0.190736	0.0404259	0.230138	N.S.
P23443	RPS6KB1	5	-0.0198716	0.977251	1	N.S.
P23458	JAK1	3	0.221646	0.0191586	0.143198	N.S.
P23508	MCC	1	0.233557	0.0375961	0.220156	N.S.
P23511	NFYA	1	-0.0876176	0.411235	0.896859	N.S.
P23526	AHCY	25	-0.143187	0.000693473	0.0104789	p.fdr<0.05 & Downregulated
P23528	CFL1	15	-0.136811	0.0254427	0.174798	N.S.
P23588	EIF4B	11	-0.134797	0.0342305	0.207039	N.S.
P23634	ATP2B4	15	0.153701	0.00161486	0.0211632	p.fdr<0.05 & Upregulated
P23743	DGKA	12	0.140299	0.0174656	0.134443	N.S.
P23786	CPT2	13	0.0118283	0.999922	1	N.S.
P23919	DTYMK	10	-0.0587993	0.775318	1	N.S.
P23921	RRM1	21	-0.32152	1.5754e-14	1.01375e-12	p.fdr<0.05 & Downregulated
P24468	NR2F2	1	-0.392531	0.0138341	0.113507	N.S.
P24534	EEF1B2	12	-0.132233	0.00923619	0.0836957	N.S.
P24539	ATP5F1	9	-0.1968	0.00138344	0.0188194	p.fdr<0.05 & Downregulated
P24666	ACP1	9	-0.0494354	0.825342	1	N.S.
P24752	ACAT1	22	-0.205467	8.24693e-07	2.38536e-05	p.fdr<0.05 & Downregulated
P24844	MYL9	6	0.403953	3.55752e-06	9.30316e-05	p.fdr<0.05 & Upregulated
P24928	POLR2A	27	-0.0346442	0.999552	1	N.S.
P24941	CDK2	2	0.0477582	0.738898	1	N.S.
P25054	APC	1	-0.104786	0.434799	0.917499	N.S.
P25098	GRK2	6	-0.0531984	0.688046	1	N.S.
P25205	MCM3	33	-0.137696	0.000193621	0.00328067	p.fdr<0.05 & Downregulated
P25208	NFYB	3	0.131621	0.17519	0.582984	N.S.
P25325	MPST	9	-0.0672353	0.538674	1	N.S.
P25398	RPS12	8	-0.0961625	0.212576	0.643722	N.S.
P25440	BRD2	3	-0.21779	0.0062326	0.0622933	N.S.
P25445	FAS	2	0.149151	0.164114	0.558977	N.S.
P25490	YY1	4	-0.116676	0.247299	0.693506	N.S.
P25685	DNAJB1	14	-0.067386	0.646804	1	N.S.
P25686	DNAJB2	2	0.372	0.00479532	0.0506009	N.S.
P25705	ATP5F1A	42	-0.102416	0.024281	0.169538	N.S.
P25786	PSMA1	14	-0.0727939	0.487057	0.963181	N.S.
P25787	PSMA2	11	0.0105794	0.999948	1	N.S.
P25788	PSMA3	9	-0.104578	0.336598	0.814405	N.S.
P25789	PSMA4	18	-0.0473969	0.98537	1	N.S.
P26006	ITGA3	6	1.61846	3.18418e-17	2.56842e-15	p.fdr<0.05 & Upregulated
P26038	MSN	26	0.596203	1.42426e-39	5.43781e-37	p.fdr<0.05 & Upregulated
P26196	DDX6	18	-0.0899934	0.217931	0.652948	N.S.
P26358	DNMT1	22	-0.184409	1.13096e-05	0.000259081	p.fdr<0.05 & Downregulated
P26367	PAX6	4	-0.0786686	0.446561	0.926613	N.S.
P26368	U2AF2	11	-0.0557648	0.709612	1	N.S.
P26373	RPL13	16	-0.0117504	0.999985	1	N.S.
P26440	IVD	7	0.0742651	0.412333	0.896859	N.S.
P26572	MGAT1	1	0.204696	0.20662	0.633804	N.S.
P26583	HMGB2	5	-0.110928	0.396729	0.884074	N.S.
P26599	PTBP1	16	0.063909	0.608167	1	N.S.
P26639	TARS	30	-0.0261876	0.999919	1	N.S.
P26640	VARS	31	-0.0555866	0.789292	1	N.S.
P26641	EEF1G	21	-0.0661993	0.600984	1	N.S.
P26885	FKBP2	7	-0.0423344	0.885368	1	N.S.
P27105	STOM	4	0.618391	1.42284e-07	4.65634e-06	p.fdr<0.05 & Upregulated
P27144	AK4	5	0.196181	0.0193082	0.143982	N.S.
P27348	YWHAQ	13	-0.0556597	0.92929	1	N.S.
P27361	MAPK3	4	0.154037	0.0505102	0.267596	N.S.
P27448	MARK3	3	-0.122383	0.148121	0.523642	N.S.
P27540	ARNT	1	-0.158638	0.33713	0.815004	N.S.
P27544	CERS1	3	0.0396642	0.81673	1	N.S.
P27635	RPL10	16	-0.051062	0.925606	1	N.S.
P27658	COL8A1	1	-0.0339919	0.749664	1	N.S.
P27694	RPA1	22	-0.13618	0.000878506	0.0128347	p.fdr<0.05 & Downregulated
P27695	APEX1	19	-0.0258248	0.998452	1	N.S.
P27707	DCK	3	-0.208586	0.0332679	0.204426	N.S.
P27708	CAD	50	-0.0998786	0.0258082	0.176377	N.S.
P27797	CALR	28	-0.121407	0.00186596	0.0239068	p.fdr<0.05 & Downregulated
P27816	MAP4	67	0.00714335	1	1	N.S.
P27824	CANX	31	-0.0309369	0.999972	1	N.S.
P28065	PSMB9	1	0.470386	0.0014161	0.0191725	p.fdr<0.05 & Upregulated
P28066	PSMA5	13	-0.0535598	0.84508	1	N.S.
P28070	PSMB4	7	-0.00193516	0.999998	1	N.S.
P28072	PSMB6	5	-0.131706	0.0512037	0.270022	N.S.
P28074	PSMB5	12	-0.0052547	0.999998	1	N.S.
P28288	ABCD3	10	-0.0258587	0.979291	1	N.S.
P28331	NDUFS1	31	-0.105921	0.0297969	0.191094	N.S.
P28340	POLD1	10	-0.0618485	0.654965	1	N.S.
P28370	SMARCA1	12	-0.00745718	0.999991	1	N.S.
P28482	MAPK1	12	-0.00304303	1	1	N.S.
P28676	GCA	5	-0.0610895	0.552733	1	N.S.
P28715	ERCC5	2	-0.0147442	0.728059	1	N.S.
P28799	GRN	12	-0.0208276	0.997778	1	N.S.
P28838	LAP3	28	0.50941	6.36324e-36	2.27764e-33	p.fdr<0.05 & Upregulated
P28906	CD34	2	-0.0460443	0.729656	1	N.S.
P29034	S100A2	2	3.40181	5.99668e-11	2.7696e-09	p.fdr<0.05 & Upregulated
P29083	GTF2E1	2	-0.0176555	0.959979	1	N.S.
P29084	GTF2E2	5	-0.130581	0.0922775	0.392043	N.S.
P29144	TPP2	25	-0.0467073	0.959052	1	N.S.
P29218	IMPA1	10	0.00938605	0.999964	1	N.S.
P29317	EPHA2	16	0.320506	3.33933e-12	1.66299e-10	p.fdr<0.05 & Upregulated
P29353	SHC1	6	0.25555	0.000153947	0.00271279	p.fdr<0.05 & Upregulated
P29372	MPG	4	-0.137006	0.22658	0.664603	N.S.
P29401	TKT	40	0.332992	5.83894e-30	1.19427e-27	p.fdr<0.05 & Upregulated
P29558	RBMS1	4	0.194374	0.0134105	0.110666	N.S.
P29590	PML	12	0.855455	2.86671e-25	4.32043e-23	p.fdr<0.05 & Upregulated
P29692	EEF1D	18	0.0291652	0.994703	1	N.S.
P29966	MARCKS	9	-0.268576	3.55346e-05	0.000734681	p.fdr<0.05 & Downregulated
P29992	GNA11	4	0.13381	0.0912911	0.389586	N.S.
P30038	ALDH4A1	18	0.0735473	0.392523	0.878802	N.S.
P30040	ERP29	16	-0.0657298	0.521527	0.992617	N.S.
P30041	PRDX6	22	0.175923	6.65815e-06	0.00016507	p.fdr<0.05 & Upregulated
P30043	BLVRB	14	-0.0261861	0.996091	1	N.S.
P30044	PRDX5	15	-0.105092	0.25641	0.707691	N.S.
P30046	DDT	4	-0.0499852	0.703129	1	N.S.
P30048	PRDX3	9	-0.102984	0.108597	0.435793	N.S.
P30049	ATP5F1D	5	-0.0973837	0.409669	0.896364	N.S.
P30050	RPL12	14	-0.116384	0.0521749	0.274385	N.S.
P30084	ECHS1	16	-0.0603709	0.729573	1	N.S.
P30085	CMPK1	11	-0.0323053	0.978166	1	N.S.
P30086	PEBP1	13	0.000425212	1	1	N.S.
P30101	PDIA3	47	-0.0364659	0.99929	1	N.S.
P30153	PPP2R1A	21	0.00345897	1	1	N.S.
P30154	PPP2R1B	3	-0.0563749	0.588265	1	N.S.
P30260	CDC27	8	-0.0798621	0.491976	0.967232	N.S.
P30405	PPIF	7	-0.158106	0.0170659	0.132614	N.S.
P30414	NKTR	3	-0.0591444	0.715358	1	N.S.
P30419	NMT1	10	-0.0441981	0.907045	1	N.S.
P30460	HLA-B	1	1.26172	2.5136e-05	0.000539153	p.fdr<0.05 & Upregulated
P30466	HLA-B	1	0.400895	0.0107315	0.0934707	N.S.
P30483	HLA-B	2	-0.0302306	0.580368	1	N.S.
P30485	HLA-B	1	1.36361	1.64967e-06	4.60863e-05	p.fdr<0.05 & Upregulated
P30495	HLA-B	1	-0.0267968	0.814564	1	N.S.
P30511	HLA-F	1	0.721437	8.04033e-05	0.0015349	p.fdr<0.05 & Upregulated
P30519	HMOX2	15	0.0412371	0.954021	1	N.S.
P30520	ADSS	15	-0.250554	1.01725e-07	3.42692e-06	p.fdr<0.05 & Downregulated
P30533	LRPAP1	9	-0.102793	0.126758	0.479169	N.S.
P30566	ADSL	20	-0.0735088	0.73408	1	N.S.
P30622	CLIP1	8	0.112482	0.24404	0.688292	N.S.
P30626	SRI	13	0.0325361	0.979463	1	N.S.
P30825	SLC7A1	2	-0.181881	0.199621	0.623013	N.S.
P30837	ALDH1B1	12	0.0236126	0.994016	1	N.S.
P30876	POLR2B	17	0.0280276	0.998611	1	N.S.
P30990	NTS	11	-0.407664	3.31505e-13	1.89853e-11	p.fdr<0.05 & Downregulated
P31040	SDHA	20	-0.0730435	0.460569	0.941692	N.S.
P31146	CORO1A	9	-0.0443339	0.853525	1	N.S.
P31150	GDI1	21	-0.0362567	0.978231	1	N.S.
P31153	MAT2A	16	-0.0265302	0.996101	1	N.S.
P31323	PRKAR2B	1	0.119508	0.306458	0.779692	N.S.
P31350	RRM2	2	-0.675532	0.0015145	0.020171	p.fdr<0.05 & Downregulated
P31483	TIA1	4	0.0210892	0.949453	1	N.S.
P31645	SLC6A4	1	-0.10888	0.41624	0.90091	N.S.
P31689	DNAJA1	17	-0.0578562	0.685736	1	N.S.
P31749	AKT1	4	-0.0126331	0.980994	1	N.S.
P31751	AKT2	1	-0.128528	0.239221	0.680248	N.S.
P31930	UQCRC1	21	-0.0347398	0.991146	1	N.S.
P31937	HIBADH	12	0.165654	0.00386192	0.0428629	p.fdr<0.05 & Upregulated
P31939	ATIC	39	-0.0936699	0.153334	0.535461	N.S.
P31942	HNRNPH3	10	0.0721008	0.53515	1	N.S.
P31943	HNRNPH1	13	0.0258367	0.995686	1	N.S.
P31946	YWHAB	5	-0.0890129	0.470113	0.948787	N.S.
P31947	SFN	3	3.05572	1.21075e-15	8.25472e-14	p.fdr<0.05 & Upregulated
P31948	STIP1	41	-0.103398	0.123635	0.472263	N.S.
P32321	DCTD	6	0.026481	0.952057	1	N.S.
P32322	PYCR1	10	-0.0675157	0.515477	0.986493	N.S.
P32780	GTF2H1	3	-0.0346969	0.841311	1	N.S.
P32969	RPL9	14	-0.0881988	0.242658	0.685933	N.S.
P33121	ACSL1	14	-0.147333	0.00162917	0.021302	p.fdr<0.05 & Downregulated
P33176	KIF5B	40	-0.0248807	0.999999	1	N.S.
P33240	CSTF2	6	-0.0715367	0.664343	1	N.S.
P33316	DUT	8	-0.0445361	0.845189	1	N.S.
P33527	ABCC1	2	0.0532347	0.809896	1	N.S.
P33552	CKS2	1	0.0108861	0.911724	1	N.S.
P33897	ABCD1	1	0.0462818	0.685542	1	N.S.
P33981	TTK	2	-0.0844184	0.476749	0.954332	N.S.
P33991	MCM4	33	-0.10799	0.0539979	0.280368	N.S.
P33992	MCM5	30	-0.0606584	0.758049	1	N.S.
P33993	MCM7	31	-0.0789382	0.290958	0.760146	N.S.
P34059	GALNS	6	0.0658613	0.667259	1	N.S.
P34896	SHMT1	4	-0.074088	0.446735	0.926639	N.S.
P34897	SHMT2	23	-0.076882	0.315535	0.790148	N.S.
P34932	HSPA4	63	-0.104973	0.0289717	0.188333	N.S.
P34949	MPI	10	0.0224265	0.990973	1	N.S.
P35052	GPC1	1	0.480226	0.0318405	0.199508	N.S.
P35080	PFN2	7	-0.0782396	0.495188	0.970893	N.S.
P35219	CA8	2	-0.0566195	0.608184	1	N.S.
P35221	CTNNA1	32	0.237766	1.90899e-13	1.12709e-11	p.fdr<0.05 & Upregulated
P35222	CTNNB1	5	0.588818	3.3208e-07	1.02801e-05	p.fdr<0.05 & Upregulated
P35226	BMI1	1	-0.0477078	0.621281	1	N.S.
P35232	PHB	23	-0.0915433	0.169429	0.56858	N.S.
P35237	SERPINB6	15	-0.155857	0.103783	0.424546	N.S.
P35240	NF2	1	0.239411	0.0342326	0.207039	N.S.
P35241	RDX	23	0.0157754	0.999998	1	N.S.
P35244	RPA3	6	-0.0214536	0.974073	1	N.S.
P35249	RFC4	8	-0.127696	0.12771	0.480327	N.S.
P35250	RFC2	5	-0.11553	0.112069	0.44355	N.S.
P35251	RFC1	10	-0.0933865	0.512652	0.985231	N.S.
P35268	RPL22	3	0.00375737	0.99754	1	N.S.
P35269	GTF2F1	8	-0.0809918	0.330872	0.80868	N.S.
P35270	SPR	17	-0.0174933	0.999944	1	N.S.
P35452	HOXD12	1	0.083281	0.441499	0.924147	N.S.
P35556	FBN2	84	0.0320717	1	1	N.S.
P35568	IRS1	13	0.0120967	0.999948	1	N.S.
P35573	AGL	7	-0.142836	0.0277606	0.184437	N.S.
P35579	MYH9	137	0.26924	4.50811e-63	2.86866e-60	p.fdr<0.05 & Upregulated
P35580	MYH10	82	0.0282878	1	1	N.S.
P35606	COPB2	34	-0.0263836	0.999913	1	N.S.
P35610	SOAT1	2	-0.0134284	0.949396	1	N.S.
P35611	ADD1	12	0.036511	0.959276	1	N.S.
P35612	ADD2	2	0.137341	0.388557	0.876819	N.S.
P35613	BSG	7	0.16441	0.00526921	0.0546681	N.S.
P35625	TIMP3	1	0.139483	0.220517	0.656023	N.S.
P35637	FUS	10	-0.164911	0.0254529	0.174798	N.S.
P35658	NUP214	20	-0.0985767	0.337654	0.815169	N.S.
P35659	DEK	16	-0.0668216	0.769774	1	N.S.
P35670	ATP7B	2	0.0766598	0.437936	0.919772	N.S.
P35711	SOX5	6	-0.158414	0.114384	0.450536	N.S.
P35813	PPM1A	6	0.0333518	0.925815	1	N.S.
P35914	HMGCL	11	0.0731813	0.44629	0.926476	N.S.
P35998	PSMC2	33	-0.0611795	0.806738	1	N.S.
P36404	ARL2	5	-0.0132098	0.988757	1	N.S.
P36405	ARL3	9	-0.194271	0.00120164	0.016744	p.fdr<0.05 & Downregulated
P36507	MAP2K2	5	-0.0118356	0.991721	1	N.S.
P36542	ATP5F1C	14	-0.107434	0.223947	0.661446	N.S.
P36543	ATP6V1E1	9	-0.0632945	0.726027	1	N.S.
P36551	CPOX	21	-0.247521	4.93708e-10	2.09442e-08	p.fdr<0.05 & Downregulated
P36578	RPL4	33	-0.115081	0.0353732	0.211243	N.S.
P36639	NUDT1	3	-0.0756052	0.462458	0.942861	N.S.
P36776	LONP1	36	-0.0382071	0.99722	1	N.S.
P36871	PGM1	21	-0.0158213	0.999982	1	N.S.
P36873	PPP1CC	2	0.0506243	0.663301	1	N.S.
P36894	BMPR1A	1	0.137646	0.1812	0.592981	N.S.
P36915	GNL1	10	0.0353001	0.943106	1	N.S.
P36954	POLR2I	2	-0.0461501	0.663459	1	N.S.
P36955	SERPINF1	2	0.150486	0.174229	0.58056	N.S.
P36957	DLST	16	-0.00184012	1	1	N.S.
P36969	GPX4	11	-0.0197326	0.996001	1	N.S.
P37108	SRP14	11	-0.135895	0.0115194	0.0986122	N.S.
P37198	NUP62	10	-0.0692625	0.534629	1	N.S.
P37235	HPCAL1	4	0.0336758	0.864988	1	N.S.
P37802	TAGLN2	15	0.786596	5.44584e-28	1.03961e-25	p.fdr<0.05 & Upregulated
P37837	TALDO1	17	0.00920229	1	1	N.S.
P37840	SNCA	3	-0.798891	7.75442e-08	2.67527e-06	p.fdr<0.05 & Downregulated
P38117	ETFB	19	-0.0759759	0.329976	0.8079	N.S.
P38159	RBMX	7	-0.0979263	0.229958	0.669272	N.S.
P38432	COIL	6	-0.0199015	0.976896	1	N.S.
P38435	GGCX	3	0.0995574	0.241659	0.68547	N.S.
P38571	LIPA	3	0.203152	0.0123007	0.103732	N.S.
P38606	ATP6V1A	26	-0.0423248	0.961085	1	N.S.
P38646	HSPA9	51	-0.158467	6.12956e-07	1.83791e-05	p.fdr<0.05 & Downregulated
P38919	EIF4A3	23	-0.0452941	0.922772	1	N.S.
P39019	RPS19	13	-0.0993302	0.127735	0.480327	N.S.
P39023	RPL3	28	-0.157756	0.00102426	0.0146648	p.fdr<0.05 & Downregulated
P39060	COL18A1	6	0.497544	1.45138e-08	5.46845e-07	p.fdr<0.05 & Upregulated
P39210	MPV17	1	0.0196108	0.877314	1	N.S.
P39656	DDOST	14	0.00388477	1	1	N.S.
P39687	ANP32A	7	-0.0527241	0.822434	1	N.S.
P39748	FEN1	18	-0.167615	8.67411e-05	0.00165039	p.fdr<0.05 & Downregulated
P39880	CUX1	3	0.0438629	0.781253	1	N.S.
P40121	CAPG	1	2.76591	3.67771e-07	1.12033e-05	p.fdr<0.05 & Upregulated
P40123	CAP2	15	0.0915541	0.119509	0.463706	N.S.
P40222	TXLNA	15	-0.0488176	0.925434	1	N.S.
P40227	CCT6A	32	-0.0709565	0.48185	0.95685	N.S.
P40306	PSMB10	1	0.0841637	0.450288	0.929632	N.S.
P40337	VHL	1	0.0794489	0.44623	0.926476	N.S.
P40429	RPL13A	12	-0.125298	0.021591	0.155929	N.S.
P40616	ARL1	4	-0.106157	0.194209	0.616036	N.S.
P40617	ARL4A	1	-0.367171	0.0051892	0.0541322	N.S.
P40692	MLH1	7	-0.129742	0.0892217	0.384479	N.S.
P40763	STAT3	35	0.203603	4.54019e-10	1.94042e-08	p.fdr<0.05 & Upregulated
P40818	USP8	3	-0.0559858	0.682298	1	N.S.
P40855	PEX19	4	-0.100555	0.353817	0.834393	N.S.
P40925	MDH1	22	-0.178706	3.69338e-05	0.000760863	p.fdr<0.05 & Downregulated
P40926	MDH2	24	-0.250436	5.14613e-13	2.86135e-11	p.fdr<0.05 & Downregulated
P40937	RFC5	12	-0.0211014	0.997056	1	N.S.
P40938	RFC3	9	-0.086642	0.255788	0.706656	N.S.
P40939	HADHA	49	-0.0753271	0.608907	1	N.S.
P41091	EIF2S3	20	-0.0114636	1	1	N.S.
P41208	CETN2	3	-0.0797417	0.615127	1	N.S.
P41212	ETV6	1	0.189939	0.0955519	0.4008	N.S.
P41214	EIF2D	14	-0.00894527	0.999999	1	N.S.
P41223	BUD31	6	-0.135002	0.0748172	0.346385	N.S.
P41227	NAA10	11	-0.137963	0.0461234	0.251244	N.S.
P41236	PPP1R2	2	0.0103355	0.931445	1	N.S.
P41240	CSK	12	0.00834924	0.999986	1	N.S.
P41247	PNPLA4	2	0.0558215	0.630336	1	N.S.
P41250	GARS	30	-0.0086395	1	1	N.S.
P41252	IARS	42	-0.0975322	0.0247161	0.171437	N.S.
P41567	EIF1	1	-0.16863	0.210319	0.639328	N.S.
P41743	PRKCI	9	-0.0517357	0.843437	1	N.S.
P42025	ACTR1B	1	0.425434	0.00561564	0.0573275	N.S.
P42126	ECI1	5	-0.0268264	0.941414	1	N.S.
P42166	TMPO	12	-0.0205833	0.999429	1	N.S.
P42167	TMPO	11	-0.0372828	0.96888	1	N.S.
P42224	STAT1	39	0.886061	2.22303e-72	1.81876e-69	p.fdr<0.05 & Upregulated
P42285	MTREX	27	-0.103401	0.05088	0.268562	N.S.
P42345	MTOR	11	0.00962939	0.999928	1	N.S.
P42356	PI4KA	1	-0.209477	0.0812012	0.362725	N.S.
P42566	EPS15	11	0.21174	1.9334e-05	0.000425869	p.fdr<0.05 & Upregulated
P42574	CASP3	3	0.0755024	0.437464	0.919772	N.S.
P42677	RPS27	1	0.0363242	0.73986	1	N.S.
P42684	ABL2	1	0.150209	0.176457	0.585306	N.S.
P42694	HELZ	1	-0.0599251	0.5479	1	N.S.
P42695	NCAPD3	2	0.0346978	0.812114	1	N.S.
P42696	RBM34	7	-0.13249	0.13946	0.508394	N.S.
P42704	LRPPRC	95	-0.179901	9.01691e-21	9.93074e-19	p.fdr<0.05 & Downregulated
P42765	ACAA2	16	0.199481	1.80278e-06	4.9877e-05	p.fdr<0.05 & Upregulated
P42766	RPL35	7	-0.137734	0.0352984	0.211088	N.S.
P42771	CDKN2A	7	0.165635	0.0383657	0.2226	N.S.
P42785	PRCP	11	-0.0603821	0.674343	1	N.S.
P42858	HTT	5	0.0110096	0.994122	1	N.S.
P42892	ECE1	2	0.507327	0.000114721	0.00209238	p.fdr<0.05 & Upregulated
P43004	SLC1A2	1	0.134705	0.264445	0.722899	N.S.
P43034	PAFAH1B1	19	0.00931603	1	1	N.S.
P43155	CRAT	8	0.0184892	0.991676	1	N.S.
P43235	CTSK	2	0.0627543	0.597088	1	N.S.
P43243	MATR3	38	-0.0260919	0.999963	1	N.S.
P43246	MSH2	24	-0.0347362	0.998936	1	N.S.
P43250	GRK6	1	-0.133909	0.418451	0.903987	N.S.
P43304	GPD2	24	0.0544708	0.961885	1	N.S.
P43307	SSR1	4	0.00230637	0.999726	1	N.S.
P43354	NR4A2	3	-0.136287	0.0935445	0.395372	N.S.
P43358	MAGEA4	11	0.00513497	0.999998	1	N.S.
P43362	MAGEA9	2	0.0950021	0.432934	0.915136	N.S.
P43487	RANBP1	8	-0.0996079	0.315244	0.790148	N.S.
P43490	NAMPT	16	0.221179	1.17797e-07	3.94057e-06	p.fdr<0.05 & Upregulated
P43686	PSMC4	27	-0.0465192	0.924234	1	N.S.
P43897	TSFM	11	-0.0755115	0.465979	0.945329	N.S.
P45877	PPIC	4	-0.160824	0.0327945	0.20313	N.S.
P45880	VDAC2	14	-0.0386749	0.96242	1	N.S.
P45954	ACADSB	7	-0.145999	0.0254811	0.174798	N.S.
P45973	CBX5	9	-0.143245	0.0294195	0.189736	N.S.
P45974	USP5	27	0.0265088	0.999494	1	N.S.
P45983	MAPK8	1	-0.0219774	0.820969	1	N.S.
P45984	MAPK9	1	-0.125685	0.246626	0.692706	N.S.
P45985	MAP2K4	6	-0.0421384	0.799352	1	N.S.
P46013	MKI67	35	-0.254662	1.18348e-07	3.94057e-06	p.fdr<0.05 & Downregulated
P46019	PHKA2	3	0.0823847	0.357445	0.837254	N.S.
P46020	PHKA1	1	0.0915819	0.389254	0.876819	N.S.
P46060	RANGAP1	29	-0.0824134	0.283387	0.752857	N.S.
P46063	RECQL	21	-0.0525507	0.831999	1	N.S.
P46087	NOP2	19	-0.113546	0.0104526	0.0916722	N.S.
P46100	ATRX	8	-0.034942	0.948122	1	N.S.
P46108	CRK	13	0.0668674	0.483182	0.958497	N.S.
P46109	CRKL	14	-0.00292492	1	1	N.S.
P46199	MTIF2	12	-0.025452	0.990804	1	N.S.
P46379	BAG6	11	0.0839887	0.520894	0.991742	N.S.
P46459	NSF	38	0.00624508	1	1	N.S.
P46734	MAP2K3	5	0.0850579	0.504639	0.978357	N.S.
P46736	BRCC3	2	0.175203	0.36597	0.847516	N.S.
P46776	RPL27A	9	-0.140869	0.0618109	0.303855	N.S.
P46777	RPL5	22	-0.0677917	0.702889	1	N.S.
P46778	RPL21	11	-0.0219195	0.996529	1	N.S.
P46779	RPL28	8	-0.119067	0.0886786	0.383102	N.S.
P46781	RPS9	17	-0.0861094	0.20296	0.626646	N.S.
P46782	RPS5	11	-0.0607457	0.658853	1	N.S.
P46783	RPS10	11	-0.128179	0.0328795	0.20313	N.S.
P46821	MAP1B	67	0.60454	1.36963e-87	1.96097e-84	p.fdr<0.05 & Upregulated
P46926	GNPDA1	5	0.148372	0.0828991	0.366613	N.S.
P46937	YAP1	13	-0.0560019	0.739053	1	N.S.
P46939	UTRN	53	0.0234578	1	1	N.S.
P46940	IQGAP1	65	0.295781	9.8352e-35	3.31331e-32	p.fdr<0.05 & Upregulated
P46976	GYG1	7	-0.034704	0.901425	1	N.S.
P46977	STT3A	4	0.00456857	0.99889	1	N.S.
P47224	RABIF	4	-0.0104205	0.993749	1	N.S.
P47755	CAPZA2	7	0.00855879	0.999693	1	N.S.
P47756	CAPZB	15	0.0204065	0.998778	1	N.S.
P47813	EIF1AX	9	-0.122995	0.0500941	0.266711	N.S.
P47897	QARS	29	-0.0223959	0.999965	1	N.S.
P47914	RPL29	8	-0.13695	0.0280349	0.185829	N.S.
P47928	ID4	1	0.00942857	0.923563	1	N.S.
P47985	UQCRFS1	10	-0.113663	0.0777639	0.354323	N.S.
P48047	ATP5O	13	-0.133845	0.00945933	0.0849509	N.S.
P48059	LIMS1	16	0.138241	0.0368539	0.218039	N.S.
P48147	PREP	15	-0.047752	0.886583	1	N.S.
P48200	IREB2	6	0.00813564	0.998964	1	N.S.
P48201	ATP5MC3	1	-0.201544	0.0740281	0.344494	N.S.
P48426	PIP4K2A	2	0.292746	0.122557	0.470118	N.S.
P48444	ARCN1	22	-0.095617	0.199901	0.623209	N.S.
P48449	LSS	3	-0.0278377	0.911734	1	N.S.
P48506	GCLC	4	0.0665829	0.526297	0.996371	N.S.
P48507	GCLM	8	0.188174	0.00143856	0.0194308	p.fdr<0.05 & Upregulated
P48509	CD151	2	0.247236	0.00961627	0.0857825	N.S.
P48556	PSMD8	13	-0.0200723	0.997998	1	N.S.
P48634	PRRC2A	14	-0.100106	0.120258	0.465825	N.S.
P48637	GSS	18	0.0285127	0.997759	1	N.S.
P48643	CCT5	38	-0.10408	0.0245426	0.170784	N.S.
P48645	NMU	2	-0.067566	0.575332	1	N.S.
P48681	NES	31	0.378895	7.45879e-21	8.5433e-19	p.fdr<0.05 & Upregulated
P48723	HSPA13	10	-0.0626028	0.61211	1	N.S.
P48729	CSNK1A1	8	-0.0689569	0.50602	0.978715	N.S.
P48730	CSNK1D	2	0.120534	0.355151	0.836189	N.S.
P48735	IDH2	25	-0.126983	0.00147717	0.0197657	p.fdr<0.05 & Downregulated
P48739	PITPNB	17	-0.0273565	0.998343	1	N.S.
P48960	CD97	3	-0.0502709	0.706834	1	N.S.
P49005	POLD2	4	-0.0577853	0.644974	1	N.S.
P49006	MARCKSL1	2	-0.0274862	0.96317	1	N.S.
P49023	PXN	7	0.308316	6.65575e-06	0.00016507	p.fdr<0.05 & Upregulated
P49069	CAMLG	1	-0.0833857	0.48456	0.959902	N.S.
P49116	NR2C2	1	0.215791	0.0890387	0.383979	N.S.
P49137	MAPKAPK2	3	-0.0177126	0.943533	1	N.S.
P49189	ALDH9A1	21	-0.0288886	0.999881	1	N.S.
P49207	RPL34	7	-0.0717791	0.425065	0.909016	N.S.
P49247	RPIA	7	-0.0239546	0.979958	1	N.S.
P49257	LMAN1	16	-0.119363	0.0299738	0.19176	N.S.
P49281	SLC11A2	1	0.00787574	0.964259	1	N.S.
P49321	NASP	33	-0.177941	2.24913e-06	6.1337e-05	p.fdr<0.05 & Downregulated
P49327	FASN	86	-0.112325	1.36666e-05	0.000305737	p.fdr<0.05 & Downregulated
P49354	FNTA	1	-0.066186	0.508475	0.982468	N.S.
P49366	DHPS	2	-0.0505677	0.734414	1	N.S.
P49368	CCT3	39	-0.0668583	0.715724	1	N.S.
P49406	MRPL19	6	0.0093303	0.999154	1	N.S.
P49407	ARRB1	6	0.351926	1.16357e-06	3.33189e-05	p.fdr<0.05 & Upregulated
P49411	TUFM	32	-0.0975166	0.0591551	0.29554	N.S.
P49419	ALDH7A1	22	-0.0499835	0.8935	1	N.S.
P49427	CDC34	3	-0.198919	0.0151141	0.121742	N.S.
P49441	INPP1	8	-0.207438	0.000423687	0.00681589	p.fdr<0.05 & Downregulated
P49448	GLUD2	1	0.0242345	0.820727	1	N.S.
P49454	CENPF	1	0.135566	0.556275	1	N.S.
P49458	SRP9	2	-0.225939	0.0224757	0.160496	N.S.
P49459	UBE2A	6	-0.182546	0.00394236	0.0433357	p.fdr<0.05 & Downregulated
P49585	PCYT1A	10	-0.00609367	0.99996	1	N.S.
P49588	AARS	44	-0.0207667	1	1	N.S.
P49589	CARS	23	0.0267697	0.999468	1	N.S.
P49590	HARS2	7	-0.0606676	0.562658	1	N.S.
P49591	SARS	18	-0.037572	0.987934	1	N.S.
P49593	PPM1F	7	0.171729	0.00520625	0.0542113	N.S.
P49642	PRIM1	2	-0.305609	0.0143927	0.117417	N.S.
P49643	PRIM2	3	-0.162204	0.101982	0.41985	N.S.
P49674	CSNK1E	1	0.005428	0.966518	1	N.S.
P49711	CTCF	6	-0.165605	0.0437185	0.243528	N.S.
P49720	PSMB3	5	0.0409712	0.872771	1	N.S.
P49721	PSMB2	6	0.0236125	0.956501	1	N.S.
P49736	MCM2	29	-0.126748	0.00240571	0.0296938	p.fdr<0.05 & Downregulated
P49746	THBS3	3	-0.185299	0.177159	0.585453	N.S.
P49747	COMP	2	0.128586	0.24807	0.693863	N.S.
P49748	ACADVL	33	0.0214253	0.999997	1	N.S.
P49750	YLPM1	16	0.0102548	0.999998	1	N.S.
P49753	ACOT2	11	-0.0366657	0.92767	1	N.S.
P49754	VPS41	3	0.0619694	0.578649	1	N.S.
P49755	TMED10	11	-0.0644558	0.634599	1	N.S.
P49756	RBM25	15	-0.0533038	0.74484	1	N.S.
P49757	NUMB	2	-0.0125061	0.97371	1	N.S.
P49761	CLK3	1	-0.147319	0.239439	0.680531	N.S.
P49770	EIF2B2	9	-0.0109729	0.99983	1	N.S.
P49773	HINT1	6	0.118381	0.155401	0.53968	N.S.
P49790	NUP153	26	-0.0368579	0.99641	1	N.S.
P49792	RANBP2	80	-0.105627	0.0074541	0.0714753	N.S.
P49810	PSEN2	1	-0.165981	0.178452	0.588031	N.S.
P49815	TSC2	1	0.0323292	0.749892	1	N.S.
P49821	NDUFV1	16	-0.0918825	0.121626	0.468565	N.S.
P49840	GSK3A	5	-0.0590078	0.659502	1	N.S.
P49841	GSK3B	7	-0.0668634	0.488827	0.964351	N.S.
P49848	TAF6	3	0.0303832	0.84474	1	N.S.
P49902	NT5C2	6	0.376657	2.18383e-07	7.02628e-06	p.fdr<0.05 & Upregulated
P49903	SEPHS1	9	-0.00589693	0.999976	1	N.S.
P49914	MTHFS	3	0.0190328	0.943961	1	N.S.
P49915	GMPS	35	-0.102203	0.017268	0.133576	N.S.
P49916	LIG3	15	0.0170987	0.999967	1	N.S.
P49917	LIG4	3	0.023611	0.909804	1	N.S.
P49959	MRE11	17	-0.0644838	0.64175	1	N.S.
P49961	ENTPD1	1	-0.044445	0.738673	1	N.S.
P50148	GNAQ	2	0.0723604	0.746567	1	N.S.
P50151	GNG10	2	-0.0612625	0.542558	1	N.S.
P50213	IDH3A	15	-0.185504	7.36115e-06	0.000177879	p.fdr<0.05 & Downregulated
P50219	MNX1	1	-0.48804	0.0836316	0.368253	N.S.
P50238	CRIP1	4	-0.100009	0.336164	0.81437	N.S.
P50281	MMP14	8	0.110264	0.128025	0.481104	N.S.
P50336	PPOX	1	0.206537	0.0903075	0.386541	N.S.
P50395	GDI2	27	-0.0523667	0.88125	1	N.S.
P50402	EMD	14	0.0778466	0.456538	0.937272	N.S.
P50416	CPT1A	16	0.0135072	0.999986	1	N.S.
P50440	GATM	20	0.0213333	0.999993	1	N.S.
P50454	SERPINH1	23	-0.0137719	0.999999	1	N.S.
P50502	ST13	17	-0.112157	0.056482	0.287667	N.S.
P50542	PEX5	4	-0.0147031	0.976644	1	N.S.
P50548	ERF	3	0.0423662	0.733087	1	N.S.
P50552	VASP	13	0.0684222	0.580284	1	N.S.
P50570	DNM2	30	0.08746	0.19686	0.620142	N.S.
P50579	METAP2	12	-0.0184698	0.998625	1	N.S.
P50583	NUDT2	6	-0.0140627	0.997075	1	N.S.
P50613	CDK7	1	0.238719	0.199893	0.623209	N.S.
P50750	CDK9	4	0.040406	0.794205	1	N.S.
P50851	LRBA	17	-0.0887298	0.125447	0.477048	N.S.
P50895	BCAM	2	0.401627	0.000358649	0.00588533	p.fdr<0.05 & Upregulated
P50897	PPT1	9	-0.015809	0.997212	1	N.S.
P50914	RPL14	11	-0.0636008	0.615647	1	N.S.
P50990	CCT8	38	-0.114815	0.0109519	0.0948886	N.S.
P50991	CCT4	34	-0.0843142	0.242628	0.685933	N.S.
P50995	ANXA11	18	0.139867	0.00402918	0.0439818	p.fdr<0.05 & Upregulated
P51003	PAPOLA	6	-0.159409	0.0167175	0.130437	N.S.
P51114	FXR1	21	-0.0590736	0.81484	1	N.S.
P51116	FXR2	11	0.01247	0.999768	1	N.S.
P51148	RAB5C	4	0.0519646	0.682804	1	N.S.
P51149	RAB7A	18	-0.0830217	0.298731	0.769425	N.S.
P51151	RAB9A	5	-0.137012	0.0460807	0.251244	N.S.
P51153	RAB13	6	0.0109725	0.998539	1	N.S.
P51157	RAB28	1	-0.303807	0.0235382	0.166219	N.S.
P51159	RAB27A	1	-0.266364	0.0465595	0.252264	N.S.
P51398	DAP3	7	-0.171492	0.00370928	0.0414094	p.fdr<0.05 & Downregulated
P51452	DUSP3	8	0.0146329	0.998483	1	N.S.
P51512	MMP16	1	-0.0969314	0.332915	0.810976	N.S.
P51532	SMARCA4	8	3.03572	7.63155e-16	5.39579e-14	p.fdr<0.05 & Upregulated
P51553	IDH3G	6	-0.0680504	0.568137	1	N.S.
P51570	GALK1	11	-0.0735693	0.388062	0.876354	N.S.
P51571	SSR4	5	-0.0995326	0.260498	0.715153	N.S.
P51572	BCAP31	13	-0.0774499	0.379883	0.864701	N.S.
P51580	TPMT	5	-0.00375455	0.999739	1	N.S.
P51606	RENBP	1	-0.135383	0.219158	0.654049	N.S.
P51608	MECP2	8	0.032009	0.981756	1	N.S.
P51610	HCFC1	27	-0.0945005	0.161288	0.553442	N.S.
P51617	IRAK1	5	0.15005	0.325162	0.802674	N.S.
P51648	ALDH3A2	5	0.0165745	0.981808	1	N.S.
P51649	ALDH5A1	7	0.00803331	0.999845	1	N.S.
P51659	HSD17B4	31	-0.150876	2.86707e-05	0.00060077	p.fdr<0.05 & Downregulated
P51665	PSMD7	13	-0.0983051	0.28903	0.758569	N.S.
P51668	UBE2D1	2	-0.0227077	0.935349	1	N.S.
P51674	GPM6A	1	-0.199674	0.0740478	0.344494	N.S.
P51687	SUOX	1	-0.0167553	0.86162	1	N.S.
P51688	SGSH	5	0.16349	0.0700653	0.331898	N.S.
P51692	STAT5B	5	-0.00909927	0.997522	1	N.S.
P51784	USP11	10	0.0418464	0.90377	1	N.S.
P51790	CLCN3	1	-0.144066	0.161449	0.553619	N.S.
P51798	CLCN7	2	0.00205114	0.998198	1	N.S.
P51809	VAMP7	4	-0.101535	0.366448	0.847597	N.S.
P51812	RPS6KA3	7	0.076543	0.468068	0.947887	N.S.
P51858	HDGF	11	-0.0211531	0.999599	1	N.S.
P51884	LUM	3	0.117984	0.167683	0.56556	N.S.
P51911	CNN1	2	0.261651	0.00825973	0.0769162	N.S.
P51946	CCNH	1	-0.0718382	0.463258	0.943484	N.S.
P51948	MNAT1	4	-0.0445959	0.811202	1	N.S.
P51956	NEK3	2	0.00986788	0.995447	1	N.S.
P51957	NEK4	1	-0.0467672	0.671349	1	N.S.
P51970	NDUFA8	6	-0.097552	0.177116	0.585453	N.S.
P51991	HNRNPA3	15	0.027788	0.994532	1	N.S.
P52209	PGD	26	0.0546947	0.938577	1	N.S.
P52272	HNRNPM	39	-0.0218322	0.999999	1	N.S.
P52292	KPNA2	22	-0.101927	0.511062	0.983815	N.S.
P52294	KPNA1	10	-0.0933081	0.225801	0.66384	N.S.
P52298	NCBP2	1	0.077691	0.614212	1	N.S.
P52306	RAP1GDS1	11	-0.0781309	0.545291	1	N.S.
P52434	POLR2H	1	-0.115634	0.305192	0.778199	N.S.
P52565	ARHGDIA	11	0.00271652	1	1	N.S.
P52594	AGFG1	3	-0.0373054	0.794538	1	N.S.
P52597	HNRNPF	13	0.075472	0.631866	1	N.S.
P52630	STAT2	2	0.404537	0.00118306	0.0165657	p.fdr<0.05 & Upregulated
P52655	GTF2A1	2	-0.167037	0.137871	0.50397	N.S.
P52657	GTF2A2	2	-0.0722225	0.545775	1	N.S.
P52701	MSH6	30	-0.0737325	0.689319	1	N.S.
P52732	KIF11	9	-0.0579142	0.654453	1	N.S.
P52735	VAV2	3	0.118245	0.140498	0.509831	N.S.
P52756	RBM5	4	-0.144517	0.146402	0.520688	N.S.
P52758	RIDA	4	-0.096667	0.252315	0.700735	N.S.
P52788	SMS	10	0.333201	1.52071e-09	6.22078e-08	p.fdr<0.05 & Upregulated
P52789	HK2	5	0.137492	0.0836559	0.368253	N.S.
P52815	MRPL12	7	-0.260843	0.000543299	0.00852458	p.fdr<0.05 & Downregulated
P52848	NDST1	1	0.0934716	0.339681	0.818407	N.S.
P52888	THOP1	12	-0.0822703	0.444446	0.926476	N.S.
P52907	CAPZA1	10	0.0666118	0.709109	1	N.S.
P52926	HMGA2	2	0.0948332	0.370177	0.852092	N.S.
P52943	CRIP2	4	-0.047388	0.766734	1	N.S.
P52948	NUP98	20	-0.0793428	0.266777	0.726242	N.S.
P53004	BLVRA	14	0.036709	0.97664	1	N.S.
P53007	SLC25A1	9	0.0109062	0.999603	1	N.S.
P53041	PPP5C	15	-0.060142	0.688618	1	N.S.
P53350	PLK1	1	-0.150405	0.253447	0.703242	N.S.
P53365	ARFIP2	7	-0.110269	0.133207	0.494092	N.S.
P53367	ARFIP1	10	-0.0454822	0.962104	1	N.S.
P53384	NUBP1	6	-0.111158	0.149397	0.52652	N.S.
P53396	ACLY	52	0.035851	0.999959	1	N.S.
P53582	METAP1	11	-0.112443	0.130594	0.487876	N.S.
P53597	SUCLG1	8	-0.0789549	0.418827	0.9043	N.S.
P53602	MVD	5	-0.136531	0.0646083	0.314257	N.S.
P53611	RABGGTB	2	0.022936	0.883172	1	N.S.
P53618	COPB1	33	-0.0345561	0.998464	1	N.S.
P53621	COPA	51	-0.0208669	1	1	N.S.
P53634	CTSC	5	-0.0424089	0.813341	1	N.S.
P53677	AP3M2	1	0.0429812	0.678976	1	N.S.
P53680	AP2S1	4	0.101732	0.24228	0.685933	N.S.
P53701	HCCS	14	-0.355297	1.80376e-10	8.00492e-09	p.fdr<0.05 & Downregulated
P53801	PTTG1IP	1	-0.00662564	0.948806	1	N.S.
P53814	SMTN	1	0.148323	0.376392	0.858671	N.S.
P53985	SLC16A1	2	0.173859	0.076033	0.349191	N.S.
P53990	IST1	7	-0.0937009	0.391521	0.878802	N.S.
P53992	SEC24C	18	0.140323	0.00743753	0.0714753	N.S.
P53999	SUB1	10	-0.0283839	0.980202	1	N.S.
P54098	POLG	4	-0.0570381	0.838075	1	N.S.
P54105	CLNS1A	6	-0.0564281	0.704113	1	N.S.
P54136	RARS	39	-0.064904	0.52055	0.991416	N.S.
P54252	ATXN3	2	0.643606	0.00859559	0.0790159	N.S.
P54278	PMS2	2	-0.0859371	0.43304	0.915136	N.S.
P54289	CACNA2D1	7	-0.0280719	0.950738	1	N.S.
P54296	MYOM2	1	-0.0491645	0.630841	1	N.S.
P54577	YARS	34	-0.0579069	0.955675	1	N.S.
P54578	USP14	27	-0.049133	0.978745	1	N.S.
P54619	PRKAG1	4	-0.0520603	0.790335	1	N.S.
P54652	HSPA2	11	0.379208	3.25582e-10	1.40196e-08	p.fdr<0.05 & Upregulated
P54709	ATP1B3	10	-0.115936	0.0565444	0.287667	N.S.
P54725	RAD23A	5	0.0492768	0.701054	1	N.S.
P54727	RAD23B	9	-0.0460483	0.901939	1	N.S.
P54756	EPHA5	7	-0.142905	0.0940306	0.396257	N.S.
P54760	EPHB4	1	-0.0194759	0.847522	1	N.S.
P54802	NAGLU	4	0.0597881	0.616479	1	N.S.
P54819	AK2	16	0.0217216	0.998988	1	N.S.
P54886	ALDH18A1	31	-0.0828214	0.183083	0.596208	N.S.
P54920	NAPA	18	0.186315	1.46247e-05	0.000325897	p.fdr<0.05 & Upregulated
P55010	EIF5	15	-0.0861549	0.184436	0.597792	N.S.
P55011	SLC12A2	11	0.634983	3.57678e-16	2.62619e-14	p.fdr<0.05 & Upregulated
P55036	PSMD4	13	-0.0889466	0.893269	1	N.S.
P55039	DRG2	4	-0.185783	0.0152711	0.12249	N.S.
P55060	CSE1L	21	-0.103091	0.264748	0.723027	N.S.
P55061	TMBIM6	1	-0.00315235	0.975521	1	N.S.
P55072	VCP	67	0.0285533	1	1	N.S.
P55081	MFAP1	4	-0.00638521	0.996106	1	N.S.
P55083	MFAP4	2	-0.106266	0.350099	0.831065	N.S.
P55084	HADHB	28	-0.0125631	1	1	N.S.
P55145	MANF	12	-0.150695	0.00342417	0.0389092	p.fdr<0.05 & Downregulated
P55196	AFDN	21	0.0735602	0.327498	0.805401	N.S.
P55199	ELL	2	-0.205695	0.0680992	0.32609	N.S.
P55209	NAP1L1	8	-0.11298	0.168997	0.568317	N.S.
P55210	CASP7	9	0.169501	0.00104592	0.0149021	p.fdr<0.05 & Upregulated
P55211	CASP9	1	-0.0717646	0.526189	0.996371	N.S.
P55212	CASP6	3	-0.0702121	0.476196	0.954295	N.S.
P55263	ADK	13	0.0424944	0.891644	1	N.S.
P55265	ADAR	36	0.175733	2.20232e-09	8.88216e-08	p.fdr<0.05 & Upregulated
P55268	LAMB2	28	-0.00338185	1	1	N.S.
P55327	TPD52	12	-0.181605	0.0179621	0.136862	N.S.
P55735	SEC13	11	0.00964945	0.999984	1	N.S.
P55769	SNU13	7	-0.0425068	0.813364	1	N.S.
P55786	NPEPPS	43	0.0415188	0.997016	1	N.S.
P55789	GFER	2	-0.0610175	0.643778	1	N.S.
P55795	HNRNPH2	6	0.0980992	0.417056	0.901993	N.S.
P55809	OXCT1	3	0.00647954	0.993486	1	N.S.
P55854	SUMO3	1	0.130645	0.277273	0.743108	N.S.
P55884	EIF3B	24	-0.0324772	0.997185	1	N.S.
P56134	ATP5J2	3	-0.102194	0.382646	0.868231	N.S.
P56181	NDUFV3	1	-0.0628367	0.56791	1	N.S.
P56182	RRP1	6	-0.0375542	0.887612	1	N.S.
P56192	MARS	26	-0.032621	0.998052	1	N.S.
P56211	ARPP19	2	-0.417994	0.108463	0.435793	N.S.
P56270	MAZ	1	0.105632	0.30398	0.777067	N.S.
P56377	AP1S2	1	-0.0316313	0.748766	1	N.S.
P56378	MP68	2	-0.213184	0.0203141	0.149153	N.S.
P56381	ATP5F1E	3	-0.139275	0.157938	0.545215	N.S.
P56385	ATP5ME	4	-0.0858302	0.316337	0.791809	N.S.
P56537	EIF6	8	0.061096	0.609463	1	N.S.
P56545	CTBP2	7	0.0226748	0.980435	1	N.S.
P56556	NDUFA6	7	-0.122673	0.0611281	0.302315	N.S.
P56730	PRSS12	7	0.0661015	0.845613	1	N.S.
P56747	CLDN6	1	-0.102361	0.634825	1	N.S.
P56945	BCAR1	1	0.256635	0.0349822	0.210084	N.S.
P56962	STX17	1	0.188026	0.0771037	0.351851	N.S.
P57076	CFAP298	4	-0.115668	0.200695	0.62362	N.S.
P57078	RIPK4	1	0.231143	0.0566296	0.287667	N.S.
P57081	WDR4	1	-0.809589	0.0545438	0.281659	N.S.
P57088	TMEM33	2	0.0417852	0.692197	1	N.S.
P57105	SYNJ2BP	4	-0.00884514	0.993363	1	N.S.
P57678	GEMIN4	4	-0.0843568	0.334272	0.812209	N.S.
P57721	PCBP3	1	-0.0430833	0.682723	1	N.S.
P57723	PCBP4	2	0.11271	0.308906	0.783001	N.S.
P57737	CORO7	11	0.0249627	0.992652	1	N.S.
P57740	NUP107	10	-0.0214385	0.99341	1	N.S.
P57772	EEFSEC	3	0.0633683	0.52957	0.998182	N.S.
P58004	SESN2	1	0.0460131	0.650206	1	N.S.
P58107	EPPK1	1	0.0265681	0.843283	1	N.S.
P58335	ANTXR2	4	-0.0484168	0.783383	1	N.S.
P58546	MTPN	6	-0.0396119	0.872116	1	N.S.
P58557	YBEY	1	-0.090257	0.44214	0.925151	N.S.
P59998	ARPC4	6	0.0104702	0.997734	1	N.S.
P60002	ELOF1	1	-0.177196	0.0921805	0.391921	N.S.
P60033	CD81	3	0.0460313	0.706479	1	N.S.
P60174	TPI1	19	-0.10378	0.0545886	0.281659	N.S.
P60228	EIF3E	15	-0.0253637	0.99715	1	N.S.
P60468	SEC61B	1	0.0427094	0.659477	1	N.S.
P60510	PPP4C	2	0.138605	0.178379	0.588031	N.S.
P60520	GABARAPL2	2	-0.227556	0.0289558	0.188333	N.S.
P60602	ROMO1	2	-0.151712	0.0900417	0.386225	N.S.
P60604	UBE2G2	5	-0.0525016	0.659328	1	N.S.
P60660	MYL6	11	0.206225	1.687e-05	0.000373029	p.fdr<0.05 & Upregulated
P60709	ACTB	13	0.102595	0.121949	0.469105	N.S.
P60763	RAC3	1	0.0568891	0.602553	1	N.S.
P60842	EIF4A1	23	-0.0678712	0.604329	1	N.S.
P60866	RPS20	8	-0.0570955	0.653614	1	N.S.
P60891	PRPS1	6	-0.0635317	0.678222	1	N.S.
P60900	PSMA6	15	-0.0151212	0.999932	1	N.S.
P60953	CDC42	7	0.00490821	0.999914	1	N.S.
P60981	DSTN	17	-0.193007	9.40242e-05	0.00175399	p.fdr<0.05 & Downregulated
P60983	GMFB	6	0.00815129	0.998872	1	N.S.
P61006	RAB8A	2	-0.06844	0.553129	1	N.S.
P61009	SPCS3	1	-0.0435297	0.674921	1	N.S.
P61011	SRP54	24	-0.0409699	0.968088	1	N.S.
P61018	RAB4B	1	0.117469	0.27791	0.743886	N.S.
P61019	RAB2A	2	-0.108423	0.307093	0.780961	N.S.
P61020	RAB5B	2	0.059288	0.59624	1	N.S.
P61024	CKS1B	1	-0.0379816	0.709029	1	N.S.
P61026	RAB10	6	-0.0209664	0.982423	1	N.S.
P61077	UBE2D3	4	-0.0964587	0.223848	0.661446	N.S.
P61081	UBE2M	9	-0.125669	0.0683303	0.326319	N.S.
P61086	UBE2K	12	-0.0589119	0.81114	1	N.S.
P61088	UBE2N	9	-0.0214979	0.992685	1	N.S.
P61106	RAB14	12	-0.0566839	0.762709	1	N.S.
P61158	ACTR3	22	-0.0378279	0.989468	1	N.S.
P61160	ACTR2	18	-0.044491	0.958533	1	N.S.
P61163	ACTR1A	7	-0.0330628	0.925532	1	N.S.
P61165	TMEM258	1	0.0316097	0.767662	1	N.S.
P61201	COPS2	18	-0.0320957	0.994584	1	N.S.
P61218	POLR2F	3	-0.151079	0.0782314	0.355863	N.S.
P61221	ABCE1	22	-0.172948	0.000174435	0.00299099	p.fdr<0.05 & Downregulated
P61224	RAP1B	5	-0.183857	0.00536478	0.0553588	N.S.
P61225	RAP2B	6	-0.103475	0.182973	0.596208	N.S.
P61244	MAX	1	-0.668336	0.0197719	0.146669	N.S.
P61247	RPS3A	30	-0.122309	0.0237971	0.167222	N.S.
P61254	RPL26	2	-0.24016	0.0418008	0.236554	N.S.
P61289	PSME3	11	-0.0347892	0.950913	1	N.S.
P61313	RPL15	8	-0.0559868	0.736749	1	N.S.
P61353	RPL27	10	-0.110467	0.207747	0.63488	N.S.
P61371	ISL1	2	-0.0181969	0.958304	1	N.S.
P61421	ATP6V0D1	8	-0.112281	0.105046	0.427273	N.S.
P61457	PCBD1	4	0.0624865	0.598274	1	N.S.
P61513	RPL37A	4	-0.0943132	0.285561	0.755734	N.S.
P61586	RHOA	3	-0.0933813	0.299243	0.769425	N.S.
P61587	RND3	4	0.0375548	0.836287	1	N.S.
P61604	HSPE1	17	-0.179828	4.73719e-06	0.000122207	p.fdr<0.05 & Downregulated
P61619	SEC61A1	5	-0.165179	0.0539506	0.280368	N.S.
P61758	VBP1	9	-0.174387	0.00174429	0.0224861	p.fdr<0.05 & Downregulated
P61764	STXBP1	10	0.00642441	0.999982	1	N.S.
P61916	NPC2	11	0.0142887	0.999686	1	N.S.
P61923	COPZ1	6	-0.0328848	0.930692	1	N.S.
P61927	RPL37	4	-0.116211	0.366367	0.847597	N.S.
P61956	SUMO2	1	0.00751993	0.946498	1	N.S.
P61960	UFM1	1	-0.163732	0.124953	0.47612	N.S.
P61962	DCAF7	4	-0.0475926	0.73356	1	N.S.
P61964	WDR5	8	-0.0760933	0.489539	0.965091	N.S.
P61966	AP1S1	3	-0.00974821	0.981991	1	N.S.
P61970	NUTF2	5	-0.0342122	0.864	1	N.S.
P61978	HNRNPK	33	-0.00738697	1	1	N.S.
P61981	YWHAG	9	-0.000592177	1	1	N.S.
P62070	RRAS2	6	0.118604	0.0915214	0.390132	N.S.
P62072	TIMM10	3	-0.242237	0.0358354	0.213336	N.S.
P62081	RPS7	13	-0.11777	0.0377178	0.220478	N.S.
P62136	PPP1CA	4	0.0438122	0.766662	1	N.S.
P62140	PPP1CB	3	0.055115	0.625425	1	N.S.
P62166	NCS1	4	-0.145487	0.102213	0.420225	N.S.
P62191	PSMC1	29	0.00982767	1	1	N.S.
P62195	PSMC5	26	-0.0260226	0.999643	1	N.S.
P62241	RPS8	19	-0.00519201	1	1	N.S.
P62244	RPS15A	13	-0.0932065	0.229781	0.669272	N.S.
P62249	RPS16	14	-0.0648607	0.585554	1	N.S.
P62253	UBE2G1	3	-0.101731	0.220142	0.656023	N.S.
P62256	UBE2H	2	0.386832	0.000571625	0.00882397	p.fdr<0.05 & Upregulated
P62258	YWHAE	18	-0.0486318	0.897591	1	N.S.
P62263	RPS14	7	-0.0838873	0.3198	0.794574	N.S.
P62266	RPS23	10	-0.0816483	0.310203	0.783995	N.S.
P62269	RPS18	12	-0.0777253	0.375388	0.858437	N.S.
P62273	RPS29	2	-0.156756	0.188787	0.605028	N.S.
P62277	RPS13	18	-0.0512064	0.808322	1	N.S.
P62280	RPS11	20	-0.088803	0.325427	0.802981	N.S.
P62304	SNRPE	3	0.08448	0.341542	0.822199	N.S.
P62306	SNRPF	1	-0.0279607	0.778551	1	N.S.
P62308	SNRPG	3	0.128679	0.20352	0.627996	N.S.
P62310	LSM3	4	0.03765	0.954894	1	N.S.
P62312	LSM6	6	-0.00638255	0.999718	1	N.S.
P62314	SNRPD1	4	-0.0529509	0.726019	1	N.S.
P62316	SNRPD2	11	-0.0454738	0.857843	1	N.S.
P62318	SNRPD3	7	-0.0049558	0.999906	1	N.S.
P62328	TMSB4X	5	-0.148328	0.393284	0.87982	N.S.
P62330	ARF6	5	0.103755	0.164973	0.560711	N.S.
P62333	PSMC6	25	-0.0240248	0.999957	1	N.S.
P62380	TBPL1	1	-0.0752398	0.596113	1	N.S.
P62424	RPL7A	24	-0.132168	0.00334999	0.0383707	p.fdr<0.05 & Downregulated
P62487	POLR2G	3	-0.079568	0.429514	0.911616	N.S.
P62495	ETF1	20	-0.176672	6.0244e-05	0.00118134	p.fdr<0.05 & Downregulated
P62633	CNBP	3	-0.178872	0.11909	0.463139	N.S.
P62699	YPEL5	2	0.184399	0.0907933	0.387753	N.S.
P62701	RPS4X	25	-0.119829	0.00666318	0.0660049	N.S.
P62714	PPP2CB	1	0.0857583	0.406749	0.894566	N.S.
P62736	ACTA2	7	0.275892	2.58999e-05	0.000551407	p.fdr<0.05 & Upregulated
P62745	RHOB	3	-0.0677904	0.531163	0.999345	N.S.
P62750	RPL23A	11	-0.0262549	0.989723	1	N.S.
P62753	RPS6	17	-0.150924	0.00667309	0.0660049	N.S.
P62805	HIST1H4A	14	-0.0908159	0.213884	0.645371	N.S.
P62820	RAB1A	5	-0.120242	0.348543	0.829619	N.S.
P62826	RAN	11	-0.0981035	0.122019	0.469105	N.S.
P62829	RPL23	9	-0.0676433	0.55113	1	N.S.
P62834	RAP1A	4	-0.0977	0.438598	0.920429	N.S.
P62841	RPS15	6	-0.192124	0.00997769	0.0881682	N.S.
P62847	RPS24	4	-0.133417	0.0879372	0.381308	N.S.
P62851	RPS25	5	-0.0792999	0.342523	0.822832	N.S.
P62854	RPS26	5	-0.0678947	0.539989	1	N.S.
[truncated: 3,727 more rows]

## Sheet: C-BIN67_ATAC_DiffPeaks
chr	start	stop	strand	PeakID	baseMean	log2FoldChange	lfcSE	stat	pvalue	padj	Behavior
chr1	10069	10604	.	open_1	44.3164	0.109099	0.272581	0.400245	0.688976	0.857437	NS
chr1	180843	181722	.	open_2	251.764	0.115536	0.152621	0.757013	0.449042	0.715842	NS
chr1	191333	191566	.	open_3	11.5961	-0.287216	0.428478	-0.670317	0.502656	0.748908	NS
chr1	778415	779458	.	open_4	108	0.00983515	0.153895	0.0639082	0.949043	0.98011	NS
chr1	779670	779923	.	open_5	17.309	0.084268	0.344184	0.244834	0.806585	0.91692	NS
chr1	827290	827746	.	open_6	36.8905	0.278563	0.239691	1.16218	0.245164	0.563269	NS
chr1	869718	870151	.	open_7	18.1878	-0.672824	0.343863	-1.95666	0.0503875	0.296884	NS
chr1	877537	877734	.	open_8	5.6913	1.01631	0.594916	1.70832	0.0875775	0.375527	NS
chr1	897946	898131	.	open_9	6.04033	0.381009	0.569893	0.668561	0.503776	0.749536	NS
chr1	904655	904844	.	open_10	16.1228	0.372332	0.354293	1.05092	0.293297	0.604873	NS
chr1	938233	938555	.	open_11	20.5528	-0.094712	0.31433	-0.301314	0.763175	0.895449	NS
chr1	959046	959430	.	open_12	42.2065	0.0391685	0.231612	0.169113	0.865708	0.944172	NS
chr1	976008	976583	.	open_13	34.3728	-0.12406	0.240377	-0.516107	0.60578	0.810426	NS
chr1	999524	1000947	.	open_14	292.235	0.20097	0.150609	1.33438	0.182079	0.499579	NS
chr1	1013203	1014326	.	open_15	94.4331	0.25131	0.172271	1.45881	0.144618	0.455027	NS
chr1	1019349	1019919	.	open_16	89.4735	0.323374	0.170858	1.89265	0.058404	0.31871	NS
chr1	1031758	1031940	.	open_17	6.75815	0.5895	0.557694	1.05703	0.290498	0.602822	NS
chr1	1059325	1060053	.	open_18	54.3331	-0.0738023	0.211696	-0.348623	0.727372	0.877738	NS
chr1	1079518	1080276	.	open_19	27.6689	0.394793	0.273603	1.44294	0.149037	0.460251	NS
chr1	1115937	1116505	.	open_20	169.039	0.0737327	0.143253	0.514702	0.606761	0.811045	NS
chr1	1122199	1122436	.	open_21	17.1621	-0.453469	0.363996	-1.24581	0.212835	0.531051	NS
chr1	1231736	1232339	.	open_22	155.054	0.0901079	0.145454	0.619493	0.535592	0.769588	NS
chr1	1273776	1274358	.	open_23	78.66	0.0927716	0.202743	0.457582	0.647253	0.834836	NS
chr1	1308012	1308742	.	open_24	161.937	0.212709	0.152518	1.39465	0.163123	0.475881	NS
chr1	1324460	1325220	.	open_25	81.9779	0.139608	0.172727	0.808257	0.418943	0.69537	NS
chr1	1347886	1348328	.	open_26	30.8792	0.351764	0.270966	1.29818	0.194225	0.512542	NS
chr1	1374994	1375728	.	open_27	179.518	0.107489	0.135754	0.79179	0.428483	0.702425	NS
chr1	1399277	1399901	.	open_28	140.047	-0.0483413	0.143653	-0.336514	0.736483	0.882324	NS
chr1	1406878	1407562	.	open_29	71.3135	0.330907	0.179581	1.84266	0.0653791	0.333993	NS
chr1	1441084	1441299	.	open_30	9.96067	-0.556038	0.463995	-1.19837	0.230773	0.549151	NS
chr1	1471118	1471850	.	open_31	78.7349	0.0269153	0.170438	0.157919	0.874521	0.948206	NS
chr1	1504830	1505293	.	open_32	14.0075	-0.13808	0.371534	-0.371647	0.710155	0.869077	NS
chr1	1511391	1512228	.	open_33	121.331	0.0388312	0.158444	0.245079	0.806396	0.916811	NS
chr1	1551128	1551382	.	open_34	9.20361	-0.643501	0.465248	-1.38314	0.166623	0.48078	NS
chr1	1574191	1575231	.	open_35	147.753	0.103543	0.156966	0.659654	0.509476	0.752833	NS
chr1	1615130	1615885	.	open_36	127.859	-0.0966663	0.150213	-0.64353	0.51988	0.759341	NS
chr1	1658772	1659352	.	open_37	95.5912	0.0294609	0.188181	0.156556	0.875595	0.948756	NS
chr1	1665534	1665710	.	open_38	5.78372	1.09354	0.59779	1.8293	0.0673552	0.338477	NS
chr1	1692503	1692869	.	open_39	22.0411	-0.135044	0.333056	-0.40547	0.685132	0.855234	NS
chr1	1693076	1693386	.	open_40	21.577	0.0613643	0.29917	0.205115	0.837482	0.931536	NS
chr1	1724121	1724684	.	open_41	126.014	0.0212938	0.154252	0.138046	0.890204	0.95478	NS
chr1	1746202	1746651	.	open_42	23.6533	-0.328399	0.298499	-1.10017	0.271259	0.586231	NS
chr1	1748578	1749200	.	open_43	17.0081	-0.141951	0.364772	-0.389151	0.697164	0.862259	NS
chr1	1778015	1779197	.	open_44	110.399	0.0554065	0.16412	0.337597	0.735667	0.881846	NS
chr1	1827296	1827509	.	open_45	5.1554	0.620204	0.628853	0.986246	0.324012	0.628292	NS
chr1	1840354	1840944	.	open_46	13.3919	-0.790798	0.400676	-1.97366	0.0484202	0.291241	NS
chr1	1855887	1856074	.	open_47	6.38625	-1.21437	0.570723	-2.12777	0.0333561	0.244906	NS
chr1	1891077	1891760	.	open_48	104.446	0.147708	0.160941	0.91778	0.358734	0.652461	NS
chr1	1908863	1909485	.	open_49	94.6056	0.0419976	0.178112	0.235793	0.813594	0.920343	NS
chr1	1919287	1919736	.	open_50	37.669	0.288453	0.244193	1.18125	0.237502	0.556076	NS
chr1	2049883	2050466	.	open_51	100.11	0.0733415	0.172493	0.425186	0.670701	0.847307	NS
chr1	2133023	2133676	.	open_52	73.4397	0.0161095	0.185018	0.08707	0.930616	0.972792	NS
chr1	2139893	2140161	.	open_53	13.6798	0.119427	0.373252	0.319964	0.748996	0.888905	NS
chr1	2189552	2189837	.	open_54	26.7184	0.24923	0.275755	0.90381	0.366096	0.65763	NS
chr1	2194825	2195431	.	open_55	58.9754	-0.238169	0.194877	-1.22215	0.22165	0.540809	NS
chr1	2227684	2228083	.	open_56	139.903	0.067083	0.149734	0.448014	0.654143	0.838839	NS
chr1	2260023	2260219	.	open_57	5.56565	-0.924093	0.599651	-1.54105	0.123304	0.427641	NS
chr1	2381842	2382182	.	open_58	21.3903	-0.190424	0.326334	-0.583524	0.55954	0.783809	NS
chr1	2391165	2391884	.	open_59	141.872	-0.0206047	0.135334	-0.152251	0.878989	0.94996	NS
chr1	2412310	2412826	.	open_60	106.67	-0.0997981	0.151987	-0.656624	0.511423	0.753994	NS
chr1	2526044	2526777	.	open_61	128.923	0.109446	0.143851	0.760833	0.446757	0.714361	NS
chr1	2546031	2547128	.	open_62	105.648	-0.0693294	0.157224	-0.440959	0.659243	0.841407	NS
chr1	2586190	2586966	.	open_63	165.509	0.164885	0.125724	1.31148	0.189696	0.507365	NS
chr1	2643005	2643504	.	open_64	30.2675	0.112136	0.264602	0.423791	0.671718	0.848025	NS
chr1	2654594	2654882	.	open_65	12.0359	-0.161396	0.409196	-0.394423	0.693269	0.860005	NS
chr1	2683973	2684429	.	open_66	23.1865	-0.347969	0.308959	-1.12626	0.260054	0.576152	NS
chr1	2801776	2801969	.	open_67	8.70183	-0.556805	0.479953	-1.16012	0.245999	0.564039	NS
chr1	2854147	2854329	.	open_68	4.36652	-1.53064	0.72038	-2.12477	0.033606	0.245934	NS
chr1	3012604	3012821	.	open_69	9.47181	-1.28649	0.485924	-2.64751	0.00810858	0.110529	NS
chr1	3066397	3066708	.	open_70	14.4811	0.345652	0.367493	0.940568	0.346926	0.644013	NS
chr1	3069574	3070026	.	open_71	35.9219	-0.250893	0.246226	-1.01895	0.308225	0.61658	NS
chr1	3159400	3159608	.	open_72	5.70692	-1.11787	0.602326	-1.85592	0.0634645	0.330102	NS
chr1	3320057	3320346	.	open_73	12.0504	0.237603	0.431636	0.550471	0.581996	0.797077	NS
chr1	3378158	3378546	.	open_74	8.17311	-0.762464	0.513423	-1.48506	0.137528	0.446842	NS
chr1	3453232	3453589	.	open_75	23.8624	0.0632174	0.300514	0.210364	0.833383	0.929848	NS
chr1	3454081	3454333	.	open_76	10.2276	-0.10073	0.429738	-0.234398	0.814676	0.920698	NS
chr1	3491351	3491556	.	open_77	10.5623	-0.839139	0.441278	-1.90161	0.0572217	0.315966	NS
chr1	3624422	3625055	.	open_78	93.0006	-0.0482026	0.176067	-0.273774	0.784258	0.90557	NS
chr1	3649848	3650228	.	open_79	39.4096	0.0492659	0.243431	0.202381	0.839619	0.932295	NS
chr1	3747142	3747546	.	open_80	41.0294	0.289512	0.236021	1.22664	0.219958	0.53881	NS
chr1	3796279	3796867	.	open_81	66.3094	-0.230272	0.187037	-1.23116	0.218263	0.537212	NS
chr1	3801394	3801638	.	open_82	9.97814	0.210056	0.447073	0.469847	0.638464	0.829246	NS
chr1	3857003	3857654	.	open_83	130.868	-0.0710176	0.143211	-0.495894	0.619969	0.81843	NS
chr1	3900104	3901532	.	open_84	348.232	-0.0223852	0.119151	-0.187873	0.850976	0.937011	NS
chr1	3975990	3976406	.	open_85	13.0677	0.494279	0.405321	1.21948	0.222664	0.541689	NS
chr1	4395209	4395890	.	open_86	18.6976	1.12421	0.34431	3.2651	0.00109424	0.0305329	Gained
chr1	4408328	4408504	.	open_87	4.26874	-0.736233	0.665015	-1.10709	0.268254	0.582888	NS
chr1	4652689	4652869	.	open_88	12.606	-0.339171	0.405168	-0.837113	0.402529	0.683235	NS
chr1	4656203	4656668	.	open_89	25.0376	-0.0548501	0.278505	-0.196945	0.843871	0.934067	NS
chr1	5514517	5514789	.	open_90	9.70015	0.166543	0.445792	0.373589	0.70871	0.868504	NS
chr1	5611729	5612277	.	open_91	10.9775	1.6009	0.467721	3.42276	0.000619878	0.0212462	Gained
chr1	5745818	5746212	.	open_92	21.8157	-0.476505	0.298356	-1.5971	0.110243	0.410018	NS
chr1	5756820	5757002	.	open_93	5.15748	0.540916	0.632597	0.855073	0.392511	0.676819	NS
chr1	5975354	5975532	.	open_94	7.68795	-0.382867	0.515911	-0.742118	0.458016	0.721603	NS
chr1	5978719	5979081	.	open_95	9.99711	0.126806	0.442732	0.286418	0.774558	0.900746	NS
chr1	5992125	5992949	.	open_96	176.624	-0.0647522	0.12473	-0.519141	0.603663	0.809596	NS
chr1	6034461	6034686	.	open_97	12.8561	-0.112901	0.393071	-0.287228	0.773938	0.900514	NS
chr1	6075857	6076039	.	open_98	4.68698	0.600016	0.657454	0.912636	0.361434	0.654353	NS
chr1	6109017	6109210	.	open_99	6.31093	-0.725934	0.559202	-1.29816	0.194232	0.512542	NS
chr1	6199163	6200054	.	open_100	142.711	0.146467	0.13555	1.08054	0.279903	0.592982	NS
chr1	6204998	6206310	.	open_101	129.414	0.0821903	0.147358	0.55776	0.577008	0.794261	NS
chr1	6224783	6225250	.	open_102	12.7407	-0.0580976	0.429263	-0.135343	0.892341	0.955835	NS
chr1	6235927	6236333	.	open_103	61.9983	0.150283	0.185996	0.807993	0.419094	0.695436	NS
chr1	6245178	6246227	.	open_104	85.8808	-0.11699	0.162864	-0.718328	0.472555	0.730053	NS
chr1	6246442	6247079	.	open_105	42.3397	0.0650368	0.221835	0.293176	0.769387	0.898539	NS
chr1	6260059	6260316	.	open_106	23.3484	0.288793	0.290258	0.994954	0.319759	0.625307	NS
chr1	6363119	6363519	.	open_107	17.9949	-0.290796	0.329962	-0.881302	0.378154	0.666142	NS
chr1	6385915	6386117	.	open_108	11.0458	0.693067	0.428104	1.61892	0.105464	0.402871	NS
chr1	6393226	6394108	.	open_109	136.059	0.0540675	0.136844	0.395104	0.692766	0.859762	NS
chr1	6404841	6405069	.	open_110	9.15359	0.0221605	0.493454	0.044909	0.96418	0.986296	NS
chr1	6419588	6420041	.	open_111	23.7596	0.241617	0.296838	0.813969	0.415663	0.693101	NS
chr1	6438086	6438301	.	open_112	14.533	-0.777668	0.367936	-2.1136	0.0345495	0.249055	NS
chr1	6444981	6445332	.	open_113	13.015	-0.00926396	0.398384	-0.0232538	0.981448	0.992941	NS
chr1	6475652	6475913	.	open_114	13.2981	-0.135094	0.402437	-0.335689	0.737105	0.882434	NS
chr1	6489975	6490653	.	open_115	39.2342	-0.281512	0.239814	-1.17387	0.240445	0.558591	NS
chr1	6497530	6497834	.	open_116	18.9743	-0.172398	0.318296	-0.541629	0.588074	0.800516	NS
chr1	6523729	6524108	.	open_117	13.0831	-0.502949	0.397495	-1.2653	0.205765	0.523412	NS
chr1	6554260	6554655	.	open_118	39.1861	-0.208516	0.24568	-0.84873	0.396032	0.67903	NS
chr1	6579768	6580351	.	open_119	78.824	-0.0782187	0.166975	-0.468447	0.639465	0.82982	NS
chr1	6602264	6603322	.	open_120	240.072	0.110328	0.152229	0.724755	0.468602	0.727741	NS
chr1	6612953	6613960	.	open_121	235.238	0.0994178	0.12486	0.796234	0.425896	0.700232	NS
chr1	6624664	6625388	.	open_122	71.387	-0.217911	0.190097	-1.14631	0.251666	0.568969	NS
chr1	6634684	6634876	.	open_123	9.24257	0.069996	0.466184	0.150147	0.880649	0.950715	NS
chr1	6701422	6702029	.	open_124	69.3613	0.0128955	0.182677	0.0705916	0.943723	0.977989	NS
chr1	6707499	6707752	.	open_125	8.36824	0.660965	0.491133	1.3458	0.178368	0.495211	NS
chr1	6719919	6720191	.	open_126	7.43407	-1.31164	0.543957	-2.41129	0.0158961	0.164274	NS
chr1	6784546	6785441	.	open_127	342.668	0.00919439	0.113826	0.0807761	0.93562	0.974864	NS
chr1	7042692	7042882	.	open_128	5.85042	-0.948132	0.586204	-1.61741	0.10579	0.403277	NS
chr1	7136283	7136595	.	open_129	6.768	0.408896	0.547296	0.747122	0.45499	0.719669	NS
chr1	7208086	7208377	.	open_130	12.1691	-0.324172	0.393589	-0.823632	0.410149	0.688681	NS
chr1	7299506	7299745	.	open_131	7.18818	1.37977	0.552266	2.49838	0.0124761	0.143319	NS
chr1	7376556	7376762	.	open_132	6.25415	-0.734349	0.57507	-1.27697	0.201612	0.519542	NS
chr1	7401869	7402385	.	open_133	15.3219	1.55132	0.40037	3.87472	0.000106747	0.00663986	Gained
chr1	7471011	7471219	.	open_134	5.47972	1.83698	0.663437	2.76889	0.0056248	0.0878591	Gained
chr1	7667640	7667972	.	open_135	20.4766	-0.163716	0.320541	-0.510748	0.609527	0.81279	NS
chr1	7704546	7704764	.	open_136	43.672	-0.354857	0.231972	-1.52974	0.126081	0.431409	NS
chr1	7771006	7771831	.	open_137	60.0583	0.334386	0.197268	1.69509	0.0900586	0.379301	NS
chr1	7783521	7784346	.	open_138	222.207	0.0145352	0.123877	0.117336	0.906594	0.96255	NS
chr1	7827282	7827820	.	open_139	19.5166	-0.171846	0.31836	-0.539784	0.589346	0.801225	NS
chr1	7902755	7902981	.	open_140	10.0421	0.0175906	0.470011	0.0374259	0.970145	0.988888	NS
chr1	7961230	7961975	.	open_141	176.098	-0.0211377	0.125598	-0.168296	0.866351	0.944479	NS
chr1	7975157	7975517	.	open_142	22.754	-0.352921	0.332417	-1.06168	0.28838	0.600831	NS
chr1	8025456	8026547	.	open_143	210.924	0.164666	0.127927	1.28719	0.198027	0.516263	NS
chr1	8314199	8314703	.	open_144	19.1614	-0.32358	0.335702	-0.963891	0.335101	0.635696	NS
chr1	8371735	8371914	.	open_145	5.51709	-0.759534	0.607502	-1.25026	0.211206	0.529522	NS
chr1	8409187	8409450	.	open_146	9.22051	-0.536345	0.482913	-1.11065	0.266721	0.581851	NS
chr1	8422997	8423253	.	open_147	9.9563	-0.811963	0.452097	-1.79599	0.0724954	0.348914	NS
chr1	8423962	8424238	.	open_148	13.1187	0.262905	0.395701	0.664404	0.506432	0.751316	NS
chr1	8462281	8462491	.	open_149	6.43008	0.932453	0.611119	1.52581	0.127057	0.432579	NS
chr1	8463705	8463884	.	open_150	6.31062	-0.420028	0.554033	-0.758127	0.448375	0.71526	NS
chr1	8470058	8470247	.	open_151	3.83498	1.31851	0.739158	1.7838	0.0744562	0.352363	NS
chr1	8525393	8526256	.	open_152	48.4115	-0.058195	0.212391	-0.274	0.784085	0.905551	NS
chr1	8560497	8561349	.	open_153	19.2679	-0.669775	0.324767	-2.06232	0.0391768	0.26418	NS
chr1	8598069	8598878	.	open_154	27.7334	-0.134686	0.270476	-0.497961	0.618512	0.817779	NS
chr1	8626525	8626726	.	open_155	6.68945	1.03922	0.558819	1.85968	0.0629312	0.329036	NS
chr1	8629499	8629675	.	open_156	4.15652	-0.0574783	0.677257	-0.0848693	0.932365	0.973634	NS
chr1	8670555	8670932	.	open_157	10.0232	0.32434	0.440851	0.735713	0.461905	0.72375	NS
chr1	8703115	8703775	.	open_158	86.8259	-0.158716	0.167334	-0.948501	0.342875	0.640992	NS
chr1	8712190	8712995	.	open_159	55.6641	0.215625	0.2084	1.03467	0.300824	0.610597	NS
chr1	8726496	8727083	.	open_160	15.2427	-0.0958511	0.360634	-0.265785	0.790405	0.908711	NS
chr1	8817549	8818206	.	open_161	132.506	0.198779	0.144183	1.37866	0.167999	0.48268	NS
chr1	8848900	8849143	.	open_162	13.2173	-0.197945	0.386358	-0.512337	0.608415	0.812141	NS
chr1	8849309	8849513	.	open_163	6.34939	0.253788	0.565194	0.449028	0.653412	0.838178	NS
chr1	8856610	8856817	.	open_164	5.44308	0.922866	0.622352	1.48287	0.13811	0.447464	NS
chr1	8878114	8879357	.	open_165	180.843	0.0733451	0.122006	0.601159	0.547734	0.776294	NS
chr1	8988201	8988453	.	open_166	9.51373	-0.347264	0.471114	-0.737113	0.461054	0.723447	NS
chr1	9110873	9111170	.	open_167	14.8374	-0.300593	0.356244	-0.843785	0.398789	0.680966	NS
chr1	9129061	9129876	.	open_168	86.5522	0.0707117	0.165189	0.428066	0.668603	0.846373	NS
chr1	9182143	9182488	.	open_169	24.4176	0.14714	0.282586	0.520691	0.602582	0.809133	NS
chr1	9234250	9234995	.	open_170	73.8236	-0.0658839	0.174119	-0.378384	0.705145	0.866592	NS
chr1	9250023	9250269	.	open_171	9.77785	0.0247609	0.469342	0.0527566	0.957926	0.983756	NS
chr1	9292762	9292937	.	open_172	17.7037	0.18995	0.334998	0.56702	0.5707	0.790275	NS
chr1	9400729	9400927	.	open_173	5.64605	0.633049	0.576847	1.09743	0.272454	0.586989	NS
chr1	9428796	9429299	.	open_174	96.498	0.0687274	0.161364	0.425915	0.670169	0.847129	NS
chr1	9477783	9478005	.	open_175	6.96996	-0.0969018	0.551893	-0.175581	0.860623	0.941753	NS
chr1	9495319	9495608	.	open_176	12.8081	-0.15438	0.395998	-0.389849	0.696648	0.861867	NS
chr1	9539007	9539636	.	open_177	110.652	0.199994	0.148316	1.34844	0.177518	0.494011	NS
chr1	9539841	9540266	.	open_178	42.5416	0.121622	0.226271	0.537507	0.590917	0.802207	NS
chr1	9546588	9546807	.	open_179	4.70653	-0.894151	0.681459	-1.31211	0.189482	0.507098	NS
chr1	9546857	9547142	.	open_180	5.84336	0.410522	0.604612	0.678983	0.497149	0.745789	NS
chr1	9588326	9588803	.	open_181	69.7989	-0.19327	0.190403	-1.01506	0.310079	0.618022	NS
chr1	9615365	9615605	.	open_182	6.02596	-0.843761	0.576578	-1.4634	0.143359	0.454022	NS
chr1	9627032	9627441	.	open_183	28.0496	-0.379896	0.281425	-1.3499	0.177047	0.493382	NS
chr1	9651710	9652205	.	open_184	22.8908	-0.284263	0.34405	-0.826225	0.408676	0.687527	NS
chr1	9687369	9687865	.	open_185	35.7531	-0.102215	0.243954	-0.418994	0.675221	0.849962	NS
chr1	9689301	9689770	.	open_186	40.7159	0.158477	0.23503	0.674283	0.500131	0.747647	NS
chr1	9766746	9767283	.	open_187	15.21	1.31928	0.394791	3.34171	0.000832633	0.0254937	Gained
chr1	9769243	9769448	.	open_188	3.80925	-0.896663	0.737604	-1.21564	0.224121	0.543135	NS
chr1	9786761	9787127	.	open_189	9.02675	0.779714	0.476964	1.63474	0.102103	0.397964	NS
chr1	9823883	9824409	.	open_190	63.0545	-0.0397773	0.192228	-0.206927	0.836067	0.930841	NS
chr1	9910225	9911125	.	open_191	241.33	-0.169161	0.119296	-1.41799	0.156194	0.468635	NS
chr1	9942869	9943808	.	open_192	99.1791	0.070726	0.156966	0.450581	0.652292	0.837727	NS
chr1	9950236	9950578	.	open_193	15.0026	-0.13327	0.381549	-0.349287	0.726874	0.877408	NS
chr1	10032535	10033604	.	open_194	268.107	-0.0606044	0.113435	-0.534266	0.593158	0.803581	NS
chr1	10046041	10046266	.	open_195	5.79834	0.42856	0.57005	0.751793	0.452175	0.71788	NS
chr1	10209959	10210633	.	open_196	156.143	-0.091728	0.145643	-0.629812	0.528817	0.765237	NS
chr1	10211848	10212093	.	open_197	17.1152	-0.709063	0.348202	-2.03636	0.0417143	0.271587	NS
chr1	10253546	10253828	.	open_198	6.81028	0.00596453	0.537949	0.0110875	0.991154	0.996415	NS
chr1	10338087	10338281	.	open_199	7.5961	-0.56142	0.529231	-1.06082	0.288771	0.601158	NS
chr1	10377321	10377556	.	open_200	8.28273	-0.6284	0.497381	-1.26342	0.206439	0.52422	NS
chr1	10398466	10399410	.	open_201	171.591	-0.0337982	0.138436	-0.244143	0.80712	0.917113	NS
chr1	10430217	10431081	.	open_202	98.0001	0.00261204	0.172704	0.0151244	0.987933	0.995192	NS
chr1	10471989	10472748	.	open_203	126.319	-0.225668	0.146935	-1.53583	0.124579	0.429364	NS
chr1	10474805	10475422	.	open_204	92.6226	0.060173	0.165781	0.362967	0.716629	0.872053	NS
chr1	10494632	10494951	.	open_205	14.5876	0.018119	0.362314	0.0500091	0.960115	0.984706	NS
chr1	10507305	10507665	.	open_206	17.0436	-0.0387561	0.349903	-0.110763	0.911805	0.965	NS
chr1	10513322	10513501	.	open_207	5.77042	-0.79027	0.590259	-1.33885	0.180619	0.498052	NS
chr1	10519051	10519403	.	open_208	10.4962	0.384085	0.458934	0.836906	0.402645	0.683337	NS
chr1	10555903	10556336	.	open_209	11.7025	-0.547176	0.41207	-1.32787	0.18422	0.501711	NS
chr1	10788650	10788997	.	open_210	15.2826	-0.440917	0.362204	-1.21732	0.223484	0.542613	NS
chr1	10793798	10794388	.	open_211	46.6638	0.364195	0.222681	1.63551	0.101943	0.397844	NS
chr1	10796537	10796827	.	open_212	40.4653	0.195078	0.225279	0.86594	0.386523	0.67231	NS
chr1	10891180	10891445	.	open_213	6.0891	0.685153	0.576766	1.18792	0.234864	0.553623	NS
chr1	11012188	11013345	.	open_214	155.133	0.0497057	0.135022	0.36813	0.712776	0.870354	NS
chr1	11060002	11060508	.	open_215	101.3	-0.0214848	0.165681	-0.129675	0.896823	0.957643	NS
chr1	11099130	11100095	.	open_216	76.7087	0.0648682	0.183228	0.35403	0.723316	0.875352	NS
chr1	11241789	11242078	.	open_217	10.9981	0.118829	0.463416	0.256419	0.797628	0.912486	NS
chr1	11262092	11262992	.	open_218	185.643	0.0136688	0.139169	0.0982172	0.92176	0.969032	NS
chr1	11272701	11273735	.	open_219	142.617	-0.0862384	0.130812	-0.659255	0.509732	0.752896	NS
chr1	11337416	11337731	.	open_220	13.3019	-0.582857	0.379908	-1.53421	0.124979	0.429929	NS
chr1	11478780	11479691	.	open_221	114.263	0.106344	0.172871	0.615164	0.538447	0.77113	NS
chr1	11645834	11646138	.	open_222	15.4722	-0.839321	0.364258	-2.30419	0.0212117	0.193304	NS
chr1	11654734	11654913	.	open_223	17.2032	-0.471985	0.351848	-1.34145	0.179775	0.496819	NS
chr1	11663947	11664312	.	open_224	28.2217	-0.0343062	0.273642	-0.125369	0.900231	0.959372	NS
chr1	11680596	11681672	.	open_225	82.9757	-0.11757	0.176619	-0.665669	0.505623	0.750801	NS
chr1	11693093	11693545	.	open_226	13.1695	0.680168	0.391983	1.7352	0.0827056	0.366256	NS
chr1	11719907	11720085	.	open_227	8.72892	-0.394798	0.476568	-0.828418	0.407434	0.686749	NS
chr1	11735855	11736624	.	open_228	64.7512	0.0903535	0.18502	0.488345	0.625306	0.821687	NS
chr1	11805570	11806500	.	open_229	232.411	0.184897	0.134747	1.37218	0.170008	0.484932	NS
chr1	11838540	11838900	.	open_230	15.8063	-0.513656	0.384513	-1.33586	0.181595	0.499131	NS
chr1	11893931	11894133	.	open_231	9.98171	-0.6913	0.4435	-1.55874	0.119058	0.422008	NS
chr1	11907791	11909745	.	open_232	374.432	-0.114992	0.119704	-0.960635	0.336736	0.637033	NS
chr1	11926350	11926745	.	open_233	43.3738	-0.248872	0.219275	-1.13498	0.256384	0.57319	NS
chr1	11934362	11934944	.	open_234	39.868	0.0124207	0.227912	0.054498	0.956538	0.983336	NS
chr1	11979777	11980846	.	open_235	203.82	0.150122	0.123881	1.21182	0.22558	0.544848	NS
chr1	12019163	12019864	.	open_236	120.655	-0.110132	0.152081	-0.724165	0.468965	0.728052	NS
chr1	12124921	12125189	.	open_237	9.38711	-1.60638	0.495872	-3.2395	0.00119739	0.0325937	Lost
chr1	12208829	12209261	.	open_238	19.2404	-0.526177	0.330754	-1.59084	0.111645	0.411937	NS
chr1	12229902	12230342	.	open_239	41.067	-0.208082	0.236509	-0.879804	0.378965	0.666731	NS
chr1	12359310	12359569	.	open_240	6.33528	-0.508915	0.555305	-0.916461	0.359425	0.652841	NS
chr1	12480934	12481155	.	open_241	5.40562	0.851109	0.638999	1.33194	0.182879	0.500452	NS
chr1	12617985	12619055	.	open_242	71.6445	-0.145341	0.18345	-0.792268	0.428205	0.702237	NS
chr1	12619875	12620082	.	open_243	25.2017	-0.0288675	0.292454	-0.0987077	0.92137	0.968957	NS
chr1	12810761	12811164	.	open_244	10.3144	1.24999	0.471475	2.65123	0.00801986	0.109728	NS
chr1	12851795	12852182	.	open_245	13.3643	1.24726	0.434764	2.86881	0.00412016	0.0720109	Gained
chr1	13224716	13225060	.	open_246	10.1026	-0.589511	0.432969	-1.36155	0.173339	0.489075	NS
chr1	13524109	13524443	.	open_247	10.1345	1.90471	0.494457	3.85213	0.000117095	0.00708342	Gained
chr1	13597335	13597651	.	open_248	5.65238	0.813901	0.59812	1.36076	0.173588	0.489081	NS
chr1	13665748	13666114	.	open_249	13.9187	-0.341496	0.373413	-0.914524	0.360441	0.653582	NS
chr1	13748798	13749763	.	open_250	135.808	0.0331188	0.160872	0.205871	0.836892	0.931278	NS
chr1	13761713	13762389	.	open_251	10.1597	-1.24855	0.484456	-2.57723	0.00995971	0.12552	NS
chr1	14346324	14346628	.	open_252	7.16668	0.00314457	0.514334	0.00611387	0.995122	0.997809	NS
chr1	14731799	14732230	.	open_253	11.5709	0.552238	0.421717	1.3095	0.190365	0.508021	NS
chr1	14742315	14742971	.	open_254	17.3625	1.15688	0.357798	3.23334	0.00122351	0.0330162	Gained
chr1	14924655	14925045	.	open_255	16.5767	0.030531	0.349447	0.0873693	0.930378	0.972648	NS
chr1	14981623	14982008	.	open_256	10.1082	-0.284425	0.435105	-0.653694	0.513309	0.755075	NS
chr1	15028083	15028467	.	open_257	13.8426	1.21863	0.404738	3.01091	0.00260464	0.0542232	Gained
chr1	15100508	15100806	.	open_258	11.6821	-0.648109	0.411369	-1.57549	0.115143	0.417039	NS
chr1	15128613	15128851	.	open_259	13.7022	-0.721929	0.38707	-1.86511	0.0621657	0.327405	NS
chr1	15145416	15145859	.	open_260	9.83546	0.649473	0.45498	1.42748	0.153443	0.464947	NS
chr1	15152409	15152736	.	open_261	28.4867	0.00115037	0.2681	0.00429082	0.996576	0.998403	NS
chr1	15152956	15154372	.	open_262	114.431	-0.0180467	0.149433	-0.120768	0.903875	0.961384	NS
chr1	15272328	15273205	.	open_263	25.1297	0.385902	0.281895	1.36896	0.171013	0.486071	NS
chr1	15323467	15323958	.	open_264	16.7031	-0.69592	0.355797	-1.95594	0.0504718	0.297268	NS
chr1	15409430	15409958	.	open_265	41.8142	-0.186152	0.229285	-0.811878	0.416862	0.693745	NS
chr1	15431287	15431534	.	open_266	9.7668	-0.739628	0.470797	-1.57101	0.11618	0.418156	NS
chr1	15524224	15525364	.	open_267	346.284	0.0047134	0.100131	0.0470725	0.962455	0.985703	NS
chr1	15526480	15527061	.	open_268	206.282	0.0957566	0.122982	0.778623	0.436202	0.707439	NS
chr1	15603237	15603926	.	open_269	46.0195	0.149897	0.213484	0.702145	0.482589	0.737068	NS
chr1	15616928	15617850	.	open_270	100.625	-0.0194463	0.1711	-0.113654	0.909512	0.964073	NS
chr1	15681152	15681542	.	open_271	13.7173	0.433433	0.372571	1.16336	0.244684	0.563026	NS
chr1	15799959	15800469	.	open_272	16.4876	1.5091	0.369263	4.08678	4.37399e-05	0.00369288	Gained
chr1	15815523	15815756	.	open_273	9.11542	-0.742954	0.475228	-1.56336	0.117967	0.420811	NS
chr1	15834376	15836312	.	open_274	362.321	0.0703251	0.118224	0.594844	0.551948	0.778879	NS
chr1	15847302	15847897	.	open_275	147.735	0.0129318	0.137053	0.0943562	0.924826	0.970266	NS
chr1	15849356	15850101	.	open_276	70.687	0.046093	0.18315	0.251668	0.801297	0.914368	NS
chr1	15876375	15876688	.	open_277	12.5871	-0.303291	0.390671	-0.776336	0.437551	0.708253	NS
chr1	15886264	15886742	.	open_278	19.1635	-0.168251	0.324174	-0.519013	0.603751	0.809643	NS
chr1	15975470	15976240	.	open_279	69.1393	-0.0435839	0.174332	-0.250005	0.802583	0.914849	NS
chr1	16009104	16009372	.	open_280	13.2216	-0.73399	0.397721	-1.84549	0.0649663	0.333198	NS
chr1	16056119	16056351	.	open_281	15.4743	-0.497711	0.367044	-1.356	0.175099	0.490953	NS
chr1	16078887	16079269	.	open_282	17.9276	-0.317828	0.348016	-0.913256	0.361108	0.654067	NS
chr1	16111838	16112199	.	open_283	9.32262	0.640092	0.47044	1.36062	0.173632	0.489134	NS
chr1	16145230	16145408	.	open_284	10.2849	1.25869	0.461203	2.72914	0.00634988	0.0944043	Gained
chr1	16155701	16156267	.	open_285	62.8737	-0.221127	0.192334	-1.1497	0.250266	0.568135	NS
chr1	16187722	16188118	.	open_286	23.0591	-0.199702	0.320558	-0.622982	0.533297	0.768236	NS
chr1	16206374	16206999	.	open_287	61.792	0.0370039	0.188645	0.196156	0.844488	0.934294	NS
chr1	16236268	16237496	.	open_288	89.5667	-0.0339699	0.162492	-0.209057	0.834404	0.930272	NS
chr1	16254581	16254771	.	open_289	5.61786	-0.504923	0.578043	-0.873504	0.382388	0.669429	NS
chr1	16352013	16352884	.	open_290	100.201	0.00346705	0.161108	0.02152	0.982831	0.993364	NS
chr1	16366894	16367953	.	open_291	234.12	0.0385485	0.146033	0.263971	0.791802	0.909554	NS
chr1	16385412	16385588	.	open_292	4.21177	1.17911	0.692001	1.70391	0.0883975	0.377	NS
chr1	16385927	16386228	.	open_293	9.18208	-0.68675	0.467443	-1.46916	0.141789	0.452312	NS
chr1	16392720	16393003	.	open_294	6.81709	-0.719057	0.53755	-1.33766	0.181008	0.498441	NS
chr1	16440385	16441208	.	open_295	58.2181	-0.147694	0.198231	-0.74506	0.456236	0.720404	NS
chr1	16499025	16499685	.	open_296	74.6917	-0.0350471	0.173678	-0.201794	0.840078	0.93254	NS
chr1	16513412	16514635	.	open_297	113.252	-0.0764583	0.163863	-0.466599	0.640787	0.830635	NS
chr1	16605020	16605600	.	open_298	20.1582	-0.0666496	0.310309	-0.214785	0.829935	0.928045	NS
chr1	16607355	16607771	.	open_299	23.3076	-0.452919	0.301153	-1.50395	0.132594	0.440487	NS
chr1	16612854	16613974	.	open_300	289.447	-0.0634184	0.103161	-0.614751	0.538719	0.771199	NS
chr1	16636706	16637163	.	open_301	18.0501	0.239624	0.330842	0.724286	0.46889	0.728024	NS
chr1	16643832	16645006	.	open_302	109.369	0.0455004	0.146351	0.310898	0.755878	0.892012	NS
chr1	16678088	16678352	.	open_303	12.9892	-0.410144	0.416913	-0.983764	0.325232	0.629099	NS
chr1	16725482	16725785	.	open_304	12.2136	0.256898	0.393394	0.65303	0.513737	0.755373	NS
chr1	16727256	16727947	.	open_305	32.0494	-0.603136	0.263208	-2.29148	0.0219358	0.196942	NS
chr1	16889186	16889814	.	open_306	42.0584	-0.0409658	0.231219	-0.177173	0.859372	0.94128	NS
chr1	16896129	16897003	.	open_307	113.953	-0.0917739	0.147761	-0.621097	0.534536	0.76895	NS
chr1	16904501	16905737	.	open_308	249.799	0.0493368	0.123999	0.397879	0.690719	0.858497	NS
chr1	16913684	16914395	.	open_309	164.111	0.0722814	0.133319	0.542168	0.587703	0.800353	NS
chr1	16951635	16951936	.	open_310	23.4194	0.0649467	0.316353	0.205298	0.837339	0.931451	NS
chr1	16960711	16960926	.	open_311	22.8594	-0.179188	0.290981	-0.615807	0.538022	0.770964	NS
chr1	16961108	16961307	.	open_312	14.5277	-0.013319	0.372938	-0.0357138	0.971511	0.989277	NS
chr1	17011853	17012154	.	open_313	43.7034	-0.11545	0.239493	-0.482059	0.629764	0.823768	NS
chr1	17053803	17054416	.	open_314	147.475	-0.0903612	0.142516	-0.634043	0.526053	0.763436	NS
chr1	17069441	17069669	.	open_315	6.48534	0.171278	0.53458	0.320398	0.748667	0.888785	NS
chr1	17125867	17126192	.	open_316	19.7706	-0.198259	0.317066	-0.625293	0.531779	0.767164	NS
chr1	17237022	17237256	.	open_317	11.9527	0.039279	0.428559	0.0916535	0.926973	0.971243	NS
chr1	17406169	17406430	.	open_318	15.0811	0.417877	0.361906	1.15466	0.248231	0.566242	NS
chr1	17419964	17420218	.	open_319	13.0981	-0.770635	0.404465	-1.90532	0.0567387	0.314786	NS
chr1	17439540	17439894	.	open_320	34.0222	0.236	0.243975	0.96731	0.333389	0.634516	NS
chr1	17498145	17498362	.	open_321	5.41306	-1.01008	0.621125	-1.62622	0.103904	0.400671	NS
chr1	17942865	17943109	.	open_322	5.144	-0.933257	0.641565	-1.45466	0.145764	0.456429	NS
chr1	18283030	18283299	.	open_323	6.39454	-0.802251	0.555354	-1.44457	0.148577	0.459763	NS
chr1	18480408	18480973	.	open_324	16.8941	0.973013	0.362924	2.68104	0.00733948	0.103698	NS
chr1	18555057	18555246	.	open_325	4.0808	1.15467	0.735718	1.56945	0.116543	0.418726	NS
chr1	18581396	18581645	.	open_326	10.9491	-1.1045	0.43807	-2.52128	0.0116929	0.138037	NS
chr1	18597303	18597628	.	open_327	14.8643	0.0122149	0.373961	0.0326635	0.973943	0.990184	NS
chr1	18742800	18743141	.	open_328	7.06969	-1.14661	0.548456	-2.09062	0.0365621	0.255243	NS
chr1	18820832	18821199	.	open_329	16.1752	0.160808	0.356525	0.451044	0.651958	0.837481	NS
chr1	18884217	18884695	.	open_330	16.653	-0.551079	0.375513	-1.46754	0.14223	0.452696	NS
chr1	18902458	18903196	.	open_331	105.99	0.0838063	0.154792	0.541412	0.588224	0.800581	NS
chr1	18912995	18913407	.	open_332	20.0561	-0.302427	0.314833	-0.960595	0.336756	0.637033	NS
chr1	18956475	18957077	.	open_333	105.527	0.00145366	0.168986	0.00860227	0.993136	0.997099	NS
chr1	19010807	19011210	.	open_334	11.9105	-0.341363	0.405598	-0.841628	0.399996	0.681849	NS
chr1	19209696	19210857	.	open_335	179.868	0.0779349	0.135331	0.575883	0.564694	0.787011	NS
chr1	19251299	19251894	.	open_336	62.1359	-0.0476222	0.190575	-0.249887	0.802675	0.914901	NS
chr1	19311785	19312526	.	open_337	84.6208	-0.131316	0.174146	-0.754053	0.450817	0.717265	NS
chr1	19433116	19433310	.	open_338	6.28132	-0.895649	0.555918	-1.61112	0.107154	0.4052	NS
chr1	19445914	19446220	.	open_339	13.8097	-0.554559	0.408793	-1.35658	0.174916	0.490931	NS
chr1	19485155	19486112	.	open_340	130.513	0.0562735	0.145812	0.385932	0.699547	0.86354	NS
chr1	19596634	19597501	.	open_341	87.0571	0.0909046	0.167724	0.541988	0.587827	0.800403	NS
chr1	19651111	19651505	.	open_342	20.2916	-0.655724	0.326202	-2.01018	0.0444121	0.279662	NS
chr1	19659768	19660206	.	open_343	27.0339	-0.237057	0.268212	-0.883843	0.376781	0.665297	NS
chr1	19704496	19704770	.	open_344	16.3775	-0.53698	0.350961	-1.53003	0.12601	0.431329	NS
chr1	19715608	19715920	.	open_345	22.2475	-0.425312	0.304207	-1.3981	0.162084	0.475084	NS
chr1	19882141	19882763	.	open_346	93.3136	0.107047	0.156922	0.682169	0.495132	0.744684	NS
chr1	19917973	19918220	.	open_347	8.46622	-0.511988	0.481434	-1.06346	0.287571	0.600244	NS
chr1	19949061	19949313	.	open_348	7.11397	0.936745	0.536414	1.74631	0.0807569	0.362427	NS
chr1	20100989	20101480	.	open_349	12.4646	0.510944	0.396282	1.28934	0.197278	0.515259	NS
chr1	20141061	20141404	.	open_350	7.56112	-0.551341	0.508637	-1.08396	0.278383	0.591888	NS
chr1	20152399	20152744	.	open_351	16.2486	-0.674576	0.345798	-1.95078	0.051083	0.299311	NS
chr1	20187228	20187445	.	open_352	6.02915	0.676347	0.565013	1.19705	0.231289	0.549477	NS
chr1	20199033	20199273	.	open_353	5.54946	0.690554	0.588627	1.17316	0.240732	0.558866	NS
chr1	20211467	20211719	.	open_354	9.11298	0.700837	0.469906	1.49144	0.135846	0.445115	NS
chr1	20281978	20282158	.	open_355	6.95727	1.3266	0.571085	2.32295	0.0201817	0.18807	NS
chr1	20411334	20411525	.	open_356	6.80937	2.14891	0.615366	3.49208	0.000479273	0.0179256	Gained
chr1	20444096	20444438	.	open_357	8.83306	0.869546	0.480161	1.81094	0.0701495	0.343514	NS
chr1	20494572	20495101	.	open_358	17.322	0.744742	0.343703	2.16682	0.0302488	0.233173	NS
chr1	20507408	20508304	.	open_359	61.8768	-0.0435698	0.193305	-0.225394	0.821673	0.923923	NS
chr1	20522471	20522764	.	open_360	11.9381	-0.0797647	0.406911	-0.196025	0.844591	0.934294	NS
chr1	20608208	20608443	.	open_361	6.02933	-1.02232	0.590499	-1.73128	0.0834022	0.367157	NS
chr1	20613869	20614141	.	open_362	9.18132	1.16818	0.491556	2.37648	0.0174786	0.173638	NS
chr1	20633688	20634050	.	open_363	22.6417	-0.207064	0.302944	-0.683505	0.494287	0.74413	NS
chr1	20661149	20661922	.	open_364	151.047	-0.131267	0.136987	-0.958243	0.33794	0.637855	NS
chr1	20696467	20697220	.	open_365	38.1151	-0.12954	0.241227	-0.537004	0.591265	0.802434	NS
chr1	20732186	20732398	.	open_366	17.8843	0.0631621	0.344424	0.183385	0.854496	0.938715	NS
chr1	20733292	20733580	.	open_367	13.8374	-0.0867593	0.388053	-0.223576	0.823087	0.924682	NS
chr1	20786247	20787606	.	open_368	279.705	0.00964481	0.116327	0.082911	0.933922	0.974215	NS
chr1	21022380	21022625	.	open_369	7.37427	1.06929	0.542503	1.97104	0.0487198	0.292225	NS
chr1	21149517	21150342	.	open_370	33.7774	0.0743656	0.257193	0.289144	0.772472	0.89995	NS
chr1	21176669	21177256	.	open_371	97.8049	0.0258052	0.169335	0.152391	0.878878	0.949939	NS
chr1	21184474	21184657	.	open_372	5.57983	-0.824069	0.614158	-1.34179	0.179665	0.496631	NS
chr1	21195129	21195582	.	open_373	16.7174	-0.413704	0.350891	-1.17901	0.238395	0.556952	NS
chr1	21232105	21232288	.	open_374	8.29104	-0.564482	0.484264	-1.16565	0.243756	0.562184	NS
chr1	21255333	21255650	.	open_375	14.0829	-0.5172	0.371936	-1.39056	0.164358	0.477674	NS
chr1	21289596	21290225	.	open_376	32.9095	-0.306321	0.251398	-1.21847	0.223045	0.542143	NS
chr1	21324520	21324841	.	open_377	12.3459	1.16518	0.408336	2.85349	0.00432414	0.0744449	Gained
chr1	21334859	21335124	.	open_378	10.5092	-0.728662	0.448583	-1.62436	0.104299	0.401151	NS
chr1	21345455	21345896	.	open_379	55.7643	-0.22519	0.212536	-1.05953	0.289357	0.601656	NS
chr1	21368482	21368745	.	open_380	16.5037	-0.256021	0.343873	-0.744521	0.456561	0.72062	NS
chr1	21439789	21440411	.	open_381	51.8055	-0.130641	0.208765	-0.62578	0.531459	0.766993	NS
chr1	21509005	21509222	.	open_382	13.5364	0.0416193	0.376271	0.11061	0.911926	0.965	NS
chr1	21638555	21639010	.	open_383	9.8555	0.833139	0.45868	1.81638	0.0693113	0.341936	NS
chr1	21764770	21765337	.	open_384	20.9213	1.46294	0.337013	4.34089	1.41905e-05	0.00177903	Gained
chr1	21782345	21783905	.	open_385	209.735	0.0797192	0.126424	0.63057	0.528321	0.764945	NS
chr1	21899866	21900144	.	open_386	7.01692	0.213431	0.519231	0.411053	0.681034	0.852908	NS
chr1	21964064	21964711	.	open_387	17.9518	-0.361707	0.355978	-1.01609	0.309584	0.617634	NS
chr1	22024928	22026140	.	open_388	95.3983	0.130362	0.157634	0.826987	0.408244	0.687298	NS
chr1	22052238	22052878	.	open_389	81.448	0.0422349	0.175727	0.240343	0.810064	0.918468	NS
chr1	22053285	22053716	.	open_390	34.8151	0.215108	0.242665	0.886443	0.375379	0.664314	NS
chr1	22081519	22081797	.	open_391	7.5659	-0.738087	0.516925	-1.42784	0.153338	0.464841	NS
chr1	22091005	22091208	.	open_392	5.01876	0.705273	0.662879	1.06395	0.28735	0.599966	NS
chr1	22105556	22105864	.	open_393	9.92856	-0.363785	0.451888	-0.805033	0.420801	0.696765	NS
chr1	22420549	22420741	.	open_394	19.361	-0.699335	0.328366	-2.12974	0.0331927	0.244378	NS
chr1	22428738	22428924	.	open_395	10.3544	-0.182005	0.434733	-0.41866	0.675465	0.85016	NS
chr1	22451692	22452529	.	open_396	76.6809	-0.118789	0.17326	-0.685613	0.492957	0.743331	NS
chr1	22578173	22578362	.	open_397	9.98842	0.100216	0.438758	0.228409	0.819329	0.922826	NS
chr1	22579058	22579353	.	open_398	11.7266	-0.0284129	0.408684	-0.0695228	0.944573	0.978332	NS
chr1	22704269	22704759	.	open_399	22.3492	-0.204143	0.302337	-0.675218	0.499537	0.747196	NS
chr1	22816176	22816374	.	open_400	6.17328	0.370644	0.568533	0.65193	0.514447	0.755869	NS
chr1	22831865	22832512	.	open_401	22.0407	1.12023	0.327087	3.42488	0.000615079	0.0211971	Gained
chr1	22889206	22889600	.	open_402	10.7932	0.141492	0.438303	0.322818	0.746833	0.887691	NS
chr1	22976362	22976825	.	open_403	30.9678	-0.0839727	0.269067	-0.312088	0.754973	0.891661	NS
chr1	23019063	23019992	.	open_404	100.539	-0.130023	0.167043	-0.778376	0.436347	0.707558	NS
chr1	23098795	23099028	.	open_405	15.9927	-0.549226	0.36891	-1.48878	0.136546	0.445987	NS
chr1	23100109	23100365	.	open_406	8.79078	0.00937991	0.484409	0.0193636	0.984551	0.993916	NS
chr1	23167571	23168009	.	open_407	25.9318	0.120637	0.289218	0.417115	0.676594	0.850699	NS
chr1	23168549	23168976	.	open_408	36.0361	-0.124351	0.250718	-0.495981	0.619908	0.81843	NS
chr1	23196872	23197084	.	open_409	6.62949	1.8967	0.642422	2.95242	0.0031529	0.0610336	Gained
chr1	23252581	23252873	.	open_410	6.12616	0.291311	0.577724	0.504239	0.614093	0.815293	NS
chr1	23343943	23344844	.	open_411	234.579	0.109994	0.120026	0.91642	0.359446	0.652841	NS
chr1	23367970	23369201	.	open_412	289.601	0.0414616	0.116806	0.354962	0.722618	0.875064	NS
chr1	23403773	23404318	.	open_413	26.29	0.327315	0.286239	1.1435	0.25283	0.569946	NS
chr1	23484118	23484943	.	open_414	112.305	0.0385541	0.162004	0.237983	0.811895	0.919522	NS
chr1	23497265	23497479	.	open_415	8.75647	-0.751051	0.503454	-1.4918	0.135752	0.444995	NS
chr1	23530589	23531606	.	open_416	72.4012	0.0676097	0.177957	0.379922	0.704004	0.866011	NS
chr1	23539562	23540039	.	open_417	24.8828	-0.363093	0.281477	-1.28996	0.197066	0.515065	NS
chr1	23544624	23545190	.	open_418	26.6631	-0.131765	0.271609	-0.485126	0.627587	0.822639	NS
chr1	23555030	23555221	.	open_419	65.37	-0.193222	0.184365	-1.04804	0.29462	0.605887	NS
chr1	23556089	23556446	.	open_420	72.6332	-0.234314	0.185848	-1.26078	0.207387	0.52559	NS
chr1	23556651	23556831	.	open_421	42.7512	0.0711761	0.235699	0.301978	0.762668	0.895356	NS
chr1	23559172	23559682	.	open_422	164.158	-0.0241816	0.139369	-0.173507	0.862253	0.942405	NS
chr1	23562399	23562592	.	open_423	55.5161	-0.0779726	0.201845	-0.3863	0.699275	0.863379	NS
chr1	23634907	23635414	.	open_424	23.6126	-0.203243	0.303058	-0.67064	0.50245	0.74873	NS
chr1	23637339	23637710	.	open_425	20.4084	-0.30868	0.310082	-0.99548	0.319503	0.625101	NS
chr1	23691456	23692213	.	open_426	68.9818	-0.109075	0.184422	-0.591443	0.554224	0.78052	NS
chr1	23743068	23744022	.	open_427	72.9101	-0.247054	0.175558	-1.40725	0.159353	0.472074	NS
chr1	23744572	23744906	.	open_428	16.4908	0.309901	0.347928	0.890705	0.373088	0.662375	NS
chr1	23760981	23761157	.	open_429	4.48516	0.578813	0.66203	0.874301	0.381954	0.669164	NS
chr1	23771966	23772506	.	open_430	24.6409	-0.293599	0.284435	-1.03222	0.301969	0.611296	NS
chr1	23777923	23778938	.	open_431	83.9677	-0.0818497	0.164692	-0.496988	0.619198	0.818087	NS
chr1	23790685	23791743	.	open_432	63.8967	0.24014	0.187334	1.28188	0.199883	0.517897	NS
chr1	23800558	23801071	.	open_433	93.5485	0.209658	0.156825	1.33689	0.181259	0.498627	NS
chr1	23825242	23825656	.	open_434	33.7913	-0.0534972	0.24287	-0.220271	0.82566	0.925908	NS
chr1	23867585	23868665	.	open_435	54.8241	-0.0674708	0.211947	-0.318337	0.750229	0.88959	NS
chr1	23916779	23917328	.	open_436	21.0873	-0.336589	0.304781	-1.10436	0.269436	0.584093	NS
chr1	23959035	23960254	.	open_437	180.983	-0.0719026	0.134992	-0.532642	0.594281	0.804166	NS
chr1	23964964	23965379	.	open_438	13.4968	-0.174977	0.399115	-0.438412	0.661088	0.842577	NS
chr1	23979900	23980871	.	open_439	140.984	0.0362657	0.144362	0.251215	0.801648	0.9145	NS
chr1	24070927	24071161	.	open_440	13.0859	-0.548234	0.383067	-1.43117	0.152382	0.464035	NS
chr1	24150455	24150821	.	open_441	17.4136	-0.567963	0.344467	-1.64881	0.0991858	0.39404	NS
chr1	24199395	24199671	.	open_442	12.8815	0.440882	0.417581	1.0558	0.29106	0.603149	NS
chr1	24201988	24202304	.	open_443	14.4797	-0.324934	0.369437	-0.879536	0.37911	0.666806	NS
chr1	24251135	24251330	.	open_444	5.99407	-1.10383	0.586701	-1.88143	0.059914	0.321623	NS
chr1	24266376	24266993	.	open_445	20.0668	1.58222	0.350516	4.51398	6.36226e-06	0.00103234	Gained
chr1	24392035	24392713	.	open_446	30.0761	-0.0517699	0.277503	-0.186556	0.852009	0.937472	NS
chr1	24413469	24413911	.	open_447	64.2189	-0.0722801	0.189849	-0.380724	0.703408	0.865641	NS
chr1	24415210	24415892	.	open_448	123.412	-0.230504	0.166604	-1.38354	0.166498	0.480623	NS
chr1	24502292	24502987	.	open_449	91.9168	-0.0551878	0.165911	-0.332635	0.73941	0.883758	NS
chr1	24642615	24643733	.	open_450	234.092	0.0367335	0.115331	0.318504	0.750102	0.889524	NS
chr1	24683731	24683977	.	open_451	8.89885	1.70346	0.516867	3.29575	0.000981594	0.0283942	Gained
chr1	24688320	24688944	.	open_452	18.5248	-0.35789	0.33927	-1.05488	0.291479	0.60328	NS
chr1	24717526	24717731	.	open_453	5.12669	0.986585	0.635411	1.55267	0.120502	0.424025	NS
chr1	24735488	24736028	.	open_454	10.5864	0.501844	0.426129	1.17768	0.238923	0.557456	NS
chr1	24744951	24745858	.	open_455	247.238	0.0240832	0.135683	0.177496	0.859119	0.941137	NS
chr1	24830629	24830918	.	open_456	10.3179	-0.762635	0.450785	-1.69179	0.0906858	0.380166	NS
chr1	24847823	24848442	.	open_457	24.3386	-0.111732	0.292781	-0.381622	0.702742	0.865225	NS
chr1	24874878	24875252	.	open_458	8.14628	0.48595	0.506138	0.960113	0.336998	0.637182	NS
chr1	24898215	24898501	.	open_459	13.2876	0.10814	0.391351	0.276324	0.782299	0.904869	NS
chr1	24930278	24930513	.	open_460	36.2345	-0.25439	0.243155	-1.0462	0.295467	0.60642	NS
chr1	25047765	25047989	.	open_461	7.46885	-0.633284	0.529472	-1.19607	0.231671	0.549851	NS
chr1	25128616	25128822	.	open_462	4.51047	-1.63438	0.722132	-2.26328	0.0236187	0.205049	NS
chr1	25218273	25218451	.	open_463	4.52649	-0.74545	0.682752	-1.09183	0.274907	0.589027	NS
chr1	25232090	25232801	.	open_464	54.9907	-0.260515	0.200194	-1.30131	0.193151	0.511232	NS
chr1	25239519	25240396	.	open_465	145.986	0.0518449	0.13867	0.373874	0.708498	0.868372	NS
chr1	25246856	25248022	.	open_466	283.331	0.0505178	0.111902	0.451446	0.651668	0.837285	NS
chr1	25267920	25268131	.	open_467	12.3848	0.167342	0.424844	0.39389	0.693662	0.860199	NS
chr1	25338231	25339112	.	open_468	98.063	0.196139	0.159377	1.23066	0.21845	0.53746	NS
chr1	25430103	25431031	.	open_469	178.454	0.0151784	0.127704	0.118855	0.90539	0.962069	NS
chr1	25503553	25503828	.	open_470	7.27319	-0.259947	0.530755	-0.489768	0.624298	0.820906	NS
chr1	25543291	25543703	.	open_471	29.0298	-0.115352	0.281257	-0.410129	0.681711	0.853287	NS
chr1	25616279	25616686	.	open_472	34.3375	-0.277309	0.247289	-1.12139	0.26212	0.577539	NS
chr1	25819691	25820441	.	open_473	76.1139	0.185077	0.174718	1.05929	0.289467	0.601685	NS
chr1	25858855	25859791	.	open_474	64.0175	-0.0046927	0.182913	-0.0256553	0.979532	0.992337	NS
chr1	25892553	25892767	.	open_475	14.2677	0.705389	0.375589	1.87809	0.0603688	0.322448	NS
chr1	25895396	25895823	.	open_476	28.5239	-0.175112	0.265782	-0.658857	0.509988	0.753054	NS
chr1	25905116	25906753	.	open_477	167.354	0.017343	0.125188	0.138535	0.889818	0.954593	NS
chr1	25922591	25922790	.	open_478	6.84836	-0.860012	0.535273	-1.60668	0.108124	0.406379	NS
chr1	25997663	25998566	.	open_479	171.69	0.0354345	0.153281	0.231174	0.81718	0.921875	NS
chr1	26035220	26036385	.	open_480	90.5718	0.0524134	0.164118	0.319364	0.74945	0.889209	NS
chr1	26070493	26070692	.	open_481	5.39276	-0.555456	0.605645	-0.917131	0.359074	0.652641	NS
chr1	26110947	26112420	.	open_482	225.379	0.0511369	0.115944	0.441047	0.659179	0.841407	NS
chr1	26118844	26119140	.	open_483	7.03379	-0.321315	0.52511	-0.611899	0.540604	0.772232	NS
chr1	26145142	26145500	.	open_484	20.2814	-0.198706	0.30904	-0.64298	0.520237	0.759605	NS
chr1	26169587	26170263	.	open_485	54.7913	0.156285	0.211792	0.73792	0.460563	0.723095	NS
chr1	26198470	26198685	.	open_486	5.87642	-0.946512	0.599387	-1.57913	0.114305	0.416022	NS
chr1	26233675	26234632	.	open_487	215.744	-0.00444824	0.119091	-0.0373515	0.970205	0.988888	NS
chr1	26275738	26275990	.	open_488	15.4519	0.271441	0.359168	0.75575	0.449799	0.716504	NS
chr1	26279667	26280245	.	open_489	47.2075	0.254242	0.210743	1.20641	0.22766	0.546639	NS
chr1	26306230	26306816	.	open_490	83.1203	-0.151382	0.163478	-0.926006	0.354443	0.649451	NS
chr1	26336229	26336705	.	open_491	23.2977	-0.0506136	0.295943	-0.171025	0.864204	0.943423	NS
chr1	26417162	26417351	.	open_492	13.7365	-0.401098	0.393498	-1.01931	0.308054	0.616448	NS
chr1	26431920	26432714	.	open_493	107.07	0.0331085	0.152682	0.216846	0.828328	0.927445	NS
chr1	26471876	26473295	.	open_494	180.451	0.0575316	0.126458	0.454948	0.649147	0.835806	NS
chr1	26500191	26501424	.	open_495	118.273	-0.0213356	0.144579	-0.14757	0.882682	0.951487	NS
chr1	26524558	26524768	.	open_496	7.06635	-0.56798	0.520405	-1.09142	0.275089	0.589194	NS
chr1	26529639	26529820	.	open_497	29.258	-0.395198	0.290773	-1.35913	0.174106	0.489915	NS
chr1	26530995	26531420	.	open_498	26.945	0.415502	0.309034	1.34452	0.178781	0.495432	NS
chr1	26538000	26538182	.	open_499	7.90989	-0.859192	0.525723	-1.63431	0.102194	0.398045	NS
chr1	26602479	26602761	.	open_500	12.0327	-0.523448	0.438285	-1.19431	0.232357	0.550567	NS
chr1	26620214	26621549	.	open_501	191.896	0.0392525	0.124365	0.315623	0.752288	0.890557	NS
chr1	26636681	26637005	.	open_502	12.6209	-0.3582	0.399066	-0.897594	0.369402	0.659833	NS
chr1	26677448	26677924	.	open_503	25.2601	-0.156059	0.28951	-0.539046	0.589855	0.801676	NS
chr1	26692315	26693279	.	open_504	115.871	-0.186658	0.149348	-1.24982	0.211366	0.529674	NS
chr1	26695422	26695933	.	open_505	83.5372	0.0716161	0.171189	0.418345	0.675695	0.850298	NS
chr1	26698124	26698400	.	open_506	28.5154	0.049772	0.267033	0.186389	0.85214	0.937534	NS
chr1	26726705	26726908	.	open_507	5.62894	0.171742	0.574605	0.298887	0.765026	0.896356	NS
chr1	26771612	26771964	.	open_508	18.3456	1.72542	0.370686	4.65467	3.24498e-06	0.000665092	Gained
chr1	26787490	26788422	.	open_509	115.175	0.00114907	0.146771	0.00782901	0.993753	0.997181	NS
chr1	26789117	26789368	.	open_510	29.8609	-0.208237	0.272984	-0.762818	0.445572	0.713529	NS
chr1	26799749	26799951	.	open_511	4.76585	-0.452537	0.648531	-0.697787	0.48531	0.738875	NS
chr1	26800034	26800231	.	open_512	3.8233	1.01593	0.715328	1.42023	0.15554	0.467797	NS
chr1	26826438	26826695	.	open_513	21.9413	-0.769828	0.306253	-2.5137	0.0119473	0.139979	NS
chr1	26849398	26849667	.	open_514	10.3583	1.38904	0.459284	3.02436	0.0024916	0.0526794	Gained
chr1	26864672	26865573	.	open_515	137.965	-0.0532782	0.139196	-0.382757	0.7019	0.864738	NS
chr1	26889884	26890754	.	open_516	49.5881	0.07638	0.20721	0.368611	0.712418	0.870267	NS
chr1	26899899	26900681	.	open_517	35.557	0.0568141	0.245016	0.231879	0.816632	0.921671	NS
chr1	26907696	26907895	.	open_518	6.428	1.35698	0.573746	2.36512	0.0180244	0.176743	NS
chr1	26921307	26922231	.	open_519	107.292	0.0355445	0.159265	0.223178	0.823397	0.924833	NS
chr1	26967041	26967257	.	open_520	8.18937	-0.306869	0.482726	-0.635699	0.524973	0.76272	NS
chr1	26993608	26993993	.	open_521	75.6928	-0.15809	0.188871	-0.837025	0.402578	0.683242	NS
chr1	27012482	27013316	.	open_522	94.7751	0.002768	0.156469	0.0176905	0.985886	0.994352	NS
chr1	27033510	27033727	.	open_523	6.41581	1.16374	0.584051	1.99253	0.0463127	0.285397	NS
chr1	27044482	27044982	.	open_524	19.5122	-0.510693	0.319671	-1.59756	0.110142	0.409935	NS
chr1	27097504	27097691	.	open_525	13.5155	0.111628	0.405924	0.274998	0.783318	0.90527	NS
chr1	27154551	27155382	.	open_526	161.611	0.118072	0.142654	0.827679	0.407852	0.687096	NS
chr1	27233969	27234878	.	open_527	176.32	-0.051919	0.137998	-0.37623	0.706746	0.867429	NS
chr1	27284641	27284877	.	open_528	9.12939	0.0245649	0.475951	0.0516122	0.958838	0.984044	NS
chr1	27321906	27322571	.	open_529	106.921	-0.0168221	0.155944	-0.107873	0.914096	0.966174	NS
chr1	27365445	27366387	.	open_530	126.945	-0.030085	0.140955	-0.213437	0.830986	0.928569	NS
chr1	27366592	27367031	.	open_531	44.7358	-0.125767	0.21977	-0.572265	0.567142	0.788569	NS
chr1	27392344	27392770	.	open_532	58.1612	-0.194111	0.192664	-1.00751	0.31369	0.620894	NS
chr1	27476112	27476388	.	open_533	6.08649	-0.534493	0.564853	-0.946252	0.34402	0.641672	NS
chr1	27489717	27490671	.	open_534	147.636	0.0736079	0.135866	0.541768	0.587978	0.800476	NS
chr1	27542619	27542890	.	open_535	8.43971	0.824239	0.500837	1.64572	0.0998208	0.395037	NS
chr1	27556713	27556939	.	open_536	10.3328	-0.293061	0.441745	-0.663418	0.507063	0.751828	NS
chr1	27568403	27568841	.	open_537	51.1954	-0.148738	0.235669	-0.631132	0.527954	0.76468	NS
chr1	27575329	27575682	.	open_538	32.0318	0.132488	0.251523	0.526743	0.598372	0.806667	NS
chr1	27575942	27576186	.	open_539	22.9404	-0.353572	0.308821	-1.14491	0.252247	0.56927	NS
chr1	27603886	27604343	.	open_540	56.6974	0.034464	0.196818	0.175106	0.860996	0.941806	NS
chr1	27624373	27624565	.	open_541	5.37776	-1.10489	0.616746	-1.79149	0.0732149	0.350079	NS
chr1	27643974	27644283	.	open_542	11.9791	0.364605	0.404547	0.901267	0.367446	0.658579	NS
chr1	27663379	27663593	.	open_543	10.4135	0.530236	0.436963	1.21346	0.224955	0.544161	NS
chr1	27671829	27672688	.	open_544	57.4562	0.782021	0.192591	4.06052	4.89643e-05	0.00400902	Gained
chr1	27725478	27726163	.	open_545	176.113	-0.220125	0.132243	-1.66456	0.0960007	0.389385	NS
chr1	27772922	27773722	.	open_546	120.838	0.0289033	0.152994	0.188918	0.850157	0.936574	NS
chr1	27830463	27831412	.	open_547	99.3054	0.204607	0.163215	1.2536	0.209986	0.52834	NS
chr1	27858195	27858696	.	open_548	12.7622	0.492864	0.398067	1.23814	0.215663	0.534316	NS
chr1	27914317	27915174	.	open_549	145.614	0.0726285	0.143618	0.505707	0.613062	0.814558	NS
chr1	27925301	27925548	.	open_550	5.20278	-1.10858	0.639791	-1.73273	0.0831443	0.366691	NS
chr1	27934852	27935411	.	open_551	28.1997	-0.330929	0.266522	-1.24166	0.214364	0.533153	NS
chr1	27959879	27960218	.	open_552	30.0441	0.0170971	0.273332	0.0625508	0.950124	0.980531	NS
chr1	27980769	27981208	.	open_553	9.01327	0.171707	0.462253	0.371457	0.710297	0.869111	NS
chr1	28088015	28089004	.	open_554	91.2253	-0.193123	0.176309	-1.09536	0.273357	0.587444	NS
chr1	28129297	28129485	.	open_555	6.55236	1.70955	0.584329	2.92567	0.0034372	0.0642367	Gained
chr1	28232785	28233218	.	open_556	40.9585	0.0790116	0.229729	0.343934	0.730896	0.879272	NS
chr1	28235784	28236540	.	open_557	87.5774	-0.160934	0.16548	-0.972524	0.33079	0.632861	NS
chr1	28246982	28247780	.	open_558	119.445	-0.101141	0.153071	-0.660747	0.508775	0.752553	NS
chr1	28248192	28248654	.	open_559	27.3049	-0.557501	0.269263	-2.07047	0.0384083	0.261374	NS
chr1	28259129	28260332	.	open_560	151.342	0.0259218	0.140117	0.185001	0.853228	0.938105	NS
chr1	28286269	28286447	.	open_561	6.03287	0.605228	0.570727	1.06045	0.28894	0.601261	NS
chr1	28328685	28329249	.	open_562	63.2774	-0.05768	0.186296	-0.309614	0.756854	0.892486	NS
chr1	28369375	28370439	.	open_563	141.736	-0.0706494	0.139749	-0.505544	0.613177	0.814641	NS
chr1	28409589	28409900	.	open_564	9.03777	-0.38471	0.473184	-0.813024	0.416204	0.693448	NS
chr1	28437558	28438412	.	open_565	53.0477	0.236993	0.200938	1.17943	0.238225	0.556822	NS
chr1	28458281	28458642	.	open_566	9.08607	-1.13818	0.478157	-2.38035	0.0172961	0.172632	NS
chr1	28505546	28506587	.	open_567	208.531	0.0536215	0.133358	0.402087	0.68762	0.856579	NS
chr1	28516970	28518372	.	open_568	136.709	-0.189813	0.140053	-1.35529	0.175325	0.491273	NS
chr1	28552616	28553694	.	open_569	142.51	-0.0271579	0.145717	-0.186374	0.852152	0.937534	NS
chr1	28581208	28582254	.	open_570	234.003	0.0402286	0.124878	0.322143	0.747345	0.888117	NS
chr1	28623929	28624107	.	open_571	3.80449	0.961302	0.722106	1.33125	0.183108	0.500728	NS
chr1	28642435	28643450	.	open_572	115.198	-0.0600217	0.148355	-0.404583	0.685784	0.855555	NS
chr1	28648084	28649364	.	open_573	195.253	0.0394468	0.127004	0.310594	0.756109	0.892166	NS
chr1	28668309	28668862	.	open_574	57.4849	-0.0743638	0.193709	-0.383895	0.701056	0.864427	NS
chr1	28669265	28669899	.	open_575	33.1801	-0.0351308	0.254386	-0.1381	0.890161	0.95478	NS
chr1	28736460	28737379	.	open_576	148.409	-0.0888271	0.138171	-0.642879	0.520302	0.759654	NS
chr1	28755832	28756010	.	open_577	7.3779	0.0512355	0.534315	0.0958902	0.923608	0.970045	NS
chr1	28784994	28785488	.	open_578	15.1419	-0.349253	0.368772	-0.947071	0.343603	0.641513	NS
chr1	28856567	28856767	.	open_579	5.54496	-1.04486	0.638662	-1.63601	0.101838	0.397798	NS
chr1	28877235	28877489	.	open_580	19.9231	-0.545725	0.322914	-1.69	0.0910275	0.381006	NS
chr1	28882153	28882462	.	open_581	26.3749	-0.339635	0.282573	-1.20194	0.229388	0.548182	NS
chr1	28886790	28887338	.	open_582	35.3859	-0.273899	0.255155	-1.07346	0.283064	0.596294	NS
chr1	28914210	28914961	.	open_583	85.4868	0.0305744	0.190901	0.160158	0.872757	0.947481	NS
chr1	29124531	29125063	.	open_584	41.3347	0.344849	0.231834	1.48748	0.136888	0.44627	NS
chr1	29181279	29182527	.	open_585	196.585	0.078592	0.119086	0.659961	0.509279	0.752753	NS
chr1	29202915	29203336	.	open_586	18.3094	-0.302194	0.325145	-0.929412	0.352676	0.648522	NS
chr1	29230745	29231211	.	open_587	45.6684	0.0865819	0.227558	0.380483	0.703587	0.865736	NS
chr1	29236114	29236531	.	open_588	33.662	-0.261195	0.257038	-1.01617	0.309548	0.617634	NS
chr1	29570124	29570349	.	open_589	9.13255	2.18863	0.536536	4.07919	4.51937e-05	0.00378485	Gained
chr1	29974365	29974706	.	open_590	10.1429	0.999924	0.46944	2.13004	0.0331685	0.244228	NS
chr1	29974901	29975115	.	open_591	3.07284	0.567138	0.801846	0.707291	0.479386	0.734891	NS
chr1	30058968	30059143	.	open_592	4.15446	0.324584	0.743418	0.43661	0.662394	0.84331	NS
chr1	30380158	30380627	.	open_593	24.5571	-0.32034	0.288139	-1.11175	0.266245	0.581357	NS
chr1	30412402	30412673	.	open_594	9.83338	0.585484	0.458697	1.27641	0.201811	0.519728	NS
chr1	30513705	30513918	.	open_595	6.19768	-0.806778	0.581553	-1.38728	0.165356	0.478987	NS
chr1	30523106	30523350	.	open_596	7.35435	1.73956	0.559757	3.10771	0.00188545	0.044016	Gained
chr1	30527775	30528140	.	open_597	9.82806	0.852562	0.452676	1.88338	0.0596484	0.321219	NS
chr1	30718041	30719454	.	open_598	211.545	0.0187992	0.113076	0.166252	0.867959	0.945408	NS
chr1	30782427	30783140	.	open_599	30.8512	0.0284627	0.264717	0.107521	0.914375	0.966216	NS
chr1	30801899	30802165	.	open_600	10.8531	-0.33872	0.446623	-0.758402	0.44821	0.715144	NS
chr1	30911306	30911768	.	open_601	22.0209	-0.235999	0.302431	-0.78034	0.435191	0.706761	NS
chr1	30929153	30930008	.	open_602	25.9745	-0.339743	0.275584	-1.23281	0.217647	0.536581	NS
chr1	30967964	30968154	.	open_603	5.40261	-0.191234	0.581775	-0.328708	0.742377	0.88538	NS
chr1	31010245	31010859	.	open_604	21.0999	-0.439907	0.316588	-1.38952	0.164674	0.478033	NS
chr1	31047435	31047669	.	open_605	6.13021	0.523906	0.562782	0.930922	0.351894	0.648041	NS
chr1	31065167	31066112	.	open_606	173.781	-0.00260472	0.129229	-0.0201559	0.983919	0.993764	NS
chr1	31154682	31155663	.	open_607	117.684	-0.0291063	0.143063	-0.203452	0.838782	0.932017	NS
chr1	31170846	31171083	.	open_608	9.95556	1.67175	0.502639	3.32595	0.000881169	0.0264469	Gained
chr1	31181590	31181844	.	open_609	11.8392	-0.607585	0.420072	-1.44638	0.14807	0.459276	NS
chr1	31239082	31239341	.	open_610	12.1653	-0.189503	0.391861	-0.483597	0.628672	0.823082	NS
chr1	31296499	31297316	.	open_611	156.646	-0.00420667	0.144772	-0.0290572	0.976819	0.991385	NS
chr1	31394574	31395158	.	open_612	27.601	-0.212762	0.276363	-0.769865	0.44138	0.710762	NS
chr1	31421393	31421659	.	open_613	9.58031	-0.616162	0.481242	-1.28036	0.200419	0.5184	NS
chr1	31505968	31506241	.	open_614	7.4173	0.264999	0.518989	0.510606	0.609627	0.812818	NS
chr1	31548851	31549667	.	open_615	39.7285	-0.0927939	0.231789	-0.400338	0.688908	0.857393	NS
chr1	31564126	31564469	.	open_616	10.4879	-0.915492	0.459601	-1.99193	0.046379	0.285693	NS
chr1	31593957	31594153	.	open_617	8.97617	0.102637	0.455288	0.225433	0.821642	0.923912	NS
chr1	31644490	31645603	.	open_618	182.263	-0.112578	0.127315	-0.884253	0.376559	0.665211	NS
chr1	31715166	31715856	.	open_619	67.5746	-0.00163735	0.19056	-0.00859234	0.993144	0.997099	NS
chr1	31762554	31763087	.	open_620	39.6576	0.0315017	0.23437	0.13441	0.893078	0.956118	NS
chr1	31764428	31764799	.	open_621	27.7349	0.0986083	0.274019	0.359859	0.718952	0.873281	NS
chr1	31788470	31789502	.	open_622	95.2463	-0.00541549	0.173218	-0.0312641	0.975059	0.990753	NS
chr1	31932755	31933053	.	open_623	13.3261	0.277818	0.377647	0.735655	0.461941	0.72375	NS
chr1	31937560	31938001	.	open_624	41.9558	-0.0978	0.223938	-0.436729	0.662308	0.84331	NS
chr1	31938299	31938756	.	open_625	72.7507	-0.0780528	0.180104	-0.433376	0.664741	0.844405	NS
chr1	31964182	31964550	.	open_626	20.208	-0.442262	0.334913	-1.32053	0.186659	0.504066	NS
chr1	32003534	32003757	.	open_627	9.08469	-0.277572	0.45894	-0.604811	0.545305	0.774911	NS
chr1	32013306	32014606	.	open_628	209.437	0.0655281	0.113503	0.577326	0.563719	0.786251	NS
chr1	32072536	32073489	.	open_629	172.875	-0.00137119	0.137888	-0.00994423	0.992066	0.996774	NS
chr1	32107869	32108803	.	open_630	74.0101	0.197202	0.17757	1.11056	0.266757	0.581889	NS
chr1	32179319	32180610	.	open_631	114.492	0.151659	0.158309	0.957993	0.338066	0.637879	NS
chr1	32205452	32205709	.	open_632	25.2161	0.118324	0.28317	0.417855	0.676053	0.850482	NS
chr1	32215731	32216033	.	open_633	15.3813	0.0948769	0.354427	0.267691	0.788937	0.907953	NS
chr1	32222012	32222837	.	open_634	50.7214	0.130853	0.209547	0.624457	0.532327	0.767624	NS
chr1	32236261	32236526	.	open_635	9.84056	0.987103	0.457479	2.1577	0.0309511	0.235931	NS
chr1	32248156	32248529	.	open_636	15.0683	0.1374	0.395541	0.347373	0.728311	0.87802	NS
chr1	32291804	32292634	.	open_637	86.5592	0.09633	0.183968	0.523625	0.60054	0.808103	NS
chr1	32335277	32336353	.	open_638	209.33	0.156759	0.135302	1.15858	0.246626	0.564747	NS
chr1	32351188	32351820	.	open_639	92.1287	-0.29145	0.158549	-1.83823	0.0660279	0.33576	NS
chr1	32377606	32377816	.	open_640	4.13528	0.979924	0.693334	1.41335	0.157553	0.470271	NS
chr1	32394082	32395050	.	open_641	167.873	0.0599837	0.133581	0.449044	0.6534	0.838178	NS
chr1	32400920	32401212	.	open_642	17.1298	0.46254	0.348614	1.3268	0.184576	0.502038	NS
chr1	32448425	32449547	.	open_643	44.6433	-0.179514	0.217051	-0.827058	0.408204	0.687298	NS
chr1	32464721	32465540	.	open_644	91.0948	-0.162709	0.17755	-0.91641	0.359452	0.652841	NS
chr1	32500536	32501352	.	open_645	40.2965	0.0635223	0.225703	0.281442	0.778372	0.902878	NS
chr1	32520425	32520748	.	open_646	17.0754	-0.444494	0.351131	-1.26589	0.205552	0.523282	NS
chr1	32539135	32539511	.	open_647	24.4437	-0.0789891	0.284259	-0.277877	0.781107	0.904321	NS
chr1	32539906	32540303	.	open_648	21.4865	-0.304617	0.300642	-1.01322	0.310955	0.618751	NS
chr1	32612111	32612664	.	open_649	25.0446	0.264705	0.285239	0.928013	0.353401	0.648944	NS
chr1	32650371	32651682	.	open_650	225.445	-0.117366	0.114008	-1.02945	0.303268	0.612408	NS
chr1	32712259	32712480	.	open_651	15.1201	-0.164546	0.378602	-0.434614	0.663842	0.844273	NS
chr1	32753579	32753912	.	open_652	17.1122	0.0748434	0.349566	0.214104	0.830466	0.928305	NS
chr1	32773100	32773425	.	open_653	16.0592	0.0169944	0.353403	0.0480879	0.961646	0.985526	NS
chr1	32816976	32818281	.	open_654	207.998	0.142249	0.125043	1.1376	0.255288	0.572066	NS
chr1	32964079	32964323	.	open_655	24.3566	0.158056	0.297827	0.530697	0.595629	0.80492	NS
chr1	32964608	32965184	.	open_656	112.19	0.046845	0.149927	0.312453	0.754696	0.891531	NS
chr1	32992503	32992699	.	open_657	12.0689	0.959733	0.429439	2.23485	0.0254272	0.21329	NS
chr1	33007329	33007648	.	open_658	9.78703	0.404193	0.44359	0.911186	0.362197	0.654944	NS
chr1	33036520	33037193	.	open_659	135.071	0.0559984	0.149167	0.375406	0.707358	0.867772	NS
chr1	33055102	33055814	.	open_660	19.9714	-0.37347	0.311899	-1.19741	0.231147	0.549453	NS
chr1	33080807	33081553	.	open_661	81.4838	-0.18156	0.174982	-1.03759	0.299459	0.609463	NS
chr1	33099341	33099603	.	open_662	9.40142	0.750374	0.474535	1.58128	0.113813	0.415355	NS
chr1	33127051	33127541	.	open_663	43.3925	-0.17311	0.217895	-0.794465	0.426925	0.701046	NS
chr1	33146553	33146810	.	open_664	7.45918	-0.922794	0.519274	-1.77708	0.0755543	0.354273	NS
chr1	33180627	33182143	.	open_665	90.0705	-0.0264861	0.177553	-0.149173	0.881417	0.951017	NS
chr1	33217265	33217474	.	open_666	6.37732	-0.729603	0.583358	-1.25069	0.211046	0.529403	NS
chr1	33255534	33256031	.	open_667	29.4302	0.02203	0.263542	0.083592	0.933381	0.974025	NS
chr1	33298642	33298902	.	open_668	10.9674	-0.106306	0.426795	-0.24908	0.803299	0.915311	NS
chr1	33349307	33349602	.	open_669	26.6855	0.0873389	0.274102	0.318637	0.750002	0.889473	NS
chr1	33349873	33350431	.	open_670	60.9091	-0.0401782	0.192617	-0.208591	0.834768	0.930427	NS
chr1	33367688	33368181	.	open_671	17.1571	-0.393077	0.342217	-1.14862	0.250713	0.568364	NS
chr1	33430856	33431412	.	open_672	99.7068	-0.268967	0.163941	-1.64063	0.100874	0.396346	NS
chr1	33455934	33456252	.	open_673	13.9804	0.0810293	0.386519	0.209639	0.83395	0.930089	NS
chr1	33470607	33470905	.	open_674	26.688	-0.33995	0.27334	-1.24369	0.213615	0.53232	NS
chr1	33472316	33472808	.	open_675	98.738	-0.195206	0.155261	-1.25727	0.208655	0.526862	NS
chr1	33633166	33633456	.	open_676	18.7471	-0.243162	0.327069	-0.743457	0.457205	0.720966	NS
chr1	33985599	33986171	.	open_677	10.2094	1.94439	0.509606	3.81548	0.000135918	0.00779913	Gained
chr1	34163050	34163607	.	open_678	34.564	-0.219413	0.251457	-0.872565	0.3829	0.669691	NS
chr1	34199831	34200251	.	open_679	11.9527	1.57672	0.445633	3.53815	0.000402936	0.0161351	Gained
chr1	34228867	34229124	.	open_680	6.08237	-0.325418	0.555867	-0.585423	0.558263	0.783034	NS
chr1	34434692	34434877	.	open_681	5.83694	0.714697	0.596251	1.19865	0.230664	0.549103	NS
chr1	34597816	34598137	.	open_682	14.1929	0.207399	0.367454	0.56442	0.572468	0.791448	NS
chr1	34742656	34743141	.	open_683	24.0044	0.312375	0.294402	1.06105	0.288668	0.601107	NS
chr1	34763567	34763754	.	open_684	8.44835	1.81409	0.527382	3.43981	0.000582128	0.0204345	Gained
chr1	34786531	34786848	.	open_685	19.1624	0.371181	0.318783	1.16437	0.244276	0.562615	NS
chr1	34852738	34853308	.	open_686	44.8395	-0.244006	0.217012	-1.12439	0.260849	0.576857	NS
chr1	34859402	34860100	.	open_687	58.3522	-0.0111045	0.19755	-0.0562111	0.955174	0.98262	NS
chr1	34929667	34929880	.	open_688	11.8757	-0.68935	0.409544	-1.68321	0.0923337	0.383567	NS
chr1	34984931	34985676	.	open_689	33.2572	0.00471658	0.253713	0.0185902	0.985168	0.994122	NS
chr1	35031305	35032104	.	open_690	99.9203	-0.170536	0.160065	-1.06541	0.286689	0.59935	NS
chr1	35079139	35079677	.	open_691	43.5917	0.0243751	0.221206	0.110191	0.912258	0.965128	NS
chr1	35170267	35170469	.	open_692	7.57491	-0.768963	0.511307	-1.50392	0.132603	0.440487	NS
chr1	35180347	35180588	.	open_693	7.60891	0.424981	0.509065	0.834828	0.403815	0.684177	NS
chr1	35192208	35193580	.	open_694	325.854	-0.0107021	0.134819	-0.0793812	0.936729	0.975248	NS
chr1	35202039	35202391	.	open_695	20.3663	-0.234585	0.33511	-0.700024	0.483912	0.73778	NS
chr1	35268361	35269226	.	open_696	95.6934	0.0290137	0.154946	0.18725	0.851464	0.937176	NS
chr1	35441949	35442145	.	open_697	5.56499	0.43773	0.620034	0.705977	0.480203	0.735369	NS
chr1	35450918	35451347	.	open_698	20.0792	-0.090581	0.321542	-0.281708	0.778167	0.902794	NS
chr1	35505890	35506153	.	open_699	6.64438	1.19272	0.56364	2.11611	0.0343359	0.248409	NS
chr1	35557039	35558021	.	open_700	145.526	-0.0865619	0.151309	-0.572087	0.567263	0.788579	NS
chr1	35568825	35569160	.	open_701	19.1363	-0.346994	0.320549	-1.0825	0.279031	0.592423	NS
chr1	35641128	35642187	.	open_702	79.8623	-0.0215015	0.167372	-0.128465	0.897781	0.958191	NS
chr1	35718321	35719184	.	open_703	51.4711	-0.293454	0.199807	-1.46868	0.141919	0.45245	NS
chr1	35726806	35727287	.	open_704	15.1743	0.0823823	0.36994	0.222691	0.823776	0.924942	NS
chr1	35769337	35770224	.	open_705	139.987	-0.228534	0.138352	-1.65183	0.0985694	0.393243	NS
chr1	35807581	35808057	.	open_706	28.3735	0.0286953	0.263066	0.10908	0.913139	0.965629	NS
chr1	35808463	35809092	.	open_707	22.7701	0.0782296	0.291193	0.268653	0.788197	0.907568	NS
chr1	35882841	35883251	.	open_708	44.9556	-0.295906	0.228124	-1.29713	0.194586	0.512918	NS
chr1	35930427	35931676	.	open_709	115.877	0.089319	0.153776	0.58084	0.561348	0.784983	NS
chr1	36088601	36089330	.	open_710	87.8899	0.271746	0.167998	1.61755	0.105759	0.403272	NS
chr1	36099682	36099962	.	open_711	16.53	-0.128805	0.342837	-0.375703	0.707138	0.867586	NS
chr1	36134822	36135257	.	open_712	16.8214	0.0242565	0.349437	0.0694159	0.944659	0.978357	NS
chr1	36149277	36150034	.	open_713	212.631	-0.0514417	0.120699	-0.426197	0.669964	0.847029	NS
chr1	36150805	36151084	.	open_714	40.6877	0.248667	0.240264	1.03497	0.300682	0.610509	NS
chr1	36161219	36161637	.	open_715	20.7759	-0.0880149	0.323512	-0.272061	0.785575	0.90617	NS
chr1	36187259	36187498	.	open_716	8.18765	0.155368	0.500265	0.310571	0.756127	0.892166	NS
chr1	36187819	36188716	.	open_717	43.4508	-0.193286	0.220191	-0.877812	0.380046	0.667684	NS
chr1	36223888	36225050	.	open_718	281.667	-0.0134506	0.128097	-0.105004	0.916373	0.967064	NS
chr1	36285547	36285820	.	open_719	11.3625	-0.533416	0.439666	-1.21323	0.225042	0.544235	NS
chr1	36300055	36300328	.	open_720	9.16724	0.813324	0.489065	1.66302	0.0963089	0.39004	NS
chr1	36306790	36307232	.	open_721	26.429	-0.0395213	0.277103	-0.142623	0.886588	0.953229	NS
chr1	36369205	36369394	.	open_722	11.6588	-0.330889	0.410391	-0.806278	0.420083	0.696075	NS
chr1	36385175	36387090	.	open_723	227.551	0.130868	0.119807	1.09232	0.274691	0.588827	NS
chr1	36397264	36398118	.	open_724	74.4989	0.0463237	0.185031	0.250356	0.802312	0.914756	NS
chr1	36420934	36421251	.	open_725	15.8586	-0.335065	0.369027	-0.907968	0.363895	0.65614	NS
chr1	36450231	36450933	.	open_726	89.0282	0.063798	0.163148	0.391045	0.695764	0.861362	NS
chr1	36463898	36464737	.	open_727	72.8112	0.0447303	0.188476	0.237326	0.812404	0.91979	NS
chr1	36543204	36543409	.	open_728	6.62733	0.757644	0.55926	1.35473	0.175505	0.491453	NS
chr1	36553999	36554388	.	open_729	11.3117	-0.0674451	0.407789	-0.165392	0.868635	0.945676	NS
chr1	36576129	36576317	.	open_730	11.75	-0.221434	0.41175	-0.537786	0.590724	0.80216	NS
chr1	36703870	36704085	.	open_731	12.0213	-0.0377238	0.420105	-0.0897961	0.928449	0.971792	NS
chr1	37049594	37049781	.	open_732	5.70376	-0.251968	0.606202	-0.41565	0.677666	0.851261	NS
chr1	37400046	37400359	.	open_733	9.03511	-0.200859	0.459235	-0.437378	0.661837	0.843049	NS
chr1	37474161	37474797	.	open_734	65.2909	-0.00456715	0.197402	-0.0231364	0.981542	0.992984	NS
chr1	37487584	37487858	.	open_735	9.43878	0.401693	0.465408	0.863099	0.388083	0.673313	NS
chr1	37499250	37499458	.	open_736	7.8014	1.60106	0.567074	2.82337	0.00475219	0.0789121	Gained
chr1	37514225	37515196	.	open_737	61.8056	-0.114399	0.191726	-0.596679	0.550722	0.778015	NS
chr1	37553960	37554460	.	open_738	28.1716	0.133145	0.281885	0.472337	0.636686	0.828093	NS
chr1	37595514	37596407	.	open_739	81.9552	-0.107292	0.165678	-0.647594	0.517247	0.757584	NS
chr1	37603113	37603310	.	open_740	8.70022	-0.967644	0.477748	-2.02543	0.0428233	0.274921	NS
chr1	37690461	37691018	.	open_741	114.744	-0.0735919	0.147398	-0.499272	0.617587	0.817381	NS
chr1	37692006	37692850	.	open_742	180.782	0.16133	0.128135	1.25906	0.208008	0.526003	NS
chr1	37752560	37752903	.	open_743	24.6769	0.404857	0.311327	1.30042	0.193456	0.511628	NS
chr1	37766150	37766443	.	open_744	11.0945	0.341408	0.419785	0.813291	0.416051	0.693322	NS
chr1	37807622	37807902	.	open_745	41.3205	0.0757047	0.24106	0.314049	0.753484	0.891074	NS
chr1	37808094	37808975	.	open_746	121.862	0.0636739	0.151465	0.420386	0.674204	0.84951	NS
chr1	37859059	37860336	.	open_747	128.067	-0.0482482	0.140639	-0.343064	0.73155	0.879611	NS
chr1	37865654	37865868	.	open_748	4.84118	0.902012	0.635544	1.41928	0.155818	0.468089	NS
chr1	37931509	37932130	.	open_749	72.1646	-0.0676543	0.178875	-0.378222	0.705266	0.866688	NS
chr1	37946846	37947330	.	open_750	32.4733	0.0342524	0.257656	0.132939	0.894242	0.95649	NS
chr1	37989435	37990405	.	open_751	96.6421	-0.0510709	0.153765	-0.332136	0.739787	0.883953	NS
chr1	38012348	38013070	.	open_752	159.713	0.044935	0.139649	0.321771	0.747626	0.888274	NS
chr1	38046849	38047111	.	open_753	41.0308	-0.208791	0.250795	-0.832516	0.405118	0.685088	NS
chr1	38084575	38084784	.	open_754	6.12652	0.100832	0.562961	0.179111	0.857851	0.940486	NS
chr1	38138639	38138944	.	open_755	14.122	1.3003	0.444121	2.92781	0.00341355	0.0639674	Gained
chr1	38363010	38363214	.	open_756	6.31246	-0.884618	0.563425	-1.57007	0.116399	0.418401	NS
chr1	38587156	38587443	.	open_757	12.1065	-0.755508	0.405548	-1.86293	0.0624716	0.327954	NS
chr1	38589091	38589426	.	open_758	8.25496	1.18818	0.530783	2.23854	0.0251858	0.212509	NS
chr1	38835201	38836033	.	open_759	22.6705	-0.247222	0.295758	-0.835894	0.403214	0.683632	NS
chr1	38859147	38860407	.	open_760	179.366	0.0918818	0.132753	0.692126	0.488858	0.74097	NS
chr1	38872710	38873839	.	open_761	149.257	-0.0777307	0.136092	-0.571163	0.567889	0.788827	NS
chr1	38990835	38991486	.	open_762	102.787	-0.175609	0.157007	-1.11848	0.263361	0.578901	NS
chr1	38991684	38991911	.	open_763	14.1713	-0.382047	0.374053	-1.02137	0.307079	0.615798	NS
chr1	39025896	39026987	.	open_764	56.8532	-0.061409	0.20141	-0.304896	0.760445	0.894452	NS
chr1	39092277	39092489	.	open_765	6.14278	-1.3041	0.588792	-2.21487	0.0267692	0.218228	NS
chr1	39132938	39133274	.	open_766	19.6687	-0.118962	0.332278	-0.358019	0.720329	0.87401	NS
chr1	39142550	39142923	.	open_767	13.9316	-0.0694673	0.385977	-0.179978	0.85717	0.940145	NS
chr1	39158740	39158918	.	open_768	8.31268	0.278537	0.497703	0.559645	0.575721	0.793313	NS
chr1	39159222	39159795	.	open_769	22.3584	-0.178268	0.319361	-0.558203	0.576706	0.794026	NS
chr1	39164962	39165350	.	open_770	13.4847	-0.254805	0.386852	-0.658661	0.510113	0.753054	NS
chr1	39178256	39179583	.	open_771	47.3596	-0.0610862	0.238132	-0.256522	0.797548	0.91243	NS
chr1	39191548	39192693	.	open_772	41.1035	0.109212	0.237979	0.458916	0.646294	0.834251	NS
chr1	39204268	39205174	.	open_773	25.0951	-0.0440121	0.286971	-0.153368	0.878108	0.949743	NS
chr1	39205534	39205896	.	open_774	10.7688	0.229542	0.447594	0.512836	0.608066	0.811901	NS
chr1	39213976	39215298	.	open_775	40.8178	0.0438711	0.231925	0.18916	0.849967	0.936519	NS
chr1	39230662	39231148	.	open_776	12.4478	0.25309	0.389504	0.649774	0.515838	0.75686	NS
chr1	39258711	39259012	.	open_777	15.6541	-0.0175474	0.372527	-0.0471036	0.962431	0.985702	NS
chr1	39271928	39272173	.	open_778	7.9664	0.739036	0.493506	1.49752	0.134258	0.442956	NS
chr1	39398518	39399068	.	open_779	24.8915	0.00620692	0.281712	0.0220329	0.982422	0.993263	NS
chr1	39408367	39409252	.	open_780	174.128	-0.15816	0.13006	-1.21606	0.223962	0.543122	NS
chr1	39466373	39466608	.	open_781	6.6357	0.731279	0.546443	1.33825	0.180814	0.498308	NS
chr1	39491370	39491774	.	open_782	27.4226	-0.0508707	0.281325	-0.180825	0.856505	0.939826	NS
chr1	39539020	39539553	.	open_783	19.9	-0.202375	0.325285	-0.622147	0.533845	0.768671	NS
chr1	39559079	39560141	.	open_784	60.3045	-0.179666	0.189381	-0.9487	0.342773	0.64098	NS
chr1	39576550	39577003	.	open_785	71.8837	0.14167	0.184791	0.766649	0.44329	0.712218	NS
chr1	39605940	39606524	.	open_786	20.1126	-0.045904	0.319143	-0.143835	0.885631	0.952676	NS
chr1	39639439	39640143	.	open_787	58.6957	-0.226408	0.209157	-1.08248	0.27904	0.592423	NS
chr1	39653680	39654121	.	open_788	13.3026	-0.611587	0.395665	-1.54572	0.122172	0.426304	NS
chr1	39661996	39662235	.	open_789	6.71385	0.577617	0.558397	1.03442	0.30094	0.610597	NS
chr1	39679694	39679877	.	open_790	5.66593	-0.983373	0.587769	-1.67306	0.0943154	0.386822	NS
chr1	39720176	39720380	.	open_791	9.53224	-0.659162	0.455536	-1.447	0.147896	0.459148	NS
chr1	39738687	39739283	.	open_792	51.8697	-0.0820334	0.209984	-0.390664	0.696045	0.86156	NS
chr1	39788727	39789224	.	open_793	36.6321	-0.447245	0.265426	-1.68501	0.0919862	0.382839	NS
chr1	39799800	39800034	.	open_794	9.99627	-0.00865872	0.448555	-0.0193036	0.984599	0.993916	NS
chr1	39816224	39817027	.	open_795	19.9407	0.27996	0.332898	0.840978	0.40036	0.68207	NS
chr1	39830036	39830330	.	open_796	7.02159	0.691337	0.549346	1.25847	0.208221	0.526279	NS
chr1	39882922	39883673	.	open_797	51.8366	-0.19521	0.205821	-0.948445	0.342903	0.640992	NS
chr1	39901428	39902501	.	open_798	157.485	0.0972195	0.133264	0.729524	0.465681	0.725954	NS
chr1	39919645	39919892	.	open_799	13.7104	-0.0578792	0.387798	-0.149251	0.881356	0.951005	NS
chr1	39954916	39955361	.	open_800	25.0232	-0.0576425	0.298208	-0.193296	0.846727	0.935326	NS
chr1	39982030	39982228	.	open_801	6.31819	0.810691	0.576028	1.40738	0.159315	0.472074	NS
chr1	40032465	40032714	.	open_802	10.0696	-0.204247	0.468088	-0.436344	0.662587	0.843487	NS
chr1	40039798	40040987	.	open_803	175.958	-0.0201928	0.143643	-0.140577	0.888204	0.953782	NS
chr1	40084832	40085088	.	open_804	14.6441	-0.244306	0.360024	-0.678581	0.497403	0.745985	NS
chr1	40096850	40097764	.	open_805	49.1783	-0.0198475	0.205291	-0.0966799	0.922981	0.969656	NS
chr1	40143855	40144385	.	open_806	17.2031	-1.0246	0.35821	-2.86034	0.00423185	0.073305	Lost
chr1	40161079	40161926	.	open_807	90.4521	0.0324039	0.160625	0.201737	0.840123	0.932542	NS
chr1	40182929	40183196	.	open_808	8.66178	0.0435027	0.480358	0.0905631	0.92784	0.971644	NS
chr1	40244744	40245215	.	open_809	9.14562	-1.32009	0.487861	-2.70588	0.00681235	0.0986666	Lost
chr1	40257504	40258529	.	open_810	152.826	0.0349569	0.156801	0.222937	0.823584	0.924891	NS
chr1	40338816	40339049	.	open_811	9.87101	-0.981037	0.456633	-2.14841	0.0316809	0.238972	NS
chr1	40373326	40374893	.	open_812	111.582	-0.00894032	0.147311	-0.0606901	0.951606	0.981196	NS
chr1	40383832	40384091	.	open_813	5.93893	0.325633	0.578079	0.563302	0.573229	0.791788	NS
chr1	40404859	40405063	.	open_814	8.07701	0.14864	0.50433	0.294728	0.768202	0.897999	NS
chr1	40438615	40438878	.	open_815	10.6524	-0.798901	0.452392	-1.76595	0.0774044	0.357571	NS
chr1	40449803	40450632	.	open_816	99.9214	-0.162832	0.169934	-0.958207	0.337958	0.637855	NS
chr1	40450788	40451056	.	open_817	13.718	0.248876	0.379241	0.656248	0.511665	0.754153	NS
chr1	40477096	40477724	.	open_818	27.7183	-0.693782	0.277725	-2.49809	0.0124864	0.143335	NS
chr1	40508425	40509180	.	open_819	37.1813	0.204608	0.249873	0.818846	0.412874	0.691174	NS
chr1	40531310	40532105	.	open_820	89.1673	0.0211648	0.164024	0.129034	0.897331	0.957944	NS
chr1	40612100	40612687	.	open_821	15.6869	-0.297573	0.347667	-0.855913	0.392046	0.676513	NS
chr1	40665673	40666034	.	open_822	23.8498	-0.0987974	0.293588	-0.336517	0.736481	0.882324	NS
chr1	40691151	40692451	.	open_823	168.095	-0.061185	0.129391	-0.472869	0.636306	0.827892	NS
chr1	40708783	40709780	.	open_824	73.562	-0.0859957	0.192359	-0.447058	0.654833	0.839044	NS
chr1	40774325	40774726	.	open_825	13.3865	0.161951	0.38548	0.420127	0.674393	0.849552	NS
chr1	40848532	40848768	.	open_826	13.2014	-0.580704	0.418027	-1.38916	0.164786	0.478156	NS
chr1	40862302	40862780	.	open_827	33.3422	-0.237989	0.247119	-0.963056	0.335519	0.63603	NS
chr1	40873338	40873547	.	open_828	6.95091	1.13772	0.5378	2.11551	0.0343866	0.248551	NS
chr1	40898577	40898895	.	open_829	6.58332	1.26195	0.559658	2.25487	0.0241417	0.20788	NS
chr1	40952566	40952821	.	open_830	12.3546	0.62518	0.405393	1.54216	0.123036	0.427113	NS
chr1	40967425	40967923	.	open_831	10.6058	1.45607	0.451929	3.2219	0.00127345	0.0337643	Gained
chr1	40979247	40980059	.	open_832	132.099	-0.0667662	0.13622	-0.490134	0.624039	0.820741	NS
chr1	41003752	41004116	.	open_833	12.0093	0.779476	0.41664	1.87086	0.0613641	0.32549	NS
chr1	41109502	41110087	.	open_834	10.1218	1.06795	0.457258	2.33556	0.0195143	0.184647	NS
chr1	41241323	41241533	.	open_835	13.5092	-0.470392	0.391428	-1.20173	0.229466	0.548231	NS
chr1	41328707	41328959	.	open_836	6.67065	-0.847496	0.536622	-1.57932	0.114263	0.416022	NS
chr1	41360657	41361362	.	open_837	109.854	-0.00971613	0.146853	-0.0661621	0.947249	0.979349	NS
chr1	41432706	41433139	.	open_838	20.5081	0.605418	0.315917	1.91638	0.0553165	0.311183	NS
chr1	41474816	41475193	.	open_839	9.54952	0.420356	0.47042	0.893575	0.371549	0.661406	NS
chr1	41475462	41475698	.	open_840	4.92969	-0.881105	0.675674	-1.30404	0.19222	0.510082	NS
chr1	41761271	41761447	.	open_841	6.67321	-0.551186	0.54086	-1.01909	0.30816	0.616557	NS
chr1	41772995	41773383	.	open_842	9.95046	1.10808	0.460081	2.40844	0.0160207	0.165123	NS
chr1	41955632	41955874	.	open_843	7.79691	1.73837	0.591597	2.93843	0.00329875	0.0626642	Gained
chr1	42021346	42021530	.	open_844	5.86843	0.675335	0.596437	1.13228	0.257516	0.574259	NS
chr1	42035247	42036257	.	open_845	122.896	0.0343604	0.14047	0.244611	0.806758	0.916937	NS
chr1	42133749	42133962	.	open_846	6.19089	-1.00837	0.599741	-1.68134	0.0926962	0.383998	NS
chr1	42334659	42335739	.	open_847	127.585	-0.0438066	0.139867	-0.313202	0.754127	0.891376	NS
chr1	42371082	42371359	.	open_848	7.94924	0.929411	0.502357	1.8501	0.0642991	0.331734	NS
chr1	42380356	42381215	.	open_849	54.5062	-0.1747	0.201169	-0.868425	0.385162	0.671284	NS
chr1	42456086	42456964	.	open_850	51.6832	-0.0457291	0.205628	-0.222388	0.824012	0.925046	NS
chr1	42462786	42463530	.	open_851	103.394	-0.0175532	0.158373	-0.110834	0.911748	0.965	NS
chr1	42473398	42473585	.	open_852	5.55568	-0.968651	0.657114	-1.4741	0.140455	0.450554	NS
chr1	42529978	42530186	.	open_853	6.77059	1.47115	0.572544	2.56949	0.0101847	0.127121	NS
chr1	42658062	42658997	.	open_854	78.591	-0.105137	0.170623	-0.616197	0.537764	0.770907	NS
chr1	42681937	42682798	.	open_855	178.303	0.0592962	0.132041	0.449073	0.653379	0.838178	NS
chr1	42766583	42767682	.	open_856	220.034	0.0142488	0.13436	0.106049	0.915543	0.966669	NS
chr1	42816765	42817694	.	open_857	120.868	-0.139785	0.143645	-0.973127	0.33049	0.632749	NS
chr1	42846178	42846777	.	open_858	85.7634	-0.0164744	0.175887	-0.0936644	0.925376	0.970679	NS
chr1	42924036	42924762	.	open_859	89.2776	-0.167123	0.162896	-1.02595	0.304913	0.613994	NS
chr1	42941189	42941475	.	open_860	10.8509	1.89118	0.486789	3.885	0.000102329	0.00645334	Gained
chr1	42958008	42958387	.	open_861	37.8006	0.0192566	0.234501	0.0821176	0.934553	0.974433	NS
chr1	42958668	42959196	.	open_862	58.6449	-0.0242561	0.212194	-0.114311	0.908992	0.963828	NS
chr1	43021764	43022036	.	open_863	6.83959	1.20741	0.559966	2.15621	0.031067	0.236379	NS
chr1	43073686	43073884	.	open_864	13.2938	-0.289902	0.391725	-0.740065	0.45926	0.722488	NS
chr1	43135194	43135455	.	open_865	7.2178	0.540716	0.529699	1.0208	0.30735	0.615926	NS
chr1	43143615	43143935	.	open_866	9.83774	-0.895093	0.457418	-1.95684	0.0503667	0.296789	NS
chr1	43171864	43172792	.	open_867	81.8409	0.0256148	0.171533	0.149329	0.881294	0.951005	NS
chr1	43227347	43227534	.	open_868	13.5885	-0.641521	0.387204	-1.6568	0.0975594	0.39162	NS
chr1	43358421	43359497	.	open_869	134.407	0.0137093	0.13954	0.0982467	0.921736	0.969032	NS
chr1	43367740	43368544	.	open_870	94.0193	-0.0277295	0.164115	-0.168964	0.865825	0.944266	NS
chr1	43389488	43390168	.	open_871	69.0358	0.0459435	0.183742	0.250044	0.802553	0.914849	NS
chr1	43582282	43582519	.	open_872	8.46471	1.71672	0.553738	3.10023	0.0019337	0.0448734	Gained
chr1	43597154	43597334	.	open_873	6.70622	-0.595729	0.539377	-1.10448	0.269386	0.584026	NS
chr1	43649513	43650847	.	open_874	344.636	-0.037852	0.109535	-0.345571	0.729665	0.878732	NS
chr1	43707099	43707865	.	open_875	114.894	-0.105187	0.168526	-0.624155	0.532526	0.767732	NS
chr1	43763383	43763754	.	open_876	19.4077	-0.328784	0.328962	-0.999457	0.317573	0.623664	NS
chr1	43946299	43947085	.	open_877	112.506	0.0670685	0.154838	0.433154	0.664903	0.8445	NS
chr1	43969700	43970193	.	open_878	94.2197	-0.0908377	0.165798	-0.547881	0.583773	0.798297	NS
chr1	43974504	43975114	.	open_879	91.1711	0.0535908	0.177876	0.301281	0.7632	0.895461	NS
chr1	43991294	43992191	.	open_880	65.1821	0.136672	0.190885	0.715995	0.473995	0.731129	NS
chr1	44005665	44006063	.	open_881	17.8246	-0.0899545	0.351674	-0.255789	0.798113	0.912657	NS
chr1	44029723	44030898	.	open_882	126.056	-0.0605984	0.139982	-0.432901	0.665087	0.844503	NS
chr1	44036601	44036809	.	open_883	14.109	-0.186802	0.375517	-0.497453	0.61887	0.817898	NS
chr1	44047789	44047979	.	open_884	13.2902	-0.984708	0.40241	-2.44703	0.0144039	0.155112	NS
chr1	44103482	44103714	.	open_885	12.957	-0.306002	0.384232	-0.796398	0.425801	0.700154	NS
chr1	44213254	44213860	.	open_886	38.6431	0.0158133	0.233462	0.0677341	0.945997	0.978814	NS
chr1	44327735	44328243	.	open_887	18.3577	1.2574	0.358875	3.50373	0.000458789	0.0175699	Gained
chr1	44355189	44355661	.	open_888	66.094	0.13175	0.194066	0.67889	0.497208	0.745797	NS
chr1	44405062	44405583	.	open_889	23.9364	-0.244262	0.293363	-0.832626	0.405056	0.685076	NS
chr1	44532163	44532340	.	open_890	7.27165	1.06806	0.524171	2.03762	0.0415876	0.271181	NS
chr1	44595070	44595475	.	open_891	16.9788	-0.532497	0.366727	-1.45203	0.146494	0.457553	NS
chr1	44631708	44632515	.	open_892	75.3143	0.216282	0.177553	1.21813	0.223176	0.542172	NS
chr1	44673960	44674901	.	open_893	233.813	-0.0673949	0.110485	-0.609991	0.541868	0.773097	NS
chr1	44707186	44708313	.	open_894	25.7694	0.758659	0.285799	2.65452	0.00794208	0.108999	NS
chr1	44715017	44715350	.	open_895	15.3059	-0.0165658	0.354691	-0.0467048	0.962749	0.985795	NS
chr1	44721444	44722133	.	open_896	42.7945	-0.271272	0.232608	-1.16622	0.243526	0.561883	NS
chr1	44730525	44731511	.	open_897	131.058	-0.110594	0.149537	-0.739578	0.459556	0.722572	NS
chr1	44739446	44740221	.	open_898	89.293	0.0909982	0.157482	0.577831	0.563378	0.786022	NS
chr1	44775080	44775918	.	open_899	89.878	0.0212787	0.178178	0.119424	0.904939	0.961907	NS
chr1	44786261	44786442	.	open_900	13.4276	-0.0426423	0.378003	-0.112809	0.910182	0.964434	NS
chr1	44793284	44793966	.	open_901	26.5797	0.198222	0.275066	0.720633	0.471135	0.729274	NS
chr1	44799732	44800924	.	open_902	337.882	0.168835	0.218729	0.771889	0.44018	0.709986	NS
chr1	44807321	44807545	.	open_903	16.1729	1.16953	0.377841	3.09528	0.00196627	0.0453756	Gained
chr1	44819345	44820557	.	open_904	62.0198	-0.229031	0.193384	-1.18433	0.236281	0.55504	NS
chr1	44986297	44986829	.	open_905	73.6174	0.205105	0.176097	1.16473	0.24413	0.562524	NS
chr1	45011299	45012572	.	open_906	131.328	0.0836659	0.13779	0.607199	0.543719	0.774079	NS
chr1	45190238	45190442	.	open_907	6.34371	-0.435442	0.55725	-0.781411	0.434561	0.706459	NS
chr1	45205373	45205819	.	open_908	20.0986	-0.618982	0.316283	-1.95705	0.0503415	0.296697	NS
chr1	45205966	45207078	.	open_909	80.8023	0.0241488	0.165517	0.145899	0.884001	0.951893	NS
chr1	45303494	45304309	.	open_910	162.132	0.0248017	0.136708	0.18142	0.856038	0.939512	NS
chr1	45320186	45320380	.	open_911	4.48235	-0.793215	0.686853	-1.15485	0.24815	0.566157	NS
chr1	45339741	45340665	.	open_912	108.054	-0.0297572	0.179595	-0.16569	0.868401	0.945536	NS
chr1	45499677	45500605	.	open_913	167.865	0.027837	0.152034	0.183097	0.854722	0.938838	NS
chr1	45508438	45508697	.	open_914	12.8628	0.382885	0.402908	0.950303	0.341958	0.64051	NS
chr1	45521243	45522262	.	open_915	240.833	0.162457	0.133341	1.21836	0.223089	0.542143	NS
chr1	45537347	45537528	.	open_916	5.7828	0.771594	0.57563	1.34043	0.180104	0.497272	NS
chr1	45550475	45551451	.	open_917	92.0596	-0.00279669	0.156559	-0.0178635	0.985748	0.994286	NS
chr1	45583341	45585071	.	open_918	330.218	0.0389156	0.10952	0.35533	0.722342	0.874917	NS
chr1	45643996	45644214	.	open_919	7.20355	0.179565	0.534407	0.336009	0.736864	0.882401	NS
chr1	45686123	45687672	.	open_920	345.166	0.01077	0.108155	0.0995798	0.920678	0.968743	NS
chr1	45688030	45688382	.	open_921	41.2983	0.226156	0.227876	0.99245	0.320978	0.626276	NS
chr1	45750250	45751056	.	open_922	105.172	0.044478	0.160081	0.277847	0.78113	0.904321	NS
chr1	45802851	45803780	.	open_923	68.6316	0.214746	0.178658	1.202	0.229363	0.548182	NS
chr1	45881732	45881970	.	open_924	11.6002	0.0661894	0.402142	0.164592	0.869265	0.945836	NS
chr1	46036956	46037699	.	open_925	22.8601	0.13414	0.296815	0.451932	0.651318	0.837146	NS
chr1	46123665	46123960	.	open_926	6.14319	0.358182	0.558416	0.641425	0.521247	0.760128	NS
chr1	46131904	46133435	.	open_927	435.229	0.0037673	0.120022	0.0313883	0.97496	0.990688	NS
chr1	46179555	46180098	.	open_928	23.0604	-0.284868	0.289355	-0.984492	0.324874	0.628962	NS
chr1	46198238	46198433	.	open_929	14.2332	-0.00873518	0.365352	-0.0239089	0.980925	0.992828	NS
chr1	46223609	46223884	.	open_930	15.6851	0.206398	0.356289	0.5793	0.562387	0.78566	NS
chr1	46247057	46247922	.	open_931	159.445	0.111486	0.134364	0.82973	0.406691	0.68611	NS
chr1	46302668	46303907	.	open_932	183.302	0.109237	0.134816	0.810266	0.417787	0.694432	NS
chr1	46333676	46333909	.	open_933	9.03727	0.229659	0.463502	0.495487	0.620257	0.81867	NS
chr1	46340263	46341234	.	open_934	92.1291	0.182284	0.160202	1.13784	0.255188	0.57201	NS
chr1	46347925	46348482	.	open_935	29.8061	-0.178341	0.266495	-0.66921	0.503362	0.749419	NS
chr1	46413474	46413806	.	open_936	9.70887	0.4284	0.45591	0.939658	0.347393	0.644399	NS
chr1	46442325	46443226	.	open_937	79.0666	-0.263762	0.179553	-1.46899	0.141836	0.452343	NS
chr1	46528032	46528616	.	open_938	23.5403	-0.524979	0.305427	-1.71884	0.0856441	0.371791	NS
chr1	46603882	46604528	.	open_939	82.6696	0.0160462	0.16797	0.09553	0.923894	0.970091	NS
chr1	46667795	46668740	.	open_940	79.3153	0.026427	0.182182	0.145058	0.884665	0.952163	NS
chr1	46718942	46719460	.	open_941	86.5021	-0.127601	0.168996	-0.755056	0.450215	0.7168	NS
chr1	46725198	46725484	.	open_942	16.3208	-0.448774	0.34555	-1.29873	0.194038	0.512294	NS
chr1	46757268	46757989	.	open_943	20.4913	1.33383	0.364964	3.65468	0.000257504	0.0120094	Gained
chr1	46991801	46991992	.	open_944	4.68502	-0.20152	0.706619	-0.285188	0.7755	0.901059	NS
chr1	47175264	47175596	.	open_945	20.8061	-0.435679	0.306396	-1.42195	0.155042	0.467219	NS
chr1	47179188	47179644	.	open_946	35.6256	0.0989154	0.236696	0.4179	0.67602	0.850482	NS
chr1	47193029	47193285	.	open_947	13.6834	0.145245	0.401972	0.36133	0.717853	0.872587	NS
chr1	47243450	47243735	.	open_948	6.64693	-0.49924	0.540337	-0.923941	0.355517	0.650292	NS
chr1	47263066	47263268	.	open_949	5.4412	-0.813432	0.615741	-1.32106	0.186481	0.50386	NS
chr1	47280253	47280689	.	open_950	9.01728	-0.413292	0.459518	-0.899402	0.368438	0.659011	NS
chr1	47313590	47314672	.	open_951	230.084	-0.137069	0.117272	-1.16881	0.242479	0.561036	NS
chr1	47333546	47334928	.	open_952	153.499	0.169241	0.129702	1.30484	0.191946	0.509762	NS
chr1	47388165	47389194	.	open_953	30.9225	0.120267	0.264896	0.454017	0.649817	0.836142	NS
chr1	47409497	47409699	.	open_954	7.70317	0.964205	0.521989	1.84717	0.064722	0.332729	NS
chr1	47425161	47425377	.	open_955	6.99936	0.207513	0.537995	0.385716	0.699707	0.863639	NS
chr1	47432522	47432704	.	open_956	18.2101	-0.141382	0.332237	-0.425546	0.670438	0.847307	NS
chr1	47436551	47436838	.	open_957	40.0451	-0.169845	0.233287	-0.728054	0.46658	0.726415	NS
chr1	47437414	47438221	.	open_958	146.436	-0.00989707	0.133608	-0.0740757	0.94095	0.976901	NS
chr1	47458887	47459193	.	open_959	8.20186	0.128644	0.475909	0.270312	0.78692	0.906869	NS
chr1	47569843	47570099	.	open_960	12.9434	1.19538	0.405267	2.94962	0.00318165	0.0613754	Gained
chr1	47589528	47589729	.	open_961	5.64345	-1.02535	0.634647	-1.61562	0.106176	0.403977	NS
chr1	47685292	47685473	.	open_962	7.59024	-0.670346	0.521573	-1.28524	0.198709	0.516741	NS
chr1	47697051	47697305	.	open_963	8.63137	1.40261	0.532002	2.63647	0.00837728	0.113029	NS
chr1	47710466	47710802	.	open_964	15.2746	-0.325602	0.360914	-0.902161	0.366972	0.658215	NS
chr1	47726240	47726670	.	open_965	22.3838	-0.461857	0.299009	-1.54462	0.122437	0.426304	NS
chr1	47871839	47872216	.	open_966	10.3304	0.830683	0.448792	1.85093	0.0641796	0.331466	NS
chr1	47894759	47895096	.	open_967	12.5088	1.82204	0.471308	3.86593	0.000110668	0.00681372	Gained
chr1	47941613	47941819	.	open_968	6.82402	0.852114	0.546344	1.55967	0.118839	0.421963	NS
chr1	47997508	47997894	.	open_969	32.4164	-0.262915	0.250164	-1.05097	0.293272	0.604873	NS
chr1	48026373	48026648	.	open_970	6.80414	1.50023	0.575823	2.60536	0.00917781	0.119509	NS
chr1	48052512	48052857	.	open_971	9.2885	1.92451	0.547703	3.51379	0.000441767	0.0173008	Gained
chr1	48093788	48094327	.	open_972	25.9831	-0.021501	0.285878	-0.0752102	0.940048	0.976517	NS
chr1	48109213	48109859	.	open_973	20.6736	-0.0612134	0.311973	-0.196214	0.844443	0.934291	NS
chr1	48114915	48115330	.	open_974	9.84614	0.24691	0.458532	0.538479	0.590246	0.801907	NS
chr1	48216111	48216304	.	open_975	4.21266	-1.9022	0.757137	-2.51236	0.0119927	0.140251	NS
chr1	48223317	48223501	.	open_976	5.97692	1.89782	0.634125	2.99281	0.00276418	0.0564135	Gained
chr1	48236863	48237241	.	open_977	14.6889	-1.00269	0.40352	-2.48487	0.0129599	0.146242	NS
chr1	48246862	48247036	.	open_978	4.69777	1.34475	0.668081	2.01286	0.0441295	0.278859	NS
chr1	48471706	48472642	.	open_979	155.154	-0.0594023	0.131424	-0.451991	0.651276	0.837144	NS
chr1	48494292	48494679	.	open_980	13.5121	1.51312	0.410365	3.68725	0.000226687	0.0110779	Gained
chr1	48498221	48498734	.	open_981	26.6706	-0.301044	0.276113	-1.09029	0.275584	0.589666	NS
chr1	48507277	48507481	.	open_982	4.34637	-1.31681	0.721491	-1.82513	0.0679818	0.339815	NS
chr1	48523622	48523852	.	open_983	8.00877	0.716263	0.497497	1.43973	0.149943	0.461296	NS
chr1	48530844	48531193	.	open_984	16.8673	-0.390834	0.348332	-1.12201	0.261857	0.577304	NS
chr1	48570066	48570297	.	open_985	7.73381	0.556924	0.500631	1.11244	0.265947	0.581178	NS
chr1	48572770	48573086	.	open_986	18.9851	-0.965945	0.330629	-2.92153	0.00348314	0.064765	Lost
chr1	48677256	48677705	.	open_987	20.2105	-0.461661	0.320413	-1.44083	0.149633	0.460936	NS
chr1	48688323	48688628	.	open_988	13.266	-0.304732	0.384199	-0.793163	0.427683	0.701819	NS
chr1	48697100	48697353	.	open_989	9.73028	-0.666117	0.460145	-1.44762	0.147723	0.458886	NS
chr1	48766829	48767014	.	open_990	5.39259	-0.939761	0.610834	-1.53849	0.123929	0.428622	NS
chr1	48793637	48793857	.	open_991	6.45846	-0.865716	0.551005	-1.57116	0.116146	0.418072	NS
chr1	48817643	48817895	.	open_992	15.6811	-0.243277	0.365168	-0.666204	0.505281	0.750555	NS
chr1	48865699	48865962	.	open_993	5.76277	1.21065	0.614219	1.97104	0.0487199	0.292225	NS
chr1	48878492	48878729	.	open_994	8.88283	0.900787	0.468905	1.92104	0.0547261	0.309314	NS
chr1	48916120	48916757	.	open_995	23.3296	-0.447499	0.295621	-1.51376	0.130086	0.436741	NS
chr1	48931591	48932028	.	open_996	12.726	0.946934	0.415678	2.27805	0.0227238	0.200828	NS
chr1	48953288	48953494	.	open_997	4.8968	-1.14764	0.648525	-1.76962	0.0767908	0.356537	NS
chr1	49234131	49234311	.	open_998	4.8929	-0.0224965	0.628466	-0.0357959	0.971445	0.989227	NS
chr1	50023409	50024277	.	open_999	37.8418	-0.425027	0.234229	-1.81458	0.0695887	0.342301	NS
chr1	50047858	50048539	.	open_1000	33.8749	-0.514309	0.252119	-2.03994	0.0413559	0.270701	NS
chr1	50060377	50060750	.	open_1001	12.1905	0.807295	0.457972	1.76276	0.0779412	0.358165	NS
chr1	50081050	50081585	.	open_1002	17.3617	-0.665281	0.340263	-1.95519	0.0505603	0.297463	NS
chr1	50114830	50115117	.	open_1003	6.34381	0.715743	0.553978	1.29201	0.196354	0.51429	NS
chr1	50181315	50181746	.	open_1004	9.86048	0.79977	0.474923	1.684	0.0921817	0.383201	NS
chr1	50198047	50198464	.	open_1005	7.79363	-0.725321	0.514268	-1.4104	0.158423	0.470943	NS
chr1	50271740	50272367	.	open_1006	17.444	0.0766117	0.368096	0.20813	0.835128	0.930622	NS
chr1	50332941	50334018	.	open_1007	89.8007	-0.0744228	0.156381	-0.475908	0.63414	0.826541	NS
chr1	50342106	50342288	.	open_1008	4.64186	0.315339	0.629451	0.500975	0.616388	0.816678	NS
chr1	50348658	50349311	.	open_1009	20.2186	-0.186832	0.321405	-0.581299	0.561039	0.784726	NS
chr1	50368385	50368837	.	open_1010	15.3919	-0.303513	0.355269	-0.854318	0.392929	0.676969	NS
chr1	50377321	50377545	.	open_1011	6.01569	-0.378862	0.563944	-0.671807	0.501706	0.748512	NS
chr1	50453049	50453287	.	open_1012	5.00437	-1.33878	0.651333	-2.05544	0.0398363	0.26615	NS
chr1	50603670	50603858	.	open_1013	8.1932	1.08083	0.552199	1.95731	0.0503109	0.296582	NS
chr1	50605689	50605916	.	open_1014	7.28305	-0.507816	0.5081	-0.999441	0.317581	0.623664	NS
chr1	50620788	50621290	.	open_1015	15.6896	0.937833	0.360571	2.60097	0.00929608	0.120545	NS
chr1	50873119	50873969	.	open_1016	29.4258	-0.321053	0.269918	-1.18945	0.234265	0.55269	NS
chr1	50884247	50884470	.	open_1017	4.46578	-1.01092	0.675817	-1.49585	0.134694	0.443462	NS
chr1	50926124	50926347	.	open_1018	4.71428	-0.958281	0.652939	-1.46764	0.142201	0.452696	NS
chr1	50959516	50959806	.	open_1019	27.9904	0.111162	0.271213	0.409871	0.681901	0.853377	NS
chr1	50959984	50960751	.	open_1020	151.498	-0.107581	0.12997	-0.827736	0.40782	0.687096	NS
chr1	50968042	50969146	.	open_1021	150.196	0.158338	0.132043	1.19914	0.230473	0.548919	NS
chr1	50969384	50970302	.	open_1022	73.2474	-0.202653	0.173933	-1.16512	0.24397	0.562402	NS
chr1	50977689	50978546	.	open_1023	30.6064	-0.190646	0.256744	-0.742552	0.457753	0.721371	NS
chr1	51063207	51063468	.	open_1024	10.4581	2.04304	0.5364	3.8088	0.00013964	0.00793808	Gained
chr1	51235934	51236887	.	open_1025	84.8424	-0.0506178	0.166943	-0.303204	0.761734	0.894938	NS
chr1	51236900	51237235	.	open_1026	14.1351	0.30488	0.370215	0.823522	0.410211	0.688766	NS
chr1	51261375	51261667	.	open_1027	9.06006	1.5768	0.5189	3.03875	0.00237566	0.0511127	Gained
chr1	51296634	51297258	.	open_1028	24.6423	-0.159079	0.29905	-0.531949	0.594762	0.804381	NS
chr1	51331404	51331653	.	open_1029	6.75789	0.970562	0.539944	1.79752	0.0722526	0.348095	NS
chr1	51519010	51519651	.	open_1030	72.6864	-0.17369	0.177625	-0.977846	0.328151	0.631179	NS
chr1	51558343	51558908	.	open_1031	17.0048	1.34256	0.365585	3.67237	0.000240312	0.0114843	Gained
chr1	51569520	51569989	.	open_1032	11.6269	1.12434	0.44793	2.51007	0.0120707	0.140685	NS
chr1	51601262	51601618	.	open_1033	8.43327	0.514573	0.475979	1.08108	0.27966	0.592723	NS
chr1	51616897	51617697	.	open_1034	56.5361	-0.0326922	0.19469	-0.167919	0.866647	0.94466	NS
chr1	51637189	51637410	.	open_1035	6.60512	1.54627	0.586743	2.63534	0.0084053	0.113101	NS
chr1	51729133	51730105	.	open_1036	81.7993	-0.271629	0.170403	-1.59404	0.110928	0.410922	NS
chr1	51768735	51769204	.	open_1037	13.7238	0.315056	0.395186	0.797235	0.425315	0.699804	NS
chr1	51878276	51879299	.	open_1038	190.327	0.00693428	0.129529	0.0535347	0.957306	0.983606	NS
chr1	52002257	52002551	.	open_1039	16.9615	-0.177737	0.347924	-0.510851	0.609456	0.812781	NS
chr1	52032433	52034026	.	open_1040	73.7821	-0.152664	0.179738	-0.849368	0.395677	0.678774	NS
chr1	52054955	52056643	.	open_1041	184.692	-0.0694421	0.124559	-0.557503	0.577184	0.794351	NS
chr1	52126971	52127884	.	open_1042	19.9915	-0.410527	0.33773	-1.21555	0.224158	0.543146	NS
chr1	52128586	52128827	.	open_1043	5.75746	0.389855	0.582359	0.669441	0.503215	0.749273	NS
chr1	52141776	52142958	.	open_1044	105.396	-0.0266159	0.148508	-0.179222	0.857764	0.940474	NS
chr1	52296263	52296607	.	open_1045	12.4096	-0.0572987	0.412818	-0.138799	0.889609	0.954468	NS
chr1	52366006	52366713	.	open_1046	158.575	0.0943229	0.133694	0.705512	0.480492	0.735571	NS
chr1	52403814	52404970	.	open_1047	98.0262	-0.0402093	0.154331	-0.260538	0.794449	0.910757	NS
chr1	52552492	52553882	.	open_1048	148.885	-0.0703079	0.13494	-0.521031	0.602345	0.808978	NS
chr1	52686360	52686644	.	open_1049	8.89959	-0.702244	0.469063	-1.49712	0.134361	0.443116	NS
chr1	52697834	52698809	.	open_1050	74.8087	0.153554	0.182525	0.841275	0.400194	0.682041	NS
chr1	52702990	52703376	.	open_1051	35.977	0.213168	0.249993	0.852696	0.393828	0.67773	NS
chr1	52726142	52726806	.	open_1052	66.3768	-0.0404648	0.186781	-0.216643	0.828486	0.927508	NS
chr1	52842546	52843265	.	open_1053	63.409	-0.027292	0.187422	-0.145618	0.884223	0.951966	NS
chr1	52920902	52921896	.	open_1054	59.9834	-0.156586	0.192911	-0.811701	0.416963	0.693785	NS
chr1	52927073	52928242	.	open_1055	49.2003	0.00697826	0.20718	0.0336821	0.973131	0.989972	NS
chr1	53014821	53015494	.	open_1056	22.5995	0.274821	0.29678	0.926012	0.35444	0.649451	NS
chr1	53196533	53197152	.	open_1057	39.9699	-0.207463	0.230906	-0.898476	0.368932	0.659383	NS
chr1	53220177	53220954	.	open_1058	124.821	0.114117	0.140394	0.812832	0.416314	0.693457	NS
chr1	53238233	53238912	.	open_1059	54.4768	-0.227975	0.195886	-1.16382	0.244499	0.562793	NS
chr1	53326248	53326823	.	open_1060	42.0838	-0.132133	0.228481	-0.578313	0.563053	0.785907	NS
chr1	53393438	53393744	.	open_1061	16.8144	-0.509626	0.366505	-1.3905	0.164377	0.477674	NS
chr1	53444693	53445178	.	open_1062	18.6086	-0.194359	0.324355	-0.599217	0.549028	0.777192	NS
chr1	53485534	53486033	.	open_1063	19.3112	-0.252552	0.313831	-0.804737	0.420971	0.696962	NS
chr1	53599675	53599967	.	open_1064	6.35704	-0.631935	0.587676	-1.07531	0.282235	0.595574	NS
chr1	53601585	53601777	.	open_1065	6.47855	0.399881	0.538195	0.743004	0.457479	0.721175	NS
chr1	53739211	53739561	.	open_1066	40.7116	-0.208109	0.229581	-0.906473	0.364685	0.656685	NS
chr1	53837910	53838740	.	open_1067	185.175	0.153987	0.13876	1.10973	0.267113	0.582022	NS
chr1	53889587	53890157	.	open_1068	52.1948	-0.327607	0.203091	-1.6131	0.106723	0.404605	NS
chr1	53945486	53946511	.	open_1069	244.867	-0.00227192	0.111709	-0.0203378	0.983774	0.993758	NS
chr1	53957203	53957578	.	open_1070	12.9544	0.440169	0.389211	1.13093	0.258085	0.57465	NS
chr1	53963356	53963655	.	open_1071	7.93154	-0.323354	0.498431	-0.648744	0.516504	0.757195	NS
chr1	54037656	54037902	.	open_1072	4.94121	1.96092	0.708255	2.76866	0.00562877	0.0878963	Gained
chr1	54052792	54053945	.	open_1073	279.066	-0.0815721	0.128682	-0.633903	0.526144	0.763447	NS
chr1	54069654	54070304	.	open_1074	19.074	-0.416299	0.327975	-1.2693	0.204334	0.522094	NS
chr1	54081787	54082049	.	open_1075	13.757	-0.0662801	0.381585	-0.173697	0.862104	0.942336	NS
chr1	54121509	54121786	.	open_1076	15.4649	0.035152	0.369926	0.0950243	0.924296	0.970243	NS
chr1	54151215	54151460	.	open_1077	5.92887	0.945647	0.580373	1.62938	0.103233	0.399493	NS
chr1	54158026	54158276	.	open_1078	10.4066	2.03707	0.513159	3.96967	7.19717e-05	0.00519631	Gained
chr1	54199616	54200603	.	open_1079	92.2519	-0.0217895	0.172123	-0.126593	0.899263	0.958787	NS
chr1	54227435	54227661	.	open_1080	8.52868	0.887977	0.495834	1.79088	0.073313	0.350252	NS
chr1	54229483	54229831	.	open_1081	12.3033	1.07388	0.409377	2.6232	0.00871084	0.115606	NS
chr1	54319177	54319353	.	open_1082	3.77094	1.31051	0.77434	1.69242	0.0905665	0.379903	NS
chr1	54388422	54388613	.	open_1083	5.49308	0.20449	0.586856	0.34845	0.727503	0.877847	NS
chr1	54406401	54407011	.	open_1084	79.1752	0.117728	0.17041	0.690853	0.489658	0.741388	NS
chr1	54407429	54407733	.	open_1085	30.5333	0.509837	0.264415	1.92817	0.0538343	0.307059	NS
chr1	54488187	54488746	.	open_1086	59.4145	-0.0335122	0.19314	-0.173512	0.862249	0.942405	NS
chr1	54488837	54489752	.	open_1087	79.1127	-0.0872193	0.179491	-0.485925	0.62702	0.82251	NS
chr1	54516422	54516623	.	open_1088	6.08738	0.953436	0.577281	1.6516	0.0986165	0.393355	NS
chr1	54541989	54543022	.	open_1089	100.114	-0.0863956	0.161048	-0.536458	0.591642	0.80277	NS
chr1	54581716	54581935	.	open_1090	12.3793	1.22152	0.418303	2.92018	0.00349828	0.0649883	Gained
chr1	54672090	54672421	.	open_1091	12.0872	-0.81941	0.419697	-1.95238	0.0508926	0.29873	NS
chr1	54715562	54716212	.	open_1092	54.0716	0.0885542	0.197201	0.449056	0.653391	0.838178	NS
chr1	54764283	54765057	.	open_1093	175.729	-0.109277	0.127963	-0.853976	0.393118	0.677074	NS
chr1	54810468	54810850	.	open_1094	20.2233	-0.550836	0.328119	-1.67877	0.093197	0.384839	NS
chr1	54886827	54888016	.	open_1095	128.67	-0.0350982	0.139428	-0.25173	0.80125	0.914368	NS
chr1	54904520	54904766	.	open_1096	6.09332	0.96189	0.567743	1.69423	0.0902207	0.3795	NS
chr1	54935011	54935198	.	open_1097	6.08679	2.65008	0.729549	3.6325	0.000280694	0.0127011	Gained
chr1	54950463	54950944	.	open_1098	14.9222	-0.661903	0.372359	-1.77759	0.0754706	0.354208	NS
chr1	55022008	55022485	.	open_1099	30.0719	0.0902996	0.267329	0.337784	0.735526	0.881846	NS
chr1	55044855	55045059	.	open_1100	7.25157	-0.880113	0.537035	-1.63884	0.101247	0.396817	NS
chr1	55071562	55071997	.	open_1101	18.8006	-0.200622	0.329031	-0.609735	0.542037	0.7732	NS
chr1	55082357	55082552	.	open_1102	3.47995	0.245625	0.757524	0.324247	0.745751	0.887101	NS
chr1	55141595	55141893	.	open_1103	8.44379	-0.752269	0.488291	-1.54062	0.12341	0.427786	NS
chr1	55215294	55215822	.	open_1104	58.2755	-0.0353269	0.190616	-0.185331	0.85297	0.937913	NS
chr1	55233556	55233803	.	open_1105	7.54935	1.4794	0.565746	2.61495	0.00892396	0.117409	NS
chr1	55250541	55250793	.	open_1106	7.00022	-0.490412	0.525177	-0.933803	0.350405	0.646862	NS
chr1	55277517	55277955	.	open_1107	18.4887	0.0993244	0.345221	0.287712	0.773567	0.900411	NS
chr1	55321186	55321409	.	open_1108	5.29104	-0.039387	0.592158	-0.0665144	0.946968	0.979266	NS
chr1	55338318	55338503	.	open_1109	7.48465	-0.261438	0.50343	-0.519313	0.603542	0.809513	NS
chr1	55375616	55375815	.	open_1110	6.6123	-1.23105	0.580809	-2.11954	0.0340447	0.247204	NS
chr1	55383916	55384108	.	open_1111	5.81242	-0.858026	0.600454	-1.42896	0.153015	0.464486	NS
chr1	55428964	55429618	.	open_1112	40.1326	2.18917	0.439265	4.98371	6.23758e-07	0.000195302	Gained
chr1	55443116	55443804	.	open_1113	19.5667	0.651634	0.347802	1.87358	0.0609889	0.324406	NS
chr1	55541734	55541929	.	open_1114	6.09063	0.641242	0.575186	1.11484	0.264918	0.580438	NS
chr1	55572945	55573424	.	open_1115	12.7502	1.58357	0.438385	3.61228	0.000303511	0.0133271	Gained
chr1	55593647	55593854	.	open_1116	5.93588	-0.117661	0.593554	-0.198232	0.842864	0.933683	NS
chr1	55669895	55670112	.	open_1117	6.89219	-0.103331	0.518587	-0.199256	0.842063	0.933382	NS
chr1	55673306	55673818	.	open_1118	11.6697	0.202452	0.405393	0.499396	0.6175	0.817327	NS
chr1	55959958	55960201	.	open_1119	7.11137	-0.897901	0.528007	-1.70055	0.089028	0.377923	NS
chr1	56171092	56171396	.	open_1120	7.53989	0.555411	0.507018	1.09545	0.273321	0.587444	NS
chr1	56356634	56356992	.	open_1121	7.48782	0.172025	0.50635	0.339735	0.734056	0.88105	NS
chr1	56363064	56363563	.	open_1122	11.9038	0.811089	0.419715	1.93248	0.0533008	0.305445	NS
chr1	56376696	56376990	.	open_1123	11.6541	1.26766	0.47127	2.68988	0.0071478	0.101751	NS
chr1	56473483	56473842	.	open_1124	6.85901	-1.19923	0.562634	-2.13145	0.0330518	0.244062	NS
chr1	56578940	56579792	.	open_1125	100.761	-0.0893365	0.156768	-0.569864	0.56877	0.789417	NS
chr1	56585060	56585715	.	open_1126	18.7519	0.0320472	0.327585	0.0978287	0.922068	0.969102	NS
chr1	56645080	56645488	.	open_1127	17.2731	-0.595256	0.357549	-1.66482	0.0959484	0.389385	NS
chr1	56676807	56677025	.	open_1128	7.61303	1.60731	0.545251	2.94784	0.00320008	0.0615212	Gained
chr1	56688506	56688997	.	open_1129	22.048	1.12209	0.362759	3.0932	0.00198011	0.0455937	Gained
chr1	56803714	56803899	.	open_1130	14.3522	-0.118264	0.365981	-0.323144	0.746586	0.887618	NS
chr1	56821153	56821435	.	open_1131	15.4655	-0.279604	0.354273	-0.789232	0.429977	0.703595	NS
chr1	56831820	56832256	.	open_1132	13.7384	0.194115	0.392088	0.495081	0.620543	0.8188	NS
chr1	56970362	56970559	.	open_1133	6.09361	-0.455853	0.580924	-0.784703	0.432628	0.705353	NS
chr1	57058976	57059257	.	open_1134	6.54458	-0.668224	0.549859	-1.21527	0.224265	0.543272	NS
chr1	57064388	57064581	.	open_1135	5.86379	-0.00259992	0.589309	-0.0044118	0.99648	0.998339	NS
chr1	57125057	57125397	.	open_1136	9.18358	-0.642074	0.469217	-1.36839	0.171189	0.486071	NS
chr1	57150095	57150404	.	open_1137	7.17252	0.440859	0.515918	0.854515	0.39282	0.676894	NS
chr1	57171891	57172171	.	open_1138	5.79717	0.724088	0.591163	1.22485	0.220631	0.539515	NS
chr1	57253186	57253451	.	open_1139	5.64707	-0.787878	0.597032	-1.31966	0.186949	0.504376	NS
chr1	57295444	57295777	.	open_1140	6.29045	-0.727266	0.596791	-1.21863	0.222986	0.542112	NS
chr1	57424355	57425114	.	open_1141	21.5516	-0.603348	0.310369	-1.94397	0.0518989	0.301568	NS
chr1	57546609	57546866	.	open_1142	5.84285	0.937586	0.586137	1.5996	0.109687	0.409342	NS
chr1	57658625	57658817	.	open_1143	6.6066	2.05413	0.620143	3.31234	0.000925179	0.0272945	Gained
chr1	57770969	57771190	.	open_1144	7.7784	-0.495005	0.523572	-0.945439	0.344435	0.641884	NS
chr1	57905516	57905697	.	open_1145	6.74065	0.644959	0.551053	1.17041	0.241835	0.560358	NS
chr1	57908878	57909094	.	open_1146	5.54093	-0.505507	0.626771	-0.806526	0.41994	0.695996	NS
chr1	58041391	58041923	.	open_1147	13.068	1.16973	0.399939	2.92477	0.00344706	0.064353	Gained
chr1	58162859	58163363	.	open_1148	17.9687	-0.000758225	0.339615	-0.00223261	0.998219	0.999063	NS
chr1	58250052	58250625	.	open_1149	24.3372	-0.289557	0.300771	-0.962717	0.33569	0.63603	NS
chr1	58299155	58299389	.	open_1150	6.58372	0.459494	0.533183	0.861794	0.388801	0.673845	NS
chr1	58308180	58308380	.	open_1151	3.95708	1.34759	0.72389	1.8616	0.0626595	0.328414	NS
chr1	58397411	58397678	.	open_1152	8.13177	1.29319	0.516609	2.50322	0.0123069	0.1422	NS
chr1	58411996	58412492	.	open_1153	17.4029	1.47666	0.426803	3.45981	0.00054055	0.0195088	Gained
chr1	58515894	58516205	.	open_1154	10.6723	-1.02872	0.44428	-2.31548	0.0205868	0.190292	NS
chr1	58546170	58547089	.	open_1155	159.528	-0.140446	0.124959	-1.12394	0.26104	0.577027	NS
chr1	58573903	58574212	.	open_1156	11.2393	0.972616	0.436166	2.22992	0.0257527	0.214507	NS
chr1	58584335	58584982	.	open_1157	12.8	1.09574	0.455853	2.40372	0.0162292	0.166318	NS
chr1	58585377	58585602	.	open_1158	8.35926	0.181741	0.467777	0.388521	0.697631	0.862444	NS
chr1	58585940	58586142	.	open_1159	4.45486	1.3652	0.692104	1.97254	0.0485478	0.291755	NS
chr1	58592285	58592894	.	open_1160	13.0008	0.860775	0.402057	2.14093	0.03228	0.241066	NS
chr1	58618361	58618549	.	open_1161	7.06003	1.62329	0.594983	2.7283	0.00636622	0.0945795	Gained
chr1	58652553	58652973	.	open_1162	14.2603	-0.56041	0.377771	-1.48346	0.137951	0.447464	NS
chr1	58699577	58700257	.	open_1163	60.7343	-0.00776827	0.195111	-0.0398147	0.968241	0.987909	NS
chr1	58727316	58727761	.	open_1164	14.2029	1.26233	0.405086	3.11619	0.00183202	0.0430753	Gained
chr1	58745836	58746069	.	open_1165	6.94696	0.606721	0.525631	1.15427	0.248389	0.566463	NS
chr1	58755371	58755751	.	open_1166	12.1741	1.56847	0.481834	3.25521	0.0011331	0.0313782	Gained
chr1	58762933	58763402	.	open_1167	8.5344	1.46852	0.506245	2.90081	0.003722	0.0675336	Gained
chr1	58769386	58769657	.	open_1168	8.37873	0.329743	0.479829	0.687211	0.49195	0.742711	NS
chr1	58777322	58777579	.	open_1169	9.21839	-0.816773	0.457656	-1.78469	0.0743119	0.352109	NS
chr1	58783289	58784700	.	open_1170	489.303	0.0540595	0.102408	0.527883	0.59758	0.806064	NS
chr1	58816266	58816905	.	open_1171	26.2855	-0.483114	0.299803	-1.61144	0.107083	0.40511	NS
chr1	58848796	58849374	.	open_1172	17.226	1.69557	0.39527	4.28965	1.78958e-05	0.00208811	Gained
chr1	58881454	58881628	.	open_1173	5.62709	1.18395	0.610962	1.93785	0.0526413	0.30347	NS
chr1	58883178	58883503	.	open_1174	10.1069	1.24702	0.463793	2.68874	0.0071722	0.101927	NS
chr1	58896420	58896654	.	open_1175	4.86813	0.789626	0.630525	1.25233	0.210449	0.528879	NS
chr1	58903584	58904227	.	open_1176	37.9049	-0.476123	0.254457	-1.87114	0.0613262	0.325469	NS
chr1	58932999	58933310	.	open_1177	10.1567	1.057	0.451988	2.33857	0.0193578	0.18381	NS
chr1	58988378	58988596	.	open_1178	5.03354	0.841581	0.624415	1.34779	0.177726	0.494275	NS
chr1	59044098	59044320	.	open_1179	5.53344	0.550924	0.593611	0.928089	0.353361	0.648944	NS
chr1	59047492	59047769	.	open_1180	7.882	-0.826746	0.499477	-1.65522	0.0978796	0.392175	NS
chr1	59128429	59128665	.	open_1181	5.36958	1.88335	0.679475	2.77177	0.00557532	0.087508	Gained
chr1	59128842	59129054	.	open_1182	5.33796	1.82657	0.66568	2.74391	0.00607128	0.0921308	Gained
chr1	59143204	59143425	.	open_1183	9.19207	0.755541	0.468738	1.61186	0.106992	0.405034	NS
chr1	59151072	59151616	.	open_1184	19.792	1.19308	0.358837	3.32485	0.000884664	0.0265008	Gained
chr1	59256889	59257071	.	open_1185	3.4454	-0.272091	0.749191	-0.36318	0.71647	0.871992	NS
chr1	59259824	59260027	.	open_1186	4.65766	-1.41735	0.685238	-2.06841	0.0386012	0.262222	NS
chr1	59290176	59290398	.	open_1187	11.8448	-0.319485	0.404084	-0.790641	0.429154	0.702949	NS
chr1	59296408	59297304	.	open_1188	206.168	-0.232905	0.143436	-1.62375	0.104429	0.401308	NS
chr1	59487620	59487802	.	open_1189	5.60001	0.631255	0.591469	1.06727	0.285852	0.59869	NS
chr1	59502318	59502697	.	open_1190	10.5025	1.2557	0.451241	2.78278	0.0053896	0.0856015	Gained
chr1	59601112	59601405	.	open_1191	12.193	1.16258	0.45582	2.55053	0.010756	0.131382	NS
chr1	59686073	59686280	.	open_1192	5.01384	0.783259	0.650686	1.20374	0.228689	0.547537	NS
chr1	59730452	59731099	.	open_1193	12.4142	1.06099	0.412114	2.57451	0.0100382	0.12605	NS
chr1	59738733	59739018	.	open_1194	9.24212	1.36287	0.497238	2.74089	0.00612734	0.0925021	Gained
chr1	59759196	59759770	.	open_1195	34.6077	-0.31666	0.246853	-1.28279	0.199565	0.517651	NS
chr1	59776864	59777156	.	open_1196	6.54894	0.541521	0.576581	0.939193	0.347632	0.644612	NS
chr1	59814309	59815336	.	open_1197	86.8059	0.146133	0.186037	0.785504	0.432158	0.704986	NS
chr1	59881610	59881784	.	open_1198	3.77199	1.38795	0.739572	1.8767	0.0605594	0.32306	NS
chr1	59884957	59885254	.	open_1199	5.59454	-0.858433	0.627176	-1.36873	0.171085	0.486071	NS
chr1	59903334	59903536	.	open_1200	8.14293	0.461268	0.518563	0.889512	0.373728	0.662864	NS
chr1	59905600	59905815	.	open_1201	4.93756	0.36382	0.652394	0.557669	0.57707	0.794294	NS
chr1	59926469	59927302	.	open_1202	22.2115	0.275042	0.299021	0.919808	0.357673	0.651634	NS
chr1	59947234	59947761	.	open_1203	22.4628	-0.0183628	0.308706	-0.0594832	0.952567	0.981505	NS
chr1	59971371	59971783	.	open_1204	17.3065	0.111632	0.349554	0.319356	0.749456	0.889209	NS
chr1	59976755	59977000	.	open_1205	10.4961	-0.294567	0.427534	-0.688992	0.490828	0.742169	NS
chr1	60001603	60001810	.	open_1206	6.80989	0.0984241	0.57113	0.172332	0.863176	0.94283	NS
chr1	60280896	60281881	.	open_1207	45.3091	-0.0414691	0.222599	-0.186295	0.852213	0.937535	NS
chr1	60287742	60288026	.	open_1208	5.89455	-1.94208	0.641133	-3.02913	0.00245256	0.0521193	Lost
chr1	60425493	60425811	.	open_1209	11.7683	-0.528063	0.423545	-1.24677	0.212482	0.530613	NS
chr1	60468412	60468663	.	open_1210	6.41786	-0.676927	0.551744	-1.22689	0.219866	0.538719	NS
chr1	60503126	60503324	.	open_1211	5.27618	0.757326	0.65239	1.16085	0.245704	0.563862	NS
chr1	60558799	60558979	.	open_1212	4.66917	-1.13096	0.672987	-1.6805	0.0928596	0.384343	NS
chr1	60573855	60574175	.	open_1213	8.6666	0.780579	0.496384	1.57253	0.115828	0.417625	NS
chr1	60747453	60747733	.	open_1214	5.08293	0.260586	0.622895	0.418347	0.675693	0.850298	NS
chr1	60757523	60757753	.	open_1215	5.20163	0.672734	0.599143	1.12283	0.261511	0.57714	NS
chr1	60763238	60763538	.	open_1216	6.52733	0.645773	0.557951	1.1574	0.247108	0.565246	NS
chr1	60809336	60809639	.	open_1217	7.41445	1.27428	0.558475	2.28171	0.0225067	0.199811	NS
chr1	60822262	60822470	.	open_1218	4.78357	-2.0308	0.725455	-2.79935	0.00512058	0.0827634	Lost
chr1	60848537	60848794	.	open_1219	8.17135	-0.748885	0.500548	-1.49613	0.13462	0.443381	NS
chr1	60887156	60887418	.	open_1220	6.72471	-0.144752	0.529769	-0.273236	0.784671	0.905797	NS
chr1	60890567	60890819	.	open_1221	6.65849	0.188076	0.528108	0.356131	0.721743	0.874637	NS
chr1	60926895	60927098	.	open_1222	5.15565	-0.777414	0.615023	-1.26404	0.206216	0.523867	NS
chr1	60952069	60952539	.	open_1223	9.72545	-0.94366	0.486557	-1.93946	0.052445	0.302821	NS
chr1	60972836	60973029	.	open_1224	9.41732	0.939035	0.506352	1.85451	0.0636661	0.330466	NS
chr1	60978898	60979347	.	open_1225	16.5527	-0.572675	0.34264	-1.67136	0.094651	0.387441	NS
chr1	61042733	61043315	.	open_1226	18.1517	0.556829	0.328782	1.69361	0.0903392	0.379681	NS
chr1	61049814	61050430	.	open_1227	44.7995	-0.378072	0.215535	-1.75411	0.0794117	0.36001	NS
chr1	61056813	61057367	.	open_1228	29.0444	-0.120538	0.284625	-0.423497	0.671933	0.84821	NS
chr1	61057779	61057976	.	open_1229	11.5038	0.45337	0.409937	1.10595	0.268748	0.583212	NS
chr1	61076907	61077277	.	open_1230	56.46	0.128423	0.195231	0.657803	0.510665	0.753439	NS
chr1	61077948	61078196	.	open_1231	61.5326	-0.0895723	0.200684	-0.446334	0.655356	0.839272	NS
chr1	61081747	61082826	.	open_1232	135.619	-0.0618377	0.13902	-0.44481	0.656457	0.839936	NS
chr1	61093908	61094092	.	open_1233	5.18375	-0.755668	0.612768	-1.23321	0.217499	0.536447	NS
chr1	61103248	61103434	.	open_1234	6.79288	-0.247506	0.555447	-0.445598	0.655888	0.839642	NS
chr1	61115379	61115654	.	open_1235	8.02431	-0.824506	0.504312	-1.63491	0.102067	0.397964	NS
chr1	61151455	61151728	.	open_1236	6.99994	0.578815	0.517746	1.11795	0.263588	0.579092	NS
chr1	61156966	61157158	.	open_1237	8.967	0.211873	0.495907	0.427243	0.669202	0.846653	NS
chr1	61157387	61157796	.	open_1238	11.542	0.158331	0.409971	0.386201	0.699348	0.863418	NS
chr1	61170309	61170888	.	open_1239	15.4902	0.0747449	0.360329	0.207435	0.83567	0.930733	NS
chr1	61183387	61184712	.	open_1240	84.9489	-0.0309403	0.164988	-0.187531	0.851244	0.937107	NS
chr1	61224394	61225183	.	open_1241	107.662	-0.212558	0.161906	-1.31285	0.189235	0.506871	NS
chr1	61226839	61227143	.	open_1242	44.527	-0.281731	0.233154	-1.20835	0.226912	0.546028	NS
chr1	61233023	61234549	.	open_1243	191.904	-0.295493	0.126494	-2.33603	0.0194898	0.184498	NS
chr1	61241121	61242376	.	open_1244	258.48	-0.127689	0.125674	-1.01603	0.309614	0.617634	NS
chr1	61244215	61244592	.	open_1245	64.6121	-0.0744654	0.187597	-0.396943	0.691409	0.858981	NS
chr1	61249610	61250018	.	open_1246	17.5934	-0.0480491	0.34047	-0.141126	0.887771	0.953578	NS
chr1	61277233	61277494	.	open_1247	14.8159	0.427456	0.384815	1.11081	0.266651	0.581739	NS
chr1	61278507	61278824	.	open_1248	30.4643	-0.36009	0.256494	-1.4039	0.16035	0.473284	NS
chr1	61284268	61285109	.	open_1249	57.8021	-0.165848	0.195526	-0.848213	0.396319	0.67929	NS
chr1	61287404	61288168	.	open_1250	67.9958	-0.0109794	0.184296	-0.0595748	0.952494	0.981478	NS
chr1	61294787	61295123	.	open_1251	18.6158	-0.420343	0.332952	-1.26247	0.206778	0.524868	NS
chr1	61297250	61298005	.	open_1252	41.2561	-0.671696	0.259723	-2.5862	0.00970409	0.123434	NS
chr1	61301878	61302205	.	open_1253	15.9347	0.198692	0.367347	0.540884	0.588588	0.800841	NS
chr1	61318319	61319091	.	open_1254	51.3865	0.0757594	0.217363	0.348538	0.727436	0.877798	NS
chr1	61323869	61324551	.	open_1255	30.5407	-0.175892	0.254724	-0.690519	0.489868	0.74149	NS
chr1	61325392	61326056	.	open_1256	33.6872	-0.542316	0.256635	-2.11318	0.0345852	0.249126	NS
chr1	61337781	61338720	.	open_1257	66.2103	0.0886829	0.183625	0.482956	0.629127	0.823297	NS
chr1	61350313	61350511	.	open_1258	5.90134	-0.601157	0.573092	-1.04897	0.294191	0.605663	NS
chr1	61388661	61388877	.	open_1259	4.52331	1.92447	0.734707	2.61937	0.00880927	0.116529	NS
chr1	61426806	61427104	.	open_1260	8.7945	-0.234518	0.469157	-0.499871	0.617166	0.817152	NS
chr1	61437900	61438083	.	open_1261	5.49611	-0.490936	0.581011	-0.844969	0.398128	0.680655	NS
chr1	61452952	61453721	.	open_1262	51.6468	-0.220356	0.209292	-1.05286	0.292404	0.604262	NS
chr1	61471031	61471365	.	open_1263	7.80316	-1.04802	0.515116	-2.03453	0.0418981	0.272134	NS
chr1	61481179	61481649	.	open_1264	13.4663	0.796015	0.420643	1.89238	0.0584406	0.318754	NS
chr1	61641813	61641995	.	open_1265	14.2872	-0.669557	0.390454	-1.71482	0.0863789	0.373304	NS
chr1	61724356	61725645	.	open_1266	99.1589	0.0974464	0.153004	0.63689	0.524197	0.762268	NS
chr1	61742146	61743319	.	open_1267	107.089	0.0626271	0.162856	0.384555	0.700567	0.864149	NS
chr1	61781409	61781637	.	open_1268	5.00346	-1.10915	0.651363	-1.70282	0.0886016	0.377304	NS
chr1	61851884	61852074	.	open_1269	5.85493	0.464035	0.601962	0.77087	0.440784	0.71027	NS
chr1	61852260	61852495	.	open_1270	8.91848	-0.538632	0.469692	-1.14678	0.251474	0.56887	NS
chr1	61951863	61952621	.	open_1271	29.9481	0.52912	0.28075	1.88467	0.0594746	0.320924	NS
chr1	62082685	62082958	.	open_1272	9.63341	-0.250383	0.441342	-0.567322	0.570495	0.790131	NS
chr1	62122448	62122708	.	open_1273	4.82842	0.987244	0.653554	1.51058	0.130896	0.43785	NS
chr1	62131221	62131553	.	open_1274	16.3129	-0.220577	0.348396	-0.63312	0.526655	0.763811	NS
chr1	62175717	62175991	.	open_1275	9.61011	0.0967612	0.452414	0.213878	0.830643	0.928415	NS
chr1	62230684	62231113	.	open_1276	17.3599	2.40193	0.415713	5.77786	7.56563e-09	9.24312e-06	Gained
chr1	62321513	62321736	.	open_1277	8.20551	1.0715	0.51026	2.09991	0.0357366	0.253066	NS
chr1	62436089	62437501	.	open_1278	409.898	0.0531704	0.111545	0.47667	0.633597	0.826093	NS
chr1	62446456	62446644	.	open_1279	5.54037	-0.852479	0.59448	-1.43399	0.151575	0.463028	NS
chr1	62448741	62448971	.	open_1280	5.05778	0.347717	0.633985	0.548463	0.583374	0.797982	NS
chr1	62457591	62457877	.	open_1281	6.6808	0.602559	0.53946	1.11697	0.264008	0.579606	NS
chr1	62530392	62531165	.	open_1282	26.968	-0.276119	0.296514	-0.931218	0.351741	0.647943	NS
chr1	62622052	62622245	.	open_1283	7.3408	1.75428	0.597292	2.93705	0.00331347	0.0628289	Gained
chr1	62687470	62688158	.	open_1284	50.4221	-0.270502	0.206859	-1.30766	0.190988	0.508881	NS
chr1	62688339	62688749	.	open_1285	49.737	0.114159	0.21582	0.528954	0.596837	0.805576	NS
chr1	62712609	62712966	.	open_1286	8.36318	-0.31241	0.481523	-0.648796	0.51647	0.757184	NS
chr1	62713898	62714131	.	open_1287	5.3494	-0.756914	0.609431	-1.242	0.214236	0.532964	NS
chr1	62720910	62721506	.	open_1288	26.8548	-0.451131	0.31509	-1.43175	0.152214	0.463774	NS
chr1	62728967	62729437	.	open_1289	21.2625	-0.589505	0.330253	-1.78501	0.0742602	0.352003	NS
chr1	62745068	62745487	.	open_1290	11.0641	-0.242989	0.417225	-0.582394	0.560301	0.784152	NS
chr1	62746550	62746856	.	open_1291	11.0653	0.118569	0.417704	0.28386	0.776517	0.901646	NS
chr1	62783713	62784545	.	open_1292	122.024	-0.136611	0.148684	-0.9188	0.3582	0.652052	NS
chr1	62891941	62892189	.	open_1293	5.09449	0.591006	0.619964	0.95329	0.340443	0.639571	NS
chr1	63148980	63149287	.	open_1294	10.4481	-0.336776	0.428235	-0.786428	0.431617	0.704674	NS
chr1	63276844	63277082	.	open_1295	6.10825	-0.697471	0.559839	-1.24584	0.212823	0.531051	NS
chr1	63316883	63317615	.	open_1296	46.4467	-0.12818	0.214037	-0.598869	0.54926	0.77729	NS
chr1	63367236	63368131	.	open_1297	136.215	0.0697526	0.140095	0.497894	0.618559	0.817797	NS
chr1	63389953	63390165	.	open_1298	5.62223	-1.1881	0.651424	-1.82385	0.0681752	0.340183	NS
chr1	63441556	63442258	.	open_1299	23.7805	0.159315	0.284781	0.55943	0.575868	0.793411	NS
chr1	63522749	63523933	.	open_1300	109.401	0.00153852	0.159897	0.00962196	0.992323	0.996915	NS
chr1	63593225	63594454	.	open_1301	81.2229	0.116472	0.169362	0.687712	0.491634	0.742468	NS
chr1	63674505	63675066	.	open_1302	16.3476	0.31169	0.350801	0.888508	0.374267	0.663363	NS
chr1	63706508	63706737	.	open_1303	6.92831	0.347553	0.52575	0.661062	0.508572	0.752455	NS
chr1	63746286	63746569	.	open_1304	5.86691	1.63416	0.635977	2.56953	0.0101837	0.127121	NS
chr1	63773674	63774275	.	open_1305	74.5625	-0.218976	0.173888	-1.25929	0.207925	0.526003	NS
chr1	63920524	63921097	.	open_1306	16.5026	1.24542	0.37512	3.32006	0.000899968	0.0267756	Gained
chr1	63940357	63940614	.	open_1307	5.14057	-1.36462	0.642065	-2.12536	0.0335569	0.24581	NS
chr1	63969562	63969895	.	open_1308	9.78341	1.1344	0.466445	2.43202	0.0150148	0.158862	NS
chr1	64006523	64007096	.	open_1309	12.7161	0.87018	0.406096	2.1428	0.0321295	0.240505	NS
chr1	64039664	64039852	.	open_1310	6.54428	1.58732	0.605701	2.62064	0.00877657	0.116203	NS
chr1	64136924	64137445	.	open_1311	18.3453	-0.0992904	0.331615	-0.299415	0.764624	0.89617	NS
chr1	64214013	64214222	.	open_1312	4.31554	-1.04475	0.691899	-1.50997	0.131052	0.437996	NS
chr1	64246491	64246745	.	open_1313	8.74358	0.355377	0.473264	0.750905	0.45271	0.718135	NS
chr1	64247528	64247791	.	open_1314	6.35956	0.398401	0.550168	0.724145	0.468977	0.728052	NS
chr1	64263537	64263742	.	open_1315	4.19894	0.898326	0.687611	1.30645	0.191401	0.509233	NS
chr1	64269213	64269675	.	open_1316	12.976	-0.622424	0.403252	-1.54351	0.122706	0.426699	NS
chr1	64343270	64344170	.	open_1317	30.7076	1.75034	0.301164	5.81191	6.17655e-09	8.18826e-06	Gained
chr1	64469862	64470463	.	open_1318	65.7827	-0.0921185	0.186059	-0.495105	0.620526	0.8188	NS
chr1	64471049	64471248	.	open_1319	13.4176	-0.359646	0.395794	-0.908671	0.363524	0.655926	NS
chr1	64505264	64505456	.	open_1320	5.71834	-0.811509	0.620742	-1.30732	0.191104	0.508881	NS
chr1	64517182	64517452	.	open_1321	6.69551	1.87511	0.603162	3.10881	0.00187844	0.0438853	Gained
chr1	64517864	64518069	.	open_1322	5.56913	0.0216856	0.592125	0.0366233	0.970785	0.988975	NS
chr1	64623791	64624115	.	open_1323	8.06842	0.870056	0.497532	1.74874	0.0803352	0.361723	NS
chr1	64686875	64687126	.	open_1324	9.63828	0.325013	0.445316	0.729847	0.465483	0.725809	NS
chr1	64744457	64745108	.	open_1325	75.9497	-0.0121909	0.169621	-0.0718713	0.942704	0.977436	NS
chr1	64745278	64746011	.	open_1326	40.1275	0.0549326	0.224008	0.245226	0.806281	0.916714	NS
chr1	64823888	64824505	.	open_1327	19.6211	-0.213387	0.322471	-0.661725	0.508147	0.752272	NS
chr1	64897996	64898798	.	open_1328	27.4339	1.72158	0.333579	5.16093	2.45726e-07	0.000107068	Gained
chr1	64917277	64918008	.	open_1329	36.9452	1.53347	0.274897	5.57833	2.42839e-08	2.16154e-05	Gained
chr1	64933417	64934004	.	open_1330	12.5361	-0.401231	0.405826	-0.988677	0.322821	0.627475	NS
chr1	64934237	64934430	.	open_1331	5.4413	-0.551416	0.613365	-0.899001	0.368652	0.659167	NS
chr1	64955285	64955526	.	open_1332	8.27966	-1.028	0.500662	-2.05328	0.0400458	0.266778	NS
chr1	64965595	64966955	.	open_1333	150.035	-0.0168247	0.138694	-0.121308	0.903447	0.961074	NS
chr1	65021791	65021999	.	open_1334	4.31559	0.705201	0.692042	1.01901	0.308196	0.616563	NS
chr1	65050347	65050584	.	open_1335	6.20264	-1.01673	0.577844	-1.75952	0.0784893	0.358996	NS
chr1	65058459	65058658	.	open_1336	6.52194	0.667346	0.559782	1.19215	0.233201	0.551685	NS
chr1	65066595	65067248	.	open_1337	46.9728	0.273548	0.209249	1.30728	0.191117	0.508881	NS
chr1	65075002	65075327	.	open_1338	8.30298	-0.621773	0.490606	-1.26736	0.205028	0.522855	NS
chr1	65141496	65142116	.	open_1339	13.3256	0.948894	0.396298	2.39439	0.0166479	0.16894	NS
chr1	65147855	65148244	.	open_1340	18.96	0.2212	0.330978	0.668322	0.503928	0.749589	NS
chr1	65148449	65149156	.	open_1341	51.5509	-0.0611828	0.220654	-0.27728	0.781565	0.90444	NS
chr1	65209237	65209678	.	open_1342	12.869	0.0601434	0.389517	0.154405	0.87729	0.949303	NS
chr1	65233695	65233875	.	open_1343	6.51568	0.423333	0.531198	0.79694	0.425486	0.699946	NS
chr1	65248045	65248222	.	open_1344	6.22939	1.56172	0.596799	2.61683	0.00887507	0.117026	NS
chr1	65253947	65255114	.	open_1345	87.5339	-0.246247	0.171557	-1.43536	0.151185	0.462839	NS
chr1	65260913	65261142	.	open_1346	7.67681	1.08445	0.550274	1.97075	0.0487524	0.292308	NS
chr1	65309221	65310139	.	open_1347	26.8368	-0.0396966	0.272283	-0.145792	0.884086	0.951952	NS
chr1	65396081	65396416	.	open_1348	9.41885	0.758794	0.465886	1.62871	0.103374	0.399741	NS
chr1	65419818	65420914	.	open_1349	324.805	-0.140152	0.111351	-1.25866	0.208154	0.526175	NS
chr1	65425774	65426057	.	open_1350	14.9289	1.50807	0.398305	3.78622	0.000152953	0.00843493	Gained
chr1	65434625	65435163	.	open_1351	14.5904	0.61317	0.397027	1.5444	0.12249	0.426304	NS
chr1	65459338	65459661	.	open_1352	10.2563	0.340866	0.43713	0.779784	0.435518	0.706876	NS
chr1	65467592	65467875	.	open_1353	11.6223	2.22379	0.493176	4.50912	6.50979e-06	0.0010489	Gained
chr1	65469238	65469655	.	open_1354	9.60088	0.78986	0.474146	1.66586	0.0957414	0.38906	NS
chr1	65469902	65470083	.	open_1355	5.11866	0.963906	0.618745	1.55784	0.119271	0.422336	NS
chr1	65659460	65659805	.	open_1356	5.76203	-0.88208	0.590331	-1.49421	0.13512	0.444133	NS
chr1	65677623	65677935	.	open_1357	5.44587	-1.0614	0.650597	-1.63143	0.1028	0.398995	NS
chr1	65678102	65678288	.	open_1358	5.01705	0.193559	0.614153	0.315165	0.752637	0.890845	NS
chr1	65687625	65688133	.	open_1359	17.2642	0.536365	0.345175	1.5539	0.120209	0.423723	NS
chr1	65706262	65706478	.	open_1360	4.63275	-0.892547	0.679077	-1.31435	0.188727	0.506343	NS
chr1	65758387	65758685	.	open_1361	7.48657	0.449224	0.541384	0.82977	0.406669	0.68611	NS
chr1	65958973	65959495	.	open_1362	15.1921	0.329936	0.366046	0.901352	0.367401	0.658517	NS
chr1	65992756	65992994	.	open_1363	6.0261	-0.532478	0.571021	-0.932503	0.351077	0.647472	NS
chr1	66047665	66047990	.	open_1364	8.71796	-1.00912	0.500679	-2.01551	0.0438516	0.277899	NS
chr1	66156480	66156753	.	open_1365	4.10285	1.84028	0.759117	2.42423	0.0153408	0.161	NS
chr1	66242618	66243144	.	open_1366	37.8707	-0.281053	0.246595	-1.13973	0.254397	0.571365	NS
chr1	66260914	66261111	.	open_1367	6.66758	-0.73297	0.534159	-1.37219	0.170003	0.484932	NS
chr1	66271379	66271563	.	open_1368	6.50636	1.00105	0.554875	1.80411	0.0712146	0.345822	NS
chr1	66332347	66332640	.	open_1369	6.78413	0.343186	0.528756	0.649043	0.51631	0.75712	NS
chr1	66414103	66414385	.	open_1370	6.61387	-1.09159	0.569609	-1.91639	0.0553157	0.311183	NS
chr1	66436730	66436953	.	open_1371	6.11398	0.754962	0.579349	1.30312	0.192533	0.510395	NS
chr1	66446566	66446810	.	open_1372	10.6036	-0.0823644	0.426126	-0.193286	0.846735	0.935326	NS
chr1	66503658	66504266	.	open_1373	19.1891	-0.0949925	0.33935	-0.279925	0.779535	0.90352	NS
chr1	66534035	66534394	.	open_1374	10.3968	-0.0398482	0.428685	-0.0929543	0.92594	0.970878	NS
chr1	66543466	66543740	.	open_1375	12.4389	1.60903	0.492538	3.26682	0.00108764	0.0304305	Gained
chr1	66606675	66606985	.	open_1376	7.87161	-0.29946	0.535	-0.559738	0.575658	0.793251	NS
chr1	66628958	66629249	.	open_1377	6.29007	-1.28097	0.582912	-2.19753	0.0279826	0.223588	NS
chr1	66635492	66635781	.	open_1378	5.42972	-0.856016	0.606386	-1.41167	0.158048	0.470571	NS
chr1	66642052	66642277	.	open_1379	6.7482	-0.128227	0.530529	-0.241696	0.809016	0.917965	NS
chr1	66682409	66682597	.	open_1380	6.35306	0.66799	0.560899	1.19093	0.233682	0.552123	NS
chr1	66689223	66689429	.	open_1381	6.63926	0.628143	0.533972	1.17636	0.239452	0.558061	NS
chr1	66699181	66699375	.	open_1382	7.24577	-0.0150383	0.554636	-0.0271139	0.978369	0.991965	NS
chr1	66725866	66726267	.	open_1383	13.8006	0.267915	0.386554	0.693085	0.488256	0.740754	NS
chr1	66765054	66765237	.	open_1384	10.3808	-0.231303	0.428362	-0.539971	0.589217	0.801189	NS
chr1	66924596	66925750	.	open_1385	317.603	-0.0134463	0.104215	-0.129025	0.897338	0.957944	NS
chr1	66929875	66930962	.	open_1386	255.318	0.117955	0.109372	1.07847	0.280822	0.593991	NS
chr1	66938645	66938852	.	open_1387	7.20678	0.231998	0.518107	0.447781	0.654311	0.838842	NS
chr1	66944612	66945134	.	open_1388	18.0407	2.0656	0.381922	5.40843	6.35803e-08	4.12663e-05	Gained
chr1	66996164	66996572	.	open_1389	15.0631	-0.188953	0.365947	-0.516339	0.605617	0.810341	NS
chr1	67053255	67054662	.	open_1390	132.282	-0.0865392	0.147578	-0.586397	0.557609	0.782528	NS
chr1	67060861	67061065	.	open_1391	9.2795	1.14407	0.52134	2.19449	0.0282004	0.224823	NS
chr1	67094364	67094650	.	open_1392	6.18833	-0.935044	0.589968	-1.58491	0.112988	0.414388	NS
chr1	67137374	67137655	.	open_1393	7.96048	1.13855	0.522399	2.17946	0.0292975	0.229233	NS
chr1	67148955	67149402	.	open_1394	18.8789	-0.0639162	0.323536	-0.197555	0.843393	0.93386	NS
chr1	67347806	67348379	.	open_1395	17.3319	0.547036	0.351542	1.55611	0.119683	0.422863	NS
chr1	67404308	67404613	.	open_1396	9.68269	0.874558	0.478161	1.829	0.0673993	0.338578	NS
chr1	67430131	67431152	.	open_1397	276.563	0.00161274	0.114451	0.0140911	0.988757	0.995449	NS
chr1	67500435	67500864	.	open_1398	30.1306	-0.5659	0.26705	-2.11908	0.0340836	0.247408	NS
chr1	67532380	67532845	.	open_1399	20.4517	-0.221288	0.320109	-0.69129	0.489383	0.741189	NS
chr1	67552317	67552729	.	open_1400	12.3508	0.720609	0.436046	1.6526	0.0984125	0.393045	NS
chr1	67559354	67559640	.	open_1401	8.216	0.87627	0.488491	1.79383	0.0728403	0.349575	NS
chr1	67561788	67562054	.	open_1402	15.7365	-0.0654302	0.368042	-0.177779	0.858896	0.941043	NS
chr1	67570304	67571031	.	open_1403	21.9432	1.78367	0.349425	5.10458	3.3153e-07	0.000127326	Gained
chr1	67626594	67627012	.	open_1404	10.9563	1.75731	0.462662	3.79825	0.000145719	0.00816496	Gained
chr1	67627407	67627717	.	open_1405	9.05885	1.28758	0.497403	2.58861	0.0096363	0.123178	NS
chr1	67646790	67647337	.	open_1406	11.8532	1.20896	0.420361	2.87601	0.00402734	0.0710462	Gained
chr1	67684932	67685584	.	open_1407	146.494	0.0591913	0.138498	0.427379	0.669103	0.846653	NS
chr1	67700916	67701198	.	open_1408	8.64628	1.06334	0.495616	2.14549	0.0319136	0.239833	NS
chr1	67708740	67708928	.	open_1409	5.77616	1.48228	0.617736	2.39953	0.0164161	0.167243	NS
chr1	67725011	67725226	.	open_1410	7.68128	2.62581	0.632413	4.15204	3.29522e-05	0.00305989	Gained
chr1	67736100	67736397	.	open_1411	7.76018	1.42513	0.546844	2.6061	0.00915785	0.119422	NS
chr1	67749853	67750228	.	open_1412	12.7029	1.15334	0.428563	2.69118	0.00711996	0.101494	NS
chr1	67760204	67760651	.	open_1413	17.8265	0.0789998	0.333092	0.237171	0.812524	0.919868	NS
chr1	67771161	67771466	.	open_1414	11.5754	1.05487	0.440894	2.39257	0.0167307	0.16941	NS
chr1	67791784	67791965	.	open_1415	8.83828	0.630606	0.526366	1.19804	0.230903	0.549168	NS
chr1	67832189	67833680	.	open_1416	62.9606	0.0533921	0.181613	0.293988	0.768767	0.898254	NS
chr1	67850055	67851047	.	open_1417	23.739	0.595301	0.311252	1.9126	0.0557988	0.312485	NS
chr1	67853804	67853991	.	open_1418	10.6483	-0.167502	0.430849	-0.388772	0.697445	0.862349	NS
chr1	67890056	67890275	.	open_1419	7.55021	0.898681	0.523452	1.71684	0.0860088	0.372428	NS
chr1	68058189	68058491	.	open_1420	10.8706	-0.578459	0.418427	-1.38246	0.166831	0.480915	NS
chr1	68073127	68073361	.	open_1421	6.17332	-0.203634	0.560538	-0.363283	0.716393	0.871936	NS
chr1	68111750	68112244	.	open_1422	23.5695	0.125659	0.287573	0.436964	0.662138	0.843194	NS
chr1	68120240	68120618	.	open_1423	15.7343	-0.224103	0.360985	-0.620808	0.534726	0.769035	NS
chr1	68256787	68257082	.	open_1424	6.71448	0.871975	0.53469	1.6308	0.102932	0.398995	NS
chr1	68301416	68302304	.	open_1425	18.7192	1.87257	0.403769	4.63772	3.52271e-06	0.000694724	Gained
chr1	68307605	68307858	.	open_1426	7.45693	1.47197	0.593808	2.47887	0.01318	0.14741	NS
chr1	68321240	68321491	.	open_1427	12.5321	-0.567218	0.397309	-1.42765	0.153393	0.464887	NS
chr1	68331164	68331347	.	open_1428	7.39888	1.389	0.559907	2.48078	0.0131097	0.147046	NS
chr1	68342496	68343020	.	open_1429	19.434	-0.0844396	0.333847	-0.252929	0.800323	0.913842	NS
chr1	68378428	68378803	.	open_1430	6.85357	1.77153	0.579931	3.05473	0.00225265	0.0494658	Gained
chr1	68384238	68385280	.	open_1431	31.4876	1.70015	0.306819	5.54121	3.00395e-08	2.45727e-05	Gained
chr1	68443087	68443395	.	open_1432	14.0022	-0.318497	0.390821	-0.814945	0.415104	0.692689	NS
chr1	68496322	68497555	.	open_1433	210.802	-0.259724	0.11623	-2.23457	0.0254457	0.21333	NS
chr1	68568716	68568973	.	open_1434	7.44962	-0.415947	0.504984	-0.823683	0.41012	0.688674	NS
chr1	68585689	68585877	.	open_1435	4.61611	0.456882	0.645833	0.707431	0.479299	0.73488	NS
chr1	68600006	68600488	.	open_1436	16.9809	-0.111452	0.337968	-0.329771	0.741573	0.88491	NS
chr1	68723981	68724180	.	open_1437	5.19842	0.857058	0.610474	1.40392	0.160342	0.473284	NS
chr1	68819219	68819751	.	open_1438	20.943	-0.406701	0.327682	-1.24115	0.214552	0.533285	NS
chr1	68859001	68859227	.	open_1439	5.37645	-1.04542	0.603366	-1.73265	0.0831585	0.366691	NS
chr1	68973812	68974440	.	open_1440	12.4704	0.559971	0.456947	1.22546	0.220401	0.539344	NS
chr1	68994089	68994393	.	open_1441	7.20981	1.01438	0.535872	1.89294	0.0583652	0.318681	NS
chr1	69047133	69047440	.	open_1442	6.02281	-0.815781	0.593733	-1.37399	0.169446	0.48413	NS
chr1	69055292	69055842	.	open_1443	13.4631	1.42253	0.439221	3.23876	0.00120052	0.0326287	Gained
chr1	69567180	69567773	.	open_1444	23.9483	-0.0188941	0.308068	-0.0613309	0.951096	0.981011	NS
chr1	69737565	69737981	.	open_1445	15.8328	-0.448126	0.350687	-1.27785	0.201302	0.519281	NS
chr1	69782524	69782699	.	open_1446	6.73831	0.199492	0.54615	0.365269	0.714911	0.871286	NS
chr1	70043961	70044236	.	open_1447	7.04492	0.81062	0.534721	1.51597	0.129528	0.43575	NS
chr1	70045012	70045235	.	open_1448	6.18842	0.446695	0.569765	0.783998	0.433041	0.705518	NS
chr1	70101690	70102011	.	open_1449	8.04429	-0.42363	0.526517	-0.804589	0.421057	0.696966	NS
chr1	70106816	70107049	.	open_1450	5.66018	0.890236	0.608368	1.46332	0.14338	0.454065	NS
chr1	70132877	70133454	.	open_1451	17.8878	-0.674532	0.335572	-2.01009	0.0444212	0.279662	NS
chr1	70205178	70206207	.	open_1452	111.071	-0.0681753	0.159729	-0.426817	0.669513	0.84675	NS
chr1	70221084	70221951	.	open_1453	121.669	0.0141768	0.140733	0.100735	0.919761	0.968244	NS
chr1	70256915	70257373	.	open_1454	8.75693	0.153567	0.463667	0.331201	0.740493	0.884322	NS
chr1	70334221	70334571	.	open_1455	7.16224	0.680548	0.525513	1.29502	0.195315	0.513618	NS
chr1	70353674	70355074	.	open_1456	124.691	0.0283312	0.15102	0.187598	0.851191	0.937107	NS
chr1	70404883	70405127	.	open_1457	7.36601	0.750515	0.537569	1.39613	0.162676	0.475604	NS
chr1	70410591	70411615	.	open_1458	191.121	0.0190238	0.119985	0.158552	0.874022	0.94793	NS
chr1	70459864	70460215	.	open_1459	9.01052	1.32512	0.511623	2.59002	0.00959691	0.123085	NS
chr1	70486877	70488256	.	open_1460	35.6966	0.178763	0.2451	0.729349	0.465788	0.726048	NS
chr1	70495070	70495262	.	open_1461	5.34553	-1.2563	0.656609	-1.91332	0.0557073	0.312288	NS
chr1	70510072	70510316	.	open_1462	10.1199	0.527692	0.474302	1.11257	0.265895	0.581178	NS
chr1	70528552	70529008	.	open_1463	17.0263	-0.379382	0.347872	-1.09058	0.275458	0.589558	NS
chr1	70579550	70579741	.	open_1464	4.17184	-0.346104	0.695027	-0.497973	0.618503	0.817779	NS
chr1	70685298	70685742	.	open_1465	13.9525	-0.638336	0.382489	-1.6689	0.095137	0.387906	NS
chr1	70779685	70779876	.	open_1466	5.52321	0.399932	0.581406	0.68787	0.491534	0.74244	NS
chr1	70898477	70898692	.	open_1467	4.99559	0.510297	0.61167	0.83427	0.404129	0.684401	NS
chr1	71049957	71050275	.	open_1468	18.2306	-0.374514	0.353941	-1.05812	0.289999	0.602275	NS
chr1	71080554	71081441	.	open_1469	119.94	-0.267005	0.148837	-1.79395	0.0728218	0.349545	NS
chr1	71086374	71086656	.	open_1470	13.0348	2.25862	0.504005	4.48136	7.41698e-06	0.001142	Gained
chr1	71106611	71106980	.	open_1471	6.73203	-1.4812	0.575278	-2.57476	0.0100309	0.12601	NS
chr1	71200282	71200461	.	open_1472	4.46423	-1.40014	0.707918	-1.97783	0.0479479	0.29001	NS
chr1	71252786	71253065	.	open_1473	6.03882	-0.674317	0.567156	-1.18894	0.234462	0.552967	NS
chr1	71521200	71521880	.	open_1474	15.5928	-0.473708	0.366563	-1.29229	0.196255	0.514273	NS
chr1	71832228	71832454	.	open_1475	7.81962	-0.340103	0.524219	-0.648779	0.516481	0.757184	NS
chr1	72000893	72001305	.	open_1476	11.9397	0.582694	0.431814	1.34941	0.177206	0.493464	NS
chr1	72282756	72283245	.	open_1477	36.0645	0.0266796	0.264796	0.100756	0.919745	0.968244	NS
chr1	72498386	72498582	.	open_1478	4.96953	-1.04174	0.646288	-1.61188	0.106988	0.405034	NS
chr1	72623162	72623630	.	open_1479	12.5678	-0.556327	0.415928	-1.33756	0.181041	0.498441	NS
chr1	72967108	72967334	.	open_1480	5.79129	0.907475	0.585404	1.55017	0.121101	0.424757	NS
chr1	73938039	73938243	.	open_1481	5.09976	0.248684	0.618852	0.401848	0.687796	0.856669	NS
chr1	74197764	74198558	.	open_1482	98.8721	-0.07671	0.158802	-0.483055	0.629057	0.823271	NS
chr1	74246202	74246497	.	open_1483	7.18476	0.848687	0.540241	1.57094	0.116196	0.418156	NS
chr1	74266180	74266416	.	open_1484	4.87792	-1.19163	0.6582	-1.81044	0.0702281	0.34371	NS
chr1	74324636	74324878	.	open_1485	7.20939	-0.621908	0.515268	-1.20696	0.227447	0.54642	NS
chr1	74426209	74426433	.	open_1486	4.68327	1.10726	0.669703	1.65336	0.0982583	0.39281	NS
chr1	74504069	74504611	.	open_1487	21.6213	-0.49525	0.32625	-1.51801	0.129013	0.43502	NS
chr1	74505131	74505333	.	open_1488	6.52376	0.300777	0.552447	0.544444	0.586136	0.799496	NS
chr1	74550837	74551147	.	open_1489	6.01938	-1.2657	0.607927	-2.08199	0.0373436	0.257961	NS
chr1	74652866	74653118	.	open_1490	7.35657	0.735336	0.538369	1.36586	0.171984	0.487174	NS
chr1	74690025	74690291	.	open_1491	9.92296	0.295099	0.438242	0.673371	0.500711	0.747858	NS
chr1	74693559	74693755	.	open_1492	8.72771	2.61396	0.662059	3.94823	7.87304e-05	0.00553354	Gained
chr1	74732664	74734135	.	open_1493	183.41	-0.126585	0.139447	-0.907771	0.363999	0.656236	NS
chr1	74782476	74782776	.	open_1494	8.14549	-0.738997	0.496412	-1.48868	0.136573	0.445987	NS
chr1	74811670	74812129	.	open_1495	10.0496	-0.925651	0.456253	-2.02881	0.0424774	0.273986	NS
chr1	74860434	74860682	.	open_1496	4.75794	-1.74843	0.728525	-2.39996	0.0163967	0.167181	NS
chr1	75084135	75084338	.	open_1497	6.02308	1.67749	0.629923	2.66301	0.00774456	0.107352	NS
chr1	75203606	75203920	.	open_1498	20.7679	-0.211834	0.321805	-0.658267	0.510367	0.753232	NS
chr1	75233258	75233519	.	open_1499	11.5583	-0.306423	0.404592	-0.757362	0.448833	0.715719	NS
chr1	75265673	75266144	.	open_1500	13.4018	-0.417816	0.389963	-1.07142	0.283979	0.59709	NS
chr1	75461772	75462013	.	open_1501	5.02681	0.727317	0.630115	1.15426	0.248393	0.566463	NS
chr1	75614663	75615299	.	open_1502	45.2042	-0.565185	0.242561	-2.33008	0.0198022	0.186334	NS
chr1	75632485	75632768	.	open_1503	14.1022	-0.237112	0.376007	-0.630605	0.528299	0.76493	NS
chr1	75672637	75673268	.	open_1504	20.6592	1.83092	0.373144	4.90673	9.26051e-07	0.000261843	Gained
chr1	75724211	75724997	.	open_1505	125.787	-0.0822325	0.147397	-0.5579	0.576913	0.794231	NS
chr1	75785668	75786594	.	open_1506	101.443	-0.115009	0.158452	-0.725828	0.467944	0.727281	NS
chr1	75796746	75797766	.	open_1507	26.6287	-0.401256	0.294477	-1.36261	0.173007	0.488562	NS
chr1	75842663	75842908	.	open_1508	10.3444	-0.446483	0.435015	-1.02636	0.30472	0.61392	NS
chr1	75861755	75861967	.	open_1509	7.75622	0.145248	0.486113	0.298794	0.765097	0.896385	NS
chr1	75874414	75874621	.	open_1510	7.00714	-0.884391	0.561899	-1.57393	0.115503	0.417253	NS
chr1	75908774	75909356	.	open_1511	16.9934	-0.750923	0.36119	-2.07903	0.0376148	0.258658	NS
chr1	76044036	76044422	.	open_1512	7.92103	0.791377	0.508748	1.55554	0.119818	0.423163	NS
chr1	76053297	76053505	.	open_1513	6.05625	0.297831	0.565608	0.526568	0.598493	0.806744	NS
chr1	76074485	76074950	.	open_1514	17.4392	-0.0530873	0.35576	-0.149222	0.881378	0.951005	NS
chr1	76122227	76122450	.	open_1515	5.74051	-0.110684	0.567015	-0.195204	0.845233	0.934675	NS
chr1	76137029	76137303	.	open_1516	5.16283	0.795058	0.621666	1.27891	0.200927	0.51889	NS
chr1	76154213	76154732	.	open_1517	19.4522	-0.212384	0.330298	-0.643006	0.52022	0.759605	NS
chr1	76184758	76184975	.	open_1518	4.5533	1.16498	0.678684	1.71652	0.0860661	0.372558	NS
chr1	76300352	76300546	.	open_1519	4.63169	-1.17112	0.69785	-1.67819	0.0933103	0.385119	NS
chr1	76330867	76331691	.	open_1520	18.0668	-0.619027	0.333197	-1.85784	0.0631916	0.329834	NS
chr1	76497814	76498057	.	open_1521	6.64942	0.223735	0.533694	0.419219	0.675056	0.849879	NS
chr1	76764886	76765154	.	open_1522	8.37593	0.617859	0.481402	1.28346	0.199332	0.517413	NS
chr1	76862558	76862899	.	open_1523	9.62225	1.06323	0.50776	2.09396	0.0362638	0.254422	NS
chr1	76863032	76863228	.	open_1524	6.03834	-0.700153	0.593763	-1.17918	0.238326	0.556873	NS
chr1	76867799	76869066	.	open_1525	40.7672	-0.85325	0.238584	-3.57631	0.000348485	0.0146911	Lost
chr1	76879384	76879677	.	open_1526	7.1837	0.824024	0.538898	1.52909	0.126242	0.431472	NS
chr1	76949571	76949759	.	open_1527	7.23218	0.594959	0.516318	1.15231	0.249193	0.566958	NS
chr1	77018060	77018365	.	open_1528	5.79507	-1.21747	0.598317	-2.03482	0.0418691	0.272003	NS
chr1	77039823	77040049	.	open_1529	7.41117	2.06427	0.614481	3.35937	0.000781193	0.0245293	Gained
chr1	77056755	77056965	.	open_1530	5.48926	0.566915	0.599717	0.945303	0.344504	0.641926	NS
chr1	77126383	77126665	.	open_1531	12.6645	-0.22812	0.400226	-0.569978	0.568692	0.789352	NS
chr1	77218749	77219577	.	open_1532	63.3612	-0.161886	0.204552	-0.79142	0.428699	0.702635	NS
chr1	77282223	77282631	.	open_1533	13.763	-0.254217	0.413002	-0.615534	0.538202	0.771035	NS
chr1	77292254	77292458	.	open_1534	4.91939	-0.208346	0.642923	-0.32406	0.745893	0.887142	NS
chr1	77307929	77308187	.	open_1535	6.61056	0.536838	0.560434	0.957897	0.338115	0.637879	NS
chr1	77313515	77313945	.	open_1536	17.3776	-0.624336	0.338329	-1.84535	0.064986	0.333208	NS
chr1	77322154	77322651	.	open_1537	12.9409	1.85271	0.470261	3.93976	8.15637e-05	0.00562219	Gained
chr1	77363569	77363793	.	open_1538	6.27871	-0.700389	0.565138	-1.23932	0.215226	0.533901	NS
chr1	77384902	77385199	.	open_1539	6.59499	0.515356	0.565243	0.911741	0.361905	0.654756	NS
chr1	77412448	77412708	.	open_1540	6.33569	1.52994	0.608047	2.51616	0.0118641	0.139451	NS
chr1	77473881	77474374	.	open_1541	10.7766	1.03817	0.45414	2.28601	0.0222535	0.198535	NS
chr1	77514878	77515190	.	open_1542	12.6979	0.147249	0.39127	0.376337	0.706667	0.867429	NS
chr1	77539332	77540033	.	open_1543	26.394	1.50505	0.30889	4.87243	1.10236e-06	0.000297342	Gained
chr1	77605152	77605891	.	open_1544	22.5412	1.09889	0.328723	3.34291	0.000829043	0.0254338	Gained
chr1	77682212	77683866	.	open_1545	326.088	0.0908173	0.115535	0.78606	0.431833	0.704755	NS
chr1	77759149	77760153	.	open_1546	78.0095	-0.183598	0.191852	-0.956974	0.33858	0.638101	NS
chr1	77779515	77780210	.	open_1547	67.7491	-0.105874	0.187537	-0.564547	0.572382	0.791434	NS
chr1	77832947	77833172	.	open_1548	9.92016	0.5543	0.480807	1.15285	0.248971	0.56685	NS
chr1	77888155	77889833	.	open_1549	74.3907	-0.0954231	0.193485	-0.49318	0.621885	0.819494	NS
chr1	77900327	77900945	.	open_1550	16.87	-0.32408	0.341378	-0.949329	0.342453	0.640701	NS
chr1	77978215	77980083	.	open_1551	262.495	-0.0336064	0.124401	-0.270146	0.787048	0.906927	NS
chr1	78004287	78005326	.	open_1552	84.9738	-0.16875	0.176387	-0.956703	0.338717	0.638293	NS
chr1	78068898	78069098	.	open_1553	6.89795	-0.352537	0.52824	-0.667381	0.504529	0.750052	NS
chr1	78079304	78079485	.	open_1554	4.74791	-1.29631	0.679153	-1.90872	0.0562988	0.313365	NS
chr1	78101639	78101847	.	open_1555	9.26117	2.27732	0.548791	4.1497	3.3291e-05	0.0030697	Gained
chr1	78114118	78114846	.	open_1556	27.7335	-0.185706	0.270143	-0.687434	0.49181	0.742571	NS
chr1	78145154	78145471	.	open_1557	17.8811	-0.087087	0.330283	-0.263674	0.792031	0.909681	NS
chr1	78153289	78154075	.	open_1558	14.3461	0.570202	0.37762	1.50999	0.131046	0.437996	NS
chr1	78166908	78167132	.	open_1559	4.6067	1.03939	0.667219	1.5578	0.119281	0.422336	NS
chr1	78268235	78268555	.	open_1560	6.88657	0.843527	0.584803	1.44241	0.149186	0.460384	NS
chr1	78279985	78280181	.	open_1561	4.20731	-0.831604	0.756599	-1.09913	0.271709	0.586484	NS
chr1	78287371	78287616	.	open_1562	4.77603	1.05158	0.648204	1.6223	0.104738	0.401775	NS
chr1	78397986	78398226	.	open_1563	5.74565	0.677636	0.587569	1.15329	0.248792	0.566759	NS
chr1	78490791	78491553	.	open_1564	18.1775	-0.381167	0.354342	-1.0757	0.28206	0.595387	NS
chr1	78607912	78608295	.	open_1565	9.30702	0.519309	0.474896	1.09352	0.274165	0.588165	NS
chr1	78617406	78618045	.	open_1566	27.8031	-0.419821	0.306256	-1.37082	0.170432	0.485375	NS
chr1	78619523	78620074	.	open_1567	15.1387	0.423008	0.357769	1.18235	0.237068	0.555741	NS
chr1	78678613	78678910	.	open_1568	8.29787	0.343004	0.510998	0.671244	0.502065	0.748601	NS
chr1	78735611	78735843	.	open_1569	5.22344	0.761378	0.65175	1.16821	0.242723	0.561175	NS
chr1	78840983	78841267	.	open_1570	7.7737	0.368955	0.497454	0.741686	0.458277	0.721862	NS
chr1	79008060	79008254	.	open_1571	4.13734	0.891635	0.693762	1.28522	0.198716	0.516741	NS
chr1	79026586	79026851	.	open_1572	5.26867	0.387938	0.609717	0.636259	0.524608	0.762563	NS
chr1	79045060	79045728	.	open_1573	21.2006	0.118413	0.309387	0.382733	0.701918	0.864738	NS
chr1	79068288	79068540	.	open_1574	6.31638	-0.44023	0.552229	-0.797186	0.425343	0.699804	NS
chr1	79259868	79260098	.	open_1575	11.3863	-0.0822626	0.414496	-0.198464	0.842682	0.933586	NS
chr1	79281898	79282151	.	open_1576	5.94459	0.885272	0.605326	1.46247	0.143612	0.454261	NS
chr1	79323192	79323761	.	open_1577	13.0462	1.14584	0.439567	2.60673	0.00914101	0.119297	NS
chr1	79353225	79353499	.	open_1578	11.8053	-0.647232	0.412384	-1.56949	0.116534	0.418719	NS
chr1	79355314	79355501	.	open_1579	6.25539	0.226696	0.552139	0.410577	0.681383	0.853145	NS
chr1	79468006	79468244	.	open_1580	7.40513	0.511315	0.519477	0.984288	0.324974	0.628962	NS
chr1	79497174	79497409	.	open_1581	9.46914	-0.598785	0.463409	-1.29213	0.196312	0.51429	NS
chr1	80054222	80054444	.	open_1582	9.04669	1.18718	0.485067	2.44746	0.0143868	0.155008	NS
chr1	80059629	80059896	.	open_1583	6.51858	-0.797323	0.563509	-1.41492	0.157091	0.469876	NS
chr1	80064429	80064794	.	open_1584	8.37562	0.906533	0.509328	1.77986	0.0750989	0.353495	NS
chr1	80217477	80218397	.	open_1585	25.5077	-0.384778	0.281756	-1.36564	0.172051	0.487229	NS
chr1	80375700	80375884	.	open_1586	8.42928	1.92774	0.592939	3.25116	0.00114936	0.0316598	Gained
chr1	80439985	80440188	.	open_1587	4.69306	-0.426963	0.653158	-0.653689	0.513312	0.755075	NS
chr1	80445054	80445270	.	open_1588	5.73269	0.611067	0.5916	1.03291	0.301648	0.610984	NS
chr1	80713555	80713753	.	open_1589	6.21071	-0.385521	0.588068	-0.655571	0.5121	0.75434	NS
chr1	80995006	80995231	.	open_1590	6.3944	1.08526	0.561389	1.93317	0.0532153	0.305326	NS
chr1	81174833	81175338	.	open_1591	16.3725	1.98251	0.43748	4.53165	5.85239e-06	0.000972403	Gained
chr1	81179293	81179520	.	open_1592	7.71918	2.08481	0.594738	3.50542	0.000455882	0.0175341	Gained
chr1	81305999	81306543	.	open_1593	26.1262	-0.191937	0.276486	-0.6942	0.487557	0.740335	NS
chr1	81349286	81349573	.	open_1594	7.65697	0.225983	0.497261	0.454455	0.649502	0.835979	NS
chr1	81375018	81375222	.	open_1595	4.25883	1.21273	0.686586	1.76631	0.0773431	0.3575	NS
chr1	81390902	81391403	.	open_1596	13.3738	-0.0971246	0.393607	-0.246756	0.805097	0.916034	NS
chr1	81414349	81414754	.	open_1597	17.6588	-0.0456328	0.338303	-0.134888	0.892701	0.955947	NS
chr1	81549185	81549821	.	open_1598	21.2429	0.065523	0.308721	0.21224	0.83192	0.929097	NS
chr1	81577079	81577328	.	open_1599	9.48529	-0.335801	0.456701	-0.735275	0.462172	0.723861	NS
chr1	81582632	81582958	.	open_1600	18.1284	-0.598251	0.36265	-1.64966	0.099012	0.39389	NS
chr1	81599120	81599331	.	open_1601	6.38988	-0.889202	0.565857	-1.57142	0.116084	0.418038	NS
chr1	81625872	81626124	.	open_1602	9.1442	-0.249999	0.4563	-0.547882	0.583773	0.798297	NS
chr1	81681543	81681908	.	open_1603	10.7676	0.93408	0.436565	2.13961	0.032386	0.241456	NS
chr1	81682430	81682827	.	open_1604	19.2778	0.87043	0.361823	2.40568	0.0161425	0.16583	NS
chr1	81695766	81695965	.	open_1605	5.68725	1.38124	0.632523	2.18369	0.0289849	0.227828	NS
chr1	81699326	81700061	.	open_1606	37.9255	-0.0841413	0.238019	-0.353506	0.723709	0.875539	NS
chr1	81700807	81701031	.	open_1607	11.0728	-0.336312	0.433043	-0.776626	0.43738	0.708145	NS
chr1	81703016	81703264	.	open_1608	10.3838	0.808129	0.470392	1.71799	0.0857983	0.371942	NS
chr1	81707030	81707388	.	open_1609	15.5571	0.195691	0.351989	0.555956	0.578241	0.794978	NS
chr1	81731928	81732271	.	open_1610	12.7436	0.892869	0.410048	2.17748	0.029445	0.229907	NS
chr1	81757523	81757771	.	open_1611	6.88481	0.0603923	0.523871	0.115281	0.908223	0.963374	NS
chr1	81757921	81758726	.	open_1612	22.1187	-0.297385	0.310441	-0.957944	0.338091	0.637879	NS
chr1	81773894	81774193	.	open_1613	7.56349	-0.484982	0.506292	-0.957909	0.338109	0.637879	NS
chr1	81800363	81800918	.	open_1614	42.2463	-0.196928	0.222003	-0.887048	0.375053	0.664006	NS
chr1	81801135	81801636	.	open_1615	38.9568	0.0209084	0.233599	0.0895056	0.92868	0.971888	NS
chr1	81802789	81803720	.	open_1616	69.1061	-0.168301	0.176933	-0.951212	0.341497	0.640194	NS
chr1	81808808	81809026	.	open_1617	10.2751	-0.602469	0.472755	-1.27438	0.202529	0.520207	NS
chr1	81818842	81819251	.	open_1618	10.9354	-0.912085	0.433532	-2.10385	0.0353917	0.252136	NS
chr1	81835057	81835981	.	open_1619	29.3977	-0.0404224	0.26825	-0.150689	0.880221	0.950517	NS
chr1	81836194	81836401	.	open_1620	6.14643	-0.542937	0.572393	-0.94854	0.342855	0.640992	NS
chr1	81841808	81842127	.	open_1621	9.58702	-0.293738	0.459756	-0.638899	0.522888	0.761222	NS
chr1	81876724	81877565	.	open_1622	20.0077	0.252977	0.311002	0.813426	0.415974	0.693322	NS
chr1	81898134	81898327	.	open_1623	4.46739	-1.54646	0.748581	-2.06585	0.0388422	0.262908	NS
chr1	81924245	81924447	.	open_1624	6.77107	-0.562904	0.561875	-1.00183	0.316425	0.622795	NS
chr1	81990472	81990812	.	open_1625	8.23645	1.48996	0.515334	2.89125	0.00383708	0.0689987	Gained
chr1	82015121	82015911	.	open_1626	17.7635	-0.563797	0.347498	-1.62245	0.104707	0.401775	NS
chr1	82086729	82086966	.	open_1627	5.97347	1.48001	0.607259	2.4372	0.0148017	0.157652	NS
chr1	82386108	82386395	.	open_1628	6.57255	0.130505	0.529612	0.246416	0.80536	0.916169	NS
chr1	82447102	82447302	.	open_1629	12.5674	-0.0756888	0.391097	-0.19353	0.846544	0.935188	NS
chr1	82463927	82465357	.	open_1630	61.7728	-0.150917	0.207003	-0.729057	0.465967	0.726145	NS
chr1	82485622	82486109	.	open_1631	18.8531	0.264684	0.322541	0.820622	0.411862	0.690236	NS
chr1	82504017	82504803	.	open_1632	24.8813	0.305704	0.291815	1.0476	0.294825	0.606114	NS
chr1	82517656	82517852	.	open_1633	9.40432	0.442456	0.454153	0.974245	0.329935	0.632346	NS
chr1	82565199	82565921	.	open_1634	68.8778	0.3494	0.182135	1.91836	0.0550658	0.310389	NS
chr1	82580097	82580277	.	open_1635	8.57661	-0.72514	0.493997	-1.46791	0.14213	0.45263	NS
chr1	82595968	82596489	.	open_1636	60.343	-0.215696	0.1905	-1.13226	0.257525	0.574259	NS
chr1	82597692	82598290	.	open_1637	49.6361	0.0802464	0.205664	0.390183	0.696402	0.861812	NS
chr1	82604399	82604756	.	open_1638	14.0376	-0.0585235	0.376388	-0.155487	0.876437	0.949046	NS
chr1	82656025	82656789	.	open_1639	30.8991	-0.0223782	0.279366	-0.0801034	0.936155	0.975027	NS
chr1	82657183	82657617	.	open_1640	16.4672	0.17678	0.372491	0.47459	0.63508	0.827143	NS
chr1	82662203	82662481	.	open_1641	9.68184	-0.650196	0.448243	-1.45054	0.146907	0.457942	NS
chr1	82662931	82663119	.	open_1642	6.39958	-0.427165	0.562346	-0.759614	0.447486	0.714705	NS
chr1	82698056	82698412	.	open_1643	14.6488	0.09112	0.359281	0.253618	0.799791	0.913525	NS
chr1	82700425	82700932	.	open_1644	25.9066	0.280631	0.285206	0.983957	0.325136	0.629052	NS
chr1	82785317	82785637	.	open_1645	23.0175	-0.157247	0.298086	-0.527522	0.597831	0.806243	NS
chr1	82786990	82787721	.	open_1646	40.9889	-0.11167	0.223738	-0.499111	0.617701	0.817479	NS
chr1	82800926	82801352	.	open_1647	14.198	-0.541036	0.36912	-1.46575	0.142717	0.453395	NS
chr1	82801364	82801782	.	open_1648	14.7884	-0.0687293	0.360107	-0.190858	0.848637	0.936057	NS
chr1	82812766	82813091	.	open_1649	18.0615	-0.123718	0.326417	-0.379017	0.704675	0.866219	NS
chr1	82817775	82818335	.	open_1650	39.4376	-0.394765	0.237484	-1.66228	0.0964574	0.390162	NS
chr1	82818642	82819066	.	open_1651	33.5233	5.84394e-05	0.250292	0.000233485	0.999814	0.999846	NS
chr1	82819239	82819775	.	open_1652	41.0595	0.0809509	0.224857	0.36001	0.718839	0.873248	NS
chr1	82824041	82824222	.	open_1653	21.3372	-0.321264	0.314495	-1.02152	0.307008	0.615695	NS
chr1	82829559	82829825	.	open_1654	27.7887	-0.585724	0.270339	-2.16663	0.0302629	0.233204	NS
chr1	82830848	82831714	.	open_1655	73.3877	0.100206	0.201807	0.496544	0.61951	0.818315	NS
chr1	82837812	82838868	.	open_1656	99.1286	-0.107094	0.157663	-0.679258	0.496974	0.745617	NS
chr1	82845175	82845757	.	open_1657	16.646	0.269735	0.346451	0.778564	0.436236	0.707452	NS
chr1	82919884	82920160	.	open_1658	16.6896	-0.104395	0.363173	-0.287454	0.773765	0.900472	NS
chr1	82920437	82921633	.	open_1659	64.396	-0.0513107	0.193753	-0.264825	0.791144	0.909092	NS
chr1	82978796	82979154	.	open_1660	11.7258	-0.614886	0.427171	-1.43944	0.150026	0.461416	NS
chr1	82984853	82985203	.	open_1661	22.022	-0.039955	0.301914	-0.132339	0.894716	0.956656	NS
chr1	82986474	82987372	.	open_1662	70.0001	-0.252789	0.192748	-1.3115	0.189689	0.507365	NS
chr1	82994880	82996196	.	open_1663	105.902	-0.143362	0.165057	-0.868559	0.385089	0.671284	NS
chr1	83053509	83053696	.	open_1664	4.46106	1.09227	0.663663	1.64582	0.0998012	0.395037	NS
chr1	83526153	83526363	.	open_1665	5.96281	0.252995	0.574428	0.440429	0.659626	0.841613	NS
chr1	83644982	83645167	.	open_1666	4.47628	-0.848015	0.724569	-1.17037	0.241852	0.560358	NS
chr1	83744112	83744313	.	open_1667	6.42786	-0.473504	0.566065	-0.836483	0.402883	0.683457	NS
chr1	83760820	83761065	.	open_1668	7.66095	0.772986	0.499366	1.54793	0.121638	0.425717	NS
chr1	83849281	83849556	.	open_1669	8.06351	0.230408	0.51754	0.445199	0.656176	0.83984	NS
chr1	83860508	83861105	.	open_1670	34.6103	-0.350218	0.242427	-1.44463	0.148561	0.459763	NS
chr1	83931624	83931922	.	open_1671	13.1817	0.0496847	0.394224	0.126032	0.899707	0.959043	NS
chr1	83998429	83999569	.	open_1672	94.1824	-0.0317369	0.159102	-0.199475	0.841891	0.933274	NS
chr1	84077459	84078802	.	open_1673	118.538	0.0742907	0.140333	0.529387	0.596537	0.805448	NS
chr1	84089487	84089707	.	open_1674	8.4833	1.56017	0.521636	2.99091	0.00278147	0.0566365	Gained
chr1	84090583	84090761	.	open_1675	5.81568	0.585345	0.587506	0.996321	0.319094	0.624844	NS
chr1	84103467	84103859	.	open_1676	11.7706	1.20817	0.435733	2.77273	0.00555886	0.0873988	Gained
chr1	84174146	84174522	.	open_1677	10.1573	0.740259	0.439684	1.68361	0.0922564	0.383422	NS
chr1	84253132	84253321	.	open_1678	6.53236	0.252584	0.56065	0.450519	0.652336	0.837727	NS
chr1	84253942	84254255	.	open_1679	14.7145	1.55223	0.442331	3.5092	0.000449463	0.0174354	Gained
chr1	84298439	84299289	.	open_1680	29.5513	-0.27186	0.261612	-1.03917	0.298724	0.609036	NS
chr1	84365342	84366109	.	open_1681	25.1598	1.29179	0.355207	3.63673	0.000276124	0.012595	Gained
chr1	84479173	84479957	.	open_1682	62.5795	-0.239186	0.188648	-1.2679	0.204834	0.522679	NS
chr1	84493858	84494241	.	open_1683	8.51479	-0.442291	0.475879	-0.929419	0.352672	0.648522	NS
chr1	84505431	84506822	.	open_1684	210.366	0.0215994	0.116271	0.185768	0.852626	0.937861	NS
chr1	84573802	84574761	.	open_1685	66.5361	0.0389926	0.184304	0.211566	0.832445	0.9293	NS
chr1	84620611	84621196	.	open_1686	57.6286	-0.340485	0.198277	-1.71722	0.0859389	0.372266	NS
chr1	84689871	84691043	.	open_1687	223.734	0.0527601	0.112236	0.470083	0.638295	0.829152	NS
chr1	84698753	84699045	.	open_1688	7.85189	0.700793	0.502221	1.39539	0.162899	0.475757	NS
chr1	84753293	84753765	.	open_1689	15.9647	-0.455047	0.355056	-1.28162	0.199976	0.517942	NS
chr1	84772132	84773129	.	open_1690	24.4775	-0.133809	0.297588	-0.449645	0.652966	0.838022	NS
chr1	84785648	84785890	.	open_1691	5.73616	-1.27243	0.616876	-2.0627	0.0391407	0.264051	NS
chr1	84823998	84824342	.	open_1692	9.22481	0.404296	0.455215	0.888143	0.374464	0.663541	NS
chr1	84834233	84834801	.	open_1693	14.6318	1.32961	0.391496	3.39623	0.000683213	0.0225833	Gained
chr1	84847328	84847531	.	open_1694	9.8908	1.48366	0.538165	2.75689	0.00583545	0.0897323	Gained
chr1	84854371	84854641	.	open_1695	7.4214	1.06372	0.523627	2.03144	0.04221	0.273311	NS
chr1	84923384	84923563	.	open_1696	4.85281	0.423734	0.626873	0.675949	0.499073	0.746924	NS
chr1	84936298	84936487	.	open_1697	11.5764	-0.212472	0.407036	-0.521997	0.601672	0.808702	NS
chr1	84944795	84945379	.	open_1698	32.696	-0.352896	0.24679	-1.42994	0.152734	0.464391	NS
chr1	84974089	84974277	.	open_1699	4.81663	-0.949622	0.642829	-1.47725	0.139607	0.449503	NS
chr1	85109438	85109643	.	open_1700	16.3237	-0.41253	0.34531	-1.19467	0.232217	0.550431	NS
chr1	85200417	85201879	.	open_1701	154.791	-0.0189758	0.134445	-0.141142	0.887758	0.953578	NS
chr1	85230510	85230855	.	open_1702	10.6595	-0.212805	0.444584	-0.478662	0.632179	0.825298	NS
chr1	85259007	85260168	.	open_1703	94.8965	0.033351	0.162943	0.204678	0.837823	0.931699	NS
chr1	85276143	85277168	.	open_1704	274.345	0.12506	0.115257	1.08505	0.277899	0.591573	NS
chr1	85298181	85298495	.	open_1705	9.33277	1.26716	0.497442	2.54734	0.0108547	0.132027	NS
chr1	85308081	85308790	.	open_1706	35.9067	-0.291891	0.240732	-1.21251	0.225316	0.54459	NS
chr1	85314032	85314630	.	open_1707	15.725	0.927084	0.365384	2.53729	0.0111715	0.133988	NS
chr1	85329040	85329315	.	open_1708	13.6661	1.6505	0.456364	3.61664	0.000298451	0.0131993	Gained
chr1	85330271	85330611	.	open_1709	8.6922	1.11441	0.502512	2.21768	0.0265764	0.21757	NS
chr1	85451357	85451720	.	open_1710	10.0479	0.326989	0.449407	0.727601	0.466858	0.726552	NS
chr1	85464283	85465642	.	open_1711	77.4893	-0.0444864	0.176163	-0.25253	0.800631	0.91401	NS
chr1	85495539	85495941	.	open_1712	12.3303	1.42263	0.460336	3.09042	0.00199873	0.04584	Gained
chr1	85502634	85503024	.	open_1713	14.5164	-0.119108	0.365557	-0.325827	0.744555	0.886495	NS
chr1	85550718	85551679	.	open_1714	27.1991	1.28729	0.317824	4.05032	5.11469e-05	0.00412806	Gained
chr1	85569160	85569402	.	open_1715	6.06435	1.04303	0.595818	1.75058	0.0800182	0.361209	NS
chr1	85580445	85581476	.	open_1716	243.068	0.0733637	0.128791	0.569631	0.568928	0.789517	NS
chr1	85588103	85588296	.	open_1717	7.95457	-0.811272	0.497738	-1.62992	0.103119	0.399325	NS
chr1	85607057	85607612	.	open_1718	26.1914	1.85138	0.322388	5.74271	9.31732e-09	1.0216e-05	Gained
chr1	85611976	85612209	.	open_1719	11.8279	2.30125	0.49298	4.66803	3.04102e-06	0.000637979	Gained
chr1	85612784	85613259	.	open_1720	15.6152	0.907615	0.420597	2.15792	0.030934	0.235916	NS
chr1	85622720	85623415	.	open_1721	16.4243	1.855	0.408824	4.53741	5.69501e-06	0.000953883	Gained
chr1	85683810	85684112	.	open_1722	6.8233	-1.12328	0.553678	-2.02877	0.0424821	0.273986	NS
chr1	85707545	85708682	.	open_1723	84.8016	0.251839	0.162186	1.55278	0.120476	0.424018	NS
chr1	85911764	85911974	.	open_1724	7.91525	-0.430096	0.493305	-0.871866	0.383282	0.670044	NS
chr1	85942847	85943256	.	open_1725	9.07338	0.249858	0.457188	0.546509	0.584716	0.798888	NS
chr1	86009405	86009618	.	open_1726	6.18838	0.714618	0.570715	1.25215	0.210517	0.528923	NS
chr1	86018111	86018498	.	open_1727	10.0191	-0.735158	0.445899	-1.64871	0.0992067	0.39404	NS
chr1	86185750	86186022	.	open_1728	7.6981	-0.337527	0.492123	-0.685858	0.492802	0.743241	NS
chr1	86187125	86187323	.	open_1729	4.74212	0.531393	0.636071	0.83543	0.403475	0.683948	NS
[truncated: 60,579 more rows]
