# Supplementary material for: Re-expression of SMARCA4/BRG1 in small cell carcinoma of ovary, hypercalcemic type (SCCOHT) promotes an epithelial-like gene signature through an AP-1-dependent mechanism
Source: eLife. 2020 Dec 23;9:e59073. doi: 10.7554/eLife.59073 (PMC7813545; doi:10.7554/eLife.59073)
Supplement: Figure 2—source data 1. [file elife-59073-fig2-data1.xlsx]

## Sheet: README
Orlando et al eLife
Figure 2 - Source Data File 1
A = Figure 2A: BIN67 xCell Results
B = Figure 2D: xCell Epithelial + CD44 genes - All SCCOHT Cell Lines, Heatmap of Log2FoldChange RNAseq (BRG1/Control)
C = Figure 2E: Known Epithelial Markers - All SCCOHT Cell Lines, Heatmap of Log2FoldChange RNAseq (BRG1/Control)
D = Figure 2F: Curated Epithelial Signature Gene Set (n = 171 unique genes)
E = Figure 2G: SingScore Results for Epithelial Signature Enrichment in BIN67, SCCOHT-1, COV434 RNAseq data
F = Figure 2H: Epithelial Signature identified in BIN67 Proteomics and RNA-seq data

## Sheet: A- xCell BIN67 Results Orlando
	BIN67_BRG1_1	BIN67_BRG1_2	BIN67_BRG1_3	BIN67_BRG1_4	BIN67_CTRL_1	BIN67_CTRL_2	BIN67_CTRL_3	BIN67_CTRL_4
Adipocytes	0	0	0	0	0	0	0	0
Astrocytes	0.0125	0.0148	0.0095	0.0086	0	0	0	0
B-cells	0.0022	0	0	0	0.001	0.0044	0.0016	0.0101
Basophils	0.0008	0.0075	0	0	0.0345	0.0184	0.0169	0.0092
CD4+ T-cells	0	0	0	0	0	0	0	0
CD4+ Tcm	0.0011	0.0012	0	0	0	0	0	0
CD4+ Tem	0.0005	0	0	0.0011	0	0	0.0109	0.0004
CD4+ memory T-cells	0	0	0	0	0	0.0002	0	0.0011
CD4+ naive T-cells	0.0044	0.0001	0	0	0	0	0	0.0039
CD8+ T-cells	0.0032	0	0.0002	0	0.004	0.011	0.0079	0.0091
CD8+ Tcm	0	0	0	0	0	0	0	0
CD8+ Tem	0	0	0	0	0	0	0	0
CD8+ naive T-cells	0	0.0002	0.0014	0.002	0.0043	0.0041	0.0004	0.0005
CLP	0	0	0.0015	0.0019	0.0037	0.0014	0	0
CMP	0.0003	0	0	0	0	0.0007	0	0.0035
Chondrocytes	0	0	0	0	0	0	0	0
Class-switched memory B-cells	0	0	0	0	0	0	0	0
DC	0.0003	0.0001	0.0001	0	0	0	0	0
Endothelial cells	0	0	0	0	0	0	0	0
Eosinophils	0.0003	0	0	0	0	0	0	0
Epithelial cells	0.0372	0.0547	0.0692	0.0674	0	0	0	0
Erythrocytes	0	0	0	0	0	0	0	0
Fibroblasts	0.0011	0	0	0	0	0	0	0.0063
GMP	0	0	0	0	0	0	0	0
HSC	0	0	0.0016	0	0.0007	0	0	0
Hepatocytes	0	0	0	0	0	0	0	0
Keratinocytes	0.0122	0.0159	0.0255	0.0228	0	0	0	0
MEP	0	0	0.0006	0.0029	0.0291	0.019	0.0198	0.0121
MPP	0	0	0	0	0	0	0	0
MSC	0	0	0	0	0.0498	0.0583	0.0655	0.0363
Macrophages	0	0	0.0004	0.0008	0	0	0	0
Macrophages M1	0	0	0	0	0	0	0	0
Macrophages M2	0	0.0005	0.0018	0.0028	0	0	0	0
Mast cells	0.0001	0	0	0	0	0.0007	0.0001	0.0001
Megakaryocytes	0.0005	0.0007	0.0018	0.0015	0	0	0	0
Melanocytes	0.0001	0	0	0	0.0003	0.0003	0.0004	0.0002
Memory B-cells	0	0	0	0	0	0	0	0
Mesangial cells	0.0203	0.033	0.0254	0.0274	0	0	0	0
Monocytes	0	0	0	0	0	0	0	0
Myocytes	0.0022	0.0054	0.0045	0.0085	0	0	0	0
NK cells	0	0	0	0	0	0	0	0
NKT	0.0008	0	0	0	0	0	0.0074	0.0032
Neurons	0.0004	0	0	0	0.0021	0.0026	0.0028	0.0033
Neutrophils	0	0	0	0	0	0	0	0
Osteoblast	0	0	0	0	0.0123	0.0013	0.01	0.0042
Pericytes	0	0	0	0	0	0	0	0
Plasma cells	0	0	0	0	0.0055	0.0058	0.0031	0.0009
Platelets	0	0	0	0	0	0	0	0
Preadipocytes	0.0012	0	0	0	0.0256	0.0265	0.0113	0.0147
Sebocytes	0.0009	0.001	0.0023	0.0025	0	0	0	0
Skeletal muscle	0	0	0	0	0	0	0	0
Smooth muscle	0	0	0.0104	0.0107	0.0198	0.0087	0	0.0008
Tgd cells	0	0	0	0	0.003	0.0061	0	0.0072
Th1 cells	0.0004	0	0	0.0003	0.0276	0.0146	0.0401	0.0239
Th2 cells	0	0	0	0.0001	0.0488	0.0489	0.0224	0.0377
Tregs	0	0	0	0	0	0	0	0
aDC	0.0159	0.0131	0.015	0.0119	0	0	0	0
cDC	0.0019	0.0015	0.0013	0.0003	0	0	0	0
iDC	0.0023	0.0025	0.0025	0.0034	0	0	0	0
ly Endothelial cells	0	0	0	0	0	0	0	0
mv Endothelial cells	0	0	0	0	0	0	0	0
naive B-cells	0.0009	0.0016	0.0014	0.002	0	0	0	0
pDC	0	0	0	0.0002	0	0.0011	0	0
pro B-cells	0.0005	0	0	0	0.0147	0.0124	0.0114	0.0139
ImmuneScore	0.0041	0.0001	0.0005	0.0005	0.0033	0.0107	0.0064	0.0129
StromaScore	0.0006	0	0	0	0	0	0	0.0032
MicroenvironmentScore	0.0046	0.0001	0.0005	0.0005	0.0033	0.0107	0.0064	0.016

## Sheet: B- xCellGenes l2fc SCCOHT
Gene	Category	BIN67	COV434	SCCOHT1
SFN	Epithelial cells	5.38675	5.51956	2.7221
TACSTD2	Epithelial cells	3.61649	5.42272	4.37951
PRSS8	Epithelial cells	5.83009	-1.84358	1.48672
AP1M2	Epithelial cells	0.303287	1.20393	3.89725
B3GNT3	Epithelial cells	2.17198	-0.0890969	-1.76273
CBLC	Epithelial cells	-0.949856	-1.57989	-0.0539941
HES2	Epithelial cells	-0.432682	0.353601	0.481952
RAB25	Epithelial cells	-0.0617554	2.02575	-0.178058
S100A14	Epithelial cells	8.48594	4.06372	6.67496
FLNB	Epithelial cells	2.6654	2.10964	2.1657
GRB7	Epithelial cells	1.75663	1.1442	0.0140355
LAD1	Epithelial cells	5.2888	2.33314	5.61173
LAMA5	Epithelial cells	1.52655	0.988854	0.489678
SEMA3F	Epithelial cells	0.592679	2.27848	0.427159
SOX15	Epithelial cells	0.563779	0.757541	-1.5034
TUFT1	Epithelial cells	2.02072	1.90231	1.32813
SLC10A3	Epithelial cells	0.0195562	-0.0885444	0.549839
IER3	Epithelial cells	2.48014	2.32532	2.18937
SH2D3A	Epithelial cells	-0.153029	-0.368599	-0.10944
CNKSR1	Epithelial cells	1.12953	0.16257	0.426281
RHOD	Epithelial cells	2.58285	NA	4.7651
TMEM40	Epithelial cells	6.63114	1.47725	6.76972
TBC1D2	Epithelial cells	2.43707	1.85113	2.80179
BIK	Epithelial cells	0.929838	0.364921	-0.249519
AP1S1	Epithelial cells	0.250746	-0.150757	0.483891
DFNA5	Epithelial cells	-0.551315	-0.373604	3.01371
DSG3	Epithelial cells	-0.364217	-0.62507	3.52853
HBEGF	Epithelial cells	2.68678	4.62273	1.29348
EFNB1	Epithelial cells	1.83944	1.21181	0.773287
NR2F6	Epithelial cells	-0.324334	-0.139603	-0.614454
EVPL	Epithelial cells	-0.861197	-0.0437685	-0.34641
EXT2	Epithelial cells	0.153207	0.0282415	0.852869
F3	Epithelial cells	7.83106	6.06568	3.81076
GJB3	Epithelial cells	7.54596	6.88766	6.35398
GJB5	Epithelial cells	5.47804	3.88361	2.14353
IRF6	Epithelial cells	8.77496	6.13901	6.77802
JUP	Epithelial cells	0.110382	0.296584	1.07711
LIMK2	Epithelial cells	1.34962	0.537306	0.729291
MST1R	Epithelial cells	5.34546	1.90971	1.66758
PI3	Epithelial cells	5.79684	7.3218	4.32797
PLAGL2	Epithelial cells	0.221958	0.38896	0.0273785
PRRG2	Epithelial cells	0.81737	0.857981	0.138892
RELB	Epithelial cells	0.54882	0.294527	-0.411738
SHC1	Epithelial cells	0.749395	-0.25816	0.042507
SLC12A4	Epithelial cells	0.193304	0.0191538	-0.386493
SPINT1	Epithelial cells	0.170769	1.8247	2.63037
ST14	Epithelial cells	1.62755	-0.111568	2.62713
STXBP2	Epithelial cells	0.362027	0.126137	-0.365968
TAPBP	Epithelial cells	1.26336	0.959764	0.178459
CORO2A	Epithelial cells	0.664445	2.30544	1.59091
BTG2	Epithelial cells	-0.374699	-0.130498	-0.0402221
AXIN1	Epithelial cells	0.150731	-0.0580062	-0.334693
TNK1	Epithelial cells	-0.530096	0.247872	-0.67614
TNFSF9	Epithelial cells	2.38571	0.140799	2.04988
ADAM15	Epithelial cells	1.04342	0.702632	0.552135
TNFRSF10B	Epithelial cells	0.082934	0.323569	0.153213
RPS6KA4	Epithelial cells	0.0929556	0.220414	-0.320718
PDLIM1	Epithelial cells	0.986525	1.80237	0.740121
CELSR1	Epithelial cells	-0.163462	-0.0227546	0.485076
FGFBP1	Epithelial cells	6.71999	1.47145	-0.160966
CDC42EP2	Epithelial cells	1.05021	0.921201	0.254176
FST	Epithelial cells	3.96448	3.92012	1.67633
PPP1R13L	Epithelial cells	0.835034	0.61905	-0.276594
ARHGEF18	Epithelial cells	0.606264	0.27009	-0.0840764
ETHE1	Epithelial cells	0.735787	0.235997	0.10516
TNFRSF21	Epithelial cells	3.49156	3.47527	0.63616
TFCP2L1	Epithelial cells	-0.556866	0.224792	2.02664
GLTP	Epithelial cells	0.164932	-0.303965	1.2309
A4GALT	Epithelial cells	0.11549	0.18332	-0.0823459
RHOF	Epithelial cells	1.34942	1.17932	0.254549
SSH3	Epithelial cells	-0.137286	-0.135428	-0.446549
DOK4	Epithelial cells	-0.0532977	-0.295768	0.542107
FGD6	Epithelial cells	0.638143	0.313069	1.85484
TMPRSS4	Epithelial cells	8.01536	3.63834	7.15997
SMAGP	Epithelial cells	0.211311	0.268762	0.736996
XYLT2	Epithelial cells	0.12802	0.248681	0.708375
PORCN	Epithelial cells	1.68708	-0.177152	0.966891
ZFYVE21	Epithelial cells	0.718759	-0.0196202	0.165299
CHAC1	Epithelial cells	0.618676	-0.0840868	-0.975551
C1orf116	Epithelial cells	7.46621	6.05605	1.21147
ZBED2	Epithelial cells	6.19593	3.26122	0.109142
RHBDF2	Epithelial cells	0.0752205	0.166194	0.327843
PIP4K2C	Epithelial cells	0.386039	0.027314	0.0246304
FBXL18	Epithelial cells	-0.131071	-0.0299232	0.095829
LRRC8E	Epithelial cells	0.830693	-0.964747	2.45773
EPPK1	Epithelial cells	4.85984	4.26081	1.42832
CLDN4	Epithelial cells	6.11418	1.4046	5.5296
DSC2	Epithelial cells	-1.53526	-0.284435	-1.53027
ITGB4	Epithelial cells	-0.320161	0.307748	-0.512206
ITGB6	Epithelial cells	6.01328	0.784829	-0.866836
KRT7	Epithelial cells	9.00415	7.63756	7.71219
LAMA3	Epithelial cells	6.24269	1.76949	4.5165
LAMB3	Epithelial cells	7.18144	7.40413	7.98938
THBD	Epithelial cells	-0.665912	7.62878	5.87612
MPZL2	Epithelial cells	3.9328	4.72744	3.2044
G0S2	Epithelial cells	4.77087	3.32241	6.38355
LSR	Epithelial cells	-0.935713	0.0992756	-0.211717
ADM	Epithelial cells	1.02033	0.95341	1.2919
EFNA1	Epithelial cells	0.63426	1.7193	0.616125
EGFR	Epithelial cells	0.927503	2.40403	4.89653
KRT17	Epithelial cells	8.35766	6.02033	4.39436
LLGL2	Epithelial cells	0.437053	0.0553582	0.399331
PCDH1	Epithelial cells	1.65739	1.06594	2.07973
PDGFB	Epithelial cells	4.9669	4.69776	0.828182
PPL	Epithelial cells	1.79206	2.87542	2.5556
S100A2	Epithelial cells	6.8551	6.72357	2.61247
SCNN1A	Epithelial cells	1.61716	2.90904	5.72856
HMGA2	Epithelial cells	-0.517584	-0.133141	0.328107
PTGES	Epithelial cells	6.97067	5.45355	3.39608
RAB3D	Epithelial cells	-0.826475	-0.121656	-0.0567518
TSPAN1	Epithelial cells	8.0643	2.8154	5.09069
RAP1GAP2	Epithelial cells	0.0883576	0.38027	0.3591
DAPP1	Epithelial cells	1.32887	3.34016	2.1299
ANGPTL4	Epithelial cells	2.32398	3.35333	2.26354
SLC35F2	Epithelial cells	-0.347394	-0.0564988	0.168372
EPS8L1	Epithelial cells	0.104399	-0.262761	-0.830901
FERMT1	Epithelial cells	0.187445	-1.05295	2.46497
RAB11FIP1	Epithelial cells	0.169697	1.16239	-0.117406
ALS2CL	Epithelial cells	1.93218	2.42505	0.15383
ELF3	Epithelial cells	5.86669	3.24692	1.27687
KRT6A	Epithelial cells	7.73157	8.26879	3.99147
SLPI	Epithelial cells	5.28669	6.33573	7.06926
TGFA	Epithelial cells	3.82287	5.63979	0.583886
SCEL	Epithelial cells	3.51067	2.85888	2.18504
EHF	Epithelial cells	6.85401	4.90396	4.36829
NQO1	Epithelial cells	0.369723	-0.169809	0.542986
SDC4	Epithelial cells	2.85859	5.0311	0.49337
RASSF7	Epithelial cells	0.126907	0.431806	-0.312793
SH3BP1	Epithelial cells	-0.485093	0.406448	0.342194
APOBEC3C	Epithelial cells	1.63181	-0.0321947	4.72728
RIPK4	Epithelial cells	1.38895	0.777427	0.413643
CD44	Epithelial cells	7.5321	6.77772	6.96602

## Sheet: C- KnownEpithelial l2fc SCCOHT
Gene	NAME	Category	BIN67	COV434	SCCOHT1
CDH1	E-Cadherin	Epithelial	2.95158	0.151418	-0.697191
DSP	Desmoplakin	Epithelial	2.60176	1.75458	4.53023
OCLN	Occludin	Epithelial	-0.464444	0.0586618	-0.456888
TJP1	ZO-1	Epithelial	0.354294	0.744964	-0.274889
EPCAM	EpCAM	Epithelial	0.541023	-1.05295	-0.103918
KRT1	Keratin 1	Epithelial	-0.665912	4.86889	9.65609
KRT2	Keratin 2	Epithelial	3.79206	4.6518	3.09578
KRT3	Keratin 3	Epithelial	2.0019	3.97278	0.909069
KRT4	Keratin 4	Epithelial	6.01941	10.4884	-3.59912
KRT5	Keratin 5	Epithelial	7.4192	6.9065	7.83193
KRT6A	Keratin 6A	Epithelial	7.73157	8.26879	3.99147
KRT6B	Keratin 6B	Epithelial	8.61594	3.45971	7.09864
KRT6C	Keratin 6C	Epithelial	6.90625	8.86858	6.84053
KRT7	Keratin 7	Epithelial	9.00415	7.63756	7.71219
KRT8	Keratin 8	Epithelial	5.56493	5.20562	0.942953
KRT9	Keratin 9	Epithelial	7.07902	7.87007	7.7356
KRT10	Keratin 10	Epithelial	0.127916	0.0504542	-0.283157
KRT12	Keratin 12	Epithelial	0.908833	0.870599	2.33586
KRT13	Keratin 13	Epithelial	7.8026	7.12408	8.51797
KRT14	Keratin 14	Epithelial	6.91252	7.47283	6.6763
KRT15	Keratin 15	Epithelial	7.05934	3.86349	6.93983
KRT16	Keratin 16	Epithelial	7.28951	7.73802	5.45734
KRT17	Keratin 17	Epithelial	8.35766	6.02033	4.39436
KRT18	Keratin 18	Epithelial	3.56168	2.59107	1.25972
KRT19	Keratin 19	Epithelial	4.31006	1.60463	4.72641
KRT20	Keratin 20	Epithelial	-0.221624	0.15036	-2.0207
KRT23	Keratin 23	Epithelial	2.14865	3.02456	0.909069
KRT24	Keratin 24	Epithelial	-0.665912	-1.05295	0.64626
KRT25	Keratin 25	Epithelial	-1.39026	NA	0.796314
KRT26	Keratin 26	Epithelial	-0.665912	NA	NA
KRT27	Keratin 27	Epithelial	0.8848	-1.05295	1.61473
KRT28	Keratin 28	Epithelial	NA	NA	6.50305
KRT71	Keratin 71	Epithelial	8.02251	9.19719	4.9027
KRT72	Keratin 72	Epithelial	-1.45277	2.40763	2.32871
KRT73	Keratin 73	Epithelial	0.435052	0.870599	2.43224
KRT74	Keratin 74	Epithelial	2.39433	6.31787	4.04685
KRT75	Keratin 75	Epithelial	8.49588	6.60872	9.40065
KRT76	Keratin 76	Epithelial	NA	4.7988	NA
KRT77	Keratin 77	Epithelial	0.776761	4.76521	NA
KRT78	Keratin 78	Epithelial	4.92863	3.71748	0.828185
KRT79	Keratin 79	Epithelial	4.33332	3.52943	4.68113
KRT80	Keratin 80	Epithelial	9.11539	9.4878	7.27444

## Sheet: D-Curated Epithelial Signature
Gene
SFN
TACSTD2
PRSS8
AP1M2
B3GNT3
CBLC
HES2
RAB25
S100A14
FLNB
GRB7
LAD1
LAMA5
SEMA3F
SOX15
TUFT1
SLC10A3
IER3
SH2D3A
CNKSR1
RHOD
TMEM40
TBC1D2
BIK
AP1S1
DFNA5
DSG3
HBEGF
EFNB1
NR2F6
EVPL
EXT2
F3
GJB3
GJB5
IRF6
JUP
LIMK2
MST1R
PI3
PLAGL2
PRRG2
RELB
SHC1
SLC12A4
SPINT1
ST14
STXBP2
TAPBP
CORO2A
BTG2
AXIN1
TNK1
TNFSF9
ADAM15
TNFRSF10B
RPS6KA4
PDLIM1
CELSR1
FGFBP1
CDC42EP2
FST
PPP1R13L
ARHGEF18
ETHE1
TNFRSF21
TFCP2L1
GLTP
A4GALT
RHOF
SSH3
DOK4
FGD6
TMPRSS4
SMAGP
XYLT2
PORCN
ZFYVE21
CHAC1
C1orf116
ZBED2
RHBDF2
PIP4K2C
FBXL18
LRRC8E
EPPK1
CLDN4
DSC2
ITGB4
ITGB6
KRT7
LAMA3
LAMB3
THBD
MPZL2
G0S2
LSR
ADM
EFNA1
EGFR
KRT17
LLGL2
PCDH1
PDGFB
PPL
S100A2
SCNN1A
HMGA2
PTGES
RAB3D
TSPAN1
RAP1GAP2
DAPP1
ANGPTL4
SLC35F2
EPS8L1
FERMT1
RAB11FIP1
ALS2CL
ELF3
KRT6A
SLPI
TGFA
SCEL
EHF
NQO1
SDC4
RASSF7
SH3BP1
APOBEC3C
RIPK4
CD44
CDH1
DSP
OCLN
TJP1
EPCAM
KRT1
KRT2
KRT3
KRT4
KRT5
KRT6B
KRT6C
KRT8
KRT9
KRT10
KRT12
KRT13
KRT14
KRT15
KRT16
KRT18
KRT19
KRT20
KRT23
KRT24
KRT25
KRT26
KRT27
KRT28
KRT71
KRT72
KRT73
KRT74
KRT75
KRT76
KRT77
KRT78
KRT79
KRT80

## Sheet: E-SingScore Epithelial SCCOHT
	TotalScore	TotalDispersion	group	cellLine
BIN67_BRG1_1	0.102897	7057.18	BRG1	BIN67
BIN67_BRG1_2	0.116875	7074.97	BRG1	BIN67
BIN67_BRG1_3	0.127593	6633.15	BRG1	BIN67
BIN67_BRG1_4	0.127175	6708.77	BRG1	BIN67
BIN67_CTRL_1	-0.0160235	6023.8	Control	BIN67
BIN67_CTRL_2	-0.0244803	5894.82	Control	BIN67
BIN67_CTRL_3	-0.021813	6053.46	Control	BIN67
BIN67_CTRL_4	-0.0351497	5842.93	Control	BIN67
HT1_CTRL_1	-0.0642688	5764.35	Control	SCCOHT-1
HT1_CTRL_2	-0.0801272	6194.3	Control	SCCOHT-1
HT1_CTRL_3	-0.0683992	5506.38	Control	SCCOHT-1
HT1_BRG1_1	0.0329973	6348.49	BRG1	SCCOHT-1
HT1_BRG1_2	0.0102209	5682.81	BRG1	SCCOHT-1
HT1_BRG1_3	0.00958207	5973.4	BRG1	SCCOHT-1
COV434_CTRL_1	-0.0794347	6094.97	Control	COV434
COV434_CTRL_2	-0.0696128	4788.8	Control	COV434
COV434_CTRL_3	-0.0939185	6788.83	Control	COV434
COV434_BRG1_1	0.039851	6590.16	BRG1	COV434
COV434_BRG1_2	0.0204097	5946.71	BRG1	COV434
COV434_BRG1_3	-0.00704908	5629.43	BRG1	COV434

## Sheet: F-ProteinRNA Epithelial
Gene	uniprot	n_peptides	log2_FC_proteomics	p_proteomics	p.fdr_proteomics	Significanceproteomics	baseMean.RNA	log2FoldChange.RNA	lfcSE.RNA	stat.RNA	pvalue.RNA	padj.RNA
SFN	P31947	3	3.05572	1.21075e-15	8.25472e-14	p.fdr<0.05 & Upregulated	6976.18	5.38675	0.208073	25.8887	8.92464e-148	2.72922e-145
FLNB	O75369	118	0.845215	8.576e-189	4.9115e-185	p.fdr<0.05 & Upregulated	37929.6	2.6654	0.225523	11.8188	3.12276e-32	1.0043e-30
LAMA5	O15230	7	0.23526	0.00312525	0.0361582	p.fdr<0.05 & Upregulated	15239.6	1.52655	0.24034	6.35165	2.13024e-10	1.94206e-09
TUFT1	Q9NNX1	1	0.441042	0.00393628	0.0433357	p.fdr<0.05 & Upregulated	6192.36	2.02072	0.220388	9.16893	4.77746e-20	8.78438e-19
AP1S1	P61966	3	-0.00974821	0.981991	1	N.S.	8197.63	0.250746	0.0839086	2.98833	0.00280506	0.00841422
EFNB1	P98172	2	0.530431	0.000911108	0.0132434	p.fdr<0.05 & Upregulated	7083.93	1.83944	0.143988	12.7749	2.26342e-37	8.787e-36
EXT2	Q93063	2	-0.0215323	0.887564	1	N.S.	10156.6	0.153207	0.087533	1.75028	0.0800706	0.150076
JUP	P14923	14	0.105581	0.207286	0.633809	N.S.	25103.3	0.110382	0.0989141	1.11594	0.264449	0.388211
RELB	Q01201	5	0.518267	9.2441e-09	3.60143e-07	p.fdr<0.05 & Upregulated	4759.64	0.54882	0.130672	4.19999	2.66928e-05	0.000123679
SHC1	P29353	6	0.25555	0.000153947	0.00271279	p.fdr<0.05 & Upregulated	12221.9	0.749395	0.143109	5.23655	1.63607e-07	1.05741e-06
SLC12A4	Q9UP95	3	0.0168986	0.962818	1	N.S.	10204.1	0.193304	0.122301	1.58057	0.113976	0.200154
STXBP2	Q15833	5	0.0725625	0.514261	0.985798	N.S.	4676.65	0.362027	0.141026	2.56709	0.0102555	0.0264208
TAPBP	O15533	4	0.5207	3.36159e-07	1.03505e-05	p.fdr<0.05 & Upregulated	13258.9	1.26336	0.135158	9.34724	8.99652e-21	1.72328e-19
ADAM15	Q13444	1	0.339376	0.158848	0.547164	N.S.	7958	1.04342	0.176531	5.91069	3.40678e-09	2.72401e-08
TNFRSF10B	O14763	3	-0.216144	0.0365877	0.216913	N.S.	26378.3	0.082934	0.166403	0.498393	0.618207	0.723701
PDLIM1	O00151	12	0.460941	3.43546e-14	2.16208e-12	p.fdr<0.05 & Upregulated	7039.29	0.986525	0.188968	5.22059	1.78357e-07	1.14679e-06
CDC42EP2	O14613	3	0.263963	0.0314556	0.197529	N.S.	1776.37	1.05021	0.156311	6.71872	1.83331e-11	1.85469e-10
PPP1R13L	Q8WUF5	12	0.183111	0.000816416	0.0120556	p.fdr<0.05 & Upregulated	7511.21	0.835034	0.170891	4.88635	1.02723e-06	5.93295e-06
ARHGEF18	Q6ZSZ5	2	0.0347808	0.928559	1	N.S.	4323.88	0.606264	0.0788709	7.6868	1.50865e-14	1.98022e-13
ETHE1	O95571	11	0.166356	0.114505	0.450541	N.S.	5186.69	0.735787	0.215553	3.41349	0.000641366	0.00226334
GLTP	Q9NZD2	1	0.00380936	0.970019	1	N.S.	4658.57	0.164932	0.0866228	1.90402	0.0569073	0.113172
RHOF	Q9HBH0	3	0.198547	0.0130244	0.107949	N.S.	11808.7	1.34942	0.140433	9.60898	7.32682e-22	1.47646e-20
SSH3	Q8TE77	2	0.112427	0.325996	0.803108	N.S.	3227.54	-0.137286	0.0924181	-1.48549	0.137415	0.232145
FGD6	Q6ZV73	1	0.085632	0.649261	1	N.S.	1150.04	0.638143	0.227111	2.80982	0.0049569	0.0139586
PIP4K2C	Q8TBX8	8	0.0341734	0.961833	1	N.S.	7246.68	0.386039	0.0878719	4.3932	1.11692e-05	5.50442e-05
FBXL18	Q96ME1	1	0.0749264	0.50986	0.983154	N.S.	377.851	-0.131071	0.213914	-0.612726	0.540057	0.657522
EPPK1	P58107	1	0.0265681	0.843283	1	N.S.	85.5982	4.85984	0.429423	11.3171	1.07929e-29	3.11476e-28
LSR	Q86X29	7	-0.158769	0.0130248	0.107949	N.S.	17134.1	-0.935713	0.137977	-6.78165	1.18815e-11	1.21971e-10
EGFR	P00533	1	-0.039784	0.764047	1	N.S.	2621.32	0.927503	0.34597	2.68087	0.00734298	0.0197493
KRT17	Q04695	6	4.33887	3.296e-21	3.93254e-19	p.fdr<0.05 & Upregulated	13920.2	8.35766	0.255802	32.6724	3.85124e-234	3.72949e-231
LLGL2	Q6P1M3	3	0.0776191	0.590556	1	N.S.	9868.69	0.437053	0.256921	1.70112	0.0889209	0.163569
PPL	O60437	5	1.45164	4.86004e-16	3.52322e-14	p.fdr<0.05 & Upregulated	3377.5	1.79206	0.156956	11.4176	3.41436e-30	1.00533e-28
S100A2	P29034	2	3.40181	5.99668e-11	2.7696e-09	p.fdr<0.05 & Upregulated	3823.73	6.8551	0.259847	26.3813	2.24442e-153	7.52355e-151
HMGA2	P52926	2	0.0948332	0.370177	0.852092	N.S.	19928	-0.517584	0.124391	-4.16096	3.16912e-05	0.000145256
ANGPTL4	Q9BY76	1	1.12371	1.97943e-05	0.000432679	p.fdr<0.05 & Upregulated	11711.4	2.32398	0.295247	7.87131	3.50957e-15	4.79806e-14
RAB11FIP1	Q6WKZ4	18	0.0348829	0.997411	1	N.S.	8444.9	0.169697	0.172544	0.983499	0.325362	0.454255
KRT6A	P02538	20	3.55457	3.14478e-67	2.25127e-64	p.fdr<0.05 & Upregulated	145723	7.73157	0.240789	32.1093	3.2739e-226	2.85336e-223
SCEL	O95171	1	0.891471	0.00485461	0.0511072	N.S.	7368.57	3.51067	0.219319	16.0072	1.13853e-57	7.24295e-56
RASSF7	Q02833	1	0.0760716	0.488157	0.964193	N.S.	3541.97	0.126907	0.143835	0.882311	0.377609	0.507486
RIPK4	P57078	1	0.231143	0.0566296	0.287667	N.S.	1168.9	1.38895	0.210396	6.60162	4.06683e-11	3.92085e-10
CD44	P16070	2	2.20153	1.26954e-10	5.72495e-09	p.fdr<0.05 & Upregulated	12166.6	7.5321	0.265342	28.3863	2.9816e-177	1.73241e-174
DSP	P15924	6	1.14059	4.83059e-15	3.14373e-13	p.fdr<0.05 & Upregulated	9067.83	2.60176	0.230915	11.2672	1.90546e-29	5.41828e-28
OCLN	Q16625	6	-0.142023	0.0457008	0.250458	N.S.	4342.79	-0.464444	0.160021	-2.90239	0.00370333	0.0107516
TJP1	Q07157	29	0.139134	7.54442e-05	0.00145969	p.fdr<0.05 & Upregulated	12989.8	0.354294	0.0748292	4.7347	2.19378e-06	1.201e-05
KRT8	P05787	20	3.52988	1.14376e-61	5.95485e-59	p.fdr<0.05 & Upregulated	17864	5.56493	0.170395	32.659	5.97787e-234	5.48422e-231
KRT14	P02533	1	1.85919	3.71606e-05	0.000762791	p.fdr<0.05 & Upregulated	2593.86	6.91252	0.261111	26.4735	1.9569e-154	6.68839e-152
KRT16	P08779	3	2.71164	3.91329e-13	2.21895e-11	p.fdr<0.05 & Upregulated	4604.73	7.28951	0.308062	23.6625	8.78255e-124	1.86693e-121
KRT18	P05783	15	2.84347	2.93104e-47	1.29124e-44	p.fdr<0.05 & Upregulated	22719.9	3.56168	0.262565	13.5649	6.46265e-42	2.86643e-40
KRT19	P08727	1	0.153391	0.148123	0.523642	N.S.	11.8796	4.31006	0.95999	4.4897	7.13247e-06	3.63739e-05
