# Supplementary material for: Re-expression of SMARCA4/BRG1 in small cell carcinoma of ovary, hypercalcemic type (SCCOHT) promotes an epithelial-like gene signature through an AP-1-dependent mechanism
Source: eLife. 2020 Dec 23;9:e59073. doi: 10.7554/eLife.59073 (PMC7813545; doi:10.7554/eLife.59073)
Supplement: Figure 3—source data 1. [file elife-59073-fig3-data1.xlsx]

## Sheet: README
Orlando et al eLife
Figure 3: Source Data File 1
A = Figure 3A: Singscore results, Epithelial Signature, A427 +/- BRG1 RNAseq
B = Figure 3B: Singscore results, Epithelial Signature H358 Parent, BRG1 KO, BRM KO RNA-seq
C = Figure 3C: TCGA ATAC-seq %Overlap with Gained ATAC-seq Peaks + BRG1 Mutation Frequency
D = Figure 3E/F: Claudin-4 IHC Staining for Ovarian TMA
E = Figure G/H: CD44 IF Staining for Ovarian TMA

## Sheet: A- A427
	TotalScore	TotalDispersion	group	cellLine
CTRL_1	-0.00716143	7795.51	Control	A427
CTRL_2	-0.0223018	7623.53	Control	A427
CTRL_3	-0.0220096	7802.92	Control	A427
BRG1_1	0.0785614	7432.27	BRG1	A427
BRG1_2	0.070653	6993.42	BRG1	A427
BRG1_3	0.0752536	6929.67	BRG1	A427

## Sheet: B-H358
	TotalScore	TotalDispersion	group	cellLine
BRG1_KO_1	0.0412348	5879.99	BRG1 KO	H358
BRG1_KO_2	0.0545477	5583.47	BRG1 KO	H358
BRG1_KO_3	-0.0243991	6126.1	BRG1 KO	H358
BRM_KO_1	0.160488	5799.93	BRM KO	H358
BRM_KO_2	0.154461	5940.78	BRM KO	H358
BRM_KO_3	0.166462	5761.38	BRM KO	H358
Parent1	0.139193	6815.51	Parent	H358
Parent2	0.117757	6729.52	Parent	H358
Parent3	0.119739	6886.68	Parent	H358

## Sheet: C-TCGA ATAC OL
t.TCGAtumor	n.Tumors.xCellEpi	meanEpiScore	tumorType	category	n.PeaksOL.ATAC	percentOL	total_mut_freq	total_n	percentBRG1Mutations
TCGA-ACC	88	0.0346447	ACC	../peaks/ACC_peakCalls.sorted.bed	1834	45.5879	0.0126582	1	1.27
TCGA-BLCA	410	0.856456	BLCA	../peaks/BLCA_peakCalls.sorted.bed	2254	56.0278	0.0468384	20	4.68
TCGA-BRCA	1083	0.546762	BRCA	../peaks/BRCA_peakCalls.sorted.bed	2886	71.7375	0.0106996	13	1.07
TCGA-CESC	304	0.981502	CESC	../peaks/CESC_peakCalls.sorted.bed	1870	46.4827	0.0291262	9	2.91
TCGA-CHOL	50	0.639639	CHOL	../peaks/CHOL_peakCalls.sorted.bed	1910	47.477	0.0222222	1	2.22
TCGA-COAD	455	0.767485	COAD	../peaks/COAD_peakCalls.sorted.bed	2170	53.9398	0.0609756	20	6.1
TCGA-ESCA	182	0.839303	ESCA	../peaks/ESCA_peakCalls.sorted.bed	2965	73.7012	0.0612245	12	6.12
TCGA-GBM	594	0.0111411	GBM	../peaks/GBM_peakCalls.sorted.bed	1578	39.2245	0.0172414	3	1.72
TCGA-HNSC	527	0.963514	HNSC	../peaks/HNSC_peakCalls.sorted.bed	2732	67.9095	0.0388693	22	3.89
TCGA-KIRC	483	0.13393	KIRC	../peaks/KIRC_peakCalls.sorted.bed	1942	48.2724	0.0214521	13	2.15
TCGA-KIRP	279	0.362658	KIRP	../peaks/KIRP_peakCalls.sorted.bed	2944	73.1792	0.0247678	8	2.48
TCGA-LGG	511	0.00253041	LGG	../peaks/LGG_peakCalls.sorted.bed	1259	31.2951	0.0318352	17	3.18
TCGA-LIHC	375	0.138737	LIHC	../peaks/LIHC_peakCalls.sorted.bed	1394	34.6508	0.0235849	10	2.36
TCGA-LUAD	564	0.775625	LUAD	../peaks/LUAD_peakCalls.sorted.bed	2890	71.8369	0.0763889	44	7.64
TCGA-LUSC	498	0.782696	LUSC	../peaks/LUSC_peakCalls.sorted.bed	2567	63.8081	0.0325497	18	3.25
TCGA-MESO	83	0.18208	MESO	../peaks/MESO_peakCalls.sorted.bed	1978	49.1673	0.0114943	1	1.15
TCGA-PCPG	150	0.00515911	PCPG	../peaks/PCPG_peakCalls.sorted.bed	975	24.2356	0.00534759	1	0.53
TCGA-PRAD	467	0.541812	PRAD	../peaks/PRAD_peakCalls.sorted.bed	1485	36.9128	0.00363636	2	0.36
TCGA-SKCM	467	0.193179	SKCM	../peaks/SKCM_peakCalls.sorted.bed	1654	41.1136	0.0697674	33	6.98
TCGA-STAD	437	0.719314	STAD	../peaks/STAD_peakCalls.sorted.bed	2381	59.1847	0.0511111	23	5.11
TCGA-TGCT	144	0.192795	TGCT	../peaks/TGCT_peakCalls.sorted.bed	787	19.5625	0.00641026	1	0.64
TCGA-THCA	449	0.619261	THCA	../peaks/THCA_peakCalls.sorted.bed	1803	44.8173	0	0	0
TCGA-UCEC	540	0.67569	UCEC	../peaks/UCEC_peakCalls.sorted.bed	2154	53.5421	0.0696517	14	6.97

## Sheet: D -TMA CLDN4 IHC
Diagnosis	intensity	%	H-score
CCOC	1	5	5
CCOC	1	20	20
CCOC	1	60	60
CCOC	1	20	20
CCOC	1	10	10
CCOC	1	10	10
CCOC	2	100	200
CCOC	1	30	30
CCOC	1	80	80
CCOC	3	60	180
CCOC	1	80	80
CCOC	2	80	160
ENOC	2	100	200
ENOC	2	90	180
ENOC	3	100	300
ENOC	1	80	80
ENOC	1	80	80
ENOC	3	80	240
ENOC	2	90	180
ENOC	2	90	180
ENOC	3	100	300
ENOC	2	80	160
ENOC	2	80	160
ENOC	1	5	5
ENOC	3	70	210
ENOC	2	80	160
ENOC	0		0
ENOC	3	80	240
ENOC	3	100	300
ENOC	3	60	180
ENOC	2	90	180
HGSC	2	90	180
HGSC	2	100	200
HGSC	1	5	5
HGSC	2	80	160
HGSC	1	70	70
HGSC	1	5	5
HGSC	2	60	120
HGSC	1	60	60
HGSC	1	60	60
HGSC	1	30	30
HGSC	0		0
HGSC	1	20	20
HGSC	1	80	80
HGSC	1	100	100
HGSC	3	50	150
HGSC	1	30	30
HGSC	3	90	270
HGSC	3	100	300
HGSC	1	20	20
HGSC	1	20	20
HGSC	1	70	70
HGSC	3	80	240
HGSC	1	30	30
HGSC	1	10	10
HGSC	1	5	5
HGSC	1	40	40
HGSC	2	80	160
HGSC	2	60	120
HGSC	1	10	10
HGSC	1	90	90
HGSC	1	90	90
HGSC	1	90	90
HGSC	3	50	150
LGSC	1	10	10
LGSC	2	80	160
LGSC	1	10	10
LGSC	1	10	10
LGSC	1	50	50
LGSC	2	80	160
LGSC	1	5	5
LGSC	2	20	40
LGSC	1	5	5
LGSC	1	5	5
LGSC	2	100	200
LGSC	1	50	50
LGSC	2	100	200
LGSC	2	80	160
LGSC	1	60	60
LGSC	2	80	160
LGSC	1	90	90
LGSC	1	10	10
LGSC	1	20	20
LGSC	1	50	50
LGSC	2	100	200
LGSC	1	50	50
LGSC	1	60	60
LGSC	1	80	80
LGSC	2	80	160
LGSC	1	100	100
LGSC	1	50	50
LGSC	1	5	5
LGSC	1	60	60
LGSC	1	30	30
LGSC	1	70	70
LGSC	1	80	80
LGSC	1	20	20
LGSC	1	70	70
LGSC	1	5	5
LGSC	1	70	70
LGSC	1	80	80
LGSC	1	70	70
MOC	3	100	300
MOC	2	60	120
MOC	2	80	160
MOC	2	60	120
MOC	1	30	30
MOC	1	30	30
MOC	2	90	180
MOC	1	80	80
MOC	2	90	180
SBOT	1	50	50
SBOT	1	5	5
SBOT	1	70	70
SBOT	1	70	70
SBOT	1	50	50
SBOT	1	30	30
SBOT	1	30	30
SBOT	1	70	70
SBOT	1	20	20
SBOT	1	100	100
SBOT	1	50	50
SBOT	1	50	50
SBOT	1	50	50
SBOT	1	30	30
SBOT	1	90	90
SBOT	1	10	10
SBOT	1	50	50
SBOT	1	20	20
SCCOHT	0		0
SCCOHT	0		0
SCCOHT	0		0
SCCOHT	0		0
SCCOHT	0		0
SCCOHT	0		0
SCCOHT	0		0
SCCOHT	0		0
SCCOHT	0		0
SCCOHT	0		0
SCCOHT	0		0
SCCOHT	0		0
SCCOHT	0		0
SCCOHT	0		0
SCCOHT	0		0
SCCOHT	0		0

## Sheet: E -TMA CD44 IF
percentScore (%CD44/DAPI)	TumorType
8.90688	SCCOHT
3.1451	SCCOHT
7.36104	SCCOHT
20	SCCOHT
5.14372	SCCOHT
1.15794	SCCOHT
1.4783	SCCOHT
2.59259	SCCOHT
1.05485	SCCOHT
1.33579	SCCOHT
11.0785	SCCOHT
13.4395	SCCOHT
8.20046	SCCOHT
7.49479	SCCOHT
6.96552	SCCOHT
4.3235	SCCOHT
13.7957	SCCOHT
11.9011	SCCOHT
12.249	SCCOHT
14.6982	SCCOHT
6.43594	SCCOHT
8.72534	SCCOHT
7.19226	SCCOHT
1.43562	SCCOHT
0.869565	SCCOHT
6.57501	SCCOHT
11.3968	SCCOHT
0.216294	SCCOHT
0.229885	SCCOHT
9.42877	SCCOHT
20.915	SCCOHT
22.6976	SCCOHT
31.8984	SCCOHT
8.91211	SCCOHT
1.87291	SCCOHT
25.5435	SCCOHT
16.2864	SCCOHT
17.8909	SCCOHT
12.7839	SCCOHT
11.0212	LGSC
9.34752	LGSC
40.1304	LGSC
46.9347	LGSC
27.5685	LGSC
38.7903	LGSC
29.0194	LGSC
37.5492	LGSC
30.6713	LGSC
36.0647	LGSC
33.0377	LGSC
26.9324	LGSC
34.7845	LGSC
34.0788	LGSC
60.4826	LGSC
70.915	LGSC
48.694	LGSC
13.0995	LGSC
48.2311	LGSC
22.0809	LGSC
31.3523	LGSC
38.0829	LGSC
38.1671	LGSC
29.5696	LGSC
24.2911	LGSC
43.3648	LGSC
28.4557	LGSC
59.0379	LGSC
57.4576	LGSC
62.19	LGSC
35.2447	LGSC
84.2623	LGSC
32.5362	LGSC
22.8079	LGSC
24.3409	LGSC
18.6335	LGSC
63.7868	LGSC
60.6186	LGSC
16.7869	LGSC
11.4499	LGSC
32.5951	LGSC
32.319	LGSC
40.5876	LGSC
38.6333	LGSC
44.2748	LGSC
87.3171	LGSC
43.6582	LGSC
29.0323	LGSC
13.3742	LGSC
14.2453	LGSC
31.4381	LGSC
21.1679	LGSC
43.3871	LGSC
54.6851	LGSC
63.342	LGSC
67.8091	LGSC
29.0413	LGSC
12.9758	LGSC
21.5909	LGSC
51.1797	LGSC
5.9417	LGSC
5.65405	LGSC
27.5298	LGSC
20.5674	LGSC
44.2799	LGSC
43.2143	LGSC
39.3426	LGSC
35.3993	LGSC
23.4655	LGSC
20.1408	LGSC
28.0201	LGSC
24.9621	LGSC
36.4558	LGSC
66.9014	LGSC
18.7662	LGSC
24.721	LGSC
19.3142	LGSC
16.0223	LGSC
21.3916	LGSC
23.8591	LGSC
38.1443	LGSC
34.3384	LGSC
35.9659	LGSC
33.4041	HGSC
40.8467	HGSC
16.3489	HGSC
15.5133	HGSC
3.77907	HGSC
6.90151	HGSC
45.9305	HGSC
29.9477	HGSC
23.9155	HGSC
23.2487	HGSC
23.5679	HGSC
20.1223	HGSC
8.79857	HGSC
29.6912	HGSC
28.1094	HGSC
13.8072	HGSC
34.726	HGSC
17.2483	HGSC
38.472	HGSC
25.1286	HGSC
36.422	HGSC
50.8265	HGSC
41.6778	HGSC
48.2456	HGSC
26.384	HGSC
45.3532	HGSC
18.7748	HGSC
28.0201	HGSC
24.9775	HGSC
39.7897	HGSC
17.5948	HGSC
35.0291	HGSC
45.557	HGSC
28.6564	HGSC
11.1387	HGSC
19.2024	HGSC
11.3577	HGSC
12.9814	HGSC
2.71186	HGSC
9.93266	HGSC
32.6571	HGSC
33.0639	HGSC
19.2771	HGSC
10.3864	HGSC
17.9421	HGSC
11.2782	HGSC
3.60934	HGSC
39.5577	HGSC
3.62511	HGSC
18.5503	HGSC
12.4355	HGSC
11.4256	HGSC
31.5402	HGSC
28.8584	HGSC
32.3869	HGSC
36.7708	HGSC
22.5731	HGSC
14.9109	HGSC
46.9162	HGSC
52.5641	HGSC
22.4677	HGSC
21.0806	HGSC
52.6316	HGSC
35.3011	HGSC
40.2181	ENOC
9.74026	ENOC
50.0929	ENOC
70.5214	ENOC
33.9806	ENOC
25.4783	ENOC
44.4768	ENOC
44.5604	ENOC
13.4342	ENOC
10.4316	ENOC
46.4754	ENOC
81.2793	ENOC
43.0911	ENOC
23.7001	ENOC
44.4785	ENOC
63.4515	ENOC
48.5096	ENOC
19.2076	ENOC
57.7663	ENOC
43.7545	ENOC
42.8415	ENOC
34.9263	ENOC
17.3637	ENOC
35.9543	ENOC
76.5614	ENOC
47.2826	ENOC
22.2772	ENOC
47.9821	ENOC
44.8276	ENOC
19.4489	ENOC
42.7799	ENOC
40.2507	ENOC
21.3572	ENOC
53.9954	ENOC
58.5865	ENOC
43.5098	ENOC
28.0609	ENOC
6.5885	CCOC
5.78671	CCOC
25.3867	CCOC
48.9708	CCOC
48.2307	CCOC
35.2884	CCOC
14.0646	CCOC
15.2249	CCOC
30.2632	CCOC
37.6932	CCOC
12.3298	CCOC
12.5072	CCOC
12.0059	CCOC
69.3053	CCOC
52.2167	CCOC
73.3204	CCOC
73.7123	CCOC
16.568	CCOC
35.1667	CCOC
53.0892	CCOC
52.2546	CCOC
28.0575	CCOC
41.206	CCOC
12.0743	MOC
13.0734	MOC
36.8116	MOC
22.0485	MOC
11.4155	MOC
20.0568	MOC
43.5973	MOC
35.782	MOC
31.1268	MOC
35.139	MOC
16.5049	MOC
27.9159	MOC
27.6003	MOC
22.5902	MOC
17.7268	MOC
4.99325	MOC
12.9738	MOC
