# Supplementary material for: Re-expression of SMARCA4/BRG1 in small cell carcinoma of ovary, hypercalcemic type (SCCOHT) promotes an epithelial-like gene signature through an AP-1-dependent mechanism
Source: eLife. 2020 Dec 23;9:e59073. doi: 10.7554/eLife.59073 (PMC7813545; doi:10.7554/eLife.59073)
Supplement: Figure 4—figure supplement 1—source data 1. [file elife-59073-fig4-figsupp1-data1.xlsx]

## Sheet: Panel_B
feature	log2FoldChange	peak_group
MAML2	0.223737	CTRL
EEF1G	-0.00790667	CTRL
ISPD	-0.853339	CTRL
FGGY	-0.129853	CTRL
LURAP1L	-0.769221	CTRL
ATE1	-0.311228	CTRL
CKS1B	-1.09588	CTRL
BCL2A1	-0.208255	CTRL
PDGFC	0.706306	CTRL
HEXB	-0.888763	CTRL
IFT57	-0.742023	CTRL
ANXA5	0.179419	CTRL
LETM2	-0.273407	CTRL
TJP2	-0.238747	CTRL
PPP2R2C	0.00597244	CTRL
LMNA	1.32745	CTRL
EGLN1	-0.613677	CTRL
SEMA4A	-0.69975	CTRL
CUBN	1.23544	CTRL
BCAS4	-1.31157	CTRL
KCTD12	-0.84986	CTRL
ATP11A	-1.06579	CTRL
ID4	-0.972059	CTRL
SLC25A37	-0.260952	CTRL
SCG2	0.173384	CTRL
HIST1H4B	0.0661055	CTRL
COL11A1	-0.248793	CTRL
PARD3	0.750091	CTRL
NFAT5	0.202406	CTRL
ERRFI1	-0.681026	CTRL
NANOS3	0.212836	CTRL
PHLDA1	-0.225665	CTRL
KLF9	-1.22692	CTRL
NTS	-0.397974	CTRL
SEMA3A	-0.570292	CTRL
SGK1	-0.322322	CTRL
MCM5	-0.970085	CTRL
BBX	-0.481581	CTRL
C12orf66	-0.288765	CTRL
GATA3	-1.01893	CTRL
COA4	-0.573206	CTRL
H2AFJ	-1.2871	CTRL
EMP1	-0.836579	CTRL
HIST1H3C	-1.90451	CTRL
SLC35F2	0.168372	CTRL
SULT2B1	0.48158	CTRL
FAP	2.69387	CTRL
CTSL	-0.0288868	CTRL
ITGBL1	1.64219	CTRL
ENC1	-0.668592	CTRL
KTN1	-0.0352747	CTRL
ZNF217	-0.436683	CTRL
CDK7	-0.282753	CTRL
CAV1	-0.349279	CTRL
ARIH1	-0.0609088	CTRL
FOSB	-2.05783	CTRL
TSEN34	-0.279765	CTRL
IFIH1	-1.71717	CTRL
NAB2	-0.290099	CTRL
AATK	-0.677125	CTRL
BLID	-1.49513	CTRL
TCEA1	-0.907297	CTRL
MSH5	-1.14563	CTRL
TFPI	-0.234056	CTRL
ATP9A	0.322191	CTRL
NOLC1	-0.281998	CTRL
BNC1	-0.829127	CTRL
KRR1	-0.567074	CTRL
ISG20	0.0414145	CTRL
ASB18	-0.0626619	CTRL
PARD6B	-1.42239	CTRL
RUSC2	0.19867	CTRL
GTF3C2	-0.183087	CTRL
NEXN	-0.110991	CTRL
KCNN4	0.358489	CTRL
MAP7D1	-0.238576	CTRL
NCR3LG1	-0.33809	CTRL
MAL2	-0.360756	CTRL
KLF2	-0.761476	CTRL
PRMT1	-0.39967	CTRL
FOXG1	-0.55398	CTRL
CNN1	2.91286	CTRL
MRPS18B	-0.342735	CTRL
ZFP36	0.520053	CTRL
MET	0.158139	CTRL
TRDMT1	-0.502913	CTRL
ITPKC	-0.0656197	CTRL
TUBB	0.306695	CTRL
MYC	-0.207181	CTRL
FLNB	2.1657	CTRL
MICU3	0.127821	CTRL
MIDN	-0.763146	CTRL
VGF	-0.255207	CTRL
HES7	-2.15968	CTRL
RIPK2	-0.682505	CTRL
MSANTD3	0.374451	CTRL
RHOH	-0.725093	CTRL
DIP2B	-0.349091	CTRL
IRF2BP2	0.0462787	CTRL
NTN5	-0.207412	CTRL
RUFY3	-1.04283	CTRL
ZFP91-CNTF	-0.462357	CTRL
GOLPH3L	0.435898	CTRL
PTP4A1	-0.613261	CTRL
CDK2AP2	-0.733301	CTRL
CAPN2	1.17333	CTRL
MED1	-0.221647	CTRL
ADGRG6	-0.58224	CTRL
LDLR	-0.444483	CTRL
KDM6B	-0.442404	CTRL
ZFP91	-0.00512523	CTRL
HIST1H4A	-1.01448	CTRL
ZBTB7B	-0.192222	CTRL
BCAS1	-0.732774	CTRL
WRAP53	-0.851459	CTRL
TUBB3	0.0963617	CTRL
RNASE4	-1.06569	CTRL
MRPL54	-0.379266	CTRL
ABCC2	0.773603	CTRL
DMWD	-0.37819	CTRL
GLIPR1L2	-0.210405	CTRL
ID3	-0.572222	CTRL
DNAJB2	-0.531988	CTRL
KCMF1	-0.173455	CTRL
COL5A2	-0.24064	CTRL
EID3	-1.94998	CTRL
CREM	-0.544522	CTRL
ZFP36L2	1.2292	CTRL
GTPBP1	-0.391088	CTRL
JUN	-0.191096	CTRL
MGST3	0.309475	CTRL
ZFP36L1	2.10243	CTRL
RABAC1	0.139465	CTRL
SDHB	-0.651908	CTRL
LTBP4	-0.224269	CTRL
WDR74	-0.582849	CTRL
PIGC	-0.390763	CTRL
NSMF	0.192345	CTRL
ASXL1	-0.351641	CTRL
SRP9	-0.498192	CTRL
CNTD2	-1.12866	CTRL
MYL12B	-0.135948	CTRL
ERCC1	-0.784849	CTRL
SLC35E4	0.524644	CTRL
KLHL21	0.0287521	CTRL
TBC1D17	-0.425293	CTRL
WDR75	-1.01504	CTRL
TRIO	0.745008	CTRL
MXD1	-0.733925	CTRL
ID1	-0.144009	CTRL
USP5	-0.199307	CTRL
CIC	-0.184339	CTRL
TAF3	-0.900768	CTRL
FER	-0.18608	CTRL
FOSL1	-0.126963	CTRL
HIST1H2AD	-1.14397	CTRL
ZNF473	-0.514716	CTRL
AKT1S1	-0.528837	CTRL
TMEM57	0.549024	CTRL
SOX15	-1.5034	CTRL
GPER1	0.75217	CTRL
SLC4A7	-0.162865	CTRL
LSM 10.00	-0.80497	CTRL
SLMAP	0.0425882	CTRL
MYO7B	7.84103	CTRL
CLSTN1	0.43905	CTRL
NCOR1	-0.275546	CTRL
PHLDA3	0.593079	CTRL
KATNB1	0.395755	CTRL
OSM	-2.28245	CTRL
SREBF2	-0.370577	CTRL
FTL	-0.136206	CTRL
TMEM189-UBE2V1	-0.606271	CTRL
CAPZA2	-0.533622	CTRL
SLC30A8	0.98504	CTRL
SERINC3	0.170212	CTRL
CISD1	-0.42014	CTRL
PRR3	-0.480372	CTRL
ARID5B	-0.360625	CTRL
INAFM1	-0.478768	CTRL
NLGN1	0.125764	CTRL
TMEM207	-2.42665	CTRL
SPATA2L	-1.35083	CTRL
TNKS1BP1	0.22097	CTRL
HIST1H2AE	-0.769835	CTRL
METTL16	-0.611295	CTRL
VCL	0.910369	CTRL
NAA20	-0.140005	CTRL
OR2L3	-1.57734	CTRL
NAB1	0.1653	CTRL
EXPH5	2.0349	CTRL
CTTNBP2NL	0.395782	CTRL
HIST1H2BO	-0.229596	CTRL
MAFF	-0.881592	CTRL
RPLP0	-0.0334211	CTRL
TLCD1	-1.06724	CTRL
PRPF8	-0.457765	CTRL
RBM39	-0.394938	CTRL
HIST1H2AG	-0.896879	CTRL
BORCS7-ASMT	0.473312	CTRL
SPRED3	0.11394	CTRL
ZBTB21	-0.443025	CTRL
C2CD2	-0.260965	CTRL
C10orf107	-0.289049	CTRL
GLI1	-0.910919	CTRL
FLYWCH1	0.621572	CTRL
MT2A	3.30249	CTRL
YPEL5	-0.125494	CTRL
HIST1H2BI	-1.75953	CTRL
HIST1H3D	-0.796551	CTRL
USP9X	-0.345242	CTRL
NAA15	-0.233259	CTRL
RPL41	-0.143577	CTRL
RHOF	0.254549	CTRL
ARHGEF37	-0.87617	CTRL
HMGN4	-0.335497	CTRL
EEF2	0.00668262	CTRL
PHLDB1	0.781568	CTRL
RAD51D	-0.448328	CTRL
SRSF6	-0.144077	CTRL
TNFRSF11B	-0.500773	CTRL
CHCHD5	-0.758601	CTRL
RGL3	-3.73603	CTRL
TES	-0.911671	CTRL
SZRD1	-0.111497	CTRL
RASL10A	-0.934981	CTRL
CIRBP	0.210046	CTRL
GULP1	0.671909	CTRL
ACSL3	-0.697158	CTRL
CNOT7	-0.426466	CTRL
C1orf105	2.18349	CTRL
DEPDC5	-0.290196	CTRL
HIPK1	0.0179059	CTRL
SMIM3	2.87186	CTRL
FGF20	-2.16566	CTRL
SPAG4	-1.08655	CTRL
BRD2	-0.537304	CTRL
FAM151B	-0.457814	CTRL
APC	0.474058	CTRL
RBM15	-0.0895617	CTRL
SLC4A2	0.217947	CTRL
TRIM39	-0.188459	CTRL
VPS33B	-0.243421	CTRL
CLCN3	0.177933	CTRL
UBC	0.0772193	CTRL
SIDT2	-1.19668	CTRL
DLGAP1	0.462184	CTRL
RAB5B	0.0683129	CTRL
ALKBH5	-0.443822	CTRL
C14orf79	-0.225141	CTRL
FSTL3	0.693356	CTRL
PLCXD1	-0.907139	CTRL
MLLT10	-0.494673	CTRL
TIMM44	-0.603791	CTRL
CCND2	-0.982122	CTRL
HNRNPA2B1	-0.506726	CTRL
BHLHE40	0.380476	CTRL
FAM200B	-0.479233	CTRL
BOLA1	-0.897886	CTRL
RPGRIP1	-1.17463	CTRL
SPTY2D1	0.259171	CTRL
RTKN2	-0.976448	CTRL
SUN1	0.036421	CTRL
ANKRD2	4.52017	CTRL
IFI35	0.100318	CTRL
TMEM109	-0.265872	CTRL
FRRS1L	0.291409	CTRL
CD47	-0.452188	CTRL
SLC25A25	-0.299679	CTRL
LMLN	-0.166483	CTRL
SPTAN1	-0.247373	CTRL
ASPHD1	-0.480852	CTRL
TMEM80	-0.499787	CTRL
HMOX1	-0.17103	CTRL
CCDC159	0.364802	CTRL
ZDHHC2	-0.562896	CTRL
SIPA1L1	-0.547343	CTRL
DUSP28	-0.948117	CTRL
TMEM179B	-0.38127	CTRL
MAN1B1	-0.0690201	CTRL
NPB	-0.701716	CTRL
ZNF512B	0.191713	CTRL
TRPS1	0.182633	CTRL
RAB40C	-0.403106	CTRL
OCLN	-0.456888	CTRL
CCDC85B	-1.50931	CTRL
HIST1H2AB	-0.536268	CTRL
EEF1A1	0.148435	CTRL
CCDC120	-0.247107	CTRL
TEAD3	0.0470432	CTRL
KAT5	-0.386909	CTRL
HIST1H2BF	-0.850813	CTRL
KIF1B	-0.401723	CTRL
SLC16A6	-1.37962	CTRL
MAP3K8	0.526952	CTRL
CEBPB	-0.217656	CTRL
MTMR2	-0.598896	CTRL
PHF1	-0.471652	CTRL
YTHDF3	-0.652299	CTRL
CDK15	7.11619	CTRL
GABPB2	-0.118661	CTRL
ZFAND6	-1.16668	CTRL
CREB5	3.10386	CTRL
RUSC1	-0.483342	CTRL
GIPR	-1.77557	CTRL
VPS9D1	0.0157867	CTRL
KIF20B	-0.433534	CTRL
LRTOMT	-1.27109	CTRL
ARG2	1.02469	CTRL
HIST1H2AJ	-0.0679671	CTRL
KCTD20	-0.132411	CTRL
MEOX2	-0.867912	CTRL
TMEM129	-0.209474	CTRL
NT5DC4	0.166264	CTRL
DUSP1	0.224192	CTRL
MEPCE	-0.351752	CTRL
KLF10	-0.217074	CTRL
IFNAR2	-0.0592318	CTRL
PLEKHB2	-0.017069	CTRL
TUBB2A	-0.107394	CTRL
HIVEP2	-0.224756	CTRL
KCTD2	0.298936	CTRL
ARID1A	-0.60923	CTRL
BTBD16	1.77218	CTRL
CHEK1	-0.374025	CTRL
C19orf60	-0.906341	CTRL
MAST1	-1.17652	CTRL
DLX1	-1.45667	CTRL
ZNF771	-0.882497	CTRL
EFNA5	0.864513	CTRL
ZNF646	-0.0462166	CTRL
BIRC2	0.11249	CTRL
MIEF2	0.181431	CTRL
NEDD8-MDP1	-0.260787	CTRL
THAP3	-0.564611	CTRL
NUMBL	0.206366	CTRL
CREB3	0.167083	CTRL
ERF	-0.279624	CTRL
MYO9B	0.639338	CTRL
HSPA5	0.390415	CTRL
ERICH1	-0.30128	CTRL
FOXO3	0.542434	CTRL
UPK2	-1.4974	CTRL
HGSNAT	-0.242469	CTRL
HNRNPK	-0.101781	CTRL
FAM228B	-0.271029	CTRL
EEF2K	-0.155184	CTRL
C19orf57	-0.420293	CTRL
P4HTM	-0.235724	CTRL
UBE2B	-0.543849	CTRL
PLK4	-1.36146	CTRL
SAT1	1.20313	CTRL
CYB5B	-0.293841	CTRL
DAOA	-1.37534	CTRL
GPX4	-0.444417	CTRL
CBX8	-0.810836	CTRL
PDE4A	-1.48316	CTRL
ZNF276	-0.57824	CTRL
B3GNT3	-1.76273	CTRL
NRP1	0.892096	CTRL
CCDC28B	-1.22715	CTRL
ABCF3	-0.372122	CTRL
ANKHD1	-0.270898	CTRL
DLX2	-1.16051	CTRL
HSPB1	-0.235437	CTRL
DYRK3	1.05039	CTRL
GNL1	-0.626309	CTRL
DTL	-0.970453	CTRL
RAP2B	-0.385819	CTRL
FOSL2	0.778896	CTRL
LRCH3	0.15602	CTRL
SHOC2	-0.267318	CTRL
NUDT15	-0.398111	CTRL
CHRNA9	0.783681	CTRL
AMN1	-0.548671	CTRL
ID2	-0.199024	CTRL
TOM1L2	1.14618	CTRL
ATP5B	-0.422124	CTRL
ZNF678	-0.309256	CTRL
TLN1	-0.207223	CTRL
RNF11	0.339952	CTRL
ADNP2	-0.0576294	CTRL
DDX5	-0.104958	CTRL
HBP1	-0.572991	CTRL
CXADR	-0.747684	CTRL
DPEP1	0.31724	CTRL
KDELR2	0.264277	CTRL
MCM7	-0.803417	CTRL
STK19	-0.0156893	CTRL
FOS	-0.0913754	CTRL
TMEM87B	0.593453	CTRL
TDRD3	-0.875649	CTRL
PCIF1	-0.229593	CTRL
ATP1B1	0.798816	CTRL
IPO7	-0.525693	CTRL
EDEM1	1.1932	CTRL
PIP5K1A	-0.137805	CTRL
CTNND1	0.179946	CTRL
TP53I3	-0.305169	CTRL
FOXK2	-0.202561	CTRL
CPN1	-2.56772	CTRL
EFCAB5	0.906614	CTRL
MBD6	-0.659565	CTRL
FKBP2	-0.739162	CTRL
AEN	-0.298884	CTRL
TMEM144	-0.819497	CTRL
C14orf119	0.569151	CTRL
SLC39A13	0.408294	CTRL
RSAD1	0.266021	CTRL
TCP11L1	0.390956	CTRL
AKIRIN1	-0.30868	CTRL
CDKN1A	0.248408	CTRL
NIF3L1	-0.389249	CTRL
ERGIC1	0.172016	CTRL
NRBP1	-0.188302	CTRL
SLC5A11	-0.997986	CTRL
CGN	-1.49731	CTRL
PFAS	-0.0237865	CTRL
VASP	-0.683813	CTRL
PRRC2B	0.0235314	CTRL
EHD2	0.250181	CTRL
WTIP	-0.880849	CTRL
CLDN20	0.610947	CTRL
BCL3	0.768903	CTRL
MSANTD4	0.259041	CTRL
PLEKHG2	-0.961985	CTRL
WBP4	-0.49381	CTRL
HIST1H3G	-1.93345	CTRL
FBXO45	-0.860041	CTRL
MAML1	-0.0605276	CTRL
LRRC4	-0.440641	CTRL
CA11	-1.49003	CTRL
MYLPF	0.370309	CTRL
PPP1R14B	-0.246588	CTRL
TSC22D2	0.469707	CTRL
ZSCAN22	-0.2514	CTRL
CDC45	-1.37342	CTRL
DNAJC16	0.0958204	CTRL
COPZ2	-0.868172	CTRL
RNF7	-0.176063	CTRL
SP1	-0.243691	CTRL
SGIP1	-1.3145	CTRL
LAMC1	1.33889	CTRL
MAP3K12	-0.598956	CTRL
RAD54L2	0.170073	CTRL
ADGRV1	4.57465	CTRL
DDX3X	-0.00173456	CTRL
MCL1	-0.0161436	CTRL
HIST1H2BM	-0.733639	CTRL
CCR10	-0.814787	CTRL
ZC3H10	0.0199813	CTRL
SLC30A9	0.00795365	CTRL
NR4A3	-1.7986	CTRL
MICA	-1.18373	CTRL
PGF	2.12325	CTRL
HMOX2	-0.3383	CTRL
CDV3	0.298374	CTRL
FRS2	-0.352022	CTRL
MAP2K3	0.389672	CTRL
SPG7	-0.316933	CTRL
FAM162A	-0.845092	CTRL
HMMR	-1.4702	CTRL
CDKN3	-1.34544	CTRL
ATG13	0.0639293	CTRL
ADRM1	-0.784104	CTRL
TMEM167B	0.0986156	CTRL
PDXK	0.435005	CTRL
SOAT1	0.24976	CTRL
SLC8A2	-0.487473	CTRL
ANKHD1-EIF4EBP3	-0.361851	CTRL
TRIB1	-0.528935	CTRL
FAM71E1	0.619515	CTRL
FBRS	-0.769181	CTRL
SWSAP1	-0.575375	CTRL
ZNF839	-0.796002	CTRL
RPP25	-0.530613	CTRL
NFIB	-0.499046	CTRL
ABL1	-0.0847787	CTRL
PTTG1	-0.857704	CTRL
ZNF575	-0.928312	CTRL
TIGAR	0.304158	CTRL
DCST2	-0.571261	CTRL
TCF25	-0.14601	CTRL
SLC25A44	-0.323397	CTRL
TRIP10	0.223849	CTRL
CDS2	-0.118667	CTRL
PRMT9	-0.00764401	CTRL
METRNL	-0.644899	CTRL
DCAF4	-0.330141	CTRL
ARGLU1	-0.100071	CTRL
HIST1H4H	-0.0306912	CTRL
CCDC61	-0.431094	CTRL
DBN1	0.00409944	CTRL
FCN3	-0.964905	CTRL
SLC38A2	-0.0257904	CTRL
SCAF1	-0.133284	CTRL
APC2	-1.48706	CTRL
HIST1H2BD	-0.089701	CTRL
ARHGAP23	1.39414	CTRL
TMUB2	0.28695	CTRL
HMGA2	0.328107	CTRL
RAC2	3.09349	CTRL
YTHDF2	0.00100512	CTRL
CCDC18	-0.392836	CTRL
ARHGEF12	0.331516	CTRL
ZNF184	-0.231213	CTRL
DDX17	-0.12474	CTRL
TRAFD1	-0.170513	CTRL
PHF23	-0.251749	CTRL
APEX1	-0.148531	CTRL
TBC1D25	-0.551946	CTRL
CCDC9	-0.645025	CTRL
DAAM1	2.07069	CTRL
MOB3A	0.177366	CTRL
CEP57	-0.659724	CTRL
YAP1	0.180532	CTRL
ZFAND5	0.115251	CTRL
SCFD1	-0.328738	CTRL
HTT	-0.129011	CTRL
CAPN15	-0.0815672	CTRL
HMG20A	-0.0932434	CTRL
RPS4X	-0.136805	CTRL
LCMT1	0.0280581	CTRL
EGR2	-0.351775	CTRL
ELAVL1	-0.321869	CTRL
RHOQ	0.249611	CTRL
RBMS1	0.0508784	CTRL
CDT1	-1.17441	CTRL
ZCCHC7	0.132431	CTRL
RPL8	-0.309846	CTRL
MSRA	-0.241489	CTRL
MYH15	0.522162	CTRL
DCAF11	-0.441371	CTRL
TOB2	-0.0613379	CTRL
EIF3I	-0.142663	CTRL
NOCT	-0.057748	CTRL
TRAPPC12	-0.411803	CTRL
CNPY4	0.36598	CTRL
LSAMP	0.453749	CTRL
KMT2E	0.272307	CTRL
MASTL	-0.734019	CTRL
CLIC4	0.602892	CTRL
MRPL48	-0.38345	CTRL
FUNDC2	-0.479346	CTRL
TBCC	-0.786215	CTRL
SOCS3	0.96595	CTRL
UBA1	-0.247055	CTRL
GSG1	2.06599	CTRL
PAICS	-0.10423	CTRL
HNRNPA1	-0.328462	CTRL
TNPO1	-0.076323	CTRL
MAPRE1	-0.10096	CTRL
ZNF146	-0.0473612	CTRL
SKA3	-1.46615	CTRL
NPFFR1	1.71154	CTRL
TMEM39B	-0.739606	CTRL
NACC1	-0.290784	CTRL
C19orf24	-0.426931	CTRL
FGF14	-0.63584	CTRL
OTUD5	-0.442153	CTRL
HIC1	-0.700467	CTRL
PACRG	-1.34518	CTRL
KANK2	0.693497	CTRL
CDCA4	-0.0910773	CTRL
SNU13	-0.390373	CTRL
JUNB	-0.0566783	CTRL
IFFO1	3.03394	CTRL
CATSPERD	-3.98357	CTRL
CYHR1	-0.0622129	CTRL
GZF1	-1.29829	CTRL
PER1	-1.5471	CTRL
TUBA1C	0.725497	CTRL
NSMCE2	-0.162927	CTRL
CD300LB	6.14025	CTRL
NOP9	0.220872	CTRL
DCAF6	-0.194835	CTRL
UBE2O	-0.361042	CTRL
GFM2	0.0768461	CTRL
ZBTB1	-0.192499	CTRL
ACYP2	-0.333425	CTRL
C14orf80	-1.60099	CTRL
HDAC10	-0.485446	CTRL
SLC25A42	-0.375956	CTRL
CLEC11A	-0.726108	CTRL
REEP3	0.197022	CTRL
BLZF1	0.100852	CTRL
SETX	-0.325282	CTRL
RPS24	-0.147947	CTRL
ARHGDIA	-0.111042	CTRL
QPCTL	-0.569002	CTRL
RLF	-0.217558	CTRL
PRR11	-1.35299	CTRL
STXBP1	-0.529293	CTRL
UAP1	0.316184	CTRL
FANCG	-0.678898	CTRL
DNAJB5	-0.409658	CTRL
CNTROB	-0.729726	CTRL
KLHL14	-1.08284	CTRL
FZR1	0.0686688	CTRL
TNFSF9	2.04988	CTRL
FAM43A	0.0662561	CTRL
SAR1A	0.188453	CTRL
SUFU	0.025375	CTRL
SAE1	-0.311112	CTRL
TARBP2	-0.395248	CTRL
2020-09-07	-0.0534703	CTRL
RTN4	-0.380132	CTRL
EGR1	-0.5299	CTRL
WDFY1	-0.351131	CTRL
ZKSCAN5	-0.11043	CTRL
RING1	-0.0212983	CTRL
UQCRH	-0.66787	CTRL
TESK1	-1.29364	CTRL
PAIP2	-0.19014	CTRL
ISYNA1	-1.49685	CTRL
MAP2K7	-0.23525	CTRL
DCLRE1B	-0.182887	CTRL
PIM2	-0.835379	CTRL
ISCU	-0.0309486	CTRL
RCCD1	-0.521641	CTRL
VAMP2	-0.382217	CTRL
GNAT3	-0.0476885	CTRL
MEX3B	-0.28238	CTRL
MRPS33	-0.450082	CTRL
MAP3K14	0.297265	CTRL
GPX1	-0.0761404	CTRL
STAT6	0.727009	CTRL
SMPD2	-1.38021	CTRL
SLC50A1	-0.65759	CTRL
MUC12	2.326	CTRL
VMP1	-0.598306	CTRL
SPHK1	-0.330992	CTRL
IGSF8	0.791868	CTRL
OSBPL11	-0.0325074	CTRL
BROX	-0.0452949	CTRL
SEMA3C	1.48811	CTRL
JUND	-0.635616	CTRL
PPP2R5B	-0.12762	CTRL
CAMLG	-0.0438002	CTRL
SETDB1	-0.347499	CTRL
POLR3E	-0.337276	CTRL
PMF1-BGLAP	-0.0204739	CTRL
EML1	0.188282	CTRL
ATG16L2	-0.0929936	CTRL
FANCM	-0.403	CTRL
NF1	0.0851078	CTRL
RBPJ	0.625501	CTRL
NFYA	-0.224319	CTRL
DENR	-0.252405	CTRL
MYNN	-0.0330842	CTRL
VARS	0.0334981	CTRL
CNOT8	-0.35521	CTRL
TPP1	0.677565	CTRL
MGRN1	-0.0260444	CTRL
CTH	0.549334	CTRL
SPSB1	1.21252	CTRL
QRFP	-0.106075	CTRL
INSIG1	-0.469832	CTRL
ZFP64	-0.934975	CTRL
ZNF570	-0.616435	CTRL
SEMA6B	-0.438818	CTRL
HIST1H3E	0.0142268	CTRL
LMNB1	-0.712989	CTRL
RAB4B	-0.565851	CTRL
STOML2	-0.430083	CTRL
IRF2BPL	-0.223386	CTRL
SLC25A38	-0.131221	CTRL
APBB3	-1.37072	CTRL
PPM1G	-0.38994	CTRL
TNKS2	0.598689	CTRL
ATP5D	-0.51182	CTRL
PSMD11	-0.441792	CTRL
ANKRD42	0.228156	CTRL
HIST1H4J	0.402246	CTRL
NAP1L1	-0.380876	CTRL
BEST1	1.23399	CTRL
PPRC1	-0.453815	CTRL
WBP2	-0.479913	CTRL
B4GALT5	0.609666	CTRL
RNF13	-0.269803	CTRL
REXO1	-0.595686	CTRL
JADE1	0.00205809	CTRL
PPFIBP1	0.611993	CTRL
POLM	-0.184088	CTRL
ERC1	-0.464856	CTRL
SPRED1	0.0818219	CTRL
UQCR10	-0.680356	CTRL
ORAI1	-0.205338	CTRL
GADD45A	0.6498	CTRL
SP2	-0.194825	CTRL
PIK3CA	0.0875199	CTRL
ZEB2	1.61177	CTRL
MBD2	-1.04198	CTRL
MYO1F	-0.912159	CTRL
RPS10	-0.152553	CTRL
NUBP2	-0.163226	CTRL
PRNP	2.32841	CTRL
RAI1	-0.227471	CTRL
HIST1H2BE	-0.212945	CTRL
AP2B1	-0.156249	CTRL
BFAR	-0.0404081	CTRL
ZNF436	0.236078	CTRL
DDIAS	-0.746284	CTRL
GGA1	-0.364402	CTRL
RNF5	-0.643866	CTRL
POLR2A	-0.406368	CTRL
RAB11FIP5	1.21076	CTRL
BCAP31	0.0206859	CTRL
UBXN1	-0.174037	CTRL
CSNK1A1	-0.16457	CTRL
TNFAIP8L1	-0.334908	CTRL
DYRK1A	-0.307854	CTRL
TMEM165	0.146415	CTRL
ABT1	-0.956788	CTRL
PRCC	-0.43232	CTRL
GPRC5A	0.380477	CTRL
DBNDD1	0.264944	CTRL
CDC42EP5	0.565881	CTRL
FLYWCH2	-0.129672	CTRL
MED29	-0.114965	CTRL
SCYL2	-0.146984	CTRL
RPL37	-0.110287	CTRL
KMT2A	-0.206089	CTRL
AGAP3	-0.202998	CTRL
BAG3	0.054981	CTRL
EIF4EBP3	-1.87247	CTRL
NXF1	-0.509675	CTRL
FOXJ2	-0.475986	CTRL
CDC25A	-0.976714	CTRL
ZSCAN20	-0.280801	CTRL
NAF1	-0.218436	CTRL
PMF1	-0.227836	CTRL
SETD5	-0.31957	CTRL
CCND1	1.8073	CTRL
TIMM50	-0.325266	CTRL
C17orf49	-0.77908	CTRL
TULP2	-1.01448	CTRL
FLRT2	0.322889	CTRL
SMARCA5	0.118611	CTRL
UBE2S	-0.940055	CTRL
PPP1R37	0.708673	CTRL
EFNB2	-0.271676	CTRL
MLF 2.00	-0.615524	CTRL
EIF3J	-0.418465	CTRL
INO80E	-0.50882	CTRL
ZNF711	-0.217814	CTRL
PITPNB	0.00919603	CTRL
HNRNPH1	-0.209128	CTRL
CRB3	0.0749621	CTRL
CD59	2.45306	CTRL
GSTP1	0.0761328	CTRL
CLIP1	-0.16874	CTRL
HGF	0.812514	CTRL
NANS	0.231216	CTRL
MYL2	3.2137	CTRL
SAMD4A	1.44234	CTRL
HIST1H2AM	-0.504844	CTRL
VAPA	0.18302	CTRL
TMEM88	-2.05609	CTRL
NR2F2	-0.182735	CTRL
CENPF	-0.916578	CTRL
CEP44	-0.229047	CTRL
PRELID1	-0.488365	CTRL
NCS1	0.626046	CTRL
LMTK3	-0.333596	CTRL
SLC25A6	-0.2782	CTRL
CHMP1B	-0.928884	CTRL
SETD9	-0.128265	CTRL
NUBP1	-0.00308845	CTRL
PBX2	-0.0455098	CTRL
YOD1	-0.0601216	CTRL
NUP160	-0.0820169	CTRL
ENAH	0.62351	CTRL
TBCE	-0.0122602	CTRL
BRD4	-0.24356	CTRL
CHD1L	-0.272784	CTRL
DDX20	0.534339	CTRL
KPNA2	-0.396755	CTRL
RPS19BP1	-0.726846	CTRL
ZBTB12	-0.453262	CTRL
ATP1B3	-0.0358992	CTRL
FAH	-1.13405	CTRL
ATF4	-0.467338	CTRL
KBTBD2	-0.132569	CTRL
RNF34	-0.278603	CTRL
ZNF414	-0.268695	CTRL
EPC2	0.118242	CTRL
SLC29A1	0.67553	CTRL
DNAJC17	-0.536278	CTRL
RABGEF1	0.100383	CTRL
PAQR4	-1.31775	CTRL
TBKBP1	-0.092288	CTRL
HIST1H2BL	-1.18537	CTRL
MRPL57	-0.499274	CTRL
GLTPD2	-0.279415	CTRL
LRRC28	-0.697317	CTRL
PIPOX	0.818304	CTRL
FKBPL	-0.0395619	CTRL
FBXO21	-0.0702025	CTRL
ZNF365	0.7176	CTRL
ANGPTL4	2.26354	CTRL
PHF3	-0.154442	CTRL
COL5A3	3.26997	CTRL
H3F3B	-0.319745	CTRL
ATP8B2	1.04121	CTRL
FAM206A	-0.215759	CTRL
C7orf73	0.194851	CTRL
GYS1	-0.282838	CTRL
FAM214B	-0.614265	CTRL
TBL1X	-0.758749	CTRL
ITPRIP	0.264741	CTRL
CATSPERG	-0.87299	CTRL
SCD	-1.19101	CTRL
GBF1	0.0957987	CTRL
NPR 1.00	2.97463	CTRL
ZNF511	-0.650935	CTRL
FNDC3A	0.788599	CTRL
SSC4D	-0.70306	CTRL
GJA3	1.69087	CTRL
STAC3	-1.52349	CTRL
NOP10	-0.44129	CTRL
ADK	0.461036	CTRL
PPM1D	-0.572423	CTRL
HNRNPF	-0.0850172	CTRL
SYNCRIP	0.0425432	CTRL
KDM3A	-0.537035	CTRL
ZC3H7B	0.371757	CTRL
PRR12	-0.502428	CTRL
ATF7IP	-0.273706	CTRL
AMPD2	-0.307179	CTRL
CHUK	-0.487938	CTRL
NR1D2	0.65874	CTRL
NSUN4	-0.097423	CTRL
AP1S3	-0.25505	CTRL
PUM1	0.0314072	CTRL
DPM2	-0.0799293	CTRL
APOM	-0.0536274	CTRL
ZFAND2A	-0.417003	CTRL
ARHGEF39	-1.42366	CTRL
CHAF1A	-0.769112	CTRL
DDX19A	-0.0983732	CTRL
SH3D21	-0.512864	CTRL
SEMA4C	0.122272	CTRL
OR2W3	-0.436021	CTRL
ZNF213	-0.217311	CTRL
BCL2L2	-0.330559	CTRL
F2RL1	-0.447785	CTRL
CSPP1	0.167163	CTRL
CXXC1	-0.169229	CTRL
TDG	-0.460429	CTRL
NINJ2	4.73366	CTRL
CACNG8	-0.0651427	CTRL
UBR7	-0.579894	CTRL
SYNPO2	-0.545946	CTRL
MVK	-0.500047	CTRL
AVL9	-0.376911	CTRL
ARHGEF10	-0.265297	CTRL
CEP95	-1.01943	CTRL
ING1	-0.905931	CTRL
FGF18	-1.22007	CTRL
LASP1	0.236995	CTRL
KBTBD3	0.296613	CTRL
ANKRD17	-0.0658847	CTRL
RPL4	-0.139021	CTRL
ISG15	-0.161495	CTRL
ITSN1	0.0561653	CTRL
RPN1	-0.0140031	CTRL
RTN3	-0.508721	CTRL
TRIM22	3.48887	CTRL
FAM189B	-0.0840415	CTRL
SIAH1	-0.0836009	CTRL
RPS16	-0.490578	CTRL
EMD	0.214099	CTRL
PLK3	-0.149723	CTRL
EIF2S3	-0.0802992	CTRL
NPRL2	-0.149342	CTRL
SSTR3	3.68538	CTRL
ARL 2.00	-0.362787	CTRL
MOGAT3	5.15644	CTRL
KLHL4	-0.913472	CTRL
NALCN	0.0864855	CTRL
CYB5D2	0.126776	CTRL
P3H3	-0.172706	CTRL
THRAP3	-0.0704624	CTRL
CLCN6	-0.197203	CTRL
NFE2	1.52958	CTRL
IGFBP6	1.04499	CTRL
RAB11B	-0.467838	CTRL
GPR4	-0.443095	CTRL
HIST1H1C	-2.27474	CTRL
L2HGDH	-0.352301	CTRL
MPV17L2	-0.405049	CTRL
FCHO1	-0.735649	CTRL
RXRA	0.0942858	CTRL
C2orf42	-0.255513	CTRL
LEMD3	-0.484306	CTRL
EIF6	-0.0446634	CTRL
NAA38	-1.06333	CTRL
ARID2	-0.384179	CTRL
DUS4L	0.133959	CTRL
CCDC138	-0.491722	CTRL
CTIF	0.157719	CTRL
FIS1	-0.17196	CTRL
EFNA3	-0.882382	CTRL
C4orf47	-0.601767	CTRL
AP1M1	-0.162311	CTRL
GAS2L3	-0.00311746	CTRL
RGS21	-0.222684	CTRL
TMEM256-PLSCR3	0.15636	CTRL
WDR37	0.451508	CTRL
ARHGEF40	0.426084	CTRL
MAN2A1	0.349913	CTRL
TDP1	0.0558511	CTRL
COX20	-0.345436	CTRL
RGS1	0.636589	CTRL
UVSSA	-0.487861	CTRL
XPO4	-0.1389	CTRL
SALL4	-1.01166	CTRL
ARHGEF19	-0.0935139	CTRL
EXOSC2	-0.351512	CTRL
KHNYN	0.140946	CTRL
USP11	-0.593499	CTRL
CYLD	0.996561	CTRL
SYP	-1.37723	CTRL
ARHGAP35	0.0185172	CTRL
TAPBP	0.178459	CTRL
CLSPN	-0.444741	CTRL
KIF11	-1.19775	CTRL
ARAP1	0.222883	CTRL
CPA2	6.53732	CTRL
DNAI1	-0.593901	CTRL
FAM76B	-0.826384	CTRL
KLF6	0.886391	CTRL
ZNF138	-0.296829	CTRL
WDR18	-0.604707	CTRL
DNM1	-0.394748	CTRL
ROMO1	-0.731821	CTRL
LHX1	2.68711	CTRL
SERTAD1	-0.523103	CTRL
JMJD4	0.10086	CTRL
TTLL4	0.0881413	CTRL
ZNF143	-0.297926	CTRL
BCOR	-0.257951	CTRL
SLC45A1	-0.524123	CTRL
SF3A1	-0.326232	CTRL
WNK1	-0.0271249	CTRL
SRP54	0.00085833	CTRL
PANK2	-0.162019	CTRL
PPIG	-0.170393	CTRL
HSCB	-0.149995	CTRL
SEC24C	0.128563	CTRL
HCN2	-0.418298	CTRL
COPS4	-0.049057	CTRL
DDIT3	-1.30956	CTRL
RFC4	-0.598114	CTRL
PHPT1	-0.298081	CTRL
CDC14A	-0.508566	CTRL
RBMXL1	-0.00886906	CTRL
FAM167B	0.866202	CTRL
RASIP1	-2.06915	CTRL
OXSM	-0.0937922	CTRL
NUSAP1	-1.39538	CTRL
ATP6V0E1	0.126081	CTRL
CEBPG	-0.358134	CTRL
PPP1R16A	-0.595302	CTRL
TKFC	-0.53873	CTRL
DDX49	-0.415784	CTRL
MDS2	-0.717539	CTRL
SOCS7	-0.343456	CTRL
DOT1L	-0.220551	CTRL
JOSD1	-0.236552	CTRL
HIST1H2AK	0.595473	CTRL
WDR19	-0.617602	CTRL
PDE8A	-0.921768	CTRL
DNAH7	0.0277483	CTRL
JAK1	0.810539	CTRL
FAM136A	-0.230611	CTRL
HCN3	-1.29252	CTRL
BTBD19	0.457374	CTRL
ST8SIA6	-0.704582	CTRL
ENOPH1	-0.550191	CTRL
ZNF517	-0.372357	CTRL
BBS9	-0.589788	CTRL
YBX3	-0.0787797	CTRL
ESF1	-0.262983	CTRL
TRMT61A	-0.440498	CTRL
SNX1	0.0976664	CTRL
ARMC5	-0.743693	CTRL
SH3GL3	-2.07892	CTRL
ACADVL	-0.428548	CTRL
CYP2W1	0.238037	CTRL
ANAPC16	-0.0457152	CTRL
ARIH2	-0.0969575	CTRL
BLOC1S4	-0.193663	CTRL
SERPINE1	9.02291	CTRL
TRAF3	0.097228	CTRL
ZNRF4	-0.252131	CTRL
CEP55	-1.07807	CTRL
CD82	4.42643	CTRL
TBX2	-0.475659	CTRL
FAM46B	0.809713	CTRL
ATG101	-0.326514	CTRL
AKAP8L	-0.336844	CTRL
CDK4	-0.0514515	CTRL
RSL1D1	-0.230459	CTRL
PLEKHA4	0.756024	CTRL
BCLAF1	0.0600041	CTRL
GLS	0.149697	CTRL
MRPS30	-0.585824	CTRL
CHD9	0.117755	CTRL
FLOT1	0.217801	CTRL
TMEM187	0.290187	CTRL
HNRNPC	-0.10454	CTRL
GOT1	-1.04217	CTRL
SPSB2	-0.38766	CTRL
ATCAY	-0.913615	CTRL
GLRX3	0.263976	CTRL
HNRNPUL1	-0.206424	CTRL
PANO1	-1.09527	CTRL
FBXO24	-0.306683	CTRL
AGFG2	0.474745	CTRL
USP38	0.195536	CTRL
KCNJ11	-1.96015	CTRL
RAB33B	-0.575693	CTRL
ZNF576	-0.672752	CTRL
HNRNPL	-0.316742	CTRL
DSTN	-0.0374109	CTRL
AFTPH	0.0745252	CTRL
LDHD	-0.673952	CTRL
NCDN	0.0922617	CTRL
MPZL1	0.525729	CTRL
GCG	-1.88771	CTRL
UBB	0.256836	CTRL
ALDH16A1	-0.666121	CTRL
AKIP1	0.635784	CTRL
NUDT4	1.32676	CTRL
RAB11FIP3	-0.0946592	CTRL
RNASEK-C17orf49	-0.482366	CTRL
AP2M1	0.517103	CTRL
SAC3D1	-0.273489	CTRL
UQCRQ	-0.462321	CTRL
TTI2	0.106617	CTRL
PSMB3	-0.651121	CTRL
YWHAG	0.0813743	CTRL
QKI	-0.169633	CTRL
IQCH	0.282048	CTRL
APOLD1	0.142841	CTRL
ING5	-0.483171	CTRL
MXD3	-1.44139	CTRL
EIF5A	-0.373905	CTRL
XKR8	-0.0609558	CTRL
FBXO33	-0.116472	CTRL
RIN1	-0.197853	CTRL
SLC35G6	-1.93599	CTRL
HERPUD1	0.91237	CTRL
ABCE1	-0.0423204	CTRL
TRIM41	-0.41326	CTRL
NDUFS5	-0.50189	CTRL
NOTCH4	0.0459371	CTRL
RNF139	0.293575	CTRL
SLC35A5	0.0163897	CTRL
TSEN54	-0.295409	CTRL
UBE2R2	0.0429528	CTRL
CREB3L4	0.256626	CTRL
EFR3B	-0.04812	CTRL
CARHSP1	0.170754	CTRL
PHF5A	-0.449842	CTRL
SLC20A1	2.9835	CTRL
PIANP	-1.13086	CTRL
ACTB	0.314675	CTRL
GABPA	-0.719594	CTRL
PSMD9	-0.0297261	CTRL
BCAS3	-0.476952	CTRL
RDH12	-0.477123	CTRL
RAB10	0.383813	CTRL
NKIRAS2	-0.396186	CTRL
PFDN1	0.244634	CTRL
C19orf38	-0.832742	CTRL
PPIL2	-0.262412	CTRL
SFXN3	1.30528	CTRL
TDP2	-0.128228	CTRL
NXT1	-0.701705	CTRL
TINAG	0.631791	CTRL
ZC3H15	-0.115872	CTRL
SAMD8	-0.31467	CTRL
GMPR2	-0.226579	CTRL
DIDO1	-0.192365	CTRL
SLC38A7	0.0735498	CTRL
APLF	0.0586159	CTRL
KLF13	-0.962441	CTRL
EIF4A1	-0.333592	CTRL
SIRT7	-0.199511	CTRL
HMGCR	-0.36943	CTRL
CDCA2	-1.00532	CTRL
NBEAL2	-0.513013	CTRL
DZIP3	-0.30252	CTRL
SMG6	0.164382	CTRL
PDE6A	1.39688	CTRL
REXO4	-0.109589	CTRL
CD9	1.69005	CTRL
MAP1A	0.592072	CTRL
ZBTB43	0.123719	CTRL
KIAA0391	-0.254733	CTRL
INPP5K	0.163271	CTRL
SNAPC2	-0.741904	CTRL
ZNF609	-0.125136	CTRL
METTL23	0.325447	CTRL
SLC27A1	0.0311029	CTRL
FYTTD1	0.0126109	CTRL
ATOX1	-0.400018	CTRL
LRRC8A	0.492121	CTRL
PAPD7	-0.578027	CTRL
CMIP	-0.362267	CTRL
IMPDH2	0.33674	CTRL
SYNGR3	-1.24988	CTRL
RPS6KA4	-0.320718	CTRL
PGP	-0.851541	CTRL
SLC7A6	-0.0400586	CTRL
ATL1	-0.658168	CTRL
CWC27	-0.487802	CTRL
TMEM143	-0.350217	CTRL
NF2	0.624325	CTRL
RAB24	-0.802602	CTRL
EVI5L	0.379684	CTRL
ARID4A	-0.422246	CTRL
SRSF3	-0.392907	CTRL
SURF1	-0.262994	CTRL
RRP36	-0.157701	CTRL
TTPA	-2.11473	CTRL
YTHDC2	0.103205	CTRL
AMD 1.00	0.759628	CTRL
IGF2BP1	-0.118095	CTRL
CRTAP	0.456876	CTRL
GAL3ST4	-0.172005	CTRL
ZDHHC5	0.0957047	CTRL
HES4	-1.53543	CTRL
PABPN1	-0.523027	CTRL
ZBTB41	-0.290028	CTRL
NUDCD2	-0.952809	CTRL
RHOD	4.7651	CTRL
UBE3C	0.0950568	CTRL
ADO	-0.0493541	CTRL
SORL1	-0.317428	CTRL
FNIP1	0.000172521	CTRL
TSPYL2	-1.11905	CTRL
PTDSS2	-0.103508	CTRL
KIF5A	-0.158814	CTRL
DRC3	0.415885	CTRL
FSCN1	0.386883	CTRL
CNOT3	-0.545368	CTRL
BSG	0.143914	CTRL
UTP15	-0.233471	CTRL
RPRD2	-0.173774	CTRL
MLLT11	-0.522896	CTRL
CXorf40A	-0.0883257	CTRL
HBEGF	1.29348	CTRL
AARD	-1.58374	CTRL
HIST1H2AC	0.489538	CTRL
FBXL14	-0.865642	CTRL
KCNC3	-1.43917	CTRL
RPS27	0.0129956	CTRL
SLIT2	0.445088	CTRL
THOP1	-0.43655	CTRL
AASDHPPT	-0.0240115	CTRL
ZNF784	-0.495892	CTRL
WDR6	-0.412972	CTRL
ACSS1	3.46274	CTRL
ZNF628	-0.506776	CTRL
ZFAND3	0.0550455	CTRL
ZC3H12A	0.915223	CTRL
ZNF781	-1.47662	CTRL
MINOS1-NBL1	0.110932	CTRL
SPATA32	-0.507491	CTRL
URM1	-0.160544	CTRL
ECT2	-0.541947	CTRL
ABCA7	-0.527866	CTRL
B3GALT4	-0.799015	CTRL
ICAM5	-0.810594	CTRL
NUTF2	-0.223464	CTRL
HMGA1	-0.0542035	CTRL
LRRFIP1	0.641428	CTRL
FBXL8	-0.362014	CTRL
LYRM1	-0.326705	CTRL
LDHA	-0.187087	CTRL
IL3RA	-0.84907	CTRL
SLC35A4	-0.289939	CTRL
EXD3	-0.0418786	CTRL
EOMES	-0.330907	CTRL
MAPK1IP1L	-0.259466	CTRL
FZD3	0.491446	CTRL
CCDC178	-0.469975	CTRL
RP2	0.223114	CTRL
DUSP5	2.604	CTRL
OXNAD1	-0.290465	CTRL
SHKBP1	-0.0480678	CTRL
CSMD1	0.164819	CTRL
CACFD1	-0.129898	CTRL
OSTC	0.223508	CTRL
ATP5G1	-0.446892	CTRL
REPIN1	0.579454	CTRL
FAIM	0.13286	CTRL
EFHC1	-0.217645	CTRL
BTAF1	0.12086	CTRL
SMCHD1	-0.0629404	CTRL
SRSF10	-0.324891	CTRL
TYMP	-0.517791	CTRL
MRPL1	-0.374239	CTRL
ARPC5L	-0.708116	CTRL
PRDX6	0.806137	CTRL
MNT	-0.85185	CTRL
SLC25A41	-0.827834	CTRL
AP4S1	0.0552805	CTRL
KCTD3	0.381583	CTRL
RSRC2	-0.403843	CTRL
PARP6	-0.245533	CTRL
NEURL4	-0.541125	CTRL
FRAT2	-0.191599	CTRL
UBE2D3	-0.0952832	CTRL
RAB7A	-0.345818	CTRL
AVPI1	-0.103465	CTRL
C11orf68	-0.0055738	CTRL
STRAP	0.0981806	CTRL
MID1	-1.12043	CTRL
RPS6	-0.300144	CTRL
SPATS2	0.302503	CTRL
ADSSL1	-0.909827	CTRL
KARS	-0.20455	CTRL
SYNGR4	0.388392	CTRL
PFN1	-0.743313	CTRL
PPT2	0.194289	CTRL
YDJC	-0.375823	CTRL
ATXN2L	-0.531575	CTRL
MZT2B	-0.223057	CTRL
IRF7	1.06229	CTRL
JMJD1C	-0.346732	CTRL
FAM69B	-1.01723	CTRL
WDR43	0.0787066	CTRL
LRRC25	2.17761	CTRL
SRGAP3	0.466306	CTRL
ZNF281	-0.297354	CTRL
ZNF639	-0.183566	CTRL
DDX21	-0.167554	CTRL
PLAUR	0.0192846	CTRL
SLK	-0.40975	CTRL
PDS5A	-0.688132	CTRL
KLF16	-0.882318	CTRL
G6PC3	-0.476109	CTRL
SMIM19	-0.554586	CTRL
WIPF2	-0.0618695	CTRL
TTLL3	-0.709035	CTRL
KLHL12	-0.111939	CTRL
NEDD8	-0.262005	CTRL
PSMD3	-0.0992727	CTRL
GNGT2	5.45888	CTRL
STX12	-0.139965	CTRL
HIGD1B	-0.316257	CTRL
HES1	0.0493612	CTRL
ZNF250	0.328202	CTRL
BLOC1S3	-0.28722	CTRL
MAPKBP1	0.0108598	CTRL
VPS37A	-0.788114	CTRL
TLK2	0.104834	CTRL
UBXN8	-0.291753	CTRL
C19orf35	-4.21335	CTRL
RAB9A	-0.00337923	CTRL
SLC10A3	0.549839	CTRL
ATF1	-0.14217	CTRL
ARHGAP33	-0.961895	CTRL
BAG2	0.378518	CTRL
PPP1CB	0.00992067	CTRL
GTPBP3	-0.664906	CTRL
THPO	0.989067	CTRL
TTYH3	0.416868	CTRL
GIGYF1	-0.0298356	CTRL
C7orf55-LUC7L2	-0.209326	CTRL
DUSP7	1.17408	CTRL
GOLGA3	-0.12963	CTRL
CDC37L1	0.032878	CTRL
HGS	0.28664	CTRL
UVRAG	0.0144878	CTRL
C6orf58	-0.465964	CTRL
CYB5D1	-0.699024	CTRL
SRP72	0.0834035	CTRL
ANKRD50	0.630544	CTRL
ORMDL2	0.250589	CTRL
DDX50	-0.184667	CTRL
PPP6R3	-0.404554	CTRL
ZNF335	-0.667714	CTRL
ERBB2	0.209548	CTRL
MAPK8IP3	-0.144054	CTRL
TRAPPC13	-0.339726	CTRL
CDKN2D	-0.81126	CTRL
TEAD1	0.488497	CTRL
STIP1	-0.241591	CTRL
MRPS16	-0.372772	CTRL
BDP1	-0.27432	CTRL
CBX6	-0.344107	CTRL
DKKL1	-1.37661	CTRL
2020-03-09	-0.360005	CTRL
H2AFZ	-0.842346	CTRL
SACM1L	-0.394869	CTRL
HMG20B	-0.73371	CTRL
SUPT7L	-0.191992	CTRL
CAPZA1	0.0753399	CTRL
TBC1D10A	-0.342377	CTRL
TP53INP2	0.614063	CTRL
SMCO1	-1.72288	CTRL
TRNP1	1.81216	CTRL
C20orf202	-1.13781	CTRL
PLAU	5.38496	CTRL
PIKFYVE	-0.181192	CTRL
ABCC1	0.499781	CTRL
STAM	-0.00277397	CTRL
WDR25	0.982458	CTRL
TMEM161A	-0.40042	CTRL
CNIH2	-1.40969	CTRL
NOC2L	-0.397523	CTRL
GADD45GIP1	-0.460963	CTRL
LZTS2	0.19185	CTRL
FAM221B	-1.07558	CTRL
RANGRF	-0.299725	CTRL
LUC7L2	-0.62061	CTRL
SAP30	-0.0995177	CTRL
ZBTB47	1.22182	CTRL
EMC9	-0.662314	CTRL
TMEM107	-0.891366	CTRL
SOX12	-0.465428	CTRL
WNK3	0.0959248	CTRL
CHMP4B	0.123735	CTRL
P2RY11	-0.809554	CTRL
2020-03-02	-0.0260868	CTRL
MPG	-0.435925	CTRL
RPL22L1	0.199811	CTRL
E2F3	-0.44099	CTRL
EIF1B	-0.363486	CTRL
CYB561D2	0.115742	CTRL
ACOT13	-0.963078	CTRL
ZNF277	0.0355597	CTRL
PTOV1	-0.113955	CTRL
GSE1	-0.431094	CTRL
HIST2H3D	-0.672895	CTRL
TSHZ2	0.27573	CTRL
HABP4	-1.01101	CTRL
NFKBIA	0.105729	CTRL
KLHL18	-0.336699	CTRL
MTDH	0.21743	CTRL
SNRPE	-0.131996	CTRL
BNIP1	-0.320049	CTRL
ADAMTS1	-1.39107	CTRL
SNUPN	-0.764362	CTRL
RHOB	0.503863	CTRL
WDR54	-0.404677	CTRL
RMI1	-0.462554	CTRL
LSM 3.00	-0.499763	CTRL
PEX13	-0.430121	CTRL
PCBP1	-0.211611	CTRL
SLC27A2	7.98799	CTRL
ABCB8	0.0844168	CTRL
POP5	0.00423393	CTRL
INTS5	0.130162	CTRL
LIMA1	2.54851	CTRL
TRIM58	-0.923836	CTRL
ABCB9	0.229576	CTRL
SBK2	2.89261	CTRL
RPL7L1	-0.0664929	CTRL
KLHDC2	-0.275173	CTRL
KIAA1328	0.19977	CTRL
STKLD1	-0.626857	CTRL
FUT6	-2.29042	CTRL
EDN2	6.02138	CTRL
SNRPA	-0.645728	CTRL
CSE1L	-0.277928	CTRL
MBLAC1	-0.616609	CTRL
EFHD2	1.01617	CTRL
METTL17	-0.196895	CTRL
RPL26	-0.0846528	CTRL
ADPRHL1	-0.695552	CTRL
HMCES	-0.557827	CTRL
KIAA0556	-0.130526	CTRL
BICD1	0.672892	CTRL
NCAPH2	-0.623044	CTRL
MAST3	-0.401341	CTRL
GLIS2	0.308066	CTRL
VTA1	-0.500366	CTRL
GRIN2D	0.346931	CTRL
RPL26L1	-0.264241	CTRL
PACS2	0.132826	CTRL
DGCR8	-0.0519019	CTRL
PAFAH1B1	-0.205712	CTRL
HSDL2	-0.225912	CTRL
ARL13B	-0.282662	CTRL
PHGDH	-0.232455	CTRL
RPL3	-0.116569	CTRL
EXOSC8	-0.631576	CTRL
BLOC1S1	-0.165685	CTRL
LRRC37B	-0.99549	CTRL
TFG	-0.0432757	CTRL
TPM2	-0.126357	CTRL
ZC3H14	-0.208561	CTRL
TXLNG	-0.341511	CTRL
PYROXD2	1.36022	CTRL
SUCO	-0.685876	CTRL
BAG6	-0.532797	CTRL
ODF3L2	-0.890051	CTRL
CNST	-0.0897191	CTRL
C1QTNF6	1.41946	CTRL
LIG3	-0.853617	CTRL
STX1B	0.258546	CTRL
SON	-0.197194	CTRL
HSPA1A	-0.0539506	CTRL
SNAP29	-0.00802419	CTRL
HIST4H4	-0.584765	CTRL
RAC1	-0.25076	CTRL
G3BP1	0.201967	CTRL
DMXL1	0.0656141	CTRL
SLC25A3	-0.407341	CTRL
SNRPD3	-0.321373	CTRL
NDFIP1	-0.0489412	CTRL
HSP90AB1	-0.0743601	CTRL
PTMA	-0.488043	CTRL
NFE2L1	-0.258103	CTRL
HHLA2	-0.56259	CTRL
FBXO34	-0.55811	CTRL
HAX1	-0.428295	CTRL
SLX4IP	-0.119299	CTRL
COL4A3BP	0.017521	CTRL
RPIA	-0.651289	CTRL
DNAJC6	-0.664685	CTRL
LIN52	0.00732358	CTRL
PSMA3	-0.145511	CTRL
SLC39A9	-0.133278	CTRL
VPS13A	-0.317906	CTRL
OPTC	1.05474	CTRL
PSMG2	-0.058697	CTRL
ACTG1	0.10823	CTRL
MICALCL	5.77309	CTRL
TATDN3	0.180357	CTRL
ARF1	-0.121574	CTRL
DPAGT1	-0.35495	CTRL
COPS8	0.125196	CTRL
ZPR1	-0.239316	CTRL
OBSL1	-0.208692	CTRL
SRD5A3	-0.448396	CTRL
NSA2	-0.158671	CTRL
MDM4	-0.460833	CTRL
AIMP2	-0.547888	CTRL
JKAMP	0.095988	CTRL
2020-03-07	0.0312982	CTRL
ARHGEF17	0.0946804	CTRL
GABARAP	-0.000256033	CTRL
GMCL1	-0.425186	CTRL
MRPL40	-0.638448	CTRL
SLC39A14	0.572382	CTRL
CMPK1	0.307139	CTRL
OR2T8	-0.786116	CTRL
XPO7	-0.181875	CTRL
DNAJC1	-0.951375	CTRL
MRI1	-0.171226	CTRL
TTC24	0.197149	CTRL
LAPTM4B	0.424764	CTRL
SYNGAP1	-0.589802	CTRL
SOX4	-0.243702	CTRL
RPS5	0.112476	CTRL
UXT	0.0575325	CTRL
CCDC28A	-0.425609	CTRL
RITA1	0.0743308	CTRL
ATAD3B	-0.33136	CTRL
ZNF432	-0.308215	CTRL
ECSIT	-0.724884	CTRL
CCDC171	-0.944145	CTRL
IGFBP2	0.963914	CTRL
ZNF410	-0.104695	CTRL
TSPAN4	0.545906	CTRL
GARS	-0.751624	CTRL
MGAT5	0.646398	CTRL
EIF3H	-0.709352	CTRL
ARAF	-0.271672	CTRL
CKB	-0.935921	CTRL
DST	1.0896	CTRL
TPX2	-1.07829	CTRL
WIZ	-0.0845692	CTRL
SRCIN1	-0.400097	CTRL
TIMM22	-0.341531	CTRL
ARL8B	0.13392	CTRL
MAP1B	0.773546	CTRL
S1PR2	0.0926382	CTRL
RDH5	2.31352	CTRL
CDC42EP2	0.254176	CTRL
PIGV	0.0880627	CTRL
SKIDA1	-1.01197	CTRL
COX7A2L	-0.0884391	CTRL
HIST1H1D	-3.19411	CTRL
CDC5L	0.108769	CTRL
TYW3	-0.29043	CTRL
CBY1	-0.271426	CTRL
USO1	-0.00599228	CTRL
NADSYN1	-0.0252009	CTRL
ARL5B	-0.369392	CTRL
CADM4	-0.635941	CTRL
PIK3C2A	-0.131034	CTRL
PSMA1	-0.237619	CTRL
ETFDH	-0.777311	CTRL
TTC3	0.299259	CTRL
PRKAA1	-0.0263704	CTRL
TMEM198	-0.336355	CTRL
TUBD1	-1.03018	CTRL
ANKRD44	1.77212	CTRL
UFM1	0.106823	CTRL
CMTM1	-0.155076	CTRL
DMPK	-0.805877	CTRL
TXNL4A	-0.294957	CTRL
CHMP2B	-0.0588733	CTRL
ILF3	-0.361712	CTRL
PPM1A	0.0635431	CTRL
WRB	-0.550677	CTRL
GRAP	2.13909	CTRL
YWHAH	-0.108878	CTRL
HMGB2	-1.19259	CTRL
POLR2K	-0.23346	CTRL
RUVBL2	-0.280253	CTRL
EIF4G3	0.0624203	CTRL
MRPL20	-0.488078	CTRL
PRX	-1.01131	CTRL
MGAT2	0.233029	CTRL
BCL2L11	0.92886	CTRL
MAFG	-0.377665	CTRL
MLEC	0.392417	CTRL
PNKD	-0.414382	CTRL
RAB39B	-1.14242	CTRL
CKAP2	-0.0455432	CTRL
PPP2R5A	0.661373	CTRL
MTMR11	0.237505	CTRL
BRCC3	-0.613309	CTRL
BEND6	3.50827	CTRL
KCNAB2	0.0772785	CTRL
UTP3	-0.906531	CTRL
GTF3C4	-0.196513	CTRL
RAB13	0.547913	CTRL
ASL	0.279073	CTRL
MAMSTR	-1.30032	CTRL
TRIOBP	0.613547	CTRL
ZNF547	-0.147918	CTRL
DDX39A	-0.653944	CTRL
UCHL3	-0.140031	CTRL
NFATC3	0.0532931	CTRL
RGS2	-0.808725	CTRL
RARG	-0.426374	CTRL
RPAIN	-0.731488	CTRL
HMBOX1	-0.399406	CTRL
ERP29	-0.313209	CTRL
CKS2	-1.19088	CTRL
RPL3L	-1.3551	CTRL
TROVE2	-0.377248	CTRL
SPR	-0.446786	CTRL
EYS	-0.348212	CTRL
ZEB1	0.122248	CTRL
GPKOW	-0.487818	CTRL
ACO2	-0.70616	CTRL
AGMO	-1.01764	CTRL
PRR14	-0.742898	CTRL
C1orf50	0.098759	CTRL
TMEM14A	-0.806658	CTRL
FAM96B	-0.262517	CTRL
SPRYD3	0.524271	CTRL
CASC10	0.0467598	CTRL
CD2BP2	-0.559034	CTRL
FLVCR1	-1.1476	CTRL
IL34	3.99264	CTRL
PAGR1	-0.892125	CTRL
DDX19B	-0.121607	CTRL
RAD50	0.0227782	CTRL
HSPA8	-0.372286	CTRL
SLC23A3	0.618551	CTRL
HIST1H4E	0.444352	CTRL
CEBPZ	-0.300154	CTRL
TMEM51	1.36422	CTRL
RABEPK	-0.0423331	CTRL
CCDC30	0.402875	CTRL
ATP1A1	0.273503	CTRL
PPP1R9B	-0.402755	CTRL
NFE2L2	-0.0371759	CTRL
RTKN	0.0242315	CTRL
C9orf172	-0.625276	CTRL
PRPF4	-0.169671	CTRL
NBEA	-0.231373	CTRL
CDCA8	-1.22805	CTRL
RAB1B	-0.310674	CTRL
PDE4B	-0.275688	CTRL
PNPLA6	-0.284317	CTRL
EIF2S1	0.108602	CTRL
QARS	-0.0710312	CTRL
RPL13	-0.181584	CTRL
ANXA4	0.560405	CTRL
RPS28	-0.311075	CTRL
MCM3	-0.626073	CTRL
TBC1D22B	0.135924	CTRL
PFKP	-0.0153221	CTRL
NIT1	-0.0856316	CTRL
SYAP1	-0.290663	CTRL
ZNF700	-0.763194	CTRL
IFT52	-0.259529	CTRL
PPWD1	-0.0644382	CTRL
SRSF8	-0.213446	CTRL
WDR47	-0.115677	CTRL
HIST1H2AH	-1.46738	CTRL
SHISA7	-1.33556	CTRL
HACD3	-0.0780245	CTRL
NIPAL3	0.966862	CTRL
ZNF429	0.108133	CTRL
USP35	0.165361	CTRL
SAMD4B	-0.320296	CTRL
UMPS	-0.201319	CTRL
RGP1	-0.0546742	CTRL
KAT7	-0.00974098	CTRL
CASC3	-0.274933	CTRL
CAP1	0.426523	CTRL
ZNF140	-0.447448	CTRL
GLRX5	-0.257736	CTRL
DPM3	-0.831099	CTRL
SIRT5	-0.38746	CTRL
PRPS1	0.185901	CTRL
PERP	1.61925	CTRL
FOXRED1	-0.275765	CTRL
TCF3	-0.299416	CTRL
IGFN1	8.70042	CTRL
TBPL1	-1.04573	CTRL
UBFD1	-0.255872	CTRL
CFAP61	-0.992158	CTRL
PSMD14	-0.318403	CTRL
SYT3	0.355993	CTRL
NME7	0.242899	CTRL
NUP205	-0.079375	CTRL
FAM89B	-0.609968	CTRL
DXO	-0.73203	CTRL
ADGRB1	-0.649657	CTRL
ZSWIM4	0.0735967	CTRL
CNNM2	-0.249753	CTRL
C12orf57	-0.679433	CTRL
SCAMP3	-0.26053	CTRL
TMEM43	0.496979	CTRL
ETNK1	-0.157562	CTRL
DNAJC5	0.238174	CTRL
SLC8B1	0.48541	CTRL
MDM2	0.586238	CTRL
HIST2H3PS2	-0.747341	CTRL
C7orf43	-0.399922	CTRL
OR14K1	1.41723	CTRL
STAG2	-0.270599	CTRL
SESN2	-0.246638	CTRL
PSMB10	-0.768195	CTRL
GEMIN6	-0.358427	CTRL
RNMT	-0.294121	CTRL
FAM193A	-0.221189	CTRL
AES	-0.38277	CTRL
TACC3	-1.47753	CTRL
WDR12	-0.461361	CTRL
SERPINH1	0.41516	CTRL
FNDC8	-0.701888	CTRL
CCDC97	-0.296805	CTRL
NLGN2	0.103218	CTRL
GATAD2A	0.00437479	CTRL
KMT2D	-0.108621	CTRL
DBNDD2	-0.696215	CTRL
STON2	6.19129	CTRL
AP4M1	-0.247249	CTRL
AANAT	-1.75273	CTRL
ADAR	-0.0196754	CTRL
PACSIN1	-0.270899	CTRL
RPUSD2	-0.272043	CTRL
RIMKLB	-1.04103	CTRL
MYL10	5.56242	CTRL
RIC1	0.0429144	CTRL
TNFAIP3	0.827383	CTRL
SUPT6H	-0.106183	CTRL
NDUFB7	-0.529533	CTRL
NPLOC4	-0.0585815	CTRL
CREBRF	0.186508	CTRL
CPAMD8	0.622046	CTRL
FAM83C	0.763055	CTRL
ING2	-0.664655	CTRL
H2AFX	-1.14099	CTRL
NR4A1	-0.807778	CTRL
PDXDC1	0.124943	CTRL
MRM1	-0.918158	CTRL
DCTPP1	-0.584172	CTRL
IER5L	-0.133395	CTRL
GLRB	-0.365654	CTRL
2020-03-05	0.256731	CTRL
PCDH1	2.07973	CTRL
HIST1H3J	0.852802	CTRL
RAD21L1	-0.8561	CTRL
MTFP1	-0.781577	CTRL
TMC7	1.10007	CTRL
CPEB4	0.0964334	CTRL
SYNM	-0.837203	CTRL
PDE12	-0.0342411	CTRL
RHOT1	-0.366272	CTRL
UNC79	-0.351919	CTRL
SLF2	-0.368401	CTRL
ZNF33A	-0.22222	CTRL
FBXL7	0.0761379	CTRL
ILF2	0.17339	CTRL
NDC80	-1.41667	CTRL
SUV39H1	-0.590378	CTRL
RHBDD1	-0.197176	CTRL
ARL4C	-0.688932	CTRL
SMG7	-0.0434757	CTRL
SFXN2	-0.0438859	CTRL
KIAA0907	-0.260974	CTRL
HSPA1B	0.0172405	CTRL
ZNF398	-0.121347	CTRL
EIF5B	-0.142058	CTRL
KDM6A	-0.253726	CTRL
WEE1	0.144635	CTRL
TTC9C	-0.308036	CTRL
POLR2F	-0.21806	CTRL
PPP2R2A	-0.0592514	CTRL
PHF21A	-0.475856	CTRL
SERINC2	3.41024	CTRL
MCM10	-1.16212	CTRL
C11orf95	0.101395	CTRL
OGDH	-0.12713	CTRL
SQSTM1	0.674403	CTRL
UBA5	-0.106556	CTRL
RAPGEF2	-0.619683	CTRL
PML	0.432608	CTRL
FBXL15	-0.343412	CTRL
INO80B	-0.351623	CTRL
2020-09-12	-1.42151	CTRL
COMTD1	-0.330078	CTRL
ACY1	-0.298857	CTRL
ANKRD34A	-1.3158	CTRL
NDUFS8	-0.506682	CTRL
BYSL	-0.287347	CTRL
TAX1BP1	0.105019	CTRL
ZNF181	-0.741073	CTRL
PHAX	0.1581	CTRL
GPR3	-0.644501	CTRL
IMP3	-0.380126	CTRL
MRPS5	-0.676945	CTRL
GAMT	-0.342833	CTRL
PROC	1.41582	CTRL
SLC25A36	-0.143434	CTRL
NUDT13	-1.28322	CTRL
CBX4	-0.483727	CTRL
AC008522.1	-0.918668	CTRL
GID4	-0.167926	CTRL
C1orf27	0.108253	CTRL
CLDND2	-0.744984	CTRL
KIF23	-1.2606	CTRL
C12orf73	-1.16516	CTRL
IFT88	-0.66372	CTRL
DDX46	-0.0497711	CTRL
PACRGL	-0.455974	CTRL
CREB3L1	4.2833	CTRL
ULBP3	0.936221	CTRL
SRR	0.000193531	CTRL
EMP3	-0.140656	CTRL
TOPBP1	-0.19235	CTRL
EFNA4	0.229169	CTRL
MSH2	-0.214754	CTRL
FAM102A	1.27537	CTRL
FAM155A	-0.239925	CTRL
IFNGR1	0.35662	CTRL
SMIM13	-0.549867	CTRL
DGKG	8.20009	CTRL
PSMD2	0.207605	CTRL
TUBB6	-0.102573	CTRL
ABI2	-0.646816	CTRL
ST6GALNAC4	1.57417	CTRL
EML6	0.080477	CTRL
COPS6	-0.0919185	CTRL
IGFBP4	5.51667	CTRL
RUNDC3B	0.368277	CTRL
EIF5	0.132603	CTRL
C12orf65	-0.242321	CTRL
IFT74	-0.076364	CTRL
RPS6KB1	-0.50229	CTRL
ZNF543	0.0419371	CTRL
NDUFV3	-0.279099	CTRL
C5orf24	0.0946606	CTRL
PSME2	0.357644	CTRL
SARS	-0.099391	CTRL
TRMT112	-0.392255	CTRL
C2CD2L	-0.935784	CTRL
TRIB3	-0.575636	CTRL
NME2	-0.39502	CTRL
HIST1H2BK	-0.0904891	CTRL
TMEM126B	0.246363	CTRL
DHX34	-0.377134	CTRL
PCOLCE	-0.931	CTRL
HOXC4	-0.6802	CTRL
C11orf86	7.50011	CTRL
ZNF561	-0.0741497	CTRL
ZMYND11	-0.378592	CTRL
ZNF555	0.232002	CTRL
NCLN	0.0522822	CTRL
BRPF1	-0.0594479	CTRL
AHDC1	0.942383	CTRL
PELO	0.142396	CTRL
ST3GAL3	0.10607	CTRL
SLC35A1	-0.486806	CTRL
PHACTR4	-0.15053	CTRL
PSMB4	-0.494763	CTRL
PCMT1	0.331185	CTRL
CFAP54	0.705162	CTRL
BUD31	-0.522088	CTRL
SLC35B1	-0.280486	CTRL
RAB35	0.0886307	CTRL
CASP7	0.610551	CTRL
HMGB1	-0.323503	CTRL
SP4	-0.633573	CTRL
AIP	-0.711542	CTRL
PRKD1	-0.705722	CTRL
CCDC63	-2.48109	CTRL
LARP4	-0.181845	CTRL
HDAC6	-0.531946	CTRL
UBXN4	-0.141271	CTRL
RABGAP1	-0.10709	CTRL
CALM3	-0.0639924	CTRL
ACOX1	-0.196262	CTRL
FAM83A	4.2348	CTRL
ACACB	-1.02829	CTRL
DNTTIP1	0.0311443	CTRL
RRAGA	-1.19583	CTRL
INTS10	-0.628643	CTRL
ALKBH7	-0.446144	CTRL
FAM177A1	-0.551412	CTRL
DMTF1	-0.533666	CTRL
ACIN1	-0.224879	CTRL
TRAF4	-0.245739	CTRL
CUTA	-0.517593	CTRL
USP10	-0.15555	CTRL
KCNK4	-1.46045	CTRL
CDC7	-0.589107	CTRL
DENND2C	0.0585766	CTRL
SERPINI1	0.0526241	CTRL
CD276	0.892869	CTRL
ILKAP	-0.454234	CTRL
ZNF683	5.25839	CTRL
CD151	0.855579	CTRL
UBXN11	0.212735	CTRL
NUFIP2	0.120189	CTRL
TBP	-0.195344	CTRL
SSBP4	-0.628469	CTRL
ZC2HC1C	-0.864507	CTRL
SETD1B	-0.286211	CTRL
CHST11	0.859573	CTRL
VPS26A	0.151946	CTRL
PHKG2	-0.203554	CTRL
NFATC2	0.151967	CTRL
ZNF587	-0.164034	CTRL
IL17C	-0.266618	CTRL
HADHB	0.103379	CTRL
DISC1	1.4896	CTRL
PIH1D1	-0.316424	CTRL
ZNF672	-0.669215	CTRL
BMP2K	0.402659	CTRL
DLX4	1.38972	CTRL
ARSK	0.250067	CTRL
SMU1	0.103713	CTRL
LINC01556	1.49445	CTRL
GANC	-0.0323844	CTRL
SPATA4	-0.324877	CTRL
USP13	-0.345807	CTRL
TIRAP	-0.47874	CTRL
PITPNC1	0.291501	CTRL
SRCAP	-0.135205	CTRL
ZMIZ1	0.739512	CTRL
BAG4	0.0558613	CTRL
DVL2	-0.0524328	CTRL
MOCS3	-0.0143973	CTRL
EMSY	0.0122294	CTRL
SRFBP1	0.110457	CTRL
WDR83OS	-0.42513	CTRL
M1AP	-0.743823	CTRL
POLD1	-1.01567	CTRL
CNBP	0.328576	CTRL
SDCBP	0.472865	CTRL
DALRD3	-0.313941	CTRL
ABCA4	5.14796	CTRL
THBS3	0.303239	CTRL
CCT2	-0.498072	CTRL
TUBB4B	-0.181023	CTRL
OCEL1	-0.492802	CTRL
RBM4	-0.306498	CTRL
YEATS4	-0.593081	CTRL
THRA	0.275537	CTRL
CAMKMT	-0.172004	CTRL
CABLES1	2.00754	CTRL
AC037459.4	-1.7198	CTRL
RBM15B	-0.106968	CTRL
CDC6	-0.226754	CTRL
P3H4	0.166868	CTRL
SKIL	0.373063	CTRL
NOX3	1.14312	CTRL
PLPP2	-0.786498	CTRL
TRA2B	-0.296634	CTRL
NAT14	-0.630176	CTRL
DCUN1D2	-0.214744	CTRL
NOXA1	-0.157615	CTRL
B4GALT7	0.409415	CTRL
SCUBE1	3.2352	CTRL
GINS1	-0.981004	CTRL
MAP1LC3B	-0.307727	CTRL
DOCK4	1.86268	CTRL
TARBP1	-1.24104	CTRL
KDM4A	-0.0878165	CTRL
REL	-0.210335	CTRL
APLP1	-1.54443	CTRL
RSPRY1	0.100939	CTRL
GCHFR	-0.890179	CTRL
ABHD18	-0.289718	CTRL
EPHA7	-0.924405	CTRL
RAB5A	0.313052	CTRL
ZNF749	0.100786	CTRL
STARD10	0.871397	CTRL
PHOSPHO2	-0.0535664	CTRL
TMUB1	-0.711417	CTRL
ZNF487	-0.795628	CTRL
CFL2	0.211272	CTRL
JRKL	-0.425606	CTRL
EIF4EBP2	0.0217567	CTRL
INSIG2	0.966185	CTRL
RAB25	-0.178058	CTRL
PDF	-0.378393	CTRL
TEAD4	-0.671707	CTRL
TTK	-1.29224	CTRL
FAM35A	-0.0855036	CTRL
CRIP1	-1.24203	CTRL
SEC61B	-0.194102	CTRL
CTDNEP1	-0.367587	CTRL
FSD1L	-0.169118	CTRL
FKBP1A	-0.246598	CTRL
KDM1B	0.0716716	CTRL
SNAI3	-0.475443	CTRL
HSP90AA1	0.0420123	CTRL
METTL13	-1.00854	CTRL
ELP2	0.120042	CTRL
NFIX	0.346946	CTRL
ANXA1	0.808082	CTRL
SLC26A8	2.1075	CTRL
ZNF483	-0.239512	CTRL
RGL1	2.70873	CTRL
EEF1E1	-0.0239356	CTRL
FURIN	0.821048	CTRL
ZNF385C	0.609663	CTRL
FDPS	-0.268103	CTRL
TMC4	-0.68142	CTRL
YIPF4	0.0308093	CTRL
MTTP	-0.908036	CTRL
RBBP6	-0.366153	CTRL
FAM216A	-0.104944	CTRL
ZNF527	-0.381831	CTRL
MPDZ	0.736128	CTRL
TDRD9	-0.184626	CTRL
GAN	-0.511647	CTRL
RPL19	-0.2375	CTRL
CENPP	-0.300517	CTRL
RASL11A	0.618365	CTRL
MEIG1	-0.484335	CTRL
ACTN4	1.26412	CTRL
HOXB2	-0.610538	CTRL
CAMK2N2	-1.23598	CTRL
C16orf62	0.0922486	CTRL
SLC2A8	0.699152	CTRL
PRUNE2	-0.500533	CTRL
FAM120C	-0.476479	CTRL
DUS3L	-0.308058	CTRL
HYKK	-0.495164	CTRL
TTC25	-0.539034	CTRL
LSMEM1	-0.807495	CTRL
TNPO2	-0.207182	CTRL
PIF1	-2.02739	CTRL
2020-03-06	-0.15173	CTRL
RELT	-0.248083	CTRL
ADAM9	0.18414	CTRL
RIC8A	0.221776	CTRL
SIKE1	-0.41805	CTRL
RAB2B	-0.229289	CTRL
NME4	-0.812145	CTRL
UFL1	-0.0833177	CTRL
AIMP1	0.216725	CTRL
GNB2	-0.429382	CTRL
HNRNPDL	-0.0117661	CTRL
CXorf58	-1.00679	CTRL
PNP	0.413923	CTRL
EWSR1	-0.299153	CTRL
C17orf53	-0.317368	CTRL
XRCC6	-0.107987	CTRL
ZBTB24	-0.309292	CTRL
ZNF230	-0.34743	CTRL
NDST1	0.750471	CTRL
TMEM183A	-0.16125	CTRL
CCP110	-0.112745	CTRL
CHCHD1	-0.105594	CTRL
BBS12	0.320696	CTRL
PDE4C	-1.18346	CTRL
UBE2C	-1.77829	CTRL
[truncated: 13,953 more rows]
