# Supplementary material for: Re-expression of SMARCA4/BRG1 in small cell carcinoma of ovary, hypercalcemic type (SCCOHT) promotes an epithelial-like gene signature through an AP-1-dependent mechanism
Source: eLife. 2020 Dec 23;9:e59073. doi: 10.7554/eLife.59073 (PMC7813545; doi:10.7554/eLife.59073)
Supplement: Figure 4—source data 1. [file elife-59073-fig4-data1.xlsx]

## Sheet: Panel_E
Position	group	assay	line	u	sd	cell_line
1	BRG1	Brg1	BIN67	1.15794	0.321288	BIN67
1	BRG1	Jun	BIN67	1.04977	0.131646	BIN67
1	CTRL	Brg1	BIN67	1.02776	0.238926	BIN67
1	CTRL	Jun	BIN67	1.03563	0.245993	BIN67
2	BRG1	Brg1	BIN67	1.16185	0.3249	BIN67
2	BRG1	Jun	BIN67	1.05135	0.133389	BIN67
2	CTRL	Brg1	BIN67	1.02759	0.238735	BIN67
2	CTRL	Jun	BIN67	1.03545	0.245221	BIN67
3	BRG1	Brg1	BIN67	1.16617	0.327109	BIN67
3	BRG1	Jun	BIN67	1.05335	0.135246	BIN67
3	CTRL	Brg1	BIN67	1.02679	0.224295	BIN67
3	CTRL	Jun	BIN67	1.0349	0.229486	BIN67
4	BRG1	Brg1	BIN67	1.17067	0.330279	BIN67
4	BRG1	Jun	BIN67	1.05535	0.13714	BIN67
4	CTRL	Brg1	BIN67	1.0266	0.223289	BIN67
4	CTRL	Jun	BIN67	1.0348	0.228886	BIN67
5	BRG1	Brg1	BIN67	1.17504	0.333499	BIN67
5	BRG1	Jun	BIN67	1.05736	0.138828	BIN67
5	CTRL	Brg1	BIN67	1.02638	0.22438	BIN67
5	CTRL	Jun	BIN67	1.0346	0.229797	BIN67
6	BRG1	Brg1	BIN67	1.18031	0.336683	BIN67
6	BRG1	Jun	BIN67	1.05965	0.140823	BIN67
6	CTRL	Brg1	BIN67	1.02595	0.221111	BIN67
6	CTRL	Jun	BIN67	1.0344	0.225401	BIN67
7	BRG1	Brg1	BIN67	1.18572	0.341258	BIN67
7	BRG1	Jun	BIN67	1.06211	0.144429	BIN67
7	CTRL	Brg1	BIN67	1.02558	0.221015	BIN67
7	CTRL	Jun	BIN67	1.03415	0.225658	BIN67
8	BRG1	Brg1	BIN67	1.19047	0.344894	BIN67
8	BRG1	Jun	BIN67	1.06457	0.147048	BIN67
8	CTRL	Brg1	BIN67	1.02558	0.22316	BIN67
8	CTRL	Jun	BIN67	1.03411	0.228037	BIN67
9	BRG1	Brg1	BIN67	1.19639	0.349957	BIN67
9	BRG1	Jun	BIN67	1.06714	0.149506	BIN67
9	CTRL	Brg1	BIN67	1.02566	0.224889	BIN67
9	CTRL	Jun	BIN67	1.03434	0.230039	BIN67
10	BRG1	Brg1	BIN67	1.20293	0.355129	BIN67
10	BRG1	Jun	BIN67	1.07001	0.153817	BIN67
10	CTRL	Brg1	BIN67	1.02557	0.22736	BIN67
10	CTRL	Jun	BIN67	1.03449	0.232876	BIN67
11	BRG1	Brg1	BIN67	1.20851	0.359326	BIN67
11	BRG1	Jun	BIN67	1.07287	0.157159	BIN67
11	CTRL	Brg1	BIN67	1.02557	0.23004	BIN67
11	CTRL	Jun	BIN67	1.03451	0.235484	BIN67
12	BRG1	Brg1	BIN67	1.21512	0.365362	BIN67
12	BRG1	Jun	BIN67	1.07587	0.160555	BIN67
12	CTRL	Brg1	BIN67	1.02579	0.233567	BIN67
12	CTRL	Jun	BIN67	1.03481	0.239325	BIN67
13	BRG1	Brg1	BIN67	1.22227	0.370694	BIN67
13	BRG1	Jun	BIN67	1.0792	0.164357	BIN67
13	CTRL	Brg1	BIN67	1.02581	0.239606	BIN67
13	CTRL	Jun	BIN67	1.03517	0.245805	BIN67
14	BRG1	Brg1	BIN67	1.22845	0.374483	BIN67
14	BRG1	Jun	BIN67	1.0824	0.167197	BIN67
14	CTRL	Brg1	BIN67	1.02571	0.242097	BIN67
14	CTRL	Jun	BIN67	1.0352	0.246955	BIN67
15	BRG1	Brg1	BIN67	1.23589	0.380284	BIN67
15	BRG1	Jun	BIN67	1.08601	0.170563	BIN67
15	CTRL	Brg1	BIN67	1.02574	0.244771	BIN67
15	CTRL	Jun	BIN67	1.03528	0.249822	BIN67
16	BRG1	Brg1	BIN67	1.24331	0.386125	BIN67
16	BRG1	Jun	BIN67	1.08972	0.174343	BIN67
16	CTRL	Brg1	BIN67	1.02576	0.249646	BIN67
16	CTRL	Jun	BIN67	1.03572	0.255848	BIN67
17	BRG1	Brg1	BIN67	1.25032	0.390869	BIN67
17	BRG1	Jun	BIN67	1.09334	0.176982	BIN67
17	CTRL	Brg1	BIN67	1.02591	0.251141	BIN67
17	CTRL	Jun	BIN67	1.03605	0.25661	BIN67
18	BRG1	Brg1	BIN67	1.25867	0.396191	BIN67
18	BRG1	Jun	BIN67	1.09758	0.180901	BIN67
18	CTRL	Brg1	BIN67	1.0259	0.248415	BIN67
18	CTRL	Jun	BIN67	1.03593	0.252838	BIN67
19	BRG1	Brg1	BIN67	1.26717	0.402876	BIN67
19	BRG1	Jun	BIN67	1.10185	0.184773	BIN67
19	CTRL	Brg1	BIN67	1.02561	0.24438	BIN67
19	CTRL	Jun	BIN67	1.03602	0.249031	BIN67
20	BRG1	Brg1	BIN67	1.2754	0.408593	BIN67
20	BRG1	Jun	BIN67	1.10596	0.188035	BIN67
20	CTRL	Brg1	BIN67	1.02566	0.239902	BIN67
20	CTRL	Jun	BIN67	1.03628	0.246364	BIN67
21	BRG1	Brg1	BIN67	1.28445	0.413296	BIN67
21	BRG1	Jun	BIN67	1.11059	0.192322	BIN67
21	CTRL	Brg1	BIN67	1.02596	0.242497	BIN67
21	CTRL	Jun	BIN67	1.03656	0.248201	BIN67
22	BRG1	Brg1	BIN67	1.29367	0.419719	BIN67
22	BRG1	Jun	BIN67	1.11557	0.196492	BIN67
22	CTRL	Brg1	BIN67	1.02591	0.244365	BIN67
22	CTRL	Jun	BIN67	1.03686	0.250226	BIN67
23	BRG1	Brg1	BIN67	1.30296	0.424846	BIN67
23	BRG1	Jun	BIN67	1.12026	0.200503	BIN67
23	CTRL	Brg1	BIN67	1.02591	0.246677	BIN67
23	CTRL	Jun	BIN67	1.03726	0.253825	BIN67
24	BRG1	Brg1	BIN67	1.31256	0.429373	BIN67
24	BRG1	Jun	BIN67	1.12549	0.205149	BIN67
24	CTRL	Brg1	BIN67	1.02636	0.25241	BIN67
24	CTRL	Jun	BIN67	1.03798	0.259698	BIN67
25	BRG1	Brg1	BIN67	1.32223	0.433186	BIN67
25	BRG1	Jun	BIN67	1.1312	0.210261	BIN67
25	CTRL	Brg1	BIN67	1.02641	0.255589	BIN67
25	CTRL	Jun	BIN67	1.03842	0.26299	BIN67
26	BRG1	Brg1	BIN67	1.33273	0.436488	BIN67
26	BRG1	Jun	BIN67	1.1369	0.214985	BIN67
26	CTRL	Brg1	BIN67	1.02657	0.260128	BIN67
26	CTRL	Jun	BIN67	1.03903	0.268843	BIN67
27	BRG1	Brg1	BIN67	1.34407	0.440922	BIN67
27	BRG1	Jun	BIN67	1.14327	0.220206	BIN67
27	CTRL	Brg1	BIN67	1.02663	0.263268	BIN67
27	CTRL	Jun	BIN67	1.03939	0.272479	BIN67
28	BRG1	Brg1	BIN67	1.35621	0.444239	BIN67
28	BRG1	Jun	BIN67	1.15009	0.225974	BIN67
28	CTRL	Brg1	BIN67	1.02654	0.266094	BIN67
28	CTRL	Jun	BIN67	1.03968	0.275562	BIN67
29	BRG1	Brg1	BIN67	1.36897	0.447263	BIN67
29	BRG1	Jun	BIN67	1.15708	0.231531	BIN67
29	CTRL	Brg1	BIN67	1.02668	0.27106	BIN67
29	CTRL	Jun	BIN67	1.04018	0.281522	BIN67
30	BRG1	Brg1	BIN67	1.38323	0.451655	BIN67
30	BRG1	Jun	BIN67	1.16475	0.237132	BIN67
30	CTRL	Brg1	BIN67	1.02688	0.277014	BIN67
30	CTRL	Jun	BIN67	1.04064	0.287133	BIN67
31	BRG1	Brg1	BIN67	1.39875	0.455643	BIN67
31	BRG1	Jun	BIN67	1.17306	0.24303	BIN67
31	CTRL	Brg1	BIN67	1.02664	0.279225	BIN67
31	CTRL	Jun	BIN67	1.04092	0.290277	BIN67
32	BRG1	Brg1	BIN67	1.41572	0.461837	BIN67
32	BRG1	Jun	BIN67	1.18141	0.249284	BIN67
32	CTRL	Brg1	BIN67	1.02642	0.280635	BIN67
32	CTRL	Jun	BIN67	1.04114	0.291837	BIN67
33	BRG1	Brg1	BIN67	1.43463	0.467463	BIN67
33	BRG1	Jun	BIN67	1.19044	0.255941	BIN67
33	CTRL	Brg1	BIN67	1.02679	0.287378	BIN67
33	CTRL	Jun	BIN67	1.04187	0.298677	BIN67
34	BRG1	Brg1	BIN67	1.45423	0.473032	BIN67
34	BRG1	Jun	BIN67	1.20001	0.262918	BIN67
34	CTRL	Brg1	BIN67	1.02681	0.290137	BIN67
34	CTRL	Jun	BIN67	1.04236	0.302553	BIN67
35	BRG1	Brg1	BIN67	1.47595	0.482441	BIN67
35	BRG1	Jun	BIN67	1.20935	0.269455	BIN67
35	CTRL	Brg1	BIN67	1.02646	0.291365	BIN67
35	CTRL	Jun	BIN67	1.04249	0.303933	BIN67
36	BRG1	Brg1	BIN67	1.5001	0.49145	BIN67
36	BRG1	Jun	BIN67	1.21936	0.276487	BIN67
36	CTRL	Brg1	BIN67	1.02617	0.294746	BIN67
36	CTRL	Jun	BIN67	1.04259	0.306702	BIN67
37	BRG1	Brg1	BIN67	1.52457	0.500748	BIN67
37	BRG1	Jun	BIN67	1.22953	0.283595	BIN67
37	CTRL	Brg1	BIN67	1.02625	0.299017	BIN67
37	CTRL	Jun	BIN67	1.04292	0.311573	BIN67
38	BRG1	Brg1	BIN67	1.55098	0.51354	BIN67
38	BRG1	Jun	BIN67	1.23951	0.290058	BIN67
38	CTRL	Brg1	BIN67	1.02608	0.302321	BIN67
38	CTRL	Jun	BIN67	1.04306	0.314689	BIN67
39	BRG1	Brg1	BIN67	1.58046	0.527651	BIN67
39	BRG1	Jun	BIN67	1.24993	0.297116	BIN67
39	CTRL	Brg1	BIN67	1.02549	0.305451	BIN67
39	CTRL	Jun	BIN67	1.04293	0.316194	BIN67
40	BRG1	Brg1	BIN67	1.6104	0.540566	BIN67
40	BRG1	Jun	BIN67	1.2597	0.302667	BIN67
40	CTRL	Brg1	BIN67	1.02539	0.308269	BIN67
40	CTRL	Jun	BIN67	1.04306	0.319433	BIN67
41	BRG1	Brg1	BIN67	1.64151	0.554996	BIN67
41	BRG1	Jun	BIN67	1.26988	0.309425	BIN67
41	CTRL	Brg1	BIN67	1.025	0.309382	BIN67
41	CTRL	Jun	BIN67	1.04294	0.320672	BIN67
42	BRG1	Brg1	BIN67	1.67536	0.570887	BIN67
42	BRG1	Jun	BIN67	1.27964	0.315855	BIN67
42	CTRL	Brg1	BIN67	1.02471	0.311863	BIN67
42	CTRL	Jun	BIN67	1.04309	0.322938	BIN67
43	BRG1	Brg1	BIN67	1.71004	0.585898	BIN67
43	BRG1	Jun	BIN67	1.28853	0.320377	BIN67
43	CTRL	Brg1	BIN67	1.02455	0.312227	BIN67
43	CTRL	Jun	BIN67	1.04313	0.323877	BIN67
44	BRG1	Brg1	BIN67	1.74628	0.601783	BIN67
44	BRG1	Jun	BIN67	1.29769	0.326175	BIN67
44	CTRL	Brg1	BIN67	1.02429	0.311908	BIN67
44	CTRL	Jun	BIN67	1.04312	0.324592	BIN67
45	BRG1	Brg1	BIN67	1.78539	0.619529	BIN67
45	BRG1	Jun	BIN67	1.30616	0.331491	BIN67
45	CTRL	Brg1	BIN67	1.02425	0.309343	BIN67
45	CTRL	Jun	BIN67	1.04334	0.324539	BIN67
46	BRG1	Brg1	BIN67	1.82466	0.637838	BIN67
46	BRG1	Jun	BIN67	1.31389	0.336393	BIN67
46	CTRL	Brg1	BIN67	1.02453	0.31162	BIN67
46	CTRL	Jun	BIN67	1.04378	0.326955	BIN67
47	BRG1	Brg1	BIN67	1.86158	0.655256	BIN67
47	BRG1	Jun	BIN67	1.32053	0.34086	BIN67
47	CTRL	Brg1	BIN67	1.02494	0.315222	BIN67
47	CTRL	Jun	BIN67	1.04447	0.330951	BIN67
48	BRG1	Brg1	BIN67	1.89716	0.672536	BIN67
48	BRG1	Jun	BIN67	1.32576	0.34433	BIN67
48	CTRL	Brg1	BIN67	1.02552	0.319289	BIN67
48	CTRL	Jun	BIN67	1.04523	0.335023	BIN67
49	BRG1	Brg1	BIN67	1.92755	0.687841	BIN67
49	BRG1	Jun	BIN67	1.32999	0.347496	BIN67
49	CTRL	Brg1	BIN67	1.02614	0.323564	BIN67
49	CTRL	Jun	BIN67	1.0461	0.339841	BIN67
50	BRG1	Brg1	BIN67	1.94923	0.698742	BIN67
50	BRG1	Jun	BIN67	1.33279	0.349697	BIN67
50	CTRL	Brg1	BIN67	1.02663	0.327735	BIN67
50	CTRL	Jun	BIN67	1.04675	0.344399	BIN67
51	BRG1	Brg1	BIN67	1.9638	0.706027	BIN67
51	BRG1	Jun	BIN67	1.3341	0.350424	BIN67
51	CTRL	Brg1	BIN67	1.02703	0.33219	BIN67
51	CTRL	Jun	BIN67	1.04712	0.346952	BIN67
52	BRG1	Brg1	BIN67	1.96967	0.708388	BIN67
52	BRG1	Jun	BIN67	1.33513	0.351315	BIN67
52	CTRL	Brg1	BIN67	1.02701	0.333568	BIN67
52	CTRL	Jun	BIN67	1.04723	0.348412	BIN67
53	BRG1	Brg1	BIN67	1.96662	0.706662	BIN67
53	BRG1	Jun	BIN67	1.33513	0.351704	BIN67
53	CTRL	Brg1	BIN67	1.02727	0.338083	BIN67
53	CTRL	Jun	BIN67	1.04735	0.353131	BIN67
54	BRG1	Brg1	BIN67	1.95612	0.702157	BIN67
54	BRG1	Jun	BIN67	1.33413	0.351122	BIN67
54	CTRL	Brg1	BIN67	1.02729	0.337734	BIN67
54	CTRL	Jun	BIN67	1.04696	0.351865	BIN67
55	BRG1	Brg1	BIN67	1.94021	0.695494	BIN67
55	BRG1	Jun	BIN67	1.33298	0.350714	BIN67
55	CTRL	Brg1	BIN67	1.02688	0.335775	BIN67
55	CTRL	Jun	BIN67	1.04638	0.349151	BIN67
56	BRG1	Brg1	BIN67	1.91916	0.68524	BIN67
56	BRG1	Jun	BIN67	1.33005	0.348822	BIN67
56	CTRL	Brg1	BIN67	1.02685	0.338024	BIN67
56	CTRL	Jun	BIN67	1.04614	0.35165	BIN67
57	BRG1	Brg1	BIN67	1.8936	0.674322	BIN67
57	BRG1	Jun	BIN67	1.32618	0.346382	BIN67
57	CTRL	Brg1	BIN67	1.02637	0.329884	BIN67
57	CTRL	Jun	BIN67	1.04526	0.345084	BIN67
58	BRG1	Brg1	BIN67	1.8672	0.665162	BIN67
58	BRG1	Jun	BIN67	1.32159	0.343497	BIN67
58	CTRL	Brg1	BIN67	1.026	0.325159	BIN67
58	CTRL	Jun	BIN67	1.04456	0.339879	BIN67
59	BRG1	Brg1	BIN67	1.84015	0.653821	BIN67
59	BRG1	Jun	BIN67	1.31592	0.340123	BIN67
59	CTRL	Brg1	BIN67	1.02562	0.317317	BIN67
59	CTRL	Jun	BIN67	1.04399	0.33105	BIN67
60	BRG1	Brg1	BIN67	1.8106	0.641342	BIN67
60	BRG1	Jun	BIN67	1.30981	0.336517	BIN67
60	CTRL	Brg1	BIN67	1.02563	0.314834	BIN67
60	CTRL	Jun	BIN67	1.04375	0.328364	BIN67
61	BRG1	Brg1	BIN67	1.78215	0.632649	BIN67
61	BRG1	Jun	BIN67	1.30319	0.332573	BIN67
61	CTRL	Brg1	BIN67	1.0254	0.312497	BIN67
61	CTRL	Jun	BIN67	1.04325	0.325171	BIN67
62	BRG1	Brg1	BIN67	1.75479	0.621864	BIN67
62	BRG1	Jun	BIN67	1.29628	0.328202	BIN67
62	CTRL	Brg1	BIN67	1.02524	0.308851	BIN67
62	CTRL	Jun	BIN67	1.04284	0.320912	BIN67
63	BRG1	Brg1	BIN67	1.72578	0.608727	BIN67
63	BRG1	Jun	BIN67	1.28925	0.323849	BIN67
63	CTRL	Brg1	BIN67	1.02564	0.309668	BIN67
63	CTRL	Jun	BIN67	1.04295	0.321166	BIN67
64	BRG1	Brg1	BIN67	1.69723	0.597797	BIN67
64	BRG1	Jun	BIN67	1.28202	0.319822	BIN67
64	CTRL	Brg1	BIN67	1.02584	0.310309	BIN67
64	CTRL	Jun	BIN67	1.0429	0.320547	BIN67
65	BRG1	Brg1	BIN67	1.66942	0.586719	BIN67
65	BRG1	Jun	BIN67	1.2744	0.315574	BIN67
65	CTRL	Brg1	BIN67	1.02596	0.30895	BIN67
65	CTRL	Jun	BIN67	1.04283	0.319425	BIN67
66	BRG1	Brg1	BIN67	1.64112	0.573746	BIN67
66	BRG1	Jun	BIN67	1.26614	0.310886	BIN67
66	CTRL	Brg1	BIN67	1.02605	0.306719	BIN67
66	CTRL	Jun	BIN67	1.04263	0.317525	BIN67
67	BRG1	Brg1	BIN67	1.61313	0.560799	BIN67
67	BRG1	Jun	BIN67	1.25765	0.306055	BIN67
67	CTRL	Brg1	BIN67	1.02622	0.304067	BIN67
67	CTRL	Jun	BIN67	1.04243	0.314214	BIN67
68	BRG1	Brg1	BIN67	1.58557	0.549588	BIN67
68	BRG1	Jun	BIN67	1.2492	0.301009	BIN67
68	CTRL	Brg1	BIN67	1.02634	0.301285	BIN67
68	CTRL	Jun	BIN67	1.04227	0.311907	BIN67
69	BRG1	Brg1	BIN67	1.55769	0.536665	BIN67
69	BRG1	Jun	BIN67	1.23977	0.295008	BIN67
69	CTRL	Brg1	BIN67	1.0263	0.298976	BIN67
69	CTRL	Jun	BIN67	1.04192	0.310306	BIN67
70	BRG1	Brg1	BIN67	1.53107	0.524788	BIN67
70	BRG1	Jun	BIN67	1.23006	0.289289	BIN67
70	CTRL	Brg1	BIN67	1.0265	0.294924	BIN67
70	CTRL	Jun	BIN67	1.04164	0.306185	BIN67
71	BRG1	Brg1	BIN67	1.50641	0.516801	BIN67
71	BRG1	Jun	BIN67	1.22095	0.283937	BIN67
71	CTRL	Brg1	BIN67	1.02677	0.295331	BIN67
71	CTRL	Jun	BIN67	1.04152	0.306814	BIN67
72	BRG1	Brg1	BIN67	1.48171	0.507555	BIN67
72	BRG1	Jun	BIN67	1.21131	0.27803	BIN67
72	CTRL	Brg1	BIN67	1.02689	0.297225	BIN67
72	CTRL	Jun	BIN67	1.04138	0.310301	BIN67
73	BRG1	Brg1	BIN67	1.45917	0.497739	BIN67
73	BRG1	Jun	BIN67	1.20213	0.2724	BIN67
73	CTRL	Brg1	BIN67	1.02714	0.29443	BIN67
73	CTRL	Jun	BIN67	1.04129	0.308939	BIN67
74	BRG1	Brg1	BIN67	1.44059	0.492408	BIN67
74	BRG1	Jun	BIN67	1.19356	0.266746	BIN67
74	CTRL	Brg1	BIN67	1.02725	0.295728	BIN67
74	CTRL	Jun	BIN67	1.04102	0.310552	BIN67
75	BRG1	Brg1	BIN67	1.42171	0.487827	BIN67
75	BRG1	Jun	BIN67	1.18471	0.260988	BIN67
75	CTRL	Brg1	BIN67	1.02735	0.29758	BIN67
75	CTRL	Jun	BIN67	1.0409	0.314106	BIN67
76	BRG1	Brg1	BIN67	1.40501	0.480804	BIN67
76	BRG1	Jun	BIN67	1.17647	0.254962	BIN67
76	CTRL	Brg1	BIN67	1.02746	0.294145	BIN67
76	CTRL	Jun	BIN67	1.04078	0.31119	BIN67
77	BRG1	Brg1	BIN67	1.39173	0.47539	BIN67
77	BRG1	Jun	BIN67	1.169	0.249123	BIN67
77	CTRL	Brg1	BIN67	1.02741	0.286429	BIN67
77	CTRL	Jun	BIN67	1.04029	0.303371	BIN67
78	BRG1	Brg1	BIN67	1.37757	0.471003	BIN67
78	BRG1	Jun	BIN67	1.16143	0.243305	BIN67
78	CTRL	Brg1	BIN67	1.02737	0.281008	BIN67
78	CTRL	Jun	BIN67	1.03988	0.296967	BIN67
79	BRG1	Brg1	BIN67	1.36496	0.465618	BIN67
79	BRG1	Jun	BIN67	1.15404	0.237594	BIN67
79	CTRL	Brg1	BIN67	1.02714	0.276589	BIN67
79	CTRL	Jun	BIN67	1.03944	0.292273	BIN67
80	BRG1	Brg1	BIN67	1.35392	0.460581	BIN67
80	BRG1	Jun	BIN67	1.14769	0.232759	BIN67
80	CTRL	Brg1	BIN67	1.02706	0.271234	BIN67
80	CTRL	Jun	BIN67	1.03911	0.286167	BIN67
81	BRG1	Brg1	BIN67	1.34224	0.455917	BIN67
81	BRG1	Jun	BIN67	1.14164	0.228281	BIN67
81	CTRL	Brg1	BIN67	1.02687	0.265504	BIN67
81	CTRL	Jun	BIN67	1.03865	0.279868	BIN67
82	BRG1	Brg1	BIN67	1.33103	0.449716	BIN67
82	BRG1	Jun	BIN67	1.13537	0.223966	BIN67
82	CTRL	Brg1	BIN67	1.0268	0.262177	BIN67
82	CTRL	Jun	BIN67	1.03828	0.276322	BIN67
83	BRG1	Brg1	BIN67	1.32114	0.444238	BIN67
83	BRG1	Jun	BIN67	1.12986	0.219852	BIN67
83	CTRL	Brg1	BIN67	1.02685	0.260518	BIN67
83	CTRL	Jun	BIN67	1.03821	0.273913	BIN67
84	BRG1	Brg1	BIN67	1.31098	0.439701	BIN67
84	BRG1	Jun	BIN67	1.1246	0.215542	BIN67
84	CTRL	Brg1	BIN67	1.02648	0.25519	BIN67
84	CTRL	Jun	BIN67	1.03755	0.267872	BIN67
85	BRG1	Brg1	BIN67	1.30071	0.433799	BIN67
85	BRG1	Jun	BIN67	1.11923	0.211258	BIN67
85	CTRL	Brg1	BIN67	1.02664	0.252682	BIN67
85	CTRL	Jun	BIN67	1.03719	0.264527	BIN67
86	BRG1	Brg1	BIN67	1.2918	0.428928	BIN67
86	BRG1	Jun	BIN67	1.11451	0.207657	BIN67
86	CTRL	Brg1	BIN67	1.02684	0.253998	BIN67
86	CTRL	Jun	BIN67	1.0372	0.264849	BIN67
87	BRG1	Brg1	BIN67	1.28285	0.42448	BIN67
87	BRG1	Jun	BIN67	1.1097	0.20321	BIN67
87	CTRL	Brg1	BIN67	1.02657	0.250596	BIN67
87	CTRL	Jun	BIN67	1.03683	0.261429	BIN67
88	BRG1	Brg1	BIN67	1.27356	0.418449	BIN67
88	BRG1	Jun	BIN67	1.10491	0.198567	BIN67
88	CTRL	Brg1	BIN67	1.02658	0.249078	BIN67
88	CTRL	Jun	BIN67	1.03636	0.25907	BIN67
89	BRG1	Brg1	BIN67	1.26509	0.412075	BIN67
89	BRG1	Jun	BIN67	1.10098	0.19566	BIN67
89	CTRL	Brg1	BIN67	1.02666	0.251022	BIN67
89	CTRL	Jun	BIN67	1.03632	0.259995	BIN67
90	BRG1	Brg1	BIN67	1.25709	0.40718	BIN67
90	BRG1	Jun	BIN67	1.09685	0.191711	BIN67
90	CTRL	Brg1	BIN67	1.02627	0.247122	BIN67
90	CTRL	Jun	BIN67	1.03597	0.256908	BIN67
91	BRG1	Brg1	BIN67	1.24866	0.401386	BIN67
91	BRG1	Jun	BIN67	1.09261	0.187739	BIN67
91	CTRL	Brg1	BIN67	1.02637	0.246337	BIN67
91	CTRL	Jun	BIN67	1.03569	0.25578	BIN67
92	BRG1	Brg1	BIN67	1.24092	0.392829	BIN67
92	BRG1	Jun	BIN67	1.08911	0.184384	BIN67
92	CTRL	Brg1	BIN67	1.02661	0.24429	BIN67
92	CTRL	Jun	BIN67	1.03569	0.253504	BIN67
93	BRG1	Brg1	BIN67	1.23342	0.386336	BIN67
93	BRG1	Jun	BIN67	1.08543	0.180266	BIN67
93	CTRL	Brg1	BIN67	1.02641	0.241186	BIN67
93	CTRL	Jun	BIN67	1.03537	0.25083	BIN67
94	BRG1	Brg1	BIN67	1.22575	0.380825	BIN67
94	BRG1	Jun	BIN67	1.08182	0.176003	BIN67
94	CTRL	Brg1	BIN67	1.02627	0.240029	BIN67
94	CTRL	Jun	BIN67	1.03497	0.249303	BIN67
95	BRG1	Brg1	BIN67	1.21898	0.372588	BIN67
95	BRG1	Jun	BIN67	1.07862	0.171634	BIN67
95	CTRL	Brg1	BIN67	1.0266	0.238127	BIN67
95	CTRL	Jun	BIN67	1.03498	0.24768	BIN67
96	BRG1	Brg1	BIN67	1.21202	0.365398	BIN67
96	BRG1	Jun	BIN67	1.07526	0.167329	BIN67
96	CTRL	Brg1	BIN67	1.02694	0.237826	BIN67
96	CTRL	Jun	BIN67	1.03517	0.248276	BIN67
97	BRG1	Brg1	BIN67	1.2054	0.360748	BIN67
97	BRG1	Jun	BIN67	1.07208	0.163013	BIN67
97	CTRL	Brg1	BIN67	1.02684	0.235788	BIN67
97	CTRL	Jun	BIN67	1.03473	0.245731	BIN67
98	BRG1	Brg1	BIN67	1.19932	0.35475	BIN67
98	BRG1	Jun	BIN67	1.06918	0.158649	BIN67
98	CTRL	Brg1	BIN67	1.02694	0.234937	BIN67
98	CTRL	Jun	BIN67	1.03449	0.244424	BIN67
99	BRG1	Brg1	BIN67	1.19352	0.348705	BIN67
99	BRG1	Jun	BIN67	1.06626	0.155017	BIN67
99	CTRL	Brg1	BIN67	1.02698	0.232764	BIN67
99	CTRL	Jun	BIN67	1.03427	0.241655	BIN67
100	BRG1	Brg1	BIN67	1.18815	0.344672	BIN67
100	BRG1	Jun	BIN67	1.06337	0.151478	BIN67
100	CTRL	Brg1	BIN67	1.02699	0.230693	BIN67
100	CTRL	Jun	BIN67	1.03387	0.238877	BIN67
1	BRG1	Brg1	HT1	1.17123	0.2869	SCCOHT1
1	BRG1	Jun	HT1	1.12371	0.262172	SCCOHT1
1	CTRL	Brg1	HT1	1.0096	0.128967	SCCOHT1
1	CTRL	Jun	HT1	1.13659	0.485103	SCCOHT1
2	BRG1	Brg1	HT1	1.17467	0.28913	SCCOHT1
2	BRG1	Jun	HT1	1.12722	0.265587	SCCOHT1
2	CTRL	Brg1	HT1	1.00973	0.129053	SCCOHT1
2	CTRL	Jun	HT1	1.13863	0.490067	SCCOHT1
3	BRG1	Brg1	HT1	1.17838	0.291915	SCCOHT1
3	BRG1	Jun	HT1	1.13101	0.269735	SCCOHT1
3	CTRL	Brg1	HT1	1.00983	0.129201	SCCOHT1
3	CTRL	Jun	HT1	1.14066	0.494725	SCCOHT1
4	BRG1	Brg1	HT1	1.18235	0.294824	SCCOHT1
4	BRG1	Jun	HT1	1.13518	0.274092	SCCOHT1
4	CTRL	Brg1	HT1	1.00993	0.129249	SCCOHT1
4	CTRL	Jun	HT1	1.14281	0.498785	SCCOHT1
5	BRG1	Brg1	HT1	1.18657	0.297677	SCCOHT1
5	BRG1	Jun	HT1	1.13955	0.278719	SCCOHT1
5	CTRL	Brg1	HT1	1.01004	0.129378	SCCOHT1
5	CTRL	Jun	HT1	1.14515	0.505197	SCCOHT1
6	BRG1	Brg1	HT1	1.19084	0.300864	SCCOHT1
6	BRG1	Jun	HT1	1.14395	0.284288	SCCOHT1
6	CTRL	Brg1	HT1	1.00993	0.129525	SCCOHT1
6	CTRL	Jun	HT1	1.1473	0.510441	SCCOHT1
7	BRG1	Brg1	HT1	1.19515	0.304134	SCCOHT1
7	BRG1	Jun	HT1	1.14857	0.290133	SCCOHT1
7	CTRL	Brg1	HT1	1.00985	0.129447	SCCOHT1
7	CTRL	Jun	HT1	1.14972	0.516651	SCCOHT1
8	BRG1	Brg1	HT1	1.19982	0.307707	SCCOHT1
8	BRG1	Jun	HT1	1.1535	0.295918	SCCOHT1
8	CTRL	Brg1	HT1	1.00977	0.129437	SCCOHT1
8	CTRL	Jun	HT1	1.15226	0.52409	SCCOHT1
9	BRG1	Brg1	HT1	1.20445	0.311295	SCCOHT1
9	BRG1	Jun	HT1	1.15847	0.302461	SCCOHT1
9	CTRL	Brg1	HT1	1.00963	0.129688	SCCOHT1
9	CTRL	Jun	HT1	1.15464	0.528662	SCCOHT1
10	BRG1	Brg1	HT1	1.20926	0.315123	SCCOHT1
10	BRG1	Jun	HT1	1.16378	0.309829	SCCOHT1
10	CTRL	Brg1	HT1	1.00958	0.129659	SCCOHT1
10	CTRL	Jun	HT1	1.15739	0.535541	SCCOHT1
11	BRG1	Brg1	HT1	1.21429	0.318739	SCCOHT1
11	BRG1	Jun	HT1	1.16927	0.316557	SCCOHT1
11	CTRL	Brg1	HT1	1.00946	0.129556	SCCOHT1
11	CTRL	Jun	HT1	1.16025	0.542821	SCCOHT1
12	BRG1	Brg1	HT1	1.21968	0.322895	SCCOHT1
12	BRG1	Jun	HT1	1.17488	0.32315	SCCOHT1
12	CTRL	Brg1	HT1	1.00946	0.1301	SCCOHT1
12	CTRL	Jun	HT1	1.1632	0.547654	SCCOHT1
13	BRG1	Brg1	HT1	1.22527	0.327023	SCCOHT1
13	BRG1	Jun	HT1	1.18079	0.330479	SCCOHT1
13	CTRL	Brg1	HT1	1.00951	0.130338	SCCOHT1
13	CTRL	Jun	HT1	1.16645	0.554756	SCCOHT1
14	BRG1	Brg1	HT1	1.23076	0.330612	SCCOHT1
14	BRG1	Jun	HT1	1.18683	0.33761	SCCOHT1
14	CTRL	Brg1	HT1	1.0096	0.130504	SCCOHT1
14	CTRL	Jun	HT1	1.16977	0.562124	SCCOHT1
15	BRG1	Brg1	HT1	1.23666	0.334606	SCCOHT1
15	BRG1	Jun	HT1	1.19269	0.344054	SCCOHT1
15	CTRL	Brg1	HT1	1.00967	0.130747	SCCOHT1
15	CTRL	Jun	HT1	1.17309	0.567389	SCCOHT1
16	BRG1	Brg1	HT1	1.24275	0.338453	SCCOHT1
16	BRG1	Jun	HT1	1.19858	0.350466	SCCOHT1
16	CTRL	Brg1	HT1	1.00967	0.130845	SCCOHT1
16	CTRL	Jun	HT1	1.17682	0.574833	SCCOHT1
17	BRG1	Brg1	HT1	1.24837	0.341363	SCCOHT1
17	BRG1	Jun	HT1	1.20445	0.356403	SCCOHT1
17	CTRL	Brg1	HT1	1.00992	0.131319	SCCOHT1
17	CTRL	Jun	HT1	1.18048	0.58272	SCCOHT1
18	BRG1	Brg1	HT1	1.254	0.34413	SCCOHT1
18	BRG1	Jun	HT1	1.2101	0.36198	SCCOHT1
18	CTRL	Brg1	HT1	1.01004	0.131705	SCCOHT1
18	CTRL	Jun	HT1	1.18404	0.588442	SCCOHT1
19	BRG1	Brg1	HT1	1.2599	0.347072	SCCOHT1
19	BRG1	Jun	HT1	1.21574	0.367541	SCCOHT1
19	CTRL	Brg1	HT1	1.01002	0.131715	SCCOHT1
19	CTRL	Jun	HT1	1.18797	0.596471	SCCOHT1
20	BRG1	Brg1	HT1	1.2653	0.348861	SCCOHT1
20	BRG1	Jun	HT1	1.22072	0.371579	SCCOHT1
20	CTRL	Brg1	HT1	1.01018	0.13206	SCCOHT1
20	CTRL	Jun	HT1	1.1915	0.603417	SCCOHT1
21	BRG1	Brg1	HT1	1.27043	0.350143	SCCOHT1
21	BRG1	Jun	HT1	1.22547	0.374671	SCCOHT1
21	CTRL	Brg1	HT1	1.01035	0.132606	SCCOHT1
21	CTRL	Jun	HT1	1.19495	0.607279	SCCOHT1
22	BRG1	Brg1	HT1	1.27551	0.351337	SCCOHT1
22	BRG1	Jun	HT1	1.22987	0.377758	SCCOHT1
22	CTRL	Brg1	HT1	1.0104	0.132793	SCCOHT1
22	CTRL	Jun	HT1	1.19825	0.612544	SCCOHT1
23	BRG1	Brg1	HT1	1.28038	0.351697	SCCOHT1
23	BRG1	Jun	HT1	1.23379	0.379398	SCCOHT1
23	CTRL	Brg1	HT1	1.01053	0.132962	SCCOHT1
23	CTRL	Jun	HT1	1.20112	0.616166	SCCOHT1
24	BRG1	Brg1	HT1	1.28503	0.351204	SCCOHT1
24	BRG1	Jun	HT1	1.23715	0.378804	SCCOHT1
24	CTRL	Brg1	HT1	1.01084	0.132719	SCCOHT1
24	CTRL	Jun	HT1	1.2037	0.615896	SCCOHT1
25	BRG1	Brg1	HT1	1.28939	0.350101	SCCOHT1
25	BRG1	Jun	HT1	1.24015	0.37846	SCCOHT1
25	CTRL	Brg1	HT1	1.01098	0.132764	SCCOHT1
25	CTRL	Jun	HT1	1.20602	0.616755	SCCOHT1
26	BRG1	Brg1	HT1	1.29412	0.348879	SCCOHT1
26	BRG1	Jun	HT1	1.24309	0.378027	SCCOHT1
26	CTRL	Brg1	HT1	1.01126	0.132834	SCCOHT1
26	CTRL	Jun	HT1	1.20817	0.617656	SCCOHT1
27	BRG1	Brg1	HT1	1.29876	0.346653	SCCOHT1
27	BRG1	Jun	HT1	1.24532	0.375078	SCCOHT1
27	CTRL	Brg1	HT1	1.01162	0.132591	SCCOHT1
27	CTRL	Jun	HT1	1.20974	0.615009	SCCOHT1
28	BRG1	Brg1	HT1	1.30366	0.343893	SCCOHT1
28	BRG1	Jun	HT1	1.24752	0.372541	SCCOHT1
28	CTRL	Brg1	HT1	1.01187	0.132603	SCCOHT1
28	CTRL	Jun	HT1	1.21133	0.612445	SCCOHT1
29	BRG1	Brg1	HT1	1.30942	0.341508	SCCOHT1
29	BRG1	Jun	HT1	1.24977	0.369894	SCCOHT1
29	CTRL	Brg1	HT1	1.01222	0.132579	SCCOHT1
29	CTRL	Jun	HT1	1.21287	0.611248	SCCOHT1
30	BRG1	Brg1	HT1	1.31574	0.338117	SCCOHT1
30	BRG1	Jun	HT1	1.25183	0.366031	SCCOHT1
30	CTRL	Brg1	HT1	1.01245	0.13259	SCCOHT1
30	CTRL	Jun	HT1	1.2142	0.610308	SCCOHT1
31	BRG1	Brg1	HT1	1.32347	0.335134	SCCOHT1
31	BRG1	Jun	HT1	1.25425	0.362222	SCCOHT1
31	CTRL	Brg1	HT1	1.01266	0.132663	SCCOHT1
31	CTRL	Jun	HT1	1.21549	0.607271	SCCOHT1
32	BRG1	Brg1	HT1	1.33255	0.332297	SCCOHT1
32	BRG1	Jun	HT1	1.25707	0.358916	SCCOHT1
32	CTRL	Brg1	HT1	1.0129	0.132518	SCCOHT1
32	CTRL	Jun	HT1	1.21704	0.606764	SCCOHT1
33	BRG1	Brg1	HT1	1.34331	0.329469	SCCOHT1
33	BRG1	Jun	HT1	1.26073	0.357195	SCCOHT1
33	CTRL	Brg1	HT1	1.01308	0.132312	SCCOHT1
33	CTRL	Jun	HT1	1.21901	0.608688	SCCOHT1
34	BRG1	Brg1	HT1	1.356	0.327522	SCCOHT1
34	BRG1	Jun	HT1	1.26523	0.35617	SCCOHT1
34	CTRL	Brg1	HT1	1.01318	0.132337	SCCOHT1
34	CTRL	Jun	HT1	1.22094	0.608548	SCCOHT1
35	BRG1	Brg1	HT1	1.37073	0.326836	SCCOHT1
35	BRG1	Jun	HT1	1.27084	0.357072	SCCOHT1
35	CTRL	Brg1	HT1	1.01336	0.132519	SCCOHT1
35	CTRL	Jun	HT1	1.22353	0.611449	SCCOHT1
36	BRG1	Brg1	HT1	1.3875	0.327338	SCCOHT1
36	BRG1	Jun	HT1	1.278	0.360901	SCCOHT1
36	CTRL	Brg1	HT1	1.01362	0.132825	SCCOHT1
36	CTRL	Jun	HT1	1.22694	0.617554	SCCOHT1
37	BRG1	Brg1	HT1	1.40594	0.328714	SCCOHT1
37	BRG1	Jun	HT1	1.28635	0.367259	SCCOHT1
37	CTRL	Brg1	HT1	1.01381	0.133025	SCCOHT1
37	CTRL	Jun	HT1	1.23042	0.623206	SCCOHT1
38	BRG1	Brg1	HT1	1.42601	0.331854	SCCOHT1
38	BRG1	Jun	HT1	1.29596	0.377072	SCCOHT1
38	CTRL	Brg1	HT1	1.01402	0.13368	SCCOHT1
38	CTRL	Jun	HT1	1.2347	0.632234	SCCOHT1
39	BRG1	Brg1	HT1	1.4479	0.336391	SCCOHT1
39	BRG1	Jun	HT1	1.30701	0.388802	SCCOHT1
39	CTRL	Brg1	HT1	1.01429	0.134467	SCCOHT1
39	CTRL	Jun	HT1	1.2398	0.645327	SCCOHT1
40	BRG1	Brg1	HT1	1.47155	0.342114	SCCOHT1
40	BRG1	Jun	HT1	1.31979	0.40538	SCCOHT1
40	CTRL	Brg1	HT1	1.01458	0.13468	SCCOHT1
40	CTRL	Jun	HT1	1.24536	0.659595	SCCOHT1
41	BRG1	Brg1	HT1	1.49616	0.348304	SCCOHT1
41	BRG1	Jun	HT1	1.33312	0.423161	SCCOHT1
41	CTRL	Brg1	HT1	1.01485	0.135147	SCCOHT1
41	CTRL	Jun	HT1	1.2517	0.677867	SCCOHT1
42	BRG1	Brg1	HT1	1.52209	0.354919	SCCOHT1
42	BRG1	Jun	HT1	1.34727	0.440583	SCCOHT1
42	CTRL	Brg1	HT1	1.01512	0.135644	SCCOHT1
42	CTRL	Jun	HT1	1.25844	0.69668	SCCOHT1
43	BRG1	Brg1	HT1	1.55007	0.362321	SCCOHT1
43	BRG1	Jun	HT1	1.36231	0.460964	SCCOHT1
43	CTRL	Brg1	HT1	1.01529	0.135631	SCCOHT1
43	CTRL	Jun	HT1	1.26538	0.716754	SCCOHT1
44	BRG1	Brg1	HT1	1.57938	0.369381	SCCOHT1
44	BRG1	Jun	HT1	1.37718	0.480967	SCCOHT1
44	CTRL	Brg1	HT1	1.01548	0.13589	SCCOHT1
44	CTRL	Jun	HT1	1.27274	0.739555	SCCOHT1
45	BRG1	Brg1	HT1	1.60976	0.3763	SCCOHT1
45	BRG1	Jun	HT1	1.39169	0.498953	SCCOHT1
45	CTRL	Brg1	HT1	1.01566	0.136365	SCCOHT1
45	CTRL	Jun	HT1	1.27996	0.758972	SCCOHT1
46	BRG1	Brg1	HT1	1.64119	0.383233	SCCOHT1
46	BRG1	Jun	HT1	1.40518	0.516259	SCCOHT1
46	CTRL	Brg1	HT1	1.01574	0.136481	SCCOHT1
46	CTRL	Jun	HT1	1.28642	0.776626	SCCOHT1
47	BRG1	Brg1	HT1	1.67149	0.389506	SCCOHT1
47	BRG1	Jun	HT1	1.41717	0.531833	SCCOHT1
47	CTRL	Brg1	HT1	1.01574	0.136592	SCCOHT1
47	CTRL	Jun	HT1	1.29257	0.795051	SCCOHT1
48	BRG1	Brg1	HT1	1.6992	0.39503	SCCOHT1
48	BRG1	Jun	HT1	1.42733	0.544123	SCCOHT1
48	CTRL	Brg1	HT1	1.01577	0.1367	SCCOHT1
48	CTRL	Jun	HT1	1.29781	0.809238	SCCOHT1
49	BRG1	Brg1	HT1	1.72323	0.399648	SCCOHT1
49	BRG1	Jun	HT1	1.43546	0.554124	SCCOHT1
49	CTRL	Brg1	HT1	1.01584	0.137057	SCCOHT1
49	CTRL	Jun	HT1	1.30193	0.818868	SCCOHT1
50	BRG1	Brg1	HT1	1.74145	0.402759	SCCOHT1
50	BRG1	Jun	HT1	1.44147	0.561743	SCCOHT1
50	CTRL	Brg1	HT1	1.01582	0.137189	SCCOHT1
50	CTRL	Jun	HT1	1.30528	0.827381	SCCOHT1
51	BRG1	Brg1	HT1	1.75271	0.404444	SCCOHT1
51	BRG1	Jun	HT1	1.44562	0.566407	SCCOHT1
51	CTRL	Brg1	HT1	1.01577	0.13732	SCCOHT1
51	CTRL	Jun	HT1	1.30757	0.83406	SCCOHT1
52	BRG1	Brg1	HT1	1.7569	0.404757	SCCOHT1
52	BRG1	Jun	HT1	1.44803	0.569122	SCCOHT1
52	CTRL	Brg1	HT1	1.01576	0.137618	SCCOHT1
52	CTRL	Jun	HT1	1.30881	0.835974	SCCOHT1
53	BRG1	Brg1	HT1	1.75461	0.404194	SCCOHT1
53	BRG1	Jun	HT1	1.44888	0.570337	SCCOHT1
53	CTRL	Brg1	HT1	1.01572	0.137865	SCCOHT1
53	CTRL	Jun	HT1	1.30931	0.837024	SCCOHT1
54	BRG1	Brg1	HT1	1.74631	0.4025	SCCOHT1
54	BRG1	Jun	HT1	1.4482	0.569805	SCCOHT1
54	CTRL	Brg1	HT1	1.01561	0.138079	SCCOHT1
54	CTRL	Jun	HT1	1.30882	0.836865	SCCOHT1
55	BRG1	Brg1	HT1	1.73312	0.399609	SCCOHT1
55	BRG1	Jun	HT1	1.4459	0.56675	SCCOHT1
55	CTRL	Brg1	HT1	1.01549	0.138116	SCCOHT1
55	CTRL	Jun	HT1	1.30724	0.831171	SCCOHT1
56	BRG1	Brg1	HT1	1.71647	0.396504	SCCOHT1
56	BRG1	Jun	HT1	1.44216	0.561997	SCCOHT1
56	CTRL	Brg1	HT1	1.0154	0.138284	SCCOHT1
56	CTRL	Jun	HT1	1.30481	0.823372	SCCOHT1
57	BRG1	Brg1	HT1	1.69755	0.393242	SCCOHT1
57	BRG1	Jun	HT1	1.43674	0.555884	SCCOHT1
57	CTRL	Brg1	HT1	1.01532	0.138577	SCCOHT1
57	CTRL	Jun	HT1	1.30128	0.813508	SCCOHT1
58	BRG1	Brg1	HT1	1.67713	0.389682	SCCOHT1
58	BRG1	Jun	HT1	1.42957	0.546046	SCCOHT1
58	CTRL	Brg1	HT1	1.01517	0.138549	SCCOHT1
58	CTRL	Jun	HT1	1.29699	0.799815	SCCOHT1
59	BRG1	Brg1	HT1	1.65551	0.385711	SCCOHT1
59	BRG1	Jun	HT1	1.4211	0.535151	SCCOHT1
59	CTRL	Brg1	HT1	1.01507	0.138547	SCCOHT1
59	CTRL	Jun	HT1	1.29204	0.782761	SCCOHT1
60	BRG1	Brg1	HT1	1.63363	0.382079	SCCOHT1
60	BRG1	Jun	HT1	1.41122	0.522856	SCCOHT1
60	CTRL	Brg1	HT1	1.01492	0.13851	SCCOHT1
60	CTRL	Jun	HT1	1.28631	0.766402	SCCOHT1
61	BRG1	Brg1	HT1	1.61116	0.378182	SCCOHT1
61	BRG1	Jun	HT1	1.39982	0.506923	SCCOHT1
61	CTRL	Brg1	HT1	1.01469	0.13859	SCCOHT1
61	CTRL	Jun	HT1	1.28035	0.749036	SCCOHT1
62	BRG1	Brg1	HT1	1.58809	0.373984	SCCOHT1
62	BRG1	Jun	HT1	1.3877	0.490832	SCCOHT1
62	CTRL	Brg1	HT1	1.01444	0.138384	SCCOHT1
62	CTRL	Jun	HT1	1.27395	0.727138	SCCOHT1
63	BRG1	Brg1	HT1	1.56436	0.36902	SCCOHT1
63	BRG1	Jun	HT1	1.37464	0.473903	SCCOHT1
63	CTRL	Brg1	HT1	1.01417	0.137668	SCCOHT1
63	CTRL	Jun	HT1	1.26736	0.708041	SCCOHT1
64	BRG1	Brg1	HT1	1.53992	0.363544	SCCOHT1
64	BRG1	Jun	HT1	1.36099	0.455763	SCCOHT1
64	CTRL	Brg1	HT1	1.01396	0.137459	SCCOHT1
64	CTRL	Jun	HT1	1.26109	0.691152	SCCOHT1
65	BRG1	Brg1	HT1	1.5155	0.358658	SCCOHT1
65	BRG1	Jun	HT1	1.3473	0.437883	SCCOHT1
65	CTRL	Brg1	HT1	1.01379	0.137637	SCCOHT1
65	CTRL	Jun	HT1	1.25437	0.669323	SCCOHT1
66	BRG1	Brg1	HT1	1.49093	0.353415	SCCOHT1
66	BRG1	Jun	HT1	1.33364	0.421589	SCCOHT1
66	CTRL	Brg1	HT1	1.01362	0.136887	SCCOHT1
66	CTRL	Jun	HT1	1.24829	0.652261	SCCOHT1
67	BRG1	Brg1	HT1	1.46645	0.348857	SCCOHT1
67	BRG1	Jun	HT1	1.32088	0.407394	SCCOHT1
67	CTRL	Brg1	HT1	1.01357	0.136677	SCCOHT1
67	CTRL	Jun	HT1	1.24317	0.642229	SCCOHT1
68	BRG1	Brg1	HT1	1.44363	0.346012	SCCOHT1
68	BRG1	Jun	HT1	1.30931	0.395899	SCCOHT1
68	CTRL	Brg1	HT1	1.01353	0.136846	SCCOHT1
68	CTRL	Jun	HT1	1.23811	0.629669	SCCOHT1
69	BRG1	Brg1	HT1	1.42242	0.343975	SCCOHT1
69	BRG1	Jun	HT1	1.29863	0.387543	SCCOHT1
69	CTRL	Brg1	HT1	1.01334	0.136314	SCCOHT1
69	CTRL	Jun	HT1	1.23385	0.621336	SCCOHT1
70	BRG1	Brg1	HT1	1.40259	0.342792	SCCOHT1
70	BRG1	Jun	HT1	1.28972	0.382108	SCCOHT1
70	CTRL	Brg1	HT1	1.01326	0.136047	SCCOHT1
70	CTRL	Jun	HT1	1.2308	0.620408	SCCOHT1
71	BRG1	Brg1	HT1	1.38578	0.343637	SCCOHT1
71	BRG1	Jun	HT1	1.28247	0.379789	SCCOHT1
71	CTRL	Brg1	HT1	1.01309	0.135894	SCCOHT1
71	CTRL	Jun	HT1	1.22825	0.620506	SCCOHT1
72	BRG1	Brg1	HT1	1.3715	0.344885	SCCOHT1
72	BRG1	Jun	HT1	1.27645	0.378402	SCCOHT1
72	CTRL	Brg1	HT1	1.01285	0.135259	SCCOHT1
72	CTRL	Jun	HT1	1.22599	0.61963	SCCOHT1
73	BRG1	Brg1	HT1	1.35933	0.346521	SCCOHT1
73	BRG1	Jun	HT1	1.27188	0.379051	SCCOHT1
73	CTRL	Brg1	HT1	1.01264	0.135086	SCCOHT1
73	CTRL	Jun	HT1	1.22461	0.622416	SCCOHT1
74	BRG1	Brg1	HT1	1.3493	0.348983	SCCOHT1
74	BRG1	Jun	HT1	1.26822	0.381189	SCCOHT1
74	CTRL	Brg1	HT1	1.01238	0.135189	SCCOHT1
74	CTRL	Jun	HT1	1.2235	0.627323	SCCOHT1
75	BRG1	Brg1	HT1	1.3407	0.350847	SCCOHT1
75	BRG1	Jun	HT1	1.26521	0.383015	SCCOHT1
75	CTRL	Brg1	HT1	1.01213	0.134785	SCCOHT1
75	CTRL	Jun	HT1	1.22235	0.630295	SCCOHT1
76	BRG1	Brg1	HT1	1.33346	0.352919	SCCOHT1
76	BRG1	Jun	HT1	1.26281	0.385064	SCCOHT1
76	CTRL	Brg1	HT1	1.01194	0.134842	SCCOHT1
76	CTRL	Jun	HT1	1.22144	0.633388	SCCOHT1
77	BRG1	Brg1	HT1	1.32693	0.354409	SCCOHT1
77	BRG1	Jun	HT1	1.26064	0.386752	SCCOHT1
77	CTRL	Brg1	HT1	1.01168	0.134858	SCCOHT1
77	CTRL	Jun	HT1	1.22027	0.635482	SCCOHT1
78	BRG1	Brg1	HT1	1.32072	0.35585	SCCOHT1
78	BRG1	Jun	HT1	1.25825	0.388388	SCCOHT1
78	CTRL	Brg1	HT1	1.01144	0.134719	SCCOHT1
78	CTRL	Jun	HT1	1.21908	0.638551	SCCOHT1
79	BRG1	Brg1	HT1	1.31489	0.357308	SCCOHT1
79	BRG1	Jun	HT1	1.25565	0.389689	SCCOHT1
79	CTRL	Brg1	HT1	1.01126	0.134799	SCCOHT1
79	CTRL	Jun	HT1	1.2176	0.640332	SCCOHT1
80	BRG1	Brg1	HT1	1.30907	0.35762	SCCOHT1
80	BRG1	Jun	HT1	1.25302	0.389883	SCCOHT1
80	CTRL	Brg1	HT1	1.01099	0.134861	SCCOHT1
80	CTRL	Jun	HT1	1.21563	0.63814	SCCOHT1
81	BRG1	Brg1	HT1	1.30298	0.357782	SCCOHT1
81	BRG1	Jun	HT1	1.24977	0.389749	SCCOHT1
81	CTRL	Brg1	HT1	1.01072	0.134645	SCCOHT1
81	CTRL	Jun	HT1	1.21364	0.639698	SCCOHT1
82	BRG1	Brg1	HT1	1.29683	0.357809	SCCOHT1
82	BRG1	Jun	HT1	1.246	0.388833	SCCOHT1
82	CTRL	Brg1	HT1	1.01051	0.134517	SCCOHT1
82	CTRL	Jun	HT1	1.21109	0.638392	SCCOHT1
83	BRG1	Brg1	HT1	1.29088	0.357175	SCCOHT1
83	BRG1	Jun	HT1	1.24212	0.386873	SCCOHT1
83	CTRL	Brg1	HT1	1.01033	0.134193	SCCOHT1
83	CTRL	Jun	HT1	1.20828	0.634435	SCCOHT1
84	BRG1	Brg1	HT1	1.28461	0.355946	SCCOHT1
84	BRG1	Jun	HT1	1.23764	0.384911	SCCOHT1
84	CTRL	Brg1	HT1	1.01015	0.133874	SCCOHT1
84	CTRL	Jun	HT1	1.20538	0.632148	SCCOHT1
85	BRG1	Brg1	HT1	1.27796	0.354242	SCCOHT1
85	BRG1	Jun	HT1	1.23285	0.381635	SCCOHT1
85	CTRL	Brg1	HT1	1.00992	0.13383	SCCOHT1
85	CTRL	Jun	HT1	1.20199	0.627296	SCCOHT1
86	BRG1	Brg1	HT1	1.27173	0.352066	SCCOHT1
86	BRG1	Jun	HT1	1.22802	0.377856	SCCOHT1
86	CTRL	Brg1	HT1	1.00981	0.13348	SCCOHT1
86	CTRL	Jun	HT1	1.19872	0.622841	SCCOHT1
87	BRG1	Brg1	HT1	1.26571	0.349709	SCCOHT1
87	BRG1	Jun	HT1	1.22282	0.374289	SCCOHT1
87	CTRL	Brg1	HT1	1.00972	0.133033	SCCOHT1
87	CTRL	Jun	HT1	1.19527	0.617001	SCCOHT1
88	BRG1	Brg1	HT1	1.25952	0.347202	SCCOHT1
88	BRG1	Jun	HT1	1.2174	0.369564	SCCOHT1
88	CTRL	Brg1	HT1	1.00958	0.13293	SCCOHT1
88	CTRL	Jun	HT1	1.19162	0.610393	SCCOHT1
89	BRG1	Brg1	HT1	1.25338	0.344493	SCCOHT1
89	BRG1	Jun	HT1	1.21208	0.365559	SCCOHT1
89	CTRL	Brg1	HT1	1.00954	0.132976	SCCOHT1
89	CTRL	Jun	HT1	1.18822	0.605709	SCCOHT1
90	BRG1	Brg1	HT1	1.24753	0.34153	SCCOHT1
90	BRG1	Jun	HT1	1.20653	0.360874	SCCOHT1
90	CTRL	Brg1	HT1	1.00954	0.132711	SCCOHT1
90	CTRL	Jun	HT1	1.18461	0.598542	SCCOHT1
91	BRG1	Brg1	HT1	1.24179	0.338462	SCCOHT1
91	BRG1	Jun	HT1	1.2006	0.355194	SCCOHT1
91	CTRL	Brg1	HT1	1.00944	0.132367	SCCOHT1
91	CTRL	Jun	HT1	1.18093	0.591398	SCCOHT1
92	BRG1	Brg1	HT1	1.23601	0.335175	SCCOHT1
92	BRG1	Jun	HT1	1.19488	0.350403	SCCOHT1
92	CTRL	Brg1	HT1	1.00944	0.131906	SCCOHT1
92	CTRL	Jun	HT1	1.17758	0.586403	SCCOHT1
93	BRG1	Brg1	HT1	1.23054	0.332438	SCCOHT1
93	BRG1	Jun	HT1	1.18928	0.344738	SCCOHT1
93	CTRL	Brg1	HT1	1.00943	0.131704	SCCOHT1
93	CTRL	Jun	HT1	1.17408	0.578285	SCCOHT1
94	BRG1	Brg1	HT1	1.22488	0.328994	SCCOHT1
94	BRG1	Jun	HT1	1.18327	0.338449	SCCOHT1
94	CTRL	Brg1	HT1	1.00926	0.131389	SCCOHT1
94	CTRL	Jun	HT1	1.17074	0.572709	SCCOHT1
95	BRG1	Brg1	HT1	1.21942	0.325393	SCCOHT1
95	BRG1	Jun	HT1	1.17761	0.33324	SCCOHT1
95	CTRL	Brg1	HT1	1.00918	0.130716	SCCOHT1
95	CTRL	Jun	HT1	1.16767	0.567824	SCCOHT1
96	BRG1	Brg1	HT1	1.21445	0.322653	SCCOHT1
96	BRG1	Jun	HT1	1.17231	0.32753	SCCOHT1
96	CTRL	Brg1	HT1	1.00902	0.130384	SCCOHT1
96	CTRL	Jun	HT1	1.1647	0.562593	SCCOHT1
97	BRG1	Brg1	HT1	1.20926	0.319473	SCCOHT1
97	BRG1	Jun	HT1	1.16679	0.321757	SCCOHT1
97	CTRL	Brg1	HT1	1.00887	0.130222	SCCOHT1
97	CTRL	Jun	HT1	1.16176	0.557456	SCCOHT1
98	BRG1	Brg1	HT1	1.20426	0.31613	SCCOHT1
98	BRG1	Jun	HT1	1.16149	0.316499	SCCOHT1
98	CTRL	Brg1	HT1	1.00876	0.129899	SCCOHT1
98	CTRL	Jun	HT1	1.15893	0.552009	SCCOHT1
99	BRG1	Brg1	HT1	1.19966	0.3135	SCCOHT1
99	BRG1	Jun	HT1	1.15662	0.311997	SCCOHT1
99	CTRL	Brg1	HT1	1.00856	0.129712	SCCOHT1
99	CTRL	Jun	HT1	1.15645	0.548577	SCCOHT1
100	BRG1	Brg1	HT1	1.19518	0.310813	SCCOHT1
100	BRG1	Jun	HT1	1.15188	0.307303	SCCOHT1
100	CTRL	Brg1	HT1	1.00847	0.129615	SCCOHT1
100	CTRL	Jun	HT1	1.15397	0.544628	SCCOHT1
