# Supplementary material for: Re-expression of SMARCA4/BRG1 in small cell carcinoma of ovary, hypercalcemic type (SCCOHT) promotes an epithelial-like gene signature through an AP-1-dependent mechanism
Source: eLife. 2020 Dec 23;9:e59073. doi: 10.7554/eLife.59073 (PMC7813545; doi:10.7554/eLife.59073)
Supplement: Figure 5—source data 1. [file elife-59073-fig5-data1.xlsx]

## Sheet: Panel_A_B
Gene	Bin67	HT1
A4GALT	0.11549	-0.0823459
ADAM15	1.04342	0.552135
ADM	1.02033	1.2919
ALS2CL	1.93218	0.15383
ANGPTL4	2.32398	2.26354
AP1M2	0.303287	3.89725
AP1S1	0.250746	0.483891
APOBEC3C	1.63181	4.72728
ARHGEF18	0.606264	-0.0840764
AXIN1	0.150731	-0.334693
B3GNT3	2.17198	-1.76273
BIK	0.929838	-0.249519
BTG2	-0.374699	-0.0402221
C1orf116	7.46621	1.21147
CBLC	-0.949856	-0.0539941
CD44	7.5321	6.96602
CDC42EP2	1.05021	0.254176
CDH1	2.95158	-0.697191
CELSR1	-0.163462	0.485076
CHAC1	0.618676	-0.975551
CLDN4	6.11418	5.5296
CNKSR1	1.12953	0.426281
CORO2A	0.664445	1.59091
DAPP1	1.32887	2.1299
DFNA5	-0.551315	3.01371
DOK4	-0.0532977	0.542107
DSC2	-1.53526	-1.53027
DSG3	-0.364217	3.52853
DSP	2.60176	4.53023
EFNA1	0.63426	0.616125
EFNB1	1.83944	0.773287
EGFR	0.927503	4.89653
EHF	6.85401	4.36829
ELF3	5.86669	1.27687
EPCAM	0.541023	-0.103918
EPPK1	4.85984	1.42832
EPS8L1	0.104399	-0.830901
ETHE1	0.735787	0.10516
EVPL	-0.861197	-0.34641
EXT2	0.153207	0.852869
F3	7.83106	3.81076
FBXL18	-0.131071	0.095829
FERMT1	0.187445	2.46497
FGD6	0.638143	1.85484
FGFBP1	6.71999	-0.160966
FLNB	2.6654	2.1657
FST	3.96448	1.67633
G0S2	4.77087	6.38355
GJB3	7.54596	6.35398
GJB5	5.47804	2.14353
GLTP	0.164932	1.2309
GRB7	1.75663	0.0140355
HBEGF	2.68678	1.29348
HES2	-0.432682	0.481952
HMGA2	-0.517584	0.328107
IER3	2.48014	2.18937
IRF6	8.77496	6.77802
ITGB4	-0.320161	-0.512206
ITGB6	6.01328	-0.866836
JUP	0.110382	1.07711
KRT1	-0.665912	9.65609
KRT10	0.127916	-0.283157
KRT12	0.908833	2.33586
KRT13	7.8026	8.51797
KRT14	6.91252	6.6763
KRT15	7.05934	6.93983
KRT16	7.28951	5.45734
KRT17	8.35766	4.39436
KRT18	3.56168	1.25972
KRT19	4.31006	4.72641
KRT2	3.79206	3.09578
KRT20	-0.221624	-2.0207
KRT23	2.14865	0.909069
KRT24	-0.665912	0.64626
KRT25	-1.39026	0.796314
KRT26	-0.665912	NA
KRT27	0.8848	1.61473
KRT28	NA	6.50305
KRT3	2.0019	0.909069
KRT4	6.01941	-3.59912
KRT5	7.4192	7.83193
KRT6A	7.73157	3.99147
KRT6B	8.61594	7.09864
KRT6C	6.90625	6.84053
KRT7	9.00415	7.71219
KRT71	8.02251	4.9027
KRT72	-1.45277	2.32871
KRT73	0.435052	2.43224
KRT74	2.39433	4.04685
KRT75	8.49588	9.40065
KRT77	0.776761	NA
KRT78	4.92863	0.828185
KRT79	4.33332	4.68113
KRT8	5.56493	0.942953
KRT80	9.11539	7.27444
KRT9	7.07902	7.7356
LAD1	5.2888	5.61173
LAMA3	6.24269	4.5165
LAMA5	1.52655	0.489678
LAMB3	7.18144	7.98938
LIMK2	1.34962	0.729291
LLGL2	0.437053	0.399331
LRRC8E	0.830693	2.45773
LSR	-0.935713	-0.211717
MPZL2	3.9328	3.2044
MST1R	5.34546	1.66758
NQO1	0.369723	0.542986
NR2F6	-0.324334	-0.614454
OCLN	-0.464444	-0.456888
PCDH1	1.65739	2.07973
PDGFB	4.9669	0.828182
PDLIM1	0.986525	0.740121
PI3	5.79684	4.32797
PIP4K2C	0.386039	0.0246304
PLAGL2	0.221958	0.0273785
PORCN	1.68708	0.966891
PPL	1.79206	2.5556
PPP1R13L	0.835034	-0.276594
PRRG2	0.81737	0.138892
PRSS8	5.83009	1.48672
PTGES	6.97067	3.39608
RAB11FIP1	0.169697	-0.117406
RAB25	-0.0617554	-0.178058
RAB3D	-0.826475	-0.0567518
RAP1GAP2	0.0883576	0.3591
RASSF7	0.126907	-0.312793
RELB	0.54882	-0.411738
RHBDF2	0.0752205	0.327843
RHOD	2.58285	4.7651
RHOF	1.34942	0.254549
RIPK4	1.38895	0.413643
RPS6KA4	0.0929556	-0.320718
S100A14	8.48594	6.67496
S100A2	6.8551	2.61247
SCEL	3.51067	2.18504
SCNN1A	1.61716	5.72856
SDC4	2.85859	0.49337
SEMA3F	0.592679	0.427159
SFN	5.38675	2.7221
SH2D3A	-0.153029	-0.10944
SH3BP1	-0.485093	0.342194
SHC1	0.749395	0.042507
SLC10A3	0.0195562	0.549839
SLC12A4	0.193304	-0.386493
SLC35F2	-0.347394	0.168372
SLPI	5.28669	7.06926
SMAGP	0.211311	0.736996
SOX15	0.563779	-1.5034
SPINT1	0.170769	2.63037
SSH3	-0.137286	-0.446549
ST14	1.62755	2.62713
STXBP2	0.362027	-0.365968
TACSTD2	3.61649	4.37951
TAPBP	1.26336	0.178459
TBC1D2	2.43707	2.80179
TFCP2L1	-0.556866	2.02664
TGFA	3.82287	0.583886
THBD	-0.665912	5.87612
TJP1	0.354294	-0.274889
TMEM40	6.63114	6.76972
TMPRSS4	8.01536	7.15997
TNFRSF10B	0.082934	0.153213
TNFRSF21	3.49156	0.63616
TNFSF9	2.38571	2.04988
TNK1	-0.530096	-0.67614
TSPAN1	8.0643	5.09069
TUFT1	2.02072	1.32813
XYLT2	0.12802	0.708375
ZBED2	6.19593	0.109142
ZFYVE21	0.718759	0.165299

## Sheet: Panel_D
assay	peak_loc	group	BRG1_signal	CTRL_signal	log2_ratio	cell_line
ATAC	chr1:100355196-100355197	Non-Epi	291.962	166.041	0.810515	BIN67
ATAC	chr1:100456854-100456855	Non-Epi	98.4166	49.4872	0.977569	BIN67
ATAC	chr1:100622213-100622214	Non-Epi	299.116	103.491	1.52214	BIN67
ATAC	chr1:100895964-100895965	Non-Epi	1289.28	1133.63	0.185468	BIN67
ATAC	chr1:101002969-101002970	Non-Epi	169.23	85.2298	0.981229	BIN67
ATAC	chr1:10108428-10108429	Non-Epi	131.692	63.3943	1.04307	BIN67
ATAC	chr1:101174992-101174993	Non-Epi	302.945	171.759	0.815047	BIN67
ATAC	chr1:101260009-101260010	Non-Epi	89.2036	70.6403	0.332413	BIN67
ATAC	chr1:101261726-101261727	Non-Epi	127.501	65.7989	0.943882	BIN67
ATAC	chr1:10210076-10210077	Non-Epi	1612.82	1536.22	0.0701569	BIN67
ATAC	chr1:102892123-102892124	Non-Epi	217.698	172.361	0.335165	BIN67
ATAC	chr1:102892413-102892414	Non-Epi	198.622	128.511	0.624195	BIN67
ATAC	chr1:102919909-102919910	Non-Epi	178.407	168.575	0.0813142	BIN67
ATAC	chr1:103028614-103028615	Non-Epi	182.779	202.433	-0.146584	BIN67
ATAC	chr1:103084406-103084407	Non-Epi	1158.35	1199.62	-0.0504679	BIN67
ATAC	chr1:103112043-103112044	Non-Epi	599.044	585.236	0.0335871	BIN67
ATAC	chr1:103112380-103112381	Non-Epi	671.466	638.818	0.0718001	BIN67
ATAC	chr1:103112947-103112948	Non-Epi	285.441	288.768	-0.0166611	BIN67
ATAC	chr1:103177069-103177070	Non-Epi	312.484	311.643	0.00387377	BIN67
ATAC	chr1:103180958-103180959	Non-Epi	1259.83	1277.64	-0.0202278	BIN67
ATAC	chr1:103181538-103181539	Non-Epi	689.566	724.21	-0.070619	BIN67
ATAC	chr1:103191343-103191344	Non-Epi	712.942	566.602	0.330929	BIN67
ATAC	chr1:103197365-103197366	Non-Epi	944.966	953.84	-0.013471	BIN67
ATAC	chr1:103250488-103250489	Non-Epi	1098.8	1183.86	-0.107469	BIN67
ATAC	chr1:103256775-103256776	Non-Epi	149.124	132.329	0.17117	BIN67
ATAC	chr1:103265704-103265705	Non-Epi	484.748	403.826	0.262906	BIN67
ATAC	chr1:103438943-103438944	Non-Epi	588.115	489.657	0.263833	BIN67
ATAC	chr1:103441534-103441535	Non-Epi	208.322	226.056	-0.117319	BIN67
ATAC	chr1:103458106-103458107	Non-Epi	424.774	460.332	-0.115719	BIN67
ATAC	chr1:103459513-103459514	Non-Epi	369.893	406.231	-0.134844	BIN67
ATAC	chr1:103516705-103516706	Non-Epi	178.389	114.051	0.640815	BIN67
ATAC	chr1:10388111-10388112	Non-Epi	108.984	81.4281	0.416092	BIN67
ATAC	chr1:10474984-10474985	Non-Epi	1082.11	968.43	0.159976	BIN67
ATAC	chr1:104921623-104921624	Non-Epi	109.924	81.2819	0.430923	BIN67
ATAC	chr1:10528339-10528340	Non-Epi	138.683	120.842	0.197139	BIN67
ATAC	chr1:10599613-10599614	Non-Epi	120.727	105.928	0.187004	BIN67
ATAC	chr1:106063942-106063943	Non-Epi	79.5931	61.3798	0.369579	BIN67
ATAC	chr1:108502904-108502905	Non-Epi	286.398	161.427	0.823263	BIN67
ATAC	chr1:108720157-108720158	Non-Epi	226.387	123.507	0.868926	BIN67
ATAC	chr1:108747190-108747191	Non-Epi	1348.17	1154	0.224181	BIN67
ATAC	chr1:109041946-109041947	Non-Epi	1516.24	1414.59	0.100046	BIN67
ATAC	chr1:109075848-109075849	Non-Epi	531.753	616.95	-0.214024	BIN67
ATAC	chr1:109151346-109151347	Non-Epi	154.056	121.525	0.339714	BIN67
ATAC	chr1:109214646-109214647	Non-Epi	651.197	441.974	0.558088	BIN67
ATAC	chr1:109275078-109275079	Non-Epi	137.184	108.203	0.339578	BIN67
ATAC	chr1:109425744-109425745	Non-Epi	401.326	318.694	0.331672	BIN67
ATAC	chr1:109484084-109484085	Non-Epi	1245.38	1034.72	0.267119	BIN67
ATAC	chr1:109611058-109611059	Non-Epi	173.819	105.408	0.716251	BIN67
ATAC	chr1:109617553-109617554	Non-Epi	207.166	192.571	0.10487	BIN67
ATAC	chr1:109718804-109718805	Non-Epi	139.171	102.224	0.441408	BIN67
ATAC	chr1:109719326-109719327	Non-Epi	101.921	92.4108	0.139878	BIN67
ATAC	chr1:109808454-109808455	Non-Epi	191.378	140.273	0.445452	BIN67
ATAC	chr1:109822168-109822169	Non-Epi	245.716	107.195	1.18922	BIN67
ATAC	chr1:109959951-109959952	Non-Epi	118.252	94.0517	0.327225	BIN67
ATAC	chr1:110004086-110004087	Non-Epi	197.628	129.258	0.608696	BIN67
ATAC	chr1:110056550-110056551	Non-Epi	139.821	86.432	0.687629	BIN67
ATAC	chr1:110209864-110209865	Non-Epi	836.794	696.916	0.263543	BIN67
ATAC	chr1:110210185-110210186	Non-Epi	1085.87	851.486	0.350432	BIN67
ATAC	chr1:110236233-110236234	Non-Epi	192.841	84.385	1.18282	BIN67
ATAC	chr1:110236801-110236802	Non-Epi	135.088	84.3199	0.673586	BIN67
ATAC	chr1:110309659-110309660	Non-Epi	197.303	121.249	0.697888	BIN67
ATAC	chr1:110394334-110394335	Non-Epi	108.966	128.641	-0.237457	BIN67
ATAC	chr1:110477506-110477507	Non-Epi	241.995	142.45	0.760375	BIN67
ATAC	chr1:110635058-110635059	Non-Epi	126.453	112.134	0.17193	BIN67
ATAC	chr1:110916980-110916981	Non-Epi	126.272	118.925	0.0857832	BIN67
ATAC	chr1:110964062-110964063	Non-Epi	2176.87	1915.93	0.184118	BIN67
ATAC	chr1:111275272-111275273	Non-Epi	113.41	92.0209	0.29859	BIN67
ATAC	chr1:11134770-11134771	Non-Epi	103.511	69.3731	0.570557	BIN67
ATAC	chr1:111443689-111443690	Non-Epi	159.981	154.067	0.0540018	BIN67
ATAC	chr1:111538517-111538518	Non-Epi	162.474	100.583	0.686405	BIN67
ATAC	chr1:111593111-111593112	Non-Epi	264.504	85.0511	1.62547	BIN67
ATAC	chr1:112251983-112251984	Non-Epi	176.655	95.5302	0.880026	BIN67
ATAC	chr1:112391151-112391152	Non-Epi	460.217	448.862	0.0359613	BIN67
ATAC	chr1:112394687-112394688	Non-Epi	347.077	255.43	0.440845	BIN67
ATAC	chr1:112404784-112404785	Non-Epi	99.5727	90.8837	0.130359	BIN67
ATAC	chr1:112544439-112544440	Non-Epi	111.206	73.6298	0.588331	BIN67
ATAC	chr1:11262660-11262661	Non-Epi	1985.85	1876.81	0.0814335	BIN67
ATAC	chr1:112636979-112636980	Non-Epi	126.869	103.816	0.286803	BIN67
ATAC	chr1:112700859-112700860	Non-Epi	338.966	249.288	0.441801	BIN67
ATAC	chr1:112716266-112716267	Non-Epi	794.704	722.553	0.137133	BIN67
ATAC	chr1:11274113-11274114	Non-Epi	336.907	288.378	0.223672	BIN67
ATAC	chr1:112866290-112866291	Non-Epi	103.872	66.4487	0.636769	BIN67
ATAC	chr1:112866475-112866476	Non-Epi	112.092	71.079	0.649841	BIN67
ATAC	chr1:112869497-112869498	Non-Epi	103.312	95.4327	0.113312	BIN67
ATAC	chr1:112935631-112935632	Non-Epi	165.401	69.6655	1.23558	BIN67
ATAC	chr1:112956353-112956354	Non-Epi	2097.91	1803.9	0.217724	BIN67
ATAC	chr1:113073148-113073149	Non-Epi	1732.84	1428.76	0.278196	BIN67
ATAC	chr1:113353872-113353873	Non-Epi	147.697	109.21	0.432124	BIN67
ATAC	chr1:113389902-113389903	Non-Epi	2154.54	2088.12	0.0451596	BIN67
ATAC	chr1:113396743-113396744	Non-Epi	110.737	122.256	-0.141553	BIN67
ATAC	chr1:113457144-113457145	Non-Epi	123.996	37.1723	1.71129	BIN67
ATAC	chr1:113534483-113534484	Non-Epi	153.713	108.17	0.503014	BIN67
ATAC	chr1:113905030-113905031	Non-Epi	2633.84	2393.62	0.137918	BIN67
ATAC	chr1:113929458-113929459	Non-Epi	892.397	797.905	0.161278	BIN67
ATAC	chr1:114610969-114610970	Non-Epi	98.9043	69.0644	0.511865	BIN67
ATAC	chr1:114669349-114669350	Non-Epi	362.595	408.814	-0.172637	BIN67
ATAC	chr1:114669659-114669660	Non-Epi	896.317	1007.39	-0.168362	BIN67
ATAC	chr1:114670268-114670269	Non-Epi	1375.45	1288.26	0.0944061	BIN67
ATAC	chr1:114878305-114878306	Non-Epi	84.6332	113.808	-0.422976	BIN67
ATAC	chr1:115069689-115069690	Non-Epi	168.363	133.694	0.33044	BIN67
ATAC	chr1:115133486-115133487	Non-Epi	186.067	107.618	0.784294	BIN67
ATAC	chr1:115133698-115133699	Non-Epi	182.237	99.9818	0.859616	BIN67
ATAC	chr1:115135612-115135613	Non-Epi	244.813	105.831	1.20224	BIN67
ATAC	chr1:115166311-115166312	Non-Epi	79.8822	109.908	-0.455475	BIN67
ATAC	chr1:115190119-115190120	Non-Epi	116.265	60.4375	0.932576	BIN67
ATAC	chr1:115428511-115428512	Non-Epi	128.079	104.433	0.291922	BIN67
ATAC	chr1:115430958-115430959	Non-Epi	122.407	105.961	0.206341	BIN67
ATAC	chr1:115546185-115546186	Non-Epi	458.121	196.016	1.22057	BIN67
ATAC	chr1:115781489-115781490	Non-Epi	126.67	103.182	0.293306	BIN67
ATAC	chr1:115783017-115783018	Non-Epi	318.499	179.834	0.821147	BIN67
ATAC	chr1:115783255-115783256	Non-Epi	293.642	139.315	1.0703	BIN67
ATAC	chr1:116123123-116123124	Non-Epi	128.621	73.1586	0.805611	BIN67
ATAC	chr1:116376551-116376552	Non-Epi	334.523	267.55	0.321221	BIN67
ATAC	chr1:116377972-116377973	Non-Epi	201.169	157.397	0.352011	BIN67
ATAC	chr1:116509277-116509278	Non-Epi	320.577	98.5683	1.6914	BIN67
ATAC	chr1:116537749-116537750	Non-Epi	163.775	96.9599	0.750233	BIN67
ATAC	chr1:116538824-116538825	Non-Epi	136.786	83.8326	0.699739	BIN67
ATAC	chr1:116622063-116622064	Non-Epi	43.6444	58.8615	-0.423151	BIN67
ATAC	chr1:116693945-116693946	Non-Epi	196.273	93.8243	1.05687	BIN67
ATAC	chr1:11680951-11680952	Non-Epi	798.569	798.343	0.000407223	BIN67
ATAC	chr1:117077439-117077440	Non-Epi	257.928	83.1827	1.62096	BIN67
ATAC	chr1:117147094-117147095	Non-Epi	165.328	104.856	0.651935	BIN67
ATAC	chr1:117368785-117368786	Non-Epi	298.429	270.182	0.142955	BIN67
ATAC	chr1:117678589-117678590	Non-Epi	116.626	103.702	0.167914	BIN67
ATAC	chr1:117696190-117696191	Non-Epi	145.782	75.0594	0.948479	BIN67
ATAC	chr1:117826834-117826835	Non-Epi	245.825	127.666	0.939856	BIN67
ATAC	chr1:118023708-118023709	Non-Epi	85.5184	112.102	-0.386542	BIN67
ATAC	chr1:118902711-118902712	Non-Epi	157.235	73.3697	1.08928	BIN67
ATAC	chr1:118948014-118948015	Non-Epi	184.043	117.138	0.647388	BIN67
ATAC	chr1:119279626-119279627	Non-Epi	287.699	105.408	1.43996	BIN67
ATAC	chr1:119373856-119373857	Non-Epi	184.658	127.049	0.535952	BIN67
ATAC	chr1:119374450-119374451	Non-Epi	183.357	88.0568	1.04971	BIN67
ATAC	chr1:119674323-119674324	Non-Epi	114.982	131.939	-0.196863	BIN67
ATAC	chr1:11979849-11979850	Non-Epi	1601.85	1274.13	0.330002	BIN67
ATAC	chr1:11980035-11980036	Non-Epi	2190.08	1762.27	0.313384	BIN67
ATAC	chr1:11980219-11980220	Non-Epi	2295.56	1866.37	0.298468	BIN67
ATAC	chr1:120354799-120354800	Non-Epi	203.228	175.269	0.212406	BIN67
ATAC	chr1:12478312-12478313	Non-Epi	214.645	99.4619	1.10201	BIN67
ATAC	chr1:125080020-125080021	Non-Epi	62.6846	23.7201	1.36526	BIN67
ATAC	chr1:12550008-12550009	Non-Epi	132.45	108.398	0.286725	BIN67
ATAC	chr1:1282275-1282276	Non-Epi	259.68	143.214	0.85407	BIN67
ATAC	chr1:12851919-12851920	Non-Epi	252.274	114.1	1.13781	BIN67
ATAC	chr1:1318437-1318438	Non-Epi	187.385	136.813	0.450977	BIN67
ATAC	chr1:13524147-13524148	Non-Epi	236.467	81.1194	1.53193	BIN67
ATAC	chr1:14190914-14190915	Non-Epi	131.728	94.0355	0.481934	BIN67
ATAC	chr1:144551789-144551790	Non-Epi	1580.09	1397.5	0.177032	BIN67
ATAC	chr1:144552032-144552033	Non-Epi	1615.71	1410.05	0.196295	BIN67
ATAC	chr1:145706328-145706329	Non-Epi	183.032	122.987	0.569767	BIN67
ATAC	chr1:145748819-145748820	Non-Epi	113.501	108.268	0.0674914	BIN67
ATAC	chr1:145751815-145751816	Non-Epi	197.086	149.875	0.392772	BIN67
ATAC	chr1:145782672-145782673	Non-Epi	150.732	107.423	0.484858	BIN67
ATAC	chr1:145824357-145824358	Non-Epi	1151.61	1096.21	0.0710632	BIN67
ATAC	chr1:145927346-145927347	Non-Epi	1375.45	1418.88	-0.0448229	BIN67
ATAC	chr1:145927535-145927536	Non-Epi	1341.58	1403.55	-0.0651005	BIN67
ATAC	chr1:145956693-145956694	Non-Epi	223.37	187.714	0.249682	BIN67
ATAC	chr1:145979590-145979591	Non-Epi	154.634	165.878	-0.100637	BIN67
ATAC	chr1:146387468-146387469	Non-Epi	857.171	801.219	0.0972703	BIN67
ATAC	chr1:146387595-146387596	Non-Epi	833.236	790.886	0.0751626	BIN67
ATAC	chr1:146989502-146989503	Non-Epi	91.0462	97.9672	-0.104593	BIN67
ATAC	chr1:1471648-1471649	Non-Epi	855.617	780.911	0.131646	BIN67
ATAC	chr1:147167554-147167555	Non-Epi	257.133	159.704	0.683707	BIN67
ATAC	chr1:147242692-147242693	Non-Epi	2063.21	1892.77	0.12433	BIN67
ATAC	chr1:14724568-14724569	Non-Epi	94.3701	85.3273	0.143719	BIN67
ATAC	chr1:147538904-147538905	Non-Epi	279.714	245.942	0.184932	BIN67
ATAC	chr1:147539027-147539028	Non-Epi	273.644	229.581	0.25229	BIN67
ATAC	chr1:147540822-147540823	Non-Epi	523.227	450.942	0.214054	BIN67
ATAC	chr1:147541473-147541474	Non-Epi	1005.07	774.526	0.375481	BIN67
ATAC	chr1:147545246-147545247	Non-Epi	309.991	190.248	0.701426	BIN67
ATAC	chr1:147599867-147599868	Non-Epi	3219.84	2885.09	0.158317	BIN67
ATAC	chr1:147651504-147651505	Non-Epi	116.012	121.33	-0.0641245	BIN67
ATAC	chr1:147771580-147771581	Non-Epi	237.009	215.268	0.138197	BIN67
ATAC	chr1:147781210-147781211	Non-Epi	256.519	115.676	1.14217	BIN67
ATAC	chr1:147822219-147822220	Non-Epi	195.207	133.84	0.541133	BIN67
ATAC	chr1:147851317-147851318	Non-Epi	130.012	115.936	0.163978	BIN67
ATAC	chr1:147928350-147928351	Non-Epi	599.93	565.058	0.0862451	BIN67
ATAC	chr1:148038765-148038766	Non-Epi	618.175	567.982	0.121963	BIN67
ATAC	chr1:148166737-148166738	Non-Epi	121.847	118.162	0.0439375	BIN67
ATAC	chr1:148263364-148263365	Non-Epi	1014.95	932.069	0.122771	BIN67
ATAC	chr1:148424272-148424273	Non-Epi	116.915	77.5614	0.585852	BIN67
ATAC	chr1:149885607-149885608	Non-Epi	925.04	757.695	0.287556	BIN67
ATAC	chr1:149888224-149888225	Non-Epi	2326.88	2062.45	0.173961	BIN67
ATAC	chr1:149927751-149927752	Non-Epi	886.399	748.093	0.244439	BIN67
ATAC	chr1:149928050-149928051	Non-Epi	938.101	750.107	0.322261	BIN67
ATAC	chr1:149939370-149939371	Non-Epi	247.848	168.315	0.555554	BIN67
ATAC	chr1:149996154-149996155	Non-Epi	235.058	174.619	0.426695	BIN67
ATAC	chr1:150002283-150002284	Non-Epi	151.924	128.901	0.235408	BIN67
ATAC	chr1:150007193-150007194	Non-Epi	180.123	188.575	-0.0657945	BIN67
ATAC	chr1:150010714-150010715	Non-Epi	1256.91	1050.15	0.259056	BIN67
ATAC	chr1:150067219-150067220	Non-Epi	1241.32	1234	0.00852637	BIN67
ATAC	chr1:150191935-150191936	Non-Epi	83.0074	75.5468	0.134173	BIN67
ATAC	chr1:150235170-150235171	Non-Epi	1028.42	878.781	0.226622	BIN67
ATAC	chr1:15028556-15028557	Non-Epi	238.346	121.037	0.971775	BIN67
ATAC	chr1:150363746-150363747	Non-Epi	2690.88	2383.22	0.175099	BIN67
ATAC	chr1:150532540-150532541	Non-Epi	289.397	299.426	-0.0489813	BIN67
ATAC	chr1:150538106-150538107	Non-Epi	229.494	137.771	0.73202	BIN67
ATAC	chr1:150548738-150548739	Non-Epi	333.944	210.134	0.665763	BIN67
ATAC	chr1:150561499-150561500	Non-Epi	1664.25	1425.97	0.222786	BIN67
ATAC	chr1:150563869-150563870	Non-Epi	409.708	493.118	-0.266743	BIN67
ATAC	chr1:150568613-150568614	Non-Epi	677.897	683.821	-0.0125351	BIN67
ATAC	chr1:150569543-150569544	Non-Epi	488.253	552.012	-0.176729	BIN67
ATAC	chr1:150572328-150572329	Non-Epi	263.022	206.527	0.347359	BIN67
ATAC	chr1:150578463-150578464	Non-Epi	654.178	655.844	-0.00366435	BIN67
ATAC	chr1:150604658-150604659	Non-Epi	161.607	154.311	0.0662338	BIN67
ATAC	chr1:150620095-150620096	Non-Epi	176.673	234.926	-0.409112	BIN67
ATAC	chr1:150629471-150629472	Non-Epi	4662.74	4309.6	0.113599	BIN67
ATAC	chr1:150876842-150876843	Non-Epi	2937.94	2851.61	0.0430121	BIN67
ATAC	chr1:150985475-150985476	Non-Epi	151.563	188.461	-0.312495	BIN67
ATAC	chr1:151063196-151063197	Non-Epi	156.296	141.931	0.138168	BIN67
ATAC	chr1:151069944-151069945	Non-Epi	277.51	226.543	0.29159	BIN67
ATAC	chr1:151141867-151141868	Non-Epi	199.236	103.897	0.932723	BIN67
ATAC	chr1:151155835-151155836	Non-Epi	294.184	265.632	0.146762	BIN67
ATAC	chr1:151195322-151195323	Non-Epi	514.7	404.086	0.348303	BIN67
ATAC	chr1:151195571-151195572	Non-Epi	660.446	516.578	0.353847	BIN67
ATAC	chr1:151196061-151196062	Non-Epi	708.011	688.581	0.0400862	BIN67
ATAC	chr1:151196390-151196391	Non-Epi	764.499	753.844	0.0202217	BIN67
ATAC	chr1:151198414-151198415	Non-Epi	1479.32	1365.82	0.115083	BIN67
ATAC	chr1:151200298-151200299	Non-Epi	442.369	333.804	0.405193	BIN67
ATAC	chr1:151211004-151211005	Non-Epi	298.429	160.029	0.894892	BIN67
ATAC	chr1:151254942-151254943	Non-Epi	1203.51	1092.16	0.139934	BIN67
ATAC	chr1:151281810-151281811	Non-Epi	4689.42	4021.86	0.221498	BIN67
ATAC	chr1:151311684-151311685	Non-Epi	275.884	165.423	0.734426	BIN67
ATAC	chr1:151314360-151314361	Non-Epi	205.035	167.178	0.292899	BIN67
ATAC	chr1:151341243-151341244	Non-Epi	513.381	515.62	-0.00626392	BIN67
ATAC	chr1:151494905-151494906	Non-Epi	221.745	93.9868	1.22959	BIN67
ATAC	chr1:151511191-151511192	Non-Epi	1200.31	1158.27	0.0513909	BIN67
ATAC	chr1:151540066-151540067	Low-Epi	1327.65	1186.65	0.161844	BIN67
ATAC	chr1:151547284-151547285	Non-Epi	401.29	211.076	0.923652	BIN67
ATAC	chr1:151611319-151611320	Non-Epi	297.219	318.223	-0.098193	BIN67
ATAC	chr1:151612070-151612071	Non-Epi	1440.12	1368.46	0.073588	BIN67
ATAC	chr1:151616567-151616568	Non-Epi	179.78	166.236	0.112356	BIN67
ATAC	chr1:151790511-151790512	Non-Epi	3398.05	3024.39	0.168007	BIN67
ATAC	chr1:151837109-151837110	Non-Epi	387.199	312.325	0.309137	BIN67
ATAC	chr1:151841309-151841310	Non-Epi	213.037	144.01	0.561709	BIN67
ATAC	chr1:151886940-151886941	Non-Epi	121.214	77.4965	0.638713	BIN67
ATAC	chr1:151941631-151941632	Non-Epi	267.051	171.24	0.63809	BIN67
ATAC	chr1:151964686-151964687	Non-Epi	149.215	140.826	0.0829062	BIN67
ATAC	chr1:151972909-151972910	Non-Epi	202.253	124.092	0.700288	BIN67
ATAC	chr1:151988437-151988438	Non-Epi	303.614	157.105	0.946099	BIN67
ATAC	chr1:151988525-151988526	Non-Epi	313.784	153.449	1.02723	BIN67
ATAC	chr1:151988698-151988699	Non-Epi	309.774	162.596	0.925724	BIN67
ATAC	chr1:151989483-151989484	Non-Epi	313.802	220.109	0.509685	BIN67
ATAC	chr1:151989688-151989689	Non-Epi	320.685	232.327	0.463296	BIN67
ATAC	chr1:151990867-151990868	Non-Epi	222.919	151.419	0.554935	BIN67
ATAC	chr1:151992552-151992553	Non-Epi	278.775	166.203	0.742664	BIN67
ATAC	chr1:151995059-151995060	Non-Epi	217.319	144.189	0.588504	BIN67
ATAC	chr1:151995162-151995163	Non-Epi	234.625	144.043	0.700013	BIN67
ATAC	chr1:151999028-151999029	Non-Epi	364.871	182.45	0.995952	BIN67
ATAC	chr1:152001758-152001759	Non-Epi	248.426	220.369	0.172156	BIN67
ATAC	chr1:152048197-152048198	Non-Epi	516.272	271.4	0.925195	BIN67
ATAC	chr1:152048468-152048469	Non-Epi	477.017	220.792	1.10786	BIN67
ATAC	chr1:152163069-152163070	Non-Epi	185.76	155.432	0.255651	BIN67
ATAC	chr1:152168012-152168013	Non-Epi	293.154	187.031	0.6456	BIN67
ATAC	chr1:152183135-152183136	Non-Epi	285.061	181.637	0.647343	BIN67
ATAC	chr1:152187150-152187151	Non-Epi	349.191	222.254	0.649456	BIN67
ATAC	chr1:152189541-152189542	Non-Epi	407.504	402.429	0.0180345	BIN67
ATAC	chr1:152255463-152255464	Non-Epi	64.9427	42.1275	0.612603	BIN67
ATAC	chr1:152539971-152539972	Non-Epi	184.26	113.271	0.697087	BIN67
ATAC	chr1:152906328-152906329	Non-Epi	296.081	135.529	1.12164	BIN67
ATAC	chr1:153100441-153100442	Non-Epi	274.078	88.2192	1.62441	BIN67
ATAC	chr1:153447828-153447829	Non-Epi	131.583	99.137	0.404927	BIN67
ATAC	chr1:153490590-153490591	Non-Epi	220.932	153.043	0.526779	BIN67
ATAC	chr1:153534095-153534096	Non-Epi	330.313	156.455	1.07326	BIN67
ATAC	chr1:153565672-153565673	High-Epi	360.933	207.145	0.798137	BIN67
ATAC	chr1:153566616-153566617	High-Epi	481.425	202.238	1.24713	BIN67
ATAC	chr1:153566754-153566755	High-Epi	480.594	194.765	1.2987	BIN67
ATAC	chr1:153568769-153568770	High-Epi	392.763	402.056	-0.0336513	BIN67
ATAC	chr1:153747652-153747653	Non-Epi	142.82	141.346	0.0148614	BIN67
ATAC	chr1:153750977-153750978	Non-Epi	126.869	153.352	-0.271563	BIN67
ATAC	chr1:153783648-153783649	Non-Epi	895.685	859.837	0.0588605	BIN67
ATAC	chr1:153958773-153958774	Non-Epi	2596.64	2102.77	0.304225	BIN67
ATAC	chr1:153963471-153963472	Non-Epi	1635.69	1491.02	0.133514	BIN67
ATAC	chr1:153963826-153963827	Non-Epi	1720.56	1600.03	0.10471	BIN67
ATAC	chr1:153967522-153967523	Non-Epi	2068.19	2053.58	0.0102281	BIN67
ATAC	chr1:154189204-154189205	Non-Epi	123.418	117.561	0.0695737	BIN67
ATAC	chr1:154305213-154305214	Non-Epi	212.802	172.182	0.303991	BIN67
ATAC	chr1:154326771-154326772	Non-Epi	602.368	439.715	0.453193	BIN67
ATAC	chr1:154423639-154423640	Non-Epi	156.531	117.025	0.416548	BIN67
ATAC	chr1:154474972-154474973	Non-Epi	153.659	113.499	0.433751	BIN67
ATAC	chr1:154484603-154484604	Non-Epi	152.159	141.265	0.106456	BIN67
ATAC	chr1:154608043-154608044	Non-Epi	1071.06	853.355	0.327474	BIN67
ATAC	chr1:154697851-154697852	Non-Epi	110.267	97.3011	0.178747	BIN67
ATAC	chr1:154730427-154730428	Non-Epi	165.021	123.442	0.415895	BIN67
ATAC	chr1:154741533-154741534	Non-Epi	78.9789	132.491	-0.739054	BIN67
ATAC	chr1:154746473-154746474	Non-Epi	95.454	152.735	-0.672528	BIN67
ATAC	chr1:154855489-154855490	Non-Epi	148.492	126.529	0.229245	BIN67
ATAC	chr1:154937267-154937268	Non-Epi	2760.06	2223.73	0.311592	BIN67
ATAC	chr1:154956163-154956164	Non-Epi	680.913	672.773	0.0173244	BIN67
ATAC	chr1:154972583-154972584	Low-Epi	450.715	320.969	0.488493	BIN67
ATAC	chr1:154972859-154972860	Low-Epi	585.387	373.51	0.646849	BIN67
ATAC	chr1:154974082-154974083	Low-Epi	3514.35	3033.77	0.212081	BIN67
ATAC	chr1:154974298-154974299	Low-Epi	4423.47	3927.01	0.171708	BIN67
ATAC	chr1:155001040-155001041	Non-Epi	1362.08	1124.27	0.276604	BIN67
ATAC	chr1:155002153-155002154	Non-Epi	2553.05	2195.6	0.217514	BIN67
ATAC	chr1:155084982-155084983	Non-Epi	2361.17	1974.45	0.257927	BIN67
ATAC	chr1:155123982-155123983	Non-Epi	160.162	126.561	0.33732	BIN67
ATAC	chr1:155135204-155135205	Non-Epi	953.89	728.467	0.388491	BIN67
ATAC	chr1:155167875-155167876	Non-Epi	543.206	531.509	0.031349	BIN67
ATAC	chr1:155224992-155224993	Non-Epi	210.635	176.666	0.252409	BIN67
ATAC	chr1:155321008-155321009	Non-Epi	1099.42	914.848	0.264873	BIN67
ATAC	chr1:155324419-155324420	Non-Epi	2355.03	2032.76	0.212204	BIN67
ATAC	chr1:155325423-155325424	Non-Epi	842.376	745.477	0.176079	BIN67
ATAC	chr1:155467163-155467164	Non-Epi	138.972	107.536	0.366958	BIN67
ATAC	chr1:155563129-155563130	Non-Epi	2298.3	1919.1	0.260014	BIN67
ATAC	chr1:155610050-155610051	Non-Epi	1347.45	1327.19	0.02184	BIN67
ATAC	chr1:155651382-155651383	Non-Epi	144.446	80.9732	0.827255	BIN67
ATAC	chr1:155706218-155706219	Non-Epi	122.19	130.59	-0.0951714	BIN67
ATAC	chr1:155760253-155760254	Non-Epi	115.325	103.848	0.149859	BIN67
ATAC	chr1:155763658-155763659	Non-Epi	242.681	108.073	1.15971	BIN67
ATAC	chr1:155801587-155801588	Non-Epi	76.8292	81.5094	-0.0842461	BIN67
ATAC	chr1:155859338-155859339	Non-Epi	1096.13	1227.76	-0.163465	BIN67
ATAC	chr1:155893768-155893769	Non-Epi	203.517	145.407	0.482234	BIN67
ATAC	chr1:155910916-155910917	Non-Epi	801.532	663.155	0.273039	BIN67
ATAC	chr1:155911694-155911695	Non-Epi	1012.67	855.97	0.242274	BIN67
ATAC	chr1:155931555-155931556	Non-Epi	326.249	226.966	0.521572	BIN67
ATAC	chr1:155932750-155932751	Non-Epi	264.648	164.091	0.686255	BIN67
ATAC	chr1:155962212-155962213	Non-Epi	274.981	148.624	0.883227	BIN67
ATAC	chr1:156086467-156086468	Non-Epi	263.618	183.197	0.522664	BIN67
ATAC	chr1:156114411-156114412	Non-Epi	1218.57	1087.89	0.163518	BIN67
ATAC	chr1:156119720-156119721	Non-Epi	409.889	281.392	0.541049	BIN67
ATAC	chr1:156123193-156123194	Non-Epi	601.718	562.28	0.0976303	BIN67
ATAC	chr1:156123555-156123556	Non-Epi	771.183	546.537	0.495986	BIN67
ATAC	chr1:156123950-156123951	Non-Epi	690.253	396.905	0.796788	BIN67
ATAC	chr1:156125474-156125475	Non-Epi	343.013	304.787	0.169936	BIN67
ATAC	chr1:156126412-156126413	Non-Epi	438.864	305.827	0.519635	BIN67
ATAC	chr1:156126863-156126864	Non-Epi	453.154	334.665	0.436161	BIN67
ATAC	chr1:156213475-156213476	Non-Epi	1307.07	1227.52	0.0905274	BIN67
ATAC	chr1:156338626-156338627	Non-Epi	3705	3143.14	0.237198	BIN67
ATAC	chr1:156338673-156338674	Non-Epi	3601.28	3043.43	0.242734	BIN67
ATAC	chr1:156446945-156446946	Non-Epi	145.511	122.012	0.252212	BIN67
ATAC	chr1:156457260-156457261	Non-Epi	1997.6	1705.41	0.228023	BIN67
ATAC	chr1:156503440-156503441	Non-Epi	282.894	231.352	0.289038	BIN67
ATAC	chr1:156728536-156728537	Non-Epi	2608.08	2291.78	0.186438	BIN67
ATAC	chr1:156729247-156729248	Non-Epi	1490.72	1337.8	0.156038	BIN67
ATAC	chr1:156741187-156741188	Non-Epi	2929.01	2625.13	0.157969	BIN67
ATAC	chr1:156746874-156746875	Non-Epi	780.035	480.998	0.696359	BIN67
ATAC	chr1:15680916-15680917	Non-Epi	205.757	140.403	0.548121	BIN67
ATAC	chr1:156897062-156897063	Non-Epi	375.421	146.577	1.35088	BIN67
ATAC	chr1:157045242-157045243	Non-Epi	428.17	339.327	0.334627	BIN67
ATAC	chr1:157045859-157045860	Non-Epi	1387.01	1278.09	0.1179	BIN67
ATAC	chr1:157138650-157138651	Non-Epi	1177.82	1009.4	0.222411	BIN67
ATAC	chr1:15795139-15795140	Non-Epi	182.038	114.912	0.659109	BIN67
ATAC	chr1:15795302-15795303	Non-Epi	178.985	99.3319	0.843098	BIN67
ATAC	chr1:157962785-157962786	Non-Epi	448.095	183.018	1.28717	BIN67
ATAC	chr1:15796948-15796949	Non-Epi	174.144	121.85	0.511646	BIN67
ATAC	chr1:15799237-15799238	Non-Epi	238.852	94.1005	1.33462	BIN67
ATAC	chr1:158010967-158010968	Non-Epi	233.324	112.589	1.04468	BIN67
ATAC	chr1:158045810-158045811	Non-Epi	221.293	125.424	0.814191	BIN67
ATAC	chr1:159890003-159890004	Non-Epi	216.867	191.304	0.180058	BIN67
ATAC	chr1:159960876-159960877	Non-Epi	422.208	108.917	1.94495	BIN67
ATAC	chr1:159971069-159971070	Non-Epi	223.75	135.269	0.721856	BIN67
ATAC	chr1:160044230-160044231	Non-Epi	86.7107	116.651	-0.423686	BIN67
ATAC	chr1:160125213-160125214	Non-Epi	354.43	145.017	1.28342	BIN67
ATAC	chr1:160206201-160206202	Non-Epi	485.507	307.305	0.658102	BIN67
ATAC	chr1:160206450-160206451	Non-Epi	425.785	240.288	0.822756	BIN67
ATAC	chr1:160217796-160217797	Non-Epi	230	181.15	0.342767	BIN67
ATAC	chr1:160219383-160219384	Non-Epi	399.447	271.221	0.556832	BIN67
ATAC	chr1:160261844-160261845	Non-Epi	788.489	598.298	0.397644	BIN67
ATAC	chr1:160262510-160262511	Non-Epi	1706.57	1573.49	0.117066	BIN67
ATAC	chr1:160344243-160344244	Non-Epi	184.712	168.266	0.13377	BIN67
ATAC	chr1:160520827-160520828	Non-Epi	170.368	136.894	0.31354	BIN67
ATAC	chr1:160578780-160578781	Non-Epi	151.744	142.158	0.0935035	BIN67
ATAC	chr1:160996310-160996311	Non-Epi	215.332	114.701	0.90284	BIN67
ATAC	chr1:161021026-161021027	Non-Epi	1208.89	1229.9	-0.0248399	BIN67
ATAC	chr1:161045248-161045249	Non-Epi	662.722	589.916	0.167628	BIN67
ATAC	chr1:161083636-161083637	Non-Epi	429.254	230.41	0.894738	BIN67
ATAC	chr1:161132997-161132998	Non-Epi	2034.12	1814.21	0.164978	BIN67
ATAC	chr1:161159299-161159300	Non-Epi	1348.13	1151.81	0.226885	BIN67
ATAC	chr1:161166144-161166145	Non-Epi	2539.07	2280.74	0.154736	BIN67
ATAC	chr1:16145663-16145664	Non-Epi	345.018	192.864	0.835804	BIN67
ATAC	chr1:161539952-161539953	Non-Epi	577.168	517.813	0.156275	BIN67
ATAC	chr1:161540289-161540290	Non-Epi	596.208	533.361	0.16042	BIN67
ATAC	chr1:1615818-1615819	Non-Epi	1276.06	1263.96	0.0137342	BIN67
ATAC	chr1:16164327-16164328	Non-Epi	127.989	106.497	0.262952	BIN67
ATAC	chr1:161726111-161726112	Non-Epi	340.123	347.126	-0.0293181	BIN67
ATAC	chr1:16173455-16173456	Non-Epi	227.886	137.853	0.721077	BIN67
ATAC	chr1:161744274-161744275	Non-Epi	157.813	147.454	0.097312	BIN67
ATAC	chr1:161962598-161962599	Non-Epi	127.501	107.683	0.241655	BIN67
ATAC	chr1:161976824-161976825	Non-Epi	78.2563	157.43	-0.999246	BIN67
ATAC	chr1:162024363-162024364	Non-Epi	452.088	499.227	-0.142791	BIN67
ATAC	chr1:162055316-162055317	Non-Epi	219.956	180.988	0.27992	BIN67
ATAC	chr1:16206678-16206679	Non-Epi	773.134	684.731	0.174941	BIN67
ATAC	chr1:162349943-162349944	Non-Epi	211.881	152.231	0.474341	BIN67
ATAC	chr1:16249246-16249247	Non-Epi	99.5005	94.2305	0.0777072	BIN67
ATAC	chr1:162539211-162539212	Non-Epi	298.61	105.571	1.49128	BIN67
ATAC	chr1:162541961-162541962	Non-Epi	205.703	88.4792	1.20794	BIN67
ATAC	chr1:162561479-162561480	Non-Epi	3908.81	3144.85	0.31365	BIN67
ATAC	chr1:162605562-162605563	Non-Epi	186.825	87.1469	1.09141	BIN67
ATAC	chr1:162663410-162663411	Non-Epi	206.299	143.783	0.517825	BIN67
ATAC	chr1:162676320-162676321	Non-Epi	201.602	162.141	0.312528	BIN67
ATAC	chr1:162790513-162790514	Non-Epi	407.305	372.698	0.127776	BIN67
ATAC	chr1:162902265-162902266	Non-Epi	140.092	125.587	0.156513	BIN67
ATAC	chr1:162905893-162905894	Non-Epi	176.402	135.367	0.379529	BIN67
ATAC	chr1:162916472-162916473	Non-Epi	109.039	100.762	0.112817	BIN67
ATAC	chr1:163035816-163035817	Non-Epi	630.748	383.811	0.7152	BIN67
ATAC	chr1:163036228-163036229	Non-Epi	642.887	412.47	0.639026	BIN67
ATAC	chr1:163046620-163046621	Non-Epi	169.447	124.449	0.442219	BIN67
ATAC	chr1:163168323-163168324	Non-Epi	202.018	140.631	0.519471	BIN67
ATAC	chr1:163171225-163171226	Non-Epi	300.958	272.456	0.143041	BIN67
ATAC	chr1:163203571-163203572	Non-Epi	234.805	216.421	0.117102	BIN67
ATAC	chr1:163244549-163244550	Non-Epi	215.061	113.84	0.911808	BIN67
ATAC	chr1:16324631-16324632	Non-Epi	108.298	89.2915	0.275605	BIN67
ATAC	chr1:16348871-16348872	Non-Epi	166.972	116.375	0.517102	BIN67
ATAC	chr1:16352507-16352508	Non-Epi	1110.47	987.049	0.169821	BIN67
ATAC	chr1:16352610-16352611	Non-Epi	1093.28	917.448	0.252708	BIN67
ATAC	chr1:16367392-16367393	Non-Epi	2481.55	2204.77	0.170544	BIN67
ATAC	chr1:16367826-16367827	Non-Epi	1350.66	1240.2	0.122996	BIN67
ATAC	chr1:16375811-16375812	Non-Epi	187.982	143.701	0.385166	BIN67
ATAC	chr1:16441025-16441026	Non-Epi	600.743	587.804	0.0313602	BIN67
ATAC	chr1:164637993-164637994	Non-Epi	239.9	103.361	1.20685	BIN67
ATAC	chr1:164733356-164733357	Non-Epi	156.368	133.352	0.228122	BIN67
ATAC	chr1:164771886-164771887	Non-Epi	192.895	114.214	0.750962	BIN67
ATAC	chr1:165116791-165116792	Non-Epi	799.31	192.864	2.04552	BIN67
ATAC	chr1:165116991-165116992	Non-Epi	765.132	192.344	1.98642	BIN67
ATAC	chr1:165482395-165482396	Non-Epi	291.836	145.001	1.00411	BIN67
ATAC	chr1:165598152-165598153	Non-Epi	1457.03	1221.55	0.254122	BIN67
ATAC	chr1:165631067-165631068	Non-Epi	2096.72	1764.86	0.248453	BIN67
ATAC	chr1:165631954-165631955	Non-Epi	788.959	728.305	0.115256	BIN67
ATAC	chr1:165828654-165828655	Non-Epi	796.257	821.397	-0.044791	BIN67
ATAC	chr1:16621114-16621115	Non-Epi	513.291	447.335	0.198008	BIN67
ATAC	chr1:166905961-166905962	Non-Epi	387.235	161.313	1.25815	BIN67
ATAC	chr1:166952261-166952262	Non-Epi	382.141	136.829	1.475	BIN67
ATAC	chr1:167077513-167077514	Non-Epi	174.361	98.2108	0.821756	BIN67
ATAC	chr1:167173839-167173840	Non-Epi	101.704	73.7272	0.458791	BIN67
ATAC	chr1:167600461-167600462	Non-Epi	280.473	171.889	0.703146	BIN67
ATAC	chr1:167663149-167663150	Non-Epi	214.79	179.119	0.260673	BIN67
ATAC	chr1:167715137-167715138	Non-Epi	1933.07	1911.21	0.0164017	BIN67
ATAC	chr1:167716747-167716748	Non-Epi	568.804	620.329	-0.124892	BIN67
ATAC	chr1:167796277-167796278	Non-Epi	205.143	238.468	-0.216189	BIN67
ATAC	chr1:167797222-167797223	Non-Epi	297.671	223.586	0.411285	BIN67
ATAC	chr1:167820224-167820225	Non-Epi	161.173	129.161	0.317243	BIN67
ATAC	chr1:167822225-167822226	Non-Epi	210.364	186.674	0.1715	BIN67
ATAC	chr1:167922913-167922914	Non-Epi	135.323	73.1748	0.878027	BIN67
ATAC	chr1:167935358-167935359	Non-Epi	915.629	763.852	0.261157	BIN67
ATAC	chr1:168113059-168113060	Non-Epi	366.895	135.757	1.42768	BIN67
ATAC	chr1:168113258-168113259	Non-Epi	362.451	152.588	1.24269	BIN67
ATAC	chr1:168223918-168223919	Non-Epi	165.039	134.197	0.29646	BIN67
ATAC	chr1:168225793-168225794	Non-Epi	904.266	700.149	0.368621	BIN67
ATAC	chr1:168227586-168227587	Non-Epi	148.022	159.542	-0.107422	BIN67
ATAC	chr1:168301861-168301862	Non-Epi	306.342	107.585	1.50102	BIN67
ATAC	chr1:168321243-168321244	Non-Epi	267.701	196.942	0.440927	BIN67
ATAC	chr1:168408853-168408854	Non-Epi	222.81	102.955	1.10632	BIN67
ATAC	chr1:168409089-168409090	Non-Epi	204.131	100.534	1.01458	BIN67
ATAC	chr1:168471131-168471132	Non-Epi	175.138	159.753	0.131855	BIN67
ATAC	chr1:168471477-168471478	Non-Epi	141.429	114.441	0.303081	BIN67
ATAC	chr1:168763234-168763235	Non-Epi	198.965	172.214	0.207188	BIN67
ATAC	chr1:169059451-169059452	Non-Epi	152.286	97.5772	0.636896	BIN67
ATAC	chr1:169363232-169363233	Non-Epi	206.48	125.229	0.716927	BIN67
ATAC	chr1:169486065-169486066	Non-Epi	1773.69	1693.88	0.0663842	BIN67
ATAC	chr1:169511755-169511756	Non-Epi	120.221	83.9951	0.512186	BIN67
ATAC	chr1:169529444-169529445	Non-Epi	222.702	111.549	0.99102	BIN67
ATAC	chr1:169781354-169781355	Non-Epi	169.953	105.116	0.687961	BIN67
ATAC	chr1:170532204-170532205	Non-Epi	1574.7	1624.57	-0.0449485	BIN67
ATAC	chr1:17054171-17054172	Non-Epi	1678.21	1587.15	0.0804373	BIN67
ATAC	chr1:170569071-170569072	Non-Epi	104.541	104.271	0.00369123	BIN67
ATAC	chr1:171313945-171313946	Non-Epi	592.523	710.222	-0.260997	BIN67
ATAC	chr1:171435036-171435037	Non-Epi	182.201	109.665	0.727231	BIN67
ATAC	chr1:171438649-171438650	Non-Epi	324.533	94.2629	1.77282	BIN67
ATAC	chr1:171781461-171781462	Non-Epi	3481.44	3363.15	0.0498538	BIN67
ATAC	chr1:171817753-171817754	Non-Epi	340.719	184.221	0.883565	BIN67
ATAC	chr1:171868285-171868286	Non-Epi	190.312	112.183	0.757269	BIN67
ATAC	chr1:171936854-171936855	Non-Epi	65.2859	101.476	-0.628519	BIN67
ATAC	chr1:171937378-171937379	Non-Epi	140.327	132.443	0.0828151	BIN67
ATAC	chr1:172136995-172136996	Non-Epi	246.854	318.759	-0.367492	BIN67
ATAC	chr1:172137569-172137570	Non-Epi	258.308	297.427	-0.202715	BIN67
ATAC	chr1:172255300-172255301	Non-Epi	1073.41	1128	-0.0715093	BIN67
ATAC	chr1:172258490-172258491	Non-Epi	169.628	174.002	-0.036515	BIN67
ATAC	chr1:172269733-172269734	Non-Epi	311.49	311.724	-0.00108118	BIN67
ATAC	chr1:172287549-172287550	Non-Epi	107.666	73.7597	0.539565	BIN67
ATAC	chr1:172322599-172322600	Non-Epi	1859.4	1616.64	0.201726	BIN67
ATAC	chr1:172322718-172322719	Non-Epi	1818.03	1589.54	0.193657	BIN67
ATAC	chr1:172325834-172325835	Non-Epi	401.868	319.149	0.331563	BIN67
ATAC	chr1:17233959-17233960	Non-Epi	211.285	102.727	1.0332	BIN67
ATAC	chr1:172343708-172343709	Non-Epi	774.507	798.522	-0.0439984	BIN67
ATAC	chr1:172343792-172343793	Non-Epi	864.361	877.253	-0.0213353	BIN67
ATAC	chr1:172344742-172344743	Non-Epi	946.772	931.647	0.0232088	BIN67
ATAC	chr1:172352493-172352494	Non-Epi	529.134	577.617	-0.126251	BIN67
ATAC	chr1:172354333-172354334	Non-Epi	311.273	304.413	0.0320463	BIN67
ATAC	chr1:172356824-172356825	Non-Epi	738.956	718.264	0.0409177	BIN67
ATAC	chr1:172358421-172358422	Non-Epi	991.825	954.636	0.0550782	BIN67
ATAC	chr1:172359612-172359613	Non-Epi	867.937	770.546	0.171501	BIN67
ATAC	chr1:17237321-17237322	Non-Epi	221.51	231.547	-0.063655	BIN67
ATAC	chr1:172398617-172398618	Non-Epi	265.714	257.461	0.0453493	BIN67
ATAC	chr1:172418034-172418035	Non-Epi	161.571	130.883	0.301812	BIN67
ATAC	chr1:172452697-172452698	Non-Epi	206.787	134.132	0.620734	BIN67
ATAC	chr1:172467069-172467070	Non-Epi	239.936	189.03	0.342424	BIN67
ATAC	chr1:172499833-172499834	Non-Epi	252.888	137.674	0.872496	BIN67
ATAC	chr1:172532691-172532692	Non-Epi	5270.91	4861.53	0.116618	BIN67
ATAC	chr1:172532866-172532867	Non-Epi	5548.11	5080.36	0.127043	BIN67
ATAC	chr1:172532945-172532946	Non-Epi	5511.28	5004.94	0.139007	BIN67
ATAC	chr1:172588832-172588833	Non-Epi	166.557	125.651	0.403786	BIN67
ATAC	chr1:172654683-172654684	Non-Epi	192.407	161.638	0.249981	BIN67
ATAC	chr1:172746420-172746421	Non-Epi	255.797	149.957	0.766493	BIN67
ATAC	chr1:172917896-172917897	Non-Epi	342.001	113.531	1.58247	BIN67
ATAC	chr1:172918237-172918238	Non-Epi	369.893	93.142	1.97809	BIN67
ATAC	chr1:172934073-172934074	Non-Epi	185.778	145.034	0.35502	BIN67
ATAC	chr1:172970016-172970017	Non-Epi	184.947	135.269	0.448426	BIN67
ATAC	chr1:172970330-172970331	Non-Epi	200.338	124.449	0.682514	BIN67
ATAC	chr1:172976429-172976430	Non-Epi	170.567	105.213	0.691811	BIN67
ATAC	chr1:173190690-173190691	Non-Epi	218.222	92.2808	1.23274	BIN67
ATAC	chr1:173269629-173269630	Non-Epi	289.325	126.854	1.18317	BIN67
ATAC	chr1:173367325-173367326	Non-Epi	124.376	153.612	-0.302395	BIN67
ATAC	chr1:173507441-173507442	Non-Epi	455.105	195.415	1.21546	BIN67
ATAC	chr1:174153585-174153586	Non-Epi	208.015	159.704	0.379199	BIN67
ATAC	chr1:174352156-174352157	Non-Epi	59.2523	81.883	-0.460061	BIN67
ATAC	chr1:17441606-17441607	Non-Epi	212.947	161.914	0.393143	BIN67
ATAC	chr1:174669994-174669995	Non-Epi	80.424	63.1344	0.344356	BIN67
ATAC	chr1:174815409-174815410	Non-Epi	138.9	113.385	0.290493	BIN67
ATAC	chr1:174999424-174999425	Non-Epi	4856.3	4275.34	0.18378	BIN67
ATAC	chr1:175000014-175000015	Non-Epi	5322.59	4723.74	0.172163	BIN67
ATAC	chr1:175129195-175129196	Non-Epi	308.726	157.024	0.970852	BIN67
ATAC	chr1:175169584-175169585	Non-Epi	343.194	149.177	1.19656	BIN67
ATAC	chr1:175209265-175209266	Non-Epi	164.208	167.34	-0.0270946	BIN67
ATAC	chr1:175268682-175268683	Non-Epi	145.132	143.49	0.0163002	BIN67
ATAC	chr1:176207612-176207613	Non-Epi	2637.05	2415.32	0.12666	BIN67
ATAC	chr1:176241660-176241661	Non-Epi	312.881	105.278	1.56237	BIN67
ATAC	chr1:176866149-176866150	Non-Epi	300.055	130.98	1.1897	BIN67
ATAC	chr1:17765921-17765922	Non-Epi	163.124	83.7026	0.954312	BIN67
ATAC	chr1:17768848-17768849	Non-Epi	185.814	122.76	0.59406	BIN67
ATAC	chr1:178093571-178093572	Non-Epi	1839.64	1657.79	0.150074	BIN67
ATAC	chr1:178126908-178126909	Non-Epi	436.407	241.588	0.850472	BIN67
ATAC	chr1:178127020-178127021	Non-Epi	403.927	226.153	0.833996	BIN67
ATAC	chr1:178134162-178134163	Non-Epi	221.473	187.746	0.237187	BIN67
ATAC	chr1:178238956-178238957	Non-Epi	442.694	194.96	1.17901	BIN67
ATAC	chr1:178241163-178241164	Non-Epi	98.7598	80.0959	0.29883	BIN67
ATAC	chr1:178267753-178267754	Non-Epi	161.896	70.2829	1.19232	BIN67
ATAC	chr1:178341569-178341570	Non-Epi	407.775	274.698	0.568217	BIN67
ATAC	chr1:178341698-178341699	Non-Epi	408.371	284.771	0.518549	BIN67
ATAC	chr1:178344751-178344752	Non-Epi	479.004	321.261	0.574817	BIN67
ATAC	chr1:178354893-178354894	Non-Epi	115.777	118.048	-0.0277902	BIN67
ATAC	chr1:178397775-178397776	Non-Epi	105.679	77.9026	0.435127	BIN67
ATAC	chr1:178418083-178418084	Non-Epi	207.997	84.2062	1.29445	BIN67
ATAC	chr1:178465237-178465238	Non-Epi	80.8216	54.3288	0.564452	BIN67
ATAC	chr1:178530124-178530125	Non-Epi	379.431	135.919	1.47431	BIN67
ATAC	chr1:178537110-178537111	Non-Epi	473.657	204.383	1.20857	BIN67
ATAC	chr1:178543017-178543018	Non-Epi	1141.62	1134.88	0.0085366	BIN67
ATAC	chr1:178633236-178633237	Non-Epi	163.377	103.719	0.650494	BIN67
ATAC	chr1:178684881-178684882	Non-Epi	142.296	137.008	0.0542462	BIN67
ATAC	chr1:178685017-178685018	Non-Epi	153.442	134.262	0.191305	BIN67
ATAC	chr1:178725129-178725130	Non-Epi	1337.64	1308.23	0.0320502	BIN67
ATAC	chr1:178847598-178847599	Non-Epi	123.635	86.2371	0.514695	BIN67
ATAC	chr1:179059166-179059167	Non-Epi	226.459	139.461	0.695439	BIN67
ATAC	chr1:179129312-179129313	Non-Epi	175.553	87.1144	1.00265	BIN67
ATAC	chr1:179130203-179130204	Non-Epi	334.053	261.132	0.354094	BIN67
ATAC	chr1:179294857-179294858	Non-Epi	343.284	252.083	0.443989	BIN67
ATAC	chr1:179310718-179310719	Non-Epi	139.604	101.509	0.45589	BIN67
ATAC	chr1:179353928-179353929	Non-Epi	110.014	55.3035	0.979446	BIN67
ATAC	chr1:179365753-179365754	Non-Epi	804.241	878.082	-0.126577	BIN67
ATAC	chr1:179876308-179876309	Non-Epi	91.9856	123.149	-0.417	BIN67
ATAC	chr1:179882619-179882620	Non-Epi	4141.88	3739.46	0.147419	BIN67
ATAC	chr1:179882855-179882856	Non-Epi	3265.47	2977.93	0.132939	BIN67
ATAC	chr1:180080561-180080562	Non-Epi	100.06	116.537	-0.217897	BIN67
ATAC	chr1:180117841-180117842	Non-Epi	227.074	140.875	0.684883	BIN67
ATAC	chr1:180155525-180155526	Non-Epi	466.16	441.177	0.0792916	BIN67
ATAC	chr1:180156822-180156823	Non-Epi	233.143	181.15	0.362264	BIN67
ATAC	chr1:180168292-180168293	Non-Epi	318.228	197.202	0.687619	BIN67
ATAC	chr1:180229755-180229756	Non-Epi	2032.64	1892.33	0.103142	BIN67
ATAC	chr1:180300446-180300447	Non-Epi	47.0044	60.145	-0.34907	BIN67
ATAC	chr1:180502598-180502599	Non-Epi	1596.7	1528.84	0.0626183	BIN67
ATAC	chr1:180560356-180560357	Non-Epi	160.812	161.589	-0.00691003	BIN67
ATAC	chr1:180561101-180561102	Non-Epi	194.214	192.994	0.00904471	BIN67
ATAC	chr1:180563152-180563153	Non-Epi	228.013	156	0.544663	BIN67
ATAC	chr1:180572214-180572215	Non-Epi	256.7	227.453	0.173793	BIN67
ATAC	chr1:180586802-180586803	Non-Epi	262.228	158.73	0.720679	BIN67
ATAC	chr1:180594905-180594906	Non-Epi	219.035	115.838	0.913216	BIN67
ATAC	chr1:180773645-180773646	Non-Epi	120.311	88.138	0.444598	BIN67
ATAC	chr1:180881440-180881441	Non-Epi	181.55	146.22	0.310325	BIN67
ATAC	chr1:181105833-181105834	Non-Epi	854.733	826.678	0.0480908	BIN67
ATAC	chr1:181112799-181112800	Non-Epi	373.018	174.002	1.09574	BIN67
ATAC	chr1:181113017-181113018	Non-Epi	375.222	171.629	1.12391	BIN67
ATAC	chr1:181135680-181135681	Non-Epi	246.041	186.674	0.396526	BIN67
ATAC	chr1:18116377-18116378	Non-Epi	79.9363	110.445	-0.461466	BIN67
ATAC	chr1:181251261-181251262	Non-Epi	200.771	87.4231	1.19023	BIN67
ATAC	chr1:181255672-181255673	Non-Epi	278.775	144.887	0.93941	BIN67
ATAC	chr1:181426389-181426390	Non-Epi	254.189	204.367	0.313363	BIN67
ATAC	chr1:18182804-18182805	Non-Epi	129.199	103.166	0.32183	BIN67
ATAC	chr1:181937353-181937354	Non-Epi	387.145	377.345	0.0368944	BIN67
ATAC	chr1:182029875-182029876	Non-Epi	1906.55	2002.32	-0.0706694	BIN67
ATAC	chr1:182290508-182290509	Non-Epi	185.489	119.38	0.631489	BIN67
ATAC	chr1:182507877-182507878	Non-Epi	210.815	90.445	1.21183	BIN67
ATAC	chr1:182536588-182536589	Non-Epi	135.052	131.468	0.0385162	BIN67
ATAC	chr1:182683732-182683733	Non-Epi	162.366	123.507	0.391879	BIN67
ATAC	chr1:182779707-182779708	Non-Epi	220.01	158.99	0.466135	BIN67
ATAC	chr1:182789715-182789716	Non-Epi	1084.24	1128.82	-0.0580686	BIN67
ATAC	chr1:182956378-182956379	Non-Epi	267.177	159.769	0.738194	BIN67
ATAC	chr1:182962992-182962993	Non-Epi	531.97	584.716	-0.136148	BIN67
ATAC	chr1:182968468-182968469	Non-Epi	344.314	300.01	0.198094	BIN67
ATAC	chr1:182972249-182972250	Non-Epi	393.648	412.242	-0.0664201	BIN67
ATAC	chr1:182974922-182974923	Non-Epi	1081.06	960.014	0.171158	BIN67
ATAC	chr1:182977649-182977650	Non-Epi	244.922	288.524	-0.235485	BIN67
ATAC	chr1:182978176-182978177	Non-Epi	237.551	252.635	-0.0884569	BIN67
ATAC	chr1:183022268-183022269	Non-Epi	1230.06	1137.95	0.112204	BIN67
ATAC	chr1:183029792-183029793	Non-Epi	527.96	416.012	0.34307	BIN67
ATAC	chr1:183029966-183029967	Non-Epi	541.472	410.228	0.399611	BIN67
ATAC	chr1:183030089-183030090	Non-Epi	502.633	355.184	0.499749	BIN67
ATAC	chr1:183032209-183032210	Non-Epi	290.354	258.192	0.168756	BIN67
ATAC	chr1:183032564-183032565	Non-Epi	311.833	272.749	0.192542	BIN67
ATAC	chr1:183044618-183044619	Non-Epi	401.434	331.724	0.274428	BIN67
ATAC	chr1:183060617-183060618	Non-Epi	469.665	301.928	0.635727	BIN67
ATAC	chr1:183065398-183065399	Non-Epi	225.592	236.031	-0.0649785	BIN67
ATAC	chr1:183085249-183085250	Non-Epi	309.756	209.988	0.558621	BIN67
ATAC	chr1:183135612-183135613	Non-Epi	119.625	117.496	0.0256901	BIN67
ATAC	chr1:183143964-183143965	Non-Epi	73.4511	97.8697	-0.409236	BIN67
ATAC	chr1:183164475-183164476	Non-Epi	239.809	174.57	0.455843	BIN67
ATAC	chr1:183164563-183164564	Non-Epi	229.639	167.194	0.455508	BIN67
ATAC	chr1:183180592-183180593	Non-Epi	205.288	174.294	0.234881	BIN67
ATAC	chr1:183209736-183209737	Non-Epi	193.293	145.44	0.407922	BIN67
ATAC	chr1:183214925-183214926	Non-Epi	184.893	176.52	0.06649	BIN67
ATAC	chr1:183234634-183234635	Non-Epi	276.932	146.35	0.915489	BIN67
ATAC	chr1:183234802-183234803	Non-Epi	270.284	166.756	0.693446	BIN67
ATAC	chr1:183272813-183272814	Non-Epi	398.092	181.182	1.13134	BIN67
ATAC	chr1:183279223-183279224	Non-Epi	353.87	187.437	0.913205	BIN67
ATAC	chr1:183281757-183281758	Non-Epi	557.243	437.473	0.348403	BIN67
ATAC	chr1:183291955-183291956	Non-Epi	153.821	111.371	0.462337	BIN67
ATAC	chr1:183360040-183360041	Non-Epi	145.24	128.998	0.169851	BIN67
ATAC	chr1:183432717-183432718	Non-Epi	215.566	152.718	0.49452	BIN67
ATAC	chr1:183454491-183454492	Non-Epi	206.028	144.871	0.505132	BIN67
ATAC	chr1:183467670-183467671	Non-Epi	254.351	156.78	0.694569	BIN67
ATAC	chr1:183470340-183470341	Non-Epi	651.956	617.86	0.0773724	BIN67
ATAC	chr1:183472256-183472257	Non-Epi	3870.48	3741.41	0.0489173	BIN67
ATAC	chr1:183515406-183515407	Non-Epi	218.872	149.534	0.546574	BIN67
ATAC	chr1:183567892-183567893	Non-Epi	270.682	229.792	0.235322	BIN67
ATAC	chr1:18360453-18360454	Non-Epi	98.2179	51.3068	0.923601	BIN67
ATAC	chr1:183608525-183608526	Non-Epi	210.364	150.931	0.476309	BIN67
ATAC	chr1:183610100-183610101	Non-Epi	255.074	183.75	0.47099	BIN67
ATAC	chr1:183622942-183622943	Non-Epi	418.162	339.717	0.298934	BIN67
ATAC	chr1:183636113-183636114	Non-Epi	3098.84	2978.82	0.0569681	BIN67
ATAC	chr1:183757108-183757109	Non-Epi	148.058	101.379	0.541959	BIN67
ATAC	chr1:183805282-183805283	Non-Epi	316.711	387.612	-0.290618	BIN67
ATAC	chr1:183808407-183808408	Non-Epi	140.507	120.501	0.219907	BIN67
ATAC	chr1:183871169-183871170	Non-Epi	260.818	132.491	0.971822	BIN67
ATAC	chr1:183881965-183881966	Non-Epi	257.784	135.984	0.917736	BIN67
ATAC	chr1:184002252-184002253	Non-Epi	225.303	138.649	0.696456	BIN67
ATAC	chr1:184491818-184491819	Non-Epi	190.691	155.578	0.291905	BIN67
ATAC	chr1:18480685-18480686	Non-Epi	284.519	147.682	0.941359	BIN67
ATAC	chr1:185017288-185017289	Non-Epi	203.698	127.211	0.674974	BIN67
ATAC	chr1:185045315-185045316	Non-Epi	1270.67	1324.83	-0.0601699	BIN67
ATAC	chr1:185144539-185144540	Non-Epi	155.465	99.0232	0.645505	BIN67
ATAC	chr1:185317760-185317761	Non-Epi	1919.92	1712.4	0.164938	BIN67
ATAC	chr1:185483855-185483856	Non-Epi	411.153	237.039	0.791985	BIN67
ATAC	chr1:185484072-185484073	Non-Epi	470.405	265.145	0.824755	BIN67
ATAC	chr1:185484252-185484253	Non-Epi	458.338	268.362	0.77001	BIN67
ATAC	chr1:185484367-185484368	Non-Epi	440.147	275.234	0.675367	BIN67
ATAC	chr1:185500324-185500325	Non-Epi	326.827	181.377	0.846007	BIN67
ATAC	chr1:185646502-185646503	Non-Epi	380.66	224.658	0.758146	BIN67
ATAC	chr1:185654730-185654731	Non-Epi	137.834	137.934	-0.00104015	BIN67
ATAC	chr1:1859258-1859259	Non-Epi	177.576	130.071	0.446197	BIN67
ATAC	chr1:18618510-18618511	Non-Epi	123.382	87.0819	0.497861	BIN67
ATAC	chr1:186188281-186188282	Non-Epi	305.98	204.431	0.579489	BIN67
ATAC	chr1:186237071-186237072	Non-Epi	304.264	121.184	1.32101	BIN67
ATAC	chr1:186535857-186535858	Non-Epi	145.114	111.452	0.377787	BIN67
ATAC	chr1:186708929-186708930	Non-Epi	103.258	71.9888	0.514412	BIN67
ATAC	chr1:187313531-187313532	Non-Epi	140.67	143.23	-0.0258395	BIN67
ATAC	chr1:187471766-187471767	Non-Epi	188.162	96.9598	0.949361	BIN67
ATAC	chr1:187472178-187472179	Non-Epi	183.212	99.9492	0.86774	BIN67
ATAC	chr1:187691481-187691482	Non-Epi	306.053	189.696	0.687213	BIN67
ATAC	chr1:188027791-188027792	Non-Epi	395.365	127.764	1.6221	BIN67
ATAC	chr1:188238043-188238044	Non-Epi	203.788	131.143	0.632035	BIN67
ATAC	chr1:18902667-18902668	Non-Epi	1243.03	1124.74	0.144153	BIN67
ATAC	chr1:189323177-189323178	Non-Epi	73.8486	56.4896	0.380676	BIN67
ATAC	chr1:189617013-189617014	Non-Epi	164.985	112.67	0.546198	BIN67
ATAC	chr1:189619762-189619763	Non-Epi	197.231	99.1369	0.985206	BIN67
ATAC	chr1:18965962-18965963	Non-Epi	212.261	180.728	0.230839	BIN67
ATAC	chr1:189752511-189752512	Non-Epi	104.974	99.7543	0.0728703	BIN67
ATAC	chr1:189962513-189962514	Non-Epi	184.08	125.895	0.544508	BIN67
ATAC	chr1:190679392-190679393	Non-Epi	83.459	77.139	0.112209	BIN67
ATAC	chr1:191919375-191919376	Non-Epi	88.4268	98.0484	-0.147427	BIN67
ATAC	chr1:19251656-19251657	Non-Epi	733.717	668.679	0.133719	BIN67
ATAC	chr1:192531030-192531031	Non-Epi	208.106	122.824	0.755935	BIN67
ATAC	chr1:192766400-192766401	Non-Epi	364.366	167.99	1.1124	BIN67
ATAC	chr1:193059888-193059889	Non-Epi	2973.34	2618.05	0.183529	BIN67
ATAC	chr1:193105156-193105157	Non-Epi	1934.66	1846.17	0.0675081	BIN67
ATAC	chr1:193115773-193115774	Non-Epi	361.475	130.834	1.45916	BIN67
ATAC	chr1:193115960-193115961	Non-Epi	356.598	134.847	1.39635	BIN67
ATAC	chr1:193121845-193121846	Non-Epi	2738.61	2573.55	0.0896517	BIN67
ATAC	chr1:193167449-193167450	Non-Epi	127.754	153.807	-0.265856	BIN67
ATAC	chr1:193183427-193183428	Non-Epi	584.448	615.894	-0.0754809	BIN67
ATAC	chr1:193201906-193201907	Non-Epi	247.162	287.988	-0.21973	BIN67
ATAC	chr1:193209936-193209937	Non-Epi	214.139	238.793	-0.15652	BIN67
ATAC	chr1:193211817-193211818	Non-Epi	421.54	328.93	0.356931	BIN67
ATAC	chr1:193322237-193322238	Non-Epi	160.559	109.161	0.55245	BIN67
ATAC	chr1:193348588-193348589	Non-Epi	756.912	706.534	0.0992312	BIN67
ATAC	chr1:193403201-193403202	Non-Epi	726.328	558.04	0.379657	BIN67
ATAC	chr1:193404068-193404069	Non-Epi	1471.16	1461.71	0.00928618	BIN67
ATAC	chr1:193404505-193404506	Non-Epi	2245.63	2073.8	0.114787	BIN67
ATAC	chr1:193418753-193418754	Non-Epi	413.068	316.907	0.381263	BIN67
ATAC	chr1:193543262-193543263	Non-Epi	608.528	575.586	0.0801571	BIN67
ATAC	chr1:193543536-193543537	Non-Epi	548.011	490.356	0.160067	BIN67
ATAC	chr1:193558682-193558683	Non-Epi	1414.94	1251.67	0.176747	BIN67
ATAC	chr1:193562104-193562105	Non-Epi	323.973	254.52	0.346884	BIN67
ATAC	chr1:193588828-193588829	Non-Epi	465.817	576.593	-0.307197	BIN67
ATAC	chr1:193629736-193629737	Non-Epi	729.634	723.463	0.0122374	BIN67
ATAC	chr1:193629962-193629963	Non-Epi	742.568	729.182	0.0262101	BIN67
ATAC	chr1:193701461-193701462	Non-Epi	102.373	133.775	-0.382694	BIN67
ATAC	chr1:194013936-194013937	Non-Epi	114.639	90.4612	0.338392	BIN67
ATAC	chr1:194014231-194014232	Non-Epi	116.554	83.5564	0.475332	BIN67
ATAC	chr1:194044739-194044740	Non-Epi	192.733	173.66	0.149515	BIN67
ATAC	chr1:194045509-194045510	Non-Epi	169.375	109.844	0.620188	BIN67
ATAC	chr1:194366913-194366914	Non-Epi	239.321	156.634	0.608389	BIN67
ATAC	chr1:194975997-194975998	Non-Epi	120.672	87.0819	0.466084	BIN67
ATAC	chr1:195592305-195592306	Non-Epi	106.672	119.981	-0.168138	BIN67
ATAC	chr1:195664027-195664028	Non-Epi	182.165	127.114	0.515717	BIN67
ATAC	chr1:195981740-195981741	Non-Epi	180.467	159.542	0.176754	BIN67
ATAC	chr1:196078765-196078766	Non-Epi	99.9883	73.0286	0.448033	BIN67
ATAC	chr1:19622233-19622234	Non-Epi	90.0887	97.6585	-0.115171	BIN67
ATAC	chr1:19622502-19622503	Non-Epi	80.3157	74.9945	0.0976398	BIN67
ATAC	chr1:197034968-197034969	Non-Epi	195.424	73.4998	1.39866	BIN67
ATAC	chr1:197179196-197179197	Non-Epi	339.111	197.527	0.776672	BIN67
ATAC	chr1:197210629-197210630	Non-Epi	175.228	90.9811	0.938032	BIN67
ATAC	chr1:197312139-197312140	Non-Epi	226.785	106.789	1.07946	BIN67
ATAC	chr1:19758490-19758491	Non-Epi	157.705	102.354	0.618757	BIN67
ATAC	chr1:197696347-197696348	Non-Epi	65.4665	81.2494	-0.307377	BIN67
ATAC	chr1:198018627-198018628	Non-Epi	590.716	133.027	2.14238	BIN67
ATAC	chr1:198018734-198018735	Non-Epi	611.78	138.096	2.13928	BIN67
ATAC	chr1:198019114-198019115	Non-Epi	610.66	152.816	1.99153	BIN67
ATAC	chr1:198121442-198121443	Non-Epi	317.722	158.437	0.999312	BIN67
ATAC	chr1:198156149-198156150	Non-Epi	567.973	556.561	0.0292305	BIN67
ATAC	chr1:198220644-198220645	Non-Epi	316.602	123.604	1.34987	BIN67
ATAC	chr1:19925507-19925508	Non-Epi	115.506	81.6881	0.494651	BIN67
ATAC	chr1:19949522-19949523	Non-Epi	121.431	65.7989	0.874074	BIN67
ATAC	chr1:199685597-199685598	Non-Epi	298.79	164.465	0.857431	BIN67
ATAC	chr1:199759437-199759438	Non-Epi	193.094	191.093	0.0149497	BIN67
ATAC	chr1:199994239-199994240	Non-Epi	138.502	155.042	-0.161642	BIN67
ATAC	chr1:200150873-200150874	Non-Epi	199.615	157.544	0.339551	BIN67
ATAC	chr1:200321080-200321081	Non-Epi	110.375	112.427	-0.0263299	BIN67
ATAC	chr1:200410061-200410062	Non-Epi	1187.45	1140.09	0.0586646	BIN67
ATAC	chr1:200483757-200483758	Non-Epi	391.065	179.233	1.12123	BIN67
ATAC	chr1:200733962-200733963	Non-Epi	321.986	200.159	0.683136	BIN67
ATAC	chr1:200891054-200891055	Non-Epi	466.395	542.118	-0.216623	BIN67
ATAC	chr1:201063563-201063564	Non-Epi	126.706	115.757	0.129313	BIN67
ATAC	chr1:201137685-201137686	Non-Epi	163.215	127.536	0.353413	BIN67
ATAC	chr1:201170116-201170117	Non-Epi	478.859	392.129	0.287609	BIN67
ATAC	chr1:201170695-201170696	Non-Epi	1962.1	1698.99	0.207605	BIN67
ATAC	chr1:201171254-201171255	Non-Epi	1823.2	1625.93	0.165111	BIN67
ATAC	chr1:201267347-201267348	Non-Epi	215.747	194.619	0.147969	BIN67
ATAC	chr1:201289923-201289924	Non-Epi	202.054	123.962	0.700376	BIN67
ATAC	chr1:201296104-201296105	Non-Epi	183.321	170.232	0.106265	BIN67
ATAC	chr1:201456926-201456927	Non-Epi	344.169	171.727	0.998811	BIN67
ATAC	chr1:201461215-201461216	Non-Epi	540.767	299.669	0.849496	BIN67
ATAC	chr1:201462033-201462034	Non-Epi	506.137	314.405	0.685171	BIN67
ATAC	chr1:201463255-201463256	Non-Epi	580.329	490.892	0.241014	BIN67
ATAC	chr1:201489389-201489390	Non-Epi	216.759	105.018	1.03842	BIN67
ATAC	chr1:201562787-201562788	Non-Epi	247.975	192.799	0.361439	BIN67
ATAC	chr1:201593560-201593561	Non-Epi	174.325	119.25	0.543988	BIN67
ATAC	chr1:201713675-201713676	Non-Epi	171.344	102.354	0.7377	BIN67
ATAC	chr1:201714846-201714847	Non-Epi	271.368	134.165	1.01084	BIN67
ATAC	chr1:201715065-201715066	Non-Epi	275.216	119.332	1.19878	BIN67
ATAC	chr1:201802506-201802507	Non-Epi	61.5645	39.8367	0.615477	BIN67
ATAC	chr1:201845680-201845681	Non-Epi	182.634	135.984	0.422825	BIN67
ATAC	chr1:201850036-201850037	Non-Epi	291.745	188.461	0.627745	BIN67
ATAC	chr1:201882986-201882987	Non-Epi	165.328	143.035	0.207612	BIN67
ATAC	chr1:201885879-201885880	Non-Epi	313.26	222.92	0.488975	BIN67
ATAC	chr1:201982425-201982426	Non-Epi	841.816	774.315	0.120436	BIN67
ATAC	chr1:201983166-201983167	Non-Epi	936.909	874.914	0.0986586	BIN67
ATAC	chr1:202047060-202047061	Non-Epi	253.087	168.64	0.582845	BIN67
ATAC	chr1:202058323-202058324	Non-Epi	190.763	138.356	0.46055	BIN67
ATAC	chr1:202105490-202105491	Non-Epi	250.196	149.144	0.742467	BIN67
ATAC	chr1:202105834-202105835	Non-Epi	261.794	164.221	0.669534	BIN67
ATAC	chr1:20211635-20211636	Non-Epi	227.525	137.528	0.722178	BIN67
ATAC	chr1:202185192-202185193	Non-Epi	319.384	300.14	0.0893675	BIN67
ATAC	chr1:202200410-202200411	Non-Epi	149.034	182.937	-0.293923	BIN67
ATAC	chr1:202234465-202234466	Non-Epi	255.525	208.688	0.290857	BIN67
ATAC	chr1:202235974-202235975	Non-Epi	331.957	173.644	0.93092	BIN67
ATAC	chr1:202292192-202292193	Non-Epi	246.728	147	0.743164	BIN67
ATAC	chr1:202292541-202292542	Non-Epi	244.958	154.311	0.663253	BIN67
ATAC	chr1:202342110-202342111	Non-Epi	1865.72	1773	0.0735063	BIN67
ATAC	chr1:202456704-202456705	Non-Epi	67.6704	66.6762	0.0210408	BIN67
ATAC	chr1:202466454-202466455	Non-Epi	106.184	70.8029	0.577981	BIN67
ATAC	chr1:202586607-202586608	Non-Epi	170.784	103.686	0.714526	BIN67
ATAC	chr1:202589216-202589217	Non-Epi	355.297	157.105	1.1722	BIN67
ATAC	chr1:20263087-20263088	Non-Epi	138.322	98.3571	0.487723	BIN67
ATAC	chr1:202680606-202680607	Non-Epi	78.69	122.565	-0.632796	BIN67
ATAC	chr1:202888979-202888980	Non-Epi	2576.39	2391.54	0.10737	BIN67
ATAC	chr1:202958565-202958566	Non-Epi	1107.73	1051	0.0757787	BIN67
ATAC	chr1:202959365-202959366	Non-Epi	330.584	251.66	0.392176	BIN67
ATAC	chr1:202964673-202964674	Non-Epi	314.706	238.793	0.396789	BIN67
ATAC	chr1:203006955-203006956	Non-Epi	1401.37	1263.91	0.148835	BIN67
ATAC	chr1:20302135-20302136	Non-Epi	175.499	136.472	0.360524	BIN67
ATAC	chr1:203152782-203152783	Non-Epi	165.906	156.39	0.0846948	BIN67
ATAC	chr1:203177684-203177685	Non-Epi	195.677	181.345	0.109158	BIN67
ATAC	chr1:203197813-203197814	Non-Epi	144.644	132.767	0.122721	BIN67
ATAC	chr1:203305171-203305172	Non-Epi	2420.4	2048.77	0.240383	BIN67
ATAC	chr1:203327900-203327901	Non-Epi	1032.4	1112.08	-0.107164	BIN67
ATAC	chr1:203328972-203328973	Non-Epi	375.529	385.533	-0.0378282	BIN67
ATAC	chr1:203329516-203329517	Non-Epi	371.772	352.422	0.0769011	BIN67
ATAC	chr1:203354322-203354323	Non-Epi	143.036	134.782	0.0851417	BIN67
ATAC	chr1:203512903-203512904	Non-Epi	231.517	170.573	0.438513	BIN67
ATAC	chr1:203520593-203520594	Non-Epi	173.476	191.678	-0.143166	BIN67
ATAC	chr1:203534728-203534729	Non-Epi	147.264	129.421	0.184993	BIN67
ATAC	chr1:203557732-203557733	Non-Epi	204.529	164.448	0.31296	BIN67
ATAC	chr1:203558418-203558419	Non-Epi	329.248	161.329	1.02463	BIN67
ATAC	chr1:203558561-203558562	Non-Epi	313.549	153.856	1.02236	BIN67
ATAC	chr1:203558736-203558737	Non-Epi	319.854	168.12	0.923868	BIN67
ATAC	chr1:203559620-203559621	Non-Epi	150.118	114.214	0.39136	BIN67
ATAC	chr1:203607528-203607529	Non-Epi	179.094	145.7	0.295881	BIN67
ATAC	chr1:203628240-203628241	Non-Epi	1024.45	924.271	0.148309	BIN67
ATAC	chr1:203663686-203663687	Non-Epi	322.78	186.706	0.786538	BIN67
ATAC	chr1:203669944-203669945	Non-Epi	179.058	152.946	0.226035	BIN67
ATAC	chr1:203674435-203674436	Non-Epi	202.506	127.942	0.658343	BIN67
ATAC	chr1:203693223-203693224	Non-Epi	546.964	189.241	1.52625	BIN67
ATAC	chr1:203795517-203795518	Non-Epi	1103.9	961.834	0.198556	BIN67
ATAC	chr1:203795760-203795761	Non-Epi	1247.73	1111.76	0.166323	BIN67
ATAC	chr1:20380818-20380819	Non-Epi	126.959	140.501	-0.14513	BIN67
ATAC	chr1:203858275-203858276	Non-Epi	169.899	139.64	0.281137	BIN67
ATAC	chr1:203907160-203907161	Non-Epi	160.957	130.46	0.300979	BIN67
ATAC	chr1:204057385-204057386	Non-Epi	140.273	126.318	0.15005	BIN67
ATAC	chr1:204057701-204057702	Non-Epi	145.638	114.49	0.344489	BIN67
ATAC	chr1:204102999-204103000	Non-Epi	163.432	102.662	0.665594	BIN67
ATAC	chr1:20411465-20411466	Non-Epi	214.97	104.71	1.03073	BIN67
ATAC	chr1:204319550-204319551	Non-Epi	202.325	164.416	0.297689	BIN67
ATAC	chr1:204417377-204417378	Non-Epi	269.273	149.047	0.849006	BIN67
ATAC	chr1:204417617-204417618	Non-Epi	275.921	185.537	0.570014	BIN67
ATAC	chr1:204419093-204419094	Non-Epi	199.76	188.802	0.0809738	BIN67
ATAC	chr1:204422893-204422894	Non-Epi	88.1196	97.691	-0.147175	BIN67
ATAC	chr1:204426145-204426146	Non-Epi	118.414	123.231	-0.0570456	BIN67
ATAC	chr1:204621736-204621737	Non-Epi	224.545	181.8	0.303148	BIN67
ATAC	chr1:204647470-204647471	Non-Epi	115.253	111.127	0.0521341	BIN67
ATAC	chr1:204828376-204828377	Non-Epi	311.111	373.38	-0.262446	BIN67
ATAC	chr1:20494961-20494962	Non-Epi	312.935	187.324	0.737251	BIN67
ATAC	chr1:205147352-205147353	Non-Epi	152.249	116.261	0.38616	BIN67
ATAC	chr1:205172888-205172889	Non-Epi	122.19	85.8472	0.504332	BIN67
ATAC	chr1:205175718-205175719	Non-Epi	109.544	84.645	0.368186	BIN67
ATAC	chr1:2051949-2051950	Non-Epi	278.684	267.988	0.0562561	BIN67
ATAC	chr1:205226985-205226986	Non-Epi	357.411	231.271	0.625804	BIN67
ATAC	chr1:205227480-205227481	Non-Epi	883.365	835.565	0.080165	BIN67
ATAC	chr1:205317710-205317711	Non-Epi	266.274	235.089	0.17899	BIN67
ATAC	chr1:205355074-205355075	Non-Epi	258.506	306.347	-0.244098	BIN67
ATAC	chr1:205374746-205374747	Non-Epi	264.142	186.901	0.496793	BIN67
ATAC	chr1:205500353-205500354	Non-Epi	238.382	157.836	0.591777	BIN67
ATAC	chr1:205610169-205610170	Non-Epi	125.044	116.553	0.100614	BIN67
ATAC	chr1:205748716-205748717	Non-Epi	782.781	748.255	0.0649931	BIN67
ATAC	chr1:205749114-205749115	Non-Epi	2396.94	2288.31	0.0668824	BIN67
ATAC	chr1:205750296-205750297	Non-Epi	2163.32	1895.76	0.190382	BIN67
ATAC	chr1:205775798-205775799	Non-Epi	535.005	565.87	-0.0807721	BIN67
ATAC	chr1:205784069-205784070	Non-Epi	315.175	153.385	1.0342	BIN67
ATAC	chr1:20587590-20587591	Non-Epi	115.976	100.892	0.199172	BIN67
ATAC	chr1:205933901-205933902	Non-Epi	201.404	129.892	0.62886	BIN67
ATAC	chr1:206001666-206001667	Non-Epi	225.592	165.098	0.448061	BIN67
ATAC	chr1:20604521-20604522	Non-Epi	118.739	95.8551	0.305999	BIN67
ATAC	chr1:206105678-206105679	Non-Epi	185.669	182.97	0.0210173	BIN67
ATAC	chr1:206106495-206106496	Non-Epi	266.093	242.725	0.132091	BIN67
ATAC	chr1:20613979-20613980	Non-Epi	240.568	127.682	0.908615	BIN67
ATAC	chr1:20614133-20614134	Non-Epi	232.421	118.909	0.960992	BIN67
ATAC	chr1:206358293-206358294	Non-Epi	20.5938	17.7576	0.203142	BIN67
ATAC	chr1:206359077-206359078	Non-Epi	10.062	1.46219	2.1676	BIN67
ATAC	chr1:206501512-206501513	Non-Epi	243.838	119.998	1.01685	BIN67
ATAC	chr1:206513809-206513810	Non-Epi	228.23	137.999	0.721721	BIN67
ATAC	chr1:206589286-206589287	Non-Epi	157.958	120.68	0.385553	BIN67
ATAC	chr1:206898809-206898810	Non-Epi	133.245	136.975	-0.0395376	BIN67
ATAC	chr1:207007517-207007518	High-Epi	371.627	176.731	1.06804	BIN67
ATAC	chr1:207021529-207021530	High-Epi	207.546	167.877	0.304394	BIN67
ATAC	chr1:207040165-207040166	Non-Epi	288.042	176.926	0.700003	BIN67
ATAC	chr1:207050866-207050867	Non-Epi	1102.6	1008.79	0.128165	BIN67
ATAC	chr1:207051508-207051509	Non-Epi	1204.3	826.629	0.542339	BIN67
ATAC	chr1:207205766-207205767	Non-Epi	137.039	86.1396	0.663675	BIN67
ATAC	chr1:207304939-207304940	Non-Epi	194.593	119.397	0.700061	BIN67
ATAC	chr1:20733131-20733132	Non-Epi	332.951	298.435	0.157395	BIN67
ATAC	chr1:20733423-20733424	Non-Epi	317.668	286.12	0.150403	BIN67
ATAC	chr1:207393591-207393592	Non-Epi	250.485	109.161	1.19086	BIN67
ATAC	chr1:207404941-207404942	Non-Epi	243.079	276.242	-0.183796	BIN67
ATAC	chr1:207707494-207707495	Non-Epi	182.851	94.263	0.948551	BIN67
ATAC	chr1:207848373-207848374	Non-Epi	211.701	102.191	1.0435	BIN67
ATAC	chr1:20785822-20785823	Non-Epi	346.373	341.797	0.0191321	BIN67
ATAC	chr1:207890635-207890636	Non-Epi	305.836	174.001	0.8101	BIN67
ATAC	chr1:207944541-207944542	Non-Epi	149.07	76.0504	0.961761	BIN67
ATAC	chr1:207944694-207944695	Non-Epi	145.782	74.9294	0.950947	BIN67
ATAC	chr1:207963610-207963611	Non-Epi	789.79	782.926	0.0125766	BIN67
ATAC	chr1:208008076-208008077	Non-Epi	230.072	145.797	0.654519	BIN67
ATAC	chr1:208107855-208107856	Non-Epi	353.436	153.774	1.19536	BIN67
ATAC	chr1:208108038-208108039	Non-Epi	375.927	165.163	1.18168	BIN67
ATAC	chr1:208108187-208108188	Non-Epi	357.392	169.339	1.07313	BIN67
ATAC	chr1:208154632-208154633	Non-Epi	133.426	140.111	-0.0700179	BIN67
ATAC	chr1:208201232-208201233	Non-Epi	300.272	123.637	1.27334	BIN67
ATAC	chr1:208201502-208201503	Non-Epi	294.347	112.459	1.38024	BIN67
ATAC	chr1:208203360-208203361	Non-Epi	336.907	184.399	0.86599	BIN67
ATAC	chr1:208221253-208221254	Non-Epi	244.94	136.91	0.834573	BIN67
ATAC	chr1:20848258-20848259	Non-Epi	114.928	89.9089	0.350733	BIN67
ATAC	chr1:20896887-20896888	Non-Epi	112.507	92.1184	0.285644	BIN67
ATAC	chr1:209607732-209607733	Non-Epi	359.271	237.104	0.597494	BIN67
ATAC	chr1:209649203-209649204	High-Epi	176.763	142.012	0.313823	BIN67
ATAC	chr1:209651267-209651268	High-Epi	294.889	181.069	0.70057	BIN67
ATAC	chr1:209652787-209652788	High-Epi	365.702	134.506	1.43625	BIN67
ATAC	chr1:209653212-209653213	High-Epi	282.424	132.865	1.08218	BIN67
ATAC	chr1:209747968-209747969	Non-Epi	925.889	1006.9	-0.120887	BIN67
ATAC	chr1:209790403-209790404	High-Epi	298.7	191.044	0.642081	BIN67
ATAC	chr1:209790853-209790854	High-Epi	300.633	174.976	0.777414	BIN67
ATAC	chr1:209808234-209808235	High-Epi	336.69	104.726	1.67537	BIN67
ATAC	chr1:209810185-209810186	High-Epi	146.505	129.486	0.176871	BIN67
ATAC	chr1:209823604-209823605	Non-Epi	483.267	289.158	0.738967	BIN67
ATAC	chr1:209823863-209823864	Non-Epi	448.421	219.378	1.02808	BIN67
ATAC	chr1:209826113-209826114	Non-Epi	283.255	189.972	0.573824	BIN67
ATAC	chr1:209840208-209840209	Non-Epi	354.105	169.94	1.05476	BIN67
ATAC	chr1:209873371-209873372	Non-Epi	264.991	105.879	1.3154	BIN67
ATAC	chr1:209873507-209873508	Non-Epi	277.763	107.65	1.35935	BIN67
ATAC	chr1:209884327-209884328	Non-Epi	268.767	160.907	0.736552	BIN67
ATAC	chr1:209884510-209884511	Non-Epi	438.07	174.651	1.32173	BIN67
ATAC	chr1:209884717-209884718	Non-Epi	428.875	150.915	1.50065	BIN67
ATAC	chr1:209884841-209884842	Non-Epi	410.051	140.972	1.53371	BIN67
ATAC	chr1:209926267-209926268	Non-Epi	191.594	141.005	0.439629	BIN67
ATAC	chr1:210044019-210044020	Non-Epi	66.3698	87.7317	-0.397349	BIN67
ATAC	chr1:210078815-210078816	Non-Epi	96.8269	94.4741	0.0351211	BIN67
ATAC	chr1:210124299-210124300	Non-Epi	115.036	66.6762	0.777854	BIN67
ATAC	chr1:210222185-210222186	Non-Epi	223.009	155.562	0.516827	BIN67
ATAC	chr1:21022604-21022605	Non-Epi	161.173	79.8359	1.00447	BIN67
ATAC	chr1:210374152-210374153	Non-Epi	633.783	629.687	0.00933822	BIN67
ATAC	chr1:210377085-210377086	Non-Epi	167.55	162.71	0.0420352	BIN67
ATAC	chr1:210377865-210377866	Non-Epi	141.989	132.897	0.0947717	BIN67
ATAC	chr1:210439215-210439216	Non-Epi	415.398	140.533	1.55682	BIN67
ATAC	chr1:210496256-210496257	Non-Epi	230.831	164.416	0.486975	BIN67
ATAC	chr1:210598060-210598061	Non-Epi	485.76	143.295	1.75419	BIN67
ATAC	chr1:210882738-210882739	Non-Epi	239.069	118.47	1.00679	BIN67
ATAC	chr1:21091249-21091250	Non-Epi	84.0913	61.6073	0.442681	BIN67
ATAC	chr1:211037270-211037271	Non-Epi	341.604	154.505	1.13958	BIN67
ATAC	chr1:211198125-211198126	Non-Epi	104.595	72.7036	0.51873	BIN67
ATAC	chr1:211260906-211260907	Non-Epi	1295.2	1098.3	0.237702	BIN67
ATAC	chr1:211281975-211281976	Non-Epi	184.26	157.999	0.220539	BIN67
ATAC	chr1:211305191-211305192	Non-Epi	205.685	112.313	0.867121	BIN67
ATAC	chr1:211360222-211360223	Non-Epi	140.471	96.5375	0.53648	BIN67
ATAC	chr1:211371600-211371601	Non-Epi	222.196	71.9726	1.61289	BIN67
ATAC	chr1:211470178-211470179	Non-Epi	366.172	378.871	-0.0490546	BIN67
ATAC	chr1:21149701-21149702	Non-Epi	370.544	324.478	0.190972	BIN67
ATAC	chr1:211515498-211515499	Non-Epi	563.041	484.377	0.216694	BIN67
ATAC	chr1:211579804-211579805	Non-Epi	1546.63	1471.59	0.0717056	BIN67
ATAC	chr1:211592296-211592297	Non-Epi	257.531	148.917	0.786175	BIN67
ATAC	chr1:211611022-211611023	Non-Epi	129.235	140.273	-0.117372	BIN67
ATAC	chr1:211613591-211613592	Non-Epi	214.248	121.996	0.807386	BIN67
ATAC	chr1:211614086-211614087	Non-Epi	126.85	100.957	0.326503	BIN67
ATAC	chr1:211621667-211621668	Non-Epi	157.506	148.608	0.0833535	BIN67
ATAC	chr1:211636663-211636664	Non-Epi	182.002	99.9331	0.858461	BIN67
ATAC	chr1:211639694-211639695	Non-Epi	181.623	143.133	0.341468	BIN67
ATAC	chr1:211675771-211675772	Non-Epi	1598.69	1530.81	0.0625593	BIN67
ATAC	chr1:211831014-211831015	Non-Epi	809.914	741.723	0.126724	BIN67
ATAC	chr1:211920884-211920885	Non-Epi	144.12	107.26	0.422746	BIN67
ATAC	chr1:212030736-212030737	Non-Epi	315.049	170.427	0.882551	BIN67
ATAC	chr1:212030878-212030879	Non-Epi	324.479	171.662	0.914612	BIN67
ATAC	chr1:212035054-212035055	Non-Epi	2230.63	2028.17	0.137213	BIN67
ATAC	chr1:212035303-212035304	Non-Epi	3614.25	3284.34	0.138051	BIN67
ATAC	chr1:212035414-212035415	Non-Epi	3649.36	3325.3	0.134123	BIN67
ATAC	chr1:212179866-212179867	Non-Epi	301.898	148.072	1.02282	BIN67
ATAC	chr1:212234984-212234985	Non-Epi	231.734	147	0.653091	BIN67
ATAC	chr1:212285273-212285274	Non-Epi	5056.68	4570.47	0.145816	BIN67
ATAC	chr1:212290913-212290914	Non-Epi	111.55	138.421	-0.308891	BIN67
ATAC	chr1:212484902-212484903	Non-Epi	240.225	161.914	0.566267	BIN67
ATAC	chr1:212486105-212486106	Non-Epi	481.515	173.352	1.46858	BIN67
ATAC	chr1:212513154-212513155	Non-Epi	305.33	180.728	0.753308	BIN67
ATAC	chr1:212561642-212561643	Non-Epi	211.177	145.797	0.53144	BIN67
ATAC	chr1:212567258-212567259	Non-Epi	216.235	128.576	0.745457	BIN67
ATAC	chr1:212596131-212596132	Non-Epi	331.849	117.674	1.48786	BIN67
ATAC	chr1:212608544-212608545	Non-Epi	2355.03	1736.8	0.439095	BIN67
ATAC	chr1:212671796-212671797	Non-Epi	205.432	150.639	0.445029	BIN67
ATAC	chr1:212727691-212727692	Non-Epi	124.448	119.202	0.0616317	BIN67
ATAC	chr1:212782709-212782710	Non-Epi	273.915	234.488	0.223336	BIN67
ATAC	chr1:212816829-212816830	Non-Epi	237.28	77.7726	1.59689	BIN67
ATAC	chr1:212858116-212858117	Non-Epi	2272.98	1847.24	0.299062	BIN67
ATAC	chr1:21324725-21324726	Non-Epi	239.9	133.06	0.845554	BIN67
ATAC	chr1:213771509-213771510	Non-Epi	154.742	117.804	0.390574	BIN67
ATAC	chr1:21379358-21379359	Non-Epi	142.458	59.2352	1.25195	BIN67
ATAC	chr1:214212920-214212921	Non-Epi	420.005	232.327	0.851483	BIN67
ATAC	chr1:214297160-214297161	Non-Epi	243.332	125.911	0.94502	BIN67
ATAC	chr1:214316719-214316720	Non-Epi	235.076	137.869	0.765529	BIN67
ATAC	chr1:214345762-214345763	Non-Epi	75.9079	92.5408	-0.282464	BIN67
ATAC	chr1:214404980-214404981	Non-Epi	351.72	142.645	1.29601	BIN67
ATAC	chr1:214446352-214446353	Non-Epi	142.35	116.943	0.281449	BIN67
ATAC	chr1:214446983-214446984	Non-Epi	307.714	195.886	0.648915	BIN67
ATAC	chr1:214494653-214494654	Non-Epi	281.593	183.749	0.613155	BIN67
ATAC	chr1:214525819-214525820	Non-Epi	115.939	118.292	-0.0287337	BIN67
ATAC	chr1:214551169-214551170	Non-Epi	875.218	758.686	0.205887	BIN67
ATAC	chr1:21466634-21466635	Non-Epi	56.5787	46.4004	0.280636	BIN67
ATAC	chr1:215114159-215114160	Non-Epi	345.054	157.024	1.13086	BIN67
ATAC	chr1:215114488-215114489	Non-Epi	345.939	146.902	1.23004	BIN67
ATAC	chr1:215114761-215114762	Non-Epi	260.403	117.496	1.14144	BIN67
ATAC	chr1:215570602-215570603	Non-Epi	160.848	131.273	0.291127	BIN67
ATAC	chr1:215843847-215843848	Non-Epi	89.7274	84.6287	0.0834449	BIN67
ATAC	chr1:216182997-216182998	Non-Epi	220.823	128.186	0.77996	BIN67
ATAC	chr1:21638783-21638784	Non-Epi	195.28	106.887	0.863394	BIN67
ATAC	chr1:21638976-21638977	Non-Epi	204.42	109.177	0.898751	BIN67
ATAC	chr1:217188706-217188707	Non-Epi	148.6	79.5436	0.893273	BIN67
ATAC	chr1:21764844-21764845	Non-Epi	386.657	150.931	1.35136	BIN67
ATAC	chr1:217660584-217660585	Non-Epi	352.154	213.481	0.719447	BIN67
ATAC	chr1:21783458-21783459	Non-Epi	1865.69	1457.29	0.356202	BIN67
ATAC	chr1:21783863-21783864	Non-Epi	1018.42	712.561	0.514635	BIN67
ATAC	chr1:218375075-218375076	Non-Epi	128.169	107.878	0.246555	BIN67
ATAC	chr1:218377626-218377627	Non-Epi	327.369	126.431	1.3656	BIN67
ATAC	chr1:218421689-218421690	Non-Epi	185.109	116.423	0.664429	BIN67
ATAC	chr1:218460144-218460145	Non-Epi	412.381	191.515	1.1025	BIN67
ATAC	chr1:218460223-218460224	Non-Epi	405.643	198.826	1.02502	BIN67
ATAC	chr1:218476647-218476648	Non-Epi	107.25	119.055	-0.14933	BIN67
ATAC	chr1:218479913-218479914	Non-Epi	306.143	150.233	1.02214	BIN67
ATAC	chr1:218480609-218480610	Non-Epi	282.532	151.24	0.897167	BIN67
ATAC	chr1:218488001-218488002	Non-Epi	167.514	107.406	0.636419	BIN67
ATAC	chr1:218498597-218498598	Non-Epi	226.514	115.221	0.969081	BIN67
ATAC	chr1:218585843-218585844	Non-Epi	303.758	114.003	1.406	BIN67
ATAC	chr1:218660723-218660724	Non-Epi	260.945	137.089	0.923664	BIN67
ATAC	chr1:218801834-218801835	Non-Epi	86.7106	73.5323	0.234886	BIN67
ATAC	chr1:219189177-219189178	Non-Epi	104.053	70.6404	0.55227	BIN67
ATAC	chr1:219798536-219798537	Non-Epi	195.28	96.765	1.00552	BIN67
ATAC	chr1:22025902-22025903	Non-Epi	723.89	591.54	0.290849	BIN67
ATAC	chr1:22026073-22026074	Non-Epi	492.589	375.297	0.391436	BIN67
ATAC	chr1:220272612-220272613	Non-Epi	1514.04	1380.8	0.132805	BIN67
ATAC	chr1:220300869-220300870	Non-Epi	257.657	87.4393	1.54828	BIN67
ATAC	chr1:220326754-220326755	Non-Epi	241.923	95.5627	1.33096	BIN67
ATAC	chr1:220337328-220337329	Non-Epi	209.298	131.273	0.668918	BIN67
ATAC	chr1:220370446-220370447	Non-Epi	331.054	170.98	0.949181	BIN67
ATAC	chr1:220430302-220430303	Non-Epi	263.6	100.632	1.38047	BIN67
ATAC	chr1:220432597-220432598	Non-Epi	208.756	187.86	0.151395	BIN67
ATAC	chr1:220516194-220516195	Non-Epi	227.652	118.795	0.93258	BIN67
ATAC	chr1:220528429-220528430	Non-Epi	1117.56	1076.31	0.0542082	BIN67
ATAC	chr1:220787388-220787389	Non-Epi	333.583	403.794	-0.274823	BIN67
ATAC	chr1:220879880-220879881	Non-Epi	845.429	827.604	0.0307076	BIN67
ATAC	chr1:221439577-221439578	Non-Epi	297.237	154.684	0.937836	BIN67
ATAC	chr1:221742175-221742176	Non-Epi	1097.52	922.972	0.249644	BIN67
ATAC	chr1:221742329-221742330	Non-Epi	1134.34	955.4	0.247436	BIN67
ATAC	chr1:221824158-221824159	Non-Epi	325.418	149.891	1.11321	BIN67
ATAC	chr1:221839803-221839804	Non-Epi	343.465	153.969	1.15237	BIN67
ATAC	chr1:221869118-221869119	Non-Epi	179.13	121.655	0.554433	BIN67
ATAC	chr1:221887348-221887349	Non-Epi	453.533	209.094	1.11335	BIN67
ATAC	chr1:221909319-221909320	Non-Epi	144.391	171.272	-0.244748	BIN67
ATAC	chr1:221958273-221958274	Non-Epi	228.32	89.7464	1.33745	BIN67
ATAC	chr1:221987821-221987822	Non-Epi	250.07	153.254	0.702778	BIN67
ATAC	chr1:222074304-222074305	Non-Epi	157.813	137.836	0.193947	BIN67
ATAC	chr1:222582049-222582050	Non-Epi	211.068	111.192	0.91856	BIN67
ATAC	chr1:222712745-222712746	Non-Epi	2238.67	2003.13	0.160311	BIN67
ATAC	chr1:222770257-222770258	Non-Epi	137.78	84.5474	0.698	BIN67
ATAC	chr1:222778090-222778091	Non-Epi	164.75	106.253	0.627995	BIN67
ATAC	chr1:222814905-222814906	Non-Epi	657.737	724.681	-0.139634	BIN67
ATAC	chr1:222817853-222817854	Non-Epi	352.587	160.452	1.13096	BIN67
ATAC	chr1:222818487-222818488	Non-Epi	173.548	130.087	0.4131	BIN67
ATAC	chr1:223081424-223081425	Non-Epi	929.611	839.822	0.146378	BIN67
ATAC	chr1:223109753-223109754	Non-Epi	162.42	120.907	0.422798	BIN67
ATAC	chr1:223363774-223363775	Non-Epi	352.912	280.32	0.331183	BIN67
ATAC	chr1:223380508-223380509	Non-Epi	122.949	121.07	0.0220337	BIN67
ATAC	chr1:223402556-223402557	Non-Epi	163.811	98.1622	0.73295	BIN67
ATAC	chr1:223429594-223429595	Non-Epi	210.743	144.92	0.537138	BIN67
ATAC	chr1:223500739-223500740	Non-Epi	372.675	181.686	1.03242	BIN67
ATAC	chr1:223670773-223670774	Non-Epi	220.498	149.973	0.553007	BIN67
ATAC	chr1:223701229-223701230	Non-Epi	520.083	259.443	1.00055	BIN67
ATAC	chr1:223707470-223707471	Non-Epi	356.417	172.864	1.03965	BIN67
ATAC	chr1:223708384-223708385	Non-Epi	211.646	124.709	0.758366	BIN67
ATAC	chr1:223712646-223712647	Non-Epi	818.187	849.212	-0.053629	BIN67
ATAC	chr1:223726831-223726832	Non-Epi	269.887	141.281	0.928952	BIN67
ATAC	chr1:223739381-223739382	Non-Epi	201.909	143.311	0.491649	BIN67
ATAC	chr1:223765291-223765292	Non-Epi	196.346	187.909	0.0630358	BIN67
ATAC	chr1:223771793-223771794	Non-Epi	191.902	125.765	0.605707	BIN67
ATAC	chr1:223772052-223772053	Non-Epi	209.153	111.809	0.897557	BIN67
ATAC	chr1:223775890-223775891	Non-Epi	160.776	96.8299	0.725651	BIN67
ATAC	chr1:223831950-223831951	Non-Epi	102.246	98.1297	0.0587018	BIN67
ATAC	chr1:223844891-223844892	Non-Epi	439.027	376.971	0.219317	BIN67
ATAC	chr1:223888247-223888248	Non-Epi	141.483	127.877	0.144791	BIN67
ATAC	chr1:224065662-224065663	Non-Epi	104.631	73.5648	0.502466	BIN67
ATAC	chr1:224211421-224211422	Non-Epi	112.453	127.39	-0.178437	BIN67
ATAC	chr1:224260078-224260079	Non-Epi	214.103	109.307	0.963499	BIN67
ATAC	chr1:224260164-224260165	Non-Epi	213.38	112.589	0.916349	BIN67
ATAC	chr1:22428882-22428883	Non-Epi	189.788	209.582	-0.142408	BIN67
ATAC	chr1:224357374-224357375	Non-Epi	891.349	862.014	0.0482246	BIN67
ATAC	chr1:224498421-224498422	Non-Epi	251.714	110.867	1.17572	BIN67
ATAC	chr1:224503802-224503803	Non-Epi	347.89	187.064	0.891552	BIN67
ATAC	chr1:22451832-22451833	Non-Epi	780.396	751.732	0.053918	BIN67
ATAC	chr1:22452435-22452436	Non-Epi	536.341	486.425	0.14066	BIN67
ATAC	chr1:224542895-224542896	Non-Epi	247.125	138.909	0.826583	BIN67
ATAC	chr1:224543139-224543140	Non-Epi	258.795	132.361	0.962035	BIN67
ATAC	chr1:225428205-225428206	Non-Epi	1815.5	1846.35	-0.0242915	BIN67
ATAC	chr1:225428378-225428379	Non-Epi	1771.82	1791.45	-0.015885	BIN67
ATAC	chr1:225454770-225454771	Non-Epi	254.351	162.954	0.639196	BIN67
ATAC	chr1:225475152-225475153	Non-Epi	543.82	604.992	-0.153519	BIN67
ATAC	chr1:225508748-225508749	Non-Epi	290.445	179.915	0.687908	BIN67
ATAC	chr1:225515065-225515066	Non-Epi	164.208	179.85	-0.13051	BIN67
ATAC	chr1:225517785-225517786	Non-Epi	348.468	277.98	0.325001	BIN67
ATAC	chr1:225519567-225519568	Non-Epi	189.336	216.097	-0.189786	BIN67
ATAC	chr1:225602840-225602841	Non-Epi	138.195	139.721	-0.0157292	BIN67
ATAC	chr1:225603746-225603747	Non-Epi	187.042	171.857	0.121478	BIN67
ATAC	chr1:225608965-225608966	Non-Epi	254.08	245.243	0.0508685	BIN67
ATAC	chr1:225609534-225609535	Non-Epi	281.412	297.963	-0.0821655	BIN67
ATAC	chr1:225609841-225609842	Non-Epi	236.016	286.623	-0.279198	BIN67
ATAC	chr1:225617910-225617911	Non-Epi	223.822	243.537	-0.121271	BIN67
ATAC	chr1:225655449-225655450	Non-Epi	982.269	763.722	0.362651	BIN67
ATAC	chr1:225655835-225655836	Non-Epi	1139.25	902.582	0.335625	BIN67
ATAC	chr1:225735818-225735819	Non-Epi	418.487	254	0.718131	BIN67
ATAC	chr1:225735927-225735928	Non-Epi	436.733	250.686	0.798428	BIN67
ATAC	chr1:225777766-225777767	Non-Epi	2268.42	2013.28	0.172059	BIN67
ATAC	chr1:225817821-225817822	Non-Epi	316.458	214.602	0.558196	BIN67
ATAC	chr1:225911629-225911630	Non-Epi	344.404	315.77	0.12485	BIN67
ATAC	chr1:225924381-225924382	Non-Epi	1278.37	1259.89	0.0209847	BIN67
ATAC	chr1:225933298-225933299	Non-Epi	162.583	122.695	0.403236	BIN67
ATAC	chr1:225999461-225999462	Non-Epi	2548.81	2139.52	0.252426	BIN67
ATAC	chr1:226062811-226062812	Non-Epi	2978.91	2662.66	0.161858	BIN67
ATAC	chr1:226097918-226097919	Non-Epi	139.64	128.283	0.121473	BIN67
ATAC	chr1:226109824-226109825	Non-Epi	475.572	436.807	0.122399	BIN67
ATAC	chr1:226182294-226182295	Non-Epi	463.252	362.788	0.351811	BIN67
ATAC	chr1:226182682-226182683	Non-Epi	382.972	325.518	0.233841	BIN67
ATAC	chr1:226268851-226268852	Non-Epi	135.106	175.236	-0.37278	BIN67
ATAC	chr1:226268914-226268915	Non-Epi	141.085	173.124	-0.293358	BIN67
ATAC	chr1:226272524-226272525	Non-Epi	216.415	149.437	0.531299	BIN67
ATAC	chr1:226662983-226662984	Non-Epi	223.19	197.364	0.176568	BIN67
ATAC	chr1:226717718-226717719	Non-Epi	166.159	130.915	0.341612	BIN67
ATAC	chr1:226778724-226778725	Non-Epi	258.326	141.606	0.862733	BIN67
ATAC	chr1:226814982-226814983	Non-Epi	290.264	133.58	1.11387	BIN67
ATAC	chr1:226828101-226828102	Non-Epi	256.302	333.608	-0.37901	BIN67
ATAC	chr1:226940067-226940068	Non-Epi	2762.73	2616.23	0.0785754	BIN67
ATAC	chr1:227058883-227058884	Non-Epi	119.39	127.081	-0.0893468	BIN67
ATAC	chr1:227093283-227093284	Non-Epi	176.529	195.268	-0.144777	BIN67
ATAC	chr1:227093742-227093743	Non-Epi	158.789	194.667	-0.292234	BIN67
ATAC	chr1:227316102-227316103	Non-Epi	162.655	148.852	0.127121	BIN67
ATAC	chr1:227317172-227317173	Non-Epi	191.125	189.046	0.0156961	BIN67
ATAC	chr1:227317876-227317877	Non-Epi	710.449	691.002	0.0399838	BIN67
ATAC	chr1:22735452-22735453	Non-Epi	163.233	131.143	0.313646	BIN67
ATAC	chr1:227357407-227357408	Non-Epi	215.205	149.68	0.520909	BIN67
ATAC	chr1:227542491-227542492	Non-Epi	629.899	526.976	0.256936	BIN67
ATAC	chr1:227735491-227735492	Non-Epi	1820.06	1534.3	0.246255	BIN67
ATAC	chr1:227934909-227934910	Non-Epi	405.824	185.065	1.12859	BIN67
ATAC	chr1:227935046-227935047	Non-Epi	410.394	200.256	1.03149	BIN67
ATAC	chr1:227946336-227946337	Non-Epi	800.592	551.931	0.53577	BIN67
ATAC	chr1:227996625-227996626	Non-Epi	142.079	116.163	0.28829	BIN67
ATAC	chr1:228087777-228087778	Non-Epi	323.377	204.594	0.657872	BIN67
ATAC	chr1:228101195-228101196	Non-Epi	477.993	479.438	-0.00434807	BIN67
ATAC	chr1:228139927-228139928	Non-Epi	3224.21	2800.65	0.203119	BIN67
ATAC	chr1:22832241-22832242	Non-Epi	381.419	175.561	1.11499	BIN67
ATAC	chr1:22832375-22832376	Non-Epi	373.217	167.097	1.15459	BIN67
ATAC	chr1:228458056-228458057	Non-Epi	5550.03	4758.61	0.221912	BIN67
ATAC	chr1:228469855-228469856	Non-Epi	179.292	178.632	0.00529635	BIN67
ATAC	chr1:228536790-228536791	Non-Epi	349.01	237.201	0.555219	BIN67
ATAC	chr1:228545295-228545296	Non-Epi	1796.63	1433.2	0.325849	BIN67
ATAC	chr1:228552486-228552487	Non-Epi	809.408	753.097	0.103899	BIN67
ATAC	chr1:228620860-228620861	Non-Epi	60.1555	51.3394	0.224586	BIN67
ATAC	chr1:228810112-228810113	Non-Epi	335.823	154.993	1.11051	BIN67
ATAC	chr1:228831372-228831373	Non-Epi	200.338	78.8286	1.33464	BIN67
ATAC	chr1:228838512-228838513	Non-Epi	229.169	128.153	0.833609	BIN67
ATAC	chr1:228842279-228842280	Non-Epi	208.07	142.223	0.545719	BIN67
ATAC	chr1:228860708-228860709	Non-Epi	169.158	161.817	0.0636284	BIN67
ATAC	chr1:228861342-228861343	Non-Epi	362.704	182.872	0.984059	BIN67
ATAC	chr1:228964329-228964330	Non-Epi	172.103	204.236	-0.245659	BIN67
ATAC	chr1:229064380-229064381	Non-Epi	141.989	109.665	0.369706	BIN67
ATAC	chr1:229075605-229075606	Non-Epi	162.583	105.116	0.62438	BIN67
ATAC	chr1:229271408-229271409	Non-Epi	1048.91	1012.52	0.0508861	BIN67
ATAC	chr1:229389205-229389206	Non-Epi	137.111	116.245	0.236309	BIN67
ATAC	chr1:229508590-229508591	Non-Epi	1832.49	1672.1	0.132061	BIN67
ATAC	chr1:229559135-229559136	Non-Epi	3269.9	3017.57	0.11582	BIN67
ATAC	chr1:230084641-230084642	Non-Epi	293.642	233.545	0.329096	BIN67
ATAC	chr1:230104839-230104840	Non-Epi	357.302	139.477	1.35084	BIN67
ATAC	chr1:230186487-230186488	Non-Epi	111.55	68.187	0.701988	BIN67
ATAC	chr1:23019444-23019445	Non-Epi	1030.81	1018.27	0.0176343	BIN67
ATAC	chr1:230459302-230459303	Non-Epi	104.848	69.4381	0.58756	BIN67
ATAC	chr1:230459544-230459545	Non-Epi	118.757	54.1013	1.11996	BIN67
ATAC	chr1:230459835-230459836	Non-Epi	115.434	61.4123	0.899605	BIN67
ATAC	chr1:230804635-230804636	Non-Epi	68.2846	105.278	-0.617238	BIN67
ATAC	chr1:230825229-230825230	Non-Epi	203.644	167.584	0.279647	BIN67
ATAC	chr1:230872093-230872094	Non-Epi	97.1701	133.596	-0.455281	BIN67
ATAC	chr1:230891473-230891474	Non-Epi	104.811	91.2411	0.198014	BIN67
ATAC	chr1:23101785-23101786	Non-Epi	133.95	126.561	0.0812342	BIN67
ATAC	chr1:2311789-2311790	Non-Epi	258.037	265.405	-0.0404658	BIN67
ATAC	chr1:231279449-231279450	Non-Epi	160.632	115.335	0.474426	BIN67
ATAC	chr1:231395772-231395773	Non-Epi	250.847	139.429	0.84271	BIN67
ATAC	chr1:231421291-231421292	Non-Epi	659.561	590.029	0.160462	BIN67
ATAC	chr1:231528489-231528490	Non-Epi	1199.08	1221.96	-0.027242	BIN67
ATAC	chr1:231827644-231827645	Non-Epi	134.943	112.752	0.257119	BIN67
ATAC	chr1:231828617-231828618	Non-Epi	216.217	116.342	0.888414	BIN67
ATAC	chr1:231872372-231872373	Non-Epi	133.787	133.645	0.00152645	BIN67
ATAC	chr1:23189038-23189039	Non-Epi	186.067	117.366	0.660301	BIN67
ATAC	chr1:23196921-23196922	Non-Epi	149.233	73.1748	1.0182	BIN67
ATAC	chr1:232142627-232142628	Non-Epi	271.477	114.717	1.23553	BIN67
ATAC	chr1:232142759-232142760	Non-Epi	294.491	130.412	1.16902	BIN67
ATAC	chr1:232538492-232538493	Non-Epi	175.842	135.919	0.369136	BIN67
ATAC	chr1:232854243-232854244	Non-Epi	150.172	96.2289	0.636735	BIN67
ATAC	chr1:233113314-233113315	Non-Epi	334.884	157.917	1.07969	BIN67
ATAC	chr1:233172173-233172174	Non-Epi	129.596	148.023	-0.190423	BIN67
ATAC	chr1:233543832-233543833	Non-Epi	350.419	215.593	0.698208	BIN67
ATAC	chr1:233707529-233707530	Non-Epi	311.996	161.037	0.949823	BIN67
ATAC	chr1:233791371-233791372	Non-Epi	257.169	292.423	-0.184665	BIN67
ATAC	chr1:233909342-233909343	Non-Epi	209.479	119.64	0.802962	BIN67
ATAC	chr1:233917088-233917089	Non-Epi	112.652	87.1794	0.366104	BIN67
ATAC	chr1:234310167-234310168	Non-Epi	391.499	380.578	0.0407112	BIN67
ATAC	chr1:234370073-234370074	Non-Epi	92.0759	97.366	-0.0797521	BIN67
ATAC	chr1:234515566-234515567	Non-Epi	178.118	127.829	0.475459	BIN67
ATAC	chr1:234515742-234515743	Non-Epi	199.182	131.11	0.599566	BIN67
ATAC	chr1:234516037-234516038	Non-Epi	172.157	109.795	0.644189	BIN67
ATAC	chr1:234523768-234523769	Non-Epi	128.332	100.729	0.346345	BIN67
ATAC	chr1:234533280-234533281	Non-Epi	270.248	142.483	0.918734	BIN67
ATAC	chr1:234564513-234564514	Non-Epi	261.433	129.811	1.00447	BIN67
ATAC	chr1:234599646-234599647	Non-Epi	796.582	722.585	0.14047	BIN67
ATAC	chr1:234600177-234600178	Non-Epi	1372.25	1344	0.0299856	BIN67
ATAC	chr1:234610193-234610194	Non-Epi	1705.56	1447.15	0.236878	BIN67
ATAC	chr1:234610823-234610824	Non-Epi	2292.32	2167.86	0.0805054	BIN67
ATAC	chr1:234628279-234628280	Non-Epi	137.996	153.385	-0.15148	BIN67
ATAC	chr1:234631555-234631556	Non-Epi	208.557	87.9755	1.23586	BIN67
ATAC	chr1:234632042-234632043	Non-Epi	269.67	99.8843	1.42383	BIN67
ATAC	chr1:234700359-234700360	Non-Epi	211.14	169.306	0.316889	BIN67
ATAC	chr1:234724304-234724305	Non-Epi	746.723	226.283	1.71801	BIN67
ATAC	chr1:23484217-23484218	Non-Epi	1188.71	1045.7	0.184767	BIN67
ATAC	chr1:234933695-234933696	Non-Epi	168.363	173.433	-0.0425505	BIN67
ATAC	chr1:234975296-234975297	Non-Epi	226.821	142.126	0.670617	BIN67
ATAC	chr1:234997469-234997470	Non-Epi	316.62	207.193	0.609379	BIN67
ATAC	chr1:235067753-235067754	Non-Epi	501.35	166.934	1.5808	BIN67
ATAC	chr1:235129265-235129266	Non-Epi	1868.62	1697.77	0.138248	BIN67
ATAC	chr1:235161409-235161410	Non-Epi	843.533	843.249	0.000483961	BIN67
ATAC	chr1:235246630-235246631	Non-Epi	77.317	86.5946	-0.161516	BIN67
ATAC	chr1:235367324-235367325	Non-Epi	1559.56	1456.67	0.0983999	BIN67
ATAC	chr1:235367486-235367487	Non-Epi	1592.88	1474.45	0.111386	BIN67
ATAC	chr1:235402776-235402777	Non-Epi	162.546	109.307	0.568171	BIN67
ATAC	chr1:235404384-235404385	Non-Epi	296.298	153.401	0.945228	BIN67
ATAC	chr1:235417114-235417115	Non-Epi	213.381	226.153	-0.0834919	BIN67
ATAC	chr1:23550112-23550113	Non-Epi	149.287	156.358	-0.0663285	BIN67
ATAC	chr1:235504816-235504817	Non-Epi	3858.12	3559.41	0.116227	BIN67
ATAC	chr1:235589224-235589225	Non-Epi	180.792	144.855	0.317752	BIN67
ATAC	chr1:23559619-23559620	Non-Epi	2054.83	1891.06	0.11976	BIN67
ATAC	chr1:23562400-23562401	Non-Epi	792.138	745.233	0.0879456	BIN67
ATAC	chr1:23564268-23564269	Non-Epi	340.014	350.278	-0.0427796	BIN67
ATAC	chr1:23577082-23577083	Non-Epi	157.199	89.0315	0.81324	BIN67
ATAC	chr1:23577323-23577324	Non-Epi	137.599	105.262	0.383292	BIN67
ATAC	chr1:235903057-235903058	Non-Epi	214.212	107.13	0.992985	BIN67
ATAC	chr1:235908884-235908885	Non-Epi	264.359	159.25	0.727626	BIN67
ATAC	chr1:235909007-235909008	Non-Epi	287.319	164.351	0.802137	BIN67
ATAC	chr1:235910345-235910346	Non-Epi	624.588	304.056	1.03614	BIN67
ATAC	chr1:235910695-235910696	Non-Epi	706.782	310.798	1.18269	BIN67
ATAC	chr1:235910981-235910982	Non-Epi	616.224	310.652	0.985857	BIN67
ATAC	chr1:235920470-235920471	Non-Epi	312.7	157.105	0.988505	BIN67
ATAC	chr1:235952946-235952947	Non-Epi	154.634	123.799	0.318547	BIN67
ATAC	chr1:236010252-236010253	Non-Epi	122.949	103.783	0.24233	BIN67
ATAC	chr1:23637414-23637415	Non-Epi	266.093	287.078	-0.109115	BIN67
ATAC	chr1:236507430-236507431	Non-Epi	268.442	151.906	0.817329	BIN67
ATAC	chr1:236524714-236524715	Non-Epi	340.231	393.201	-0.208184	BIN67
ATAC	chr1:236604770-236604771	Non-Epi	1243.03	1033.45	0.266163	BIN67
ATAC	chr1:236623737-236623738	Non-Epi	204.276	116.375	0.806444	BIN67
ATAC	chr1:236795358-236795359	Non-Epi	2516.42	2444.83	0.041621	BIN67
ATAC	chr1:23691869-23691870	Non-Epi	752.92	718.247	0.0679235	BIN67
ATAC	chr1:237678203-237678204	Non-Epi	128.928	145.034	-0.168589	BIN67
ATAC	chr1:23780005-23780006	Non-Epi	147.047	141.833	0.0517238	BIN67
ATAC	chr1:237875565-237875566	Non-Epi	201.873	154.424	0.384367	BIN67
ATAC	chr1:238062314-238062315	Non-Epi	185.055	107.585	0.776902	BIN67
ATAC	chr1:238409486-238409487	Non-Epi	292.649	145.57	1.0025	BIN67
ATAC	chr1:238647833-238647834	Non-Epi	352.407	233.724	0.590363	BIN67
ATAC	chr1:238653929-238653930	Non-Epi	290.083	191.109	0.599505	BIN67
ATAC	chr1:23868159-23868160	Non-Epi	567.629	545.611	0.0569741	BIN67
ATAC	chr1:2391663-2391664	Non-Epi	1595.82	1517.18	0.0728621	BIN67
ATAC	chr1:2392334-2392335	Non-Epi	445.548	361.358	0.301401	BIN67
ATAC	chr1:23981400-23981401	Non-Epi	193.473	135.172	0.514142	BIN67
ATAC	chr1:239814588-239814589	Non-Epi	326.682	147.162	1.14512	BIN67
ATAC	chr1:23984841-23984842	Non-Epi	117.258	98.7308	0.245828	BIN67
ATAC	chr1:239858254-239858255	Non-Epi	243.982	101.346	1.25922	BIN67
ATAC	chr1:239858422-239858423	Non-Epi	255.76	106.513	1.25591	BIN67
ATAC	chr1:240031286-240031287	Non-Epi	200.338	97.0574	1.03792	BIN67
ATAC	chr1:240031407-240031408	Non-Epi	217.77	97.1061	1.157	BIN67
ATAC	chr1:24018723-24018724	Non-Epi	165.744	90.64	0.863585	BIN67
ATAC	chr1:24046524-24046525	Non-Epi	136.678	115.708	0.238386	BIN67
ATAC	chr1:240765636-240765637	Non-Epi	185.127	106.318	0.794398	BIN67
ATAC	chr1:24117888-24117889	Non-Epi	143.759	122.012	0.234852	BIN67
ATAC	chr1:241239834-241239835	Non-Epi	167.641	131.663	0.34619	BIN67
ATAC	chr1:241424750-241424751	Non-Epi	225.448	271.481	-0.266979	BIN67
ATAC	chr1:241483173-241483174	Non-Epi	200.97	99.998	0.999814	BIN67
ATAC	chr1:241519622-241519623	Non-Epi	2849.42	2681.57	0.0875577	BIN67
ATAC	chr1:241828631-241828632	Non-Epi	262.914	118.86	1.13871	BIN67
ATAC	chr1:241848026-241848027	Non-Epi	1573.73	1571.11	0.00239383	BIN67
ATAC	chr1:241989249-241989250	Non-Epi	140.182	94.4741	0.564377	BIN67
ATAC	chr1:242629590-242629591	Non-Epi	143.073	70.8354	1.00403	BIN67
ATAC	chr1:24266854-24266855	Non-Epi	369.46	122.305	1.58709	BIN67
ATAC	chr1:242811349-242811350	Non-Epi	92.2204	48.1225	0.924261	BIN67
ATAC	chr1:242824456-242824457	Non-Epi	294.238	136.114	1.1065	BIN67
ATAC	chr1:24294589-24294590	Non-Epi	118.234	116.895	0.0162937	BIN67
ATAC	chr1:243254072-243254073	Non-Epi	615.501	482.427	0.350805	BIN67
ATAC	chr1:243306806-243306807	Non-Epi	63.4433	111.192	-0.799868	BIN67
ATAC	chr1:24363376-24363377	Non-Epi	135.341	95.0753	0.504981	BIN67
ATAC	chr1:24365415-24365416	Non-Epi	159.15	77.0902	1.03621	BIN67
ATAC	chr1:243843180-243843181	Non-Epi	115.072	98.617	0.220559	BIN67
ATAC	chr1:24392157-24392158	Non-Epi	324.822	321.212	0.0160712	BIN67
ATAC	chr1:243926795-243926796	Non-Epi	273.861	144.595	0.916742	BIN67
ATAC	chr1:24412404-24412405	Non-Epi	214.031	121.46	0.812236	BIN67
ATAC	chr1:244164079-244164080	Non-Epi	381.563	148.868	1.35201	BIN67
ATAC	chr1:244222897-244222898	Non-Epi	138.9	138.633	0.00275813	BIN67
ATAC	chr1:244274041-244274042	Non-Epi	278.793	137.674	1.01266	BIN67
ATAC	chr1:244299832-244299833	Non-Epi	240.333	293.024	-0.284911	BIN67
ATAC	chr1:244323096-244323097	Non-Epi	181.261	115.903	0.640692	BIN67
ATAC	chr1:244353882-244353883	Non-Epi	183.538	139.429	0.394078	BIN67
ATAC	chr1:244382136-244382137	Non-Epi	132.378	140.338	-0.0836296	BIN67
ATAC	chr1:244392196-244392197	Non-Epi	240.622	180.24	0.41485	BIN67
ATAC	chr1:244452153-244452154	Non-Epi	3432.37	3134.07	0.131125	BIN67
ATAC	chr1:244521679-244521680	Non-Epi	38.0985	41.9975	-0.137141	BIN67
ATAC	chr1:244600046-244600047	Non-Epi	213.2	114.441	0.891798	BIN67
ATAC	chr1:244833885-244833886	Non-Epi	512.135	415.752	0.30015	BIN67
ATAC	chr1:244863422-244863423	Non-Epi	2615.92	2397.68	0.125627	BIN67
ATAC	chr1:244964579-244964580	Non-Epi	274.602	225.585	0.282536	BIN67
ATAC	chr1:244970872-244970873	Non-Epi	4054.7	3487.86	0.217195	BIN67
ATAC	chr1:244971051-244971052	Non-Epi	3646.15	3196.06	0.190025	BIN67
ATAC	chr1:244971150-244971151	Non-Epi	3288.14	2905.22	0.178565	BIN67
ATAC	chr1:244971412-244971413	Non-Epi	1755.31	1664.66	0.0764535	BIN67
ATAC	chr1:244971613-244971614	Non-Epi	773.333	789.441	-0.0297038	BIN67
ATAC	chr1:245092109-245092110	Non-Epi	248.137	136.001	0.862757	BIN67
ATAC	chr1:245380153-245380154	Non-Epi	216.325	119.754	0.847784	BIN67
ATAC	chr1:24562361-24562362	Non-Epi	102.355	100.29	0.0291062	BIN67
ATAC	chr1:245788343-245788344	Non-Epi	365.16	153.742	1.24261	BIN67
ATAC	chr1:246139946-246139947	Non-Epi	306.197	89.6814	1.76029	BIN67
ATAC	chr1:246317885-246317886	Non-Epi	59.7942	99.1044	-0.719501	BIN67
ATAC	chr1:24643143-24643144	Non-Epi	2465.27	2184.83	0.174151	BIN67
ATAC	chr1:246515569-246515570	Non-Epi	165.184	163.181	0.0174906	BIN67
ATAC	chr1:246608885-246608886	Non-Epi	222.377	108.04	1.03462	BIN67
ATAC	chr1:246682617-246682618	Non-Epi	161.661	123.361	0.387339	BIN67
ATAC	chr1:246699430-246699431	Non-Epi	350.817	326.232	0.104509	BIN67
ATAC	chr1:246705330-246705331	Non-Epi	150.66	91.956	0.706219	BIN67
ATAC	chr1:24683828-24683829	Non-Epi	239.574	106.155	1.16678	BIN67
ATAC	chr1:246885679-246885680	Non-Epi	120.835	117.756	0.036933	BIN67
ATAC	chr1:247007092-247007093	Non-Epi	222.449	292.765	-0.394714	BIN67
ATAC	chr1:247104447-247104448	Non-Epi	1194.73	970.509	0.299591	BIN67
ATAC	chr1:247332123-247332124	Non-Epi	865.264	751.927	0.202298	BIN67
ATAC	chr1:247385432-247385433	Non-Epi	148.998	133.32	0.159269	BIN67
ATAC	chr1:247529044-247529045	Non-Epi	375.602	147.552	1.34207	BIN67
ATAC	chr1:247906659-247906660	Non-Epi	244.867	111.647	1.12607	BIN67
ATAC	chr1:248245706-248245707	Non-Epi	140.074	153.368	-0.129924	BIN67
ATAC	chr1:248821386-248821387	Non-Epi	779.927	303.097	1.36065	BIN67
ATAC	chr1:248927301-248927302	Non-Epi	229.91	152.085	0.592998	BIN67
ATAC	chr1:2521640-2521641	Non-Epi	146.324	155.318	-0.0854878	BIN67
ATAC	chr1:25430598-25430599	Non-Epi	2034.23	1807.18	0.170656	BIN67
ATAC	chr1:25859535-25859536	Non-Epi	674.898	560.022	0.26875	BIN67
ATAC	chr1:25890693-25890694	Non-Epi	250.702	169.826	0.55919	BIN67
ATAC	chr1:25892558-25892559	Non-Epi	303.271	192.458	0.653337	BIN67
ATAC	chr1:25892658-25892659	Non-Epi	303.668	186.576	0.69976	BIN67
ATAC	chr1:26123502-26123503	Non-Epi	82.5196	59.2027	0.472287	BIN67
ATAC	chr1:26237807-26237808	Non-Epi	103.294	98.0485	0.07445	BIN67
ATAC	chr1:26351554-26351555	Non-Epi	195.822	98.4546	0.984779	BIN67
ATAC	chr1:26378132-26378133	Non-Epi	126.995	147.844	-0.217718	BIN67
ATAC	chr1:26404966-26404967	Non-Epi	107.774	96.2451	0.161639	BIN67
ATAC	chr1:26531300-26531301	Non-Epi	441.502	298.613	0.562582	BIN67
ATAC	chr1:2653998-2653999	Non-Epi	162.98	181.572	-0.154949	BIN67
ATAC	chr1:2655754-2655755	Non-Epi	183.827	132.215	0.472415	BIN67
ATAC	chr1:26692889-26692890	Non-Epi	1155.53	1208.39	-0.0644817	BIN67
ATAC	chr1:26698259-26698260	Non-Epi	539.196	454.744	0.24526	BIN67
ATAC	chr1:26723372-26723373	Non-Epi	250.991	195.382	0.35971	BIN67
ATAC	chr1:26772049-26772050	Non-Epi	383.045	131.744	1.53263	BIN67
ATAC	chr1:26787219-26787220	Non-Epi	511.665	447.725	0.192186	BIN67
ATAC	chr1:26788035-26788036	Non-Epi	1245.47	1159.36	0.103278	BIN67
ATAC	chr1:26849384-26849385	Non-Epi	298.718	129.551	1.199	BIN67
ATAC	chr1:26862022-26862023	High-Epi	198.098	167.763	0.23848	BIN67
ATAC	chr1:26865356-26865357	High-Epi	1419.56	1332.88	0.0908382	BIN67
ATAC	chr1:26991066-26991067	Non-Epi	242.14	156.618	0.625357	BIN67
ATAC	chr1:27013118-27013119	Non-Epi	948.434	900.259	0.0751263	BIN67
ATAC	chr1:27046157-27046158	Non-Epi	137.472	152.897	-0.152367	BIN67
ATAC	chr1:27099627-27099628	Non-Epi	179.961	143.588	0.323732	BIN67
ATAC	chr1:27166716-27166717	Non-Epi	114.277	105.538	0.113741	BIN67
ATAC	chr1:27366876-27366877	Non-Epi	790.946	783.25	0.0140878	BIN67
ATAC	chr1:2750115-2750116	Non-Epi	20.1422	27.538	-0.432764	BIN67
ATAC	chr1:27542499-27542500	Non-Epi	250.269	140.533	0.828089	BIN67
ATAC	chr1:27564025-27564026	Non-Epi	232.132	199.996	0.213977	BIN67
ATAC	chr1:27650771-27650772	Non-Epi	145.457	83.6376	0.791107	BIN67
ATAC	chr1:27672526-27672527	Non-Epi	712.726	380.724	0.90284	BIN67
ATAC	chr1:27773146-27773147	Non-Epi	1319.99	1162.12	0.183616	BIN67
ATAC	chr1:27773769-27773770	Non-Epi	672.134	576.642	0.220718	BIN67
ATAC	chr1:27915093-27915094	Non-Epi	1396.71	1182.25	0.240308	BIN67
ATAC	chr1:28099455-28099456	Non-Epi	91.3172	113.239	-0.307385	BIN67
ATAC	chr1:28247315-28247316	Non-Epi	1261.01	1270.41	-0.0107042	BIN67
ATAC	chr1:28437690-28437691	Non-Epi	596.858	439.146	0.44182	BIN67
ATAC	chr1:28438275-28438276	Non-Epi	604.445	468.797	0.365961	BIN67
ATAC	chr1:28439663-28439664	Non-Epi	118.649	151.614	-0.351074	BIN67
ATAC	chr1:28509323-28509324	Non-Epi	187.674	157.007	0.255906	BIN67
ATAC	chr1:28513797-28513798	Non-Epi	238.4	194.034	0.295702	BIN67
ATAC	chr1:28515374-28515375	Non-Epi	312.845	295.201	0.0834736	BIN67
ATAC	chr1:28517925-28517926	Non-Epi	1059.77	1111.27	-0.0683995	BIN67
ATAC	chr1:28601944-28601945	Non-Epi	166.448	104.596	0.665164	BIN67
ATAC	chr1:28648341-28648342	Non-Epi	1302.21	1108.26	0.232471	BIN67
ATAC	chr1:28751229-28751230	Non-Epi	117.764	104.531	0.170434	BIN67
ATAC	chr1:28860432-28860433	Non-Epi	173.096	94.3929	0.867932	BIN67
ATAC	chr1:28887051-28887052	Non-Epi	416.356	467.481	-0.166712	BIN67
ATAC	chr1:28972221-28972222	Non-Epi	155.411	99.3482	0.640326	BIN67
ATAC	chr1:29570182-29570183	Non-Epi	254.929	86.7895	1.54363	BIN67
ATAC	chr1:29974271-29974272	Non-Epi	205.829	116.342	0.81772	BIN67
ATAC	chr1:29974550-29974551	Non-Epi	226.351	118.925	0.922785	BIN67
ATAC	chr1:30523002-30523003	Non-Epi	193.401	100.144	0.942621	BIN67
ATAC	chr1:30749053-30749054	Non-Epi	113.898	75.2869	0.590847	BIN67
ATAC	chr1:30824083-30824084	Non-Epi	176.763	151.094	0.224998	BIN67
ATAC	chr1:30934059-30934060	Non-Epi	208.015	138.096	0.587524	BIN67
ATAC	chr1:30934497-30934498	Non-Epi	148.366	102.337	0.531484	BIN67
ATAC	chr1:30964748-30964749	Non-Epi	155.573	163.929	-0.0750022	BIN67
ATAC	chr1:30966952-30966953	Non-Epi	212.73	170.525	0.317375	BIN67
ATAC	chr1:30991013-30991014	Non-Epi	84.3622	56.3271	0.574381	BIN67
ATAC	chr1:31010759-31010760	Non-Epi	262.155	301.879	-0.202826	BIN67
ATAC	chr1:31025300-31025301	Non-Epi	104.414	111.939	-0.0994798	BIN67
ATAC	chr1:31029060-31029061	Non-Epi	90.8656	122.499	-0.426909	BIN67
ATAC	chr1:31033741-31033742	Non-Epi	146.017	109.226	0.415519	BIN67
ATAC	chr1:31038364-31038365	Non-Epi	105.317	125.716	-0.253226	BIN67
ATAC	chr1:31154814-31154815	Non-Epi	878.741	821.073	0.0978125	BIN67
ATAC	chr1:31170944-31170945	Non-Epi	234.336	108.495	1.10385	BIN67
ATAC	chr1:31244329-31244330	Non-Epi	130.409	112.004	0.21769	BIN67
ATAC	chr1:31397334-31397335	Non-Epi	110.086	104.921	0.0686972	BIN67
ATAC	chr1:31422634-31422635	Non-Epi	212.875	182.612	0.220103	BIN67
ATAC	chr1:31520941-31520942	Non-Epi	108.19	68.577	0.650154	BIN67
ATAC	chr1:31531317-31531318	Non-Epi	161.029	84.45	0.923099	BIN67
ATAC	chr1:31549158-31549159	Non-Epi	425.171	414.224	0.0375434	BIN67
ATAC	chr1:31562968-31562969	Non-Epi	128.729	90.5587	0.502735	BIN67
ATAC	chr1:31574011-31574012	Non-Epi	161.878	113.093	0.513583	BIN67
ATAC	chr1:31715354-31715355	Non-Epi	795.245	751.309	0.0818867	BIN67
ATAC	chr1:31931904-31931905	Non-Epi	150.624	93.0932	0.688333	BIN67
ATAC	chr1:32014694-32014695	Non-Epi	736.571	623.904	0.239148	BIN67
ATAC	chr1:32062623-32062624	Non-Epi	134.347	151.159	-0.168909	BIN67
ATAC	chr1:32108080-32108081	Non-Epi	817.97	679.272	0.2677	BIN67
ATAC	chr1:32133572-32133573	Non-Epi	163.45	115.839	0.493129	BIN67
ATAC	chr1:32151592-32151593	Non-Epi	70.7775	98.6496	-0.473332	BIN67
ATAC	chr1:32236214-32236215	Non-Epi	235.022	146.187	0.681269	BIN67
ATAC	chr1:32448691-32448692	Non-Epi	349.281	386.605	-0.146073	BIN67
ATAC	chr1:32494732-32494733	Non-Epi	116.156	89.5839	0.371107	BIN67
ATAC	chr1:32651037-32651038	Non-Epi	2053.45	2062.11	-0.00606244	BIN67
ATAC	chr1:32760400-32760401	Non-Epi	216.054	154.83	0.478077	BIN67
ATAC	chr1:32795999-32796000	Non-Epi	95.3276	48.22	0.968704	BIN67
ATAC	chr1:32886577-32886578	Non-Epi	263.601	292.634	-0.150206	BIN67
ATAC	chr1:32989281-32989282	Non-Epi	160.234	65.084	1.28678	BIN67
ATAC	chr1:33048060-33048061	Non-Epi	134.763	108.04	0.31623	BIN67
ATAC	chr1:33188964-33188965	Non-Epi	141.013	103.621	0.440852	BIN67
ATAC	chr1:33458607-33458608	Non-Epi	107.431	52.9803	1.00627	BIN67
ATAC	chr1:33460257-33460258	Non-Epi	146.36	102.403	0.511077	BIN67
ATAC	chr1:33763404-33763405	Non-Epi	163.052	95.8227	0.760738	BIN67
ATAC	chr1:34101077-34101078	Non-Epi	115.668	135.123	-0.2225	BIN67
ATAC	chr1:3452215-3452216	Non-Epi	126.092	115.432	0.12638	BIN67
ATAC	chr1:34763524-34763525	Non-Epi	290.047	82.7928	1.79636	BIN67
ATAC	chr1:34806476-34806477	Non-Epi	116.807	71.0302	0.709745	BIN67
ATAC	chr1:35031857-35031858	Non-Epi	1032.71	1032.65	7.43079e-05	BIN67
ATAC	chr1:35177457-35177458	Non-Epi	83.9287	81.883	0.0351751	BIN67
ATAC	chr1:35268952-35268953	Non-Epi	1062.86	965.343	0.138695	BIN67
ATAC	chr1:35641736-35641737	Non-Epi	826.822	764.306	0.113283	BIN67
ATAC	chr1:35718888-35718889	Non-Epi	499.923	542.15	-0.116762	BIN67
ATAC	chr1:36150870-36150871	Non-Epi	782.744	653.115	0.260839	BIN67
ATAC	chr1:36155689-36155690	Non-Epi	528.808	367.467	0.523936	BIN67
ATAC	chr1:36290960-36290961	Non-Epi	83.459	92.9307	-0.153346	BIN67
ATAC	chr1:36300060-36300061	Non-Epi	191.667	124.937	0.613409	BIN67
ATAC	chr1:36373726-36373727	Non-Epi	201.422	135.692	0.566435	BIN67
ATAC	chr1:36374766-36374767	Non-Epi	234.444	128.803	0.859057	BIN67
ATAC	chr1:36386401-36386402	Non-Epi	1857.67	1591.5	0.222972	BIN67
ATAC	chr1:36386739-36386740	Non-Epi	742.316	476.644	0.63804	BIN67
ATAC	chr1:36387235-36387236	Non-Epi	481.786	322.902	0.575828	BIN67
ATAC	chr1:36450654-36450655	Non-Epi	1025.5	918.292	0.159136	BIN67
ATAC	chr1:37472018-37472019	Non-Epi	235.817	163.799	0.523068	BIN67
ATAC	chr1:37499130-37499131	Non-Epi	203.047	89.3565	1.1752	BIN67
ATAC	chr1:37515014-37515015	Non-Epi	561.669	528.081	0.0887983	BIN67
ATAC	chr1:37534590-37534591	Non-Epi	126.453	72.7849	0.788569	BIN67
ATAC	chr1:38451628-38451629	Non-Epi	86.819	115.026	-0.401845	BIN67
ATAC	chr1:38873374-38873375	Non-Epi	1478.38	1389.48	0.0894133	BIN67
ATAC	chr1:38961746-38961747	Non-Epi	126.525	113.986	0.149321	BIN67
ATAC	chr1:38992341-38992342	Non-Epi	238.707	232.554	0.0375149	BIN67
ATAC	chr1:39026414-39026415	Non-Epi	585.875	540.526	0.116023	BIN67
ATAC	chr1:39084114-39084115	Non-Epi	96.8991	97.3173	-0.00614885	BIN67
ATAC	chr1:39103582-39103583	Non-Epi	261.758	206.69	0.339304	BIN67
ATAC	chr1:39133283-39133284	Non-Epi	313.025	292.602	0.0970197	BIN67
ATAC	chr1:39142624-39142625	Non-Epi	222.413	237.104	-0.091877	BIN67
ATAC	chr1:39149753-39149754	Non-Epi	117.71	159.867	-0.438429	BIN67
ATAC	chr1:39154848-39154849	Non-Epi	250.233	213.091	0.230799	BIN67
ATAC	chr1:39158864-39158865	Non-Epi	260.566	274.178	-0.0731938	BIN67
ATAC	chr1:39178708-39178709	Non-Epi	385.212	356.776	0.110336	BIN67
ATAC	chr1:39183889-39183890	Non-Epi	224.526	192.311	0.222369	BIN67
ATAC	chr1:39184032-39184033	Non-Epi	229.35	195.09	0.232313	BIN67
ATAC	chr1:39185895-39185896	Non-Epi	190.221	137.203	0.468457	BIN67
ATAC	chr1:39191896-39191897	Non-Epi	383.333	323.276	0.245137	BIN67
ATAC	chr1:39192060-39192061	Non-Epi	388.03	326.882	0.246703	BIN67
ATAC	chr1:39192250-39192251	Non-Epi	385.682	306.087	0.3325	BIN67
ATAC	chr1:39192374-39192375	Non-Epi	350.853	256.729	0.449115	BIN67
ATAC	chr1:39214360-39214361	Non-Epi	356.417	295.526	0.269448	BIN67
ATAC	chr1:39216594-39216595	Non-Epi	76.2331	121.98	-0.671129	BIN67
ATAC	chr1:39392085-39392086	Non-Epi	162.583	130.46	0.315389	BIN67
ATAC	chr1:39398551-39398552	Non-Epi	368.322	299.198	0.298963	BIN67
ATAC	chr1:39398782-39398783	Non-Epi	359.199	297.541	0.270865	BIN67
ATAC	chr1:39406562-39406563	Non-Epi	178.082	184.432	-0.0502685	BIN67
ATAC	chr1:39574796-39574797	Non-Epi	299.26	241.458	0.308481	BIN67
ATAC	chr1:39606542-39606543	Non-Epi	226.17	200.938	0.169859	BIN67
ATAC	chr1:39800003-39800004	Non-Epi	180.485	150.736	0.258282	BIN67
ATAC	chr1:40040342-40040343	Non-Epi	1695.12	1588.76	0.0934312	BIN67
ATAC	chr1:40162927-40162928	Non-Epi	220.462	171.483	0.360603	BIN67
ATAC	chr1:40392215-40392216	Non-Epi	110.195	71.404	0.618949	BIN67
ATAC	chr1:40531506-40531507	Non-Epi	972.027	850.837	0.191902	BIN67
ATAC	chr1:40709038-40709039	Non-Epi	687.037	690.645	-0.00754473	BIN67
ATAC	chr1:40711575-40711576	Non-Epi	269.435	154.912	0.794554	BIN67
ATAC	chr1:40849394-40849395	Non-Epi	125.694	121.46	0.0490442	BIN67
ATAC	chr1:40877824-40877825	Non-Epi	123.129	97.5448	0.332991	BIN67
ATAC	chr1:40967797-40967798	Non-Epi	229.386	94.4091	1.27185	BIN67
ATAC	chr1:40979821-40979822	Non-Epi	1471.77	1366.93	0.10654	BIN67
ATAC	chr1:41109673-41109674	Non-Epi	179.328	86.6595	1.04064	BIN67
ATAC	chr1:41109878-41109879	Non-Epi	187.584	96.8949	0.945902	BIN67
ATAC	chr1:41432923-41432924	Non-Epi	386.278	221.864	0.797205	BIN67
ATAC	chr1:41504385-41504386	Non-Epi	224.816	120.144	0.898425	BIN67
ATAC	chr1:41665316-41665317	Non-Epi	179.889	138.486	0.374978	BIN67
ATAC	chr1:41900830-41900831	Non-Epi	111.821	144.595	-0.36793	BIN67
ATAC	chr1:41902368-41902369	Non-Epi	111.64	94.1979	0.242716	BIN67
ATAC	chr1:41955669-41955670	Non-Epi	203.987	93.8892	1.11121	BIN67
ATAC	chr1:41957699-41957700	Non-Epi	151.816	85.9934	0.812817	BIN67
ATAC	chr1:42456789-42456790	Non-Epi	568.515	531.216	0.0977202	BIN67
ATAC	chr1:42530160-42530161	Non-Epi	137.653	54.7511	1.31441	BIN67
ATAC	chr1:42817509-42817510	Non-Epi	1058.75	1051.94	0.00931111	BIN67
ATAC	chr1:42924425-42924426	Non-Epi	986.243	1007.37	-0.0305516	BIN67
ATAC	chr1:42925616-42925617	Non-Epi	137.978	136.764	0.0126591	BIN67
ATAC	chr1:42941199-42941200	Non-Epi	257.639	90.9323	1.4923	BIN67
ATAC	chr1:42959089-42959090	Non-Epi	763.813	634.658	0.266855	BIN67
ATAC	chr1:42967178-42967179	Non-Epi	174.83	123.149	0.502106	BIN67
ATAC	chr1:42967388-42967389	Non-Epi	172.41	120.615	0.511864	BIN67
ATAC	chr1:42999523-42999524	Non-Epi	102.319	71.1765	0.517499	BIN67
ATAC	chr1:43022051-43022052	Non-Epi	194.756	94.7178	1.0322	BIN67
ATAC	chr1:43294752-43294753	Non-Epi	149.142	116.878	0.349034	BIN67
ATAC	chr1:43303193-43303194	Non-Epi	131.692	127.633	0.0448134	BIN67
ATAC	chr1:43358539-43358540	Non-Epi	1204.74	1126.53	0.0967544	BIN67
ATAC	chr1:43472900-43472901	Non-Epi	99.5366	66.1238	0.582826	BIN67
ATAC	chr1:43523317-43523318	Non-Epi	172.897	104.612	0.719462	BIN67
ATAC	chr1:43650122-43650123	Non-Epi	3418.17	3190.19	0.0995515	BIN67
ATAC	chr1:43688693-43688694	Non-Epi	174.776	70.6728	1.29424	BIN67
ATAC	chr1:43708055-43708056	Non-Epi	505.902	504.539	0.00388548	BIN67
ATAC	chr1:43711816-43711817	Non-Epi	162.799	141.931	0.196615	BIN67
ATAC	chr1:43730379-43730380	Non-Epi	87.9752	67.6022	0.375148	BIN67
ATAC	chr1:43822250-43822251	Non-Epi	120.311	90.6562	0.404407	BIN67
ATAC	chr1:43835633-43835634	Non-Epi	133.209	91.3061	0.539987	BIN67
ATAC	chr1:43868644-43868645	Non-Epi	92.5275	85.1648	0.118291	BIN67
ATAC	chr1:43946303-43946304	Non-Epi	1066.51	979.802	0.122209	BIN67
ATAC	chr1:43969829-43969830	Non-Epi	1130.13	1104.27	0.0333675	BIN67
ATAC	chr1:43974823-43974824	Non-Epi	1092.03	953.32	0.195788	BIN67
ATAC	chr1:44328011-44328012	Non-Epi	315.573	158.242	0.991314	BIN67
ATAC	chr1:44355153-44355154	Non-Epi	902.297	768.254	0.23174	BIN67
ATAC	chr1:44485628-44485629	Non-Epi	93.8282	86.2047	0.120911	BIN67
ATAC	chr1:44532143-44532144	Non-Epi	189.427	94.8641	0.990173	BIN67
ATAC	chr1:44673950-44673951	Non-Epi	1318.54	1209.89	0.123975	BIN67
ATAC	chr1:44674374-44674375	Non-Epi	2526.5	2425.92	0.0585851	BIN67
ATAC	chr1:44707442-44707443	Non-Epi	284.917	123.799	1.19599	BIN67
ATAC	chr1:44730927-44730928	Non-Epi	1280.46	1257.67	0.0258943	BIN67
ATAC	chr1:44731178-44731179	Non-Epi	1200.15	1135.28	0.0800923	BIN67
ATAC	chr1:44739798-44739799	Non-Epi	1060.83	891.323	0.250918	BIN67
ATAC	chr1:44800060-44800061	Non-Epi	3207.03	2601.74	0.301658	BIN67
ATAC	chr1:44807146-44807147	Non-Epi	354.647	207.794	0.768361	BIN67
ATAC	chr1:45303965-45303966	Non-Epi	1858.32	1625.88	0.192663	BIN67
ATAC	chr1:45340298-45340299	Non-Epi	1084.21	1028.83	0.0755596	BIN67
ATAC	chr1:45348399-45348400	Non-Epi	149.739	109.6	0.446701	BIN67
ATAC	chr1:45583617-45583618	Non-Epi	2020.52	1854	0.124021	BIN67
ATAC	chr1:45584763-45584764	Non-Epi	1453.36	1240.66	0.228118	BIN67
ATAC	chr1:45687186-45687187	Non-Epi	2592.76	2223.58	0.221511	BIN67
ATAC	chr1:45803082-45803083	Non-Epi	592.667	475.052	0.318537	BIN67
ATAC	chr1:45872276-45872277	Non-Epi	113.302	86.627	0.383402	BIN67
ATAC	chr1:45892362-45892363	Non-Epi	120.925	69.3406	0.793567	BIN67
ATAC	chr1:45929479-45929480	Non-Epi	157.344	134.847	0.221077	BIN67
ATAC	chr1:46042168-46042169	Non-Epi	86.3133	106.026	-0.293682	BIN67
ATAC	chr1:46132947-46132948	Non-Epi	3863.47	3536.63	0.127484	BIN67
ATAC	chr1:46183519-46183520	High-Epi	244.271	101.866	1.25361	BIN67
ATAC	chr1:46306526-46306527	Non-Epi	115.795	96.0501	0.267176	BIN67
ATAC	chr1:46340865-46340866	Non-Epi	1053.72	856.279	0.299017	BIN67
ATAC	chr1:4650639-4650640	Non-Epi	168.923	64.4341	1.37677	BIN67
ATAC	chr1:46604333-46604334	Non-Epi	935.157	844.127	0.147582	BIN67
ATAC	chr1:46611941-46611942	Non-Epi	235.04	186.463	0.332429	BIN67
ATAC	chr1:46719263-46719264	Non-Epi	1031.66	973.873	0.0830773	BIN67
ATAC	chr1:46757199-46757200	Non-Epi	235.13	94.6529	1.3037	BIN67
ATAC	chr1:47314361-47314362	Non-Epi	2311.4	2315.03	-0.00226539	BIN67
ATAC	chr1:47334321-47334322	Non-Epi	1282.79	1094.63	0.22865	BIN67
ATAC	chr1:47334841-47334842	Non-Epi	570.286	527.674	0.111832	BIN67
ATAC	chr1:47555156-47555157	Non-Epi	188.812	145.797	0.37075	BIN67
ATAC	chr1:47569939-47569940	Non-Epi	266.906	147.357	0.852656	BIN67
ATAC	chr1:47697060-47697061	Non-Epi	255.616	118.275	1.10531	BIN67
ATAC	chr1:48007257-48007258	Non-Epi	197.52	121.102	0.701191	BIN67
ATAC	chr1:48070268-48070269	Non-Epi	191.269	83.6702	1.1832	BIN67
ATAC	chr1:48494688-48494689	Non-Epi	303.56	129.583	1.22176	BIN67
ATAC	chr1:48878763-48878764	Non-Epi	190.8	118.73	0.679811	BIN67
ATAC	chr1:50048089-50048090	Non-Epi	322.744	409.123	-0.341201	BIN67
ATAC	chr1:50603600-50603601	Non-Epi	186.97	93.7431	0.988409	BIN67
ATAC	chr1:51063253-51063254	Non-Epi	237.533	100.29	1.23569	BIN67
ATAC	chr1:51214566-51214567	Non-Epi	108.099	105.863	0.0298776	BIN67
ATAC	chr1:51558630-51558631	Non-Epi	285.603	109.177	1.37923	BIN67
ATAC	chr1:51569715-51569716	Non-Epi	255.706	135.659	0.909533	BIN67
ATAC	chr1:51622377-51622378	Non-Epi	138.556	115.839	0.256332	BIN67
ATAC	chr1:51622619-51622620	Non-Epi	137.202	125.343	0.12943	BIN67
ATAC	chr1:51661316-51661317	Non-Epi	136.714	73.4348	0.887625	BIN67
ATAC	chr1:51898356-51898357	Non-Epi	91.299	71.9076	0.340247	BIN67
ATAC	chr1:52055384-52055385	Non-Epi	914.87	892.785	0.0352152	BIN67
ATAC	chr1:52286859-52286860	Non-Epi	72.2047	100.242	-0.467796	BIN67
ATAC	chr1:52404815-52404816	Non-Epi	872.887	788.043	0.147342	BIN67
ATAC	chr1:52670069-52670070	Non-Epi	91.0462	91.2085	-0.00254288	BIN67
ATAC	chr1:52703338-52703339	Non-Epi	508.919	410	0.31113	BIN67
ATAC	chr1:53089667-53089668	Non-Epi	115.343	75.4331	0.606117	BIN67
ATAC	chr1:53382020-53382021	Non-Epi	100.62	105.766	-0.0712558	BIN67
ATAC	chr1:53413534-53413535	Non-Epi	195.135	148.884	0.388	BIN67
ATAC	chr1:53838413-53838414	Non-Epi	2086.62	1715.63	0.282281	BIN67
ATAC	chr1:53896849-53896850	Non-Epi	132.107	111.728	0.239743	BIN67
ATAC	chr1:53945690-53945691	Non-Epi	2116.1	1839.77	0.201782	BIN67
ATAC	chr1:54158314-54158315	Non-Epi	267.394	97.9346	1.4398	BIN67
ATAC	chr1:54229644-54229645	Non-Epi	266.527	159.834	0.734108	BIN67
ATAC	chr1:54764699-54764700	Non-Epi	1904.11	1892.04	0.00917485	BIN67
ATAC	chr1:54811365-54811366	Non-Epi	145.15	127.942	0.180726	BIN67
ATAC	chr1:54882448-54882449	Non-Epi	125.767	128.251	-0.028	BIN67
ATAC	chr1:55081183-55081184	Non-Epi	120.618	74.4259	0.689228	BIN67
ATAC	chr1:55179141-55179142	Non-Epi	73.0176	97.9021	-0.418134	BIN67
ATAC	chr1:55280651-55280652	Non-Epi	85.988	85.2786	0.0118144	BIN67
ATAC	chr1:55429375-55429376	Non-Epi	780.757	158.73	2.29109	BIN67
ATAC	chr1:5611827-5611828	Non-Epi	209.226	75.5468	1.45752	BIN67
ATAC	chr1:5612071-5612072	Non-Epi	224.129	74.1984	1.58198	BIN67
ATAC	chr1:56457025-56457026	Non-Epi	95.2914	89.519	0.0891863	BIN67
ATAC	chr1:56579623-56579624	Non-Epi	987.273	958.487	0.0426468	BIN67
ATAC	chr1:56688758-56688759	Non-Epi	367.689	164.773	1.15319	BIN67
ATAC	chr1:58412235-58412236	Non-Epi	344.494	123.231	1.47564	BIN67
ATAC	chr1:58574054-58574055	Low-Epi	223.063	125.359	0.826377	BIN67
ATAC	chr1:58584720-58584721	Low-Epi	203.77	102.354	0.986415	BIN67
ATAC	chr1:58727562-58727563	Non-Epi	261.902	123.994	1.07266	BIN67
ATAC	chr1:58755568-58755569	Non-Epi	262.769	103.913	1.33008	BIN67
ATAC	chr1:58816067-58816068	Non-Epi	256.916	272.44	-0.0843207	BIN67
ATAC	chr1:58823559-58823560	Non-Epi	137.364	77.3339	0.82076	BIN67
ATAC	chr1:58849070-58849071	Non-Epi	344.494	104.791	1.70745	BIN67
ATAC	chr1:58883458-58883459	Non-Epi	212.55	101.671	1.05654	BIN67
ATAC	chr1:58933073-58933074	Non-Epi	179.599	103.134	0.794357	BIN67
ATAC	chr1:59128429-59128430	Non-Epi	215.53	113.726	0.916371	BIN67
ATAC	chr1:59143305-59143306	Non-Epi	229.422	148.657	0.622622	BIN67
ATAC	chr1:59151199-59151200	Non-Epi	380.407	158.73	1.2557	BIN67
ATAC	chr1:59484363-59484364	Non-Epi	80.7131	86.3671	-0.0965223	BIN67
ATAC	chr1:59499026-59499027	Non-Epi	145.024	102.549	0.495892	BIN67
ATAC	chr1:59499679-59499680	Non-Epi	160.939	87.943	0.864495	BIN67
ATAC	chr1:59596256-59596257	Non-Epi	107.449	60.1775	0.825943	BIN67
ATAC	chr1:59596699-59596700	Non-Epi	118.577	97.0574	0.28624	BIN67
ATAC	chr1:59707301-59707302	Non-Epi	143.055	71.9238	0.982152	BIN67
ATAC	chr1:59730422-59730423	Non-Epi	145.457	97.0249	0.579259	BIN67
ATAC	chr1:59731317-59731318	Non-Epi	187.349	101.444	0.878575	BIN67
ATAC	chr1:59814586-59814587	Non-Epi	898.503	769.538	0.223263	BIN67
ATAC	chr1:60281700-60281701	Non-Epi	423.437	380.983	0.152041	BIN67
ATAC	chr1:61078137-61078138	Non-Epi	792.752	766.907	0.0477574	BIN67
ATAC	chr1:61079794-61079795	Non-Epi	577.276	528.828	0.126234	BIN67
ATAC	chr1:61141645-61141646	Non-Epi	133.86	146.463	-0.128898	BIN67
ATAC	chr1:61184550-61184551	Non-Epi	635.697	627.12	0.019568	BIN67
ATAC	chr1:61242067-61242068	Non-Epi	2103.56	2075.46	0.0193965	BIN67
ATAC	chr1:61244238-61244239	Non-Epi	864.469	827.409	0.0631393	BIN67
ATAC	chr1:61271091-61271092	Non-Epi	287.175	238.029	0.269756	BIN67
ATAC	chr1:61273552-61273553	Non-Epi	295.358	278.305	0.0855011	BIN67
ATAC	chr1:61277180-61277181	Non-Epi	291.023	223.879	0.376934	BIN67
ATAC	chr1:61279845-61279846	Non-Epi	301.229	278.061	0.115062	BIN67
ATAC	chr1:61282431-61282432	Non-Epi	266.003	293.284	-0.140355	BIN67
ATAC	chr1:61286263-61286264	Non-Epi	309.846	291.189	0.0893012	BIN67
ATAC	chr1:61318666-61318667	Non-Epi	616.513	520.867	0.242786	BIN67
ATAC	chr1:61318761-61318762	Non-Epi	620.758	542.573	0.19388	BIN67
ATAC	chr1:61338251-61338252	Non-Epi	747.23	644.634	0.212764	BIN67
ATAC	chr1:61725321-61725322	Non-Epi	976.235	856.587	0.188422	BIN67
ATAC	chr1:62122179-62122180	Non-Epi	119.751	87.488	0.448481	BIN67
ATAC	chr1:62230965-62230966	Non-Epi	386.766	94.6366	2.01955	BIN67
ATAC	chr1:62436548-62436549	Non-Epi	3876.29	3346	0.212183	BIN67
ATAC	chr1:6246260-6246261	Non-Epi	647.079	594.952	0.120973	BIN67
ATAC	chr1:62622068-62622069	Non-Epi	159.222	63.0369	1.3231	BIN67
ATAC	chr1:62688532-62688533	Non-Epi	802.579	700.555	0.195884	BIN67
ATAC	chr1:62689737-62689738	Non-Epi	272.29	213.465	0.349691	BIN67
ATAC	chr1:62725374-62725375	Non-Epi	257.82	267.225	-0.0514951	BIN67
ATAC	chr1:64007023-64007024	Non-Epi	204.204	105.311	0.948771	BIN67
ATAC	chr1:64172453-64172454	Non-Epi	150.443	49.7309	1.57784	BIN67
ATAC	chr1:64184408-64184409	Non-Epi	113.663	73.1748	0.628401	BIN67
ATAC	chr1:64343603-64343604	Non-Epi	513.038	136.472	1.90274	BIN67
ATAC	chr1:64343758-64343759	Non-Epi	506.282	130.525	1.94745	BIN67
ATAC	chr1:64344518-64344519	Non-Epi	122.515	55.6934	1.12343	BIN67
ATAC	chr1:64883308-64883309	Non-Epi	88.3364	113.044	-0.35227	BIN67
ATAC	chr1:64898296-64898297	Non-Epi	473.404	131.24	1.84295	BIN67
ATAC	chr1:65148975-65148976	Non-Epi	614.562	612.823	0.00408045	BIN67
ATAC	chr1:65177567-65177568	Non-Epi	123.508	109.34	0.17429	BIN67
ATAC	chr1:65254186-65254187	Non-Epi	719.626	749.457	-0.058519	BIN67
ATAC	chr1:65420436-65420437	Non-Epi	3303.31	3268.99	0.0150665	BIN67
ATAC	chr1:65425895-65425896	Non-Epi	333.385	155.643	1.09403	BIN67
ATAC	chr1:6601352-6601353	Non-Epi	532.151	448.7	0.245581	BIN67
ATAC	chr1:6613554-6613555	Non-Epi	2493.73	2166	0.203182	BIN67
ATAC	chr1:66543147-66543148	Non-Epi	227.724	86.692	1.38309	BIN67
ATAC	chr1:66938765-66938766	Non-Epi	159.963	151.094	0.0817686	BIN67
ATAC	chr1:66944620-66944621	Non-Epi	358.043	107.878	1.72145	BIN67
ATAC	chr1:66944851-66944852	Non-Epi	372.314	96.1963	1.94142	BIN67
ATAC	chr1:67347972-67347973	Non-Epi	259.193	186.771	0.470604	BIN67
ATAC	chr1:67390339-67390340	Non-Epi	138.882	71.3227	0.951686	BIN67
ATAC	chr1:67404447-67404448	Non-Epi	185.489	94.9615	0.958559	BIN67
ATAC	chr1:67420288-67420289	Non-Epi	69.1517	67.1961	0.0407903	BIN67
ATAC	chr1:67552605-67552606	Non-Epi	210.364	133.304	0.654229	BIN67
ATAC	chr1:67570424-67570425	Non-Epi	376.938	126.886	1.56329	BIN67
ATAC	chr1:67646903-67646904	Non-Epi	212.08	86.9519	1.27661	BIN67
ATAC	chr1:67683095-67683096	Non-Epi	371.772	167.828	1.14274	BIN67
ATAC	chr1:67683388-67683389	Non-Epi	313.423	165.618	0.91616	BIN67
ATAC	chr1:67685344-67685345	Non-Epi	1778.47	1548.47	0.199677	BIN67
ATAC	chr1:67686802-67686803	Non-Epi	481.064	344.331	0.481242	BIN67
ATAC	chr1:67690327-67690328	Non-Epi	118.27	98.081	0.267548	BIN67
ATAC	chr1:67713517-67713518	Non-Epi	207.744	115.79	0.837823	BIN67
ATAC	chr1:67725107-67725108	Non-Epi	210.671	50.2021	2.04755	BIN67
ATAC	chr1:67750065-67750066	Non-Epi	270.881	141.589	0.931106	BIN67
ATAC	chr1:6785249-6785250	Non-Epi	3434.27	3134.82	0.131578	BIN67
ATAC	chr1:68384576-68384577	Non-Epi	479.149	129.421	1.88031	BIN67
ATAC	chr1:68497091-68497092	Non-Epi	1985.44	2186.2	-0.138898	BIN67
ATAC	chr1:70221643-70221644	Non-Epi	1336.81	1201.88	0.153381	BIN67
ATAC	chr1:71081154-71081155	Non-Epi	1166.08	1298.76	-0.15534	BIN67
ATAC	chr1:7299402-7299403	Non-Epi	179.78	102.126	0.809824	BIN67
ATAC	chr1:7301098-7301099	Non-Epi	126.706	83.1828	0.60123	BIN67
ATAC	chr1:7401923-7401924	Non-Epi	251.334	89.5514	1.47853	BIN67
ATAC	chr1:7471164-7471165	Non-Epi	194.413	87.7968	1.13794	BIN67
ATAC	chr1:7549652-7549653	Non-Epi	116.554	68.4308	0.759669	BIN67
ATAC	chr1:75765996-75765997	Non-Epi	157.019	62.582	1.3134	BIN67
ATAC	chr1:77322396-77322397	Non-Epi	252.689	92.4758	1.4404	BIN67
ATAC	chr1:77412264-77412265	Non-Epi	168.544	106.383	0.658894	BIN67
ATAC	chr1:77474000-77474001	Non-Epi	198.712	98.4545	1.00581	BIN67
ATAC	chr1:77537152-77537153	Non-Epi	260.927	116.228	1.15984	BIN67
ATAC	chr1:77539837-77539838	Non-Epi	464.823	166.284	1.47748	BIN67
ATAC	chr1:77544073-77544074	Non-Epi	130.716	111.679	0.225211	BIN67
ATAC	chr1:77605510-77605511	Non-Epi	374.843	158.892	1.23303	BIN67
ATAC	chr1:77759570-77759571	Non-Epi	793.945	794.298	-0.000640925	BIN67
ATAC	chr1:7784001-7784002	Non-Epi	2513.36	2254.46	0.156768	BIN67
ATAC	chr1:77888548-77888549	Non-Epi	506.607	512.809	-0.0175194	BIN67
ATAC	chr1:78003353-78003354	Non-Epi	163.125	157.446	0.0507987	BIN67
ATAC	chr1:78003972-78003973	Non-Epi	234.263	218.745	0.0984482	BIN67
ATAC	chr1:78114340-78114341	Non-Epi	299.332	293.252	0.0295079	BIN67
ATAC	chr1:78340089-78340090	Non-Epi	154.237	99.3156	0.629923	BIN67
ATAC	chr1:8026241-8026242	Non-Epi	2162.89	1778.03	0.282534	BIN67
ATAC	chr1:8078555-8078556	Non-Epi	110.285	71.8101	0.61205	BIN67
ATAC	chr1:8089893-8089894	Non-Epi	96.5921	97.5448	-0.0140159	BIN67
ATAC	chr1:8090410-8090411	Non-Epi	97.0076	62.0621	0.636119	BIN67
ATAC	chr1:8096782-8096783	Non-Epi	86.9636	82.1105	0.0818769	BIN67
ATAC	chr1:8097148-8097149	Non-Epi	81.219	64.3691	0.330863	BIN67
ATAC	chr1:8133974-8133975	Non-Epi	70.0911	69.4381	0.013313	BIN67
ATAC	chr1:81707017-81707018	Non-Epi	273.825	251.222	0.123821	BIN67
ATAC	chr1:8182523-8182524	Non-Epi	111.929	74.6695	0.577632	BIN67
ATAC	chr1:82565463-82565464	Non-Epi	897.636	638.851	0.490002	BIN67
ATAC	chr1:827385-827386	Non-Epi	466.07	357.507	0.381636	BIN67
ATAC	chr1:82920806-82920807	Non-Epi	557.839	547.317	0.0274221	BIN67
ATAC	chr1:83960065-83960066	Non-Epi	116.156	92.1184	0.331295	BIN67
ATAC	chr1:84077844-84077845	Non-Epi	1059.1	912.606	0.214555	BIN67
ATAC	chr1:84103625-84103626	Non-Epi	207.925	114.376	0.856639	BIN67
ATAC	chr1:84146476-84146477	Non-Epi	69.7298	88.3167	-0.336611	BIN67
ATAC	chr1:84353935-84353936	Non-Epi	118.776	110.071	0.108853	BIN67
ATAC	chr1:84365699-84365700	Non-Epi	425.009	145.716	1.53786	BIN67
ATAC	chr1:84365891-84365892	Non-Epi	410.503	140.241	1.54274	BIN67
ATAC	chr1:84402534-84402535	Non-Epi	159.186	115.709	0.456842	BIN67
ATAC	chr1:84506243-84506244	Non-Epi	2053.67	1846.53	0.15331	BIN67
ATAC	chr1:84698672-84698673	Non-Epi	162.438	105.051	0.623989	BIN67
ATAC	chr1:84834756-84834757	Non-Epi	247.378	124.872	0.980587	BIN67
ATAC	chr1:84887833-84887834	Non-Epi	98.236	48.7886	0.995047	BIN67
ATAC	chr1:85201253-85201254	Non-Epi	1249.77	1142.87	0.128896	BIN67
ATAC	chr1:85278815-85278816	Non-Epi	299.423	180.987	0.723155	BIN67
ATAC	chr1:85289873-85289874	Non-Epi	233.216	127	0.871694	BIN67
ATAC	chr1:85328911-85328912	Non-Epi	277.348	114.311	1.27135	BIN67
ATAC	chr1:85344163-85344164	Non-Epi	129.867	135.611	-0.0619658	BIN67
ATAC	chr1:85407255-85407256	Non-Epi	136.118	65.8801	1.03577	BIN67
ATAC	chr1:85495766-85495767	Non-Epi	254.749	91.2736	1.47074	BIN67
ATAC	chr1:85551159-85551160	Non-Epi	410.412	148.949	1.45611	BIN67
ATAC	chr1:8555538-8555539	Non-Epi	81.7248	78.7312	0.0531754	BIN67
ATAC	chr1:85607400-85607401	Non-Epi	509.064	145.895	1.7959	BIN67
ATAC	chr1:85613229-85613230	Non-Epi	290.68	168.283	0.78495	BIN67
ATAC	chr1:85623067-85623068	Non-Epi	281.521	88.7228	1.65481	BIN67
ATAC	chr1:86422065-86422066	Non-Epi	182.725	92.5245	0.974129	BIN67
ATAC	chr1:86704348-86704349	Non-Epi	1695.77	1496.48	0.180257	BIN67
ATAC	chr1:86773714-86773715	Non-Epi	136.533	91.9884	0.564657	BIN67
ATAC	chr1:86793217-86793218	Non-Epi	511.467	133.58	1.929	BIN67
ATAC	chr1:86793383-86793384	Non-Epi	469.014	111.371	2.06444	BIN67
ATAC	chr1:86860246-86860247	Non-Epi	77.1725	51.3719	0.577869	BIN67
ATAC	chr1:8712334-8712335	Non-Epi	543.531	431.933	0.33087	BIN67
ATAC	chr1:8712839-8712840	Non-Epi	642.183	538.251	0.254271	BIN67
ATAC	chr1:8713134-8713135	Non-Epi	383.08	333.024	0.201458	BIN67
ATAC	chr1:87141134-87141135	Non-Epi	247.812	116.066	1.08773	BIN67
ATAC	chr1:87226299-87226300	Non-Epi	390.993	126.366	1.62184	BIN67
ATAC	chr1:87751699-87751700	Non-Epi	73.7582	80.7782	-0.129484	BIN67
ATAC	chr1:87806009-87806010	Non-Epi	176.799	113.32	0.63717	BIN67
ATAC	chr1:87806308-87806309	Non-Epi	166.123	129.778	0.353791	BIN67
ATAC	chr1:8818698-8818699	Non-Epi	213.85	150.086	0.507958	BIN67
ATAC	chr1:88611110-88611111	Non-Epi	95.3817	76.0342	0.32326	BIN67
ATAC	chr1:8873885-8873886	Non-Epi	178.931	135.01	0.403737	BIN67
ATAC	chr1:88763250-88763251	Non-Epi	107.846	118.113	-0.130038	BIN67
ATAC	chr1:88773924-88773925	Non-Epi	384.67	140.501	1.44656	BIN67
ATAC	chr1:88774397-88774398	Non-Epi	411.948	147.097	1.47942	BIN67
ATAC	chr1:8880024-8880025	Non-Epi	168.255	186.251	-0.14578	BIN67
ATAC	chr1:88985378-88985379	Non-Epi	459.458	195.967	1.22512	BIN67
ATAC	chr1:88992870-88992871	Non-Epi	3058.72	2843.16	0.105395	BIN67
ATAC	chr1:89546841-89546842	Non-Epi	155.646	67.4073	1.19528	BIN67
ATAC	chr1:89808510-89808511	Non-Epi	265.551	112.752	1.22853	BIN67
ATAC	chr1:8986188-8986189	Non-Epi	115.759	75.6118	0.607891	BIN67
ATAC	chr1:89885273-89885274	Non-Epi	129.795	116.878	0.15001	BIN67
ATAC	chr1:89906782-89906783	Non-Epi	151.888	86.432	0.806244	BIN67
ATAC	chr1:89953346-89953347	Non-Epi	299.838	85.6197	1.79622	BIN67
ATAC	chr1:89975338-89975339	Non-Epi	291.312	99.9817	1.53341	BIN67
ATAC	chr1:89994871-89994872	Non-Epi	1701.86	1550.35	0.134434	BIN67
ATAC	chr1:89998367-89998368	Non-Epi	100.512	107.813	-0.100195	BIN67
ATAC	chr1:90224496-90224497	Non-Epi	102.355	116.976	-0.190887	BIN67
ATAC	chr1:90387156-90387157	Non-Epi	144.012	121.525	0.243097	BIN67
ATAC	chr1:90403400-90403401	Non-Epi	334.017	113.076	1.55423	BIN67
ATAC	chr1:90737473-90737474	Non-Epi	104.649	78.3413	0.413135	BIN67
ATAC	chr1:90974321-90974322	Non-Epi	193.835	114.896	0.749417	BIN67
ATAC	chr1:91098519-91098520	Non-Epi	87.5778	48.3337	0.844371	BIN67
ATAC	chr1:91121487-91121488	Non-Epi	350.239	159.607	1.12892	BIN67
ATAC	chr1:91569705-91569706	Non-Epi	200.789	106.334	0.910741	BIN67
ATAC	chr1:9163943-9163944	Non-Epi	197.646	91.0461	1.10977	BIN67
ATAC	chr1:9164194-9164195	Non-Epi	201.241	101.899	0.974848	BIN67
ATAC	chr1:91650997-91650998	Non-Epi	272.019	113.093	1.25879	BIN67
ATAC	chr1:92310353-92310354	Non-Epi	98.254	102.175	-0.0558965	BIN67
ATAC	chr1:92502489-92502490	Non-Epi	70.3079	60.5024	0.213418	BIN67
ATAC	chr1:9290010-9290011	Non-Epi	163.305	143.458	0.18573	BIN67
ATAC	chr1:93257840-93257841	Non-Epi	31.9745	16.734	0.894832	BIN67
ATAC	chr1:93325029-93325030	Non-Epi	155.862	88.7715	0.80517	BIN67
ATAC	chr1:93331684-93331685	Non-Epi	74.7518	64.9216	0.20053	BIN67
ATAC	chr1:93338361-93338362	Non-Epi	137.382	110.867	0.306874	BIN67
ATAC	chr1:93338729-93338730	Non-Epi	151.924	133.612	0.184007	BIN67
ATAC	chr1:93537857-93537858	Non-Epi	115.777	151.565	-0.385668	BIN67
ATAC	chr1:93567614-93567615	Non-Epi	123.129	111.582	0.140867	BIN67
ATAC	chr1:93585312-93585313	Non-Epi	197.809	133.32	0.565708	BIN67
ATAC	chr1:93615972-93615973	Non-Epi	83.9287	86.3346	-0.0403021	BIN67
ATAC	chr1:93625813-93625814	Non-Epi	116.12	109.502	0.0839114	BIN67
ATAC	chr1:93662111-93662112	Non-Epi	98.7418	54.475	0.846361	BIN67
ATAC	chr1:93664714-93664715	Non-Epi	141.7	76.1642	0.886978	BIN67
ATAC	chr1:93693215-93693216	Non-Epi	206.57	128.186	0.68415	BIN67
ATAC	chr1:93701804-93701805	Non-Epi	232.059	106.285	1.11924	BIN67
ATAC	chr1:93738392-93738393	Non-Epi	144.771	102.256	0.49747	BIN67
ATAC	chr1:93780186-93780187	Non-Epi	161.39	49.3573	1.68919	BIN67
ATAC	chr1:93839796-93839797	Non-Epi	107.449	90.4612	0.245784	BIN67
ATAC	chr1:93845783-93845784	Non-Epi	380.84	317.216	0.262964	BIN67
ATAC	chr1:93846536-93846537	Non-Epi	934.054	983.961	-0.0750176	BIN67
ATAC	chr1:93880181-93880182	Non-Epi	127.573	136.098	-0.0926189	BIN67
ATAC	chr1:94022933-94022934	Non-Epi	171.814	149.388	0.200529	BIN67
ATAC	chr1:94045890-94045891	Non-Epi	340.701	381.634	-0.163231	BIN67
ATAC	chr1:94055770-94055771	Non-Epi	115.434	96.0176	0.263189	BIN67
ATAC	chr1:94068376-94068377	Non-Epi	280.545	123.929	1.17225	BIN67
ATAC	chr1:94142164-94142165	Non-Epi	98.6334	129.096	-0.384872	BIN67
ATAC	chr1:94258851-94258852	Non-Epi	183.538	100.404	0.863797	BIN67
ATAC	chr1:94259086-94259087	Non-Epi	184.621	87.6668	1.0659	BIN67
ATAC	chr1:94265418-94265419	Non-Epi	121.07	96.375	0.326083	BIN67
ATAC	chr1:94266013-94266014	Non-Epi	115.921	100.274	0.207271	BIN67
ATAC	chr1:94271084-94271085	Non-Epi	167.243	115.156	0.534484	BIN67
ATAC	chr1:94285333-94285334	Non-Epi	119.588	130.883	-0.129165	BIN67
ATAC	chr1:9429066-9429067	Non-Epi	1213.26	1019.28	0.251113	BIN67
ATAC	chr1:94300302-94300303	Non-Epi	219.631	91.566	1.25308	BIN67
ATAC	chr1:94325599-94325600	Non-Epi	283.724	116.375	1.27845	BIN67
ATAC	chr1:94325717-94325718	Non-Epi	302.078	122.776	1.29196	BIN67
ATAC	chr1:94326140-94326141	Non-Epi	248.39	113.889	1.11816	BIN67
ATAC	chr1:9442556-9442557	Non-Epi	76.3776	91.9234	-0.264127	BIN67
ATAC	chr1:94622959-94622960	Non-Epi	279.895	116.472	1.25771	BIN67
ATAC	chr1:94698712-94698713	Non-Epi	89.5649	93.7106	-0.0645738	BIN67
ATAC	chr1:94713885-94713886	Non-Epi	110.917	98.942	0.163272	BIN67
ATAC	chr1:94820507-94820508	Non-Epi	339.111	344.478	-0.0225876	BIN67
ATAC	chr1:94855300-94855301	Non-Epi	349.191	236.064	0.562868	BIN67
ATAC	chr1:94864077-94864078	Non-Epi	154.417	90.5262	0.763889	BIN67
ATAC	chr1:95003549-95003550	Non-Epi	102.644	62.7933	0.700156	BIN67
ATAC	chr1:95023975-95023976	Non-Epi	85.0848	37.6922	1.15372	BIN67
ATAC	chr1:95197981-95197982	Non-Epi	243.151	106.74	1.18022	BIN67
ATAC	chr1:96522303-96522304	Non-Epi	123.906	81.558	0.597361	BIN67
ATAC	chr1:97384345-97384346	Non-Epi	220.841	100.485	1.12826	BIN67
ATAC	chr1:9766934-9766935	Non-Epi	279.136	106.188	1.38599	BIN67
ATAC	chr1:97999597-97999598	Non-Epi	195.731	142.142	0.458782	BIN67
ATAC	chr1:98035530-98035531	Non-Epi	812.371	733.698	0.146762	BIN67
ATAC	chr1:98086825-98086826	Non-Epi	391.824	203.814	0.939568	BIN67
ATAC	chr1:98087278-98087279	Non-Epi	401.217	260.531	0.620993	BIN67
ATAC	chr1:98315326-98315327	Non-Epi	195.316	155.708	0.3251	BIN67
ATAC	chr1:98316549-98316550	Non-Epi	191.865	133.872	0.516	BIN67
ATAC	chr1:98324091-98324092	Non-Epi	724.413	614.887	0.236138	BIN67
ATAC	chr1:98326223-98326224	Non-Epi	251.913	163.506	0.620497	BIN67
ATAC	chr1:98450934-98450935	Non-Epi	113.194	93.6781	0.270379	BIN67
ATAC	chr1:9890461-9890462	Non-Epi	166.015	132.215	0.326219	BIN67
ATAC	chr1:9943132-9943133	Non-Epi	1106.79	966.123	0.195913	BIN67
ATAC	chr1:99682513-99682514	Non-Epi	139.839	107.228	0.379976	BIN67
ATAC	chr1:99971180-99971181	Non-Epi	255.074	216.568	0.235095	BIN67
ATAC	chr1:99978311-99978312	Non-Epi	239.394	254.292	-0.0867509	BIN67
ATAC	chr10:100006300-100006301	Non-Epi	190.041	132.248	0.519773	BIN67
ATAC	chr10:100010167-100010168	Non-Epi	794.505	785.785	0.0159017	BIN67
ATAC	chr10:100364968-100364969	Non-Epi	308.076	336.338	-0.126234	BIN67
ATAC	chr10:100371384-100371385	Non-Epi	516.543	456.206	0.178835	BIN67
ATAC	chr10:100373467-100373468	Non-Epi	1598.69	1373.46	0.21893	BIN67
ATAC	chr10:100373727-100373728	Non-Epi	1579.94	1363.14	0.212789	BIN67
ATAC	chr10:100373838-100373839	Non-Epi	1460.1	1302.62	0.164527	BIN67
ATAC	chr10:101013217-101013218	Non-Epi	388.265	396.678	-0.0308475	BIN67
ATAC	chr10:101052567-101052568	Non-Epi	195.984	139.754	0.484908	BIN67
ATAC	chr10:101244791-101244792	Non-Epi	191.287	157.625	0.277647	BIN67
ATAC	chr10:101353934-101353935	Non-Epi	2636.11	2312.74	0.188732	BIN67
ATAC	chr10:101367761-101367762	Non-Epi	184.585	60.9899	1.58198	BIN67
ATAC	chr10:101817279-101817280	Non-Epi	494.107	404.817	0.286909	BIN67
ATAC	chr10:102056096-102056097	Non-Epi	1427.62	1266.75	0.172351	BIN67
ATAC	chr10:102065115-102065116	Non-Epi	624.949	572.775	0.125558	BIN67
ATAC	chr10:102132776-102132777	Non-Epi	1843.36	1729.84	0.0916446	BIN67
ATAC	chr10:102133866-102133867	Non-Epi	470.261	407.336	0.20677	BIN67
ATAC	chr10:102245431-102245432	Non-Epi	2470.62	2215.83	0.156959	BIN67
ATAC	chr10:102310926-102310927	Non-Epi	115.181	90.4613	0.345137	BIN67
ATAC	chr10:102420952-102420953	Non-Epi	1585.65	1317.8	0.26676	BIN67
ATAC	chr10:102453253-102453254	Non-Epi	140.02	121.817	0.199384	BIN67
ATAC	chr10:102501766-102501767	Non-Epi	1809.8	1630.16	0.15073	BIN67
ATAC	chr10:102604681-102604682	Non-Epi	112.381	82.4191	0.442724	BIN67
ATAC	chr10:102646324-102646325	Non-Epi	602.206	356.419	0.755035	BIN67
ATAC	chr10:102743810-102743811	Non-Epi	1518.88	1434.74	0.082164	BIN67
ATAC	chr10:102854421-102854422	Non-Epi	901.068	987.145	-0.131486	BIN67
ATAC	chr10:102856029-102856030	Non-Epi	157.452	142.905	0.138926	BIN67
ATAC	chr10:103168710-103168711	Non-Epi	61.2394	72.1351	-0.232736	BIN67
ATAC	chr10:103241713-103241714	Non-Epi	185.163	125.375	0.558856	BIN67
ATAC	chr10:103254944-103254945	Non-Epi	105.317	123.052	-0.222569	BIN67
ATAC	chr10:103273185-103273186	Non-Epi	251.009	113.726	1.13528	BIN67
ATAC	chr10:103351088-103351089	Non-Epi	594.148	563.953	0.0751182	BIN67
ATAC	chr10:103368674-103368675	Non-Epi	1127.38	1227.92	-0.123135	BIN67
ATAC	chr10:103745518-103745519	Non-Epi	193.076	93.3207	1.04097	BIN67
ATAC	chr10:103781666-103781667	Non-Epi	212.622	125.197	0.759386	BIN67
ATAC	chr10:103888324-103888325	Non-Epi	264.576	212.376	0.315726	BIN67
ATAC	chr10:103888554-103888555	Non-Epi	283.725	239.086	0.246018	BIN67
ATAC	chr10:103895593-103895594	Non-Epi	101.56	136.179	-0.419596	BIN67
ATAC	chr10:103908402-103908403	Non-Epi	351.937	163.799	1.09871	BIN67
ATAC	chr10:103908478-103908479	Non-Epi	359.235	161.719	1.14655	BIN67
ATAC	chr10:103908614-103908615	Non-Epi	341.965	146.577	1.21659	BIN67
ATAC	chr10:103917998-103917999	Non-Epi	1519.64	1516.3	0.00317335	BIN67
ATAC	chr10:104077332-104077333	Non-Epi	190.149	88.4791	1.09508	BIN67
ATAC	chr10:104093955-104093956	Non-Epi	67.6524	30.8686	1.10717	BIN67
ATAC	chr10:104118079-104118080	Non-Epi	352.352	301.164	0.225777	BIN67
ATAC	chr10:104329395-104329396	Non-Epi	478.083	137.771	1.78756	BIN67
ATAC	chr10:104338591-104338592	Non-Epi	727.177	838.098	-0.20455	BIN67
ATAC	chr10:1049090-1049091	Non-Epi	4916.49	4192.28	0.229843	BIN67
ATAC	chr10:1049162-1049163	Non-Epi	4829.64	4118.85	0.229623	BIN67
ATAC	chr10:10605876-10605877	Non-Epi	182.345	96.18	0.915831	BIN67
ATAC	chr10:10792714-10792715	Non-Epi	434.493	497.147	-0.193924	BIN67
ATAC	chr10:10797473-10797474	Non-Epi	280.383	312.147	-0.154306	BIN67
ATAC	chr10:10798371-10798372	Non-Epi	312.321	337.654	-0.11217	BIN67
ATAC	chr10:10805400-10805401	Non-Epi	355.694	268.232	0.405838	BIN67
ATAC	chr10:10831103-10831104	Non-Epi	230.994	63.2157	1.85309	BIN67
ATAC	chr10:10870091-10870092	Non-Epi	117.565	54.8162	1.08693	BIN67
ATAC	chr10:10911466-10911467	Non-Epi	247.667	228.655	0.114748	BIN67
ATAC	chr10:109884336-109884337	Non-Epi	420.185	406.849	0.0464217	BIN67
ATAC	chr10:110007975-110007976	Non-Epi	2070.22	2088.02	-0.0123455	BIN67
ATAC	chr10:110039779-110039780	Non-Epi	150.425	176.243	-0.227129	BIN67
ATAC	chr10:110077077-110077078	Non-Epi	176.745	107.049	0.718125	BIN67
ATAC	chr10:11012261-11012262	Non-Epi	146.126	130.461	0.162418	BIN67
ATAC	chr10:110226260-110226261	Non-Epi	2172.28	1913.2	0.183131	BIN67
ATAC	chr10:110323717-110323718	Non-Epi	170.459	81.2656	1.0595	BIN67
ATAC	chr10:110326642-110326643	Non-Epi	126.742	95.1077	0.410511	BIN67
ATAC	chr10:110349956-110349957	Non-Epi	107.883	129.681	-0.263272	BIN67
ATAC	chr10:110398793-110398794	Non-Epi	196.598	90.7861	1.10622	BIN67
ATAC	chr10:110410667-110410668	Non-Epi	226.297	128.56	0.810962	BIN67
ATAC	chr10:110414727-110414728	Non-Epi	185.218	110.997	0.733529	BIN67
ATAC	chr10:110417390-110417391	Non-Epi	193.112	112.752	0.771002	BIN67
ATAC	chr10:110501374-110501375	Non-Epi	236.684	131.663	0.841281	BIN67
ATAC	chr10:110774370-110774371	Non-Epi	230.325	93.2557	1.29527	BIN67
ATAC	chr10:110852454-110852455	Non-Epi	199.073	106.578	0.895147	BIN67
ATAC	chr10:110918814-110918815	Non-Epi	2973.82	2676.05	0.152156	BIN67
ATAC	chr10:111297680-111297681	Non-Epi	129.163	94.8804	0.44101	BIN67
ATAC	chr10:112383553-112383554	Non-Epi	202.451	64.6128	1.63263	BIN67
ATAC	chr10:112563511-112563512	Non-Epi	139.026	124.985	0.15244	BIN67
ATAC	chr10:112815961-112815962	Non-Epi	223.117	82.1105	1.43115	BIN67
ATAC	chr10:113087555-113087556	Non-Epi	571.387	270.019	1.0786	BIN67
ATAC	chr10:113326522-113326523	Non-Epi	153.948	78.0163	0.971557	BIN67
ATAC	chr10:113524383-113524384	Non-Epi	165.094	189.322	-0.196448	BIN67
ATAC	chr10:114026695-114026696	Non-Epi	184.17	76.6029	1.25467	BIN67
ATAC	chr10:114151460-114151461	Non-Epi	144.518	82.5329	0.800779	BIN67
ATAC	chr10:114271661-114271662	Non-Epi	254.839	90.4125	1.48477	BIN67
ATAC	chr10:114306743-114306744	Non-Epi	238.183	129.746	0.871354	BIN67
ATAC	chr10:114505044-114505045	Non-Epi	273.428	124.059	1.13381	BIN67
ATAC	chr10:114507523-114507524	Non-Epi	257.838	159.899	0.685889	BIN67
ATAC	chr10:114624013-114624014	Non-Epi	182.815	99.1207	0.876514	BIN67
ATAC	chr10:114633523-114633524	Non-Epi	249.456	111.842	1.15025	BIN67
ATAC	chr10:114634832-114634833	Non-Epi	131.511	63.4919	1.03892	BIN67
ATAC	chr10:114648288-114648289	Non-Epi	107.377	97.9023	0.131979	BIN67
ATAC	chr10:114684503-114684504	Non-Epi	128.422	104.645	0.292866	BIN67
ATAC	chr10:114714379-114714380	Non-Epi	142.838	98.1783	0.536346	BIN67
ATAC	chr10:114754785-114754786	Non-Epi	143.976	99.1045	0.534306	BIN67
ATAC	chr10:114779776-114779777	Non-Epi	144.482	62.6146	1.19341	BIN67
ATAC	chr10:11539362-11539363	Non-Epi	152.141	112.979	0.426091	BIN67
ATAC	chr10:11552350-11552351	Non-Epi	207.925	91.4685	1.17595	BIN67
ATAC	chr10:116114206-116114207	Non-Epi	412.49	94.3929	2.1159	BIN67
ATAC	chr10:11611503-11611504	Non-Epi	928.292	821.771	0.17564	BIN67
ATAC	chr10:116469561-116469562	Non-Epi	82.068	100.957	-0.295589	BIN67
ATAC	chr10:116471173-116471174	Non-Epi	156.278	102.078	0.609585	BIN67
ATAC	chr10:116888708-116888709	Non-Epi	203.084	90.2338	1.16152	BIN67
ATAC	chr10:116888828-116888829	Non-Epi	200.88	95.0103	1.07223	BIN67
ATAC	chr10:116947309-116947310	Non-Epi	216.451	105.018	1.03638	BIN67
ATAC	chr10:116974654-116974655	Non-Epi	153.695	74.7995	1.02916	BIN67
ATAC	chr10:117137320-117137321	Non-Epi	519.18	596.089	-0.198936	BIN67
ATAC	chr10:117187109-117187110	Non-Epi	212.784	136.374	0.638045	BIN67
ATAC	chr10:117221422-117221423	Non-Epi	327.73	86.3995	1.91121	BIN67
ATAC	chr10:117442976-117442977	Non-Epi	231.192	179.103	0.366499	BIN67
ATAC	chr10:117457595-117457596	Non-Epi	273.771	116.326	1.22771	BIN67
ATAC	chr10:117462016-117462017	Non-Epi	252.147	121.265	1.04997	BIN67
ATAC	chr10:117736937-117736938	Non-Epi	326.068	129.908	1.32104	BIN67
ATAC	chr10:117980376-117980377	Non-Epi	197.773	98.3895	0.999953	BIN67
ATAC	chr10:118501698-118501699	Non-Epi	144.084	114.409	0.330138	BIN67
ATAC	chr10:118798237-118798238	Non-Epi	207.311	75.5631	1.44402	BIN67
ATAC	chr10:119007048-119007049	Non-Epi	194.629	152.816	0.346919	BIN67
ATAC	chr10:119031858-119031859	Non-Epi	192.1	230.865	-0.263933	BIN67
ATAC	chr10:119271310-119271311	Non-Epi	165.473	177.901	-0.10387	BIN67
ATAC	chr10:119271537-119271538	Non-Epi	179.311	174.424	0.0396391	BIN67
ATAC	chr10:119315396-119315397	Non-Epi	165.112	100.144	0.715739	BIN67
ATAC	chr10:119317087-119317088	Non-Epi	260.132	97.9021	1.40071	BIN67
ATAC	chr10:119521825-119521826	Non-Epi	92.3107	110.64	-0.258734	BIN67
ATAC	chr10:119620558-119620559	Non-Epi	232.71	135.205	0.778943	BIN67
ATAC	chr10:119651634-119651635	Non-Epi	1476.72	1395.33	0.0817361	BIN67
ATAC	chr10:119734997-119734998	Non-Epi	128.26	70.6241	0.851753	BIN67
ATAC	chr10:119803429-119803430	Non-Epi	109.021	69.6493	0.639027	BIN67
ATAC	chr10:119849496-119849497	Non-Epi	102.282	93.7755	0.124008	BIN67
ATAC	chr10:12082315-12082316	Non-Epi	84.9042	97.7235	-0.200664	BIN67
ATAC	chr10:121092628-121092629	Non-Epi	128.115	73.2723	0.79776	BIN67
ATAC	chr10:121327350-121327351	Non-Epi	106.221	95.2053	0.156393	BIN67
ATAC	chr10:121927293-121927294	Non-Epi	658.839	602.393	0.129016	BIN67
ATAC	chr10:122127392-122127393	Non-Epi	172.699	93.2557	0.881937	BIN67
ATAC	chr10:122141151-122141152	Non-Epi	261.144	125.083	1.05599	BIN67
ATAC	chr10:122183305-122183306	Non-Epi	171.705	95.4489	0.840475	BIN67
ATAC	chr10:12222364-12222365	Non-Epi	78.5815	96.375	-0.291118	BIN67
ATAC	chr10:122282493-122282494	Non-Epi	96.7004	88.1705	0.131799	BIN67
ATAC	chr10:122308121-122308122	Non-Epi	188.668	83.3127	1.16965	BIN67
ATAC	chr10:122308346-122308347	Non-Epi	194.521	93.5806	1.04771	BIN67
ATAC	chr10:122442360-122442361	Non-Epi	137.473	74.4096	0.87678	BIN67
ATAC	chr10:122852653-122852654	Non-Epi	67.9776	70.4129	-0.0500587	BIN67
ATAC	chr10:122861980-122861981	Non-Epi	147.95	58.9753	1.31239	BIN67
ATAC	chr10:123008210-123008211	Non-Epi	619.439	499.097	0.311083	BIN67
ATAC	chr10:123080117-123080118	Non-Epi	87.7223	103.459	-0.235562	BIN67
ATAC	chr10:123129890-123129891	Non-Epi	218.402	101.704	1.09509	BIN67
ATAC	chr10:123301283-123301284	Non-Epi	72.5659	63.8167	0.182672	BIN67
ATAC	chr10:123331646-123331647	Non-Epi	103.33	86.0746	0.260833	BIN67
ATAC	chr10:123858319-123858320	Non-Epi	135.919	92.6058	0.548653	BIN67
ATAC	chr10:123995486-123995487	Non-Epi	310.822	217.185	0.515169	BIN67
ATAC	chr10:124461920-124461921	Non-Epi	748.06	702.017	0.0915219	BIN67
ATAC	chr10:124743709-124743710	Non-Epi	325.996	350.261	-0.103272	BIN67
ATAC	chr10:125158960-125158961	Non-Epi	501.838	433.46	0.21087	BIN67
ATAC	chr10:125201379-125201380	Non-Epi	200.609	134.132	0.577187	BIN67
ATAC	chr10:125521042-125521043	Non-Epi	81.761	41.4614	0.962798	BIN67
ATAC	chr10:126062667-126062668	Non-Epi	223.912	110.103	1.01746	BIN67
ATAC	chr10:126247537-126247538	Non-Epi	175.716	92.7358	0.914757	BIN67
ATAC	chr10:126569840-126569841	Non-Epi	188.415	80.5833	1.21521	BIN67
ATAC	chr10:12720733-12720734	Non-Epi	287.247	94.6853	1.59094	BIN67
ATAC	chr10:127923211-127923212	Non-Epi	147.517	60.275	1.27725	BIN67
ATAC	chr10:127990675-127990676	Non-Epi	95.6527	101.46	-0.0841812	BIN67
ATAC	chr10:127991427-127991428	Non-Epi	139.116	80.5995	0.779993	BIN67
ATAC	chr10:128629594-128629595	Non-Epi	208.575	110.217	0.914089	BIN67
ATAC	chr10:129467209-129467210	Non-Epi	834.97	724.714	0.20405	BIN67
ATAC	chr10:130138764-130138765	Non-Epi	195.749	92.0534	1.08023	BIN67
ATAC	chr10:131888340-131888341	Non-Epi	179.022	55.8884	1.66196	BIN67
ATAC	chr10:131991949-131991950	Non-Epi	59.1258	88.8203	-0.579058	BIN67
ATAC	chr10:132330466-132330467	Non-Epi	374.229	293.349	0.350241	BIN67
ATAC	chr10:132532568-132532569	Non-Epi	339.147	137.836	1.29277	BIN67
ATAC	chr10:132532940-132532941	Non-Epi	387.669	143.783	1.42465	BIN67
ATAC	chr10:13302333-13302334	Non-Epi	1119.33	1001	0.16103	BIN67
ATAC	chr10:133144241-133144242	Non-Epi	208.557	177.397	0.232253	BIN67
[truncated: 13,705 more rows]
