# Supplementary material for: Re-expression of SMARCA4/BRG1 in small cell carcinoma of ovary, hypercalcemic type (SCCOHT) promotes an epithelial-like gene signature through an AP-1-dependent mechanism
Source: eLife. 2020 Dec 23;9:e59073. doi: 10.7554/eLife.59073 (PMC7813545; doi:10.7554/eLife.59073)
Supplement: Figure 6—source data 1. [file elife-59073-fig6-data1.xlsx]

## Sheet: Panel_C
rowname	sample	value	Line	Condition	Treat
AADAC	B12	-0.493765	AFOS	CTRL	veh
AADACL3	B12	-0.353553	AFOS	CTRL	veh
AAK1	B12	1.37387	AFOS	CTRL	veh
AAMP	B12	-1.64668	AFOS	CTRL	veh
AATF	B12	-0.590386	AFOS	CTRL	veh
ABAT	B12	-0.475034	AFOS	CTRL	veh
ABCA1	B12	-0.848816	AFOS	CTRL	veh
ABCA12	B12	-0.555376	AFOS	CTRL	veh
ABCA13	B12	-0.353553	AFOS	CTRL	veh
ABCA4	B12	-0.546706	AFOS	CTRL	veh
ABCA7	B12	-0.137752	AFOS	CTRL	veh
ABCB1	B12	0.432937	AFOS	CTRL	veh
ABCB6	B12	-0.665235	AFOS	CTRL	veh
ABCB8	B12	-0.933115	AFOS	CTRL	veh
ABCC1	B12	0.623584	AFOS	CTRL	veh
ABCC2	B12	-0.0585277	AFOS	CTRL	veh
ABCC3	B12	-0.860622	AFOS	CTRL	veh
ABCD4	B12	-1.0221	AFOS	CTRL	veh
ABCG1	B12	-0.934294	AFOS	CTRL	veh
ABHD16A	B12	-0.780632	AFOS	CTRL	veh
ABHD4	B12	0.325304	AFOS	CTRL	veh
ABL2	B12	1.39687	AFOS	CTRL	veh
ABLIM1	B12	-0.607343	AFOS	CTRL	veh
ABLIM2	B12	-0.101053	AFOS	CTRL	veh
ABLIM3	B12	1.26446	AFOS	CTRL	veh
ABR	B12	1.3286	AFOS	CTRL	veh
ABTB1	B12	-0.740071	AFOS	CTRL	veh
ABTB2	B12	-0.705791	AFOS	CTRL	veh
AC002398.9	B12	1.60274	AFOS	CTRL	veh
AC004231.7	B12	-0.353553	AFOS	CTRL	veh
AC007325.2	B12	-1.14239	AFOS	CTRL	veh
AC104534.3	B12	1.56284	AFOS	CTRL	veh
AC108938.5	B12	-0.619377	AFOS	CTRL	veh
AC138969.4	B12	-0.460924	AFOS	CTRL	veh
AC145212.2	B12	0.163051	AFOS	CTRL	veh
ACAA1	B12	-1.28653	AFOS	CTRL	veh
ACADVL	B12	-0.440325	AFOS	CTRL	veh
ACE2	B12	-0.762697	AFOS	CTRL	veh
ACHE	B12	-0.561658	AFOS	CTRL	veh
ACKR2	B12	-0.534336	AFOS	CTRL	veh
ACKR3	B12	-0.861944	AFOS	CTRL	veh
ACKR4	B12	0.527371	AFOS	CTRL	veh
ACOX2	B12	-0.857885	AFOS	CTRL	veh
ACP2	B12	-1.57778	AFOS	CTRL	veh
ACR	B12	-0.153689	AFOS	CTRL	veh
ACSL3	B12	-0.407732	AFOS	CTRL	veh
ACSL4	B12	0.453027	AFOS	CTRL	veh
ACSL5	B12	-0.848402	AFOS	CTRL	veh
ACSM5	B12	-0.353553	AFOS	CTRL	veh
ACTA2	B12	-1.0904	AFOS	CTRL	veh
ACTB	B12	-0.181038	AFOS	CTRL	veh
ACTBL2	B12	-0.50149	AFOS	CTRL	veh
ACTL8	B12	-0.545123	AFOS	CTRL	veh
ACTN1	B12	-0.785001	AFOS	CTRL	veh
ACTN2	B12	-0.231814	AFOS	CTRL	veh
ACTN4	B12	-0.767463	AFOS	CTRL	veh
ACTR3C	B12	-0.518578	AFOS	CTRL	veh
ACVR1	B12	0.211036	AFOS	CTRL	veh
ACVR1B	B12	-0.50588	AFOS	CTRL	veh
ACVR1C	B12	-0.00626413	AFOS	CTRL	veh
ACVRL1	B12	-0.796602	AFOS	CTRL	veh
ACYP2	B12	-0.849712	AFOS	CTRL	veh
ADAD2	B12	-0.824943	AFOS	CTRL	veh
ADAM12	B12	-0.103916	AFOS	CTRL	veh
ADAM15	B12	-0.82832	AFOS	CTRL	veh
ADAM19	B12	-0.337394	AFOS	CTRL	veh
ADAM21	B12	-1.00994	AFOS	CTRL	veh
ADAM9	B12	-0.453001	AFOS	CTRL	veh
ADAMTS12	B12	-0.577887	AFOS	CTRL	veh
ADAMTS14	B12	-0.763657	AFOS	CTRL	veh
ADAMTS15	B12	-0.762738	AFOS	CTRL	veh
ADAMTS16	B12	-0.534555	AFOS	CTRL	veh
ADAMTS17	B12	-1.53195	AFOS	CTRL	veh
ADAMTS4	B12	-0.554964	AFOS	CTRL	veh
ADAMTSL4	B12	-0.479405	AFOS	CTRL	veh
ADAR	B12	-0.184306	AFOS	CTRL	veh
ADARB2	B12	-0.538451	AFOS	CTRL	veh
ADCY9	B12	1.61996	AFOS	CTRL	veh
ADD1	B12	1.66595	AFOS	CTRL	veh
ADGRD1	B12	-0.073637	AFOS	CTRL	veh
ADGRE1	B12	-0.687743	AFOS	CTRL	veh
ADGRF1	B12	0.308189	AFOS	CTRL	veh
ADGRF4	B12	-0.562871	AFOS	CTRL	veh
ADGRF5	B12	-0.302631	AFOS	CTRL	veh
ADGRG1	B12	-0.823685	AFOS	CTRL	veh
ADGRG2	B12	-1.04294	AFOS	CTRL	veh
ADH7	B12	NA	AFOS	CTRL	veh
ADI1	B12	-0.954193	AFOS	CTRL	veh
ADK	B12	-0.379237	AFOS	CTRL	veh
ADM	B12	-0.990767	AFOS	CTRL	veh
ADORA1	B12	-0.326087	AFOS	CTRL	veh
ADORA2B	B12	-0.644383	AFOS	CTRL	veh
ADPRH	B12	-0.353553	AFOS	CTRL	veh
ADPRHL2	B12	-1.25191	AFOS	CTRL	veh
ADPRM	B12	-0.755486	AFOS	CTRL	veh
ADRA1B	B12	-0.583657	AFOS	CTRL	veh
ADRA1D	B12	-0.568649	AFOS	CTRL	veh
ADRB1	B12	-0.370019	AFOS	CTRL	veh
ADRB2	B12	-0.495513	AFOS	CTRL	veh
ADTRP	B12	-0.353553	AFOS	CTRL	veh
AF165138.7	B12	-0.5092	AFOS	CTRL	veh
AFAP1	B12	0.691221	AFOS	CTRL	veh
AFAP1L2	B12	-0.90578	AFOS	CTRL	veh
AFF1	B12	0.807883	AFOS	CTRL	veh
AFP	B12	-0.353553	AFOS	CTRL	veh
AFTPH	B12	-0.0742768	AFOS	CTRL	veh
AGAP14P	B12	0.704502	AFOS	CTRL	veh
AGAP3	B12	-0.287044	AFOS	CTRL	veh
AGAP5	B12	-1.24672	AFOS	CTRL	veh
AGFG2	B12	-0.728947	AFOS	CTRL	veh
AGPAT3	B12	1.13937	AFOS	CTRL	veh
AGPS	B12	0.242221	AFOS	CTRL	veh
AGRN	B12	-0.667897	AFOS	CTRL	veh
AGT	B12	-0.914386	AFOS	CTRL	veh
AGTRAP	B12	-1.33648	AFOS	CTRL	veh
AGXT	B12	-0.518578	AFOS	CTRL	veh
AHCYL1	B12	-0.819814	AFOS	CTRL	veh
AHDC1	B12	-0.201846	AFOS	CTRL	veh
AHNAK	B12	1.32528	AFOS	CTRL	veh
AHNAK2	B12	0.0561128	AFOS	CTRL	veh
AHR	B12	0.511046	AFOS	CTRL	veh
AIFM2	B12	-0.241778	AFOS	CTRL	veh
AIM1	B12	0.835032	AFOS	CTRL	veh
AIM1L	B12	-0.816926	AFOS	CTRL	veh
AIM2	B12	-0.353553	AFOS	CTRL	veh
AJAP1	B12	-0.686859	AFOS	CTRL	veh
AJUBA	B12	-0.95918	AFOS	CTRL	veh
AK3	B12	-0.387829	AFOS	CTRL	veh
AK4	B12	-0.0619273	AFOS	CTRL	veh
AKAP12	B12	0.507811	AFOS	CTRL	veh
AKAP13	B12	0.588934	AFOS	CTRL	veh
AKAP2	B12	-0.198515	AFOS	CTRL	veh
AKAP6	B12	1.50882	AFOS	CTRL	veh
AKAP8L	B12	-0.548248	AFOS	CTRL	veh
AKAP9	B12	1.50288	AFOS	CTRL	veh
AKIRIN2	B12	-1.21517	AFOS	CTRL	veh
AKR1B10	B12	-0.703879	AFOS	CTRL	veh
AKR1B15	B12	NA	AFOS	CTRL	veh
AKR1C1	B12	-0.786901	AFOS	CTRL	veh
AKR1C2	B12	-0.747798	AFOS	CTRL	veh
AKR1C3	B12	-0.709334	AFOS	CTRL	veh
AKR1D1	B12	NA	AFOS	CTRL	veh
AL589743.1	B12	-1.1078	AFOS	CTRL	veh
ALDH1A2	B12	1.05334	AFOS	CTRL	veh
ALDH1A3	B12	0.477003	AFOS	CTRL	veh
ALDH1L1	B12	-0.636628	AFOS	CTRL	veh
ALDH2	B12	-0.607361	AFOS	CTRL	veh
ALDH3A2	B12	0.401108	AFOS	CTRL	veh
ALDH3B1	B12	-0.865042	AFOS	CTRL	veh
ALDH4A1	B12	-0.0260081	AFOS	CTRL	veh
ALDH6A1	B12	-0.312519	AFOS	CTRL	veh
ALDOA	B12	-1.17223	AFOS	CTRL	veh
ALG14	B12	-0.165853	AFOS	CTRL	veh
ALK	B12	-0.353553	AFOS	CTRL	veh
ALOX5	B12	-0.642471	AFOS	CTRL	veh
ALOX5AP	B12	-0.630843	AFOS	CTRL	veh
ALOXE3	B12	1.41222	AFOS	CTRL	veh
ALPK1	B12	-0.703246	AFOS	CTRL	veh
ALPK2	B12	-0.655126	AFOS	CTRL	veh
ALPL	B12	-0.833256	AFOS	CTRL	veh
ALPP	B12	-0.876179	AFOS	CTRL	veh
ALPPL2	B12	-0.624935	AFOS	CTRL	veh
ALS2CL	B12	-0.365327	AFOS	CTRL	veh
AMBN	B12	NA	AFOS	CTRL	veh
AMFR	B12	-0.222948	AFOS	CTRL	veh
AMIGO2	B12	-0.195141	AFOS	CTRL	veh
AMOTL1	B12	0.233935	AFOS	CTRL	veh
AMOTL2	B12	-0.669249	AFOS	CTRL	veh
AMPD3	B12	-0.677595	AFOS	CTRL	veh
AMTN	B12	NA	AFOS	CTRL	veh
ANAPC13	B12	-0.484686	AFOS	CTRL	veh
ANAPC16	B12	-1.57195	AFOS	CTRL	veh
ANGPT4	B12	-0.410513	AFOS	CTRL	veh
ANGPTL2	B12	0.183638	AFOS	CTRL	veh
ANGPTL4	B12	-0.968533	AFOS	CTRL	veh
ANGPTL7	B12	-0.547733	AFOS	CTRL	veh
ANK1	B12	-0.383951	AFOS	CTRL	veh
ANKFY1	B12	0.677105	AFOS	CTRL	veh
ANKH	B12	0.45494	AFOS	CTRL	veh
ANKHD1-EIF4EBP3	B12	0.401511	AFOS	CTRL	veh
ANKIB1	B12	1.06595	AFOS	CTRL	veh
ANKLE2	B12	0.12559	AFOS	CTRL	veh
ANKMY2	B12	0.857396	AFOS	CTRL	veh
ANKRA2	B12	-0.696955	AFOS	CTRL	veh
ANKRD10	B12	-0.79553	AFOS	CTRL	veh
ANKRD11	B12	0.592304	AFOS	CTRL	veh
ANKRD13A	B12	1.42431	AFOS	CTRL	veh
ANKRD2	B12	-0.560734	AFOS	CTRL	veh
ANKRD20A1	B12	-1.22726	AFOS	CTRL	veh
ANKRD29	B12	-0.283186	AFOS	CTRL	veh
ANKRD30B	B12	-0.353553	AFOS	CTRL	veh
ANKRD33B	B12	-0.587655	AFOS	CTRL	veh
ANKRD34C	B12	-0.640557	AFOS	CTRL	veh
ANKRD42	B12	1.99443	AFOS	CTRL	veh
ANKRD52	B12	1.49374	AFOS	CTRL	veh
ANKRD9	B12	-0.983128	AFOS	CTRL	veh
ANKS1A	B12	1.10398	AFOS	CTRL	veh
ANKUB1	B12	-0.641869	AFOS	CTRL	veh
ANKZF1	B12	-0.487674	AFOS	CTRL	veh
ANO1	B12	-0.67734	AFOS	CTRL	veh
ANO2	B12	-0.94832	AFOS	CTRL	veh
ANO4	B12	-0.353553	AFOS	CTRL	veh
ANO6	B12	1.58496	AFOS	CTRL	veh
ANO9	B12	-0.0816755	AFOS	CTRL	veh
ANTXR1	B12	-0.880473	AFOS	CTRL	veh
ANTXRL	B12	-0.53902	AFOS	CTRL	veh
ANXA1	B12	-0.409634	AFOS	CTRL	veh
ANXA10	B12	NA	AFOS	CTRL	veh
ANXA11	B12	0.264309	AFOS	CTRL	veh
ANXA13	B12	-0.61883	AFOS	CTRL	veh
ANXA2	B12	-0.642285	AFOS	CTRL	veh
ANXA3	B12	-0.650552	AFOS	CTRL	veh
ANXA4	B12	-1.20689	AFOS	CTRL	veh
ANXA5	B12	-0.588305	AFOS	CTRL	veh
ANXA8	B12	-0.601686	AFOS	CTRL	veh
ANXA8L1	B12	-0.276651	AFOS	CTRL	veh
AOAH	B12	NA	AFOS	CTRL	veh
AOC1	B12	-0.64414	AFOS	CTRL	veh
AOC2	B12	0.29485	AFOS	CTRL	veh
AOC3	B12	0.425196	AFOS	CTRL	veh
AOX1	B12	-0.531375	AFOS	CTRL	veh
AP000322.53	B12	NA	AFOS	CTRL	veh
AP003419.11	B12	0.984443	AFOS	CTRL	veh
AP1G2	B12	-0.933497	AFOS	CTRL	veh
AP1S1	B12	-1.19571	AFOS	CTRL	veh
AP2A1	B12	0.0189728	AFOS	CTRL	veh
AP2M1	B12	-1.53636	AFOS	CTRL	veh
AP3B2	B12	1.08144	AFOS	CTRL	veh
AP3S1	B12	1.4746	AFOS	CTRL	veh
AP5S1	B12	-0.771909	AFOS	CTRL	veh
APBA1	B12	1.42544	AFOS	CTRL	veh
APCDD1L	B12	-0.467055	AFOS	CTRL	veh
APLNR	B12	NA	AFOS	CTRL	veh
APLP2	B12	-1.11861	AFOS	CTRL	veh
APOA1	B12	-0.764614	AFOS	CTRL	veh
APOBEC3B	B12	-0.668563	AFOS	CTRL	veh
APOBEC3C	B12	-0.777918	AFOS	CTRL	veh
APOBEC3F	B12	-0.404066	AFOS	CTRL	veh
APOBEC3G	B12	-0.666079	AFOS	CTRL	veh
APOBEC3H	B12	-0.818982	AFOS	CTRL	veh
APOC3	B12	-0.576634	AFOS	CTRL	veh
APOD	B12	-0.648108	AFOS	CTRL	veh
APOL1	B12	-0.708936	AFOS	CTRL	veh
APOL2	B12	-0.780075	AFOS	CTRL	veh
APOL3	B12	-0.864353	AFOS	CTRL	veh
APOL4	B12	-0.749242	AFOS	CTRL	veh
APOL6	B12	-0.751943	AFOS	CTRL	veh
APP	B12	-0.396944	AFOS	CTRL	veh
APPBP2	B12	0.837205	AFOS	CTRL	veh
AQP1	B12	-0.828415	AFOS	CTRL	veh
AQP2	B12	-0.353553	AFOS	CTRL	veh
AQP3	B12	-0.63518	AFOS	CTRL	veh
AQP5	B12	-0.67159	AFOS	CTRL	veh
AQP7	B12	-0.898462	AFOS	CTRL	veh
AQP9	B12	-0.60037	AFOS	CTRL	veh
ARAP1	B12	0.564088	AFOS	CTRL	veh
ARAP3	B12	-0.896299	AFOS	CTRL	veh
ARC	B12	-0.741316	AFOS	CTRL	veh
AREG	B12	-1.31135	AFOS	CTRL	veh
ARF6	B12	-0.741976	AFOS	CTRL	veh
ARFGEF1	B12	1.54774	AFOS	CTRL	veh
ARHGAP1	B12	0.635738	AFOS	CTRL	veh
ARHGAP12	B12	1.62844	AFOS	CTRL	veh
ARHGAP17	B12	1.45227	AFOS	CTRL	veh
ARHGAP18	B12	-0.444301	AFOS	CTRL	veh
ARHGAP20	B12	-0.772402	AFOS	CTRL	veh
ARHGAP21	B12	0.825693	AFOS	CTRL	veh
ARHGAP23	B12	0.421983	AFOS	CTRL	veh
ARHGAP26	B12	0.57968	AFOS	CTRL	veh
ARHGAP27	B12	-0.193371	AFOS	CTRL	veh
ARHGAP29	B12	-0.603725	AFOS	CTRL	veh
ARHGAP30	B12	-1.16364	AFOS	CTRL	veh
ARHGAP31	B12	-0.858902	AFOS	CTRL	veh
ARHGAP42	B12	0.736425	AFOS	CTRL	veh
ARHGAP5	B12	0.94486	AFOS	CTRL	veh
ARHGAP9	B12	-0.842396	AFOS	CTRL	veh
ARHGDIA	B12	-0.396635	AFOS	CTRL	veh
ARHGDIB	B12	-0.353553	AFOS	CTRL	veh
ARHGEF10L	B12	-0.253409	AFOS	CTRL	veh
ARHGEF12	B12	1.44863	AFOS	CTRL	veh
ARHGEF15	B12	0.0259579	AFOS	CTRL	veh
ARHGEF18	B12	-0.133477	AFOS	CTRL	veh
ARHGEF2	B12	-0.186411	AFOS	CTRL	veh
ARHGEF28	B12	-0.387622	AFOS	CTRL	veh
ARHGEF3	B12	-0.609012	AFOS	CTRL	veh
ARHGEF37	B12	0.661724	AFOS	CTRL	veh
ARHGEF5	B12	-0.353553	AFOS	CTRL	veh
ARID5A	B12	-0.902855	AFOS	CTRL	veh
ARL 11.00	B12	-0.353553	AFOS	CTRL	veh
ARL 14.00	B12	-0.583568	AFOS	CTRL	veh
ARL14EPL	B12	-0.353553	AFOS	CTRL	veh
ARL 15.00	B12	0.959618	AFOS	CTRL	veh
ARL2BP	B12	-0.0174396	AFOS	CTRL	veh
ARL4C	B12	-0.620398	AFOS	CTRL	veh
ARL6IP5	B12	0.0443511	AFOS	CTRL	veh
ARNTL	B12	0.633176	AFOS	CTRL	veh
ARNTL2	B12	-0.420862	AFOS	CTRL	veh
ARRB1	B12	1.20949	AFOS	CTRL	veh
ARRDC1	B12	-0.58581	AFOS	CTRL	veh
ARRDC2	B12	-0.927942	AFOS	CTRL	veh
ARRDC3	B12	-0.374501	AFOS	CTRL	veh
ARRDC4	B12	-0.377722	AFOS	CTRL	veh
ARSA	B12	-0.54563	AFOS	CTRL	veh
ARSI	B12	-0.666397	AFOS	CTRL	veh
ARSJ	B12	-0.619089	AFOS	CTRL	veh
ART4	B12	-0.468236	AFOS	CTRL	veh
ARTN	B12	-0.774424	AFOS	CTRL	veh
ASAP1	B12	0.809748	AFOS	CTRL	veh
ASAP2	B12	0.808207	AFOS	CTRL	veh
ASAP3	B12	-0.676511	AFOS	CTRL	veh
ASB2	B12	-0.450572	AFOS	CTRL	veh
ASB5	B12	-0.886902	AFOS	CTRL	veh
ASCC2	B12	-0.727986	AFOS	CTRL	veh
ASIC2	B12	-0.353553	AFOS	CTRL	veh
ASIC3	B12	0.142416	AFOS	CTRL	veh
ASPH	B12	-0.12986	AFOS	CTRL	veh
ASTL	B12	2.47487	AFOS	CTRL	veh
ASTN1	B12	-0.523759	AFOS	CTRL	veh
ATF3	B12	-0.578769	AFOS	CTRL	veh
ATF4	B12	-0.21116	AFOS	CTRL	veh
ATF6	B12	1.29584	AFOS	CTRL	veh
ATG12	B12	1.36793	AFOS	CTRL	veh
ATG13	B12	0.816088	AFOS	CTRL	veh
ATG14	B12	-0.0668239	AFOS	CTRL	veh
ATG16L1	B12	-0.555624	AFOS	CTRL	veh
ATG2A	B12	-0.706977	AFOS	CTRL	veh
ATG4A	B12	-0.280835	AFOS	CTRL	veh
ATG9A	B12	-0.690299	AFOS	CTRL	veh
ATG9B	B12	-0.415706	AFOS	CTRL	veh
ATL3	B12	1.21947	AFOS	CTRL	veh
ATMIN	B12	0.379562	AFOS	CTRL	veh
ATOH8	B12	-0.879727	AFOS	CTRL	veh
ATOX1	B12	-1.494	AFOS	CTRL	veh
ATP10A	B12	-0.421092	AFOS	CTRL	veh
ATP10B	B12	-0.539459	AFOS	CTRL	veh
ATP10D	B12	1.67007	AFOS	CTRL	veh
ATP13A2	B12	0.112608	AFOS	CTRL	veh
ATP13A3	B12	1.00747	AFOS	CTRL	veh
ATP13A4	B12	1.12525	AFOS	CTRL	veh
ATP13A5	B12	-0.353553	AFOS	CTRL	veh
ATP1A1	B12	-0.615485	AFOS	CTRL	veh
ATP1A2	B12	-0.589782	AFOS	CTRL	veh
ATP2B4	B12	1.24413	AFOS	CTRL	veh
ATP2C1	B12	1.7379	AFOS	CTRL	veh
ATP6AP1L	B12	-1.4807	AFOS	CTRL	veh
ATP6V0A1	B12	1.38931	AFOS	CTRL	veh
ATP6V0A4	B12	-0.744424	AFOS	CTRL	veh
ATP6V0C	B12	-0.664716	AFOS	CTRL	veh
ATP6V0D2	B12	-0.539053	AFOS	CTRL	veh
ATP6V0E1	B12	-0.948704	AFOS	CTRL	veh
ATP6V1B1	B12	-0.899922	AFOS	CTRL	veh
ATP6V1B2	B12	0.0421058	AFOS	CTRL	veh
ATP6V1C2	B12	-0.527927	AFOS	CTRL	veh
ATP6V1D	B12	-0.489217	AFOS	CTRL	veh
ATP6V1E1	B12	-1.02904	AFOS	CTRL	veh
ATP8B1	B12	-0.397402	AFOS	CTRL	veh
ATXN1	B12	-0.317822	AFOS	CTRL	veh
ATXN1L	B12	0.738921	AFOS	CTRL	veh
ATXN3	B12	-0.11815	AFOS	CTRL	veh
AUH	B12	-0.690153	AFOS	CTRL	veh
AUTS2	B12	0.382319	AFOS	CTRL	veh
AVEN	B12	-0.815415	AFOS	CTRL	veh
AVPI1	B12	-0.763464	AFOS	CTRL	veh
AXL	B12	-0.72491	AFOS	CTRL	veh
AZGP1	B12	-0.71251	AFOS	CTRL	veh
B2M	B12	-1.06553	AFOS	CTRL	veh
B3GLCT	B12	0.542844	AFOS	CTRL	veh
B3GNT9	B12	-1.62728	AFOS	CTRL	veh
B4GALNT2	B12	NA	AFOS	CTRL	veh
B4GALNT3	B12	-0.47669	AFOS	CTRL	veh
B4GALT1	B12	0.983776	AFOS	CTRL	veh
B4GALT4	B12	-0.745489	AFOS	CTRL	veh
BACE1	B12	0.54135	AFOS	CTRL	veh
BACE2	B12	-0.829585	AFOS	CTRL	veh
BACH1	B12	0.530286	AFOS	CTRL	veh
BACH2	B12	1.57199	AFOS	CTRL	veh
BAG1	B12	-0.553516	AFOS	CTRL	veh
BAG3	B12	-0.482528	AFOS	CTRL	veh
BAIAP2	B12	-0.131352	AFOS	CTRL	veh
BAK1	B12	-0.496437	AFOS	CTRL	veh
BAMBI	B12	-0.893416	AFOS	CTRL	veh
BANK1	B12	-0.378486	AFOS	CTRL	veh
BARX2	B12	-0.938143	AFOS	CTRL	veh
BASP1	B12	-0.721217	AFOS	CTRL	veh
BATF2	B12	-0.941917	AFOS	CTRL	veh
BAZ2B	B12	0.368174	AFOS	CTRL	veh
BBC3	B12	-1.06766	AFOS	CTRL	veh
BBOX1	B12	-0.686589	AFOS	CTRL	veh
BCAM	B12	-1.40528	AFOS	CTRL	veh
BCAP29	B12	0.0560074	AFOS	CTRL	veh
BCAR1	B12	-0.966368	AFOS	CTRL	veh
BCAR3	B12	-0.492584	AFOS	CTRL	veh
BCAS3	B12	0.376176	AFOS	CTRL	veh
BCAT1	B12	-0.61218	AFOS	CTRL	veh
BCKDHA	B12	-2.02227	AFOS	CTRL	veh
BCL10	B12	0.38602	AFOS	CTRL	veh
BCL11B	B12	0.126436	AFOS	CTRL	veh
BCL2A1	B12	-0.466957	AFOS	CTRL	veh
BCL2L1	B12	-0.777835	AFOS	CTRL	veh
BCL2L11	B12	0.050398	AFOS	CTRL	veh
BCL2L13	B12	-0.377216	AFOS	CTRL	veh
BCL2L14	B12	-0.209515	AFOS	CTRL	veh
BCL6	B12	-0.571406	AFOS	CTRL	veh
BCL9L	B12	0.0694856	AFOS	CTRL	veh
BCO1	B12	2.47487	AFOS	CTRL	veh
BCO2	B12	-0.779299	AFOS	CTRL	veh
BCOR	B12	1.88542	AFOS	CTRL	veh
BDH1	B12	-0.997739	AFOS	CTRL	veh
BDH2	B12	-0.488292	AFOS	CTRL	veh
BDKRB1	B12	-0.458462	AFOS	CTRL	veh
BDKRB2	B12	-0.603449	AFOS	CTRL	veh
BDNF	B12	-0.513769	AFOS	CTRL	veh
BEAN1	B12	-0.57033	AFOS	CTRL	veh
BEND6	B12	0.0921491	AFOS	CTRL	veh
BEND7	B12	1.16448	AFOS	CTRL	veh
BEST1	B12	-0.685954	AFOS	CTRL	veh
BEST3	B12	NA	AFOS	CTRL	veh
BGLAP	B12	-1.05863	AFOS	CTRL	veh
BGN	B12	-0.538649	AFOS	CTRL	veh
BHLHE40	B12	0.289158	AFOS	CTRL	veh
BHLHE41	B12	-0.916139	AFOS	CTRL	veh
BICD1	B12	-1.06672	AFOS	CTRL	veh
BICD2	B12	1.30929	AFOS	CTRL	veh
BIK	B12	0.427117	AFOS	CTRL	veh
BIN1	B12	-1.06524	AFOS	CTRL	veh
BIN3	B12	-0.665914	AFOS	CTRL	veh
BIRC3	B12	-0.425934	AFOS	CTRL	veh
BIRC7	B12	-0.630289	AFOS	CTRL	veh
BLNK	B12	-0.880424	AFOS	CTRL	veh
BLZF1	B12	0.378763	AFOS	CTRL	veh
BMP1	B12	-0.653646	AFOS	CTRL	veh
BMP10	B12	NA	AFOS	CTRL	veh
BMP2	B12	1.21896	AFOS	CTRL	veh
BMP6	B12	-0.443583	AFOS	CTRL	veh
BMX	B12	-0.602183	AFOS	CTRL	veh
BNIP3	B12	-0.0145227	AFOS	CTRL	veh
BNIP3L	B12	-0.269304	AFOS	CTRL	veh
BOD1L1	B12	1.78074	AFOS	CTRL	veh
BORCS7	B12	-1.55004	AFOS	CTRL	veh
BPGM	B12	0.069149	AFOS	CTRL	veh
BPIFC	B12	-0.353553	AFOS	CTRL	veh
BRD1	B12	0.276484	AFOS	CTRL	veh
BRE	B12	-1.44113	AFOS	CTRL	veh
BRI3	B12	-1.17227	AFOS	CTRL	veh
BROX	B12	0.492116	AFOS	CTRL	veh
BRPF3	B12	0.874964	AFOS	CTRL	veh
BRWD1	B12	1.43956	AFOS	CTRL	veh
BSDC1	B12	0.281753	AFOS	CTRL	veh
BSN	B12	0.843524	AFOS	CTRL	veh
BSPRY	B12	-0.24093	AFOS	CTRL	veh
BST2	B12	-0.757827	AFOS	CTRL	veh
BTBD10	B12	0.0431808	AFOS	CTRL	veh
BTBD11	B12	-0.625923	AFOS	CTRL	veh
BTBD16	B12	-0.872721	AFOS	CTRL	veh
BTBD9	B12	0.667414	AFOS	CTRL	veh
BTC	B12	-0.492033	AFOS	CTRL	veh
BTD	B12	-0.55974	AFOS	CTRL	veh
BTG1	B12	-0.23028	AFOS	CTRL	veh
BTN2A1	B12	-0.18541	AFOS	CTRL	veh
BTN2A2	B12	-0.803455	AFOS	CTRL	veh
BTN3A1	B12	0.089528	AFOS	CTRL	veh
BTN3A2	B12	-0.294183	AFOS	CTRL	veh
BTN3A3	B12	-0.88243	AFOS	CTRL	veh
BTRC	B12	1.35507	AFOS	CTRL	veh
BVES	B12	1.02887	AFOS	CTRL	veh
C10orf10	B12	-0.613368	AFOS	CTRL	veh
C10orf11	B12	NA	AFOS	CTRL	veh
C10orf12	B12	1.01732	AFOS	CTRL	veh
C10orf142	B12	NA	AFOS	CTRL	veh
C10orf54	B12	-0.857886	AFOS	CTRL	veh
C10orf90	B12	-0.516628	AFOS	CTRL	veh
C11orf68	B12	-0.771619	AFOS	CTRL	veh
C11orf86	B12	-0.607305	AFOS	CTRL	veh
C11orf87	B12	0.237467	AFOS	CTRL	veh
C11orf91	B12	0.532586	AFOS	CTRL	veh
C11orf96	B12	-0.951258	AFOS	CTRL	veh
C12orf42	B12	NA	AFOS	CTRL	veh
C12orf75	B12	-0.59533	AFOS	CTRL	veh
C14orf159	B12	-0.311108	AFOS	CTRL	veh
C14orf166	B12	-0.86085	AFOS	CTRL	veh
C15orf39	B12	-0.682192	AFOS	CTRL	veh
C15orf48	B12	-0.384673	AFOS	CTRL	veh
C15orf52	B12	-0.708742	AFOS	CTRL	veh
C16orf74	B12	-0.757679	AFOS	CTRL	veh
C17orf107	B12	-0.500926	AFOS	CTRL	veh
C17orf67	B12	0.355621	AFOS	CTRL	veh
C18orf25	B12	0.854991	AFOS	CTRL	veh
C19orf33	B12	-0.732484	AFOS	CTRL	veh
C19orf54	B12	-0.697221	AFOS	CTRL	veh
C19orf66	B12	-1.05599	AFOS	CTRL	veh
C1GALT1	B12	1.51386	AFOS	CTRL	veh
C1orf106	B12	-0.543551	AFOS	CTRL	veh
C1orf116	B12	-0.660631	AFOS	CTRL	veh
C1orf186	B12	NA	AFOS	CTRL	veh
C1orf198	B12	-0.0379138	AFOS	CTRL	veh
C1orf226	B12	-0.454486	AFOS	CTRL	veh
C1orf27	B12	-0.125341	AFOS	CTRL	veh
C1orf50	B12	-0.636294	AFOS	CTRL	veh
C1orf54	B12	-0.00541736	AFOS	CTRL	veh
C1orf74	B12	-0.751998	AFOS	CTRL	veh
C1orf94	B12	NA	AFOS	CTRL	veh
C1QTNF1	B12	0.401648	AFOS	CTRL	veh
C1QTNF7	B12	NA	AFOS	CTRL	veh
C1R	B12	-0.513534	AFOS	CTRL	veh
C1S	B12	-0.878748	AFOS	CTRL	veh
C2	B12	-0.923298	AFOS	CTRL	veh
C20orf141	B12	-0.412792	AFOS	CTRL	veh
C20orf194	B12	1.25292	AFOS	CTRL	veh
C21orf2	B12	-0.293994	AFOS	CTRL	veh
C22orf23	B12	-0.110637	AFOS	CTRL	veh
C22orf29	B12	0.0262311	AFOS	CTRL	veh
C2CD3	B12	-0.181541	AFOS	CTRL	veh
C2CD4B	B12	-0.491839	AFOS	CTRL	veh
C2CD4D	B12	-0.353553	AFOS	CTRL	veh
C2orf54	B12	-0.668692	AFOS	CTRL	veh
C2orf82	B12	-0.0882831	AFOS	CTRL	veh
C3	B12	-0.812656	AFOS	CTRL	veh
C3AR1	B12	-0.725549	AFOS	CTRL	veh
C3orf36	B12	-0.442456	AFOS	CTRL	veh
C3orf38	B12	-0.597562	AFOS	CTRL	veh
C3orf52	B12	-0.755042	AFOS	CTRL	veh
C3orf62	B12	-0.780024	AFOS	CTRL	veh
C4A	B12	-1.01802	AFOS	CTRL	veh
C4B	B12	-0.823175	AFOS	CTRL	veh
C4BPB	B12	-0.376047	AFOS	CTRL	veh
C4orf17	B12	-0.530551	AFOS	CTRL	veh
C4orf19	B12	0.0937581	AFOS	CTRL	veh
C4orf26	B12	-0.353553	AFOS	CTRL	veh
C4orf33	B12	-0.36208	AFOS	CTRL	veh
C5orf15	B12	-1.38647	AFOS	CTRL	veh
C5orf22	B12	0.505277	AFOS	CTRL	veh
C5orf45	B12	-0.479305	AFOS	CTRL	veh
C5orf46	B12	NA	AFOS	CTRL	veh
C5orf56	B12	-0.643556	AFOS	CTRL	veh
C5orf67	B12	-0.510781	AFOS	CTRL	veh
C6orf106	B12	0.178831	AFOS	CTRL	veh
C6orf132	B12	-0.621437	AFOS	CTRL	veh
C6orf141	B12	-0.353553	AFOS	CTRL	veh
C6orf15	B12	-0.510181	AFOS	CTRL	veh
C6orf222	B12	-0.481551	AFOS	CTRL	veh
C6orf62	B12	-0.35605	AFOS	CTRL	veh
C7	B12	-0.537244	AFOS	CTRL	veh
C7orf43	B12	-0.6411	AFOS	CTRL	veh
C7orf57	B12	0.788894	AFOS	CTRL	veh
C7orf60	B12	-0.283527	AFOS	CTRL	veh
C8orf22	B12	-0.516749	AFOS	CTRL	veh
C8orf4	B12	-0.55619	AFOS	CTRL	veh
C8orf46	B12	-0.852336	AFOS	CTRL	veh
C8orf58	B12	-2.07544	AFOS	CTRL	veh
C9	B12	-0.492033	AFOS	CTRL	veh
C9orf135	B12	-0.39441	AFOS	CTRL	veh
C9orf153	B12	2.34978	AFOS	CTRL	veh
C9orf3	B12	-0.718862	AFOS	CTRL	veh
C9orf84	B12	-0.460625	AFOS	CTRL	veh
C9orf85	B12	-0.446351	AFOS	CTRL	veh
CA10	B12	-0.705979	AFOS	CTRL	veh
CAB39	B12	1.32826	AFOS	CTRL	veh
CABLES1	B12	-0.467879	AFOS	CTRL	veh
CACFD1	B12	-0.0936011	AFOS	CTRL	veh
CACNA1C	B12	-0.360671	AFOS	CTRL	veh
CACNA1E	B12	-0.359242	AFOS	CTRL	veh
CACNA1G	B12	-0.662908	AFOS	CTRL	veh
CACNA2D3	B12	-0.474097	AFOS	CTRL	veh
CACNG4	B12	-0.466385	AFOS	CTRL	veh
CACNG6	B12	0.626524	AFOS	CTRL	veh
CACUL1	B12	0.710837	AFOS	CTRL	veh
CADM4	B12	-0.904662	AFOS	CTRL	veh
CALB1	B12	0.734508	AFOS	CTRL	veh
CALB2	B12	-0.842834	AFOS	CTRL	veh
CALCB	B12	-1.48297	AFOS	CTRL	veh
CALCOCO1	B12	-0.371828	AFOS	CTRL	veh
CALCOCO2	B12	0.0906106	AFOS	CTRL	veh
CALD1	B12	0.213499	AFOS	CTRL	veh
CALHM3	B12	-0.456015	AFOS	CTRL	veh
CALM2	B12	-1.30422	AFOS	CTRL	veh
CAMK1D	B12	0.124946	AFOS	CTRL	veh
CAMK1G	B12	-0.576128	AFOS	CTRL	veh
CAMK2A	B12	-0.708094	AFOS	CTRL	veh
CAMK2N1	B12	-0.69554	AFOS	CTRL	veh
CAMK2N2	B12	-0.256129	AFOS	CTRL	veh
CAP1	B12	1.04656	AFOS	CTRL	veh
CAPG	B12	-0.697586	AFOS	CTRL	veh
CAPN13	B12	-0.627245	AFOS	CTRL	veh
CAPN14	B12	-0.773032	AFOS	CTRL	veh
CAPN15	B12	-0.784433	AFOS	CTRL	veh
CAPN2	B12	-0.215341	AFOS	CTRL	veh
CAPN3	B12	-1.03296	AFOS	CTRL	veh
CAPN8	B12	-0.979038	AFOS	CTRL	veh
CAPNS1	B12	-0.495118	AFOS	CTRL	veh
CAPNS2	B12	0.133728	AFOS	CTRL	veh
CAPS	B12	-0.78712	AFOS	CTRL	veh
CARD10	B12	-0.817779	AFOS	CTRL	veh
CARD16	B12	-0.56808	AFOS	CTRL	veh
CARD6	B12	-0.643274	AFOS	CTRL	veh
CARKD	B12	-0.901866	AFOS	CTRL	veh
CASP1	B12	-0.65078	AFOS	CTRL	veh
CASP10	B12	-0.802113	AFOS	CTRL	veh
CASP4	B12	-0.470316	AFOS	CTRL	veh
CASP7	B12	-0.803982	AFOS	CTRL	veh
CASP8	B12	-0.739056	AFOS	CTRL	veh
CASQ1	B12	-0.56186	AFOS	CTRL	veh
CASQ2	B12	-0.353553	AFOS	CTRL	veh
CAST	B12	1.59831	AFOS	CTRL	veh
CATSPER1	B12	-0.419791	AFOS	CTRL	veh
CATSPER3	B12	1.06626	AFOS	CTRL	veh
CBWD5	B12	-1.24123	AFOS	CTRL	veh
CCBE1	B12	-0.607968	AFOS	CTRL	veh
CCDC120	B12	1.39429	AFOS	CTRL	veh
CCDC127	B12	0.368846	AFOS	CTRL	veh
CCDC136	B12	-0.0969927	AFOS	CTRL	veh
CCDC141	B12	-0.793494	AFOS	CTRL	veh
CCDC146	B12	-0.0475415	AFOS	CTRL	veh
CCDC149	B12	0.634638	AFOS	CTRL	veh
CCDC159	B12	-0.810239	AFOS	CTRL	veh
CCDC190	B12	-0.353553	AFOS	CTRL	veh
CCDC28A	B12	-0.418558	AFOS	CTRL	veh
CCDC33	B12	-0.470501	AFOS	CTRL	veh
CCDC50	B12	-0.0487482	AFOS	CTRL	veh
CCDC51	B12	-1.07089	AFOS	CTRL	veh
CCDC6	B12	1.14577	AFOS	CTRL	veh
CCDC71L	B12	-1.03541	AFOS	CTRL	veh
CCDC85C	B12	-0.246582	AFOS	CTRL	veh
CCDC91	B12	1.21362	AFOS	CTRL	veh
CCDC92	B12	-0.0259688	AFOS	CTRL	veh
CCDC93	B12	1.0184	AFOS	CTRL	veh
CCIN	B12	-0.162874	AFOS	CTRL	veh
CCK	B12	NA	AFOS	CTRL	veh
CCL17	B12	0.508959	AFOS	CTRL	veh
CCL2	B12	-0.922154	AFOS	CTRL	veh
CCL20	B12	-0.875243	AFOS	CTRL	veh
CCL21	B12	-0.714259	AFOS	CTRL	veh
CCL22	B12	-0.353553	AFOS	CTRL	veh
CCL24	B12	NA	AFOS	CTRL	veh
CCL25	B12	-0.687602	AFOS	CTRL	veh
CCL26	B12	-0.470126	AFOS	CTRL	veh
CCL28	B12	-0.76085	AFOS	CTRL	veh
CCL3	B12	-0.53007	AFOS	CTRL	veh
CCL3L1	B12	0.450293	AFOS	CTRL	veh
CCL3L3	B12	0.691636	AFOS	CTRL	veh
CCL4	B12	-0.270175	AFOS	CTRL	veh
CCL4L2	B12	-0.536558	AFOS	CTRL	veh
CCL5	B12	-0.572489	AFOS	CTRL	veh
CCL7	B12	-0.353553	AFOS	CTRL	veh
CCL8	B12	-0.746933	AFOS	CTRL	veh
CCM2L	B12	-1.25347	AFOS	CTRL	veh
CCNA1	B12	-0.396513	AFOS	CTRL	veh
CCND1	B12	-0.90674	AFOS	CTRL	veh
CCNDBP1	B12	0.15389	AFOS	CTRL	veh
CCNI	B12	1.47953	AFOS	CTRL	veh
CCNL1	B12	-0.495761	AFOS	CTRL	veh
CCNYL1	B12	-0.143354	AFOS	CTRL	veh
CCR1	B12	-0.709512	AFOS	CTRL	veh
CCR3	B12	NA	AFOS	CTRL	veh
CCRL2	B12	-0.353553	AFOS	CTRL	veh
CD101	B12	2.47487	AFOS	CTRL	veh
CD151	B12	-0.581936	AFOS	CTRL	veh
CD163	B12	0.343658	AFOS	CTRL	veh
CD163L1	B12	-0.353553	AFOS	CTRL	veh
CD177	B12	-0.612092	AFOS	CTRL	veh
CD180	B12	-0.860484	AFOS	CTRL	veh
CD22	B12	-0.917739	AFOS	CTRL	veh
CD24	B12	-0.641981	AFOS	CTRL	veh
CD247	B12	0.108798	AFOS	CTRL	veh
CD274	B12	-0.551238	AFOS	CTRL	veh
CD276	B12	-0.487822	AFOS	CTRL	veh
CD2AP	B12	1.00055	AFOS	CTRL	veh
CD300C	B12	-0.0378187	AFOS	CTRL	veh
CD300LB	B12	-0.353553	AFOS	CTRL	veh
CD33	B12	-0.353553	AFOS	CTRL	veh
CD34	B12	-0.92648	AFOS	CTRL	veh
CD38	B12	-0.575529	AFOS	CTRL	veh
CD40	B12	-0.514752	AFOS	CTRL	veh
CD44	B12	-0.513868	AFOS	CTRL	veh
CD46	B12	-0.177905	AFOS	CTRL	veh
CD47	B12	-0.968882	AFOS	CTRL	veh
CD52	B12	-0.493765	AFOS	CTRL	veh
CD55	B12	-1.06175	AFOS	CTRL	veh
CD59	B12	-1.30095	AFOS	CTRL	veh
CD63	B12	-1.14357	AFOS	CTRL	veh
CD68	B12	-0.31524	AFOS	CTRL	veh
CD70	B12	-0.71649	AFOS	CTRL	veh
CD74	B12	-0.544164	AFOS	CTRL	veh
CD80	B12	-0.6735	AFOS	CTRL	veh
CD81	B12	-1.0627	AFOS	CTRL	veh
CD82	B12	-0.859755	AFOS	CTRL	veh
CD86	B12	NA	AFOS	CTRL	veh
CD9	B12	-1.15823	AFOS	CTRL	veh
CD96	B12	-0.480446	AFOS	CTRL	veh
CDA	B12	-0.618812	AFOS	CTRL	veh
CDC42BPA	B12	1.73752	AFOS	CTRL	veh
CDC42BPG	B12	-0.291336	AFOS	CTRL	veh
CDC42EP2	B12	-0.553778	AFOS	CTRL	veh
CDC42EP3	B12	-0.79942	AFOS	CTRL	veh
CDC42EP4	B12	-0.649769	AFOS	CTRL	veh
CDCP1	B12	-0.627975	AFOS	CTRL	veh
CDH1	B12	-0.517792	AFOS	CTRL	veh
CDH10	B12	-0.585429	AFOS	CTRL	veh
CDH13	B12	-0.720405	AFOS	CTRL	veh
CDH16	B12	-0.353553	AFOS	CTRL	veh
CDH2	B12	-0.301959	AFOS	CTRL	veh
CDH24	B12	-1.50933	AFOS	CTRL	veh
CDH3	B12	-0.354542	AFOS	CTRL	veh
CDH4	B12	-0.860142	AFOS	CTRL	veh
CDH5	B12	-0.907803	AFOS	CTRL	veh
CDH6	B12	-0.0109189	AFOS	CTRL	veh
CDHR4	B12	0.540258	AFOS	CTRL	veh
CDIP1	B12	-0.893679	AFOS	CTRL	veh
CDK14	B12	0.0927272	AFOS	CTRL	veh
CDK17	B12	1.10683	AFOS	CTRL	veh
CDK18	B12	-0.656251	AFOS	CTRL	veh
CDKAL1	B12	-0.514592	AFOS	CTRL	veh
CDKN1A	B12	-0.697148	AFOS	CTRL	veh
CDKN2A	B12	-1.33781	AFOS	CTRL	veh
CDKN2AIP	B12	-0.288959	AFOS	CTRL	veh
CDKN2B	B12	-0.533508	AFOS	CTRL	veh
CDR2L	B12	0.231913	AFOS	CTRL	veh
CDRT1	B12	-0.960583	AFOS	CTRL	veh
CDRT4	B12	-0.502234	AFOS	CTRL	veh
CDSN	B12	NA	AFOS	CTRL	veh
CDV3	B12	-0.235438	AFOS	CTRL	veh
CDYL	B12	-0.223752	AFOS	CTRL	veh
CEACAM1	B12	-0.869591	AFOS	CTRL	veh
CEACAM19	B12	-0.962057	AFOS	CTRL	veh
CEACAM3	B12	NA	AFOS	CTRL	veh
CEACAM5	B12	-0.353553	AFOS	CTRL	veh
CEACAM6	B12	-0.528089	AFOS	CTRL	veh
CEBPB	B12	-1.0314	AFOS	CTRL	veh
CEL	B12	-1.00836	AFOS	CTRL	veh
CELA1	B12	-0.353553	AFOS	CTRL	veh
CELF6	B12	-0.572634	AFOS	CTRL	veh
CELSR2	B12	1.1311	AFOS	CTRL	veh
CEMIP	B12	-0.675038	AFOS	CTRL	veh
CEP170B	B12	0.694073	AFOS	CTRL	veh
CERCAM	B12	-0.728465	AFOS	CTRL	veh
CES1	B12	-0.530055	AFOS	CTRL	veh
CES2	B12	-0.553957	AFOS	CTRL	veh
CFAP44	B12	-0.164319	AFOS	CTRL	veh
CFAP45	B12	0.5396	AFOS	CTRL	veh
CFAP53	B12	-1.19504	AFOS	CTRL	veh
CFAP57	B12	-0.554697	AFOS	CTRL	veh
CFAP58	B12	0.115349	AFOS	CTRL	veh
CFAP70	B12	0.0592859	AFOS	CTRL	veh
CFB	B12	-0.675462	AFOS	CTRL	veh
CFI	B12	-0.902747	AFOS	CTRL	veh
CFL2	B12	-0.213179	AFOS	CTRL	veh
CFLAR	B12	-0.0332784	AFOS	CTRL	veh
CGN	B12	1.09271	AFOS	CTRL	veh
CH17-5A7.1	B12	-0.0724924	AFOS	CTRL	veh
CH507-42P11.8	B12	-0.628373	AFOS	CTRL	veh
CH507-9B2.9	B12	-0.912686	AFOS	CTRL	veh
CHAT	B12	-0.44681	AFOS	CTRL	veh
CHD6	B12	1.37097	AFOS	CTRL	veh
CHI3L1	B12	-0.985093	AFOS	CTRL	veh
CHI3L2	B12	-0.856891	AFOS	CTRL	veh
CHIC1	B12	-0.0114608	AFOS	CTRL	veh
CHIC2	B12	-0.759672	AFOS	CTRL	veh
CHIT1	B12	-0.690492	AFOS	CTRL	veh
CHKA	B12	-0.196344	AFOS	CTRL	veh
CHMP1B	B12	-0.474221	AFOS	CTRL	veh
CHMP4B	B12	-1.35687	AFOS	CTRL	veh
CHMP4C	B12	2.47487	AFOS	CTRL	veh
CHMP5	B12	-1.05055	AFOS	CTRL	veh
CHP1	B12	1.42009	AFOS	CTRL	veh
CHPF	B12	-1.17682	AFOS	CTRL	veh
CHPF2	B12	-1.48671	AFOS	CTRL	veh
CHRNA9	B12	-0.412023	AFOS	CTRL	veh
CHST1	B12	-0.466939	AFOS	CTRL	veh
CHST15	B12	-0.109375	AFOS	CTRL	veh
CHST2	B12	-1.03367	AFOS	CTRL	veh
CHST3	B12	-0.109853	AFOS	CTRL	veh
CIART	B12	-0.976027	AFOS	CTRL	veh
CIB1	B12	-0.765533	AFOS	CTRL	veh
CIC	B12	1.03318	AFOS	CTRL	veh
CILP	B12	-0.491943	AFOS	CTRL	veh
CIR1	B12	-0.449207	AFOS	CTRL	veh
CIRBP	B12	-0.907876	AFOS	CTRL	veh
CITED2	B12	-0.276964	AFOS	CTRL	veh
CITED4	B12	0.650254	AFOS	CTRL	veh
CLC	B12	-0.353553	AFOS	CTRL	veh
CLCA2	B12	-0.830239	AFOS	CTRL	veh
CLCF1	B12	-0.480397	AFOS	CTRL	veh
CLDN11	B12	-1.14534	AFOS	CTRL	veh
CLDN12	B12	0.783452	AFOS	CTRL	veh
CLDN14	B12	NA	AFOS	CTRL	veh
CLDN15	B12	-0.0723775	AFOS	CTRL	veh
CLDN2	B12	-0.355167	AFOS	CTRL	veh
CLDN22	B12	NA	AFOS	CTRL	veh
CLDN4	B12	-0.532703	AFOS	CTRL	veh
CLDN9	B12	0.52313	AFOS	CTRL	veh
CLEC12A	B12	NA	AFOS	CTRL	veh
CLEC12B	B12	NA	AFOS	CTRL	veh
CLEC16A	B12	0.334332	AFOS	CTRL	veh
CLEC17A	B12	-0.580965	AFOS	CTRL	veh
CLEC18B	B12	-0.152993	AFOS	CTRL	veh
CLEC2B	B12	NA	AFOS	CTRL	veh
CLEC3B	B12	-0.936683	AFOS	CTRL	veh
CLGN	B12	-0.463483	AFOS	CTRL	veh
CLIC1	B12	-0.303882	AFOS	CTRL	veh
CLIC2	B12	-1.0235	AFOS	CTRL	veh
CLIC4	B12	-0.0694859	AFOS	CTRL	veh
CLIC5	B12	-0.878109	AFOS	CTRL	veh
CLIP1	B12	1.59619	AFOS	CTRL	veh
CLIP4	B12	-0.859099	AFOS	CTRL	veh
CLMN	B12	0.727115	AFOS	CTRL	veh
CLNK	B12	-0.474176	AFOS	CTRL	veh
CLSTN1	B12	1.08192	AFOS	CTRL	veh
CLSTN2	B12	-0.834028	AFOS	CTRL	veh
CLTB	B12	-1.43127	AFOS	CTRL	veh
CLU	B12	-0.922715	AFOS	CTRL	veh
CMIP	B12	0.861374	AFOS	CTRL	veh
CMPK2	B12	-0.766928	AFOS	CTRL	veh
CMTM3	B12	-0.279219	AFOS	CTRL	veh
CMTM6	B12	0.318353	AFOS	CTRL	veh
CMTM7	B12	-1.05608	AFOS	CTRL	veh
CMTR1	B12	-0.691916	AFOS	CTRL	veh
CMYA5	B12	1.0841	AFOS	CTRL	veh
CNGA3	B12	-0.713888	AFOS	CTRL	veh
CNIH3	B12	0.321546	AFOS	CTRL	veh
CNKSR1	B12	-0.184341	AFOS	CTRL	veh
CNKSR3	B12	0.12182	AFOS	CTRL	veh
CNN1	B12	-0.655348	AFOS	CTRL	veh
CNN3	B12	-0.10198	AFOS	CTRL	veh
CNNM3	B12	0.200927	AFOS	CTRL	veh
CNNM4	B12	0.694351	AFOS	CTRL	veh
CNOT4	B12	0.756297	AFOS	CTRL	veh
CNP	B12	-1.17849	AFOS	CTRL	veh
CNST	B12	-0.0851125	AFOS	CTRL	veh
CNTD2	B12	-0.310046	AFOS	CTRL	veh
CNTNAP3	B12	-0.665318	AFOS	CTRL	veh
CNTNAP3B	B12	-0.606956	AFOS	CTRL	veh
CNTNAP4	B12	-0.353553	AFOS	CTRL	veh
COA1	B12	-0.0667143	AFOS	CTRL	veh
COASY	B12	-0.731332	AFOS	CTRL	veh
COG1	B12	-0.545937	AFOS	CTRL	veh
COG5	B12	1.73942	AFOS	CTRL	veh
COL11A2	B12	0.207996	AFOS	CTRL	veh
COL13A1	B12	-0.517093	AFOS	CTRL	veh
COL15A1	B12	-0.0913269	AFOS	CTRL	veh
COL16A1	B12	-0.784271	AFOS	CTRL	veh
COL17A1	B12	-0.553244	AFOS	CTRL	veh
COL18A1	B12	-0.625454	AFOS	CTRL	veh
COL1A1	B12	-0.546805	AFOS	CTRL	veh
COL22A1	B12	-0.353553	AFOS	CTRL	veh
COL27A1	B12	-0.0746155	AFOS	CTRL	veh
COL4A1	B12	-0.610878	AFOS	CTRL	veh
COL4A2	B12	-0.582641	AFOS	CTRL	veh
COL4A3	B12	-0.739239	AFOS	CTRL	veh
COL4A4	B12	-0.475385	AFOS	CTRL	veh
COL4A6	B12	-0.45655	AFOS	CTRL	veh
COL5A1	B12	-0.316699	AFOS	CTRL	veh
COL6A1	B12	0.313055	AFOS	CTRL	veh
COL6A2	B12	-0.280447	AFOS	CTRL	veh
COL6A3	B12	-0.565118	AFOS	CTRL	veh
COL7A1	B12	-0.52458	AFOS	CTRL	veh
COL9A1	B12	0.152909	AFOS	CTRL	veh
COL9A3	B12	-0.924245	AFOS	CTRL	veh
COLEC12	B12	-0.761307	AFOS	CTRL	veh
COMT	B12	-1.42909	AFOS	CTRL	veh
COQ10B	B12	-0.733406	AFOS	CTRL	veh
CORO2A	B12	0.627974	AFOS	CTRL	veh
CORO2B	B12	-0.17959	AFOS	CTRL	veh
CORO6	B12	-1.34247	AFOS	CTRL	veh
CORO7	B12	0.269129	AFOS	CTRL	veh
CORO7-PAM16	B12	0.293304	AFOS	CTRL	veh
COTL1	B12	-1.37424	AFOS	CTRL	veh
COX6B2	B12	0.251806	AFOS	CTRL	veh
CPA2	B12	-0.590587	AFOS	CTRL	veh
CPA4	B12	-0.504706	AFOS	CTRL	veh
CPA5	B12	-0.44681	AFOS	CTRL	veh
CPA6	B12	-0.353553	AFOS	CTRL	veh
CPEB2	B12	0.362897	AFOS	CTRL	veh
CPEB4	B12	-0.0861763	AFOS	CTRL	veh
CPM	B12	1.09957	AFOS	CTRL	veh
CPNE1	B12	-1.49527	AFOS	CTRL	veh
CPPED1	B12	-0.580142	AFOS	CTRL	veh
CPTP	B12	-0.973833	AFOS	CTRL	veh
CPVL	B12	1.38267	AFOS	CTRL	veh
CPXCR1	B12	-0.650998	AFOS	CTRL	veh
CPZ	B12	0.433877	AFOS	CTRL	veh
CRADD	B12	-0.48181	AFOS	CTRL	veh
CRB2	B12	-1.00577	AFOS	CTRL	veh
CRCT1	B12	NA	AFOS	CTRL	veh
CREB3L1	B12	-0.2359	AFOS	CTRL	veh
CREB5	B12	-0.341455	AFOS	CTRL	veh
CREBL2	B12	1.18708	AFOS	CTRL	veh
CREBRF	B12	0.0330278	AFOS	CTRL	veh
CREG2	B12	-0.760488	AFOS	CTRL	veh
CRHBP	B12	-0.538578	AFOS	CTRL	veh
CRHR2	B12	0.288592	AFOS	CTRL	veh
CRIM1	B12	-0.719158	AFOS	CTRL	veh
CRIPT	B12	-0.593114	AFOS	CTRL	veh
CRISPLD2	B12	-0.907192	AFOS	CTRL	veh
CRLF1	B12	0.00816537	AFOS	CTRL	veh
CRNN	B12	NA	AFOS	CTRL	veh
CRP	B12	NA	AFOS	CTRL	veh
CRTAC1	B12	-0.584028	AFOS	CTRL	veh
CRTC2	B12	-0.770346	AFOS	CTRL	veh
CRYAB	B12	-0.671268	AFOS	CTRL	veh
CRYBB2	B12	-0.695466	AFOS	CTRL	veh
CRYBB3	B12	-1.35528	AFOS	CTRL	veh
CRYGC	B12	-0.353553	AFOS	CTRL	veh
CSAG1	B12	NA	AFOS	CTRL	veh
CSDC2	B12	-0.478657	AFOS	CTRL	veh
CSF1	B12	-0.922172	AFOS	CTRL	veh
CSF1R	B12	0.172892	AFOS	CTRL	veh
CSF2	B12	-0.548963	AFOS	CTRL	veh
CSF2RB	B12	-0.662957	AFOS	CTRL	veh
CSMD2	B12	-1.02722	AFOS	CTRL	veh
CSMD3	B12	0.361507	AFOS	CTRL	veh
CSNK1A1	B12	0.237906	AFOS	CTRL	veh
CSNK1D	B12	-0.378423	AFOS	CTRL	veh
CSNK1G1	B12	1.03061	AFOS	CTRL	veh
CSRNP1	B12	-1.10114	AFOS	CTRL	veh
CSRP1	B12	-0.298319	AFOS	CTRL	veh
CSRP3	B12	-0.456165	AFOS	CTRL	veh
CST1	B12	-0.464634	AFOS	CTRL	veh
CST2	B12	-0.458051	AFOS	CTRL	veh
CST3	B12	-0.992429	AFOS	CTRL	veh
CST4	B12	-0.476999	AFOS	CTRL	veh
CST5	B12	-0.467774	AFOS	CTRL	veh
CST6	B12	-0.507205	AFOS	CTRL	veh
CTAGE1	B12	-0.68844	AFOS	CTRL	veh
CTB-102L5.4	B12	-0.124948	AFOS	CTRL	veh
CTBS	B12	-1.00427	AFOS	CTRL	veh
CTD-3088G3.8	B12	-0.885922	AFOS	CTRL	veh
CTDSPL	B12	-0.672588	AFOS	CTRL	veh
CTGF	B12	-0.52595	AFOS	CTRL	veh
CTIF	B12	1.13914	AFOS	CTRL	veh
CTNNAL1	B12	-0.732373	AFOS	CTRL	veh
CTNNB1	B12	-1.10321	AFOS	CTRL	veh
CTSA	B12	-1.61591	AFOS	CTRL	veh
CTSB	B12	-0.704999	AFOS	CTRL	veh
CTSD	B12	-1.19267	AFOS	CTRL	veh
CTSE	B12	-0.491833	AFOS	CTRL	veh
CTSF	B12	-1.58965	AFOS	CTRL	veh
CTSH	B12	-0.878501	AFOS	CTRL	veh
CTSL	B12	-1.31344	AFOS	CTRL	veh
CTSO	B12	-0.861124	AFOS	CTRL	veh
CTSS	B12	-0.703448	AFOS	CTRL	veh
CTSV	B12	-0.392786	AFOS	CTRL	veh
CTTN	B12	-0.104106	AFOS	CTRL	veh
CTTNBP2NL	B12	0.238969	AFOS	CTRL	veh
CUTC	B12	-0.346046	AFOS	CTRL	veh
CUX1	B12	0.96196	AFOS	CTRL	veh
CWF19L2	B12	-0.313408	AFOS	CTRL	veh
CX3CL1	B12	-0.670136	AFOS	CTRL	veh
CXCL10	B12	-0.756808	AFOS	CTRL	veh
CXCL11	B12	-0.60901	AFOS	CTRL	veh
CXCL13	B12	0.213482	AFOS	CTRL	veh
CXCL14	B12	NA	AFOS	CTRL	veh
CXCL2	B12	-0.652963	AFOS	CTRL	veh
CXCL3	B12	-0.795513	AFOS	CTRL	veh
CXCL8	B12	-0.756864	AFOS	CTRL	veh
CXCL9	B12	-0.779143	AFOS	CTRL	veh
CXCR4	B12	-0.69967	AFOS	CTRL	veh
CXCR5	B12	-0.247093	AFOS	CTRL	veh
CXorf23	B12	0.0175865	AFOS	CTRL	veh
CXorf38	B12	0.926081	AFOS	CTRL	veh
CXorf49	B12	1.39376	AFOS	CTRL	veh
CXXC5	B12	-0.954691	AFOS	CTRL	veh
CYB561D1	B12	0.357783	AFOS	CTRL	veh
CYB5R1	B12	-0.885468	AFOS	CTRL	veh
CYB5R2	B12	1.02028	AFOS	CTRL	veh
CYB5R3	B12	0.166086	AFOS	CTRL	veh
CYGB	B12	-0.893284	AFOS	CTRL	veh
CYLD	B12	-0.276539	AFOS	CTRL	veh
CYP19A1	B12	-0.72047	AFOS	CTRL	veh
CYP1A1	B12	-1.51193	AFOS	CTRL	veh
CYP24A1	B12	-0.507566	AFOS	CTRL	veh
CYP26B1	B12	-0.879158	AFOS	CTRL	veh
CYP27A1	B12	0.435472	AFOS	CTRL	veh
CYP2J2	B12	-0.759956	AFOS	CTRL	veh
CYP4B1	B12	-0.901317	AFOS	CTRL	veh
CYP4F11	B12	-0.716167	AFOS	CTRL	veh
CYP4F12	B12	-1.1743	AFOS	CTRL	veh
CYP4F3	B12	-0.784496	AFOS	CTRL	veh
CYP4V2	B12	-0.0887026	AFOS	CTRL	veh
CYP51A1	B12	0.97679	AFOS	CTRL	veh
CYP8B1	B12	1.18945	AFOS	CTRL	veh
CYR61	B12	-1.0102	AFOS	CTRL	veh
CYSRT1	B12	-1.20776	AFOS	CTRL	veh
CYSTM1	B12	-0.794425	AFOS	CTRL	veh
CYTH1	B12	-0.783996	AFOS	CTRL	veh
CYTH3	B12	0.42114	AFOS	CTRL	veh
CYTH4	B12	-0.570496	AFOS	CTRL	veh
DAAM1	B12	0.882111	AFOS	CTRL	veh
DAAM2	B12	1.17959	AFOS	CTRL	veh
DAB2	B12	-0.731591	AFOS	CTRL	veh
DACT1	B12	0.212857	AFOS	CTRL	veh
DAG1	B12	-0.454698	AFOS	CTRL	veh
DAGLB	B12	-0.753645	AFOS	CTRL	veh
DAP	B12	0.557304	AFOS	CTRL	veh
DAPK2	B12	-0.625851	AFOS	CTRL	veh
DAPK3	B12	-0.95318	AFOS	CTRL	veh
DAPL1	B12	-0.528428	AFOS	CTRL	veh
DAW1	B12	-0.353553	AFOS	CTRL	veh
DCAF10	B12	0.473204	AFOS	CTRL	veh
DCBLD1	B12	-0.35523	AFOS	CTRL	veh
DCBLD2	B12	-0.794849	AFOS	CTRL	veh
DCDC2	B12	-0.695048	AFOS	CTRL	veh
DCHS2	B12	-0.626854	AFOS	CTRL	veh
DCLK1	B12	0.539663	AFOS	CTRL	veh
DCP1B	B12	-0.155395	AFOS	CTRL	veh
DCST2	B12	-0.579644	AFOS	CTRL	veh
DCUN1D2	B12	-0.108676	AFOS	CTRL	veh
DCUN1D3	B12	-0.693642	AFOS	CTRL	veh
DDAH1	B12	-0.784041	AFOS	CTRL	veh
DDIT3	B12	-0.0301148	AFOS	CTRL	veh
DDIT4	B12	-1.16329	AFOS	CTRL	veh
DDO	B12	-0.904903	AFOS	CTRL	veh
DDR1	B12	-1.52611	AFOS	CTRL	veh
DDR2	B12	-0.627685	AFOS	CTRL	veh
DDX10	B12	-0.644874	AFOS	CTRL	veh
DDX24	B12	-0.826211	AFOS	CTRL	veh
DDX47	B12	-1.65115	AFOS	CTRL	veh
DDX58	B12	-0.817003	AFOS	CTRL	veh
DDX60	B12	-0.809271	AFOS	CTRL	veh
DDX60L	B12	-0.742556	AFOS	CTRL	veh
2020-12-01	B12	NA	AFOS	CTRL	veh
DEDD2	B12	-0.286223	AFOS	CTRL	veh
DEFB1	B12	-0.471915	AFOS	CTRL	veh
DEFB103A	B12	NA	AFOS	CTRL	veh
DEFB124	B12	-0.353553	AFOS	CTRL	veh
DEGS2	B12	1.01647	AFOS	CTRL	veh
DENND2A	B12	-0.576508	AFOS	CTRL	veh
DENND2D	B12	-0.790999	AFOS	CTRL	veh
DENND3	B12	0.124099	AFOS	CTRL	veh
DENND4A	B12	1.44575	AFOS	CTRL	veh
DENND4B	B12	-0.217672	AFOS	CTRL	veh
DENND5A	B12	0.688005	AFOS	CTRL	veh
DEPTOR	B12	-0.0697964	AFOS	CTRL	veh
DES	B12	-0.834458	AFOS	CTRL	veh
DGCR2	B12	0.46167	AFOS	CTRL	veh
DGKA	B12	-0.244085	AFOS	CTRL	veh
DGKG	B12	-0.367231	AFOS	CTRL	veh
DGKI	B12	-0.400131	AFOS	CTRL	veh
DHCR24	B12	0.201694	AFOS	CTRL	veh
DHRS1	B12	0.0302786	AFOS	CTRL	veh
DHRS2	B12	-0.866356	AFOS	CTRL	veh
DHRS3	B12	-0.89473	AFOS	CTRL	veh
DHRS7B	B12	-1.22198	AFOS	CTRL	veh
DHRS9	B12	-0.356247	AFOS	CTRL	veh
DHRSX	B12	-0.855971	AFOS	CTRL	veh
DHX58	B12	-0.700379	AFOS	CTRL	veh
DIABLO	B12	-0.990781	AFOS	CTRL	veh
DIEXF	B12	-0.298006	AFOS	CTRL	veh
DIO2	B12	0.130718	AFOS	CTRL	veh
DIO3	B12	-0.42672	AFOS	CTRL	veh
DIRAS3	B12	NA	AFOS	CTRL	veh
DIRC3	B12	-0.536393	AFOS	CTRL	veh
DISP1	B12	0.0382339	AFOS	CTRL	veh
DKK 1.00	B12	-0.164602	AFOS	CTRL	veh
DKK 3.00	B12	-0.438528	AFOS	CTRL	veh
DLEC1	B12	-1.08147	AFOS	CTRL	veh
DLG1	B12	1.29857	AFOS	CTRL	veh
DLG5	B12	1.23824	AFOS	CTRL	veh
DLGAP4	B12	-0.274488	AFOS	CTRL	veh
DLL4	B12	-0.922376	AFOS	CTRL	veh
DMBT1	B12	-0.240247	AFOS	CTRL	veh
DMGDH	B12	0.688568	AFOS	CTRL	veh
DMRT1	B12	-0.421121	AFOS	CTRL	veh
DMRTA1	B12	-0.00556016	AFOS	CTRL	veh
DNAH3	B12	-0.353553	AFOS	CTRL	veh
DNAH5	B12	0.211116	AFOS	CTRL	veh
DNAJB1	B12	-0.737842	AFOS	CTRL	veh
DNAJB2	B12	0.0357773	AFOS	CTRL	veh
DNAJB4	B12	0.0168889	AFOS	CTRL	veh
DNAJB6	B12	0.0163156	AFOS	CTRL	veh
DNAJB9	B12	-0.782463	AFOS	CTRL	veh
DNAJC13	B12	2.06035	AFOS	CTRL	veh
DNAJC15	B12	-0.353553	AFOS	CTRL	veh
DNAJC5	B12	0.440775	AFOS	CTRL	veh
DNAJC5B	B12	-0.781778	AFOS	CTRL	veh
DNAL4	B12	-0.102111	AFOS	CTRL	veh
DNASE2B	B12	NA	AFOS	CTRL	veh
DNER	B12	-0.953352	AFOS	CTRL	veh
DNM2	B12	-0.955056	AFOS	CTRL	veh
DNMBP	B12	0.327372	AFOS	CTRL	veh
DNPEP	B12	-1.37376	AFOS	CTRL	veh
DNTTIP1	B12	-0.852691	AFOS	CTRL	veh
DOCK2	B12	-0.425197	AFOS	CTRL	veh
DOCK5	B12	1.1065	AFOS	CTRL	veh
DOCK8	B12	-0.0751994	AFOS	CTRL	veh
DOCK9	B12	0.487574	AFOS	CTRL	veh
DOK3	B12	0.75068	AFOS	CTRL	veh
DOK7	B12	-0.172417	AFOS	CTRL	veh
DPF3	B12	-0.698414	AFOS	CTRL	veh
DPP4	B12	-0.652204	AFOS	CTRL	veh
DPP6	B12	-0.353553	AFOS	CTRL	veh
DPYSL2	B12	-0.239908	AFOS	CTRL	veh
DPYSL3	B12	0.973596	AFOS	CTRL	veh
DRAM1	B12	-0.359377	AFOS	CTRL	veh
DRAXIN	B12	-1.26279	AFOS	CTRL	veh
DRC3	B12	-1.2425	AFOS	CTRL	veh
DRD2	B12	0.0773118	AFOS	CTRL	veh
DRGX	B12	-0.353553	AFOS	CTRL	veh
DRP2	B12	-0.744864	AFOS	CTRL	veh
DSCAML1	B12	-0.538437	AFOS	CTRL	veh
DSCR8	B12	2.47487	AFOS	CTRL	veh
DSP	B12	-0.651106	AFOS	CTRL	veh
DST	B12	1.20717	AFOS	CTRL	veh
DSTYK	B12	0.452607	AFOS	CTRL	veh
DTHD1	B12	NA	AFOS	CTRL	veh
DTX2	B12	-1.16345	AFOS	CTRL	veh
DTX3L	B12	-0.680788	AFOS	CTRL	veh
DUOX2	B12	-0.378651	AFOS	CTRL	veh
DUOXA1	B12	0.176026	AFOS	CTRL	veh
DUPD1	B12	0.439789	AFOS	CTRL	veh
DUSP1	B12	-0.0912225	AFOS	CTRL	veh
DUSP10	B12	-0.603949	AFOS	CTRL	veh
DUSP14	B12	-0.949359	AFOS	CTRL	veh
DUSP27	B12	-0.353553	AFOS	CTRL	veh
DUSP3	B12	0.697991	AFOS	CTRL	veh
DUSP4	B12	-0.927412	AFOS	CTRL	veh
DUSP5	B12	-0.680192	AFOS	CTRL	veh
DUSP7	B12	1.16878	AFOS	CTRL	veh
DUSP8	B12	0.713715	AFOS	CTRL	veh
DVL1	B12	-0.46872	AFOS	CTRL	veh
DVL3	B12	1.30794	AFOS	CTRL	veh
DYNC1H1	B12	1.91463	AFOS	CTRL	veh
DYNLL2	B12	-0.403863	AFOS	CTRL	veh
DYNLT3	B12	-0.0397583	AFOS	CTRL	veh
DYRK2	B12	0.498915	AFOS	CTRL	veh
DYSF	B12	-0.844232	AFOS	CTRL	veh
EAPP	B12	-0.516737	AFOS	CTRL	veh
EBI3	B12	-0.729194	AFOS	CTRL	veh
ECE1	B12	-0.512578	AFOS	CTRL	veh
ECHDC2	B12	-0.516518	AFOS	CTRL	veh
ECM1	B12	-0.584806	AFOS	CTRL	veh
ECM2	B12	-0.216848	AFOS	CTRL	veh
ECSCR	B12	-0.656871	AFOS	CTRL	veh
EDAR	B12	-0.571151	AFOS	CTRL	veh
EDEM2	B12	-1.4998	AFOS	CTRL	veh
EDF1	B12	-1.7123	AFOS	CTRL	veh
EDIL3	B12	-0.241268	AFOS	CTRL	veh
EDN2	B12	-0.597764	AFOS	CTRL	veh
EEA1	B12	1.59313	AFOS	CTRL	veh
EEF2K	B12	0.76821	AFOS	CTRL	veh
EFEMP1	B12	-0.676236	AFOS	CTRL	veh
EFHD2	B12	-0.615828	AFOS	CTRL	veh
EFNA1	B12	-1.23079	AFOS	CTRL	veh
EFNB1	B12	-0.855496	AFOS	CTRL	veh
EFNB2	B12	0.847592	AFOS	CTRL	veh
EFR3A	B12	0.286378	AFOS	CTRL	veh
EFTUD1	B12	1.0174	AFOS	CTRL	veh
EGF	B12	-0.901672	AFOS	CTRL	veh
EGFL6	B12	-0.691978	AFOS	CTRL	veh
EGFLAM	B12	0.571293	AFOS	CTRL	veh
EGFR	B12	-0.256213	AFOS	CTRL	veh
EGLN3	B12	-1.02889	AFOS	CTRL	veh
EHD1	B12	-0.460365	AFOS	CTRL	veh
EHD2	B12	-0.780268	AFOS	CTRL	veh
EHD4	B12	-0.465253	AFOS	CTRL	veh
EHF	B12	-0.940022	AFOS	CTRL	veh
EIF1	B12	-0.868072	AFOS	CTRL	veh
EIF1AD	B12	0.0179996	AFOS	CTRL	veh
EIF2AK2	B12	-0.502345	AFOS	CTRL	veh
EIF4A2	B12	-0.755986	AFOS	CTRL	veh
EIF4EBP3	B12	-0.738703	AFOS	CTRL	veh
EIF6	B12	-1.35946	AFOS	CTRL	veh
ELF1	B12	0.586933	AFOS	CTRL	veh
ELF3	B12	-0.73655	AFOS	CTRL	veh
ELF4	B12	-1.15266	AFOS	CTRL	veh
ELK3	B12	1.86668	AFOS	CTRL	veh
ELK4	B12	0.532393	AFOS	CTRL	veh
ELMO2	B12	0.520643	AFOS	CTRL	veh
ELN	B12	-0.525993	AFOS	CTRL	veh
EMILIN2	B12	-0.702732	AFOS	CTRL	veh
EML2	B12	-1.54099	AFOS	CTRL	veh
ENC1	B12	-0.921826	AFOS	CTRL	veh
ENKUR	B12	-0.441758	AFOS	CTRL	veh
ENO1	B12	-1.30463	AFOS	CTRL	veh
ENPP5	B12	-0.170351	AFOS	CTRL	veh
EPAS1	B12	-0.775635	AFOS	CTRL	veh
EPB41	B12	1.34494	AFOS	CTRL	veh
EPG5	B12	0.621969	AFOS	CTRL	veh
EPGN	B12	-0.353553	AFOS	CTRL	veh
EPHA2	B12	-0.838077	AFOS	CTRL	veh
EPHA4	B12	-1.39241	AFOS	CTRL	veh
EPHB1	B12	0.0745548	AFOS	CTRL	veh
EPHB2	B12	0.190815	AFOS	CTRL	veh
EPHX4	B12	0.0184964	AFOS	CTRL	veh
EPM2A	B12	0.0532754	AFOS	CTRL	veh
EPN1	B12	-0.455157	AFOS	CTRL	veh
EPPK1	B12	-0.816971	AFOS	CTRL	veh
EPS15	B12	1.12788	AFOS	CTRL	veh
EPS8	B12	0.787492	AFOS	CTRL	veh
EPS8L2	B12	-0.798135	AFOS	CTRL	veh
EPS8L3	B12	0.931447	AFOS	CTRL	veh
EPSTI1	B12	-0.514752	AFOS	CTRL	veh
ERAP1	B12	-0.50093	AFOS	CTRL	veh
ERAP2	B12	-0.800768	AFOS	CTRL	veh
ERCC6	B12	0.806614	AFOS	CTRL	veh
ERCC6-PGBD3	B12	0.0550069	AFOS	CTRL	veh
ERG	B12	-0.538437	AFOS	CTRL	veh
ERGIC1	B12	0.279029	AFOS	CTRL	veh
ERO1A	B12	0.844176	AFOS	CTRL	veh
ERRFI1	B12	-0.535788	AFOS	CTRL	veh
ESM1	B12	-0.621919	AFOS	CTRL	veh
ESPN	B12	-0.482218	AFOS	CTRL	veh
ESYT1	B12	0.701558	AFOS	CTRL	veh
ESYT2	B12	0.951065	AFOS	CTRL	veh
ESYT3	B12	-0.130243	AFOS	CTRL	veh
ETHE1	B12	-1.10207	AFOS	CTRL	veh
ETS1	B12	-0.390702	AFOS	CTRL	veh
ETS2	B12	-0.644556	AFOS	CTRL	veh
ETV6	B12	-0.0665395	AFOS	CTRL	veh
ETV7	B12	-0.487557	AFOS	CTRL	veh
EVA1A	B12	-0.435447	AFOS	CTRL	veh
EVA1C	B12	-0.571169	AFOS	CTRL	veh
EVC	B12	1.33323	AFOS	CTRL	veh
EVI5	B12	1.9426	AFOS	CTRL	veh
EXOC3L1	B12	0.63477	AFOS	CTRL	veh
EXOC3L4	B12	-0.478065	AFOS	CTRL	veh
EXT1	B12	-0.393046	AFOS	CTRL	veh
EYA4	B12	-1.41375	AFOS	CTRL	veh
EZR	B12	-0.136442	AFOS	CTRL	veh
F11R	B12	-0.918602	AFOS	CTRL	veh
F2R	B12	0.837975	AFOS	CTRL	veh
F2RL1	B12	-0.630024	AFOS	CTRL	veh
F2RL2	B12	-0.500233	AFOS	CTRL	veh
F3	B12	-0.806282	AFOS	CTRL	veh
F8A1	B12	-0.653326	AFOS	CTRL	veh
FA2H	B12	-0.784114	AFOS	CTRL	veh
FAAH2	B12	0.988626	AFOS	CTRL	veh
FABP6	B12	0.458372	AFOS	CTRL	veh
FADD	B12	-0.759688	AFOS	CTRL	veh
FADS3	B12	-0.757651	AFOS	CTRL	veh
FAM102A	B12	-0.696909	AFOS	CTRL	veh
FAM103A1	B12	-0.560463	AFOS	CTRL	veh
FAM107A	B12	-0.889336	AFOS	CTRL	veh
FAM107B	B12	-0.35078	AFOS	CTRL	veh
FAM109A	B12	-0.245108	AFOS	CTRL	veh
FAM110D	B12	-0.739125	AFOS	CTRL	veh
FAM120A	B12	0.264876	AFOS	CTRL	veh
FAM120B	B12	1.40734	AFOS	CTRL	veh
FAM127A	B12	-0.685836	AFOS	CTRL	veh
FAM129A	B12	-1.04465	AFOS	CTRL	veh
FAM129B	B12	-0.465265	AFOS	CTRL	veh
FAM134A	B12	-0.889662	AFOS	CTRL	veh
FAM135B	B12	1.76738	AFOS	CTRL	veh
FAM13B	B12	0.687554	AFOS	CTRL	veh
FAM13C	B12	-0.353553	AFOS	CTRL	veh
FAM153A	B12	-0.60132	AFOS	CTRL	veh
FAM153B	B12	-0.764965	AFOS	CTRL	veh
FAM153C	B12	1.75629	AFOS	CTRL	veh
FAM155B	B12	0.343699	AFOS	CTRL	veh
FAM160A1	B12	2.22003	AFOS	CTRL	veh
FAM160B1	B12	0.844016	AFOS	CTRL	veh
FAM167B	B12	-0.689716	AFOS	CTRL	veh
FAM179A	B12	-0.772318	AFOS	CTRL	veh
FAM180A	B12	-0.71251	AFOS	CTRL	veh
FAM188A	B12	0.132928	AFOS	CTRL	veh
FAM189A1	B12	-0.298618	AFOS	CTRL	veh
FAM193A	B12	0.842633	AFOS	CTRL	veh
FAM205C	B12	-0.353553	AFOS	CTRL	veh
FAM20A	B12	-0.657076	AFOS	CTRL	veh
FAM210A	B12	-0.289601	AFOS	CTRL	veh
FAM214B	B12	-0.080394	AFOS	CTRL	veh
FAM219A	B12	0.884247	AFOS	CTRL	veh
FAM21A	B12	0.038269	AFOS	CTRL	veh
FAM21C	B12	1.00567	AFOS	CTRL	veh
FAM229A	B12	-0.28693	AFOS	CTRL	veh
FAM234A	B12	-1.63228	AFOS	CTRL	veh
FAM24B	B12	-0.945433	AFOS	CTRL	veh
FAM25A	B12	-0.353553	AFOS	CTRL	veh
FAM25C	B12	-0.353553	AFOS	CTRL	veh
FAM25G	B12	NA	AFOS	CTRL	veh
FAM32A	B12	-0.898704	AFOS	CTRL	veh
FAM3C	B12	-1.29491	AFOS	CTRL	veh
FAM43A	B12	-0.850984	AFOS	CTRL	veh
FAM46A	B12	0.188992	AFOS	CTRL	veh
FAM46B	B12	1.02852	AFOS	CTRL	veh
FAM47E-STBD1	B12	0.424	AFOS	CTRL	veh
FAM49A	B12	-0.408378	AFOS	CTRL	veh
FAM50A	B12	-1.11336	AFOS	CTRL	veh
FAM65A	B12	1.02423	AFOS	CTRL	veh
FAM65B	B12	-0.839923	AFOS	CTRL	veh
FAM69A	B12	-1.34269	AFOS	CTRL	veh
FAM71A	B12	-0.353553	AFOS	CTRL	veh
FAM71E1	B12	-1.70332	AFOS	CTRL	veh
FAM71F1	B12	-0.127935	AFOS	CTRL	veh
FAM78B	B12	-1.03064	AFOS	CTRL	veh
FAM83E	B12	0.0302489	AFOS	CTRL	veh
FAM83G	B12	-0.867338	AFOS	CTRL	veh
FAM83H	B12	-0.564957	AFOS	CTRL	veh
FAM84A	B12	-0.0738616	AFOS	CTRL	veh
FAM84B	B12	-0.77211	AFOS	CTRL	veh
FAM91A1	B12	0.881283	AFOS	CTRL	veh
FANK1	B12	0.687179	AFOS	CTRL	veh
FAP	B12	-0.293726	AFOS	CTRL	veh
FAS	B12	-1.14387	AFOS	CTRL	veh
FASN	B12	1.5692	AFOS	CTRL	veh
FAT2	B12	-0.748238	AFOS	CTRL	veh
FAT3	B12	0.510588	AFOS	CTRL	veh
FATE1	B12	NA	AFOS	CTRL	veh
FBLN2	B12	-0.914428	AFOS	CTRL	veh
FBN1	B12	-0.590182	AFOS	CTRL	veh
FBP1	B12	-0.789494	AFOS	CTRL	veh
FBRS	B12	0.829557	AFOS	CTRL	veh
FBXL2	B12	-0.351524	AFOS	CTRL	veh
FBXO18	B12	-0.980656	AFOS	CTRL	veh
FBXO2	B12	-0.988177	AFOS	CTRL	veh
FBXO25	B12	-0.235094	AFOS	CTRL	veh
FBXO3	B12	1.0775	AFOS	CTRL	veh
FBXO32	B12	-0.492808	AFOS	CTRL	veh
FBXO39	B12	-0.540431	AFOS	CTRL	veh
FBXO42	B12	0.488527	AFOS	CTRL	veh
FBXO7	B12	-0.435412	AFOS	CTRL	veh
FBXO8	B12	0.283746	AFOS	CTRL	veh
FBXW10	B12	-0.685481	AFOS	CTRL	veh
FBXW4	B12	-0.839937	AFOS	CTRL	veh
FBXW7	B12	-0.572859	AFOS	CTRL	veh
FCGR2A	B12	-0.661122	AFOS	CTRL	veh
FCMR	B12	-0.537244	AFOS	CTRL	veh
FCRLA	B12	-0.872603	AFOS	CTRL	veh
FDPS	B12	-1.16369	AFOS	CTRL	veh
FEM1C	B12	-0.115063	AFOS	CTRL	veh
FER1L6	B12	-0.490221	AFOS	CTRL	veh
FETUB	B12	-0.353553	AFOS	CTRL	veh
FEZ2	B12	0.158108	AFOS	CTRL	veh
FFAR1	B12	-0.520006	AFOS	CTRL	veh
FGD6	B12	0.966825	AFOS	CTRL	veh
FGF1	B12	-0.88554	AFOS	CTRL	veh
FGF21	B12	-0.474094	AFOS	CTRL	veh
FGFBP1	B12	-0.570014	AFOS	CTRL	veh
FGFR1	B12	-0.980571	AFOS	CTRL	veh
FGGY	B12	0.85009	AFOS	CTRL	veh
FGR	B12	-0.951358	AFOS	CTRL	veh
FHL1	B12	-0.467651	AFOS	CTRL	veh
FHL2	B12	-0.540109	AFOS	CTRL	veh
FHL3	B12	-0.984457	AFOS	CTRL	veh
FHOD3	B12	0.902668	AFOS	CTRL	veh
FICD	B12	-1.23073	AFOS	CTRL	veh
FILIP1L	B12	-0.562387	AFOS	CTRL	veh
FIP1L1	B12	-0.300076	AFOS	CTRL	veh
FKBP15	B12	-0.609533	AFOS	CTRL	veh
FKBP1A	B12	-0.218111	AFOS	CTRL	veh
FKBP1C	B12	1.07462	AFOS	CTRL	veh
FLG	B12	1.32078	AFOS	CTRL	veh
FLI1	B12	-0.533387	AFOS	CTRL	veh
FLNA	B12	1.15599	AFOS	CTRL	veh
FLNB	B12	-0.143963	AFOS	CTRL	veh
FLNC	B12	-0.512718	AFOS	CTRL	veh
FLT3LG	B12	-0.175759	AFOS	CTRL	veh
FLYWCH1	B12	-0.533037	AFOS	CTRL	veh
FMO2	B12	-0.630281	AFOS	CTRL	veh
FMOD	B12	-0.529114	AFOS	CTRL	veh
FMR1	B12	-0.201412	AFOS	CTRL	veh
FN1	B12	-0.500671	AFOS	CTRL	veh
FNDC1	B12	0.423511	AFOS	CTRL	veh
FNDC3A	B12	1.10901	AFOS	CTRL	veh
FNIP1	B12	1.18808	AFOS	CTRL	veh
FNTB	B12	-0.719371	AFOS	CTRL	veh
FOLR1	B12	-0.967903	AFOS	CTRL	veh
FOLR3	B12	-0.534555	AFOS	CTRL	veh
FOS	B12	-1.50588	AFOS	CTRL	veh
FOSL1	B12	-0.0992155	AFOS	CTRL	veh
FOSL2	B12	-0.18604	AFOS	CTRL	veh
FOXC1	B12	0.286994	AFOS	CTRL	veh
FOXC2	B12	-0.597738	AFOS	CTRL	veh
FOXD1	B12	-1.49987	AFOS	CTRL	veh
FOXD4L6	B12	-1.42028	AFOS	CTRL	veh
FOXE1	B12	-0.401572	AFOS	CTRL	veh
FOXE3	B12	-0.959773	AFOS	CTRL	veh
FOXF1	B12	-0.432124	AFOS	CTRL	veh
FOXI1	B12	-0.353553	AFOS	CTRL	veh
FOXL1	B12	-0.520006	AFOS	CTRL	veh
FOXO1	B12	-0.682293	AFOS	CTRL	veh
FOXO3	B12	1.41479	AFOS	CTRL	veh
FOXO4	B12	-0.0591639	AFOS	CTRL	veh
FOXP1	B12	-0.832455	AFOS	CTRL	veh
FOXS1	B12	-0.921329	AFOS	CTRL	veh
FP325317.1	B12	NA	AFOS	CTRL	veh
FPGS	B12	-0.850855	AFOS	CTRL	veh
FPR1	B12	-0.54922	AFOS	CTRL	veh
FRAS1	B12	-0.581426	AFOS	CTRL	veh
FREM1	B12	-0.353553	AFOS	CTRL	veh
FRMD3	B12	0.616222	AFOS	CTRL	veh
FRMD4B	B12	-0.973868	AFOS	CTRL	veh
FRMD5	B12	-0.336337	AFOS	CTRL	veh
FRMD6	B12	-0.00101557	AFOS	CTRL	veh
FRMD8	B12	-0.422063	AFOS	CTRL	veh
FRMPD4	B12	0.528222	AFOS	CTRL	veh
FSCN1	B12	0.18151	AFOS	CTRL	veh
FST	B12	-0.674008	AFOS	CTRL	veh
FSTL1	B12	-0.804538	AFOS	CTRL	veh
FSTL3	B12	-0.509461	AFOS	CTRL	veh
FTH1	B12	-0.885763	AFOS	CTRL	veh
FTL	B12	-0.639941	AFOS	CTRL	veh
FTSJ1	B12	-0.676986	AFOS	CTRL	veh
FUCA1	B12	-0.155061	AFOS	CTRL	veh
FUCA2	B12	-1.12952	AFOS	CTRL	veh
FUNDC2	B12	-1.31711	AFOS	CTRL	veh
FURIN	B12	0.719296	AFOS	CTRL	veh
FUT1	B12	-0.700201	AFOS	CTRL	veh
FUT3	B12	0.126322	AFOS	CTRL	veh
FXYD3	B12	-0.68096	AFOS	CTRL	veh
FXYD4	B12	-0.537681	AFOS	CTRL	veh
FYCO1	B12	0.593457	AFOS	CTRL	veh
FYN	B12	-0.236832	AFOS	CTRL	veh
FZD5	B12	0.558862	AFOS	CTRL	veh
G0S2	B12	-0.707866	AFOS	CTRL	veh
G6PD	B12	-0.777527	AFOS	CTRL	veh
GAB3	B12	-0.0820153	AFOS	CTRL	veh
GABARAP	B12	-0.484977	AFOS	CTRL	veh
GABARAPL1	B12	0.0213637	AFOS	CTRL	veh
GABRE	B12	-0.562877	AFOS	CTRL	veh
GABRP	B12	-0.772554	AFOS	CTRL	veh
GAD1	B12	-0.525013	AFOS	CTRL	veh
GADD45A	B12	-0.631293	AFOS	CTRL	veh
GADD45B	B12	-0.945392	AFOS	CTRL	veh
GAL	B12	1.01366	AFOS	CTRL	veh
GALNT1	B12	0.370903	AFOS	CTRL	veh
GALNT10	B12	-0.528871	AFOS	CTRL	veh
GALNT12	B12	0.0994557	AFOS	CTRL	veh
GALNT15	B12	-0.689583	AFOS	CTRL	veh
GALNT18	B12	-0.52123	AFOS	CTRL	veh
GALNT2	B12	-0.148547	AFOS	CTRL	veh
GALNT5	B12	-1.00494	AFOS	CTRL	veh
GALNT7	B12	-0.372355	AFOS	CTRL	veh
GALNT8	B12	0.911008	AFOS	CTRL	veh
GALNT9	B12	-0.84806	AFOS	CTRL	veh
GAS6	B12	-1.09624	AFOS	CTRL	veh
GAST	B12	-0.534432	AFOS	CTRL	veh
GATA3	B12	-0.101979	AFOS	CTRL	veh
GATA6	B12	-0.826215	AFOS	CTRL	veh
GATAD2A	B12	0.886249	AFOS	CTRL	veh
GATAD2B	B12	0.909047	AFOS	CTRL	veh
GATS	B12	-0.477039	AFOS	CTRL	veh
GBE1	B12	-0.275028	AFOS	CTRL	veh
GBP1	B12	-0.784395	AFOS	CTRL	veh
GBP2	B12	-0.315603	AFOS	CTRL	veh
GBP3	B12	-0.563222	AFOS	CTRL	veh
GBP4	B12	-0.736483	AFOS	CTRL	veh
GBP5	B12	-0.58458	AFOS	CTRL	veh
GCC1	B12	0.317437	AFOS	CTRL	veh
GCC2	B12	0.464792	AFOS	CTRL	veh
GCK	B12	2.47487	AFOS	CTRL	veh
GCLC	B12	0.184097	AFOS	CTRL	veh
GCLM	B12	0.678682	AFOS	CTRL	veh
GCNT1	B12	0.746639	AFOS	CTRL	veh
GCNT2	B12	-0.38645	AFOS	CTRL	veh
GCNT3	B12	-0.766712	AFOS	CTRL	veh
GCNT4	B12	-0.700765	AFOS	CTRL	veh
GDA	B12	2.24564	AFOS	CTRL	veh
GDF15	B12	-0.954252	AFOS	CTRL	veh
GDNF	B12	-0.177618	AFOS	CTRL	veh
GDPD5	B12	-0.187882	AFOS	CTRL	veh
GEM	B12	-0.658092	AFOS	CTRL	veh
GFOD1	B12	-1.00112	AFOS	CTRL	veh
GFPT2	B12	0.10962	AFOS	CTRL	veh
GFRA1	B12	0.128606	AFOS	CTRL	veh
GFRA3	B12	-0.951857	AFOS	CTRL	veh
GGT1	B12	-0.995474	AFOS	CTRL	veh
GGT2	B12	-0.353553	AFOS	CTRL	veh
GGT5	B12	-0.770277	AFOS	CTRL	veh
GGTLC2	B12	-0.435514	AFOS	CTRL	veh
GGTLC3	B12	-0.384167	AFOS	CTRL	veh
GHR	B12	0.0698276	AFOS	CTRL	veh
GIMAP2	B12	-0.76895	AFOS	CTRL	veh
GIMAP5	B12	-0.489838	AFOS	CTRL	veh
GIMAP6	B12	-0.530551	AFOS	CTRL	veh
GINM1	B12	-1.91577	AFOS	CTRL	veh
GINS3	B12	-1.35283	AFOS	CTRL	veh
GIPC2	B12	-0.312659	AFOS	CTRL	veh
GJA4	B12	-0.5596	AFOS	CTRL	veh
GJA5	B12	-0.889366	AFOS	CTRL	veh
GJB1	B12	-0.64087	AFOS	CTRL	veh
GJB3	B12	-0.624662	AFOS	CTRL	veh
GJB4	B12	-0.572739	AFOS	CTRL	veh
GJB5	B12	-0.674398	AFOS	CTRL	veh
GJB7	B12	-0.353553	AFOS	CTRL	veh
GJC2	B12	-1.14559	AFOS	CTRL	veh
GKN1	B12	NA	AFOS	CTRL	veh
GLB1	B12	0.279894	AFOS	CTRL	veh
GLCE	B12	0.888331	AFOS	CTRL	veh
GLDN	B12	-0.447951	AFOS	CTRL	veh
GLG1	B12	1.288	AFOS	CTRL	veh
GLI2	B12	1.00754	AFOS	CTRL	veh
GLIPR1	B12	-0.811235	AFOS	CTRL	veh
GLIS2	B12	0.245559	AFOS	CTRL	veh
GLMP	B12	-0.242822	AFOS	CTRL	veh
GLP2R	B12	-0.403523	AFOS	CTRL	veh
GLRA4	B12	NA	AFOS	CTRL	veh
GLRX	B12	-0.878662	AFOS	CTRL	veh
GLS	B12	1.92909	AFOS	CTRL	veh
GM2A	B12	0.774343	AFOS	CTRL	veh
GMDS	B12	-0.921792	AFOS	CTRL	veh
GMEB2	B12	-0.246845	AFOS	CTRL	veh
GMPR	B12	-0.842084	AFOS	CTRL	veh
GNA11	B12	-0.322682	AFOS	CTRL	veh
GNAI2	B12	-1.29262	AFOS	CTRL	veh
GNAS	B12	-0.550818	AFOS	CTRL	veh
GNG12	B12	-0.215514	AFOS	CTRL	veh
GNG5	B12	-1.2576	AFOS	CTRL	veh
GNGT2	B12	-0.724722	AFOS	CTRL	veh
GNPDA1	B12	0.688394	AFOS	CTRL	veh
GNPTAB	B12	1.58035	AFOS	CTRL	veh
GNPTG	B12	-1.75012	AFOS	CTRL	veh
GNS	B12	0.861687	AFOS	CTRL	veh
GOLGA7	B12	-0.603448	AFOS	CTRL	veh
GOLGA7B	B12	0.476575	AFOS	CTRL	veh
GOLGB1	B12	1.68752	AFOS	CTRL	veh
GON4L	B12	1.01265	AFOS	CTRL	veh
GORAB	B12	-0.223069	AFOS	CTRL	veh
GPA33	B12	-0.237223	AFOS	CTRL	veh
GPAT3	B12	0.306367	AFOS	CTRL	veh
GPATCH3	B12	-0.462376	AFOS	CTRL	veh
GPBP1	B12	-0.152455	AFOS	CTRL	veh
GPC1	B12	-0.563031	AFOS	CTRL	veh
GPCPD1	B12	-0.711591	AFOS	CTRL	veh
GPNMB	B12	-0.735069	AFOS	CTRL	veh
GPR1	B12	-0.341435	AFOS	CTRL	veh
GPR108	B12	-1.07177	AFOS	CTRL	veh
GPR135	B12	-0.195997	AFOS	CTRL	veh
GPR137B	B12	-1.0858	AFOS	CTRL	veh
GPR143	B12	-1.46632	AFOS	CTRL	veh
GPR158	B12	-0.91951	AFOS	CTRL	veh
GPR160	B12	1.76367	AFOS	CTRL	veh
GPR17	B12	-0.53647	AFOS	CTRL	veh
GPR35	B12	0.0614699	AFOS	CTRL	veh
GPR37L1	B12	-0.76679	AFOS	CTRL	veh
GPR39	B12	-0.353553	AFOS	CTRL	veh
GPR4	B12	-0.465057	AFOS	CTRL	veh
GPR78	B12	-0.353808	AFOS	CTRL	veh
GPR87	B12	-0.52662	AFOS	CTRL	veh
GPRC5A	B12	-0.548417	AFOS	CTRL	veh
GPRC5B	B12	-0.306932	AFOS	CTRL	veh
GPSM3	B12	0.542266	AFOS	CTRL	veh
GPT2	B12	-0.907436	AFOS	CTRL	veh
GPX2	B12	-0.794425	AFOS	CTRL	veh
GPX3	B12	-0.0289098	AFOS	CTRL	veh
GRAMD1B	B12	0.128656	AFOS	CTRL	veh
GRAMD3	B12	NA	AFOS	CTRL	veh
GRASP	B12	-0.81011	AFOS	CTRL	veh
GRB10	B12	0.238242	AFOS	CTRL	veh
GRB7	B12	-0.857752	AFOS	CTRL	veh
GREB1L	B12	1.19117	AFOS	CTRL	veh
GREM2	B12	0.132323	AFOS	CTRL	veh
GRID1	B12	0.359441	AFOS	CTRL	veh
GRINA	B12	-1.08146	AFOS	CTRL	veh
GRK4	B12	0.0908907	AFOS	CTRL	veh
GRN	B12	-1.05573	AFOS	CTRL	veh
GRPR	B12	-0.0695247	AFOS	CTRL	veh
GSAP	B12	-0.353553	AFOS	CTRL	veh
GSDMA	B12	-0.578199	AFOS	CTRL	veh
GSDMB	B12	-0.251681	AFOS	CTRL	veh
GSDMC	B12	-0.673293	AFOS	CTRL	veh
GSKIP	B12	-0.673795	AFOS	CTRL	veh
GSN	B12	-0.673856	AFOS	CTRL	veh
GSTA1	B12	-0.480102	AFOS	CTRL	veh
GSTA2	B12	-0.604532	AFOS	CTRL	veh
GSTA5	B12	NA	AFOS	CTRL	veh
GSTM1	B12	-0.492033	AFOS	CTRL	veh
GSTM2	B12	-0.986626	AFOS	CTRL	veh
GSTM4	B12	-1.09397	AFOS	CTRL	veh
GTF2B	B12	-1.37081	AFOS	CTRL	veh
GTF2F2	B12	-1.10789	AFOS	CTRL	veh
GTF2IRD1	B12	-0.0379185	AFOS	CTRL	veh
GTF2IRD2	B12	-1.11586	AFOS	CTRL	veh
GTF2IRD2B	B12	-0.998606	AFOS	CTRL	veh
GTPBP1	B12	-0.106993	AFOS	CTRL	veh
GTPBP2	B12	-0.55582	AFOS	CTRL	veh
GUCA1B	B12	-0.539781	AFOS	CTRL	veh
GUCA2A	B12	NA	AFOS	CTRL	veh
GUCA2B	B12	NA	AFOS	CTRL	veh
GUCD1	B12	0.419186	AFOS	CTRL	veh
GUCY1A2	B12	-0.98119	AFOS	CTRL	veh
GUK1	B12	-0.897356	AFOS	CTRL	veh
GUSB	B12	-1.42382	AFOS	CTRL	veh
GYG1	B12	-0.0702565	AFOS	CTRL	veh
H1F0	B12	-0.872166	AFOS	CTRL	veh
H3F3B	B12	-0.791461	AFOS	CTRL	veh
HAS2	B12	-1.12777	AFOS	CTRL	veh
HAS3	B12	0.403711	AFOS	CTRL	veh
HAVCR2	B12	0.0589336	AFOS	CTRL	veh
HBE1	B12	0.419937	AFOS	CTRL	veh
HBEGF	B12	-0.778034	AFOS	CTRL	veh
HCAR2	B12	-0.353553	AFOS	CTRL	veh
HCLS1	B12	-1.18	AFOS	CTRL	veh
HCN2	B12	0.0841607	AFOS	CTRL	veh
HCST	B12	-0.812086	AFOS	CTRL	veh
HDAC11	B12	0.0506497	AFOS	CTRL	veh
HDAC7	B12	-0.330277	AFOS	CTRL	veh
HEATR5A	B12	0.438118	AFOS	CTRL	veh
HEBP2	B12	-0.233912	AFOS	CTRL	veh
HECTD1	B12	0.919137	AFOS	CTRL	veh
HECTD3	B12	0.19959	AFOS	CTRL	veh
HECTD4	B12	1.90606	AFOS	CTRL	veh
HEG1	B12	-0.684832	AFOS	CTRL	veh
HELZ2	B12	-0.55975	AFOS	CTRL	veh
HEPACAM	B12	-0.573745	AFOS	CTRL	veh
HEPH	B12	-1.11672	AFOS	CTRL	veh
HEPHL1	B12	-0.597231	AFOS	CTRL	veh
HEPN1	B12	-0.6161	AFOS	CTRL	veh
HERC3	B12	-0.923937	AFOS	CTRL	veh
HERC4	B12	1.79514	AFOS	CTRL	veh
HERC5	B12	-0.718483	AFOS	CTRL	veh
HERC6	B12	-0.801529	AFOS	CTRL	veh
HERPUD2	B12	1.27191	AFOS	CTRL	veh
HEXDC	B12	-0.948797	AFOS	CTRL	veh
HGD	B12	-0.672301	AFOS	CTRL	veh
HGS	B12	0.278715	AFOS	CTRL	veh
HHAT	B12	0.484288	AFOS	CTRL	veh
HHATL	B12	-0.714603	AFOS	CTRL	veh
HHEX	B12	-0.435533	AFOS	CTRL	veh
HHIP	B12	0.668317	AFOS	CTRL	veh
HHLA1	B12	-0.353553	AFOS	CTRL	veh
HIBADH	B12	-0.496696	AFOS	CTRL	veh
HIF1A	B12	-0.163771	AFOS	CTRL	veh
HIGD1A	B12	-1.09497	AFOS	CTRL	veh
HINT1	B12	-0.85219	AFOS	CTRL	veh
HIPK2	B12	1.29706	AFOS	CTRL	veh
HIST1H1T	B12	0.606448	AFOS	CTRL	veh
HIST1H2AC	B12	-0.822479	AFOS	CTRL	veh
HIST1H2BC	B12	0.165433	AFOS	CTRL	veh
HIST1H2BD	B12	-0.795586	AFOS	CTRL	veh
HIST1H2BK	B12	-0.910544	AFOS	CTRL	veh
HIST1H3E	B12	-0.0425521	AFOS	CTRL	veh
HIST1H4E	B12	-0.179494	AFOS	CTRL	veh
HIST1H4H	B12	-0.491208	AFOS	CTRL	veh
HIST1H4J	B12	-1.62952	AFOS	CTRL	veh
HIST2H2AA3	B12	-1.41276	AFOS	CTRL	veh
HIST2H2AA4	B12	-1.5419	AFOS	CTRL	veh
HIST2H2BE	B12	-0.877276	AFOS	CTRL	veh
HIST2H2BF	B12	-0.393749	AFOS	CTRL	veh
HIST2H3A	B12	1.24888	AFOS	CTRL	veh
HIST2H3C	B12	-1.30322	AFOS	CTRL	veh
HIST2H4A	B12	-1.56952	AFOS	CTRL	veh
HIST3H2A	B12	-0.646104	AFOS	CTRL	veh
HIST3H2BB	B12	-0.818212	AFOS	CTRL	veh
HIVEP1	B12	0.982386	AFOS	CTRL	veh
HIVEP2	B12	-0.240502	AFOS	CTRL	veh
HIVEP3	B12	1.52992	AFOS	CTRL	veh
HKDC1	B12	-0.541838	AFOS	CTRL	veh
HLA-A	B12	-1.20304	AFOS	CTRL	veh
HLA-B	B12	-0.862002	AFOS	CTRL	veh
HLA-C	B12	-1.07894	AFOS	CTRL	veh
HLA-DOB	B12	-0.750073	AFOS	CTRL	veh
HLA-DPB1	B12	-0.815288	AFOS	CTRL	veh
HLA-E	B12	-0.455265	AFOS	CTRL	veh
HLA-F	B12	-1.14117	AFOS	CTRL	veh
HLX	B12	-0.801559	AFOS	CTRL	veh
HMCN2	B12	1.17861	AFOS	CTRL	veh
HMGA1	B12	0.127741	AFOS	CTRL	veh
HMGCL	B12	-0.928221	AFOS	CTRL	veh
HMGCR	B12	0.656129	AFOS	CTRL	veh
HMGCS1	B12	1.06683	AFOS	CTRL	veh
HMHA1	B12	-0.712176	AFOS	CTRL	veh
HMOX1	B12	-0.494231	AFOS	CTRL	veh
HMOX2	B12	-1.32027	AFOS	CTRL	veh
HOGA1	B12	-0.822859	AFOS	CTRL	veh
HOOK2	B12	-0.869855	AFOS	CTRL	veh
HOXB9	B12	-0.531472	AFOS	CTRL	veh
HPCAL1	B12	-0.193235	AFOS	CTRL	veh
HPD	B12	-0.523688	AFOS	CTRL	veh
HPS5	B12	0.138759	AFOS	CTRL	veh
HR	B12	-1.42769	AFOS	CTRL	veh
HRASLS2	B12	-0.734528	AFOS	CTRL	veh
HRC	B12	-0.248654	AFOS	CTRL	veh
HRCT1	B12	-1.10746	AFOS	CTRL	veh
HRG	B12	-0.353553	AFOS	CTRL	veh
HRH1	B12	-0.789113	AFOS	CTRL	veh
HRK	B12	-0.1966	AFOS	CTRL	veh
HRNR	B12	0.796815	AFOS	CTRL	veh
HS3ST1	B12	0.739093	AFOS	CTRL	veh
HS3ST2	B12	-0.207324	AFOS	CTRL	veh
HS3ST3A1	B12	0.0665121	AFOS	CTRL	veh
HS3ST3B1	B12	-0.888621	AFOS	CTRL	veh
HS3ST5	B12	-0.353553	AFOS	CTRL	veh
HS6ST1	B12	-0.735582	AFOS	CTRL	veh
HSBP1	B12	-0.295864	AFOS	CTRL	veh
HSD11B1	B12	-0.678813	AFOS	CTRL	veh
HSD17B2	B12	-0.496622	AFOS	CTRL	veh
HSD3B1	B12	-0.353553	AFOS	CTRL	veh
HSF1	B12	-1.10496	AFOS	CTRL	veh
HSF2BP	B12	0.226912	AFOS	CTRL	veh
HSH2D	B12	-0.738106	AFOS	CTRL	veh
HSPA2	B12	-0.98529	AFOS	CTRL	veh
HSPA6	B12	-0.834991	AFOS	CTRL	veh
HSPB1	B12	-1.36704	AFOS	CTRL	veh
HSPB2	B12	-1.10279	AFOS	CTRL	veh
HSPB3	B12	-0.80264	AFOS	CTRL	veh
HSPB8	B12	-0.561982	AFOS	CTRL	veh
HSPG2	B12	-0.541877	AFOS	CTRL	veh
HTN3	B12	NA	AFOS	CTRL	veh
HTR1D	B12	-0.626867	AFOS	CTRL	veh
HTR3A	B12	-0.522684	AFOS	CTRL	veh
HTR3E	B12	-0.353553	AFOS	CTRL	veh
HTRA1	B12	-1.73473	AFOS	CTRL	veh
HTRA3	B12	-0.660115	AFOS	CTRL	veh
HUWE1	B12	2.11482	AFOS	CTRL	veh
HYI	B12	-0.186202	AFOS	CTRL	veh
HYPM	B12	NA	AFOS	CTRL	veh
ICAM1	B12	-1.19231	AFOS	CTRL	veh
ICAM4	B12	-0.513702	AFOS	CTRL	veh
ICK	B12	1.69905	AFOS	CTRL	veh
IDO1	B12	-0.488219	AFOS	CTRL	veh
IDS	B12	0.578113	AFOS	CTRL	veh
IER3	B12	-1.26089	AFOS	CTRL	veh
IER5	B12	-1.17152	AFOS	CTRL	veh
IFFO2	B12	0.0553216	AFOS	CTRL	veh
IFI16	B12	-0.564364	AFOS	CTRL	veh
IFI27	B12	-0.63874	AFOS	CTRL	veh
IFI30	B12	-1.1717	AFOS	CTRL	veh
IFI35	B12	-0.938928	AFOS	CTRL	veh
IFI44	B12	-0.701951	AFOS	CTRL	veh
IFI44L	B12	-0.652138	AFOS	CTRL	veh
IFI6	B12	-0.789663	AFOS	CTRL	veh
IFIH1	B12	-0.651663	AFOS	CTRL	veh
IFIT1	B12	-0.780036	AFOS	CTRL	veh
IFIT2	B12	-0.703147	AFOS	CTRL	veh
IFIT3	B12	-0.712882	AFOS	CTRL	veh
IFIT5	B12	-0.785083	AFOS	CTRL	veh
IFITM1	B12	-0.693732	AFOS	CTRL	veh
IFITM10	B12	-0.0387405	AFOS	CTRL	veh
IFITM2	B12	-0.899339	AFOS	CTRL	veh
IFITM3	B12	-0.726477	AFOS	CTRL	veh
IFNB1	B12	-0.823175	AFOS	CTRL	veh
IFNGR1	B12	-0.566456	AFOS	CTRL	veh
IFNL1	B12	-0.787075	AFOS	CTRL	veh
IFNL2	B12	-0.485919	AFOS	CTRL	veh
IFNL3	B12	-0.798402	AFOS	CTRL	veh
IFRD1	B12	-0.560029	AFOS	CTRL	veh
IFT46	B12	-1.62053	AFOS	CTRL	veh
IGDCC4	B12	0.557291	AFOS	CTRL	veh
IGF1	B12	-0.67175	AFOS	CTRL	veh
IGF1R	B12	-0.126558	AFOS	CTRL	veh
IGFBP1	B12	-0.353553	AFOS	CTRL	veh
IGFBP2	B12	-1.39784	AFOS	CTRL	veh
IGFBP3	B12	-0.638102	AFOS	CTRL	veh
IGFBP4	B12	-0.965598	AFOS	CTRL	veh
IGFBP5	B12	-0.469617	AFOS	CTRL	veh
IGFBP6	B12	-0.566887	AFOS	CTRL	veh
IGFBP7	B12	-1.11319	AFOS	CTRL	veh
IGFL1	B12	-0.455387	AFOS	CTRL	veh
IGFL2	B12	-0.372694	AFOS	CTRL	veh
IGFL3	B12	NA	AFOS	CTRL	veh
IGFL4	B12	-1.11615	AFOS	CTRL	veh
IGFN1	B12	-0.644266	AFOS	CTRL	veh
IGHMBP2	B12	-0.259716	AFOS	CTRL	veh
IGIP	B12	-0.266198	AFOS	CTRL	veh
IGSF23	B12	-0.456341	AFOS	CTRL	veh
IGSF3	B12	1.5899	AFOS	CTRL	veh
IGSF8	B12	-0.263243	AFOS	CTRL	veh
IKBKB	B12	0.367876	AFOS	CTRL	veh
IKBKG	B12	-1.02874	AFOS	CTRL	veh
IKZF3	B12	-0.296726	AFOS	CTRL	veh
IL10RB	B12	-2.37481	AFOS	CTRL	veh
IL11	B12	-1.026	AFOS	CTRL	veh
IL12A	B12	-1.13547	AFOS	CTRL	veh
IL13RA1	B12	-0.314644	AFOS	CTRL	veh
IL15	B12	-0.561565	AFOS	CTRL	veh
IL15RA	B12	-1.38508	AFOS	CTRL	veh
IL16	B12	0.445441	AFOS	CTRL	veh
IL17RE	B12	-0.67472	AFOS	CTRL	veh
IL18	B12	-0.158366	AFOS	CTRL	veh
IL18BP	B12	-0.0951389	AFOS	CTRL	veh
IL19	B12	NA	AFOS	CTRL	veh
IL1A	B12	-1.12395	AFOS	CTRL	veh
IL1B	B12	-0.87698	AFOS	CTRL	veh
IL1R2	B12	-0.353553	AFOS	CTRL	veh
IL1RAP	B12	0.274246	AFOS	CTRL	veh
IL1RAPL1	B12	-0.587685	AFOS	CTRL	veh
IL1RAPL2	B12	2.20858	AFOS	CTRL	veh
IL1RL1	B12	-0.353553	AFOS	CTRL	veh
IL1RN	B12	-0.582289	AFOS	CTRL	veh
IL20	B12	NA	AFOS	CTRL	veh
IL20RB	B12	-0.970319	AFOS	CTRL	veh
IL22RA1	B12	-0.620794	AFOS	CTRL	veh
IL23A	B12	-1.3016	AFOS	CTRL	veh
IL24	B12	-0.492033	AFOS	CTRL	veh
IL27	B12	NA	AFOS	CTRL	veh
IL2RG	B12	-0.51626	AFOS	CTRL	veh
IL31RA	B12	-0.720787	AFOS	CTRL	veh
IL32	B12	-0.614026	AFOS	CTRL	veh
IL33	B12	-0.835345	AFOS	CTRL	veh
IL34	B12	-0.903211	AFOS	CTRL	veh
IL36RN	B12	-0.353553	AFOS	CTRL	veh
IL4I1	B12	-0.690249	AFOS	CTRL	veh
IL4R	B12	0.304981	AFOS	CTRL	veh
IL6	B12	-0.563351	AFOS	CTRL	veh
IL6R	B12	-0.344123	AFOS	CTRL	veh
IL6ST	B12	0.714239	AFOS	CTRL	veh
IL7	B12	-0.647319	AFOS	CTRL	veh
IL7R	B12	-0.461661	AFOS	CTRL	veh
ILDR1	B12	NA	AFOS	CTRL	veh
ILDR2	B12	-0.663291	AFOS	CTRL	veh
ILK	B12	-0.615183	AFOS	CTRL	veh
INF2	B12	-0.198597	AFOS	CTRL	veh
INHBA	B12	-0.845945	AFOS	CTRL	veh
INHBB	B12	-0.532562	AFOS	CTRL	veh
INMT	B12	-0.591442	AFOS	CTRL	veh
INO80C	B12	-1.3568	AFOS	CTRL	veh
INPP4B	B12	-0.574947	AFOS	CTRL	veh
INPP5A	B12	0.430016	AFOS	CTRL	veh
INPP5D	B12	-0.717426	AFOS	CTRL	veh
INPP5F	B12	0.921573	AFOS	CTRL	veh
INPP5K	B12	-0.903302	AFOS	CTRL	veh
INPPL1	B12	0.413947	AFOS	CTRL	veh
INSC	B12	-1.04986	AFOS	CTRL	veh
INSIG1	B12	0.113531	AFOS	CTRL	veh
INSIG2	B12	-0.374304	AFOS	CTRL	veh
IP6K1	B12	0.25207	AFOS	CTRL	veh
IP6K3	B12	-0.884707	AFOS	CTRL	veh
IPPK	B12	-0.420392	AFOS	CTRL	veh
IQCK	B12	-1.33031	AFOS	CTRL	veh
IQGAP1	B12	1.03395	AFOS	CTRL	veh
IQGAP2	B12	0.676606	AFOS	CTRL	veh
IRAK1	B12	0.383866	AFOS	CTRL	veh
IRAK2	B12	-0.626538	AFOS	CTRL	veh
IRAK4	B12	1.75886	AFOS	CTRL	veh
IRF2	B12	-0.718605	AFOS	CTRL	veh
IRF2BP2	B12	-0.590671	AFOS	CTRL	veh
IRF6	B12	-0.622098	AFOS	CTRL	veh
IRF9	B12	-1.06813	AFOS	CTRL	veh
IRGQ	B12	1.65321	AFOS	CTRL	veh
IRS2	B12	0.366086	AFOS	CTRL	veh
ISG15	B12	-0.952724	AFOS	CTRL	veh
ISG20	B12	-0.598921	AFOS	CTRL	veh
ISLR	B12	-0.640504	AFOS	CTRL	veh
ISY1-RAB43	B12	-0.263347	AFOS	CTRL	veh
ITFG1	B12	-0.0475109	AFOS	CTRL	veh
ITGA1	B12	-0.941428	AFOS	CTRL	veh
ITGA10	B12	-0.819279	AFOS	CTRL	veh
ITGA11	B12	-0.952203	AFOS	CTRL	veh
ITGA2	B12	0.850355	AFOS	CTRL	veh
ITGA3	B12	-0.645851	AFOS	CTRL	veh
ITGA5	B12	-0.310242	AFOS	CTRL	veh
ITGA6	B12	1.38301	AFOS	CTRL	veh
ITGAM	B12	-0.405469	AFOS	CTRL	veh
ITGAX	B12	-0.875733	AFOS	CTRL	veh
ITGB1	B12	0.595759	AFOS	CTRL	veh
ITGB3	B12	-0.802842	AFOS	CTRL	veh
ITGB5	B12	-0.793173	AFOS	CTRL	veh
ITGB6	B12	-0.752327	AFOS	CTRL	veh
ITGB7	B12	-0.748918	AFOS	CTRL	veh
ITGB8	B12	-0.365074	AFOS	CTRL	veh
ITIH3	B12	-0.692101	AFOS	CTRL	veh
ITIH4	B12	-0.804646	AFOS	CTRL	veh
ITIH6	B12	-0.640117	AFOS	CTRL	veh
ITK	B12	-0.616426	AFOS	CTRL	veh
ITLN2	B12	-0.580192	AFOS	CTRL	veh
ITM2B	B12	-1.01885	AFOS	CTRL	veh
ITPK1	B12	-0.289216	AFOS	CTRL	veh
ITPKB	B12	0.0411637	AFOS	CTRL	veh
ITPKC	B12	-0.440063	AFOS	CTRL	veh
ITPR2	B12	0.659743	AFOS	CTRL	veh
ITPR3	B12	-0.573384	AFOS	CTRL	veh
ITPRIP	B12	-0.461428	AFOS	CTRL	veh
ITSN1	B12	0.239613	AFOS	CTRL	veh
ITSN2	B12	1.23568	AFOS	CTRL	veh
IVD	B12	-1.56769	AFOS	CTRL	veh
IVL	B12	-0.42833	AFOS	CTRL	veh
IVNS1ABP	B12	-0.779919	AFOS	CTRL	veh
IZUMO1R	B12	-0.353553	AFOS	CTRL	veh
JADE2	B12	-0.684008	AFOS	CTRL	veh
JAK1	B12	0.337018	AFOS	CTRL	veh
JARID2	B12	1.32429	AFOS	CTRL	veh
JMY	B12	0.498365	AFOS	CTRL	veh
JOSD1	B12	1.13247	AFOS	CTRL	veh
JPH1	B12	-0.448385	AFOS	CTRL	veh
JPH2	B12	-0.735648	AFOS	CTRL	veh
JUN	B12	0.170499	AFOS	CTRL	veh
JUNB	B12	-1.5605	AFOS	CTRL	veh
JUND	B12	0.155631	AFOS	CTRL	veh
KALRN	B12	1.14155	AFOS	CTRL	veh
KANK1	B12	-0.0675099	AFOS	CTRL	veh
KANSL1	B12	1.05786	AFOS	CTRL	veh
KANSL3	B12	1.40366	AFOS	CTRL	veh
KCNA10	B12	-0.43594	AFOS	CTRL	veh
KCNAB1	B12	1.69782	AFOS	CTRL	veh
KCNB1	B12	0.532467	AFOS	CTRL	veh
KCNC4	B12	0.0937618	AFOS	CTRL	veh
KCND3	B12	0.667583	AFOS	CTRL	veh
KCNE1	B12	-0.601297	AFOS	CTRL	veh
KCNE1B	B12	-0.353553	AFOS	CTRL	veh
KCNE3	B12	-0.564257	AFOS	CTRL	veh
KCNE4	B12	NA	AFOS	CTRL	veh
KCNE5	B12	-0.861185	AFOS	CTRL	veh
KCNG1	B12	-0.419303	AFOS	CTRL	veh
KCNH1	B12	-0.278874	AFOS	CTRL	veh
KCNJ14	B12	0.209386	AFOS	CTRL	veh
KCNJ15	B12	-0.353553	AFOS	CTRL	veh
KCNJ16	B12	-0.729854	AFOS	CTRL	veh
KCNK1	B12	-0.599922	AFOS	CTRL	veh
KCNK12	B12	-0.724478	AFOS	CTRL	veh
KCNK3	B12	-0.876855	AFOS	CTRL	veh
KCNK4	B12	0.33476	AFOS	CTRL	veh
KCNMA1	B12	-0.692862	AFOS	CTRL	veh
KCNN3	B12	-0.45253	AFOS	CTRL	veh
KCNN4	B12	-0.521117	AFOS	CTRL	veh
KCNQ3	B12	-0.580616	AFOS	CTRL	veh
KCNQ4	B12	-0.661576	AFOS	CTRL	veh
KCP	B12	-0.592138	AFOS	CTRL	veh
KCTD1	B12	-0.737996	AFOS	CTRL	veh
KCTD12	B12	0.28794	AFOS	CTRL	veh
KCTD2	B12	-0.240657	AFOS	CTRL	veh
KCTD20	B12	1.68975	AFOS	CTRL	veh
KCTD21	B12	-0.319249	AFOS	CTRL	veh
KCTD4	B12	1.52611	AFOS	CTRL	veh
KCTD8	B12	-0.224937	AFOS	CTRL	veh
KDM2A	B12	0.7251	AFOS	CTRL	veh
KDM4B	B12	0.472113	AFOS	CTRL	veh
KDM4C	B12	1.21313	AFOS	CTRL	veh
KDM6A	B12	0.96909	AFOS	CTRL	veh
KDR	B12	1.41852	AFOS	CTRL	veh
KDSR	B12	0.93877	AFOS	CTRL	veh
KEAP1	B12	-0.917649	AFOS	CTRL	veh
KHDC1L	B12	-1.01215	AFOS	CTRL	veh
KHDRBS3	B12	0.0630347	AFOS	CTRL	veh
KIAA0040	B12	-0.353553	AFOS	CTRL	veh
KIAA0226L	B12	-0.45468	AFOS	CTRL	veh
KIAA0232	B12	1.36302	AFOS	CTRL	veh
KIAA0319L	B12	0.429143	AFOS	CTRL	veh
KIAA0355	B12	0.811405	AFOS	CTRL	veh
KIAA0368	B12	1.99522	AFOS	CTRL	veh
KIAA0430	B12	1.57341	AFOS	CTRL	veh
KIAA0907	B12	-0.848857	AFOS	CTRL	veh
KIAA0930	B12	-0.345082	AFOS	CTRL	veh
KIAA1107	B12	1.15044	AFOS	CTRL	veh
KIAA1109	B12	1.62988	AFOS	CTRL	veh
KIAA1191	B12	-0.106139	AFOS	CTRL	veh
KIAA1211L	B12	-1.04229	AFOS	CTRL	veh
KIAA1217	B12	-0.862745	AFOS	CTRL	veh
KIAA1324	B12	-0.981832	AFOS	CTRL	veh
KIAA1462	B12	1.19889	AFOS	CTRL	veh
KIAA1522	B12	0.0878243	AFOS	CTRL	veh
KIAA1551	B12	1.25974	AFOS	CTRL	veh
KIAA1671	B12	0.143886	AFOS	CTRL	veh
KIAA1683	B12	1.03862	AFOS	CTRL	veh
KIAA1755	B12	-0.497589	AFOS	CTRL	veh
KIDINS220	B12	1.16778	AFOS	CTRL	veh
KIF13A	B12	1.02623	AFOS	CTRL	veh
KIF13B	B12	0.838652	AFOS	CTRL	veh
KIF26B	B12	-0.590383	AFOS	CTRL	veh
KIF3C	B12	1.85026	AFOS	CTRL	veh
KIFC3	B12	-0.850286	AFOS	CTRL	veh
KIRREL	B12	-0.825685	AFOS	CTRL	veh
KISS1	B12	-0.454543	AFOS	CTRL	veh
KIT	B12	-0.125082	AFOS	CTRL	veh
KITLG	B12	-0.615992	AFOS	CTRL	veh
KLC1	B12	0.757215	AFOS	CTRL	veh
KLC3	B12	-0.653446	AFOS	CTRL	veh
KLF11	B12	1.09624	AFOS	CTRL	veh
KLF2	B12	-0.752687	AFOS	CTRL	veh
KLF3	B12	0.994092	AFOS	CTRL	veh
KLF4	B12	-0.720408	AFOS	CTRL	veh
KLF7	B12	-0.530471	AFOS	CTRL	veh
KLHDC7A	B12	-0.843854	AFOS	CTRL	veh
KLHDC7B	B12	-0.515297	AFOS	CTRL	veh
KLHDC8B	B12	-0.974921	AFOS	CTRL	veh
KLHL20	B12	0.680619	AFOS	CTRL	veh
KLHL21	B12	-0.154532	AFOS	CTRL	veh
KLHL26	B12	-0.438416	AFOS	CTRL	veh
KLHL29	B12	-0.43576	AFOS	CTRL	veh
KLHL30	B12	-0.882982	AFOS	CTRL	veh
KLHL35	B12	-0.98621	AFOS	CTRL	veh
KLHL38	B12	-0.902903	AFOS	CTRL	veh
KLHL6	B12	-1.142	AFOS	CTRL	veh
KLK10	B12	-1.62277	AFOS	CTRL	veh
KLK11	B12	-0.528047	AFOS	CTRL	veh
KLK13	B12	-0.353553	AFOS	CTRL	veh
KLK14	B12	-0.84157	AFOS	CTRL	veh
KLK4	B12	-0.495849	AFOS	CTRL	veh
KLK5	B12	-0.606656	AFOS	CTRL	veh
KLK6	B12	-0.709981	AFOS	CTRL	veh
KMO	B12	-0.353553	AFOS	CTRL	veh
KMT2C	B12	1.57541	AFOS	CTRL	veh
KPNA4	B12	0.270727	AFOS	CTRL	veh
KPNA6	B12	2.04195	AFOS	CTRL	veh
KPNA7	B12	-0.353553	AFOS	CTRL	veh
KPRP	B12	-0.353553	AFOS	CTRL	veh
KRCC1	B12	-0.716674	AFOS	CTRL	veh
KRT13	B12	-0.440893	AFOS	CTRL	veh
KRT14	B12	-0.577779	AFOS	CTRL	veh
KRT15	B12	-0.501836	AFOS	CTRL	veh
KRT16	B12	-0.437366	AFOS	CTRL	veh
KRT17	B12	-0.504509	AFOS	CTRL	veh
KRT18	B12	-0.612499	AFOS	CTRL	veh
KRT19	B12	-0.754238	AFOS	CTRL	veh
KRT2	B12	-0.501787	AFOS	CTRL	veh
KRT32	B12	-0.420977	AFOS	CTRL	veh
KRT34	B12	NA	AFOS	CTRL	veh
KRT4	B12	-0.814305	AFOS	CTRL	veh
KRT5	B12	-0.681738	AFOS	CTRL	veh
KRT6A	B12	-0.504754	AFOS	CTRL	veh
KRT6B	B12	-0.353553	AFOS	CTRL	veh
KRT6C	B12	-0.353553	AFOS	CTRL	veh
KRT7	B12	-0.615898	AFOS	CTRL	veh
KRT71	B12	-0.615652	AFOS	CTRL	veh
KRT75	B12	-0.472979	AFOS	CTRL	veh
KRT78	B12	-1.03948	AFOS	CTRL	veh
KRT79	B12	-0.644965	AFOS	CTRL	veh
KRT8	B12	-0.765461	AFOS	CTRL	veh
KRT80	B12	-0.553974	AFOS	CTRL	veh
KRT81	B12	-0.464615	AFOS	CTRL	veh
KRT83	B12	-0.523759	AFOS	CTRL	veh
[truncated: 30,697 more rows]

## Sheet: Panel_D
rowname	sample	value	Line	Condition	Treat
A4GALT	B12	-0.0189923	AFOS	CTRL	veh
ADAM15	B12	-0.82832	AFOS	CTRL	veh
ADM	B12	-0.990767	AFOS	CTRL	veh
ALS2CL	B12	-0.365327	AFOS	CTRL	veh
ANGPTL4	B12	-0.968533	AFOS	CTRL	veh
AP1M2	B12	0.45436	AFOS	CTRL	veh
AP1S1	B12	-1.19571	AFOS	CTRL	veh
APOBEC3C	B12	-0.777918	AFOS	CTRL	veh
ARHGEF18	B12	-0.133477	AFOS	CTRL	veh
AXIN1	B12	-0.646075	AFOS	CTRL	veh
B3GNT3	B12	-0.353553	AFOS	CTRL	veh
BIK	B12	0.427117	AFOS	CTRL	veh
BTG2	B12	-0.69598	AFOS	CTRL	veh
C1orf116	B12	-0.660631	AFOS	CTRL	veh
CD44	B12	-0.513868	AFOS	CTRL	veh
CDC42EP2	B12	-0.553778	AFOS	CTRL	veh
CDH1	B12	-0.517792	AFOS	CTRL	veh
CELSR1	B12	1.43352	AFOS	CTRL	veh
CHAC1	B12	-0.650752	AFOS	CTRL	veh
CLDN4	B12	-0.532703	AFOS	CTRL	veh
CNKSR1	B12	-0.184341	AFOS	CTRL	veh
CORO2A	B12	0.627974	AFOS	CTRL	veh
DAPP1	B12	-0.797241	AFOS	CTRL	veh
DFNA5	B12	0.176055	AFOS	CTRL	veh
DOK4	B12	-0.230422	AFOS	CTRL	veh
DSC2	B12	-0.0825759	AFOS	CTRL	veh
DSG3	B12	-0.552514	AFOS	CTRL	veh
DSP	B12	-0.651106	AFOS	CTRL	veh
EFNA1	B12	-1.23079	AFOS	CTRL	veh
EFNB1	B12	-0.855496	AFOS	CTRL	veh
EGFR	B12	-0.256213	AFOS	CTRL	veh
EHF	B12	-0.940022	AFOS	CTRL	veh
ELF3	B12	-0.73655	AFOS	CTRL	veh
EPCAM	B12	-0.71281	AFOS	CTRL	veh
EPPK1	B12	-0.816971	AFOS	CTRL	veh
EPS8L1	B12	0.520519	AFOS	CTRL	veh
ETHE1	B12	-1.10207	AFOS	CTRL	veh
EVPL	B12	0.295041	AFOS	CTRL	veh
EXT2	B12	-0.510734	AFOS	CTRL	veh
F3	B12	-0.806282	AFOS	CTRL	veh
FBXL18	B12	1.75589	AFOS	CTRL	veh
FERMT1	B12	-0.708195	AFOS	CTRL	veh
FGD6	B12	0.966825	AFOS	CTRL	veh
FGFBP1	B12	-0.570014	AFOS	CTRL	veh
FLNB	B12	-0.143963	AFOS	CTRL	veh
FST	B12	-0.674008	AFOS	CTRL	veh
G0S2	B12	-0.707866	AFOS	CTRL	veh
GJB3	B12	-0.624662	AFOS	CTRL	veh
GJB5	B12	-0.674398	AFOS	CTRL	veh
GLTP	B12	-0.477052	AFOS	CTRL	veh
GRB7	B12	-0.857752	AFOS	CTRL	veh
HBEGF	B12	-0.778034	AFOS	CTRL	veh
HES2	B12	0.490951	AFOS	CTRL	veh
HMGA2	B12	1.01067	AFOS	CTRL	veh
IER3	B12	-1.26089	AFOS	CTRL	veh
IRF6	B12	-0.622098	AFOS	CTRL	veh
ITGB4	B12	0.0341741	AFOS	CTRL	veh
ITGB6	B12	-0.752327	AFOS	CTRL	veh
JUP	B12	0.673964	AFOS	CTRL	veh
KRT1	B12	-0.353553	AFOS	CTRL	veh
KRT10	B12	-1.60266	AFOS	CTRL	veh
KRT13	B12	-0.440893	AFOS	CTRL	veh
KRT14	B12	-0.577779	AFOS	CTRL	veh
KRT15	B12	-0.501836	AFOS	CTRL	veh
KRT16	B12	-0.437366	AFOS	CTRL	veh
KRT17	B12	-0.504509	AFOS	CTRL	veh
KRT18	B12	-0.612499	AFOS	CTRL	veh
KRT19	B12	-0.754238	AFOS	CTRL	veh
KRT2	B12	-0.501787	AFOS	CTRL	veh
KRT20	B12	-0.538244	AFOS	CTRL	veh
KRT4	B12	-0.814305	AFOS	CTRL	veh
KRT5	B12	-0.681738	AFOS	CTRL	veh
KRT6A	B12	-0.504754	AFOS	CTRL	veh
KRT6B	B12	-0.353553	AFOS	CTRL	veh
KRT6C	B12	-0.353553	AFOS	CTRL	veh
KRT7	B12	-0.615898	AFOS	CTRL	veh
KRT71	B12	-0.615652	AFOS	CTRL	veh
KRT74	B12	-0.353553	AFOS	CTRL	veh
KRT75	B12	-0.472979	AFOS	CTRL	veh
KRT77	B12	-0.353553	AFOS	CTRL	veh
KRT78	B12	-1.03948	AFOS	CTRL	veh
KRT79	B12	-0.644965	AFOS	CTRL	veh
KRT8	B12	-0.765461	AFOS	CTRL	veh
KRT80	B12	-0.553974	AFOS	CTRL	veh
KRT9	B12	-0.539459	AFOS	CTRL	veh
LAD1	B12	-0.904006	AFOS	CTRL	veh
LAMA3	B12	-0.769732	AFOS	CTRL	veh
LAMA5	B12	0.0566278	AFOS	CTRL	veh
LAMB3	B12	-0.508873	AFOS	CTRL	veh
LIMK2	B12	-0.323069	AFOS	CTRL	veh
LLGL2	B12	-0.556283	AFOS	CTRL	veh
LRRC8E	B12	-0.135419	AFOS	CTRL	veh
LSR	B12	-0.308689	AFOS	CTRL	veh
MPZL2	B12	-0.613888	AFOS	CTRL	veh
MST1R	B12	-0.823796	AFOS	CTRL	veh
NQO1	B12	-0.630918	AFOS	CTRL	veh
NR2F6	B12	-0.78411	AFOS	CTRL	veh
OCLN	B12	1.50714	AFOS	CTRL	veh
PCDH1	B12	-1.01172	AFOS	CTRL	veh
PDGFB	B12	-0.698877	AFOS	CTRL	veh
PDLIM1	B12	-1.21951	AFOS	CTRL	veh
PI3	B12	-0.658195	AFOS	CTRL	veh
PIP4K2C	B12	1.17838	AFOS	CTRL	veh
PLAGL2	B12	0.316709	AFOS	CTRL	veh
PORCN	B12	0.0348682	AFOS	CTRL	veh
PPL	B12	0.733947	AFOS	CTRL	veh
PPP1R13L	B12	-0.282184	AFOS	CTRL	veh
PRRG2	B12	-1.52056	AFOS	CTRL	veh
PRSS8	B12	-0.621748	AFOS	CTRL	veh
PTGES	B12	-0.545041	AFOS	CTRL	veh
RAB11FIP1	B12	0.688502	AFOS	CTRL	veh
RAB25	B12	-0.748761	AFOS	CTRL	veh
RAB3D	B12	2.18018	AFOS	CTRL	veh
RAP1GAP2	B12	1.57363	AFOS	CTRL	veh
RASSF7	B12	-0.268748	AFOS	CTRL	veh
RELB	B12	-1.44451	AFOS	CTRL	veh
RHBDF2	B12	-0.511946	AFOS	CTRL	veh
RHOD	B12	-0.722242	AFOS	CTRL	veh
RHOF	B12	-0.579258	AFOS	CTRL	veh
RIPK4	B12	-0.48694	AFOS	CTRL	veh
RPS6KA4	B12	-0.236423	AFOS	CTRL	veh
S100A14	B12	-0.521739	AFOS	CTRL	veh
S100A2	B12	-0.697941	AFOS	CTRL	veh
SCEL	B12	-0.474485	AFOS	CTRL	veh
SCNN1A	B12	-0.844248	AFOS	CTRL	veh
SDC4	B12	-0.873206	AFOS	CTRL	veh
SEMA3F	B12	-0.42112	AFOS	CTRL	veh
SFN	B12	-0.482527	AFOS	CTRL	veh
SH2D3A	B12	-0.423973	AFOS	CTRL	veh
SH3BP1	B12	-0.255534	AFOS	CTRL	veh
SHC1	B12	-1.04739	AFOS	CTRL	veh
SLC10A3	B12	-0.620995	AFOS	CTRL	veh
SLC12A4	B12	0.878149	AFOS	CTRL	veh
SLC35F2	B12	-0.192144	AFOS	CTRL	veh
SLPI	B12	-0.835355	AFOS	CTRL	veh
SMAGP	B12	-1.55277	AFOS	CTRL	veh
SOX15	B12	-0.960854	AFOS	CTRL	veh
SPINT1	B12	-0.784694	AFOS	CTRL	veh
SSH3	B12	-0.0109725	AFOS	CTRL	veh
ST14	B12	-0.283384	AFOS	CTRL	veh
STXBP2	B12	-0.236587	AFOS	CTRL	veh
TACSTD2	B12	-0.578545	AFOS	CTRL	veh
TAPBP	B12	-0.993023	AFOS	CTRL	veh
TBC1D2	B12	-0.183908	AFOS	CTRL	veh
TFCP2L1	B12	1.68185	AFOS	CTRL	veh
TGFA	B12	-0.487089	AFOS	CTRL	veh
THBD	B12	-0.697378	AFOS	CTRL	veh
TJP1	B12	1.49112	AFOS	CTRL	veh
TMEM40	B12	-0.542137	AFOS	CTRL	veh
TMPRSS4	B12	-0.497517	AFOS	CTRL	veh
TNFRSF10B	B12	-0.962079	AFOS	CTRL	veh
TNFRSF21	B12	-0.594991	AFOS	CTRL	veh
TNFSF9	B12	-0.606299	AFOS	CTRL	veh
TNK1	B12	2.11705	AFOS	CTRL	veh
TSPAN1	B12	-0.663541	AFOS	CTRL	veh
TUFT1	B12	-0.302382	AFOS	CTRL	veh
XYLT2	B12	-0.781586	AFOS	CTRL	veh
ZBED2	B12	-0.523759	AFOS	CTRL	veh
ZFYVE21	B12	-0.991743	AFOS	CTRL	veh
A4GALT	B13	0.0954724	AFOS	CTRL	dox
ADAM15	B13	-0.703914	AFOS	CTRL	dox
ADM	B13	-0.86189	AFOS	CTRL	dox
ALS2CL	B13	-1.32282	AFOS	CTRL	dox
ANGPTL4	B13	-0.738237	AFOS	CTRL	dox
AP1M2	B13	0.559086	AFOS	CTRL	dox
AP1S1	B13	1.75584	AFOS	CTRL	dox
APOBEC3C	B13	-0.816938	AFOS	CTRL	dox
ARHGEF18	B13	-0.177439	AFOS	CTRL	dox
AXIN1	B13	-0.0565456	AFOS	CTRL	dox
B3GNT3	B13	-0.353553	AFOS	CTRL	dox
BIK	B13	0.763653	AFOS	CTRL	dox
BTG2	B13	-1.49299	AFOS	CTRL	dox
C1orf116	B13	-0.660631	AFOS	CTRL	dox
CD44	B13	-0.518094	AFOS	CTRL	dox
CDC42EP2	B13	0.0632867	AFOS	CTRL	dox
CDH1	B13	-0.680403	AFOS	CTRL	dox
CELSR1	B13	-0.803743	AFOS	CTRL	dox
CHAC1	B13	-0.542852	AFOS	CTRL	dox
CLDN4	B13	-0.485203	AFOS	CTRL	dox
CNKSR1	B13	-1.37297	AFOS	CTRL	dox
CORO2A	B13	0.2911	AFOS	CTRL	dox
DAPP1	B13	-0.631995	AFOS	CTRL	dox
DFNA5	B13	0.875839	AFOS	CTRL	dox
DOK4	B13	1.07241	AFOS	CTRL	dox
DSC2	B13	-1.22818	AFOS	CTRL	dox
DSG3	B13	-0.552514	AFOS	CTRL	dox
DSP	B13	-0.644042	AFOS	CTRL	dox
EFNA1	B13	-0.287437	AFOS	CTRL	dox
EFNB1	B13	-0.945032	AFOS	CTRL	dox
EGFR	B13	-1.06768	AFOS	CTRL	dox
EHF	B13	-0.940022	AFOS	CTRL	dox
ELF3	B13	-0.740213	AFOS	CTRL	dox
EPCAM	B13	-0.71281	AFOS	CTRL	dox
EPPK1	B13	-0.890204	AFOS	CTRL	dox
EPS8L1	B13	1.88003	AFOS	CTRL	dox
ETHE1	B13	0.890715	AFOS	CTRL	dox
EVPL	B13	-0.524873	AFOS	CTRL	dox
EXT2	B13	-0.196775	AFOS	CTRL	dox
F3	B13	-0.806282	AFOS	CTRL	dox
FBXL18	B13	-0.867374	AFOS	CTRL	dox
FERMT1	B13	-0.708195	AFOS	CTRL	dox
FGD6	B13	-1.21406	AFOS	CTRL	dox
FGFBP1	B13	-0.570014	AFOS	CTRL	dox
FLNB	B13	-1.03414	AFOS	CTRL	dox
FST	B13	-0.814607	AFOS	CTRL	dox
G0S2	B13	-0.707866	AFOS	CTRL	dox
GJB3	B13	-0.624662	AFOS	CTRL	dox
GJB5	B13	0.502091	AFOS	CTRL	dox
GLTP	B13	1.45688	AFOS	CTRL	dox
GRB7	B13	-0.868476	AFOS	CTRL	dox
HBEGF	B13	-0.610787	AFOS	CTRL	dox
HES2	B13	-0.62365	AFOS	CTRL	dox
HMGA2	B13	0.304229	AFOS	CTRL	dox
IER3	B13	-0.928153	AFOS	CTRL	dox
IRF6	B13	-0.622098	AFOS	CTRL	dox
ITGB4	B13	0.626629	AFOS	CTRL	dox
ITGB6	B13	-0.752327	AFOS	CTRL	dox
JUP	B13	0.199635	AFOS	CTRL	dox
KRT1	B13	-0.353553	AFOS	CTRL	dox
KRT10	B13	0.889853	AFOS	CTRL	dox
KRT13	B13	-0.448809	AFOS	CTRL	dox
KRT14	B13	-0.577779	AFOS	CTRL	dox
KRT15	B13	-0.501836	AFOS	CTRL	dox
KRT16	B13	-0.437366	AFOS	CTRL	dox
KRT17	B13	-0.512239	AFOS	CTRL	dox
KRT18	B13	-0.701649	AFOS	CTRL	dox
KRT19	B13	-0.754238	AFOS	CTRL	dox
KRT2	B13	-0.501787	AFOS	CTRL	dox
KRT20	B13	1.76808	AFOS	CTRL	dox
KRT4	B13	-0.814671	AFOS	CTRL	dox
KRT5	B13	-0.681738	AFOS	CTRL	dox
KRT6A	B13	-0.506908	AFOS	CTRL	dox
KRT6B	B13	-0.353553	AFOS	CTRL	dox
KRT6C	B13	-0.353553	AFOS	CTRL	dox
KRT7	B13	-0.615898	AFOS	CTRL	dox
KRT71	B13	-0.615652	AFOS	CTRL	dox
KRT74	B13	-0.353553	AFOS	CTRL	dox
KRT75	B13	-0.472979	AFOS	CTRL	dox
KRT77	B13	-0.353553	AFOS	CTRL	dox
KRT78	B13	-1.03948	AFOS	CTRL	dox
KRT79	B13	-0.644965	AFOS	CTRL	dox
KRT8	B13	-0.764199	AFOS	CTRL	dox
KRT80	B13	-0.553974	AFOS	CTRL	dox
KRT9	B13	-0.539459	AFOS	CTRL	dox
LAD1	B13	-0.904006	AFOS	CTRL	dox
LAMA3	B13	-1.12122	AFOS	CTRL	dox
LAMA5	B13	-1.23529	AFOS	CTRL	dox
LAMB3	B13	-0.511126	AFOS	CTRL	dox
LIMK2	B13	-0.55684	AFOS	CTRL	dox
LLGL2	B13	-0.115647	AFOS	CTRL	dox
LRRC8E	B13	-0.215451	AFOS	CTRL	dox
LSR	B13	-0.0806878	AFOS	CTRL	dox
MPZL2	B13	-0.613888	AFOS	CTRL	dox
MST1R	B13	-0.813169	AFOS	CTRL	dox
NQO1	B13	-1.22404	AFOS	CTRL	dox
NR2F6	B13	1.19019	AFOS	CTRL	dox
OCLN	B13	-0.337317	AFOS	CTRL	dox
PCDH1	B13	-1.25676	AFOS	CTRL	dox
PDGFB	B13	-0.698877	AFOS	CTRL	dox
PDLIM1	B13	0.279625	AFOS	CTRL	dox
PI3	B13	-0.664813	AFOS	CTRL	dox
PIP4K2C	B13	1.04911	AFOS	CTRL	dox
PLAGL2	B13	-0.746185	AFOS	CTRL	dox
PORCN	B13	0.518106	AFOS	CTRL	dox
PPL	B13	-0.289746	AFOS	CTRL	dox
PPP1R13L	B13	0.483531	AFOS	CTRL	dox
PRRG2	B13	-0.375755	AFOS	CTRL	dox
PRSS8	B13	-0.475886	AFOS	CTRL	dox
PTGES	B13	-0.588069	AFOS	CTRL	dox
RAB11FIP1	B13	-1.11398	AFOS	CTRL	dox
RAB25	B13	1.1636	AFOS	CTRL	dox
RAB3D	B13	-0.63605	AFOS	CTRL	dox
RAP1GAP2	B13	-0.695282	AFOS	CTRL	dox
RASSF7	B13	1.31103	AFOS	CTRL	dox
RELB	B13	-0.838631	AFOS	CTRL	dox
RHBDF2	B13	-0.756332	AFOS	CTRL	dox
RHOD	B13	-0.722242	AFOS	CTRL	dox
RHOF	B13	0.0926296	AFOS	CTRL	dox
RIPK4	B13	-0.449685	AFOS	CTRL	dox
RPS6KA4	B13	-0.491778	AFOS	CTRL	dox
S100A14	B13	-0.513354	AFOS	CTRL	dox
S100A2	B13	-0.659395	AFOS	CTRL	dox
SCEL	B13	-0.947415	AFOS	CTRL	dox
SCNN1A	B13	-0.872783	AFOS	CTRL	dox
SDC4	B13	-0.873206	AFOS	CTRL	dox
SEMA3F	B13	-0.316603	AFOS	CTRL	dox
SFN	B13	-0.526756	AFOS	CTRL	dox
SH2D3A	B13	1.95391	AFOS	CTRL	dox
SH3BP1	B13	0.198007	AFOS	CTRL	dox
SHC1	B13	-1.33867	AFOS	CTRL	dox
SLC10A3	B13	0.811364	AFOS	CTRL	dox
SLC12A4	B13	-1.05453	AFOS	CTRL	dox
SLC35F2	B13	-0.177631	AFOS	CTRL	dox
SLPI	B13	-0.835355	AFOS	CTRL	dox
SMAGP	B13	-0.22045	AFOS	CTRL	dox
SOX15	B13	-0.136279	AFOS	CTRL	dox
SPINT1	B13	-0.784694	AFOS	CTRL	dox
SSH3	B13	0.18685	AFOS	CTRL	dox
ST14	B13	-0.518813	AFOS	CTRL	dox
STXBP2	B13	0.555307	AFOS	CTRL	dox
TACSTD2	B13	-0.578545	AFOS	CTRL	dox
TAPBP	B13	-1.09598	AFOS	CTRL	dox
TBC1D2	B13	-0.194292	AFOS	CTRL	dox
TFCP2L1	B13	0.464416	AFOS	CTRL	dox
TGFA	B13	-0.843071	AFOS	CTRL	dox
THBD	B13	-0.697378	AFOS	CTRL	dox
TJP1	B13	-1.43055	AFOS	CTRL	dox
TMEM40	B13	-0.542137	AFOS	CTRL	dox
TMPRSS4	B13	-0.497517	AFOS	CTRL	dox
TNFRSF10B	B13	-1.62997	AFOS	CTRL	dox
TNFRSF21	B13	-1.37191	AFOS	CTRL	dox
TNFSF9	B13	-0.740815	AFOS	CTRL	dox
TNK1	B13	0.0564487	AFOS	CTRL	dox
TSPAN1	B13	-0.663541	AFOS	CTRL	dox
TUFT1	B13	-0.47595	AFOS	CTRL	dox
XYLT2	B13	-0.445171	AFOS	CTRL	dox
ZBED2	B13	-0.523759	AFOS	CTRL	dox
ZFYVE21	B13	-0.356551	AFOS	CTRL	dox
A4GALT	B15	-0.526353	AFOS	BRG1	veh
ADAM15	B15	0.968841	AFOS	BRG1	veh
ADM	B15	0.256117	AFOS	BRG1	veh
ALS2CL	B15	0.827874	AFOS	BRG1	veh
ANGPTL4	B15	0.362382	AFOS	BRG1	veh
AP1M2	B15	0.715335	AFOS	BRG1	veh
AP1S1	B15	-0.0800553	AFOS	BRG1	veh
APOBEC3C	B15	1.32943	AFOS	BRG1	veh
ARHGEF18	B15	0.0257533	AFOS	BRG1	veh
AXIN1	B15	0.611595	AFOS	BRG1	veh
B3GNT3	B15	-0.353553	AFOS	BRG1	veh
BIK	B15	1.18658	AFOS	BRG1	veh
BTG2	B15	0.039578	AFOS	BRG1	veh
C1orf116	B15	0.049035	AFOS	BRG1	veh
CD44	B15	0.512085	AFOS	BRG1	veh
CDC42EP2	B15	1.36938	AFOS	BRG1	veh
CDH1	B15	0.531657	AFOS	BRG1	veh
CELSR1	B15	1.2387	AFOS	BRG1	veh
CHAC1	B15	-0.328898	AFOS	BRG1	veh
CLDN4	B15	0.751474	AFOS	BRG1	veh
CNKSR1	B15	1.45307	AFOS	BRG1	veh
CORO2A	B15	1.22937	AFOS	BRG1	veh
DAPP1	B15	0.0262536	AFOS	BRG1	veh
DFNA5	B15	0.452073	AFOS	BRG1	veh
DOK4	B15	1.08773	AFOS	BRG1	veh
DSC2	B15	-0.150857	AFOS	BRG1	veh
DSG3	B15	-0.552514	AFOS	BRG1	veh
DSP	B15	0.331231	AFOS	BRG1	veh
EFNA1	B15	0.594553	AFOS	BRG1	veh
EFNB1	B15	1.08227	AFOS	BRG1	veh
EGFR	B15	0.379136	AFOS	BRG1	veh
EHF	B15	0.998585	AFOS	BRG1	veh
ELF3	B15	0.859071	AFOS	BRG1	veh
EPCAM	B15	-0.71281	AFOS	BRG1	veh
EPPK1	B15	0.824755	AFOS	BRG1	veh
EPS8L1	B15	0.0421227	AFOS	BRG1	veh
ETHE1	B15	0.845537	AFOS	BRG1	veh
EVPL	B15	-0.524873	AFOS	BRG1	veh
EXT2	B15	-0.0572538	AFOS	BRG1	veh
F3	B15	-0.150728	AFOS	BRG1	veh
FBXL18	B15	0.382095	AFOS	BRG1	veh
FERMT1	B15	-0.708195	AFOS	BRG1	veh
FGD6	B15	0.862034	AFOS	BRG1	veh
FGFBP1	B15	-0.0261189	AFOS	BRG1	veh
FLNB	B15	1.17927	AFOS	BRG1	veh
FST	B15	1.31695	AFOS	BRG1	veh
G0S2	B15	-0.0819654	AFOS	BRG1	veh
GJB3	B15	1.0334	AFOS	BRG1	veh
GJB5	B15	1.95249	AFOS	BRG1	veh
GLTP	B15	-1.29697	AFOS	BRG1	veh
GRB7	B15	0.500329	AFOS	BRG1	veh
HBEGF	B15	1.23706	AFOS	BRG1	veh
HES2	B15	1.10476	AFOS	BRG1	veh
HMGA2	B15	0.381512	AFOS	BRG1	veh
IER3	B15	0.357248	AFOS	BRG1	veh
IRF6	B15	1.21481	AFOS	BRG1	veh
ITGB4	B15	-1.34957	AFOS	BRG1	veh
ITGB6	B15	-0.752327	AFOS	BRG1	veh
JUP	B15	0.310538	AFOS	BRG1	veh
KRT1	B15	-0.353553	AFOS	BRG1	veh
KRT10	B15	-1.23115	AFOS	BRG1	veh
KRT13	B15	0.12411	AFOS	BRG1	veh
KRT14	B15	0.485282	AFOS	BRG1	veh
KRT15	B15	0.458149	AFOS	BRG1	veh
KRT16	B15	0.198515	AFOS	BRG1	veh
KRT17	B15	0.619559	AFOS	BRG1	veh
KRT18	B15	0.385017	AFOS	BRG1	veh
KRT19	B15	-0.0646213	AFOS	BRG1	veh
KRT2	B15	-0.501787	AFOS	BRG1	veh
KRT20	B15	-0.538244	AFOS	BRG1	veh
KRT4	B15	0.158811	AFOS	BRG1	veh
KRT5	B15	-0.409531	AFOS	BRG1	veh
KRT6A	B15	0.674482	AFOS	BRG1	veh
KRT6B	B15	-0.353553	AFOS	BRG1	veh
KRT6C	B15	-0.353553	AFOS	BRG1	veh
KRT7	B15	0.989757	AFOS	BRG1	veh
KRT71	B15	1.94921	AFOS	BRG1	veh
KRT74	B15	-0.353553	AFOS	BRG1	veh
KRT75	B15	0.515895	AFOS	BRG1	veh
KRT77	B15	-0.353553	AFOS	BRG1	veh
KRT78	B15	1.45549	AFOS	BRG1	veh
KRT79	B15	-0.274268	AFOS	BRG1	veh
KRT8	B15	-0.0373118	AFOS	BRG1	veh
KRT80	B15	1.25399	AFOS	BRG1	veh
KRT9	B15	1.7067	AFOS	BRG1	veh
LAD1	B15	-0.12121	AFOS	BRG1	veh
LAMA3	B15	0.532637	AFOS	BRG1	veh
LAMA5	B15	1.51485	AFOS	BRG1	veh
LAMB3	B15	0.511603	AFOS	BRG1	veh
LIMK2	B15	1.56936	AFOS	BRG1	veh
LLGL2	B15	1.56224	AFOS	BRG1	veh
LRRC8E	B15	-0.738941	AFOS	BRG1	veh
LSR	B15	-0.203227	AFOS	BRG1	veh
MPZL2	B15	-0.495651	AFOS	BRG1	veh
MST1R	B15	0.297545	AFOS	BRG1	veh
NQO1	B15	0.421515	AFOS	BRG1	veh
NR2F6	B15	-0.719384	AFOS	BRG1	veh
OCLN	B15	0.2988	AFOS	BRG1	veh
PCDH1	B15	0.781329	AFOS	BRG1	veh
PDGFB	B15	0.238008	AFOS	BRG1	veh
PDLIM1	B15	0.844489	AFOS	BRG1	veh
PI3	B15	1.12506	AFOS	BRG1	veh
PIP4K2C	B15	-0.381183	AFOS	BRG1	veh
PLAGL2	B15	0.996996	AFOS	BRG1	veh
PORCN	B15	-0.208414	AFOS	BRG1	veh
PPL	B15	1.74052	AFOS	BRG1	veh
PPP1R13L	B15	0.271177	AFOS	BRG1	veh
PRRG2	B15	-0.697435	AFOS	BRG1	veh
PRSS8	B15	1.60872	AFOS	BRG1	veh
PTGES	B15	1.15236	AFOS	BRG1	veh
RAB11FIP1	B15	1.37239	AFOS	BRG1	veh
RAB25	B15	-0.748761	AFOS	BRG1	veh
RAB3D	B15	0.152542	AFOS	BRG1	veh
RAP1GAP2	B15	0.78662	AFOS	BRG1	veh
RASSF7	B15	-1.11034	AFOS	BRG1	veh
RELB	B15	0.70695	AFOS	BRG1	veh
RHBDF2	B15	0.366831	AFOS	BRG1	veh
RHOD	B15	-0.722242	AFOS	BRG1	veh
RHOF	B15	0.40732	AFOS	BRG1	veh
RIPK4	B15	0.286197	AFOS	BRG1	veh
RPS6KA4	B15	0.457255	AFOS	BRG1	veh
S100A14	B15	0.554104	AFOS	BRG1	veh
S100A2	B15	0.668339	AFOS	BRG1	veh
SCEL	B15	1.49367	AFOS	BRG1	veh
SCNN1A	B15	0.485868	AFOS	BRG1	veh
SDC4	B15	-0.15822	AFOS	BRG1	veh
SEMA3F	B15	1.68073	AFOS	BRG1	veh
SFN	B15	0.571463	AFOS	BRG1	veh
SH2D3A	B15	-1.23553	AFOS	BRG1	veh
SH3BP1	B15	-0.977155	AFOS	BRG1	veh
SHC1	B15	0.502441	AFOS	BRG1	veh
SLC10A3	B15	-0.569497	AFOS	BRG1	veh
SLC12A4	B15	0.685559	AFOS	BRG1	veh
SLC35F2	B15	-0.175463	AFOS	BRG1	veh
SLPI	B15	0.160967	AFOS	BRG1	veh
SMAGP	B15	0.520761	AFOS	BRG1	veh
SOX15	B15	0.572969	AFOS	BRG1	veh
SPINT1	B15	0.570762	AFOS	BRG1	veh
SSH3	B15	0.613252	AFOS	BRG1	veh
ST14	B15	1.05531	AFOS	BRG1	veh
STXBP2	B15	-0.47171	AFOS	BRG1	veh
TACSTD2	B15	-0.578545	AFOS	BRG1	veh
TAPBP	B15	0.449082	AFOS	BRG1	veh
TBC1D2	B15	0.486802	AFOS	BRG1	veh
TFCP2L1	B15	-0.122788	AFOS	BRG1	veh
TGFA	B15	1.11628	AFOS	BRG1	veh
THBD	B15	-0.697378	AFOS	BRG1	veh
TJP1	B15	1.14339	AFOS	BRG1	veh
TMEM40	B15	0.405815	AFOS	BRG1	veh
TMPRSS4	B15	0.0662197	AFOS	BRG1	veh
TNFRSF10B	B15	0.280988	AFOS	BRG1	veh
TNFRSF21	B15	0.701942	AFOS	BRG1	veh
TNFSF9	B15	0.586433	AFOS	BRG1	veh
TNK1	B15	0.27699	AFOS	BRG1	veh
TSPAN1	B15	0.76968	AFOS	BRG1	veh
TUFT1	B15	1.02043	AFOS	BRG1	veh
XYLT2	B15	-0.371831	AFOS	BRG1	veh
ZBED2	B15	2.02748	AFOS	BRG1	veh
ZFYVE21	B15	-0.365166	AFOS	BRG1	veh
A4GALT	B16	-0.837004	AFOS	BRG1	dox
ADAM15	B16	-0.186529	AFOS	BRG1	dox
ADM	B16	-0.456315	AFOS	BRG1	dox
ALS2CL	B16	1.56541	AFOS	BRG1	dox
ANGPTL4	B16	0.110003	AFOS	BRG1	dox
AP1M2	B16	-0.150575	AFOS	BRG1	dox
AP1S1	B16	-1.1815	AFOS	BRG1	dox
APOBEC3C	B16	-0.128497	AFOS	BRG1	dox
ARHGEF18	B16	-0.379759	AFOS	BRG1	dox
AXIN1	B16	-1.43577	AFOS	BRG1	dox
B3GNT3	B16	-0.353553	AFOS	BRG1	dox
BIK	B16	-0.200513	AFOS	BRG1	dox
BTG2	B16	-0.148998	AFOS	BRG1	dox
C1orf116	B16	-0.660631	AFOS	BRG1	dox
CD44	B16	-0.47731	AFOS	BRG1	dox
CDC42EP2	B16	-1.14682	AFOS	BRG1	dox
CDH1	B16	-0.663262	AFOS	BRG1	dox
CELSR1	B16	-0.107681	AFOS	BRG1	dox
CHAC1	B16	0.0804205	AFOS	BRG1	dox
CLDN4	B16	-0.397325	AFOS	BRG1	dox
CNKSR1	B16	-0.344851	AFOS	BRG1	dox
CORO2A	B16	1.09729	AFOS	BRG1	dox
DAPP1	B16	0.456706	AFOS	BRG1	dox
DFNA5	B16	-0.771765	AFOS	BRG1	dox
DOK4	B16	0.622919	AFOS	BRG1	dox
DSC2	B16	-1.17357	AFOS	BRG1	dox
DSG3	B16	-0.552514	AFOS	BRG1	dox
DSP	B16	-0.400404	AFOS	BRG1	dox
EFNA1	B16	-0.213922	AFOS	BRG1	dox
EFNB1	B16	0.128454	AFOS	BRG1	dox
EGFR	B16	-0.57665	AFOS	BRG1	dox
EHF	B16	-0.39044	AFOS	BRG1	dox
ELF3	B16	-0.0744955	AFOS	BRG1	dox
EPCAM	B16	0.0749582	AFOS	BRG1	dox
EPPK1	B16	0.961725	AFOS	BRG1	dox
EPS8L1	B16	0.123826	AFOS	BRG1	dox
ETHE1	B16	-0.871288	AFOS	BRG1	dox
EVPL	B16	2.35265	AFOS	BRG1	dox
EXT2	B16	-1.02092	AFOS	BRG1	dox
F3	B16	-0.806282	AFOS	BRG1	dox
FBXL18	B16	0.00449261	AFOS	BRG1	dox
FERMT1	B16	-0.708195	AFOS	BRG1	dox
FGD6	B16	0.890315	AFOS	BRG1	dox
FGFBP1	B16	-0.570014	AFOS	BRG1	dox
FLNB	B16	0.453172	AFOS	BRG1	dox
FST	B16	-0.788972	AFOS	BRG1	dox
G0S2	B16	-0.707866	AFOS	BRG1	dox
GJB3	B16	-0.624662	AFOS	BRG1	dox
GJB5	B16	0.019382	AFOS	BRG1	dox
GLTP	B16	-0.143377	AFOS	BRG1	dox
GRB7	B16	0.606645	AFOS	BRG1	dox
HBEGF	B16	-0.0125	AFOS	BRG1	dox
HES2	B16	-0.694954	AFOS	BRG1	dox
HMGA2	B16	1.14961	AFOS	BRG1	dox
IER3	B16	1.01644	AFOS	BRG1	dox
IRF6	B16	-0.37373	AFOS	BRG1	dox
ITGB4	B16	0.199896	AFOS	BRG1	dox
ITGB6	B16	-0.388075	AFOS	BRG1	dox
JUP	B16	0.000206552	AFOS	BRG1	dox
KRT1	B16	-0.353553	AFOS	BRG1	dox
KRT10	B16	0.150424	AFOS	BRG1	dox
KRT13	B16	-0.40019	AFOS	BRG1	dox
KRT14	B16	-0.464219	AFOS	BRG1	dox
KRT15	B16	-0.412106	AFOS	BRG1	dox
KRT16	B16	-0.4249	AFOS	BRG1	dox
KRT17	B16	-0.468154	AFOS	BRG1	dox
KRT18	B16	-0.49828	AFOS	BRG1	dox
KRT19	B16	-0.754238	AFOS	BRG1	dox
KRT2	B16	2.19711	AFOS	BRG1	dox
KRT20	B16	1.46138	AFOS	BRG1	dox
KRT4	B16	0.202515	AFOS	BRG1	dox
KRT5	B16	-0.681738	AFOS	BRG1	dox
KRT6A	B16	-0.501239	AFOS	BRG1	dox
KRT6B	B16	-0.353553	AFOS	BRG1	dox
KRT6C	B16	-0.353553	AFOS	BRG1	dox
KRT7	B16	-0.391032	AFOS	BRG1	dox
KRT71	B16	-0.371188	AFOS	BRG1	dox
KRT74	B16	-0.353553	AFOS	BRG1	dox
KRT75	B16	-0.472979	AFOS	BRG1	dox
KRT77	B16	-0.353553	AFOS	BRG1	dox
KRT78	B16	0.799523	AFOS	BRG1	dox
KRT79	B16	0.0381212	AFOS	BRG1	dox
KRT8	B16	0.397513	AFOS	BRG1	dox
KRT80	B16	-0.502121	AFOS	BRG1	dox
KRT9	B16	1.53005	AFOS	BRG1	dox
LAD1	B16	0.105718	AFOS	BRG1	dox
LAMA3	B16	-0.47326	AFOS	BRG1	dox
LAMA5	B16	0.660486	AFOS	BRG1	dox
LAMB3	B16	-0.464341	AFOS	BRG1	dox
LIMK2	B16	0.495426	AFOS	BRG1	dox
LLGL2	B16	0.255867	AFOS	BRG1	dox
LRRC8E	B16	2.21125	AFOS	BRG1	dox
LSR	B16	-0.491963	AFOS	BRG1	dox
MPZL2	B16	0.802298	AFOS	BRG1	dox
MST1R	B16	0.0419808	AFOS	BRG1	dox
NQO1	B16	-0.261096	AFOS	BRG1	dox
NR2F6	B16	-0.231292	AFOS	BRG1	dox
OCLN	B16	-0.392501	AFOS	BRG1	dox
PCDH1	B16	0.67079	AFOS	BRG1	dox
PDGFB	B16	2.07838	AFOS	BRG1	dox
PDLIM1	B16	-0.0866309	AFOS	BRG1	dox
PI3	B16	-0.397704	AFOS	BRG1	dox
PIP4K2C	B16	0.0615977	AFOS	BRG1	dox
PLAGL2	B16	0.92888	AFOS	BRG1	dox
PORCN	B16	1.22488	AFOS	BRG1	dox
PPL	B16	-0.187318	AFOS	BRG1	dox
PPP1R13L	B16	0.515606	AFOS	BRG1	dox
PRRG2	B16	0.0906873	AFOS	BRG1	dox
PRSS8	B16	-0.463667	AFOS	BRG1	dox
PTGES	B16	-0.447848	AFOS	BRG1	dox
RAB11FIP1	B16	0.0317996	AFOS	BRG1	dox
RAB25	B16	-0.748761	AFOS	BRG1	dox
RAB3D	B16	-0.491382	AFOS	BRG1	dox
RAP1GAP2	B16	0.587172	AFOS	BRG1	dox
RASSF7	B16	-0.02474	AFOS	BRG1	dox
RELB	B16	1.18645	AFOS	BRG1	dox
RHBDF2	B16	-0.478873	AFOS	BRG1	dox
RHOD	B16	-0.722242	AFOS	BRG1	dox
RHOF	B16	-0.447549	AFOS	BRG1	dox
RIPK4	B16	-0.096439	AFOS	BRG1	dox
RPS6KA4	B16	-0.552134	AFOS	BRG1	dox
S100A14	B16	-0.400591	AFOS	BRG1	dox
S100A2	B16	-0.308039	AFOS	BRG1	dox
SCEL	B16	-0.839452	AFOS	BRG1	dox
SCNN1A	B16	0.278871	AFOS	BRG1	dox
SDC4	B16	-0.37914	AFOS	BRG1	dox
SEMA3F	B16	0.57885	AFOS	BRG1	dox
SFN	B16	-0.497392	AFOS	BRG1	dox
SH2D3A	B16	-0.0308504	AFOS	BRG1	dox
SH3BP1	B16	0.324176	AFOS	BRG1	dox
SHC1	B16	-0.264367	AFOS	BRG1	dox
SLC10A3	B16	-1.54887	AFOS	BRG1	dox
SLC12A4	B16	0.301234	AFOS	BRG1	dox
SLC35F2	B16	-1.35737	AFOS	BRG1	dox
SLPI	B16	1.00058	AFOS	BRG1	dox
SMAGP	B16	-0.401908	AFOS	BRG1	dox
SOX15	B16	-0.614497	AFOS	BRG1	dox
SPINT1	B16	-0.784694	AFOS	BRG1	dox
SSH3	B16	0.329707	AFOS	BRG1	dox
ST14	B16	-0.550878	AFOS	BRG1	dox
STXBP2	B16	-0.333067	AFOS	BRG1	dox
TACSTD2	B16	-0.578545	AFOS	BRG1	dox
TAPBP	B16	0.31217	AFOS	BRG1	dox
TBC1D2	B16	0.0164577	AFOS	BRG1	dox
TFCP2L1	B16	0.409672	AFOS	BRG1	dox
TGFA	B16	-0.255408	AFOS	BRG1	dox
THBD	B16	-0.697378	AFOS	BRG1	dox
TJP1	B16	-0.163053	AFOS	BRG1	dox
TMEM40	B16	-0.479752	AFOS	BRG1	dox
TMPRSS4	B16	0.021884	AFOS	BRG1	dox
TNFRSF10B	B16	0.293847	AFOS	BRG1	dox
TNFRSF21	B16	-0.259251	AFOS	BRG1	dox
TNFSF9	B16	-0.186499	AFOS	BRG1	dox
TNK1	B16	0.0212947	AFOS	BRG1	dox
TSPAN1	B16	-0.358809	AFOS	BRG1	dox
TUFT1	B16	-0.45726	AFOS	BRG1	dox
XYLT2	B16	-0.486335	AFOS	BRG1	dox
ZBED2	B16	-0.523759	AFOS	BRG1	dox
ZFYVE21	B16	-0.92886	AFOS	BRG1	dox
A4GALT	B22	2.30818	AFOS	CTRL	veh
ADAM15	B22	1.31433	AFOS	CTRL	veh
ADM	B22	0.056106	AFOS	CTRL	veh
ALS2CL	B22	0.572006	AFOS	CTRL	veh
ANGPTL4	B22	-0.836846	AFOS	CTRL	veh
AP1M2	B22	1.05731	AFOS	CTRL	veh
AP1S1	B22	0.148504	AFOS	CTRL	veh
APOBEC3C	B22	-0.704896	AFOS	CTRL	veh
ARHGEF18	B22	-1.51559	AFOS	CTRL	veh
AXIN1	B22	0.419579	AFOS	CTRL	veh
B3GNT3	B22	-0.353553	AFOS	CTRL	veh
BIK	B22	-1.19161	AFOS	CTRL	veh
BTG2	B22	-0.305	AFOS	CTRL	veh
C1orf116	B22	-0.660631	AFOS	CTRL	veh
CD44	B22	-0.518094	AFOS	CTRL	veh
CDC42EP2	B22	0.0969465	AFOS	CTRL	veh
CDH1	B22	-0.975754	AFOS	CTRL	veh
CELSR1	B22	0.570086	AFOS	CTRL	veh
CHAC1	B22	-0.930142	AFOS	CTRL	veh
CLDN4	B22	-0.603632	AFOS	CTRL	veh
CNKSR1	B22	-0.640503	AFOS	CTRL	veh
CORO2A	B22	-1.73047	AFOS	CTRL	veh
DAPP1	B22	-0.823703	AFOS	CTRL	veh
DFNA5	B22	1.51535	AFOS	CTRL	veh
DOK4	B22	-1.71642	AFOS	CTRL	veh
DSC2	B22	1.7881	AFOS	CTRL	veh
DSG3	B22	-0.552514	AFOS	CTRL	veh
DSP	B22	-0.623864	AFOS	CTRL	veh
EFNA1	B22	-0.886118	AFOS	CTRL	veh
EFNB1	B22	-0.677717	AFOS	CTRL	veh
EGFR	B22	-0.572329	AFOS	CTRL	veh
EHF	B22	-0.940022	AFOS	CTRL	veh
ELF3	B22	-0.728311	AFOS	CTRL	veh
EPCAM	B22	0.206452	AFOS	CTRL	veh
EPPK1	B22	-1.06838	AFOS	CTRL	veh
EPS8L1	B22	0.278678	AFOS	CTRL	veh
ETHE1	B22	1.05582	AFOS	CTRL	veh
EVPL	B22	-0.524873	AFOS	CTRL	veh
EXT2	B22	1.0355	AFOS	CTRL	veh
F3	B22	-0.806282	AFOS	CTRL	veh
FBXL18	B22	-0.949865	AFOS	CTRL	veh
FERMT1	B22	-0.708195	AFOS	CTRL	veh
FGD6	B22	-1.30772	AFOS	CTRL	veh
FGFBP1	B22	-0.570014	AFOS	CTRL	veh
FLNB	B22	-1.21624	AFOS	CTRL	veh
FST	B22	-0.80525	AFOS	CTRL	veh
G0S2	B22	-0.707866	AFOS	CTRL	veh
GJB3	B22	2.04932	AFOS	CTRL	veh
GJB5	B22	-1.41356	AFOS	CTRL	veh
GLTP	B22	-1.21751	AFOS	CTRL	veh
GRB7	B22	-1.18947	AFOS	CTRL	veh
HBEGF	B22	-1.34032	AFOS	CTRL	veh
HES2	B22	0.980449	AFOS	CTRL	veh
HMGA2	B22	0.380394	AFOS	CTRL	veh
IER3	B22	-0.426686	AFOS	CTRL	veh
IRF6	B22	-0.622098	AFOS	CTRL	veh
ITGB4	B22	1.82336	AFOS	CTRL	veh
ITGB6	B22	-0.752327	AFOS	CTRL	veh
JUP	B22	1.65556	AFOS	CTRL	veh
KRT1	B22	-0.353553	AFOS	CTRL	veh
KRT10	B22	-0.389598	AFOS	CTRL	veh
KRT13	B22	-0.448809	AFOS	CTRL	veh
KRT14	B22	-0.577779	AFOS	CTRL	veh
KRT15	B22	-0.456961	AFOS	CTRL	veh
KRT16	B22	-0.437366	AFOS	CTRL	veh
KRT17	B22	-0.502346	AFOS	CTRL	veh
KRT18	B22	-0.646884	AFOS	CTRL	veh
KRT19	B22	-0.754238	AFOS	CTRL	veh
KRT2	B22	-0.501787	AFOS	CTRL	veh
KRT20	B22	-0.538244	AFOS	CTRL	veh
KRT4	B22	-0.814653	AFOS	CTRL	veh
KRT5	B22	-0.681738	AFOS	CTRL	veh
KRT6A	B22	-0.506908	AFOS	CTRL	veh
KRT6B	B22	-0.353553	AFOS	CTRL	veh
KRT6C	B22	-0.353553	AFOS	CTRL	veh
KRT7	B22	-0.615898	AFOS	CTRL	veh
KRT71	B22	-0.615652	AFOS	CTRL	veh
KRT74	B22	-0.353553	AFOS	CTRL	veh
KRT75	B22	-0.472979	AFOS	CTRL	veh
KRT77	B22	-0.353553	AFOS	CTRL	veh
KRT78	B22	-0.502991	AFOS	CTRL	veh
KRT79	B22	-0.644965	AFOS	CTRL	veh
KRT8	B22	-0.761146	AFOS	CTRL	veh
KRT80	B22	-0.54641	AFOS	CTRL	veh
KRT9	B22	-0.539459	AFOS	CTRL	veh
LAD1	B22	-0.567358	AFOS	CTRL	veh
LAMA3	B22	-0.733033	AFOS	CTRL	veh
LAMA5	B22	0.175876	AFOS	CTRL	veh
LAMB3	B22	-0.499592	AFOS	CTRL	veh
LIMK2	B22	-1.24488	AFOS	CTRL	veh
LLGL2	B22	1.08428	AFOS	CTRL	veh
LRRC8E	B22	-0.738941	AFOS	CTRL	veh
LSR	B22	2.22291	AFOS	CTRL	veh
MPZL2	B22	-0.613888	AFOS	CTRL	veh
MST1R	B22	-0.00638728	AFOS	CTRL	veh
NQO1	B22	0.309732	AFOS	CTRL	veh
NR2F6	B22	1.77377	AFOS	CTRL	veh
OCLN	B22	0.800958	AFOS	CTRL	veh
PCDH1	B22	-0.222983	AFOS	CTRL	veh
PDGFB	B22	-0.698877	AFOS	CTRL	veh
PDLIM1	B22	-0.678594	AFOS	CTRL	veh
PI3	B22	-0.651261	AFOS	CTRL	veh
PIP4K2C	B22	-1.85862	AFOS	CTRL	veh
PLAGL2	B22	-1.61515	AFOS	CTRL	veh
PORCN	B22	-0.0500992	AFOS	CTRL	veh
PPL	B22	-0.705772	AFOS	CTRL	veh
PPP1R13L	B22	1.66951	AFOS	CTRL	veh
PRRG2	B22	-0.203247	AFOS	CTRL	veh
PRSS8	B22	-0.584854	AFOS	CTRL	veh
PTGES	B22	-0.562896	AFOS	CTRL	veh
RAB11FIP1	B22	-1.04561	AFOS	CTRL	veh
RAB25	B22	1.76649	AFOS	CTRL	veh
RAB3D	B22	0.577057	AFOS	CTRL	veh
RAP1GAP2	B22	-1.3171	AFOS	CTRL	veh
RASSF7	B22	1.26313	AFOS	CTRL	veh
RELB	B22	0.769345	AFOS	CTRL	veh
RHBDF2	B22	1.56608	AFOS	CTRL	veh
RHOD	B22	-0.722242	AFOS	CTRL	veh
RHOF	B22	1.86583	AFOS	CTRL	veh
RIPK4	B22	-1.26444	AFOS	CTRL	veh
RPS6KA4	B22	2.11113	AFOS	CTRL	veh
S100A14	B22	-0.513159	AFOS	CTRL	veh
S100A2	B22	-0.697941	AFOS	CTRL	veh
SCEL	B22	1.0628	AFOS	CTRL	veh
SCNN1A	B22	-0.872783	AFOS	CTRL	veh
SDC4	B22	-0.873206	AFOS	CTRL	veh
SEMA3F	B22	-0.806453	AFOS	CTRL	veh
SFN	B22	-0.412983	AFOS	CTRL	veh
SH2D3A	B22	0.0964081	AFOS	CTRL	veh
SH3BP1	B22	2.12802	AFOS	CTRL	veh
SHC1	B22	0.857325	AFOS	CTRL	veh
SLC10A3	B22	-0.00720884	AFOS	CTRL	veh
SLC12A4	B22	-0.320655	AFOS	CTRL	veh
SLC35F2	B22	1.97134	AFOS	CTRL	veh
SLPI	B22	-0.835355	AFOS	CTRL	veh
SMAGP	B22	-0.590373	AFOS	CTRL	veh
SOX15	B22	-0.84256	AFOS	CTRL	veh
SPINT1	B22	-0.784694	AFOS	CTRL	veh
SSH3	B22	1.52963	AFOS	CTRL	veh
ST14	B22	-0.515982	AFOS	CTRL	veh
STXBP2	B22	1.89184	AFOS	CTRL	veh
TACSTD2	B22	-0.578545	AFOS	CTRL	veh
TAPBP	B22	1.8292	AFOS	CTRL	veh
TBC1D2	B22	-1.12279	AFOS	CTRL	veh
TFCP2L1	B22	-1.73259	AFOS	CTRL	veh
TGFA	B22	-0.946882	AFOS	CTRL	veh
THBD	B22	-0.697378	AFOS	CTRL	veh
TJP1	B22	-0.558632	AFOS	CTRL	veh
TMEM40	B22	-0.542137	AFOS	CTRL	veh
TMPRSS4	B22	-0.497517	AFOS	CTRL	veh
TNFRSF10B	B22	1.54107	AFOS	CTRL	veh
TNFRSF21	B22	0.407698	AFOS	CTRL	veh
TNFSF9	B22	-0.66858	AFOS	CTRL	veh
TNK1	B22	-1.1958	AFOS	CTRL	veh
TSPAN1	B22	-0.663541	AFOS	CTRL	veh
TUFT1	B22	-0.745948	AFOS	CTRL	veh
XYLT2	B22	-1.09854	AFOS	CTRL	veh
ZBED2	B22	-0.523759	AFOS	CTRL	veh
ZFYVE21	B22	0.115242	AFOS	CTRL	veh
A4GALT	B23	-0.398504	AFOS	CTRL	dox
ADAM15	B23	-0.709154	AFOS	CTRL	dox
ADM	B23	-0.611532	AFOS	CTRL	dox
ALS2CL	B23	-0.37533	AFOS	CTRL	dox
ANGPTL4	B23	-0.779732	AFOS	CTRL	dox
AP1M2	B23	-0.360515	AFOS	CTRL	dox
AP1S1	B23	0.475445	AFOS	CTRL	dox
APOBEC3C	B23	-0.762067	AFOS	CTRL	dox
ARHGEF18	B23	-0.634441	AFOS	CTRL	dox
AXIN1	B23	-0.690687	AFOS	CTRL	dox
B3GNT3	B23	-0.353553	AFOS	CTRL	dox
BIK	B23	-0.845796	AFOS	CTRL	dox
BTG2	B23	0.0150271	AFOS	CTRL	dox
C1orf116	B23	-0.202626	AFOS	CTRL	dox
CD44	B23	-0.372657	AFOS	CTRL	dox
CDC42EP2	B23	-0.647671	AFOS	CTRL	dox
CDH1	B23	-0.563628	AFOS	CTRL	dox
CELSR1	B23	-0.716032	AFOS	CTRL	dox
CHAC1	B23	-0.59836	AFOS	CTRL	dox
CLDN4	B23	-0.563843	AFOS	CTRL	dox
CNKSR1	B23	-0.725443	AFOS	CTRL	dox
CORO2A	B23	-0.449959	AFOS	CTRL	dox
DAPP1	B23	-0.822302	AFOS	CTRL	dox
DFNA5	B23	0.217899	AFOS	CTRL	dox
DOK4	B23	-0.422068	AFOS	CTRL	dox
DSC2	B23	0.556617	AFOS	CTRL	dox
DSG3	B23	0.673128	AFOS	CTRL	dox
DSP	B23	-0.501665	AFOS	CTRL	dox
EFNA1	B23	-0.385611	AFOS	CTRL	dox
EFNB1	B23	-0.878705	AFOS	CTRL	dox
EGFR	B23	-0.384029	AFOS	CTRL	dox
EHF	B23	0.0705132	AFOS	CTRL	dox
ELF3	B23	-0.722915	AFOS	CTRL	dox
EPCAM	B23	2.18418	AFOS	CTRL	dox
EPPK1	B23	-0.923071	AFOS	CTRL	dox
EPS8L1	B23	-1.08441	AFOS	CTRL	dox
ETHE1	B23	-0.532694	AFOS	CTRL	dox
EVPL	B23	-0.524873	AFOS	CTRL	dox
EXT2	B23	0.671581	AFOS	CTRL	dox
F3	B23	0.674503	AFOS	CTRL	dox
FBXL18	B23	-0.935047	AFOS	CTRL	dox
FERMT1	B23	0.853209	AFOS	CTRL	dox
FGD6	B23	-1.00575	AFOS	CTRL	dox
FGFBP1	B23	-0.570014	AFOS	CTRL	dox
FLNB	B23	-0.978166	AFOS	CTRL	dox
FST	B23	-0.0384992	AFOS	CTRL	dox
G0S2	B23	2.11974	AFOS	CTRL	dox
GJB3	B23	-0.624662	AFOS	CTRL	dox
GJB5	B23	-0.612212	AFOS	CTRL	dox
GLTP	B23	1.07023	AFOS	CTRL	dox
GRB7	B23	-0.646385	AFOS	CTRL	dox
HBEGF	B23	-0.635417	AFOS	CTRL	dox
HES2	B23	-0.388296	AFOS	CTRL	dox
HMGA2	B23	-0.423415	AFOS	CTRL	dox
IER3	B23	-0.912781	AFOS	CTRL	dox
IRF6	B23	-0.596002	AFOS	CTRL	dox
ITGB4	B23	-0.910126	AFOS	CTRL	dox
ITGB6	B23	0.587194	AFOS	CTRL	dox
JUP	B23	-0.181695	AFOS	CTRL	dox
KRT1	B23	-0.353553	AFOS	CTRL	dox
KRT10	B23	0.793771	AFOS	CTRL	dox
KRT13	B23	-0.448809	AFOS	CTRL	dox
KRT14	B23	-0.194967	AFOS	CTRL	dox
KRT15	B23	-0.501836	AFOS	CTRL	dox
KRT16	B23	-0.437366	AFOS	CTRL	dox
KRT17	B23	-0.464434	AFOS	CTRL	dox
KRT18	B23	-0.548237	AFOS	CTRL	dox
KRT19	B23	0.024626	AFOS	CTRL	dox
KRT2	B23	-0.501787	AFOS	CTRL	dox
KRT20	B23	-0.538244	AFOS	CTRL	dox
KRT4	B23	-0.809199	AFOS	CTRL	dox
KRT5	B23	0.855438	AFOS	CTRL	dox
KRT6A	B23	-0.460579	AFOS	CTRL	dox
KRT6B	B23	2.47487	AFOS	CTRL	dox
KRT6C	B23	-0.353553	AFOS	CTRL	dox
KRT7	B23	-0.470821	AFOS	CTRL	dox
KRT71	B23	-0.615652	AFOS	CTRL	dox
KRT74	B23	-0.353553	AFOS	CTRL	dox
KRT75	B23	-0.472979	AFOS	CTRL	dox
KRT77	B23	-0.353553	AFOS	CTRL	dox
KRT78	B23	-0.47591	AFOS	CTRL	dox
KRT79	B23	-0.644965	AFOS	CTRL	dox
KRT8	B23	-0.763621	AFOS	CTRL	dox
KRT80	B23	-0.553974	AFOS	CTRL	dox
KRT9	B23	-0.539459	AFOS	CTRL	dox
LAD1	B23	-0.550365	AFOS	CTRL	dox
LAMA3	B23	0.450775	AFOS	CTRL	dox
LAMA5	B23	-0.882918	AFOS	CTRL	dox
LAMB3	B23	-0.457814	AFOS	CTRL	dox
LIMK2	B23	-0.942412	AFOS	CTRL	dox
LLGL2	B23	-0.585532	AFOS	CTRL	dox
LRRC8E	B23	-0.368027	AFOS	CTRL	dox
LSR	B23	0.513448	AFOS	CTRL	dox
MPZL2	B23	-0.48035	AFOS	CTRL	dox
MST1R	B23	-0.756678	AFOS	CTRL	dox
NQO1	B23	-1.1879	AFOS	CTRL	dox
NR2F6	B23	-0.017893	AFOS	CTRL	dox
OCLN	B23	-0.311094	AFOS	CTRL	dox
PCDH1	B23	-1.04444	AFOS	CTRL	dox
PDGFB	B23	-0.698877	AFOS	CTRL	dox
PDLIM1	B23	-0.942226	AFOS	CTRL	dox
PI3	B23	-0.600751	AFOS	CTRL	dox
PIP4K2C	B23	-0.590895	AFOS	CTRL	dox
PLAGL2	B23	-1.01932	AFOS	CTRL	dox
PORCN	B23	0.492285	AFOS	CTRL	dox
PPL	B23	-1.00489	AFOS	CTRL	dox
PPP1R13L	B23	-0.59934	AFOS	CTRL	dox
PRRG2	B23	-0.0951018	AFOS	CTRL	dox
PRSS8	B23	-0.582992	AFOS	CTRL	dox
PTGES	B23	-0.57044	AFOS	CTRL	dox
RAB11FIP1	B23	-0.989765	AFOS	CTRL	dox
RAB25	B23	-0.342267	AFOS	CTRL	dox
RAB3D	B23	-0.530485	AFOS	CTRL	dox
RAP1GAP2	B23	-0.458315	AFOS	CTRL	dox
RASSF7	B23	0.684722	AFOS	CTRL	dox
RELB	B23	-0.963608	AFOS	CTRL	dox
RHBDF2	B23	-0.167926	AFOS	CTRL	dox
RHOD	B23	1.12286	AFOS	CTRL	dox
RHOF	B23	-0.364924	AFOS	CTRL	dox
RIPK4	B23	-0.692863	AFOS	CTRL	dox
RPS6KA4	B23	-0.202848	AFOS	CTRL	dox
S100A14	B23	-0.494696	AFOS	CTRL	dox
S100A2	B23	-0.411171	AFOS	CTRL	dox
SCEL	B23	-0.411888	AFOS	CTRL	dox
SCNN1A	B23	-0.857438	AFOS	CTRL	dox
SDC4	B23	0.943705	AFOS	CTRL	dox
SEMA3F	B23	-1.27255	AFOS	CTRL	dox
SFN	B23	-0.439978	AFOS	CTRL	dox
SH2D3A	B23	0.807243	AFOS	CTRL	dox
SH3BP1	B23	0.160394	AFOS	CTRL	dox
SHC1	B23	-0.857906	AFOS	CTRL	dox
SLC10A3	B23	-0.0727265	AFOS	CTRL	dox
SLC12A4	B23	-0.822176	AFOS	CTRL	dox
SLC35F2	B23	-0.856424	AFOS	CTRL	dox
SLPI	B23	-0.835355	AFOS	CTRL	dox
SMAGP	B23	-0.421391	AFOS	CTRL	dox
SOX15	B23	-0.791219	AFOS	CTRL	dox
SPINT1	B23	0.13383	AFOS	CTRL	dox
SSH3	B23	-0.147175	AFOS	CTRL	dox
ST14	B23	-0.75994	AFOS	CTRL	dox
STXBP2	B23	0.464675	AFOS	CTRL	dox
TACSTD2	B23	-0.0998921	AFOS	CTRL	dox
TAPBP	B23	-0.336495	AFOS	CTRL	dox
TBC1D2	B23	-1.04752	AFOS	CTRL	dox
TFCP2L1	B23	-0.670448	AFOS	CTRL	dox
TGFA	B23	-0.381283	AFOS	CTRL	dox
THBD	B23	1.64625	AFOS	CTRL	dox
TJP1	B23	-0.736056	AFOS	CTRL	dox
TMEM40	B23	-0.542137	AFOS	CTRL	dox
TMPRSS4	B23	-0.497517	AFOS	CTRL	dox
TNFRSF10B	B23	0.803355	AFOS	CTRL	dox
TNFRSF21	B23	-0.981845	AFOS	CTRL	dox
TNFSF9	B23	-0.743886	AFOS	CTRL	dox
TNK1	B23	-0.526243	AFOS	CTRL	dox
TSPAN1	B23	-0.645753	AFOS	CTRL	dox
TUFT1	B23	-0.877727	AFOS	CTRL	dox
XYLT2	B23	0.371617	AFOS	CTRL	dox
ZBED2	B23	-0.523759	AFOS	CTRL	dox
ZFYVE21	B23	0.545985	AFOS	CTRL	dox
A4GALT	B25	0.0963033	AFOS	BRG1	veh
ADAM15	B25	1.21345	AFOS	BRG1	veh
ADM	B25	2.08613	AFOS	BRG1	veh
ALS2CL	B25	0.292775	AFOS	BRG1	veh
ANGPTL4	B25	1.40057	AFOS	BRG1	veh
AP1M2	B25	-0.11014	AFOS	BRG1	veh
AP1S1	B25	0.684435	AFOS	BRG1	veh
APOBEC3C	B25	1.6836	AFOS	BRG1	veh
ARHGEF18	B25	1.67609	AFOS	BRG1	veh
AXIN1	B25	1.86709	AFOS	BRG1	veh
B3GNT3	B25	2.47487	AFOS	BRG1	veh
BIK	B25	1.07946	AFOS	BRG1	veh
BTG2	B25	1.93441	AFOS	BRG1	veh
C1orf116	B25	2.2048	AFOS	BRG1	veh
CD44	B25	2.3202	AFOS	BRG1	veh
CDC42EP2	B25	1.57872	AFOS	BRG1	veh
CDH1	B25	1.15131	AFOS	BRG1	veh
CELSR1	B25	-0.254481	AFOS	BRG1	veh
CHAC1	B25	0.969633	AFOS	BRG1	veh
CLDN4	B25	2.21931	AFOS	BRG1	veh
CNKSR1	B25	1.27287	AFOS	BRG1	veh
CORO2A	B25	-0.675929	AFOS	BRG1	veh
DAPP1	B25	0.574653	AFOS	BRG1	veh
DFNA5	B25	-1.33005	AFOS	BRG1	veh
DOK4	B25	-0.919698	AFOS	BRG1	veh
DSC2	B25	0.662647	AFOS	BRG1	veh
DSG3	B25	2.23587	AFOS	BRG1	veh
DSP	B25	2.28191	AFOS	BRG1	veh
EFNA1	B25	1.96852	AFOS	BRG1	veh
EFNB1	B25	1.64437	AFOS	BRG1	veh
EGFR	B25	2.18054	AFOS	BRG1	veh
EHF	B25	1.74215	AFOS	BRG1	veh
ELF3	B25	2.02456	AFOS	BRG1	veh
EPCAM	B25	0.385649	AFOS	BRG1	veh
EPPK1	B25	1.19411	AFOS	BRG1	veh
EPS8L1	B25	-1.31263	AFOS	BRG1	veh
ETHE1	B25	0.876446	AFOS	BRG1	veh
EVPL	B25	-0.0233234	AFOS	BRG1	veh
EXT2	B25	-1.39745	AFOS	BRG1	veh
F3	B25	1.72035	AFOS	BRG1	veh
FBXL18	B25	1.03155	AFOS	BRG1	veh
FERMT1	B25	1.06793	AFOS	BRG1	veh
FGD6	B25	0.344392	AFOS	BRG1	veh
FGFBP1	B25	2.22502	AFOS	BRG1	veh
FLNB	B25	1.29654	AFOS	BRG1	veh
FST	B25	1.69197	AFOS	BRG1	veh
G0S2	B25	0.0962474	AFOS	BRG1	veh
GJB3	B25	-0.269636	AFOS	BRG1	veh
GJB5	B25	0.315542	AFOS	BRG1	veh
GLTP	B25	0.044259	AFOS	BRG1	veh
GRB7	B25	1.37796	AFOS	BRG1	veh
HBEGF	B25	1.09347	AFOS	BRG1	veh
HES2	B25	0.825668	AFOS	BRG1	veh
HMGA2	B25	-1.68999	AFOS	BRG1	veh
IER3	B25	0.917611	AFOS	BRG1	veh
IRF6	B25	1.94068	AFOS	BRG1	veh
ITGB4	B25	-0.713115	AFOS	BRG1	veh
ITGB6	B25	1.78722	AFOS	BRG1	veh
JUP	B25	-1.10265	AFOS	BRG1	veh
KRT1	B25	-0.353553	AFOS	BRG1	veh
KRT10	B25	0.273797	AFOS	BRG1	veh
KRT13	B25	2.42758	AFOS	BRG1	veh
KRT14	B25	2.31206	AFOS	BRG1	veh
KRT15	B25	2.34017	AFOS	BRG1	veh
KRT16	B25	2.41322	AFOS	BRG1	veh
KRT17	B25	2.28238	AFOS	BRG1	veh
KRT18	B25	2.19957	AFOS	BRG1	veh
KRT19	B25	1.68218	AFOS	BRG1	veh
KRT2	B25	-0.501787	AFOS	BRG1	veh
KRT20	B25	-0.538244	AFOS	BRG1	veh
KRT4	B25	1.21323	AFOS	BRG1	veh
KRT5	B25	2.04602	AFOS	BRG1	veh
KRT6A	B25	2.25985	AFOS	BRG1	veh
KRT6B	B25	-0.353553	AFOS	BRG1	veh
KRT6C	B25	2.47487	AFOS	BRG1	veh
KRT7	B25	2.09054	AFOS	BRG1	veh
KRT71	B25	1.20237	AFOS	BRG1	veh
KRT74	B25	2.47487	AFOS	BRG1	veh
KRT75	B25	2.32198	AFOS	BRG1	veh
KRT77	B25	2.47487	AFOS	BRG1	veh
KRT78	B25	-0.398409	AFOS	BRG1	veh
KRT79	B25	2.21251	AFOS	BRG1	veh
KRT8	B25	0.68425	AFOS	BRG1	veh
KRT80	B25	1.93146	AFOS	BRG1	veh
KRT9	B25	-0.539459	AFOS	BRG1	veh
LAD1	B25	1.9119	AFOS	BRG1	veh
LAMA3	B25	1.97015	AFOS	BRG1	veh
LAMA5	B25	0.826636	AFOS	BRG1	veh
LAMB3	B25	2.32164	AFOS	BRG1	veh
LIMK2	B25	1.18565	AFOS	BRG1	veh
LLGL2	B25	-0.0163387	AFOS	BRG1	veh
LRRC8E	B25	0.632301	AFOS	BRG1	veh
LSR	B25	-0.674736	AFOS	BRG1	veh
MPZL2	B25	-0.158183	AFOS	BRG1	veh
MST1R	B25	2.22908	AFOS	BRG1	veh
NQO1	B25	1.1426	AFOS	BRG1	veh
NR2F6	B25	-1.11429	AFOS	BRG1	veh
OCLN	B25	-1.88002	AFOS	BRG1	veh
PCDH1	B25	0.930301	AFOS	BRG1	veh
PDGFB	B25	0.766429	AFOS	BRG1	veh
PDLIM1	B25	1.8343	AFOS	BRG1	veh
PI3	B25	1.97476	AFOS	BRG1	veh
PIP4K2C	B25	-0.182738	AFOS	BRG1	veh
PLAGL2	B25	0.260197	AFOS	BRG1	veh
PORCN	B25	0.202163	AFOS	BRG1	veh
PPL	B25	0.795729	AFOS	BRG1	veh
PPP1R13L	B25	-0.293478	AFOS	BRG1	veh
PRRG2	B25	1.59789	AFOS	BRG1	veh
PRSS8	B25	1.62661	AFOS	BRG1	veh
PTGES	B25	1.99886	AFOS	BRG1	veh
RAB11FIP1	B25	1.14855	AFOS	BRG1	veh
RAB25	B25	0.407225	AFOS	BRG1	veh
RAB3D	B25	-0.326328	AFOS	BRG1	veh
RAP1GAP2	B25	0.47519	AFOS	BRG1	veh
RASSF7	B25	-0.618843	AFOS	BRG1	veh
RELB	B25	0.845033	AFOS	BRG1	veh
RHBDF2	B25	1.27969	AFOS	BRG1	veh
RHOD	B25	1.37659	AFOS	BRG1	veh
RHOF	B25	0.561969	AFOS	BRG1	veh
RIPK4	B25	1.95802	AFOS	BRG1	veh
RPS6KA4	B25	0.199508	AFOS	BRG1	veh
S100A14	B25	2.30555	AFOS	BRG1	veh
S100A2	B25	2.20685	AFOS	BRG1	veh
SCEL	B25	0.962686	AFOS	BRG1	veh
SCNN1A	B25	1.09963	AFOS	BRG1	veh
SDC4	B25	1.88249	AFOS	BRG1	veh
SEMA3F	B25	1.03274	AFOS	BRG1	veh
SFN	B25	2.29993	AFOS	BRG1	veh
SH2D3A	B25	-0.84137	AFOS	BRG1	veh
SH3BP1	B25	-0.653898	AFOS	BRG1	veh
SHC1	B25	1.00568	AFOS	BRG1	veh
SLC10A3	B25	1.78226	AFOS	BRG1	veh
SLC12A4	B25	1.5304	AFOS	BRG1	veh
SLC35F2	B25	0.64725	AFOS	BRG1	veh
SLPI	B25	1.72466	AFOS	BRG1	veh
SMAGP	B25	1.44998	AFOS	BRG1	veh
SOX15	B25	1.09199	AFOS	BRG1	veh
SPINT1	B25	2.00154	AFOS	BRG1	veh
SSH3	B25	-0.546899	AFOS	BRG1	veh
ST14	B25	-0.468426	AFOS	BRG1	veh
STXBP2	B25	-0.319615	AFOS	BRG1	veh
TACSTD2	B25	2.14383	AFOS	BRG1	veh
TAPBP	B25	0.638918	AFOS	BRG1	veh
TBC1D2	B25	2.08133	AFOS	BRG1	veh
TFCP2L1	B25	0.385547	AFOS	BRG1	veh
TGFA	B25	1.91933	AFOS	BRG1	veh
THBD	B25	1.20685	AFOS	BRG1	veh
TJP1	B25	0.631927	AFOS	BRG1	veh
TMEM40	B25	2.32854	AFOS	BRG1	veh
TMPRSS4	B25	2.39948	AFOS	BRG1	veh
TNFRSF10B	B25	0.135158	AFOS	BRG1	veh
TNFRSF21	B25	1.70953	AFOS	BRG1	veh
TNFSF9	B25	2.15977	AFOS	BRG1	veh
TNK1	B25	-0.849118	AFOS	BRG1	veh
TSPAN1	B25	2.12876	AFOS	BRG1	veh
TUFT1	B25	2.01809	AFOS	BRG1	veh
XYLT2	B25	1.91486	AFOS	BRG1	veh
ZBED2	B25	1.11507	AFOS	BRG1	veh
ZFYVE21	B25	2.13498	AFOS	BRG1	veh
A4GALT	B26	-0.719105	AFOS	BRG1	dox
ADAM15	B26	-1.0687	AFOS	BRG1	dox
ADM	B26	0.522148	AFOS	BRG1	dox
ALS2CL	B26	-1.19458	AFOS	BRG1	dox
ANGPTL4	B26	1.4504	AFOS	BRG1	dox
AP1M2	B26	-2.16486	AFOS	BRG1	dox
AP1S1	B26	-0.606965	AFOS	BRG1	dox
APOBEC3C	B26	0.177289	AFOS	BRG1	dox
ARHGEF18	B26	1.13887	AFOS	BRG1	dox
AXIN1	B26	-0.0691816	AFOS	BRG1	dox
B3GNT3	B26	-0.353553	AFOS	BRG1	dox
BIK	B26	-1.21889	AFOS	BRG1	dox
BTG2	B26	0.65395	AFOS	BRG1	dox
C1orf116	B26	0.591311	AFOS	BRG1	dox
CD44	B26	-0.43226	AFOS	BRG1	dox
CDC42EP2	B26	-0.760066	AFOS	BRG1	dox
CDH1	B26	1.71787	AFOS	BRG1	dox
CELSR1	B26	-1.36037	AFOS	BRG1	dox
CHAC1	B26	2.00095	AFOS	BRG1	dox
CLDN4	B26	-0.388075	AFOS	BRG1	dox
CNKSR1	B26	0.542164	AFOS	BRG1	dox
CORO2A	B26	-0.389382	AFOS	BRG1	dox
DAPP1	B26	2.01763	AFOS	BRG1	dox
DFNA5	B26	-1.1354	AFOS	BRG1	dox
DOK4	B26	0.505544	AFOS	BRG1	dox
DSC2	B26	-0.372186	AFOS	BRG1	dox
DSG3	B26	-0.146423	AFOS	BRG1	dox
DSP	B26	0.207938	AFOS	BRG1	dox
EFNA1	B26	0.4408	AFOS	BRG1	dox
EFNB1	B26	0.501857	AFOS	BRG1	dox
EGFR	B26	0.297222	AFOS	BRG1	dox
EHF	B26	0.399259	AFOS	BRG1	dox
ELF3	B26	0.118849	AFOS	BRG1	dox
EPCAM	B26	-0.71281	AFOS	BRG1	dox
EPPK1	B26	0.718033	AFOS	BRG1	dox
EPS8L1	B26	-0.448128	AFOS	BRG1	dox
ETHE1	B26	-1.16246	AFOS	BRG1	dox
EVPL	B26	-0.524873	AFOS	BRG1	dox
EXT2	B26	1.47606	AFOS	BRG1	dox
F3	B26	0.981006	AFOS	BRG1	dox
FBXL18	B26	-0.421736	AFOS	BRG1	dox
FERMT1	B26	1.61983	AFOS	BRG1	dox
FGD6	B26	0.463968	AFOS	BRG1	dox
FGFBP1	B26	0.651169	AFOS	BRG1	dox
FLNB	B26	0.443528	AFOS	BRG1	dox
FST	B26	0.112419	AFOS	BRG1	dox
G0S2	B26	0.69744	AFOS	BRG1	dox
GJB3	B26	-0.314432	AFOS	BRG1	dox
GJB5	B26	-0.0893356	AFOS	BRG1	dox
GLTP	B26	0.563539	AFOS	BRG1	dox
GRB7	B26	1.07714	AFOS	BRG1	dox
HBEGF	B26	1.04653	AFOS	BRG1	dox
HES2	B26	-1.69493	AFOS	BRG1	dox
HMGA2	B26	-1.11301	AFOS	BRG1	dox
IER3	B26	1.23721	AFOS	BRG1	dox
IRF6	B26	-0.319474	AFOS	BRG1	dox
ITGB4	B26	0.288755	AFOS	BRG1	dox
ITGB6	B26	1.02297	AFOS	BRG1	dox
JUP	B26	-1.55556	AFOS	BRG1	dox
KRT1	B26	2.47487	AFOS	BRG1	dox
KRT10	B26	1.11556	AFOS	BRG1	dox
KRT13	B26	-0.364181	AFOS	BRG1	dox
KRT14	B26	-0.404819	AFOS	BRG1	dox
KRT15	B26	-0.423741	AFOS	BRG1	dox
KRT16	B26	-0.437366	AFOS	BRG1	dox
KRT17	B26	-0.450259	AFOS	BRG1	dox
KRT18	B26	0.422966	AFOS	BRG1	dox
KRT19	B26	1.37476	AFOS	BRG1	dox
KRT2	B26	0.813607	AFOS	BRG1	dox
KRT20	B26	-0.538244	AFOS	BRG1	dox
KRT4	B26	1.67827	AFOS	BRG1	dox
KRT5	B26	0.235023	AFOS	BRG1	dox
KRT6A	B26	-0.45395	AFOS	BRG1	dox
KRT6B	B26	-0.353553	AFOS	BRG1	dox
KRT6C	B26	-0.353553	AFOS	BRG1	dox
KRT7	B26	-0.370751	AFOS	BRG1	dox
KRT71	B26	-0.317784	AFOS	BRG1	dox
KRT74	B26	-0.353553	AFOS	BRG1	dox
KRT75	B26	-0.472979	AFOS	BRG1	dox
KRT77	B26	-0.353553	AFOS	BRG1	dox
KRT78	B26	1.20126	AFOS	BRG1	dox
KRT79	B26	0.603498	AFOS	BRG1	dox
KRT8	B26	2.00998	AFOS	BRG1	dox
KRT80	B26	-0.474998	AFOS	BRG1	dox
KRT9	B26	-0.539459	AFOS	BRG1	dox
LAD1	B26	1.02933	AFOS	BRG1	dox
LAMA3	B26	0.143684	AFOS	BRG1	dox
LAMA5	B26	-1.11627	AFOS	BRG1	dox
LAMB3	B26	-0.391494	AFOS	BRG1	dox
LIMK2	B26	-0.183242	AFOS	BRG1	dox
LLGL2	B26	-1.62859	AFOS	BRG1	dox
LRRC8E	B26	-0.64677	AFOS	BRG1	dox
LSR	B26	-0.977056	AFOS	BRG1	dox
MPZL2	B26	2.17355	AFOS	BRG1	dox
MST1R	B26	-0.168576	AFOS	BRG1	dox
NQO1	B26	1.43011	AFOS	BRG1	dox
NR2F6	B26	-0.0969907	AFOS	BRG1	dox
OCLN	B26	0.314033	AFOS	BRG1	dox
PCDH1	B26	1.15348	AFOS	BRG1	dox
PDGFB	B26	-0.287314	AFOS	BRG1	dox
PDLIM1	B26	-0.0314532	AFOS	BRG1	dox
PI3	B26	-0.127097	AFOS	BRG1	dox
PIP4K2C	B26	0.724348	AFOS	BRG1	dox
PLAGL2	B26	0.877873	AFOS	BRG1	dox
PORCN	B26	-2.21379	AFOS	BRG1	dox
PPL	B26	-1.08248	AFOS	BRG1	dox
PPP1R13L	B26	-1.76482	AFOS	BRG1	dox
PRRG2	B26	1.20352	AFOS	BRG1	dox
PRSS8	B26	-0.506179	AFOS	BRG1	dox
PTGES	B26	-0.43693	AFOS	BRG1	dox
RAB11FIP1	B26	-0.0918875	AFOS	BRG1	dox
RAB25	B26	-0.748761	AFOS	BRG1	dox
RAB3D	B26	-0.925538	AFOS	BRG1	dox
RAP1GAP2	B26	-0.951909	AFOS	BRG1	dox
RASSF7	B26	-1.23621	AFOS	BRG1	dox
RELB	B26	-0.261021	AFOS	BRG1	dox
RHBDF2	B26	-1.29753	AFOS	BRG1	dox
RHOD	B26	1.11177	AFOS	BRG1	dox
RHOF	B26	-1.53602	AFOS	BRG1	dox
RIPK4	B26	0.746146	AFOS	BRG1	dox
RPS6KA4	B26	-1.28471	AFOS	BRG1	dox
S100A14	B26	-0.416112	AFOS	BRG1	dox
S100A2	B26	-0.100701	AFOS	BRG1	dox
SCEL	B26	-0.845916	AFOS	BRG1	dox
SCNN1A	B26	1.58288	AFOS	BRG1	dox
SDC4	B26	0.330787	AFOS	BRG1	dox
SEMA3F	B26	-0.475591	AFOS	BRG1	dox
SFN	B26	-0.51176	AFOS	BRG1	dox
SH2D3A	B26	-0.325839	AFOS	BRG1	dox
SH3BP1	B26	-0.92401	AFOS	BRG1	dox
SHC1	B26	1.14289	AFOS	BRG1	dox
SLC10A3	B26	0.225672	AFOS	BRG1	dox
SLC12A4	B26	-1.19798	AFOS	BRG1	dox
SLC35F2	B26	0.140437	AFOS	BRG1	dox
SLPI	B26	0.45522	AFOS	BRG1	dox
SMAGP	B26	1.21616	AFOS	BRG1	dox
SOX15	B26	1.68045	AFOS	BRG1	dox
SPINT1	B26	0.432644	AFOS	BRG1	dox
SSH3	B26	-1.95439	AFOS	BRG1	dox
ST14	B26	2.04211	AFOS	BRG1	dox
STXBP2	B26	-1.55084	AFOS	BRG1	dox
TACSTD2	B26	0.848782	AFOS	BRG1	dox
TAPBP	B26	-0.803874	AFOS	BRG1	dox
TBC1D2	B26	-0.0360723	AFOS	BRG1	dox
TFCP2L1	B26	-0.415659	AFOS	BRG1	dox
TGFA	B26	-0.121882	AFOS	BRG1	dox
THBD	B26	0.633789	AFOS	BRG1	dox
TJP1	B26	-0.378134	AFOS	BRG1	dox
TMEM40	B26	-0.086053	AFOS	BRG1	dox
TMPRSS4	B26	-0.497517	AFOS	BRG1	dox
TNFRSF10B	B26	-0.462369	AFOS	BRG1	dox
TNFRSF21	B26	0.388834	AFOS	BRG1	dox
TNFSF9	B26	0.199878	AFOS	BRG1	dox
TNK1	B26	0.0993767	AFOS	BRG1	dox
TSPAN1	B26	0.0967426	AFOS	BRG1	dox
TUFT1	B26	-0.179257	AFOS	BRG1	dox
XYLT2	B26	0.896985	AFOS	BRG1	dox
ZBED2	B26	-0.523759	AFOS	BRG1	dox
ZFYVE21	B26	-0.153885	AFOS	BRG1	dox
