# Supplementary material for: Re-expression of SMARCA4/BRG1 in small cell carcinoma of ovary, hypercalcemic type (SCCOHT) promotes an epithelial-like gene signature through an AP-1-dependent mechanism
Source: eLife. 2020 Dec 23;9:e59073. doi: 10.7554/eLife.59073 (PMC7813545; doi:10.7554/eLife.59073)
Supplement: Supplementary file 1. — A, Table of DESeq2 results for RNA-seq BIN67 +/- BRG1 samples. Log2FoldChange = BIN67/Control. B, Table of PECA analysis results for proteomics BIN67 +/- BRG1. [file elife-59073-supp1.xlsx]

## Sheet: README
Supplemental Table 1 | RNA-seq and Proteomics differential expression results for BIN67 +/- BRG1 re-expression.
Sheet A	RNA-seq differential expression results from DESeq2 for BIN67 +/- BRG1. Log2FoldChange = BRG1/Control
Sheet B	Proteomics differential expression results from PECA analysis for BIN67 +/- BRG1. Log2FoldChange = BRG1/Control

## Sheet: A. RNA-seq
baseMean	log2FoldChange	lfcSE	stat	pvalue	padj	Gene	Significance
691.422	-0.636497	0.216279	-2.94294	0.00325107	0.00958874	A1BG	padj<0.05 & Downregulated
4.88097	-0.02678	0.8501	-0.0315021	0.974869	0.984584	A1CF	N.S.
42.7744	0.516563	0.533717	0.96786	0.333114	0.462487	A2M	N.S.
195.436	-1.86409	0.365222	-5.10399	3.32561e-07	2.06368e-06	A2ML1	padj<0.05 & Downregulated
0.115843	0.776761	3.53381	0.219808	0.826021	NA	A3GALT2	N.S.
2066.41	0.11549	0.137891	0.83755	0.402283	0.531191	A4GALT	N.S.
1.9748	-0.336079	1.18141	-0.284474	0.776047	0.848158	A4GNT	N.S.
2999.26	-0.296394	0.118704	-2.49691	0.012528	0.0314029	AAAS	padj<0.05 & Downregulated
3861.16	0.109844	0.0916982	1.19789	0.230961	0.348894	AACS	N.S.
28.3064	8.29014	1.1236	7.37821	1.60431e-13	1.93528e-12	AADAC	padj<0.05 & Upregulated
0	NA	NA	NA	NA	NA	AADACL2	N.S.
20.3799	7.07653	1.22719	5.76647	8.09478e-09	6.2186e-08	AADACL3	padj<0.05 & Upregulated
0	NA	NA	NA	NA	NA	AADACL4	N.S.
832.38	0.0404345	0.0988281	0.40914	0.682437	0.776067	AADAT	N.S.
1849.73	-0.227139	0.111363	-2.03962	0.0413877	0.0865646	AAED1	N.S.
6529.75	0.0295483	0.105422	0.280285	0.779259	0.850495	AAGAB	N.S.
4602.38	0.511294	0.115031	4.44484	8.79572e-06	4.41966e-05	AAK1	padj<0.05 & Upregulated
1095.4	0.141144	0.142968	0.987238	0.323526	0.452236	AAMDC	N.S.
9302.75	0.24091	0.10084	2.38903	0.016893	0.0404646	AAMP	padj<0.05 & Upregulated
12.5738	0.531239	0.618655	0.8587	0.390506	0.520247	AANAT	N.S.
2344.25	-0.0186914	0.0792022	-0.235995	0.813436	0.8746	AAR2	N.S.
2.77485	-0.721337	1.02247	-0.705486	0.480508	0.604528	AARD	N.S.
7769.16	0.176686	0.162231	1.0891	0.27611	0.401072	AARS	N.S.
1451.54	-0.32553	0.117604	-2.76801	0.00563995	0.0156544	AARS2	padj<0.05 & Downregulated
2270.7	-0.224229	0.0927648	-2.41718	0.0156414	0.0378938	AARSD1	padj<0.05 & Downregulated
977.316	-0.0223887	0.110789	-0.202085	0.839851	0.89352	AASDH	N.S.
4791.7	-0.27554	0.132606	-2.07789	0.0377199	0.0800183	AASDHPPT	N.S.
39.359	-0.180119	0.31186	-0.577565	0.563558	0.678082	AASS	N.S.
7998.98	0.283654	0.0869537	3.26213	0.00110579	0.00367002	AATF	padj<0.05 & Upregulated
1088.47	-0.488088	0.240394	-2.03037	0.0423188	0.0883002	AATK	N.S.
1084.7	1.48654	0.159015	9.34846	8.89325e-21	1.70537e-19	ABAT	padj<0.05 & Upregulated
56.6896	0.16256	0.435289	0.373454	0.708811	0.796036	ABC7-42404400C24.1	N.S.
639.732	5.49145	0.384745	14.273	3.22514e-46	1.61544e-44	ABCA1	padj<0.05 & Upregulated
11.5851	1.89663	0.953228	1.98969	0.0466248	0.0957828	ABCA10	N.S.
51.7131	6.20536	0.731398	8.48424	2.1714e-17	3.40375e-16	ABCA12	padj<0.05 & Upregulated
30.3254	3.23187	0.99257	3.25607	0.00112967	0.00374503	ABCA13	padj<0.05 & Upregulated
6623.94	-0.170109	0.145083	-1.1725	0.240997	0.360771	ABCA2	N.S.
12306.1	-0.373447	0.147151	-2.53785	0.0111536	0.0284472	ABCA3	padj<0.05 & Downregulated
325.936	4.82778	0.644855	7.4866	7.06806e-14	8.84446e-13	ABCA4	padj<0.05 & Upregulated
550.717	0.590756	0.26133	2.26057	0.0237859	0.0542685	ABCA5	N.S.
0.737388	1.01836	2.88117	0.353452	0.723749	0.808448	ABCA6	N.S.
1636.9	0.571993	0.240003	2.38328	0.0171593	0.0410124	ABCA7	padj<0.05 & Upregulated
3.21271	3.25834	2.14599	1.51834	0.128928	0.220653	ABCA8	N.S.
0.594959	0.601761	3.01303	0.19972	0.8417	0.894625	ABCA9	N.S.
54.691	3.99467	0.665727	6.00046	1.96765e-09	1.62396e-08	ABCB1	padj<0.05 & Upregulated
3979.59	-0.655908	0.149774	-4.37931	1.19055e-05	5.85236e-05	ABCB10	padj<0.05 & Downregulated
1.53085	3.14522	2.0234	1.55442	0.120085	0.208589	ABCB11	N.S.
2.39824	3.61297	1.61644	2.23514	0.0254082	0.057451	ABCB4	N.S.
357.022	-1.33581	0.371535	-3.59539	0.000323906	0.00122393	ABCB5	padj<0.05 & Downregulated
413.128	1.46966	0.248026	5.92543	3.11488e-09	2.50556e-08	ABCB6	padj<0.05 & Upregulated
2164.18	-0.00211385	0.165339	-0.0127849	0.989799	0.99419	ABCB7	N.S.
1956.88	0.365823	0.107799	3.39357	0.000689891	0.00241336	ABCB8	padj<0.05 & Upregulated
1044.66	-0.605021	0.15676	-3.85955	0.000113597	0.000470784	ABCB9	padj<0.05 & Downregulated
8137.88	0.310693	0.0903018	3.44061	0.000580403	0.00207273	ABCC1	padj<0.05 & Upregulated
2119.03	0.00995708	0.11961	0.0832465	0.933656	0.957777	ABCC10	N.S.
22.9964	0.0216149	0.418024	0.0517074	0.958762	0.974244	ABCC11	N.S.
0.77135	3.09353	2.22251	1.39191	0.163951	0.267211	ABCC12	N.S.
169.393	3.48665	0.386342	9.02477	1.8007e-19	3.20941e-18	ABCC2	padj<0.05 & Upregulated
150.568	0.673708	0.286319	2.353	0.0186225	0.043967	ABCC3	padj<0.05 & Upregulated
3251.18	-0.597478	0.175867	-3.39734	0.000680448	0.0023841	ABCC4	padj<0.05 & Downregulated
4819.83	-0.13993	0.145899	-0.959089	0.337514	0.46718	ABCC5	N.S.
39.5466	0.350694	0.383677	0.914035	0.360698	0.491121	ABCC6	N.S.
291.387	-0.0669783	0.38872	-0.172305	0.863198	0.909916	ABCC8	N.S.
5.02233	1.53706	0.870249	1.76623	0.077357	0.145979	ABCC9	N.S.
3322.38	-0.123761	0.173814	-0.712033	0.476444	0.60089	ABCD1	N.S.
62.4362	-3.26086	0.573201	-5.68885	1.27899e-08	9.60951e-08	ABCD2	padj<0.05 & Downregulated
5490.59	0.052781	0.142584	0.370174	0.711253	0.798111	ABCD3	N.S.
3359.01	0.323329	0.12128	2.66597	0.00767673	0.0205329	ABCD4	padj<0.05 & Upregulated
10387.4	-0.493816	0.131276	-3.76166	0.000168787	0.000677128	ABCE1	padj<0.05 & Downregulated
12110.8	-0.0182326	0.075	-0.243101	0.807927	0.871148	ABCF1	N.S.
8292.23	-0.160619	0.0778859	-2.06224	0.0391851	0.0826719	ABCF2	N.S.
6087.76	0.250917	0.11416	2.19795	0.0279527	0.0622198	ABCF3	N.S.
634.434	1.79858	0.326332	5.51151	3.55763e-08	2.51065e-07	ABCG1	padj<0.05 & Upregulated
31.532	-0.498862	0.343401	-1.45271	0.146304	0.243956	ABCG2	N.S.
378.666	-1.13502	0.314265	-3.61167	0.000304236	0.00115764	ABCG4	padj<0.05 & Downregulated
5.01919	-0.5124	0.771592	-0.664081	0.506638	0.627975	ABCG5	N.S.
0.846909	0.383049	1.82331	0.210085	0.833601	0.888988	ABCG8	N.S.
58.9062	-0.775747	0.252197	-3.07596	0.00209829	0.00651619	ABHD1	padj<0.05 & Downregulated
1953.3	-0.382063	0.174456	-2.19002	0.0285227	0.0632705	ABHD10	N.S.
3006.37	-0.00746032	0.195089	-0.0382406	0.969496	0.981147	ABHD11	N.S.
5483.76	0.265177	0.150232	1.76512	0.0775441	0.146253	ABHD12	N.S.
32.5447	-0.411666	0.395454	-1.041	0.297878	0.425465	ABHD12B	N.S.
2187.12	-0.0946782	0.0955811	-0.990554	0.321904	0.450655	ABHD13	N.S.
1206.27	-0.378926	0.102117	-3.71069	0.000206693	0.000815498	ABHD14A	padj<0.05 & Downregulated
63.7157	-0.199662	0.311821	-0.640309	0.521972	0.641838	ABHD14A-ACY1	N.S.
4994.5	-0.112302	0.163486	-0.686918	0.492134	0.614894	ABHD14B	N.S.
3633.75	-0.47065	0.186272	-2.52668	0.0115145	0.029211	ABHD15	padj<0.05 & Downregulated
2487.26	0.554598	0.113646	4.88005	1.06057e-06	6.10528e-06	ABHD16A	padj<0.05 & Upregulated
47.148	0.423987	1.8362	0.230904	0.817389	0.877064	ABHD16B	N.S.
7846.17	-0.0405136	0.13915	-0.291152	0.770935	0.843894	ABHD17A	N.S.
1872.92	-0.268039	0.0993286	-2.6985	0.00696518	0.0188622	ABHD17B	padj<0.05 & Downregulated
1295.78	0.0573813	0.159573	0.359592	0.719152	0.805005	ABHD17C	N.S.
835.278	0.000350916	0.124735	0.00281329	0.997755	0.998787	ABHD18	N.S.
3319.3	0.216298	0.133629	1.61864	0.105524	0.188326	ABHD2	N.S.
2141.05	-0.028592	0.203442	-0.140541	0.888233	0.927002	ABHD3	N.S.
470.586	1.55032	0.263745	5.8781	4.15006e-09	3.28967e-08	ABHD4	padj<0.05 & Upregulated
1324.76	0.442497	0.207239	2.1352	0.0327447	0.0709828	ABHD5	N.S.
1220.51	-0.691283	0.0920416	-7.51055	5.88804e-14	7.44808e-13	ABHD6	padj<0.05 & Downregulated
1664.27	0.0420847	0.262834	0.160119	0.872787	0.916254	ABHD8	N.S.
5934.09	0.163311	0.107958	1.51272	0.130351	0.222584	ABI1	N.S.
8059.63	-0.719179	0.104819	-6.86114	6.83119e-12	7.2079e-11	ABI2	padj<0.05 & Downregulated
5.99377	0.347871	1.02401	0.339715	0.734071	0.816046	ABI3	N.S.
81.1264	-0.718715	0.336478	-2.13599	0.0326801	0.0708604	ABI3BP	N.S.
6447.71	0.0995345	0.0922233	1.07928	0.280464	0.406247	ABL1	N.S.
5136.31	1.31678	0.122544	10.7454	6.23161e-27	1.60923e-25	ABL2	padj<0.05 & Upregulated
6077.8	2.3435	0.329014	7.1228	1.05758e-12	1.19473e-11	ABLIM1	padj<0.05 & Upregulated
612.657	0.8484	0.156013	5.43801	5.38798e-08	3.71511e-07	ABLIM2	padj<0.05 & Upregulated
148.645	3.69946	0.381403	9.69961	3.0264e-22	6.21419e-21	ABLIM3	padj<0.05 & Upregulated
0.238788	0.0554624	3.53381	0.0156948	0.987478	NA	ABO	N.S.
5348.24	0.440606	0.115164	3.8259	0.000130295	0.000532765	ABR	padj<0.05 & Upregulated
5.78125	-0.258821	0.820918	-0.315283	0.752547	0.830073	ABRA	N.S.
7996.29	-0.987019	0.185848	-5.3109	1.09086e-07	7.18353e-07	ABRACL	padj<0.05 & Downregulated
3779.08	-0.468629	0.0772893	-6.06331	1.33349e-09	1.1229e-08	ABT1	padj<0.05 & Downregulated
1720.59	1.4034	0.227571	6.16686	6.96577e-10	6.04382e-09	ABTB1	padj<0.05 & Upregulated
1501.67	2.1017	0.159172	13.204	8.32401e-40	3.47119e-38	ABTB2	padj<0.05 & Upregulated
14.6289	0.461969	0.846755	0.545576	0.585358	0.697143	AC002310.11	N.S.
0	NA	NA	NA	NA	NA	AC002310.13	N.S.
376.915	0.455247	0.168024	2.70941	0.00674034	0.0183179	AC002398.9	padj<0.05 & Upregulated
9.13477	0.394682	0.688232	0.573473	0.566325	0.680566	AC002985.3	N.S.
0	NA	NA	NA	NA	NA	AC003002.4	N.S.
2.52998	0.913111	1.49053	0.612609	0.540135	0.65757	AC003002.6	N.S.
0.243669	0.0696953	3.53381	0.0197224	0.984265	NA	AC003005.4	N.S.
0	NA	NA	NA	NA	NA	AC003006.7	N.S.
0	NA	NA	NA	NA	NA	AC004076.7	N.S.
3.10522	1.17866	1.24541	0.9464	0.343945	0.474162	AC004076.9	N.S.
0.232342	0.0483901	3.53381	0.0136935	0.989075	NA	AC004158.1	N.S.
77.162	6.06059	1.14526	5.2919	1.21054e-07	7.92967e-07	AC004231.7	padj<0.05 & Upregulated
297.519	-0.790363	0.16228	-4.87037	1.11391e-06	6.38285e-06	AC004381.6	padj<0.05 & Downregulated
1.5561	-4.05584	2.19595	-1.84697	0.0647516	0.125913	AC004556.1	N.S.
43.8433	0.603556	0.271878	2.21995	0.0264222	0.0593588	AC004754.3	N.S.
0.490237	-2.38643	3.05896	-0.780144	0.435306	NA	AC004813.1	N.S.
0	NA	NA	NA	NA	NA	AC004824.2	N.S.
0	NA	NA	NA	NA	NA	AC004824.3	N.S.
0	NA	NA	NA	NA	NA	AC004853.1	N.S.
0	NA	NA	NA	NA	NA	AC004953.1	N.S.
0	NA	NA	NA	NA	NA	AC005042.1	N.S.
0.75985	3.07449	2.26843	1.35534	0.175309	0.281745	AC005477.1	N.S.
1.1115	1.02292	1.71252	0.597319	0.550294	0.66654	AC005480.1	N.S.
0.841431	3.23055	2.6108	1.23738	0.215945	0.332169	AC005779.2	N.S.
54.4997	-0.872238	3.2292	-0.27011	NA	NA	AC005943.2	N.S.
1.23343	-0.492726	1.64713	-0.299142	0.764831	0.83874	AC006026.2	N.S.
0	NA	NA	NA	NA	NA	AC006328.4	N.S.
0.606694	1.71652	2.96545	0.57884	0.562697	0.677514	AC006386.1	N.S.
0	NA	NA	NA	NA	NA	AC006445.1	N.S.
80.7738	0.274456	0.275218	0.99723	0.318653	0.447253	AC006449.1	N.S.
80.7738	0.274456	0.275218	0.99723	0.318653	0.447253	AC006449.2	N.S.
4.2144	1.92224	1.50936	1.27355	0.202823	0.316821	AC006486.9	N.S.
0	NA	NA	NA	NA	NA	AC006538.4	N.S.
0.123055	0.776761	3.53381	0.219808	0.826021	NA	AC006994.3	N.S.
106.521	-1.14127	0.356506	-3.20128	0.00136819	0.00444944	AC007040.11	padj<0.05 & Downregulated
0.362142	2.01526	3.48979	0.577473	0.56362	NA	AC007163.2	N.S.
133.711	-0.245104	0.562038	-0.436099	0.662765	0.759843	AC007192.4	N.S.
0	NA	NA	NA	NA	NA	AC007325.1	N.S.
1092.39	0.901273	0.251498	3.58362	0.000338869	0.0012722	AC007325.2	padj<0.05 & Upregulated
2190.4	-0.334947	0.178976	-1.87147	0.0612804	0.120304	AC007325.4	N.S.
1.73905	-4.21034	1.72145	-2.4458	0.0144529	0.035431	AC007326.1	padj<0.05 & Downregulated
0	NA	NA	NA	NA	NA	AC007557.5	N.S.
1.25777	1.14843	2.15633	0.532585	0.594321	0.704064	AC007906.1	N.S.
2.42996	0.337113	1.9325	0.174444	0.861516	0.908916	AC008074.1	N.S.
24.441	-2.35121	1.1218	-2.09592	0.0360889	0.077148	AC008522.1	N.S.
0	NA	NA	NA	NA	NA	AC008622.1	N.S.
0	NA	NA	NA	NA	NA	AC008641.1	N.S.
0	NA	NA	NA	NA	NA	AC008686.1	N.S.
0	NA	NA	NA	NA	NA	AC008759.1	N.S.
0	NA	NA	NA	NA	NA	AC008810.1	N.S.
0	NA	NA	NA	NA	NA	AC008914.1	N.S.
1.11623	-1.07402	1.95078	-0.550559	0.581936	0.694015	AC009022.1	N.S.
1.35308	-0.218503	1.61778	-0.135063	0.892562	0.929794	AC009060.2	N.S.
6.32844	-0.666557	0.735342	-0.906458	0.364693	0.494975	AC009060.3	N.S.
0.482064	-2.36466	3.46067	-0.683296	0.49442	NA	AC009065.4	N.S.
0	NA	NA	NA	NA	NA	AC009121.2	N.S.
64.2701	-1.42978	2.3601	-0.605814	0.544638	0.66162	AC009133.22	N.S.
6.90509	-2.45803	3.27132	-0.751386	NA	NA	AC009133.23	N.S.
8.59849	-0.266547	1.21522	-0.219342	0.826384	0.883742	AC009336.19	N.S.
0	NA	NA	NA	NA	NA	AC009491.1	N.S.
0	NA	NA	NA	NA	NA	AC009491.2	N.S.
0	NA	NA	NA	NA	NA	AC009758.1	N.S.
7.85452	-6.38901	3.38818	-1.88568	0.0593383	0.117217	AC009950.1	N.S.
0	NA	NA	NA	NA	NA	AC009977.1	N.S.
0	NA	NA	NA	NA	NA	AC010184.1	N.S.
0.52906	0.0599445	2.64081	0.0226993	0.98189	NA	AC010287.1	N.S.
1.19824	-0.607792	1.64726	-0.368971	0.71215	0.79886	AC010412.1	N.S.
58.2318	-0.393728	0.809478	-0.486398	0.626685	0.730637	AC010547.9	N.S.
103.107	-0.974052	0.208169	-4.67913	2.88088e-06	1.55711e-05	AC010642.1	padj<0.05 & Downregulated
0.248756	0.0557942	3.53381	0.0157887	0.987403	NA	AC010646.3	N.S.
0	NA	NA	NA	NA	NA	AC010655.1	N.S.
122.421	0.0635284	0.252516	0.251582	0.801364	0.866914	AC011043.1	N.S.
0.650897	-0.499416	2.20036	-0.22697	0.820447	0.879357	AC011043.2	N.S.
0	NA	NA	NA	NA	NA	AC011155.1	N.S.
0.698893	-2.90291	3.43679	-0.844657	0.398302	0.527569	AC011295.1	N.S.
0	NA	NA	NA	NA	NA	AC011380.1	N.S.
0.314094	-0.42064	3.53201	-0.119094	0.905201	NA	AC011513.3	N.S.
3.48789	-0.94261	1.31204	-0.718429	0.472493	0.596813	AC011530.4	N.S.
0.650897	-0.499416	2.20036	-0.22697	0.820447	0.879357	AC011841.1	N.S.
5.1818	-0.29464	0.912557	-0.322873	0.746791	0.82592	AC012005.3	N.S.
0	NA	NA	NA	NA	NA	AC012005.4	N.S.
7026.58	-0.354189	0.144838	-2.44542	0.0144684	0.035446	AC012314.2	padj<0.05 & Downregulated
7650.05	-0.363271	0.117206	-3.09941	0.00193905	0.00606409	AC012314.3	padj<0.05 & Downregulated
7025.86	-0.354023	0.144764	-2.44552	0.0144643	0.0354415	AC012314.5	padj<0.05 & Downregulated
7692.94	-0.388752	0.127213	-3.05591	0.00224375	0.00691983	AC012314.6	padj<0.05 & Downregulated
7449.56	-0.360266	0.113862	-3.16406	0.00155586	0.00499085	AC012314.7	padj<0.05 & Downregulated
7055.97	-0.340499	0.142444	-2.3904	0.0168299	0.0403247	AC012314.9	padj<0.05 & Downregulated
0	NA	NA	NA	NA	NA	AC012363.2	N.S.
0	NA	NA	NA	NA	NA	AC013269.5	N.S.
0	NA	NA	NA	NA	NA	AC013286.1	N.S.
3174.68	-0.493806	0.141245	-3.4961	0.000472115	0.00171518	AC013461.1	padj<0.05 & Downregulated
2.03461	0.277997	1.97695	0.140619	0.888171	0.927002	AC015688.3	N.S.
0.240716	1.4932	3.52645	0.42343	0.671982	NA	AC016142.1	N.S.
0.506465	2.4881	3.02824	0.821632	0.411287	NA	AC016549.1	N.S.
1.17344	3.6989	3.01704	1.226	0.220198	0.336961	AC016577.1	N.S.
0	NA	NA	NA	NA	NA	AC016734.1	N.S.
0	NA	NA	NA	NA	NA	AC016753.2	N.S.
0	NA	NA	NA	NA	NA	AC017028.10	N.S.
0.120516	-0.665912	3.53381	-0.18844	0.850532	NA	AC017081.1	N.S.
0	NA	NA	NA	NA	NA	AC018512.1	N.S.
0.489385	0.0104519	3.18589	0.0032807	0.997382	NA	AC018755.18	N.S.
0	NA	NA	NA	NA	NA	AC018867.1	N.S.
0	NA	NA	NA	NA	NA	AC018902.1	N.S.
0	NA	NA	NA	NA	NA	AC019206.1	N.S.
2.40568	0.245714	1.23906	0.198307	0.842805	0.895366	AC021106.1	N.S.
0.473328	-1.22215	3.15556	-0.3873	0.698534	NA	AC022016.1	N.S.
0	NA	NA	NA	NA	NA	AC022210.1	N.S.
1.19824	-0.607792	1.64726	-0.368971	0.71215	0.79886	AC022405.1	N.S.
0	NA	NA	NA	NA	NA	AC022819.2	N.S.
0	NA	NA	NA	NA	NA	AC023491.2	N.S.
0	NA	NA	NA	NA	NA	AC024060.1	N.S.
0	NA	NA	NA	NA	NA	AC024361.1	N.S.
157.175	0.462619	0.213025	2.17166	0.0298812	0.0658647	AC024592.12	N.S.
0	NA	NA	NA	NA	NA	AC025263.3	N.S.
2.14907	0.572426	1.368	0.418439	0.675626	0.770635	AC026248.1	N.S.
0.354623	-0.652812	3.42993	-0.190328	0.849052	NA	AC026369.1	N.S.
0	NA	NA	NA	NA	NA	AC026449.1	N.S.
28.8199	-0.307918	0.679838	-0.452929	0.6506	0.75009	AC037459.4	N.S.
0	NA	NA	NA	NA	NA	AC037482.2	N.S.
0	NA	NA	NA	NA	NA	AC044810.2	N.S.
0	NA	NA	NA	NA	NA	AC055733.1	N.S.
0	NA	NA	NA	NA	NA	AC055866.1	N.S.
0	NA	NA	NA	NA	NA	AC063956.1	N.S.
0	NA	NA	NA	NA	NA	AC063956.2	N.S.
0	NA	NA	NA	NA	NA	AC064829.1	N.S.
0	NA	NA	NA	NA	NA	AC066615.1	N.S.
35.7966	0.0373517	0.525006	0.0711453	0.943282	0.963795	AC068533.7	N.S.
0	NA	NA	NA	NA	NA	AC069063.1	N.S.
0.375302	-1.99757	3.48274	-0.573562	0.566264	NA	AC069063.2	N.S.
1.16946	2.34318	1.87872	1.24722	0.212316	0.327656	AC069368.3	N.S.
0	NA	NA	NA	NA	NA	AC069499.1	N.S.
0	NA	NA	NA	NA	NA	AC073072.1	N.S.
0	NA	NA	NA	NA	NA	AC073130.2	N.S.
0.123055	0.776761	3.53381	0.219808	0.826021	NA	AC073333.1	N.S.
0	NA	NA	NA	NA	NA	AC073610.5	N.S.
0.237615	-1.37606	3.53172	-0.389629	0.696811	NA	AC073657.1	N.S.
0	NA	NA	NA	NA	NA	AC074033.1	N.S.
0	NA	NA	NA	NA	NA	AC079355.1	N.S.
0	NA	NA	NA	NA	NA	AC079907.1	N.S.
3.32248	-5.14504	3.09104	-1.6645	0.0960127	0.174079	AC084219.2	N.S.
0	NA	NA	NA	NA	NA	AC087350.1	N.S.
0	NA	NA	NA	NA	NA	AC087392.1	N.S.
0	NA	NA	NA	NA	NA	AC087651.1	N.S.
0	NA	NA	NA	NA	NA	AC087651.2	N.S.
1.91871	3.58209	1.98995	1.80009	0.0718467	0.137305	AC087762.1	N.S.
0	NA	NA	NA	NA	NA	AC090154.1	N.S.
27120.7	-0.114541	0.148061	-0.773606	0.439164	0.566203	AC090498.1	N.S.
0	NA	NA	NA	NA	NA	AC090958.1	N.S.
0	NA	NA	NA	NA	NA	AC091180.1	N.S.
0	NA	NA	NA	NA	NA	AC091304.2	N.S.
0	NA	NA	NA	NA	NA	AC092159.1	N.S.
0	NA	NA	NA	NA	NA	AC092384.1	N.S.
0	NA	NA	NA	NA	NA	AC092718.1	N.S.
27.2481	-0.792774	0.589354	-1.34516	0.178574	0.285729	AC092835.2	N.S.
0.759223	-2.03209	2.36875	-0.857877	0.390961	0.520693	AC092881.1	N.S.
0	NA	NA	NA	NA	NA	AC100821.2	N.S.
0	NA	NA	NA	NA	NA	AC104057.1	N.S.
0	NA	NA	NA	NA	NA	AC104073.2	N.S.
0	NA	NA	NA	NA	NA	AC104389.1	N.S.
0	NA	NA	NA	NA	NA	AC104389.2	N.S.
3.75486	-1.30011	1.19616	-1.0869	0.277082	0.402205	AC104532.2	N.S.
127.237	2.57653	0.567835	4.53746	5.69365e-06	2.95112e-05	AC104534.3	padj<0.05 & Upregulated
0	NA	NA	NA	NA	NA	AC104581.1	N.S.
0	NA	NA	NA	NA	NA	AC104650.2	N.S.
0.593719	-0.48972	3.04785	-0.160677	0.872348	0.915907	AC104981.1	N.S.
0	NA	NA	NA	NA	NA	AC105009.1	N.S.
1.46791	-3.96888	2.20844	-1.79715	0.0723124	0.138013	AC105052.2	N.S.
0	NA	NA	NA	NA	NA	AC107081.1	N.S.
0.359301	-0.671121	3.41839	-0.196327	0.844355	NA	AC108925.1	N.S.
14.9945	5.31834	1.13875	4.67032	3.00727e-06	1.62089e-05	AC108938.5	padj<0.05 & Upregulated
0	NA	NA	NA	NA	NA	AC109344.1	N.S.
9.95514	-0.140037	0.546036	-0.256462	0.797594	0.864176	AC109486.1	N.S.
0.121161	-0.665912	3.53381	-0.18844	0.850532	NA	AC109829.1	N.S.
0.869663	-1.23369	2.33286	-0.528832	0.596922	0.706618	AC109829.2	N.S.
0	NA	NA	NA	NA	NA	AC110602.1	N.S.
212.247	1.37374	0.931352	1.475	0.140214	0.235725	AC110615.1	N.S.
0	NA	NA	NA	NA	NA	AC112719.2	N.S.
613.665	-0.652292	0.180543	-3.61295	0.000302737	0.00115218	AC113404.1	padj<0.05 & Downregulated
0	NA	NA	NA	NA	NA	AC118758.1	N.S.
0	NA	NA	NA	NA	NA	AC123512.1	N.S.
0	NA	NA	NA	NA	NA	AC123512.2	N.S.
0	NA	NA	NA	NA	NA	AC123512.3	N.S.
0.39616	0.800521	3.32725	0.240595	0.809869	NA	AC124312.1	N.S.
0	NA	NA	NA	NA	NA	AC126407.1	N.S.
160.6	-1.1341	0.335726	-3.37804	0.000730037	0.00253542	AC129492.1	padj<0.05 & Downregulated
60.1161	0.41297	0.311091	1.32749	0.184346	0.293345	AC130310.1	N.S.
0	NA	NA	NA	NA	NA	AC131263.1	N.S.
48.2307	0.269325	0.682645	0.394531	0.693189	0.784535	AC133551.1	N.S.
0	NA	NA	NA	NA	NA	AC136352.4	N.S.
0.117243	-0.670608	3.53381	-0.189769	0.84949	NA	AC136352.5	N.S.
120.317	-0.243549	0.304186	-0.800658	0.423329	0.551417	AC136612.1	N.S.
1968.43	-0.041714	0.14716	-0.283461	0.776824	0.848635	AC136616.1	N.S.
0	NA	NA	NA	NA	NA	AC136616.2	N.S.
0	NA	NA	NA	NA	NA	AC136616.3	N.S.
0	NA	NA	NA	NA	NA	AC138028.1	N.S.
3572.31	0.666041	0.16192	4.11339	3.89884e-05	0.000176018	AC138969.4	padj<0.05 & Upregulated
0	NA	NA	NA	NA	NA	AC141272.1	N.S.
0	NA	NA	NA	NA	NA	AC142525.1	N.S.
1075.77	0.612489	0.160437	3.81764	0.000134734	0.000549366	AC145212.2	padj<0.05 & Upregulated
761.435	0.00104425	0.108854	0.00959319	0.992346	0.99549	AC145212.4	N.S.
28.4799	-0.881154	0.530805	-1.66003	0.0969075	0.175428	AC156455.2	N.S.
0	NA	NA	NA	NA	NA	AC171558.1	N.S.
0	NA	NA	NA	NA	NA	AC171558.2	N.S.
0.24611	1.51679	3.525	0.430296	0.66698	NA	AC208162.1	N.S.
0.360066	0.765544	3.40989	0.224507	0.822363	NA	AC213203.1	N.S.
0	NA	NA	NA	NA	NA	AC231657.1	N.S.
0	NA	NA	NA	NA	NA	AC233755.1	N.S.
0	NA	NA	NA	NA	NA	AC233755.2	N.S.
10.5931	0.673579	0.699387	0.9631	0.335497	0.46498	AC234582.1	N.S.
0.236369	0.0538994	3.53381	0.0152525	0.987831	NA	AC234582.2	N.S.
0	NA	NA	NA	NA	NA	AC236040.1	N.S.
3303.78	0.126138	0.0866597	1.45555	0.145516	0.242866	AC240274.1	N.S.
23.6421	-0.0940407	0.705679	-0.133263	0.893986	0.930721	AC241377.2	N.S.
414.428	0.284913	0.285069	0.999454	0.317575	0.446243	AC241585.2	N.S.
0	NA	NA	NA	NA	NA	AC242988.1	N.S.
30.6115	-1.79615	0.44773	-4.01167	6.02896e-05	0.000262898	AC243687.1	padj<0.05 & Downregulated
0.238145	0.054878	3.53381	0.0155294	0.98761	NA	AC243756.1	N.S.
0	NA	NA	NA	NA	NA	AC243790.2	N.S.
0.235248	-1.37067	3.53268	-0.387997	0.698019	NA	AC243945.1	N.S.
0	NA	NA	NA	NA	NA	AC245015.1	N.S.
340.514	0.248057	0.338668	0.732447	0.463896	0.589672	AC245100.1	N.S.
102.095	0.0267562	0.188059	0.142276	0.886862	0.926207	AC253572.1	N.S.
12.6904	-1.04992	0.810028	-1.29616	0.194922	0.306706	AC254560.1	N.S.
0	NA	NA	NA	NA	NA	AC254788.1	N.S.
0.24611	1.51679	3.525	0.430296	0.66698	NA	AC254847.1	N.S.
0.115764	0.776269	3.53381	0.219669	0.826129	NA	AC254944.3	N.S.
0	NA	NA	NA	NA	NA	AC254995.1	N.S.
4662.41	0.88485	0.166327	5.31993	1.03808e-07	6.86186e-07	ACAA1	padj<0.05 & Upregulated
4698.8	0.0707008	0.130281	0.542677	0.587352	0.698753	ACAA2	N.S.
6214	-0.0587674	0.0893936	-0.6574	0.510924	0.631759	ACACA	N.S.
1416.76	-0.920503	0.12396	-7.4258	1.12104e-13	1.37225e-12	ACACB	padj<0.05 & Downregulated
3013.98	-0.527637	0.126648	-4.16617	3.09763e-05	0.000142054	ACAD10	padj<0.05 & Downregulated
2479.13	-0.205459	0.0919686	-2.23402	0.0254821	0.0575808	ACAD11	N.S.
2169.91	-0.054679	0.100845	-0.542207	0.587676	0.698996	ACAD8	N.S.
2362.46	-0.0370956	0.13752	-0.269748	0.787354	0.85681	ACAD9	N.S.
8.03418	3.17909	1.25732	2.52847	NA	NA	ACADL	N.S.
2844.21	-0.509325	0.10043	-5.07145	3.94787e-07	2.41967e-06	ACADM	padj<0.05 & Downregulated
417.575	-0.128575	0.277801	-0.462832	0.643485	0.744595	ACADS	N.S.
1873.64	0.0029314	0.1203	0.0243674	0.98056	0.988156	ACADSB	N.S.
32598.3	0.41011	0.168775	2.42992	0.0151023	0.0367818	ACADVL	padj<0.05 & Upregulated
15.3937	1.08089	0.665313	1.62464	0.104239	0.186396	ACAN	N.S.
206.784	-0.69046	0.320674	-2.15315	0.0313068	0.0684103	ACAP1	N.S.
4795.79	-0.0459686	0.121952	-0.37694	0.706218	0.794558	ACAP2	N.S.
5093.02	-0.391341	0.176003	-2.2235	0.0261823	0.0588882	ACAP3	N.S.
5908.46	-0.419253	0.166445	-2.51887	0.0117733	0.0297463	ACAT1	padj<0.05 & Downregulated
2123.6	0.0252343	0.176349	0.143093	0.886217	0.925896	ACAT2	N.S.
9440.32	0.271221	0.133585	2.03032	0.042324	0.0883003	ACBD3	N.S.
1179.73	-0.608614	0.218004	-2.79176	0.00524227	0.0146674	ACBD4	padj<0.05 & Downregulated
2490.94	-0.00924746	0.103552	-0.0893022	0.928842	0.954889	ACBD5	N.S.
4362.31	-0.299328	0.127362	-2.35022	0.0187624	0.0442697	ACBD6	padj<0.05 & Downregulated
45.8885	-1.06458	0.396896	-2.68226	0.00731273	0.0196917	ACBD7	padj<0.05 & Downregulated
779.38	-0.735891	0.300388	-2.4498	0.0142937	0.0351144	ACCS	padj<0.05 & Downregulated
0	NA	NA	NA	NA	NA	ACCSL	N.S.
2011.67	-0.23442	0.100995	-2.3211	0.0202815	0.0473009	ACD	padj<0.05 & Downregulated
6.11904	-0.237201	0.845212	-0.280641	0.778985	0.850303	ACE	N.S.
57.8589	5.53701	0.593934	9.32259	1.13536e-20	2.16289e-19	ACE2	padj<0.05 & Upregulated
0.492219	2.45323	3.46228	0.708561	0.478597	NA	ACER1	N.S.
350.497	-0.319692	0.224919	-1.42136	0.155211	0.256104	ACER2	N.S.
2644.33	-0.262161	0.139109	-1.88457	0.0594875	0.117446	ACER3	N.S.
526.455	1.91405	0.232768	8.22298	1.98503e-16	2.915e-15	ACHE	padj<0.05 & Upregulated
12360.5	0.202188	0.0950553	2.12706	0.0334153	0.0722031	ACIN1	N.S.
0.123055	0.776761	3.53381	0.219808	0.826021	NA	ACKR1	N.S.
60.097	1.68213	0.273957	6.14014	8.24475e-10	7.11105e-09	ACKR2	padj<0.05 & Upregulated
81.3576	5.06277	0.509535	9.93606	2.90088e-23	6.28921e-22	ACKR3	padj<0.05 & Upregulated
11.25	1.94218	0.579222	3.35309	0.000799147	0.00275078	ACKR4	padj<0.05 & Upregulated
25514	0.0602678	0.114359	0.527003	0.598191	0.707544	ACLY	N.S.
1.34445	-2.99043	1.99972	-1.49543	0.134803	0.228732	ACMSD	N.S.
3160.79	-1.11534	0.096069	-11.6098	3.67432e-31	1.12363e-29	ACO1	padj<0.05 & Downregulated
23614.4	-0.516584	0.162002	-3.18875	0.00142888	0.00462521	ACO2	padj<0.05 & Downregulated
472.158	-0.312252	0.137238	-2.27526	0.0228901	0.0524995	ACOT1	N.S.
1228.16	-0.0505155	0.144676	-0.349163	0.726967	0.810681	ACOT11	N.S.
10.9638	-1.82716	0.84386	-2.16525	0.0303689	0.0667204	ACOT12	N.S.
4694.04	-0.661736	0.146793	-4.50795	6.54566e-06	3.35581e-05	ACOT13	padj<0.05 & Downregulated
4966.28	-0.370292	0.108824	-3.40266	0.000667324	0.00234282	ACOT2	padj<0.05 & Downregulated
4.19619	0.549356	0.842363	0.65216	0.514298	0.635031	ACOT4	N.S.
1.08232	-0.995807	1.95158	-0.510257	0.609871	0.717616	ACOT6	N.S.
14148.5	-0.57833	0.0922207	-6.27115	3.58381e-10	3.19536e-09	ACOT7	padj<0.05 & Downregulated
771.562	0.200871	0.140864	1.42599	0.15387	0.254305	ACOT8	N.S.
4642.94	0.101831	0.117472	0.866853	0.386023	0.515765	ACOT9	N.S.
4952.44	-0.247759	0.110843	-2.23523	0.0254024	0.0574454	ACOX1	N.S.
32.8602	2.36689	0.456948	5.17977	2.22165e-07	1.41282e-06	ACOX2	padj<0.05 & Upregulated
1707.39	0.0498709	0.132003	0.377802	0.705578	0.794042	ACOX3	N.S.
2.81373	0.373056	1.0256	0.363745	0.716048	0.802252	ACOXL	N.S.
11648.1	-0.0276944	0.0861803	-0.321354	0.747942	0.826772	ACP1	N.S.
4065.3	0.339208	0.106129	3.19617	0.00139264	0.00452133	ACP2	padj<0.05 & Upregulated
8.34088	0.422419	0.844755	0.500049	0.61704	0.722679	ACP5	N.S.
1453.48	-0.192999	0.145726	-1.3244	0.185372	0.294496	ACP6	N.S.
0	NA	NA	NA	NA	NA	ACP7	N.S.
1.34626	2.06215	1.64637	1.25254	0.210373	0.325551	ACPP	N.S.
0.64477	-0.520845	2.20164	-0.236571	0.812989	0.874335	ACPT	N.S.
18.3169	1.46948	0.485222	3.02847	0.00245794	0.00748503	ACR	padj<0.05 & Upregulated
43.2806	0.84272	0.428743	1.96556	0.0493493	0.100621	ACRBP	N.S.
107.078	0.321722	0.279567	1.15079	0.24982	0.371205	ACRC	N.S.
10.3299	-0.370118	0.622404	-0.594659	0.552071	0.667811	ACRV1	N.S.
14.4505	-0.263973	0.784032	-0.336686	0.736353	0.818009	ACSBG1	N.S.
1.08796	1.72165	2.3395	0.735906	0.461788	0.587635	ACSBG2	N.S.
1151.07	-0.115888	0.218499	-0.530383	0.595846	0.705536	ACSF2	N.S.
2702.31	0.124758	0.131542	0.948429	0.342911	0.473073	ACSF3	N.S.
5118.15	-0.372409	0.174715	-2.13152	0.0330459	0.0715202	ACSL1	N.S.
7405.49	1.12655	0.201014	5.60431	2.09085e-08	1.52237e-07	ACSL3	padj<0.05 & Upregulated
2432.06	1.2126	0.174062	6.96648	3.24972e-12	3.53374e-11	ACSL4	padj<0.05 & Upregulated
925.819	6.35486	0.305993	20.768	8.43555e-96	1.1578e-93	ACSL5	padj<0.05 & Upregulated
91.4076	-0.78831	0.389373	-2.02456	0.0429122	0.0892817	ACSL6	N.S.
0.68352	2.8869	2.34969	1.22863	0.21921	0.336093	ACSM1	N.S.
0	NA	NA	NA	NA	NA	ACSM2A	N.S.
0	NA	NA	NA	NA	NA	ACSM2B	N.S.
14.0623	0.853427	0.604783	1.41113	0.158207	0.259793	ACSM3	N.S.
0	NA	NA	NA	NA	NA	ACSM4	N.S.
2.45596	4.77225	1.69966	2.80777	0.00498855	0.0140341	ACSM5	padj<0.05 & Upregulated
1.61725	-1.03281	1.49875	-0.689118	0.490749	0.613604	ACSM6	N.S.
3.80699	0.068528	0.929235	0.0737467	0.941212	0.962583	ACSS1	N.S.
6532.45	0.026223	0.149653	0.175225	0.860903	0.908487	ACSS2	N.S.
5.69678	-0.0297633	1.38377	-0.0215088	0.98284	0.989622	ACSS3	N.S.
41.3456	-0.144747	0.349609	-0.414025	0.678855	0.773299	ACTA1	N.S.
1963.34	1.27964	0.193252	6.6216	3.55326e-11	3.45629e-10	ACTA2	padj<0.05 & Upregulated
362428	0.417274	0.158067	2.63986	0.00829403	0.0219483	ACTB	padj<0.05 & Upregulated
2346.14	6.86082	0.32511	21.103	7.45808e-99	1.07439e-96	ACTBL2	padj<0.05 & Upregulated
1.72918	1.56111	1.8214	0.857093	0.391393	0.521031	ACTC1	N.S.
469636	-0.254221	0.0846708	-3.00247	0.00267802	0.00806924	ACTG1	padj<0.05 & Downregulated
7.61424	1.63208	0.713153	2.28855	0.0221058	0.0510163	ACTG2	N.S.
3.87479	0.659307	0.976325	0.675295	0.499489	0.621411	ACTL10	N.S.
4279.66	-0.323458	0.0749018	-4.31844	1.57139e-05	7.55403e-05	ACTL6A	padj<0.05 & Downregulated
8.0057	-2.18464	0.830285	-2.6312	0.00850851	0.0224403	ACTL6B	padj<0.05 & Downregulated
0.231685	1.45717	3.52932	0.412876	0.679698	NA	ACTL7A	N.S.
2.16538	0.650503	1.24193	0.523784	0.600429	0.709228	ACTL7B	N.S.
19.7654	1.52122	0.573197	2.65391	0.00795641	0.0211673	ACTL8	padj<0.05 & Upregulated
0	NA	NA	NA	NA	NA	ACTL9	N.S.
26003.2	1.1903	0.11388	10.4522	1.43223e-25	3.48677e-24	ACTN1	padj<0.05 & Upregulated
51.4577	2.40067	0.351568	6.82849	8.58157e-12	8.97333e-11	ACTN2	padj<0.05 & Upregulated
9.31094	-0.517626	0.745344	-0.69448	0.487382	0.610769	ACTN3	N.S.
32615.4	1.96883	0.141582	13.9059	5.82955e-44	2.72426e-42	ACTN4	padj<0.05 & Upregulated
6723.7	0.322536	0.149593	2.15609	0.0310768	0.0680015	ACTR10	N.S.
13130.5	-0.0362176	0.0988265	-0.366476	0.71401	0.800534	ACTR1A	N.S.
5645.95	0.186925	0.162847	1.14786	0.251028	0.372555	ACTR1B	N.S.
36466.8	-0.420312	0.127962	-3.28467	0.00102101	0.00342059	ACTR2	padj<0.05 & Downregulated
20478.3	-0.28819	0.153399	-1.8787	0.0602853	0.118846	ACTR3	N.S.
745.038	-0.460743	0.126528	-3.64144	0.000271121	0.00104302	ACTR3B	padj<0.05 & Downregulated
6.95551	5.07112	1.37828	3.67931	0.000233869	0.000911597	ACTR3C	padj<0.05 & Upregulated
612.645	-0.237821	0.119483	-1.99041	0.0465458	0.095677	ACTR5	N.S.
2679.71	-0.216704	0.113348	-1.91185	0.0558952	0.111464	ACTR6	N.S.
2001.37	0.0755733	0.0824927	0.91612	0.359604	0.490025	ACTR8	N.S.
0	NA	NA	NA	NA	NA	ACTRT1	N.S.
0	NA	NA	NA	NA	NA	ACTRT2	N.S.
374.387	-0.359525	0.189754	-1.89469	0.0581337	0.115138	ACTRT3	N.S.
2439.25	0.544924	0.0826852	6.59035	4.38803e-11	4.21885e-10	ACVR1	padj<0.05 & Upregulated
1816.64	0.274987	0.110327	2.49248	0.0126855	0.0317155	ACVR1B	padj<0.05 & Upregulated
55.641	2.00538	0.267151	7.50653	6.07173e-14	7.6693e-13	ACVR1C	padj<0.05 & Upregulated
1331.03	-0.0413347	0.0833596	-0.49586	0.619993	0.72526	ACVR2A	N.S.
772.523	0.0649954	0.11114	0.584807	0.558678	0.67405	ACVR2B	N.S.
106.293	5.71004	0.608005	9.39143	5.91901e-21	1.14511e-19	ACVRL1	padj<0.05 & Upregulated
1865.11	-0.236651	0.136792	-1.73001	0.0836287	0.155508	ACY1	N.S.
0	NA	NA	NA	NA	NA	ACY3	N.S.
575.962	-0.404915	0.125027	-3.23862	0.00120109	0.00396143	ACYP1	padj<0.05 & Downregulated
1124.84	0.404025	0.148995	2.71167	0.00669453	0.0182161	ACYP2	padj<0.05 & Upregulated
28.9916	0.43574	0.357138	1.22009	0.222432	0.339421	AD000671.6	N.S.
1523.03	0.155041	0.151289	1.0248	0.305459	0.433494	ADA	N.S.
0	NA	NA	NA	NA	NA	ADAD1	N.S.
3.45549	2.76634	1.15935	2.38612	0.0170271	0.0407579	ADAD2	padj<0.05 & Upregulated
274.709	-0.0915709	0.147895	-0.619161	0.53581	0.654009	ADAL	N.S.
8150.7	0.0294253	0.172364	0.170716	0.864447	0.910794	ADAM10	N.S.
1579.04	-1.68162	0.504413	-3.33382	0.000856636	0.00292666	ADAM11	padj<0.05 & Downregulated
258.429	6.2546	0.988728	6.32591	2.51745e-10	2.27602e-09	ADAM12	padj<0.05 & Upregulated
7958	1.04342	0.176531	5.91069	3.40678e-09	2.72401e-08	ADAM15	padj<0.05 & Upregulated
5803.55	0.221714	0.175816	1.26106	0.207288	0.321862	ADAM17	N.S.
0.520085	-1.01835	3.06299	-0.33247	0.739535	NA	ADAM18	N.S.
4851.57	2.26641	0.136705	16.5788	9.91514e-62	6.9972e-60	ADAM19	padj<0.05 & Upregulated
0.587263	-2.34039	2.93159	-0.798335	0.424676	NA	ADAM2	N.S.
3.5101	0.894766	0.940377	0.951498	0.341352	0.471519	ADAM20	N.S.
26.4754	3.95097	0.596879	6.61939	3.60684e-11	3.50256e-10	ADAM21	padj<0.05 & Upregulated
1139.67	-1.57111	0.211255	-7.43704	1.02965e-13	1.26571e-12	ADAM22	padj<0.05 & Downregulated
3022.66	-1.59561	0.157075	-10.1583	3.04254e-24	6.92357e-23	ADAM23	padj<0.05 & Downregulated
12.8322	0.897721	0.703435	1.27619	0.201887	0.315585	ADAM28	N.S.
0.592461	-0.00952929	3.02099	-0.00315436	0.997483	NA	ADAM29	N.S.
0.115843	0.776761	3.53381	0.219808	0.826021	NA	ADAM30	N.S.
30.4812	0.00525423	0.557283	0.0094283	0.992477	0.99549	ADAM32	N.S.
0.484215	1.3014	3.13116	0.41563	0.677681	NA	ADAM33	N.S.
138.126	-3.23206	0.379297	-8.52118	1.5794e-17	2.4892e-16	ADAM7	padj<0.05 & Downregulated
409.535	0.200445	0.268248	0.747237	0.45492	0.581187	ADAM8	N.S.
14224.5	0.888112	0.241707	3.67433	0.000238473	0.000927863	ADAM9	padj<0.05 & Upregulated
0	NA	NA	NA	NA	NA	ADAMDEC1	N.S.
6725.96	0.0166515	0.147685	0.11275	0.910228	0.94157	ADAMTS1	N.S.
467.721	0.387088	0.326489	1.18561	0.235777	0.354479	ADAMTS10	N.S.
21.7473	5.10276	0.928968	5.49294	3.95305e-08	2.76618e-07	ADAMTS12	padj<0.05 & Upregulated
668.86	0.186704	0.279454	0.668103	0.504068	0.625768	ADAMTS13	N.S.
203.46	2.60084	0.289088	8.99671	2.32582e-19	4.10754e-18	ADAMTS14	padj<0.05 & Upregulated
1726.07	3.7344	0.15181	24.5992	1.28944e-133	3.21089e-131	ADAMTS15	padj<0.05 & Upregulated
25.42	6.52169	1.11982	5.82389	5.74928e-09	4.48192e-08	ADAMTS16	padj<0.05 & Upregulated
98.9485	0.944902	0.254749	3.70915	0.000207955	0.000819918	ADAMTS17	padj<0.05 & Upregulated
3.46536	2.67133	1.41228	1.8915	0.0585571	0.115818	ADAMTS18	N.S.
4.71534	-1.0753	0.948148	-1.1341	0.256751	0.379563	ADAMTS19	N.S.
446.969	0.148027	0.163622	0.904685	0.365632	0.495786	ADAMTS2	N.S.
0.817573	1.09718	2.4336	0.450847	0.6521	0.751301	ADAMTS20	N.S.
531.553	-0.499848	0.289655	-1.72567	0.0844072	0.156755	ADAMTS3	N.S.
34.6769	2.46202	0.543307	4.53154	5.85545e-06	3.02868e-05	ADAMTS4	padj<0.05 & Upregulated
196.093	0.0108164	0.274797	0.0393613	0.968602	0.980642	ADAMTS5	N.S.
123.889	-0.310955	0.29252	-1.06302	0.287772	0.414352	ADAMTS6	N.S.
3291.71	-0.644433	0.193487	-3.33062	0.000866517	0.00295593	ADAMTS7	padj<0.05 & Downregulated
27.9675	-0.0231874	0.448181	-0.0517366	0.958739	0.974244	ADAMTS8	N.S.
28.4328	0.454436	0.505887	0.898295	0.369028	0.499131	ADAMTS9	N.S.
819.062	0.29466	0.307531	0.958145	0.33799	0.467691	ADAMTSL1	N.S.
0.351126	1.97631	3.49265	0.56585	0.571496	NA	ADAMTSL2	N.S.
7401.83	-0.725367	0.200432	-3.61901	0.000295729	0.00112822	ADAMTSL3	padj<0.05 & Downregulated
2005.11	1.07158	0.320737	3.341	0.000834758	0.00286149	ADAMTSL4	padj<0.05 & Upregulated
1149.78	0.0229956	0.234713	0.0979733	0.921954	0.949573	ADAMTSL5	N.S.
1775.5	-0.337544	0.150658	-2.24047	0.0250606	0.0567683	ADAP1	N.S.
1077.78	-0.725912	0.230819	-3.14493	0.00166125	0.00529481	ADAP2	padj<0.05 & Downregulated
40353.9	0.514298	0.130792	3.93218	8.41779e-05	0.000356662	ADAR	padj<0.05 & Upregulated
1107.83	-0.341316	0.127252	-2.68222	0.00731363	0.0196917	ADARB1	padj<0.05 & Downregulated
4.15957	4.08482	1.71564	2.38092	0.0172693	0.0412245	ADARB2	padj<0.05 & Upregulated
775.735	-0.117944	0.132617	-0.88936	0.373809	0.50374	ADAT1	N.S.
723.737	-0.732578	0.114829	-6.37971	1.77422e-10	1.62685e-09	ADAT2	padj<0.05 & Downregulated
938.358	-0.327657	0.127596	-2.56792	0.010231	0.0263733	ADAT3	padj<0.05 & Downregulated
762.886	0.0413583	0.120679	0.342714	0.731814	0.814419	ADCK1	N.S.
3272.94	-0.373574	0.119401	-3.12874	0.00175556	0.00555376	ADCK2	padj<0.05 & Downregulated
2889.04	0.183409	0.13141	1.3957	0.162804	0.265741	ADCK3	N.S.
2616.54	-0.71573	0.135139	-5.29627	1.18192e-07	7.74804e-07	ADCK4	padj<0.05 & Downregulated
794.156	0.24588	0.215111	1.14304	0.253022	0.374877	ADCK5	N.S.
2964.53	-0.905713	0.174461	-5.19149	2.08616e-07	1.33006e-06	ADCY1	padj<0.05 & Downregulated
7.77736	0.971799	0.725345	1.33977	0.180319	0.287991	ADCY10	N.S.
11.7363	0.919105	0.775808	1.18471	0.236134	0.354893	ADCY2	N.S.
3825.86	-0.382798	0.127605	-2.99987	0.00270098	0.00813	ADCY3	padj<0.05 & Downregulated
0.857528	-1.30535	2.39261	-0.545574	0.585359	0.697143	ADCY4	N.S.
496.978	-0.0906734	0.373556	-0.242731	0.808214	0.87124	ADCY5	N.S.
4609.46	-0.0331539	0.133328	-0.248665	0.80362	0.868169	ADCY6	N.S.
1553.8	0.0930429	0.231046	0.402703	0.687167	0.779971	ADCY7	N.S.
2.49921	0.66666	1.39569	0.477656	0.632895	0.73576	ADCY8	N.S.
2745.43	0.61846	0.08908	6.94275	3.84538e-12	4.15039e-11	ADCY9	padj<0.05 & Upregulated
12.8058	0.177236	0.584214	0.303376	0.761603	0.83624	ADCYAP1	N.S.
75.2427	-1.09936	0.483445	-2.27401	0.0229654	0.0526446	ADCYAP1R1	N.S.
15678.1	0.413198	0.149115	2.771	0.00558852	0.0155241	ADD1	padj<0.05 & Upregulated
3833.09	-0.999584	0.296358	-3.37289	0.000743835	0.00257923	ADD2	padj<0.05 & Downregulated
11443.2	-0.079506	0.142699	-0.557158	0.577419	0.690045	ADD3	N.S.
1.96364	-1.7235	1.83515	-0.939161	0.347648	0.478019	ADGB	N.S.
49.9099	-0.959973	0.450441	-2.13119	0.0330738	0.0715276	ADGRA1	N.S.
997.138	-0.250969	0.131521	-1.9082	0.0563654	0.112209	ADGRA2	N.S.
4172.68	-0.616153	0.201537	-3.05727	0.00223359	0.00688971	ADGRA3	padj<0.05 & Downregulated
2737.49	-0.867591	0.261565	-3.31692	0.000910146	0.00308773	ADGRB1	padj<0.05 & Downregulated
3640.4	0.337514	0.180079	1.87426	0.0608949	0.119701	ADGRB2	N.S.
30.2749	-0.623415	0.508959	-1.22488	0.22062	0.337276	ADGRB3	N.S.
17.1035	2.81338	0.623099	4.51514	6.32759e-06	3.25166e-05	ADGRD1	padj<0.05 & Upregulated
0.115843	0.776761	3.53381	0.219808	0.826021	NA	ADGRD2	N.S.
16.0138	3.31491	0.625162	5.30248	1.14239e-07	7.49454e-07	ADGRE1	padj<0.05 & Upregulated
28.7101	-0.458828	0.512847	-0.894668	0.370964	0.500835	ADGRE2	N.S.
0	NA	NA	NA	NA	NA	ADGRE3	N.S.
3747.52	-0.352427	0.179012	-1.96874	0.0489833	0.0999564	ADGRE5	N.S.
155.566	5.91453	0.60977	9.6996	3.0267e-22	6.21419e-21	ADGRF1	padj<0.05 & Upregulated
2.04281	0.0781916	1.25532	0.0622879	0.950334	0.968729	ADGRF2	N.S.
10.9294	-0.435116	0.753856	-0.577187	0.563813	0.678296	ADGRF3	N.S.
102.784	7.3624	0.742049	9.92172	3.34945e-23	7.23472e-22	ADGRF4	padj<0.05 & Upregulated
359.068	3.89384	0.32216	12.0867	1.24232e-33	4.26278e-32	ADGRF5	padj<0.05 & Upregulated
2858.75	3.62011	0.252166	14.3561	9.75715e-47	4.92976e-45	ADGRG1	padj<0.05 & Upregulated
42.9089	1.14889	0.412343	2.78625	0.00533214	0.0148949	ADGRG2	padj<0.05 & Upregulated
0.415795	-0.475032	3.519	-0.134991	0.892619	NA	ADGRG3	N.S.
0.123055	0.776761	3.53381	0.219808	0.826021	NA	ADGRG4	N.S.
2.70607	-1.3637	1.21581	-1.12163	0.262018	0.385485	ADGRG5	N.S.
990.05	-0.780821	0.17579	-4.44179	8.92127e-06	4.47759e-05	ADGRG6	padj<0.05 & Downregulated
0.277882	-0.121682	3.53381	-0.0344336	0.972531	NA	ADGRG7	N.S.
8375.85	-0.266648	0.0994228	-2.68196	0.00731915	0.0196944	ADGRL1	padj<0.05 & Downregulated
18396.2	-0.718911	0.157344	-4.56904	4.89964e-06	2.56089e-05	ADGRL2	padj<0.05 & Downregulated
45.966	-0.711033	0.289158	-2.45898	0.0139333	0.0343766	ADGRL3	padj<0.05 & Downregulated
4.981	-0.436175	0.901774	-0.483685	0.628609	0.73195	ADGRL4	N.S.
1945.16	-0.893348	0.356608	-2.50512	0.0122408	0.0307627	ADGRV1	padj<0.05 & Downregulated
0.120516	-0.665912	3.53381	-0.18844	0.850532	NA	ADH1A	N.S.
0.278406	0.0556607	3.53381	0.0157509	0.987433	NA	ADH1B	N.S.
0.116482	-0.665912	3.53381	-0.18844	0.850532	NA	ADH1C	N.S.
0.121161	-0.665912	3.53381	-0.18844	0.850532	NA	ADH4	N.S.
11334.9	-0.232474	0.0941345	-2.4696	0.0135265	0.0334962	ADH5	padj<0.05 & Downregulated
2.89806	0.307563	1.12614	0.273114	0.784766	0.855007	ADH6	N.S.
4.60427	5.67198	1.44661	3.92087	8.82311e-05	0.000372748	ADH7	padj<0.05 & Upregulated
19.689	1.01959	0.464521	2.19493	0.0281689	0.0626212	ADHFE1	N.S.
6292.96	0.717524	0.201579	3.55952	0.000371528	0.00138201	ADI1	padj<0.05 & Upregulated
0.121161	-0.665912	3.53381	-0.18844	0.850532	NA	ADIG	N.S.
0	NA	NA	NA	NA	NA	ADIPOQ	N.S.
11932.7	0.171869	0.0963175	1.7844	0.0743584	0.141423	ADIPOR1	N.S.
7865.83	-0.000907428	0.0950416	-0.00954769	0.992382	0.99549	ADIPOR2	N.S.
1.71631	2.48001	1.73568	1.42884	0.153051	0.253259	ADIRF	N.S.
2874.31	0.3888	0.147275	2.63997	0.00829141	0.0219447	ADK	padj<0.05 & Upregulated
2456.21	1.02033	0.164991	6.18415	6.24382e-10	5.45271e-09	ADM	padj<0.05 & Upregulated
8.64623	0.163774	0.656319	0.249534	0.802948	0.868034	ADM2	N.S.
262.164	-1.27865	0.247408	-5.16817	2.36391e-07	1.49892e-06	ADM5	padj<0.05 & Downregulated
4486.06	-0.196735	0.10524	-1.86939	0.0615689	0.120775	ADNP	N.S.
3910.08	-0.203742	0.108817	-1.87233	0.0611606	0.120096	ADNP2	N.S.
3019.16	-0.190265	0.0756127	-2.51631	0.011859	0.029926	ADO	padj<0.05 & Downregulated
155.848	1.37508	0.205235	6.7	2.08421e-11	2.09366e-10	ADORA1	padj<0.05 & Upregulated
17.0699	-0.281786	0.900769	-0.312828	0.754411	0.831498	ADORA2A	N.S.
1472.63	1.29686	0.168418	7.70028	1.35771e-14	1.78478e-13	ADORA2B	padj<0.05 & Upregulated
0.408039	0.983655	3.28789	0.299175	0.764807	NA	ADORA3	N.S.
5839.98	-0.166478	0.0769481	-2.1635	0.0305025	0.0669717	ADPGK	N.S.
7.12334	3.07655	0.940558	3.27099	0.00107173	0.00356781	ADPRH	padj<0.05 & Upregulated
1140.77	-0.443444	0.217184	-2.04179	0.0411723	0.0862278	ADPRHL1	N.S.
4646.05	0.650927	0.131165	4.96266	6.95333e-07	4.10442e-06	ADPRHL2	padj<0.05 & Upregulated
750.999	0.675847	0.194142	3.4812	0.00049918	0.00180523	ADPRM	padj<0.05 & Upregulated
16.7325	-1.99498	0.564326	-3.53515	0.00040755	0.00150159	ADRA1A	padj<0.05 & Downregulated
142.351	4.92144	0.314366	15.6551	3.0651e-55	1.87466e-53	ADRA1B	padj<0.05 & Upregulated
54.0345	1.91385	0.347567	5.50643	3.66176e-08	2.57891e-07	ADRA1D	padj<0.05 & Upregulated
9.1967	-0.274133	0.560777	-0.488846	0.624951	0.729347	ADRA2A	N.S.
35.5215	-0.707734	0.531193	-1.33235	0.182746	0.29128	ADRA2B	N.S.
3035.47	-0.827913	0.216626	-3.82186	0.000132447	0.000540959	ADRA2C	padj<0.05 & Downregulated
6.75396	1.98895	0.769751	2.58389	0.00976941	0.0253479	ADRB1	padj<0.05 & Upregulated
248.506	6.98002	0.458142	15.2355	2.05613e-52	1.21083e-50	ADRB2	padj<0.05 & Upregulated
0.482553	2.163	3.1191	0.693469	0.488015	NA	ADRB3	N.S.
5136.63	-0.123952	0.11505	-1.07738	0.281312	0.407136	ADRBK1	N.S.
1793.27	-0.703057	0.178295	-3.94321	8.03976e-05	0.000342141	ADRBK2	padj<0.05 & Downregulated
15394.8	-0.0444523	0.0817705	-0.543623	0.586701	0.698357	ADRM1	N.S.
6825.95	-0.369224	0.101085	-3.65261	0.000259593	0.00100243	ADSL	padj<0.05 & Downregulated
8509.85	-0.554731	0.250642	-2.21324	0.0268813	0.0602194	ADSS	N.S.
635.364	-0.824957	0.269605	-3.05987	0.00221435	0.00683762	ADSSL1	padj<0.05 & Downregulated
96.6412	10.0635	1.0977	9.16784	4.82587e-20	8.86404e-19	ADTRP	padj<0.05 & Upregulated
4.38227	0.697086	0.877037	0.794819	0.426719	0.554216	AEBP1	N.S.
3220.66	0.0985435	0.125677	0.784101	0.432981	0.56072	AEBP2	N.S.
9558.33	0.075618	0.0711056	1.06346	0.287573	0.414203	AEN	N.S.
23590.6	0.11178	0.130817	0.854481	0.392839	0.522516	AES	N.S.
229.97	-0.535398	0.320762	-1.66915	0.0950884	0.172761	AF011889.5	N.S.
8.0132	0.495127	0.629582	0.786437	0.431611	0.55932	AF111168.2	N.S.
22.9838	-0.77553	0.44154	-1.75642	0.0790164	0.148556	AF131216.1	N.S.
20.7322	4.09487	0.954101	4.29186	1.77181e-05	8.43606e-05	AF165138.7	padj<0.05 & Upregulated
4805.67	0.996627	0.101817	9.78838	1.26297e-22	2.65559e-21	AFAP1	padj<0.05 & Upregulated
948.122	-1.04126	0.212253	-4.90574	9.30769e-07	5.40988e-06	AFAP1L1	padj<0.05 & Downregulated
593.565	5.03641	0.226166	22.2686	7.44347e-110	1.25968e-107	AFAP1L2	padj<0.05 & Upregulated
1751.06	0.925015	0.124676	7.41936	1.1769e-13	1.43861e-12	AFF1	padj<0.05 & Upregulated
18.5201	-0.129523	0.675543	-0.191732	0.847952	0.899121	AFF2	N.S.
27.2789	-0.451301	0.581822	-0.775669	0.437944	0.565258	AFF3	N.S.
10644.7	0.227673	0.139286	1.63456	0.10214	0.183192	AFF4	N.S.
9877.75	-0.185542	0.116541	-1.59208	0.111367	0.196421	AFG3L2	N.S.
13.1023	-1.15764	0.587741	-1.96965	0.0488787	0.0997548	AFM	N.S.
2316.45	-0.472564	0.137681	-3.43232	0.000598435	0.0021325	AFMID	padj<0.05 & Downregulated
146.613	1.42779	0.485885	2.93855	0.00329756	0.00970288	AFP	padj<0.05 & Upregulated
3240.93	0.596912	0.153979	3.87659	0.00010593	0.000441317	AFTPH	padj<0.05 & Upregulated
1106.75	0.0356761	0.151759	0.235085	0.814143	0.87482	AGA	N.S.
2907.41	0.152941	0.122359	1.24994	0.211321	0.326584	AGAP1	N.S.
153.84	1.87856	0.273846	6.85993	6.88955e-12	7.26069e-11	AGAP14P	padj<0.05 & Upregulated
1318.92	-1.72814	0.568438	-3.04015	0.00236463	0.00723246	AGAP2	padj<0.05 & Downregulated
5181.95	0.56261	0.140089	4.01609	5.91714e-05	0.000258825	AGAP3	padj<0.05 & Upregulated
652.755	0.209845	0.160435	1.30798	0.19088	0.301407	AGAP4	N.S.
224.617	0.43172	0.178279	2.42159	0.0154528	0.0375149	AGAP5	padj<0.05 & Upregulated
1151.9	0.155478	0.125065	1.24318	0.213802	0.329454	AGAP6	N.S.
510.44	0.330915	0.195606	1.69174	0.0906955	0.166272	AGAP9	N.S.
1.19861	3.7157	2.99293	1.24149	0.214423	0.330265	AGBL1	N.S.
113.615	-0.678547	0.43129	-1.57329	0.115651	0.202421	AGBL2	N.S.
109.253	-0.061779	0.218968	-0.282138	0.777838	0.84937	AGBL3	N.S.
23.534	-1.86494	0.579808	-3.21648	0.00129772	0.00424243	AGBL4	padj<0.05 & Downregulated
5012.01	-0.460402	0.20522	-2.24346	0.0248672	0.0563742	AGBL5	N.S.
192.242	0.358137	0.237915	1.50532	0.132243	0.225132	AGER	N.S.
8003.3	0.136388	0.0994598	1.37129	0.170286	0.275475	AGFG1	N.S.
501.606	0.525038	0.132466	3.96358	7.38338e-05	0.000316682	AGFG2	padj<0.05 & Upregulated
4282.18	-0.0147757	0.0903225	-0.163589	0.870055	0.914381	AGGF1	N.S.
2723.47	-0.150364	0.101419	-1.4826	0.13818	0.233122	AGK	N.S.
2731.59	-0.402928	0.131415	-3.06607	0.00216896	0.00671053	AGL	padj<0.05 & Downregulated
13.6326	0.356068	0.500456	0.711486	0.476783	0.60123	AGMAT	N.S.
27.6718	-2.19134	0.517499	-4.23448	2.29082e-05	0.000107313	AGMO	padj<0.05 & Downregulated
3749.57	-0.158021	0.111689	-1.41484	0.157116	0.258293	AGO1	N.S.
5268.64	-0.198685	0.146667	-1.35466	0.175525	0.281989	AGO2	N.S.
2032.59	-0.277431	0.151033	-1.83689	0.0662261	0.128294	AGO3	N.S.
2020.94	0.0767907	0.0999815	0.768049	0.442458	0.569523	AGO4	N.S.
7865.62	-0.15842	0.0819268	-1.93368	0.0531524	0.106949	AGPAT1	N.S.
5696.46	-0.176545	0.104581	-1.68811	0.0913897	0.167351	AGPAT2	N.S.
3829.04	0.321142	0.0876224	3.66506	0.000247279	0.000958913	AGPAT3	padj<0.05 & Upregulated
1589.26	-0.222189	0.164756	-1.3486	0.177466	0.284425	AGPAT4	N.S.
2760.73	-0.646387	0.131361	-4.9207	8.62335e-07	5.03394e-06	AGPAT5	padj<0.05 & Downregulated
8942.29	0.785985	0.132709	5.92262	3.16859e-09	2.54759e-08	AGPS	padj<0.05 & Upregulated
3.89731	-1.84169	1.03765	-1.77487	0.0759194	0.143827	AGR2	N.S.
0.123055	0.776761	3.53381	0.219808	0.826021	NA	AGR3	N.S.
40303.6	2.0913	0.184954	11.3071	1.20963e-29	3.46793e-28	AGRN	padj<0.05 & Upregulated
0.23637	0.0537908	3.53381	0.0152217	0.987855	NA	AGRP	N.S.
5.92659	6.04289	1.29035	4.68313	2.82533e-06	1.52945e-05	AGT	padj<0.05 & Upregulated
1713.28	-0.0971248	0.161318	-0.60207	0.547128	0.663773	AGTPBP1	N.S.
3.58691	-4.48556	1.37573	-3.26049	0.00111219	0.00368988	AGTR1	padj<0.05 & Downregulated
1.11671	-1.80512	2.1857	-0.825879	0.408873	0.537243	AGTR2	N.S.
5434.62	0.301982	0.127051	2.37686	0.0174607	0.0416129	AGTRAP	padj<0.05 & Upregulated
7.83156	5.81283	1.25139	4.64511	3.399e-06	1.82189e-05	AGXT	padj<0.05 & Upregulated
0	NA	NA	NA	NA	NA	AGXT2	N.S.
8742	-0.267646	0.157048	-1.70423	0.0883388	0.162739	AHCTF1	N.S.
36189.4	-0.757763	0.109394	-6.92692	4.3011e-12	4.61086e-11	AHCY	padj<0.05 & Downregulated
9235.46	0.32257	0.0760707	4.2404	2.23125e-05	0.000104804	AHCYL1	padj<0.05 & Upregulated
1942.12	0.0753805	0.0886843	0.849987	0.395332	0.524831	AHCYL2	N.S.
1657.6	0.472564	0.09783	4.83046	1.36219e-06	7.7092e-06	AHDC1	padj<0.05 & Upregulated
840.511	-0.189173	0.145956	-1.2961	0.194942	0.30671	AHI1	N.S.
31618.9	0.856275	0.126095	6.7907	1.11592e-11	1.14963e-10	AHNAK	padj<0.05 & Upregulated
6049.69	3.10659	0.182119	17.058	3.04565e-65	2.32845e-63	AHNAK2	padj<0.05 & Upregulated
755.487	1.18727	0.365341	3.24975	0.00115505	0.00382404	AHR	padj<0.05 & Upregulated
886.379	-0.210633	0.243573	-0.864766	0.387167	0.516826	AHRR	N.S.
16190.7	-0.129918	0.127452	-1.01934	0.30804	0.435973	AHSA1	N.S.
4084.44	0.0192622	0.157452	0.122337	0.902632	0.936757	AHSA2	N.S.
13.9602	-0.832046	0.67023	-1.24143	0.214446	0.330271	AHSG	N.S.
0.123055	0.776761	3.53381	0.219808	0.826021	NA	AHSP	N.S.
11.8324	1.20717	0.560072	2.15538	0.0311321	0.0681053	AICDA	N.S.
9101.7	0.00658712	0.0823253	0.0800132	0.936227	0.959342	AIDA	N.S.
0	NA	NA	NA	NA	NA	AIF1	N.S.
1607.32	0.447114	0.20979	2.13124	0.0330694	0.0715276	AIF1L	N.S.
10827.1	-0.497691	0.141521	-3.51672	0.000436911	0.00160029	AIFM1	padj<0.05 & Downregulated
95.7669	0.767621	0.299782	2.5606	0.0104492	0.0268801	AIFM2	padj<0.05 & Upregulated
76.571	-0.172414	0.392344	-0.439447	0.660338	0.757758	AIFM3	N.S.
2221.34	-0.117106	0.180069	-0.65034	0.515473	0.636078	AIG1	N.S.
270.343	3.9807	0.333415	11.9392	7.39588e-33	2.47443e-31	AIM1	padj<0.05 & Upregulated
437.351	2.89775	0.270515	10.712	8.94394e-27	2.28595e-25	AIM1L	padj<0.05 & Upregulated
6.26013	2.88566	1.19583	2.41311	0.015817	0.038266	AIM2	padj<0.05 & Upregulated
4252.68	0.0745189	0.179018	0.416264	0.677217	0.771843	AIMP1	N.S.
3288.91	0.114876	0.157728	0.728317	0.46642	0.591586	AIMP2	N.S.
3814.96	-0.201399	0.102998	-1.95536	0.0505407	0.10263	AIP	N.S.
1.03283	2.05618	2.18476	0.941144	0.346631	0.476922	AIPL1	N.S.
0	NA	NA	NA	NA	NA	AIRE	N.S.
0	NA	NA	NA	NA	NA	AJ239318.1	N.S.
107.88	3.35231	0.3495	9.59174	8.66103e-22	1.7413e-20	AJAP1	padj<0.05 & Upregulated
9022.55	0.669762	0.196359	3.41091	0.00064746	0.00228182	AJUBA	padj<0.05 & Upregulated
5941.34	0.157887	0.1735	0.910015	0.362814	0.493462	AK1	N.S.
12184.9	-0.181104	0.0786185	-2.30358	0.0212462	0.049287	AK2	padj<0.05 & Downregulated
8472.61	0.295371	0.115194	2.56411	0.0103441	0.0266216	AK3	padj<0.05 & Upregulated
5031.59	0.911332	0.137809	6.61302	3.76566e-11	3.65474e-10	AK4	padj<0.05 & Upregulated
24.7547	1.06721	0.610196	1.74896	0.0802985	0.150439	AK5	N.S.
4028.14	-0.139555	0.127793	-1.09203	0.274818	0.399496	AK6	N.S.
233.199	-0.737642	0.197109	-3.74231	0.000182334	0.000726628	AK7	padj<0.05 & Downregulated
58.8571	0.0874632	0.342302	0.255515	0.798326	0.8647	AK8	N.S.
319.234	-0.0134855	0.191014	-0.0705997	0.943716	0.964015	AK9	N.S.
3236.62	-0.263061	0.129903	-2.02506	0.0428615	0.0892295	AKAP1	N.S.
2430.17	0.0716105	0.110187	0.649902	0.515756	0.636221	AKAP10	N.S.
2519.96	0.0196347	0.160044	0.122683	0.902358	0.936641	AKAP11	N.S.
10459.5	1.21653	0.142455	8.53974	1.34525e-17	2.13367e-16	AKAP12	padj<0.05 & Upregulated
9432.63	0.875796	0.212857	4.11449	3.88036e-05	0.00017532	AKAP13	padj<0.05 & Upregulated
0.276402	0.4971	3.53356	0.14068	0.888123	NA	AKAP14	N.S.
2954.23	0.0885753	0.0929273	0.953167	0.340505	0.4705	AKAP17A	N.S.
5205.16	1.70739	0.35208	4.84943	1.23816e-06	7.05305e-06	AKAP2	padj<0.05 & Upregulated
67.0053	0.198879	0.300774	0.661223	0.508469	0.629724	AKAP3	N.S.
0.241032	-1.39026	3.53066	-0.393767	0.693753	NA	AKAP4	N.S.
316.721	-1.01741	0.203733	-4.99382	5.9198e-07	3.53142e-06	AKAP5	padj<0.05 & Downregulated
834.183	2.52518	0.278284	9.0741	1.14617e-19	2.06394e-18	AKAP6	padj<0.05 & Upregulated
369.726	0.0467602	0.172779	0.270636	0.786671	0.85628	AKAP7	N.S.
2829.54	-0.104298	0.0732664	-1.42355	0.154577	0.255232	AKAP8	N.S.
6872.72	0.271097	0.0886626	3.05763	0.00223097	0.00688284	AKAP8L	padj<0.05 & Upregulated
3246.54	0.371237	0.139276	2.66548	0.00768779	0.020553	AKAP9	padj<0.05 & Upregulated
2566.3	0.126707	0.0647985	1.9554	0.0505354	0.10263	AKIP1	N.S.
11516.3	-0.27636	0.101604	-2.71999	0.00652846	0.0178226	AKIRIN1	padj<0.05 & Downregulated
4115.87	0.791191	0.143943	5.49657	3.87251e-08	2.71592e-07	AKIRIN2	padj<0.05 & Upregulated
465.278	-0.0609296	0.153838	-0.396063	0.692058	0.783482	AKNA	N.S.
1.61012	3.00575	2.14875	1.39884	0.161862	0.26445	AKNAD1	N.S.
8224.02	-0.275537	0.0906512	-3.03953	0.00236949	0.00724607	AKR1A1	padj<0.05 & Downregulated
6880.38	0.167334	0.190999	0.876101	0.380975	0.510672	AKR1B1	N.S.
83.2792	4.82194	0.5427	8.88509	6.38666e-19	1.09819e-17	AKR1B10	padj<0.05 & Upregulated
11.4521	6.98217	1.15617	6.03905	1.55026e-09	1.29295e-08	AKR1B15	padj<0.05 & Upregulated
415.482	4.76343	0.648042	7.3505	1.97463e-13	2.36237e-12	AKR1C1	padj<0.05 & Upregulated
395.901	6.44591	0.782686	8.23563	1.7862e-16	2.63858e-15	AKR1C2	padj<0.05 & Upregulated
1256.74	6.09149	0.632819	9.62597	6.21195e-22	1.25908e-20	AKR1C3	padj<0.05 & Upregulated
0.806484	3.1543	3.30901	0.953246	0.340465	0.4705	AKR1C4	N.S.
116.208	6.70036	1.04366	6.42008	1.36198e-10	1.26415e-09	AKR1D1	padj<0.05 & Upregulated
631.484	-0.739021	0.27537	-2.68374	0.00728031	0.0196201	AKR1E2	padj<0.05 & Downregulated
4352.56	-0.191071	0.132774	-1.43907	0.150132	0.249162	AKR7A2	N.S.
55.4994	-0.113384	0.287284	-0.394675	0.693083	0.784489	AKR7A3	N.S.
12219.6	0.126142	0.0878729	1.4355	0.151143	0.250411	AKT1	N.S.
10177.8	0.0521346	0.110087	0.473576	0.635803	0.738205	AKT1S1	N.S.
7690.82	-0.0422218	0.150707	-0.280158	0.779357	0.850549	AKT2	N.S.
4957.89	0.296524	0.2016	1.47085	0.141332	0.237176	AKT3	N.S.
2584.93	-0.246764	0.144859	-1.70348	0.0884785	0.162927	AKTIP	N.S.
0.382835	-0.725674	3.52639	-0.205784	0.83696	NA	AL008723.1	N.S.
7.6561	-0.0332967	1.21199	-0.0274728	0.978083	0.986701	AL021546.6	N.S.
0.479969	-1.23253	3.14556	-0.391831	0.695183	NA	AL022578.1	N.S.
14.0149	0.731104	0.530185	1.37896	0.167907	0.272639	AL023806.1	N.S.
0.157233	0.776761	3.53381	0.219808	0.826021	NA	AL023875.1	N.S.
0.120516	-0.665912	3.53381	-0.18844	0.850532	NA	AL049794.1	N.S.
0	NA	NA	NA	NA	NA	AL049872.1	N.S.
5.69537	-1.85354	1.0567	-1.75408	0.079416	0.149114	AL109927.1	N.S.
0.240716	1.4932	3.52645	0.42343	0.671982	NA	AL133335.1	N.S.
0	NA	NA	NA	NA	NA	AL133475.1	N.S.
1.94494	-1.58146	1.69762	-0.931575	0.351556	0.481624	AL135745.1	N.S.
0	NA	NA	NA	NA	NA	AL135842.1	N.S.
13.5045	-0.936127	0.783244	-1.19519	0.232012	0.350147	AL136097.1	N.S.
0	NA	NA	NA	NA	NA	AL137164.1	N.S.
5.59381	-0.938225	0.77211	-1.21514	0.224311	0.341243	AL137860.1	N.S.
0	NA	NA	NA	NA	NA	AL138706.2	N.S.
0	NA	NA	NA	NA	NA	AL138751.1	N.S.
0	NA	NA	NA	NA	NA	AL139333.1	N.S.
0	NA	NA	NA	NA	NA	AL158839.1	N.S.
0	NA	NA	NA	NA	NA	AL162426.1	N.S.
257.622	-0.402012	0.185181	-2.17091	0.0299378	0.0659562	AL354822.1	N.S.
0	NA	NA	NA	NA	NA	AL354828.1	N.S.
0	NA	NA	NA	NA	NA	AL354828.2	N.S.
0	NA	NA	NA	NA	NA	AL356131.3	N.S.
0	NA	NA	NA	NA	NA	AL356135.1	N.S.
0.43761	2.25522	3.47372	0.649223	0.516194	NA	AL356289.1	N.S.
1.34312	0.227618	1.58293	0.143796	0.885662	0.925482	AL356585.2	N.S.
1.34312	0.227618	1.58293	0.143796	0.885662	0.925482	AL356585.3	N.S.
0	NA	NA	NA	NA	NA	AL357140.1	N.S.
22.1353	0.831375	0.427465	1.94489	0.0517877	0.104735	AL358852.1	N.S.
0.157233	0.776761	3.53381	0.219808	0.826021	NA	AL360294.1	N.S.
65.2979	0.0604812	0.28768	0.210237	0.833482	0.888915	AL365181.2	N.S.
0	NA	NA	NA	NA	NA	AL365202.1	N.S.
0	NA	NA	NA	NA	NA	AL365273.1	N.S.
0	NA	NA	NA	NA	NA	AL445183.1	N.S.
0	NA	NA	NA	NA	NA	AL513412.1	N.S.
1057.85	0.0429697	0.16513	0.260218	0.794696	0.862053	AL513523.1	N.S.
1055.41	0.0358168	0.164948	0.21714	0.828099	0.884798	AL513523.2	N.S.
2793.28	0.50118	0.126988	3.94667	7.92454e-05	0.000337981	AL589743.1	padj<0.05 & Upregulated
0.982162	1.56886	2.28916	0.685343	0.493127	0.615738	AL590235.1	N.S.
0	NA	NA	NA	NA	NA	AL591806.1	N.S.
87.141	-0.0426574	0.241645	-0.176529	0.859879	0.907736	AL592183.1	N.S.
0	NA	NA	NA	NA	NA	AL596220.1	N.S.
0.231685	1.45717	3.52932	0.412876	0.679698	NA	AL645728.1	N.S.
0	NA	NA	NA	NA	NA	AL645922.1	N.S.
0	NA	NA	NA	NA	NA	AL662852.1	N.S.
45.9482	-1.41502	0.313485	-4.51385	6.36606e-06	3.2695e-05	AL928654.7	padj<0.05 & Downregulated
0	NA	NA	NA	NA	NA	AL929561.1	N.S.
2712.93	0.00181099	0.102517	0.0176653	0.985906	0.991595	ALAD	N.S.
11199.1	0.377492	0.1749	2.15833	0.0309019	0.0677124	ALAS1	N.S.
1.42558	-0.894242	1.5412	-0.580223	0.561764	0.676584	ALAS2	N.S.
1.98086	1.8272	1.32388	1.38018	0.167531	0.27208	ALB	N.S.
90527.3	-0.783968	0.290389	-2.69972	0.00693989	0.0188045	ALCAM	padj<0.05 & Downregulated
1497.13	0.141953	0.169833	0.835841	0.403244	0.532177	ALDH16A1	N.S.
8249.13	-0.396202	0.107983	-3.66913	0.000243373	0.000944607	ALDH18A1	padj<0.05 & Downregulated
75173.5	0.245445	0.236433	1.03811	0.299217	0.427065	ALDH1A1	N.S.
27.3687	2.00444	0.416139	4.81676	1.45904e-06	8.21997e-06	ALDH1A2	padj<0.05 & Upregulated
1792.24	0.754593	0.167008	4.51829	6.23399e-06	3.21208e-05	ALDH1A3	padj<0.05 & Upregulated
4213.6	0.0908948	0.0812475	1.11874	0.263251	0.386876	ALDH1B1	N.S.
12.0284	2.13798	0.803974	2.65926	0.00783119	0.0208852	ALDH1L1	padj<0.05 & Upregulated
2620.61	-0.0338432	0.183294	-0.184639	0.853513	0.90293	ALDH1L2	N.S.
58.6404	0.812193	0.330871	2.45471	0.0140998	0.0347088	ALDH2	padj<0.05 & Upregulated
60.5952	0.557063	0.376922	1.47793	0.139428	0.234727	ALDH3A1	N.S.
4488.92	0.26753	0.115412	2.31805	0.0204464	0.0476408	ALDH3A2	padj<0.05 & Upregulated
2360.12	2.89329	0.232601	12.4388	1.6083e-35	5.86491e-34	ALDH3B1	padj<0.05 & Upregulated
0.635422	-2.75486	2.86581	-0.961287	0.336408	0.465909	ALDH3B2	N.S.
4420.65	0.686524	0.151726	4.52477	6.04599e-06	3.11798e-05	ALDH4A1	padj<0.05 & Upregulated
2978.14	-0.0766862	0.0889472	-0.862154	0.388603	0.518226	ALDH5A1	N.S.
795.387	2.01287	0.300214	6.70479	2.01696e-11	2.02871e-10	ALDH6A1	padj<0.05 & Upregulated
3445.58	-0.681008	0.156328	-4.35628	1.32289e-05	6.4646e-05	ALDH7A1	padj<0.05 & Downregulated
68.0816	0.0535288	0.434944	0.123071	0.902051	0.936433	ALDH8A1	N.S.
5772.71	0.0741676	0.0739361	1.00313	0.315798	0.444355	ALDH9A1	N.S.
101979	0.647956	0.199361	3.25016	0.00115338	0.00381926	ALDOA	padj<0.05 & Upregulated
2.68579	-0.147948	1.29577	-0.114177	0.909097	0.94089	ALDOB	N.S.
88.6781	0.109103	0.311174	0.350616	0.725877	0.809858	ALDOC	N.S.
2499.57	-0.36911	0.0946766	-3.89864	9.67349e-05	0.000406114	ALG1	padj<0.05 & Downregulated
316.962	-0.921565	0.195509	-4.71366	2.43304e-06	1.32573e-05	ALG10	padj<0.05 & Downregulated
854.924	-0.863091	0.144656	-5.96649	2.42406e-09	1.97725e-08	ALG10B	padj<0.05 & Downregulated
718.473	-0.240077	0.183397	-1.30906	0.190514	0.300965	ALG11	N.S.
2734.31	-0.20033	0.123576	-1.62111	0.104995	0.187517	ALG12	N.S.
3317.16	-0.356562	0.100987	-3.53075	0.000414377	0.00152479	ALG13	padj<0.05 & Downregulated
618.672	0.707763	0.178388	3.96754	7.26168e-05	0.000312	ALG14	padj<0.05 & Upregulated
1.45757	-0.147286	1.7653	-0.0834338	0.933507	0.957777	ALG1L	N.S.
2.03061	0.992591	1.51998	0.65303	0.513737	0.634517	ALG1L2	N.S.
4672.19	0.124779	0.123206	1.01277	0.311172	0.439407	ALG2	N.S.
3531.65	-0.0851129	0.153483	-0.554542	0.579208	0.691803	ALG3	N.S.
2555.35	-0.0391992	0.179617	-0.218237	0.827244	0.88421	ALG5	N.S.
1526.84	-0.159034	0.0901107	-1.76487	0.0775849	0.146314	ALG6	N.S.
2787.07	-0.566424	0.136712	-4.14321	3.42485e-05	0.000156402	ALG8	padj<0.05 & Downregulated
1591.06	0.0470328	0.190352	0.247084	0.804843	0.869158	ALG9	N.S.
6.69422	3.29859	1.00711	3.2753	0.00105549	0.00352254	ALK	padj<0.05 & Upregulated
1341.91	-0.024031	0.104674	-0.229579	0.818419	0.877737	ALKBH1	N.S.
2657.39	-0.963241	0.116604	-8.26078	1.44729e-16	2.15253e-15	ALKBH2	padj<0.05 & Downregulated
1407.3	0.126881	0.157765	0.804242	0.421257	0.549539	ALKBH3	N.S.
1702.26	-0.561492	0.145672	-3.85451	0.000115962	0.000479671	ALKBH4	padj<0.05 & Downregulated
9182.31	0.0919845	0.116812	0.787458	0.431014	0.558712	ALKBH5	N.S.
999.543	0.00700231	0.120158	0.0582759	0.953529	0.970882	ALKBH6	N.S.
2569.88	-0.0238729	0.160553	-0.148691	0.881797	0.922495	ALKBH7	N.S.
1119.43	-0.233333	0.114345	-2.04061	0.0412896	0.0864145	ALKBH8	N.S.
0.355377	0.764228	3.42326	0.223245	0.823345	NA	ALLC	N.S.
1442.83	0.214514	0.158129	1.35658	0.174914	0.281293	ALMS1	N.S.
19.2683	-0.497763	0.497866	-0.999793	0.317411	0.446121	ALOX12	N.S.
122.232	-0.559471	0.22234	-2.51629	0.0118598	0.029926	ALOX12B	padj<0.05 & Downregulated
5.65795	-0.465428	1.01251	-0.459678	0.645748	0.746217	ALOX15	N.S.
0.984512	-0.593054	1.78532	-0.332183	0.739751	0.820461	ALOX15B	N.S.
10.0423	6.78938	1.26259	5.37735	7.55912e-08	5.09722e-07	ALOX5	padj<0.05 & Upregulated
3.38481	5.21666	1.5213	3.42908	0.00060562	0.00215264	ALOX5AP	padj<0.05 & Upregulated
97.4591	1.99627	0.323547	6.16994	6.83143e-10	5.93612e-09	ALOXE3	padj<0.05 & Upregulated
0.728041	2.11404	2.7988	0.755338	0.450046	0.576566	ALPI	N.S.
180.729	3.19496	0.372648	8.57367	1.00234e-17	1.61031e-16	ALPK1	padj<0.05 & Upregulated
403.824	6.61959	0.356172	18.5854	4.22046e-77	4.10988e-75	ALPK2	padj<0.05 & Upregulated
66.2065	1.05057	0.580459	1.8099	0.0703116	0.134844	ALPK3	N.S.
1990.98	2.5375	0.250218	10.1412	3.62688e-24	8.21041e-23	ALPL	padj<0.05 & Upregulated
70.2786	6.72142	0.717419	9.3689	7.32938e-21	1.40858e-19	ALPP	padj<0.05 & Upregulated
15.1307	4.02421	0.808852	4.97521	6.51753e-07	3.86156e-06	ALPPL2	padj<0.05 & Upregulated
4614.16	-0.188133	0.114966	-1.63642	0.101751	0.182641	ALS2	N.S.
5543.87	1.93218	0.184833	10.4537	1.40979e-25	3.43694e-24	ALS2CL	padj<0.05 & Upregulated
1.71539	1.23488	1.507	0.819428	0.412542	0.540923	ALS2CR11	N.S.
10.1536	0.171057	0.741407	0.230719	0.817533	0.877165	ALS2CR12	N.S.
1.93906	-1.14315	1.2723	-0.898485	0.368927	0.499051	ALX1	N.S.
1.52475	1.01479	1.79034	0.566815	0.57084	0.684435	ALX3	N.S.
288.523	-0.543466	0.267646	-2.03054	0.0423016	0.088276	ALX4	N.S.
8600.53	-0.639301	0.0746163	-8.56785	1.05434e-17	1.68763e-16	ALYREF	padj<0.05 & Downregulated
1131.02	-0.348	0.176297	-1.97394	0.0483883	0.098916	AMACR	N.S.
187.662	1.5033	0.537077	2.79904	0.00512551	0.0143823	AMBN	padj<0.05 & Upregulated
1.71827	4.24537	2.17241	1.95422	0.0506754	0.102891	AMBP	N.S.
4049.4	0.125767	0.0848532	1.48217	0.138295	0.23323	AMBRA1	N.S.
7124.14	0.185692	0.146415	1.26826	0.204706	0.318982	AMD1	N.S.
134.519	-0.702267	0.308522	-2.27623	0.0228321	0.0524079	AMDHD1	N.S.
1679.46	-0.32185	0.225525	-1.42712	0.153546	0.253933	AMDHD2	N.S.
2.99069	-0.183346	1.02189	-0.179418	0.857609	0.906116	AMELX	N.S.
0	NA	NA	NA	NA	NA	AMELY	N.S.
889.567	-0.468079	0.149653	-3.12777	0.00176137	0.00556619	AMER1	padj<0.05 & Downregulated
0.241677	-1.39291	3.53047	-0.394541	0.693182	NA	AMER2	N.S.
1.38436	-2.52254	1.87263	-1.34705	0.177963	0.285013	AMER3	N.S.
8752.5	0.327295	0.104317	3.1375	0.00170398	0.00541415	AMFR	padj<0.05 & Upregulated
640.194	0.0875587	0.206469	0.424077	0.67151	0.767144	AMH	N.S.
2.68602	0.866739	1.52139	0.569703	0.568879	0.682741	AMHR2	N.S.
1105.23	0.00227081	0.213351	0.0106435	0.991508	0.995047	AMIGO1	N.S.
6179.33	0.685053	0.149457	4.58361	4.57027e-06	2.39664e-05	AMIGO2	padj<0.05 & Upregulated
157.724	0.53065	0.426246	1.24494	0.213154	0.32863	AMIGO3	N.S.
1242.84	-0.214653	0.1204	-1.78283	0.0746134	0.141803	AMMECR1	N.S.
6035.07	0.107881	0.127799	0.844147	0.398587	0.527826	AMMECR1L	N.S.
39.6473	0.0970715	0.403809	0.24039	0.810028	0.872442	AMN	N.S.
921.655	-0.143442	0.129177	-1.11043	0.266814	0.390952	AMN1	N.S.
479.924	-0.362508	0.234704	-1.54453	0.12246	0.211976	AMOT	N.S.
3054.47	0.626757	0.184206	3.40249	0.00066776	0.00234388	AMOTL1	padj<0.05 & Upregulated
14200.3	1.44012	0.1499	9.60725	7.4511e-22	1.49977e-20	AMOTL2	padj<0.05 & Upregulated
0.706091	-0.91869	2.9005	-0.316735	0.751444	0.829067	AMPD1	N.S.
5178.35	-0.255403	0.0940704	-2.71502	0.0066271	0.0180608	AMPD2	padj<0.05 & Downregulated
52.5079	2.20234	0.388158	5.67381	1.39659e-08	1.04346e-07	AMPD3	padj<0.05 & Upregulated
34.3342	-0.37033	0.397509	-0.931628	0.351529	0.481624	AMPH	N.S.
546.329	-0.228102	0.240078	-0.950116	0.342053	0.472253	AMT	N.S.
187.837	10.2288	1.11088	9.20789	3.32608e-20	6.17432e-19	AMTN	padj<0.05 & Upregulated
0.389347	-0.814622	3.35129	-0.243077	0.807946	NA	AMY1A	N.S.
1.04694	-0.596074	1.89925	-0.313847	0.753637	0.831118	AMY1B	N.S.
0.707187	-2.91884	3.42238	-0.852868	0.393733	0.523346	AMY1C	N.S.
0.238784	0.0561355	3.53381	0.0158853	0.987326	NA	AMY2A	N.S.
540.731	-0.908483	0.172926	-5.2536	1.49153e-07	9.68298e-07	AMY2B	padj<0.05 & Downregulated
2.14973	0.673597	1.76421	0.381812	0.702601	0.791789	AMZ1	N.S.
8018.69	-0.369315	0.080212	-4.60423	4.13991e-06	2.19073e-05	AMZ2	padj<0.05 & Downregulated
5249.58	-0.347343	0.134965	-2.57358	0.0100652	0.0259997	ANAPC1	padj<0.05 & Downregulated
979.983	-0.0323372	0.122528	-0.263917	0.791844	0.859656	ANAPC10	N.S.
6920.48	0.212093	0.139131	1.52441	0.127407	0.218628	ANAPC11	N.S.
2117.81	0.714338	0.154862	4.61275	3.97374e-06	2.11049e-05	ANAPC13	padj<0.05 & Upregulated
2118.43	-0.240936	0.195063	-1.23517	0.216768	0.333081	ANAPC15	N.S.
6724.69	0.460901	0.160289	2.87544	0.00403461	0.0116109	ANAPC16	padj<0.05 & Upregulated
3137.8	-0.0774299	0.135365	-0.572009	0.567316	0.681522	ANAPC2	N.S.
2257.43	-0.27005	0.087929	-3.07122	0.00213183	0.00660847	ANAPC4	padj<0.05 & Downregulated
9693.4	-0.235966	0.0946278	-2.49362	0.0126447	0.0316273	ANAPC5	padj<0.05 & Downregulated
5681.88	-0.107136	0.102107	-1.04925	0.294063	0.421497	ANAPC7	N.S.
1622.74	-1.72873	0.166932	-10.3559	3.93454e-25	9.34374e-24	ANG	padj<0.05 & Downregulated
2186.34	-0.100561	0.191283	-0.525716	0.599086	0.708313	ANGEL1	N.S.
2239.91	-0.000805871	0.104239	-0.007731	0.993832	0.996048	ANGEL2	N.S.
2284.75	-1.13227	0.203495	-5.5641	2.6351e-08	1.8949e-07	ANGPT1	padj<0.05 & Downregulated
17.9399	0.132641	0.422825	0.313701	0.753748	0.831139	ANGPT2	N.S.
4.64803	4.1627	1.26308	3.29567	0.000981871	0.0033066	ANGPT4	padj<0.05 & Upregulated
81.3091	-2.87875	0.594935	-4.83876	1.30651e-06	7.41333e-06	ANGPTL1	padj<0.05 & Downregulated
7.89555	3.0519	0.931908	3.27489	0.00105703	0.00352565	ANGPTL2	padj<0.05 & Upregulated
1.20975	-0.795341	2.08982	-0.380578	0.703516	0.792285	ANGPTL3	N.S.
11711.4	2.32398	0.295247	7.87131	3.50957e-15	4.79806e-14	ANGPTL4	padj<0.05 & Upregulated
0.604174	-1.65623	2.47287	-0.669761	0.50301	0.624811	ANGPTL5	N.S.
31.9989	0.0703049	0.308643	0.227787	0.819812	0.878852	ANGPTL6	N.S.
140.773	4.92477	0.532878	9.24184	2.42288e-20	4.53146e-19	ANGPTL7	padj<0.05 & Upregulated
2.47482	-0.98866	1.24949	-0.791248	0.428799	0.556628	ANGPTL8	N.S.
0.121161	-0.665912	3.53381	-0.18844	0.850532	NA	ANHX	N.S.
543.549	1.69446	0.185604	9.12944	6.88564e-20	1.25679e-18	ANK1	padj<0.05 & Upregulated
1134.53	0.307758	0.247137	1.24529	0.213024	0.328516	ANK2	N.S.
3156.26	-1.03714	0.203723	-5.09094	3.56294e-07	2.1961e-06	ANK3	padj<0.05 & Downregulated
151.892	-0.00807801	0.261635	-0.0308751	0.975369	0.984804	ANKAR	N.S.
458.711	-1.03894	0.161851	-6.41911	1.37072e-10	1.27158e-09	ANKDD1A	padj<0.05 & Downregulated
4.44774	2.03169	0.939854	2.16171	0.0306404	0.0672408	ANKDD1B	N.S.
710.145	-0.413669	0.232815	-1.77681	0.0755994	0.143365	ANKEF1	N.S.
2.7475	0.121002	1.3239	0.0913985	0.927176	0.953712	ANKFN1	N.S.
7617.78	0.379726	0.088062	4.31203	1.61764e-05	7.76137e-05	ANKFY1	padj<0.05 & Upregulated
2416.6	0.603025	0.119776	5.0346	4.78847e-07	2.89718e-06	ANKH	padj<0.05 & Upregulated
4271.82	0.080247	0.0807469	0.993809	0.320316	0.448973	ANKHD1	N.S.
3367.12	0.326135	0.113464	2.87434	0.0040487	0.0116431	ANKHD1-EIF4EBP3	padj<0.05 & Upregulated
5884.76	0.438311	0.102203	4.28864	1.79774e-05	8.55484e-05	ANKIB1	padj<0.05 & Upregulated
17.0981	0.366585	0.461428	0.794459	0.426928	0.554406	ANKK1	N.S.
124.561	0.396942	0.333993	1.18847	0.234647	0.353146	ANKLE1	N.S.
10133.6	0.811625	0.0963855	8.42061	3.74533e-17	5.79794e-16	ANKLE2	padj<0.05 & Upregulated
543.584	0.0358558	0.148958	0.240711	0.809779	0.872241	ANKMY1	N.S.
1889.84	0.479893	0.129992	3.69172	0.000222747	0.000871733	ANKMY2	padj<0.05 & Upregulated
1186.35	0.416104	0.138316	3.00836	0.00262661	0.00793354	ANKRA2	padj<0.05 & Upregulated
102268	0.279068	0.196967	1.41683	0.156533	0.257602	ANKRD1	N.S.
4507.42	1.52297	0.195545	7.78831	6.79127e-15	9.09905e-14	ANKRD10	padj<0.05 & Upregulated
10919.2	0.585206	0.12402	4.71865	2.37413e-06	1.29485e-05	ANKRD11	padj<0.05 & Upregulated
1995.42	-0.177511	0.154668	-1.14769	0.251098	0.372629	ANKRD12	N.S.
2846.3	0.601649	0.0909955	6.61185	3.79547e-11	3.67958e-10	ANKRD13A	padj<0.05 & Upregulated
5485.08	-1.31416	0.201101	-6.53483	6.36808e-11	6.03928e-10	ANKRD13B	padj<0.05 & Downregulated
2789.68	0.061188	0.107035	0.571665	0.567549	0.681622	ANKRD13C	N.S.
2301.83	-0.0459123	0.123352	-0.372206	0.70974	0.796874	ANKRD13D	N.S.
712.283	-0.813219	0.160261	-5.07432	3.88877e-07	2.38596e-06	ANKRD16	padj<0.05 & Downregulated
8419.98	0.237286	0.151272	1.5686	0.11674	0.203959	ANKRD17	N.S.
314.693	0.39976	0.214367	1.86484	0.0622035	0.121787	ANKRD18A	N.S.
139.479	-0.237974	0.391714	-0.607519	0.543507	0.660614	ANKRD18B	N.S.
282.794	5.45236	0.415649	13.1177	2.60758e-39	1.072e-37	ANKRD2	padj<0.05 & Upregulated
17.7598	1.84343	0.62558	2.94675	0.00321128	0.00948421	ANKRD20A1	padj<0.05 & Upregulated
17.1414	0.28866	0.561843	0.513773	0.607411	0.715681	ANKRD20A2	N.S.
7.78342	0.117774	1.04489	0.112714	0.910257	0.94157	ANKRD20A3	N.S.
44.8577	0.153363	0.265326	0.578017	0.563253	0.677855	ANKRD20A4	N.S.
0.601205	-2.57929	3.45979	-0.745506	0.455966	0.582224	ANKRD22	N.S.
170.788	-0.397455	0.191449	-2.07604	0.0378902	0.0803191	ANKRD23	N.S.
811.126	-0.951865	0.312578	-3.04521	0.00232522	0.00713069	ANKRD24	padj<0.05 & Downregulated
1071.83	0.0427662	0.113831	0.375698	0.707141	0.79493	ANKRD26	N.S.
3298.16	-0.34429	0.156931	-2.1939	0.0282424	0.0627366	ANKRD27	N.S.
3704.21	0.127026	0.137082	0.926645	0.354111	0.484422	ANKRD28	N.S.
263.003	0.313937	0.135225	2.32159	0.0202552	0.047246	ANKRD29	padj<0.05 & Upregulated
2.59787	-3.98226	1.8884	-2.1088	0.0349621	0.075065	ANKRD30A	N.S.
22.9509	3.89218	0.795228	4.89442	9.85954e-07	5.70969e-06	ANKRD30B	padj<0.05 & Upregulated
0.132922	-0.665912	3.53381	-0.18844	0.850532	NA	ANKRD30BL	N.S.
52.84	-0.282118	0.373252	-0.755838	0.449746	0.576351	ANKRD31	N.S.
0.6856	-1.34667	2.92092	-0.461044	0.644767	0.745365	ANKRD33	N.S.
2425.42	1.30133	0.196884	6.60965	3.85242e-11	3.73271e-10	ANKRD33B	padj<0.05 & Upregulated
295.751	-0.781029	0.306935	-2.54461	0.0109401	0.0279737	ANKRD34A	padj<0.05 & Downregulated
973.493	-1.8659	0.220787	-8.45111	2.88557e-17	4.50299e-16	ANKRD34B	padj<0.05 & Downregulated
8.39862	5.04534	1.30121	3.87743	0.000105568	0.000439911	ANKRD34C	padj<0.05 & Upregulated
3.38513	0.8334	1.04524	0.797326	0.425262	0.553024	ANKRD35	N.S.
203.907	-0.493727	0.212584	-2.3225	0.0202058	0.0471622	ANKRD36	padj<0.05 & Downregulated
246.477	-0.30758	0.264137	-1.16447	0.244233	0.364769	ANKRD36B	N.S.
112.486	0.0914365	0.205263	0.445459	0.655988	0.754306	ANKRD36C	N.S.
364.023	0.336457	0.173359	1.9408	0.0522821	0.105527	ANKRD37	N.S.
1562.82	-0.563969	0.104395	-5.40224	6.58136e-08	4.48124e-07	ANKRD39	padj<0.05 & Downregulated
5171.5	0.0160981	0.0953577	0.168818	0.86594	0.91191	ANKRD40	N.S.
1073.79	0.256984	0.0997513	2.57625	0.00998795	0.0258308	ANKRD42	padj<0.05 & Upregulated
1227.61	-0.815519	0.228077	-3.57563	0.000349384	0.00130745	ANKRD44	padj<0.05 & Downregulated
4.32764	1.7043	1.06552	1.59951	0.109708	0.193987	ANKRD45	N.S.
1151.66	0.137391	0.120387	1.14125	0.253766	0.375883	ANKRD46	N.S.
1212.24	0.0115643	0.114449	0.101043	0.919516	0.948162	ANKRD49	N.S.
2449.7	-0.442758	0.177144	-2.49943	0.0124394	0.0312257	ANKRD50	padj<0.05 & Downregulated
8245.62	0.372174	0.0668115	5.5705	2.54002e-08	1.83182e-07	ANKRD52	padj<0.05 & Upregulated
2.783	0.427029	1.41331	0.302148	0.762539	0.836911	ANKRD53	N.S.
2795.1	-0.174393	0.112418	-1.55129	0.120832	0.209723	ANKRD54	N.S.
0.120516	-0.665912	3.53381	-0.18844	0.850532	NA	ANKRD55	N.S.
1623.24	-0.153823	0.198714	-0.774091	0.438877	0.565955	ANKRD6	N.S.
0	NA	NA	NA	NA	NA	ANKRD60	N.S.
6.96284	0.248021	0.663288	0.373927	0.708459	0.795846	ANKRD61	N.S.
1.45362	3.13928	2.00972	1.56205	0.118277	0.206024	ANKRD62	N.S.
1.81397	-0.70219	1.47215	-0.476984	0.633374	0.736023	ANKRD63	N.S.
17.6581	-0.0606377	0.512392	-0.118342	0.905796	0.938868	ANKRD65	N.S.
0	NA	NA	NA	NA	NA	ANKRD66	N.S.
13.5993	-0.519493	0.694298	-0.748227	0.454323	0.580574	ANKRD7	N.S.
3368.88	0.369604	0.156048	2.36853	0.017859	0.0424171	ANKRD9	padj<0.05 & Upregulated
3037.09	0.379082	0.0908845	4.17103	3.03228e-05	0.00013935	ANKS1A	padj<0.05 & Upregulated
300.745	-0.73526	0.242332	-3.03411	0.00241249	0.00736759	ANKS1B	padj<0.05 & Downregulated
1370.32	0.143782	0.111466	1.28992	0.19708	0.309347	ANKS3	N.S.
0.396149	2.12566	3.27526	0.649007	0.516334	NA	ANKS4B	N.S.
4311.45	0.090611	0.10746	0.843204	0.399115	0.528364	ANKS6	N.S.
5.80539	2.81358	0.963049	2.92153	0.00348311	0.0101955	ANKUB1	padj<0.05 & Upregulated
4323.28	1.22999	0.176856	6.95475	3.53193e-12	3.81918e-11	ANKZF1	padj<0.05 & Upregulated
5040.51	-0.981577	0.135133	-7.26377	3.76447e-13	4.3804e-12	ANLN	padj<0.05 & Downregulated
57.9186	4.79985	0.563017	8.52523	1.52505e-17	2.4079e-16	ANO1	padj<0.05 & Upregulated
2966.6	-0.177748	0.0932919	-1.90529	0.056742	0.112869	ANO10	N.S.
55.8134	6.78814	0.91043	7.45597	8.92069e-14	1.09969e-12	ANO2	padj<0.05 & Upregulated
5.51621	1.26037	0.89478	1.40858	0.158958	0.260854	ANO3	N.S.
26.0628	3.74638	0.680495	5.50538	3.68373e-08	2.5923e-07	ANO4	padj<0.05 & Upregulated
87.6089	-0.604074	0.20679	-2.9212	0.00348686	0.0102047	ANO5	padj<0.05 & Downregulated
9875.87	0.614393	0.110118	5.5794	2.41348e-08	1.74417e-07	ANO6	padj<0.05 & Upregulated
192.275	-0.304959	0.270645	-1.12679	0.259832	0.382852	ANO7	N.S.
2845.82	-0.943091	0.126125	-7.47742	7.57935e-14	9.46387e-13	ANO8	padj<0.05 & Downregulated
32.3422	2.0942	0.626572	3.34231	0.000830834	0.00285016	ANO9	padj<0.05 & Upregulated
2179.77	-0.966652	0.228549	-4.22952	2.34191e-05	0.000109442	ANOS1	padj<0.05 & Downregulated
10204.4	-0.64133	0.108183	-5.92818	3.06307e-09	2.4673e-08	ANP32A	padj<0.05 & Downregulated
10862.7	-0.123366	0.082151	-1.5017	0.133174	0.226312	ANP32B	N.S.
0.515394	-1.22063	2.58117	-0.472898	0.636286	NA	ANP32D	N.S.
5837.91	-0.49726	0.119207	-4.17139	3.02749e-05	0.000139167	ANP32E	padj<0.05 & Downregulated
7.03791	1.07387	0.709212	1.51418	0.12998	0.222061	ANPEP	N.S.
4983.16	0.671875	0.174476	3.85082	0.000117725	0.000485927	ANTXR1	padj<0.05 & Upregulated
11290	-0.575443	0.1771	-3.24926	0.00115707	0.00382928	ANTXR2	padj<0.05 & Downregulated
56.2915	5.32956	0.71032	7.50304	6.23565e-14	7.85926e-13	ANTXRL	padj<0.05 & Upregulated
21908.8	2.64485	0.309286	8.55147	1.21535e-17	1.93468e-16	ANXA1	padj<0.05 & Upregulated
18.7711	6.26504	1.20595	5.19512	2.04583e-07	1.30578e-06	ANXA10	padj<0.05 & Upregulated
16620.4	0.68667	0.227106	3.02357	0.00249811	0.00759144	ANXA11	padj<0.05 & Upregulated
51.1583	7.69438	1.15517	6.66083	2.72285e-11	2.69212e-10	ANXA13	padj<0.05 & Upregulated
191344	1.47122	0.194178	7.57664	3.54624e-14	4.56533e-13	ANXA2	padj<0.05 & Upregulated
932.469	-2.02316	0.155011	-13.0517	6.21854e-39	2.5326e-37	ANXA2R	padj<0.05 & Downregulated
4258.52	8.0552	0.354152	22.745	1.60698e-114	2.88776e-112	ANXA3	padj<0.05 & Upregulated
11932.6	1.09108	0.124439	8.76799	1.81882e-18	3.03968e-17	ANXA4	padj<0.05 & Upregulated
37373.6	1.47104	0.177194	8.30185	1.02499e-16	1.53889e-15	ANXA5	padj<0.05 & Upregulated
7270.04	-0.367459	0.222855	-1.64887	0.0991748	0.178845	ANXA6	N.S.
9088.75	0.135054	0.0793551	1.7019	0.0887746	0.163359	ANXA7	N.S.
684.241	8.04318	0.36846	21.8292	1.22606e-105	1.94286e-103	ANXA8	padj<0.05 & Upregulated
555.895	5.86353	0.247435	23.6973	3.84451e-124	8.3767e-122	ANXA8L1	padj<0.05 & Upregulated
241.801	-0.369605	0.247692	-1.4922	0.135648	0.229861	ANXA9	N.S.
31.5197	3.99591	0.542727	7.36264	1.80304e-13	2.16452e-12	AOAH	padj<0.05 & Upregulated
44.1594	6.18206	0.742968	8.32076	8.74013e-17	1.31904e-15	AOC1	padj<0.05 & Upregulated
804.938	0.817886	0.171846	4.75941	1.94157e-06	1.071e-05	AOC2	padj<0.05 & Upregulated
379.356	0.781271	0.323064	2.41832	0.0155924	0.0378013	AOC3	padj<0.05 & Upregulated
553.917	7.57099	0.648741	11.6703	1.80844e-31	5.56943e-30	AOX1	padj<0.05 & Upregulated
90.2294	0.558064	0.554145	1.00707	0.3139	0.442578	AP000275.65	N.S.
10.3513	1.471	1.15665	1.27178	0.203453	0.317435	AP000295.9	N.S.
0.946004	1.57659	2.20752	0.71419	0.475109	0.599554	AP000304.12	N.S.
3.47278	5.26086	1.40749	3.73776	0.000185664	0.000738208	AP000322.53	padj<0.05 & Upregulated
33.4867	0.298544	0.94194	0.316946	0.751285	0.829048	AP000349.1	N.S.
33.4867	0.298544	0.94194	0.316946	0.751285	0.829048	AP000349.2	N.S.
49.6183	-0.479146	0.508408	-0.942443	0.345966	0.476376	AP000350.10	N.S.
0	NA	NA	NA	NA	NA	AP000351.1	N.S.
3.57408	0.316955	0.895344	0.354004	0.723336	0.808132	AP000687.1	N.S.
7.97224	0.122448	0.609572	0.200876	0.840796	0.894105	AP000721.4	N.S.
151.592	2.37846	1.34555	1.76765	0.07712	0.145579	AP000769.1	N.S.
6.72078	-0.511758	0.715975	-0.714771	0.474751	0.599244	AP000866.1	N.S.
0	NA	NA	NA	NA	NA	AP001888.1	N.S.
2.21301	-0.935834	1.66116	-0.563363	0.573188	0.686549	AP002884.2	N.S.
0	NA	NA	NA	NA	NA	AP002962.1	N.S.
1373.14	0.834256	0.215336	3.8742	0.000106974	0.000445238	AP003419.11	padj<0.05 & Upregulated
0	NA	NA	NA	NA	NA	AP005242.1	N.S.
60.1161	0.41297	0.311091	1.32749	0.184346	0.293345	AP006285.1	N.S.
60.1161	0.41297	0.311091	1.32749	0.184346	0.293345	AP006285.2	N.S.
2910.37	-0.100457	0.137565	-0.730253	0.465236	0.590737	AP1AR	N.S.
10586.6	0.0269708	0.0985453	0.273689	0.784324	0.854646	AP1B1	N.S.
8808.37	-0.0197937	0.151577	-0.130585	0.896104	0.93198	AP1G1	N.S.
2235.36	0.819336	0.218213	3.75475	0.000173515	0.000694497	AP1G2	padj<0.05 & Upregulated
6974.02	0.109883	0.114848	0.956777	0.33868	0.468497	AP1M1	N.S.
1435.6	0.303287	0.16414	1.84773	0.0646409	0.125754	AP1M2	N.S.
8197.63	0.250746	0.0839086	2.98833	0.00280506	0.00841422	AP1S1	padj<0.05 & Upregulated
7667.43	-0.272064	0.150609	-1.80643	0.0708516	0.135686	AP1S2	N.S.
957.397	0.271554	0.202186	1.34309	0.179241	0.286585	AP1S3	N.S.
10489.8	0.517402	0.140119	3.69258	0.000221988	0.000869535	AP2A1	padj<0.05 & Upregulated
9722.66	-0.0162264	0.0720399	-0.225241	0.821792	0.880325	AP2A2	N.S.
28699.3	-0.00689978	0.0838466	-0.0822905	0.934416	0.958275	AP2B1	N.S.
33762.1	0.378191	0.113598	3.32921	0.000870914	0.00296966	AP2M1	padj<0.05 & Upregulated
10015.2	0.0269815	0.179528	0.150291	0.880535	0.921506	AP2S1	N.S.
6677.16	-0.0887183	0.11772	-0.753641	0.451065	0.577616	AP3B1	N.S.
635.783	1.23547	0.28533	4.32999	1.49117e-05	7.20418e-05	AP3B2	padj<0.05 & Upregulated
20631.2	0.0251444	0.0700352	0.359025	0.719577	0.805334	AP3D1	N.S.
5690.84	-0.110038	0.122703	-0.896786	0.369833	0.499792	AP3M1	N.S.
2060.3	-0.00480845	0.0806298	-0.0596362	0.952445	0.970087	AP3M2	N.S.
5963.32	0.418303	0.13497	3.09923	0.00194023	0.00606641	AP3S1	padj<0.05 & Upregulated
2866.39	-0.0210107	0.172056	-0.122115	0.902808	0.936772	AP3S2	N.S.
1437.16	-0.406684	0.0972589	-4.18146	2.89649e-05	0.000133356	AP4B1	padj<0.05 & Downregulated
1733.94	0.238325	0.1747	1.36419	0.172507	0.278299	AP4E1	N.S.
1691.25	-0.761822	0.190332	-4.0026	6.26506e-05	0.000272335	AP4M1	padj<0.05 & Downregulated
811.321	-0.115482	0.106482	-1.08453	0.278132	0.403505	AP4S1	N.S.
3420.91	-0.505796	0.181039	-2.79386	0.00520835	0.0145842	AP5B1	padj<0.05 & Downregulated
2716.85	0.022397	0.1261	0.177613	0.859027	0.907223	AP5M1	N.S.
1238.22	0.298977	0.0922526	3.24085	0.00119174	0.0039321	AP5S1	padj<0.05 & Upregulated
5165.81	0.221017	0.131603	1.67942	0.0930694	0.169879	AP5Z1	N.S.
2689.07	-0.590757	0.132224	-4.46784	7.9015e-06	4.00148e-05	APAF1	padj<0.05 & Downregulated
474.552	0.55653	0.184445	3.01733	0.00255015	0.00772669	APBA1	padj<0.05 & Upregulated
3611.47	-0.216287	0.145135	-1.49025	0.136159	0.230627	APBA2	N.S.
1834.34	0.203756	0.135343	1.50548	0.1322	0.225081	APBA3	N.S.
4166.75	0.252098	0.157057	1.60513	0.108464	0.192353	APBB1	N.S.
0	NA	NA	NA	NA	NA	APBB1IP	N.S.
14278.5	-0.261612	0.130672	-2.00205	0.0452789	0.0934584	APBB2	N.S.
919.425	-0.562966	0.21411	-2.62933	0.00855521	0.0225425	APBB3	padj<0.05 & Downregulated
4020.47	-0.324904	0.163283	-1.98982	0.0466108	0.0957766	APC	N.S.
810.651	-1.11012	0.301982	-3.67611	0.000236822	0.00092226	APC2	padj<0.05 & Downregulated
2.84674	0.0664909	1.13932	0.0583603	0.953462	0.970882	APCDD1	N.S.
11.4187	6.9811	1.21229	5.75858	8.48249e-09	6.50212e-08	APCDD1L	padj<0.05 & Upregulated
0.992162	3.44235	2.54661	1.35174	0.176459	0.283097	APCS	N.S.
8179.91	-0.146835	0.151362	-0.970096	0.331998	0.461378	APEH	N.S.
11.0426	-1.43528	0.569975	-2.51815	0.0117973	0.0297942	APELA	padj<0.05 & Downregulated
15393.7	-0.4285	0.0959817	-4.46439	8.02958e-06	4.06281e-05	APEX1	padj<0.05 & Downregulated
2212.05	-0.229638	0.077246	-2.97282	0.00295081	0.00880745	APEX2	padj<0.05 & Downregulated
16291.1	-0.138682	0.140561	-0.986632	0.323823	0.452579	APH1A	N.S.
2539.95	-0.956116	0.103969	-9.19615	3.71016e-20	6.85809e-19	APH1B	padj<0.05 & Downregulated
10841.8	-0.0529744	0.114389	-0.463107	0.643288	0.744434	API5	N.S.
1302.13	-0.00455523	0.128563	-0.0354318	0.971735	0.982444	APIP	N.S.
865.895	-0.530594	0.120341	-4.40908	1.03812e-05	5.14224e-05	APITD1	padj<0.05 & Downregulated
87.6965	-0.42165	0.327671	-1.28681	0.19816	0.310791	APITD1-CORT	N.S.
389.444	0.210336	0.2909	0.723054	0.469647	0.594295	APLF	N.S.
14.686	0.472242	0.522694	0.903478	0.366272	0.496539	APLN	N.S.
57.5307	4.57116	0.459017	9.95859	2.31322e-23	5.05284e-22	APLNR	padj<0.05 & Upregulated
14175.4	-1.07564	0.1474	-7.29743	2.9331e-13	3.45686e-12	APLP1	padj<0.05 & Downregulated
64555.4	0.333461	0.107293	3.10796	0.00188386	0.00591667	APLP2	padj<0.05 & Upregulated
10121.2	-0.0836006	0.0928314	-0.900563	0.36782	0.498028	APMAP	N.S.
2513.79	7.73622	0.274033	28.231	2.43875e-175	1.37129e-172	APOA1	padj<0.05 & Upregulated
9478.72	-0.469724	0.122725	-3.82744	0.000129481	0.000529683	APOA1BP	padj<0.05 & Downregulated
7.85379	-0.369355	0.609592	-0.605904	0.544578	0.661613	APOA2	N.S.
0	NA	NA	NA	NA	NA	APOA4	N.S.
1.13993	-0.305643	1.90182	-0.160711	0.872321	0.915907	APOA5	N.S.
0.467105	-1.18602	3.48906	-0.339925	0.733913	NA	APOB	N.S.
0.347528	1.96332	3.49362	0.561975	0.574133	NA	APOBEC1	N.S.
3.99796	1.57965	1.05598	1.49591	0.134678	0.228563	APOBEC2	N.S.
0.39076	2.10806	3.28579	0.641568	0.521154	NA	APOBEC3A	N.S.
218.078	3.64595	0.193024	18.8887	1.41415e-79	1.45e-77	APOBEC3B	padj<0.05 & Upregulated
1057.82	1.63181	0.19007	8.58533	9.05793e-18	1.46193e-16	APOBEC3C	padj<0.05 & Upregulated
14.4628	0.766932	0.696111	1.10174	0.270576	0.395075	APOBEC3D	N.S.
638.476	0.387245	0.101825	3.80305	0.000142928	0.000580471	APOBEC3F	padj<0.05 & Upregulated
35.6396	2.48783	0.463253	5.37034	7.85872e-08	5.28901e-07	APOBEC3G	padj<0.05 & Upregulated
72.1372	3.96311	0.449275	8.82111	1.13328e-18	1.91788e-17	APOBEC3H	padj<0.05 & Upregulated
0	NA	NA	NA	NA	NA	APOBEC4	N.S.
36.9067	0.25496	0.307128	0.830142	0.406458	0.535038	APOBR	N.S.
912.192	-1.74863	0.194619	-8.98489	2.5899e-19	4.56005e-18	APOC1	padj<0.05 & Downregulated
0	NA	NA	NA	NA	NA	APOC2	N.S.
4.6493	4.25552	1.311	3.24601	0.00117033	0.00387023	APOC3	padj<0.05 & Upregulated
0.249301	-1.38184	3.53153	-0.391287	0.695585	NA	APOC4	N.S.
0.385945	-2.03328	3.48034	-0.584217	0.559074	NA	APOC4-APOC2	N.S.
15.3892	5.96804	1.11962	5.33044	9.79769e-08	6.4912e-07	APOD	padj<0.05 & Upregulated
23843.7	-1.36121	0.226447	-6.01115	1.84209e-09	1.5225e-08	APOE	padj<0.05 & Downregulated
0.24357	0.0550899	3.53381	0.0155894	0.987562	NA	APOF	N.S.
0	NA	NA	NA	NA	NA	APOH	N.S.
2215.46	5.96719	0.329687	18.0996	3.21115e-73	2.93056e-71	APOL1	padj<0.05 & Upregulated
10462.1	1.20349	0.135142	8.90543	5.31779e-19	9.18676e-18	APOL2	padj<0.05 & Upregulated
266.034	6.02283	0.33984	17.7225	2.81013e-70	2.38943e-68	APOL3	padj<0.05 & Upregulated
48.9931	4.77652	0.649667	7.35226	1.94883e-13	2.33311e-12	APOL4	padj<0.05 & Upregulated
0.115843	0.776761	3.53381	0.219808	0.826021	NA	APOL5	N.S.
2529.93	1.82004	0.54836	3.31907	0.000903188	0.00306771	APOL6	padj<0.05 & Upregulated
150.538	0.295291	0.225118	1.31171	0.189617	0.299847	APOLD1	N.S.
81.1005	-0.149437	0.224076	-0.666902	0.504835	0.626444	APOM	N.S.
2579.24	-0.401562	0.20498	-1.95903	0.050109	0.101955	APOO	N.S.
1675.19	0.0495908	0.130646	0.37958	0.704257	0.792812	APOOL	N.S.
2387.82	0.216069	0.145875	1.4812	0.138554	0.233476	APOPT1	N.S.
78656.4	0.993364	0.123113	8.06875	7.10244e-16	1.01561e-14	APP	padj<0.05 & Upregulated
6129.75	0.343093	0.0857052	4.00318	6.2498e-05	0.000271875	APPBP2	padj<0.05 & Upregulated
4234.84	-0.221546	0.139711	-1.58575	0.112796	0.198601	APPL1	N.S.
2098.14	0.257593	0.126679	2.03343	0.0420092	0.0877381	APPL2	N.S.
11533	-0.396397	0.120351	-3.29368	0.000988861	0.00332437	APRT	padj<0.05 & Downregulated
3067.17	-0.0521352	0.106289	-0.490507	0.623775	0.728414	APTX	N.S.
1011.33	6.38144	0.215871	29.5614	4.68541e-192	3.26686e-189	AQP1	padj<0.05 & Upregulated
0.468545	1.41381	3.15218	0.448519	0.653778	NA	AQP10	N.S.
372.466	0.181542	0.193651	0.937472	0.348516	0.478873	AQP11	N.S.
0.116482	-0.665912	3.53381	-0.18844	0.850532	NA	AQP12A	N.S.
0.121161	-0.665912	3.53381	-0.18844	0.850532	NA	AQP12B	N.S.
2.78535	3.53796	1.35313	2.61465	0.00893186	0.0234277	AQP2	padj<0.05 & Upregulated
44.3224	3.32099	0.466558	7.11807	1.0945e-12	1.23324e-11	AQP3	padj<0.05 & Upregulated
143.337	-0.854103	0.551051	-1.54995	0.121153	0.210152	AQP4	N.S.
8.14285	4.13156	1.05128	3.93002	8.4938e-05	0.000359795	AQP5	padj<0.05 & Upregulated
10.7789	-0.431282	0.570435	-0.756059	0.449614	0.576308	AQP6	N.S.
1.79685	4.32247	1.70387	2.53686	0.0111853	0.0285155	AQP7	padj<0.05 & Upregulated
2.95863	0.75548	1.01281	0.745928	0.455711	0.582026	AQP8	N.S.
4.60451	3.31375	1.08696	3.04863	0.00229885	0.00707097	AQP9	padj<0.05 & Upregulated
4236.49	-0.0374633	0.122054	-0.306941	0.758888	0.834269	AQR	N.S.
176.748	-0.709556	0.392522	-1.80768	0.0706555	0.1354	AR	N.S.
8527.29	0.253288	0.130638	1.93885	0.0525198	0.105933	ARAF	N.S.
6170.5	0.290301	0.122156	2.37649	0.0174784	0.0416496	ARAP1	padj<0.05 & Upregulated
2054.24	0.25722	0.214231	1.20067	0.22988	0.347682	ARAP2	N.S.
14.2567	3.56679	0.721358	4.94455	7.63219e-07	4.48388e-06	ARAP3	padj<0.05 & Upregulated
126.555	1.92912	0.4322	4.46349	8.06359e-06	4.07883e-05	ARC	padj<0.05 & Upregulated
16605.2	0.0240632	0.134124	0.179409	0.857616	0.906116	ARCN1	N.S.
3064.79	3.16282	0.36647	8.63051	6.10771e-18	9.96849e-17	AREG	padj<0.05 & Upregulated
5497.95	0.0822174	0.124881	0.658365	0.510303	0.631226	AREL1	N.S.
48386.5	0.0173315	0.0932642	0.185832	0.852576	0.902323	ARF1	N.S.
15685.2	-0.165129	0.114148	-1.44662	0.148004	0.246287	ARF3	N.S.
30028.7	0.0161783	0.168785	0.0958513	0.923639	0.951028	ARF4	N.S.
15858.5	-0.283781	0.149729	-1.8953	0.0580525	0.115003	ARF5	N.S.
16060.1	0.400875	0.11555	3.46929	0.000521835	0.00188169	ARF6	padj<0.05 & Upregulated
10584.4	-0.0889768	0.0969653	-0.917615	0.35882	0.489099	ARFGAP1	N.S.
5602.36	0.182271	0.0832806	2.18864	0.0286231	0.0634367	ARFGAP2	N.S.
5184.83	-0.028293	0.0579676	-0.488083	0.625491	0.729684	ARFGAP3	N.S.
5760.48	0.526614	0.112852	4.6664	3.06527e-06	1.65012e-05	ARFGEF1	padj<0.05 & Upregulated
2770.4	-0.00420532	0.135285	-0.0310849	0.975202	0.984749	ARFGEF2	N.S.
2146.87	0.350858	0.168057	2.08773	0.036822	0.0785006	ARFGEF3	N.S.
3337.98	-0.204248	0.0827024	-2.46967	0.0135236	0.0334939	ARFIP1	padj<0.05 & Downregulated
9262.58	-0.213256	0.0833193	-2.55951	0.0104821	0.0269608	ARFIP2	padj<0.05 & Downregulated
2342.32	0.130027	0.122766	1.05915	0.289533	0.416382	ARFRP1	N.S.
1.94438	-3.12477	1.71567	-1.82131	0.068559	0.132065	ARG1	N.S.
218.362	0.330637	0.269164	1.22838	0.219303	0.336177	ARG2	N.S.
0.721412	-2.94652	2.77503	-1.06179	0.288329	0.414983	ARGFX	N.S.
4084.64	0.0963052	0.109676	0.878088	0.379896	0.509679	ARGLU1	N.S.
6615.39	0.209915	0.078981	2.65779	0.00786543	0.0209552	ARHGAP1	padj<0.05 & Upregulated
1309.42	-0.0306553	0.119331	-0.256893	0.797261	0.863976	ARHGAP10	N.S.
2571.73	-1.87384	0.19646	-9.53802	1.45589e-21	2.89698e-20	ARHGAP11A	padj<0.05 & Downregulated
358.602	-1.19836	0.252694	-4.74235	2.11256e-06	1.15871e-05	ARHGAP11B	padj<0.05 & Downregulated
2317.05	0.577962	0.127421	4.53585	5.73708e-06	2.96972e-05	ARHGAP12	padj<0.05 & Upregulated
26.3546	-2.30941	0.508398	-4.54253	5.55837e-06	2.88615e-05	ARHGAP15	padj<0.05 & Downregulated
6151.96	0.506224	0.0991296	5.10669	3.27855e-07	2.03665e-06	ARHGAP17	padj<0.05 & Upregulated
315.326	2.23931	0.418059	5.35644	8.48765e-08	5.68547e-07	ARHGAP18	padj<0.05 & Upregulated
1675.51	-1.28009	0.164335	-7.78955	6.72492e-15	9.01708e-14	ARHGAP19	padj<0.05 & Downregulated
5.13242	-2.91124	1.27769	-2.27853	0.0226951	0.0521553	ARHGAP19-SLIT1	N.S.
47.5752	1.31488	0.290183	4.53119	5.86529e-06	3.03286e-05	ARHGAP20	padj<0.05 & Upregulated
5012.53	1.26328	0.131183	9.62989	5.97911e-22	1.21329e-20	ARHGAP21	padj<0.05 & Upregulated
351.943	0.0108919	0.197693	0.0550953	0.956063	0.972468	ARHGAP22	N.S.
3754.42	0.395553	0.14325	2.76127	0.00575762	0.0159481	ARHGAP23	padj<0.05 & Upregulated
10.3779	-0.305817	0.60089	-0.508941	0.610794	0.71821	ARHGAP24	N.S.
2.72307	3.13641	1.37564	2.27996	0.0226101	0.0519944	ARHGAP25	N.S.
1030	0.937845	0.11788	7.95594	1.7777e-15	2.475e-14	ARHGAP26	padj<0.05 & Upregulated
3472.16	0.775888	0.150423	5.15805	2.4953e-07	1.57821e-06	ARHGAP27	padj<0.05 & Upregulated
20.1011	1.0245	0.530922	1.92967	0.0536483	0.107766	ARHGAP28	N.S.
6983.12	7.54146	0.171545	43.962	3.55124e-300	7.73771e-297	ARHGAP29	padj<0.05 & Upregulated
98.6496	2.43953	0.33721	7.23446	4.674e-13	5.39911e-12	ARHGAP30	padj<0.05 & Upregulated
521.941	1.04258	0.275234	3.78796	0.000151891	0.000613727	ARHGAP31	padj<0.05 & Upregulated
2343.49	-0.000154417	0.203224	-0.000759838	0.999394	0.999738	ARHGAP32	N.S.
763.523	-1.37922	0.23459	-5.87929	4.1203e-09	3.26756e-08	ARHGAP33	padj<0.05 & Downregulated
7210.37	0.0290769	0.105326	0.276066	0.782497	0.85326	ARHGAP35	N.S.
15.7417	0.987052	0.543484	1.81616	0.0693461	0.13336	ARHGAP36	N.S.
2086.21	-0.369306	0.179372	-2.05888	0.0395056	0.0832272	ARHGAP39	N.S.
1368.25	-1.42421	0.356689	-3.99287	6.52794e-05	0.000282915	ARHGAP4	padj<0.05 & Downregulated
0.985997	0.95569	2.01261	0.474851	0.634893	0.737395	ARHGAP40	N.S.
1035.49	0.514239	0.1595	3.22406	0.00126385	0.00414568	ARHGAP42	padj<0.05 & Upregulated
1422.67	-0.356438	0.130484	-2.73166	0.00630162	0.0172547	ARHGAP44	padj<0.05 & Downregulated
6215.68	0.429694	0.155767	2.75857	0.00580553	0.0160603	ARHGAP5	padj<0.05 & Upregulated
13.7248	-1.01295	0.509708	-1.98731	0.0468877	0.0962661	ARHGAP6	N.S.
2028.72	0.123619	0.129148	0.957194	0.338469	0.468243	ARHGAP8	N.S.
76.9821	2.23443	0.597632	3.7388	0.000184898	0.00073533	ARHGAP9	padj<0.05 & Upregulated
32644.6	0.286094	0.116916	2.447	0.0144051	0.0353257	ARHGDIA	padj<0.05 & Upregulated
12.8265	3.03173	0.807675	3.75365	0.000174275	0.00069722	ARHGDIB	padj<0.05 & Upregulated
536.319	0.096997	0.145138	0.668307	0.503938	0.625651	ARHGDIG	N.S.
3069.61	-0.000203927	0.137693	-0.00148102	0.998818	0.999352	ARHGEF1	N.S.
5093.6	-0.271056	0.134427	-2.01637	0.0437609	0.0907873	ARHGEF10	N.S.
1350.54	0.700636	0.139139	5.03553	4.76538e-07	2.88421e-06	ARHGEF10L	padj<0.05 & Upregulated
5609.87	0.012334	0.171191	0.072048	0.942564	0.963344	ARHGEF11	N.S.
9905.16	0.318953	0.115	2.77351	0.00554554	0.0154194	ARHGEF12	padj<0.05 & Upregulated
7.45661	3.33487	0.903648	3.69046	0.000223851	0.000875663	ARHGEF15	padj<0.05 & Upregulated
1603.91	-0.0909547	0.144478	-0.629541	0.528995	0.648408	ARHGEF16	N.S.
2673.08	0.267656	0.164302	1.62905	0.103302	0.185043	ARHGEF17	N.S.
4323.88	0.606264	0.0788709	7.6868	1.50865e-14	1.98022e-13	ARHGEF18	padj<0.05 & Upregulated
173.504	-0.506293	0.3563	-1.42097	0.155325	0.256243	ARHGEF19	N.S.
6130.1	0.978017	0.173288	5.64388	1.66258e-08	1.22694e-07	ARHGEF2	padj<0.05 & Upregulated
1345.79	-0.399005	0.235381	-1.69514	0.0900482	0.165311	ARHGEF25	N.S.
5449.69	-0.801606	0.129221	-6.20338	5.52643e-10	4.84319e-09	ARHGEF26	padj<0.05 & Downregulated
241.799	4.89004	0.411919	11.8714	1.66754e-32	5.45344e-31	ARHGEF28	padj<0.05 & Upregulated
2805.8	1.96898	0.13268	14.8401	8.05985e-50	4.47425e-48	ARHGEF3	padj<0.05 & Upregulated
16.8563	0.41325	0.723993	0.570792	0.56814	0.682233	ARHGEF33	N.S.
0.123055	0.776761	3.53381	0.219808	0.826021	NA	ARHGEF35	N.S.
48.1779	2.55992	0.464073	5.51621	3.46392e-08	2.45047e-07	ARHGEF37	padj<0.05 & Upregulated
6.72387	2.30646	1.11249	2.07324	0.0381495	0.0807509	ARHGEF38	N.S.
827.958	-2.2992	0.156779	-14.6652	1.07675e-48	5.84699e-47	ARHGEF39	padj<0.05 & Downregulated
176.455	-0.71241	0.442739	-1.6091	0.107596	0.191202	ARHGEF4	N.S.
1874.57	0.269073	0.257507	1.04492	0.296062	0.423734	ARHGEF40	N.S.
5.77388	2.76982	0.974767	2.84153	0.00448983	0.0127888	ARHGEF5	padj<0.05 & Upregulated
267.736	0.0579732	0.328238	0.17662	0.859807	0.907716	ARHGEF6	N.S.
4941.53	-0.0323243	0.119025	-0.271576	0.785948	0.85565	ARHGEF7	N.S.
954.641	-0.177475	0.119772	-1.48177	0.138402	0.233338	ARHGEF9	N.S.
9167.81	-0.494382	0.167837	-2.94561	0.00322317	0.00951611	ARID1A	padj<0.05 & Downregulated
4747.01	-0.357155	0.173439	-2.05925	0.03947	0.0831824	ARID1B	N.S.
3422.5	-0.369361	0.151036	-2.44552	0.0144645	0.0354415	ARID2	padj<0.05 & Downregulated
1783.67	0.019003	0.144782	0.131252	0.895576	0.931709	ARID3A	N.S.
1719.82	-0.654702	0.161992	-4.04158	5.30925e-05	0.000234174	ARID3B	padj<0.05 & Downregulated
14.677	-0.0946475	0.470879	-0.201002	0.840697	0.894093	ARID3C	N.S.
1271.02	-0.063929	0.142547	-0.448476	0.65381	0.752745	ARID4A	N.S.
3900.97	0.200113	0.140715	1.42212	0.154993	0.255817	ARID4B	N.S.
1608.22	1.257	0.16642	7.55317	4.2479e-14	5.43651e-13	ARID5A	padj<0.05 & Upregulated
12038.6	-0.644923	0.111981	-5.75923	8.44993e-09	6.48001e-08	ARID5B	padj<0.05 & Downregulated
7677.72	0.108657	0.136046	0.798676	0.424478	0.552459	ARIH1	N.S.
9729.07	-0.199424	0.130491	-1.52825	0.12645	0.217414	ARIH2	N.S.
190.179	-0.227876	0.194325	-1.17265	0.240934	0.360708	ARIH2OS	N.S.
6860.43	-0.173198	0.0864686	-2.00302	0.0451751	0.0933105	ARL1	N.S.
2070.21	-0.965269	0.311055	-3.10321	0.00191434	0.00599984	ARL10	padj<0.05 & Downregulated
2.67389	4.88844	1.59874	3.05769	0.00223054	0.00688272	ARL11	padj<0.05 & Upregulated
1.91065	1.71288	1.37071	1.24963	0.211433	0.326661	ARL13A	N.S.
1852.54	-0.732166	0.165967	-4.41152	1.02648e-05	5.08744e-05	ARL13B	padj<0.05 & Downregulated
139.125	5.58925	0.388625	14.3821	6.70216e-47	3.42596e-45	ARL14	padj<0.05 & Upregulated
2255.14	0.0937954	0.117493	0.798309	0.424691	0.552695	ARL14EP	N.S.
45.2575	8.96959	1.12655	7.96197	1.69324e-15	2.36497e-14	ARL14EPL	padj<0.05 & Upregulated
2320.43	0.994222	0.114116	8.71235	2.97635e-18	4.93163e-17	ARL15	padj<0.05 & Upregulated
3643.48	-0.214869	0.108709	-1.97654	0.0480933	0.0984168	ARL16	N.S.
372.384	-0.266946	0.208468	-1.28051	0.200364	0.313711	ARL17A	N.S.
257.616	-0.354302	0.121902	-2.90644	0.00365567	0.0106338	ARL17B	padj<0.05 & Downregulated
6402.97	-0.27035	0.106328	-2.54261	0.0110028	0.0281134	ARL2	padj<0.05 & Downregulated
8.14312	-0.484304	1.45129	-0.333706	0.738602	0.819684	ARL2-SNX15	N.S.
6942.46	0.409235	0.0996439	4.10698	4.00864e-05	0.000180648	ARL2BP	padj<0.05 & Upregulated
2046.44	-0.475166	0.189609	-2.50603	0.0122096	0.0307018	ARL3	padj<0.05 & Downregulated
14764.3	-0.932514	0.170792	-5.45994	4.76292e-08	3.31163e-07	ARL4A	padj<0.05 & Downregulated
507.779	3.22265	0.251163	12.8309	1.10056e-37	4.31099e-36	ARL4C	padj<0.05 & Upregulated
4098.14	0.286649	0.18917	1.51529	0.129698	0.221665	ARL4D	N.S.
4293.98	-0.572211	0.159606	-3.58514	0.000336897	0.00126589	ARL5A	padj<0.05 & Downregulated
4808.56	-0.108942	0.169078	-0.644328	0.519363	0.639699	ARL5B	N.S.
2.20099	-2.84116	1.49421	-1.90144	0.0572441	0.113699	ARL5C	N.S.
685.15	-0.442161	0.116042	-3.81036	0.000138763	0.00056487	ARL6	padj<0.05 & Downregulated
16741.4	-0.628242	0.0956226	-6.57001	5.03108e-11	4.82115e-10	ARL6IP1	padj<0.05 & Downregulated
8217.92	0.145942	0.150532	0.969509	0.332291	0.461565	ARL6IP4	N.S.
9214.21	0.310224	0.120346	2.57778	0.0099437	0.025724	ARL6IP5	padj<0.05 & Upregulated
1979.36	-0.376988	0.163383	-2.30739	0.0210331	0.0488446	ARL6IP6	padj<0.05 & Downregulated
6281.99	0.0395554	0.119093	0.332138	0.739785	0.820461	ARL8A	N.S.
11898	0.129771	0.109578	1.18429	0.2363	0.355112	ARL8B	N.S.
5.97083	0.875366	0.778855	1.12391	0.261049	0.38432	ARL9	N.S.
4400.48	-0.284694	0.0928072	-3.06758	0.002158	0.00668137	ARMC1	padj<0.05 & Downregulated
3638.41	-0.00901606	0.0916003	-0.0984283	0.921592	0.949261	ARMC10	N.S.
79.1432	-1.34586	0.268053	-5.02087	5.14376e-07	3.09603e-06	ARMC12	padj<0.05 & Downregulated
142.248	-0.621773	0.230826	-2.69369	0.00706664	0.0190975	ARMC2	padj<0.05 & Downregulated
6.36717	-0.158833	0.89857	-0.176762	0.859695	0.907708	ARMC3	N.S.
3.3808	2.72166	1.38619	1.96341	0.0495989	0.101059	ARMC4	N.S.
1662.17	-0.127664	0.101213	-1.26135	0.207183	0.321787	ARMC5	N.S.
3723.37	-0.468107	0.109393	-4.27914	1.87617e-05	8.90862e-05	ARMC6	padj<0.05 & Downregulated
1762.8	-0.0746744	0.111076	-0.672279	0.501406	0.623302	ARMC7	N.S.
2952.63	0.0536108	0.0788956	0.679515	0.496811	0.618925	ARMC8	N.S.
1388.85	-0.415232	0.168945	-2.45779	0.0139795	0.0344663	ARMC9	padj<0.05 & Downregulated
23.9255	0.672474	0.455933	1.47494	0.140228	0.235725	ARMCX1	N.S.
0.314466	1.67239	3.51445	0.475861	0.634173	NA	ARMCX2	N.S.
4261.67	0.0757191	0.209518	0.361397	0.717803	0.803856	ARMCX3	N.S.
371.465	-0.69988	0.219453	-3.1892	0.00142665	0.00461911	ARMCX4	padj<0.05 & Downregulated
1185.75	-0.327107	0.165086	-1.98144	0.0475424	0.0974495	ARMCX5	N.S.
2047.9	-0.0876753	0.197356	-0.44425	0.656862	0.754962	ARMCX6	N.S.
3.24453	0.945164	1.05449	0.89632	0.370082	0.499992	ARMS2	N.S.
2212.39	-0.070953	0.14183	-0.500268	0.616886	0.722565	ARMT1	N.S.
5585.51	-0.298537	0.188103	-1.58709	0.112492	0.198165	ARNT	N.S.
452.488	0.543022	0.313049	1.73462	0.0828083	0.154196	ARNT2	N.S.
1215.82	0.692046	0.142558	4.8545	1.20693e-06	6.88642e-06	ARNTL	padj<0.05 & Upregulated
2223.25	0.772097	0.116282	6.63987	3.1397e-11	3.07116e-10	ARNTL2	padj<0.05 & Upregulated
11711.6	0.25386	0.138943	1.82708	0.0676871	0.130656	ARPC1A	N.S.
13003.7	-0.0311334	0.104293	-0.298519	0.765307	0.839103	ARPC1B	N.S.
25896.2	0.137616	0.106583	1.29116	0.196647	0.308835	ARPC2	N.S.
19685.8	0.254303	0.156748	1.62237	0.104725	0.187092	ARPC3	N.S.
6328.53	-0.522193	0.113548	-4.59886	4.24817e-06	2.24054e-05	ARPC4	padj<0.05 & Downregulated
664.804	-0.395848	0.275253	-1.43812	0.150399	0.249486	ARPC4-TTLL3	N.S.
24871.5	-0.00748999	0.0916528	-0.0817214	0.934868	0.958463	ARPC5	N.S.
4925.34	-0.012962	0.149488	-0.0867092	0.930903	0.956244	ARPC5L	N.S.
1699.13	-0.534106	0.161156	-3.31422	0.000918999	0.00311473	ARPIN	padj<0.05 & Downregulated
12152.3	0.146435	0.103758	1.41131	0.158152	0.259727	ARPP19	N.S.
5.47448	-1.21139	0.909694	-1.33165	0.182976	0.291585	ARPP21	N.S.
0.96186	-0.499593	2.29102	-0.218066	0.827378	0.884298	ARR3	N.S.
873.507	0.789848	0.171021	4.61842	3.86669e-06	2.05614e-05	ARRB1	padj<0.05 & Upregulated
1802.99	-0.667884	0.124471	-5.36577	8.06047e-08	5.41225e-07	ARRB2	padj<0.05 & Downregulated
2771.33	0.555665	0.147272	3.77305	0.000161262	0.00064933	ARRDC1	padj<0.05 & Upregulated
2452.58	0.347737	0.136411	2.54918	0.0107977	0.0276745	ARRDC2	padj<0.05 & Upregulated
6840.23	2.32727	0.200811	11.5894	4.66487e-31	1.42405e-29	ARRDC3	padj<0.05 & Upregulated
2432.73	0.998526	0.102793	9.71391	2.63058e-22	5.4458e-21	ARRDC4	padj<0.05 & Upregulated
0.121161	-0.665912	3.53381	-0.18844	0.850532	NA	ARRDC5	N.S.
2616.08	0.686207	0.15281	4.49058	7.10298e-06	3.62447e-05	ARSA	padj<0.05 & Upregulated
2351.33	-0.369841	0.148394	-2.49228	0.0126924	0.0317283	ARSB	padj<0.05 & Downregulated
1855.7	0.00647107	0.203096	0.0318621	0.974582	0.98452	ARSD	N.S.
0.413353	-0.82461	3.52587	-0.233875	0.815082	NA	ARSE	N.S.
0.371938	-0.744511	3.38978	-0.219634	0.826156	NA	ARSF	N.S.
552.254	-0.447268	0.198131	-2.25743	0.023981	0.0546494	ARSG	N.S.
0	NA	NA	NA	NA	NA	ARSH	N.S.
32.066	4.78836	0.576252	8.3095	9.6108e-17	1.44793e-15	ARSI	padj<0.05 & Upregulated
458.011	2.86268	0.148937	19.2207	2.48577e-82	2.64204e-80	ARSJ	padj<0.05 & Upregulated
1367.27	0.130617	0.11709	1.11552	0.264627	0.388406	ARSK	N.S.
0.837386	2.25709	2.76794	0.815439	0.414821	0.543136	ART1	N.S.
0.889573	3.25009	2.57578	1.26179	0.207025	0.32157	ART3	N.S.
3.82754	3.88052	1.53117	2.53435	0.0112655	0.028688	ART4	padj<0.05 & Upregulated
0.780467	-0.225963	2.09525	-0.107845	0.914118	0.944069	ART5	N.S.
75.9039	1.10984	0.283301	3.91751	8.94676e-05	0.000377605	ARTN	padj<0.05 & Upregulated
1873.77	-0.263684	0.0932474	-2.82778	0.00468714	0.0132978	ARV1	padj<0.05 & Downregulated
1927.65	0.377784	0.247923	1.52379	0.12756	0.218768	ARVCF	N.S.
42.7082	-0.596101	0.317557	-1.87715	0.0604976	0.119175	ARX	N.S.
54.4846	0.59259	0.306895	1.93092	0.053493	0.107498	AS3MT	N.S.
7213.72	-0.256324	0.148035	-1.73151	0.0833604	0.155059	ASAH1	N.S.
255.044	-0.116465	0.25846	-0.450613	0.652268	0.751417	ASAH2	N.S.
665.381	-0.353523	0.152259	-2.32185	0.0202411	0.0472256	ASAH2B	padj<0.05 & Downregulated
8742.11	0.685114	0.119032	5.75573	8.62664e-09	6.601e-08	ASAP1	padj<0.05 & Upregulated
2744.57	1.21733	0.156004	7.80319	6.03626e-15	8.12495e-14	ASAP2	padj<0.05 & Upregulated
2134.61	0.634558	0.189522	3.34821	0.000813355	0.00279416	ASAP3	padj<0.05 & Upregulated
2069.18	-0.0199143	0.11774	-0.169138	0.865688	0.911771	ASB1	N.S.
0.574332	2.58804	3.46084	0.747807	0.454577	NA	ASB10	N.S.
0.679398	-1.90385	2.9356	-0.648538	0.516637	0.636746	ASB11	N.S.
23.3576	0.797919	0.397953	2.00506	0.0449569	0.0929369	ASB12	N.S.
2050.85	-0.208576	0.128765	-1.61981	0.105272	0.187954	ASB13	N.S.
25.5096	0.17662	0.384946	0.458818	0.646365	0.74659	ASB14	N.S.
0.385879	2.03602	3.48736	0.58383	0.559335	NA	ASB15	N.S.
102.176	-0.697981	0.292718	-2.38449	0.017103	0.0408948	ASB16	padj<0.05 & Downregulated
0	NA	NA	NA	NA	NA	ASB17	N.S.
0.918074	1.45645	1.99186	0.731202	0.464656	0.590305	ASB18	N.S.
50.9902	1.80738	0.328702	5.49853	3.82963e-08	2.68846e-07	ASB2	padj<0.05 & Upregulated
1480.86	0.0922616	0.123411	0.747597	0.454704	0.580953	ASB3	N.S.
0.459823	1.36157	3.50952	0.387965	0.698042	NA	ASB4	N.S.
4.28878	2.5318	0.962535	2.63034	0.00852985	0.0224836	ASB5	padj<0.05 & Upregulated
3542.16	0.118418	0.0900012	1.31574	0.188262	0.298219	ASB6	N.S.
1616.08	-0.0143679	0.0869385	-0.165265	0.868735	0.913492	ASB7	N.S.
1989.19	0.0512832	0.0943455	0.543568	0.586739	0.698357	ASB8	N.S.
7.47531	1.49863	0.784324	1.91073	0.0560391	0.1117	ASB9	N.S.
2199.19	0.0969578	0.101108	0.958952	0.337583	0.467239	ASCC1	N.S.
5737.42	0.295787	0.125863	2.35007	0.0187697	0.0442787	ASCC2	padj<0.05 & Upregulated
7611.69	0.0668742	0.146546	0.456337	0.648147	0.748054	ASCC3	N.S.
8.03247	-0.688489	0.74717	-0.921462	0.356809	0.487158	ASCL1	N.S.
5.32318	-0.0154958	0.838939	-0.0184708	0.985263	0.991177	ASCL2	N.S.
0.358138	-1.93861	3.36339	-0.576387	0.564354	NA	ASCL3	N.S.
0.123055	0.776761	3.53381	0.219808	0.826021	NA	ASCL4	N.S.
13.4862	0.00456151	0.531275	0.00858597	0.993149	0.995777	ASCL5	N.S.
2787.89	-0.356715	0.1575	-2.26485	0.0235217	0.0537713	ASF1A	N.S.
2013.49	-1.65567	0.122755	-13.4876	1.85133e-41	8.08783e-40	ASF1B	padj<0.05 & Downregulated
85.6831	-0.430304	0.438353	-0.981638	0.326278	0.455207	ASGR1	N.S.
0	NA	NA	NA	NA	NA	ASGR2	N.S.
3761.43	-0.065693	0.177557	-0.369982	0.711396	0.798212	ASH1L	N.S.
3642.63	-0.138382	0.0814352	-1.69929	0.0892645	0.164063	ASH2L	N.S.
1971.05	-0.0982806	0.142943	-0.687549	0.491737	0.61453	ASIC1	N.S.
17.7559	5.59259	1.00074	5.58844	2.29113e-08	1.66057e-07	ASIC2	padj<0.05 & Upregulated
477.173	0.637292	0.165532	3.84997	0.000118132	0.000487375	ASIC3	padj<0.05 & Upregulated
64.742	0.582368	0.333321	1.74717	0.0806084	0.150938	ASIC4	N.S.
0	NA	NA	NA	NA	NA	ASIC5	N.S.
3.97492	-0.342433	1.40385	-0.243924	0.807289	0.870784	ASIP	N.S.
2340.78	0.144797	0.168869	0.857449	0.391197	0.520928	ASL	N.S.
0	NA	NA	NA	NA	NA	ASMT	N.S.
1832.25	-0.778618	0.114916	-6.77556	1.23925e-11	1.26992e-10	ASMTL	padj<0.05 & Downregulated
8997.67	-0.0343522	0.107983	-0.318126	0.750389	0.828585	ASNA1	N.S.
8919.65	0.16552	0.315807	0.524117	0.600197	0.70905	ASNS	N.S.
6551.67	-0.219952	0.0924392	-2.37942	0.0173399	0.0413647	ASNSD1	padj<0.05 & Downregulated
1.0626	1.64073	1.85327	0.885316	0.375986	0.505969	ASPA	N.S.
5.77681	0.170157	0.807088	0.210829	0.833021	0.888671	ASPDH	N.S.
1.08041	-3.43085	2.61389	-1.31254	0.189337	0.299568	ASPG	N.S.
9391.99	1.24519	0.158953	7.83368	4.73781e-15	6.43685e-14	ASPH	padj<0.05 & Upregulated
1561.16	0.00532288	0.170035	0.0313047	0.975027	0.984639	ASPHD1	N.S.
830.344	-0.0619513	0.172853	-0.358404	0.720041	0.80569	ASPHD2	N.S.
2555.48	-1.91329	0.157999	-12.1095	9.40409e-34	3.25243e-32	ASPM	padj<0.05 & Downregulated
3.21836	2.94516	1.28782	2.28694	0.0221993	0.0511983	ASPN	N.S.
56.2212	0.507926	0.240756	2.10971	0.034883	0.0749471	ASPRV1	N.S.
3801.61	-0.0534064	0.158115	-0.33777	0.735537	0.817466	ASPSCR1	N.S.
2044.14	-1.1031	0.166464	-6.62667	3.43352e-11	3.34729e-10	ASRGL1	padj<0.05 & Downregulated
30.873	0.370504	0.418871	0.884529	0.376411	0.506228	ASS1	N.S.
474.943	-0.0725548	0.102401	-0.708535	0.478613	0.602884	ASTE1	N.S.
4.94983	4.28473	1.34403	3.18797	0.00143275	0.00463602	ASTL	padj<0.05 & Upregulated
785.51	7.46306	0.636702	11.7214	9.89779e-32	3.11423e-30	ASTN1	padj<0.05 & Upregulated
1562.32	-0.890716	0.141467	-6.29626	3.04905e-10	2.73536e-09	ASTN2	padj<0.05 & Downregulated
3642.65	-0.365581	0.121448	-3.01018	0.0026109	0.00789291	ASUN	padj<0.05 & Downregulated
7664.86	-0.34591	0.144384	-2.39577	0.0165855	0.0398487	ASXL1	padj<0.05 & Downregulated
4680.24	-0.0656677	0.155777	-0.421549	0.673354	0.768848	ASXL2	N.S.
13.1925	-0.803269	0.673992	-1.19181	0.233337	0.351592	ASXL3	N.S.
0.398805	-1.17189	3.34019	-0.350844	0.725705	NA	ASZ1	N.S.
5918.23	0.19478	0.141636	1.37521	0.169066	0.274088	ATAD1	N.S.
4291.86	-1.04778	0.140281	-7.4692	8.06848e-14	1.00387e-12	ATAD2	padj<0.05 & Downregulated
2594.99	-0.852743	0.184703	-4.61684	3.8963e-06	2.07062e-05	ATAD2B	padj<0.05 & Downregulated
4396.77	-0.479625	0.0849219	-5.64783	1.62483e-08	1.2026e-07	ATAD3A	padj<0.05 & Downregulated
4305.21	-0.966695	0.101241	-9.54845	1.31657e-21	2.62877e-20	ATAD3B	padj<0.05 & Downregulated
34.5529	-0.566943	0.437748	-1.29514	0.195273	0.307092	ATAD3C	N.S.
661.344	-1.32739	0.198853	-6.67525	2.46814e-11	2.4528e-10	ATAD5	padj<0.05 & Downregulated
1166	-0.374452	0.138453	-2.70454	0.00683995	0.0185625	ATAT1	padj<0.05 & Downregulated
1.11663	-1.77925	2.25544	-0.788871	0.430187	0.557867	ATCAY	N.S.
2213.1	0.00297278	0.115632	0.0257089	0.97949	0.987545	ATE1	N.S.
1752.93	-0.0303452	0.147023	-0.206398	0.83648	0.890804	ATF1	N.S.
6478	-0.297514	0.112071	-2.6547	0.00793799	0.021128	ATF2	padj<0.05 & Downregulated
7749.18	3.01686	0.350629	8.60414	7.68881e-18	1.24673e-16	ATF3	padj<0.05 & Upregulated
42044	0.521318	0.216839	2.40417	0.016209	0.0390749	ATF4	padj<0.05 & Upregulated
9071.7	-0.47145	0.0978907	-4.81608	1.46402e-06	8.24535e-06	ATF5	padj<0.05 & Downregulated
5205.9	0.310813	0.0964951	3.22102	0.00127733	0.00418283	ATF6	padj<0.05 & Upregulated
4278.72	0.0655372	0.111186	0.589438	0.555568	0.671232	ATF6B	N.S.
2917.13	-0.0342339	0.0959578	-0.35676	0.721271	0.806497	ATF7	N.S.
3205.08	-0.130972	0.137164	-0.95486	0.339649	0.469576	ATF7IP	N.S.
1110.14	-0.665383	0.121333	-5.48394	4.15952e-08	2.9025e-07	ATF7IP2	padj<0.05 & Downregulated
953.412	-0.4445	0.118664	-3.74586	0.000179776	0.000717415	ATG10	padj<0.05 & Downregulated
4680.95	0.0654246	0.0699247	0.935644	0.349456	0.479689	ATG101	N.S.
4079.39	0.290496	0.122643	2.36864	0.0178538	0.0424107	ATG12	padj<0.05 & Upregulated
7787.15	0.322151	0.0904602	3.56124	0.000369103	0.00137358	ATG13	padj<0.05 & Upregulated
2622.47	0.500881	0.126038	3.97404	7.06633e-05	0.000304583	ATG14	padj<0.05 & Upregulated
3290.19	0.393136	0.0998288	3.9381	8.21294e-05	0.00034883	ATG16L1	padj<0.05 & Upregulated
1000.29	-0.791354	0.218534	-3.6212	0.00029324	0.00111995	ATG16L2	padj<0.05 & Downregulated
2808.49	0.912229	0.177183	5.14852	2.62547e-07	1.65275e-06	ATG2A	padj<0.05 & Upregulated
2787.97	0.0125137	0.174906	0.0715453	0.942964	0.963583	ATG2B	N.S.
4077.98	0.000828826	0.095637	0.00866638	0.993085	0.99577	ATG3	N.S.
1318.65	0.762424	0.138578	5.50179	3.75958e-08	2.64247e-07	ATG4A	padj<0.05 & Upregulated
5718.52	-0.00786718	0.0909618	-0.0864888	0.931078	0.956256	ATG4B	N.S.
1386.5	-1.33236	0.183574	-7.25786	3.93256e-13	4.56078e-12	ATG4C	padj<0.05 & Downregulated
3053.84	0.252741	0.285279	0.885944	0.375648	0.505631	ATG4D	N.S.
3979.84	-0.137967	0.0880414	-1.56707	0.117099	0.204422	ATG5	N.S.
2502.38	0.106969	0.122496	0.873247	0.382528	0.512281	ATG7	N.S.
18006.3	1.1872	0.154147	7.70174	1.34222e-14	1.76576e-13	ATG9A	padj<0.05 & Upregulated
508.799	3.8109	0.352841	10.8006	3.41886e-27	8.98857e-26	ATG9B	padj<0.05 & Upregulated
3925.19	-0.525626	0.270603	-1.94243	0.0520856	0.105216	ATHL1	N.S.
8873.13	-0.380417	0.107297	-3.54547	0.000391909	0.00144947	ATIC	padj<0.05 & Downregulated
964.787	-0.584913	0.108964	-5.36797	7.9629e-08	5.35705e-07	ATL1	padj<0.05 & Downregulated
4486.7	-0.316535	0.118137	-2.67939	0.0073756	0.0198183	ATL2	padj<0.05 & Downregulated
7492.6	0.442024	0.0988131	4.47334	7.70083e-06	3.9044e-05	ATL3	padj<0.05 & Upregulated
3664.49	-0.598145	0.276241	-2.1653	0.0303644	0.0667204	ATM	N.S.
8575.53	0.534341	0.120434	4.43679	9.13095e-06	4.57361e-05	ATMIN	padj<0.05 & Upregulated
11567.9	0.266438	0.116658	2.28391	0.0223765	0.0515251	ATN1	N.S.
1.65923	-2.42454	1.84899	-1.31128	0.189763	0.30005	ATOH1	N.S.
20.7488	-0.451958	0.384072	-1.17675	0.239295	0.358777	ATOH7	N.S.
78.3963	2.87612	0.518668	5.54521	2.93607e-08	2.0932e-07	ATOH8	padj<0.05 & Upregulated
6459.48	0.856147	0.193592	4.42242	9.76023e-06	4.85256e-05	ATOX1	padj<0.05 & Upregulated
143.542	5.33248	0.425944	12.5192	5.86344e-36	2.18388e-34	ATP10A	padj<0.05 & Upregulated
545.154	2.72389	0.424251	6.42047	1.35858e-10	1.26166e-09	ATP10B	padj<0.05 & Upregulated
1936.54	0.413421	0.137137	3.01466	0.00257269	0.00778956	ATP10D	padj<0.05 & Upregulated
5963.19	0.101703	0.164792	0.617163	0.537127	0.655007	ATP11A	N.S.
5109.17	-0.468814	0.162425	-2.88635	0.00389742	0.0112514	ATP11B	padj<0.05 & Downregulated
4105.01	-0.2194	0.20454	-1.07265	0.283427	0.409415	ATP11C	N.S.
2.19523	-0.655728	1.22215	-0.536537	0.591587	0.701924	ATP12A	N.S.
7371.68	0.0358403	0.101945	0.351564	0.725165	0.809242	ATP13A1	N.S.
5792.5	0.568541	0.0966002	5.88551	3.96825e-09	3.15559e-08	ATP13A2	padj<0.05 & Upregulated
9245.37	0.809717	0.105534	7.6726	1.68546e-14	2.19904e-13	ATP13A3	padj<0.05 & Upregulated
43.4323	1.0976	0.366572	2.99424	0.00275133	0.00826584	ATP13A4	padj<0.05 & Upregulated
32.4325	2.65349	0.85935	3.08779	0.00201648	0.00628003	ATP13A5	padj<0.05 & Upregulated
35195.2	0.705368	0.217329	3.24563	0.00117191	0.003874	ATP1A1	padj<0.05 & Upregulated
39.6968	7.97209	1.12819	7.06627	1.59151e-12	1.77263e-11	ATP1A2	padj<0.05 & Upregulated
2617.83	-1.06544	0.151299	-7.04198	1.89528e-12	2.10425e-11	ATP1A3	padj<0.05 & Downregulated
0.373952	1.17029	3.38613	0.345613	0.729634	NA	ATP1A4	N.S.
7803.59	0.306891	0.305193	1.00556	0.314627	0.443244	ATP1B1	N.S.
2.88129	1.04322	1.14664	0.909802	0.362927	0.493462	ATP1B2	N.S.
11637.6	0.169792	0.218187	0.778195	0.436454	0.563877	ATP1B3	N.S.
0.597415	0.708905	3.01414	0.235193	0.814059	0.87482	ATP1B4	N.S.
189.182	-0.0473705	0.27196	-0.174182	0.861723	0.909002	ATP2A1	N.S.
18877.2	-0.404008	0.163653	-2.46868	0.0135612	0.0335631	ATP2A2	padj<0.05 & Downregulated
154.167	-1.35503	0.215837	-6.27803	3.42888e-10	3.06193e-09	ATP2A3	padj<0.05 & Downregulated
4542.55	-0.135188	0.0911027	-1.48391	0.137832	0.232716	ATP2B1	N.S.
1450.37	-0.440114	0.249129	-1.76661	0.077294	0.145892	ATP2B2	N.S.
0.647208	-0.392577	2.97302	-0.132046	0.894948	0.931445	ATP2B3	N.S.
22466.6	0.941014	0.115	8.18273	2.77491e-16	4.05444e-15	ATP2B4	padj<0.05 & Upregulated
10588.3	0.390263	0.159281	2.45015	0.0142797	0.0350873	ATP2C1	padj<0.05 & Upregulated
46.5557	0.954153	0.455076	2.09669	0.0360211	0.0770693	ATP2C2	N.S.
6.55546	1.02614	0.692732	1.4813	0.138526	0.233457	ATP4A	N.S.
0	NA	NA	NA	NA	NA	ATP4B	N.S.
64084.4	-0.315367	0.148168	-2.12844	0.0333006	0.0719768	ATP5A1	N.S.
95656.3	-0.261457	0.215494	-1.21329	0.225019	0.341932	ATP5B	N.S.
19219.5	-0.344198	0.149007	-2.30994	0.0208914	0.0485285	ATP5C1	padj<0.05 & Downregulated
9922.27	-0.0795865	0.192607	-0.413206	0.679456	0.773643	ATP5D	N.S.
23886.7	0.326713	0.222196	1.47038	0.141458	0.237351	ATP5E	N.S.
16.624	0.25135	0.504511	0.498205	0.61834	0.723747	ATP5EP2	N.S.
17653.5	-0.324979	0.172427	-1.88474	0.059465	0.117414	ATP5F1	N.S.
5650.06	-0.561448	0.123731	-4.53765	5.68838e-06	2.94926e-05	ATP5G1	padj<0.05 & Downregulated
15553.6	-0.178129	0.127897	-1.39275	0.163694	0.266918	ATP5G2	N.S.
35690.1	-0.404279	0.170963	-2.36471	0.0180442	0.0427814	ATP5G3	padj<0.05 & Downregulated
12900.7	0.0111786	0.180456	0.0619465	0.950605	0.96892	ATP5H	N.S.
8239.06	-0.35302	0.154417	-2.28615	0.0222454	0.0512841	ATP5I	N.S.
9922.13	-0.221604	0.196502	-1.12775	0.259427	0.382482	ATP5J	N.S.
15840.5	-0.298836	0.157295	-1.89984	0.057454	0.113986	ATP5J2	N.S.
933.02	-0.511874	0.201878	-2.53557	0.0112265	0.0286053	ATP5J2-PTCD1	padj<0.05 & Downregulated
15421.6	-0.30382	0.164822	-1.84332	0.0652823	0.12679	ATP5L	N.S.
1.01901	0.0240464	1.74623	0.0137704	0.989013	0.99363	ATP5L2	N.S.
20007.3	-0.273363	0.232486	-1.17583	0.239665	0.359209	ATP5O	N.S.
1240.12	-0.253003	0.166021	-1.52392	0.127529	0.218752	ATP5S	N.S.
4721.48	-0.35546	0.0961643	-3.69638	0.000218696	0.000858194	ATP5SL	padj<0.05 & Downregulated
11458.7	0.303906	0.143027	2.12482	0.033602	0.0725346	ATP6AP1	N.S.
164.931	0.9555	0.267607	3.57053	0.000356259	0.0013309	ATP6AP1L	padj<0.05 & Upregulated
20998.2	0.151431	0.0986546	1.53496	0.124794	0.215247	ATP6AP2	N.S.
10860.6	0.33286	0.1006	3.30873	0.000937186	0.00316836	ATP6V0A1	padj<0.05 & Upregulated
2915.96	0.105482	0.116075	0.908746	0.363484	0.493988	ATP6V0A2	N.S.
13.3535	3.75382	0.810932	4.62902	3.67408e-06	1.9597e-05	ATP6V0A4	padj<0.05 & Upregulated
11761.2	-0.0121006	0.120217	-0.100657	0.919823	0.948184	ATP6V0B	N.S.
20242.8	0.343159	0.132653	2.58689	0.00968477	0.0251475	ATP6V0C	padj<0.05 & Upregulated
11876.5	0.167827	0.104059	1.6128	0.106787	0.190142	ATP6V0D1	N.S.
20.5668	3.24628	0.511694	6.34419	2.23594e-10	2.03311e-09	ATP6V0D2	padj<0.05 & Upregulated
14853.2	0.767218	0.199785	3.84021	0.000122927	0.000505362	ATP6V0E1	padj<0.05 & Upregulated
5902.52	-0.560364	0.1011	-5.54269	2.97864e-08	2.12181e-07	ATP6V0E2	padj<0.05 & Downregulated
7010.84	-0.0388456	0.108523	-0.357947	0.720383	0.805814	ATP6V1A	N.S.
123.06	2.02128	0.211812	9.5428	1.39022e-21	2.76948e-20	ATP6V1B1	padj<0.05 & Upregulated
9012.79	0.4141	0.131376	3.15202	0.00162145	0.00517931	ATP6V1B2	padj<0.05 & Upregulated
14385.9	-0.474256	0.12457	-3.80714	0.000140585	0.000571622	ATP6V1C1	padj<0.05 & Downregulated
460.778	1.62171	0.154114	10.5228	6.78307e-26	1.67236e-24	ATP6V1C2	padj<0.05 & Upregulated
5542.9	0.643624	0.219177	2.93655	0.00331887	0.00976227	ATP6V1D	padj<0.05 & Upregulated
11661	0.362092	0.139091	2.60328	0.00923361	0.0241053	ATP6V1E1	padj<0.05 & Upregulated
761.555	-0.703155	0.212337	-3.3115	0.000927986	0.00314076	ATP6V1E2	padj<0.05 & Downregulated
11389.5	0.152718	0.149582	1.02097	0.307269	0.435165	ATP6V1F	N.S.
11346.2	0.224553	0.127008	1.76803	0.0770557	0.145521	ATP6V1G1	N.S.
32.532	-0.0678059	0.348475	-0.194579	0.845723	0.897358	ATP6V1G2	N.S.
99.9063	-0.53502	0.363268	-1.4728	0.140806	0.236477	ATP6V1G2-DDX39B	N.S.
0	NA	NA	NA	NA	NA	ATP6V1G3	N.S.
7381.7	0.260012	0.144244	1.80259	0.071453	0.136703	ATP6V1H	N.S.
1065.35	-0.238695	0.213286	-1.11913	0.263084	0.386739	ATP7A	N.S.
2228.13	-0.310179	0.134077	-2.31344	0.0206987	0.0481273	ATP7B	padj<0.05 & Downregulated
661.461	-0.878808	0.174965	-5.02277	5.09316e-07	3.06981e-06	ATP8A1	padj<0.05 & Downregulated
156.565	0.309211	0.320558	0.964601	0.334745	0.464283	ATP8A2	N.S.
2013.23	3.05025	0.156549	19.4843	1.49107e-84	1.61434e-82	ATP8B1	padj<0.05 & Upregulated
7766.67	-0.0914501	0.240001	-0.381041	0.703173	0.792155	ATP8B2	N.S.
287.36	-0.835627	0.277654	-3.0096	0.00261596	0.00790547	ATP8B3	padj<0.05 & Downregulated
0.273491	1.40097	3.51735	0.398303	0.690407	NA	ATP8B4	N.S.
4689	-0.623537	0.122987	-5.06994	3.97931e-07	2.43551e-06	ATP9A	padj<0.05 & Downregulated
1027.78	0.0311604	0.113125	0.275452	0.782969	0.853631	ATP9B	N.S.
5104.12	0.230972	0.129783	1.77967	0.0751294	0.142594	ATPAF1	N.S.
2747.16	0.152998	0.116959	1.30814	0.190826	0.301363	ATPAF2	N.S.
6835.39	0.0368144	0.170023	0.216526	0.828578	0.885025	ATPIF1	N.S.
2230.08	-0.0575603	0.174157	-0.330508	0.741016	0.821461	ATR	N.S.
5671.03	-0.206769	0.130336	-1.58643	0.112642	0.19841	ATRAID	N.S.
1354.33	-0.472546	0.140538	-3.36241	0.000772649	0.002668	ATRIP	padj<0.05 & Downregulated
6053.51	-0.0608588	0.114791	-0.53017	0.595994	0.705615	ATRN	N.S.
86.7367	-0.64453	0.217137	-2.96831	0.00299446	0.00891942	ATRNL1	padj<0.05 & Downregulated
4050.47	-0.0861575	0.191819	-0.449161	0.653315	0.752242	ATRX	N.S.
187.067	4.13233	0.42799	9.6552	4.67253e-22	9.52594e-21	ATXN1	padj<0.05 & Upregulated
13502.7	0.232372	0.141126	1.64656	0.0996491	0.179496	ATXN10	N.S.
4455.04	0.381711	0.119141	3.20385	0.00135603	0.00441318	ATXN1L	padj<0.05 & Upregulated
4134.14	0.0994019	0.122744	0.809831	0.418037	0.546367	ATXN2	N.S.
16133.2	0.203645	0.109412	1.86126	0.0627072	0.122622	ATXN2L	N.S.
1732.88	0.446166	0.0909335	4.90651	9.27103e-07	5.39037e-06	ATXN3	padj<0.05 & Upregulated
0.241676	-1.39291	3.53047	-0.39454	0.693182	NA	ATXN3L	N.S.
1693.55	-0.257811	0.159349	-1.61791	0.105683	0.188552	ATXN7	N.S.
453.81	0.016626	0.142167	0.116947	0.906902	0.939344	ATXN7L1	N.S.
924.963	-0.383511	0.130413	-2.94073	0.00327441	0.00964976	ATXN7L2	padj<0.05 & Downregulated
7715.51	-0.116529	0.145308	-0.801944	0.422585	0.550871	ATXN7L3	N.S.
8290.96	-0.0545482	0.122391	-0.44569	0.655821	0.75426	ATXN7L3B	N.S.
769.559	0.435335	0.135359	3.21616	0.00129919	0.00424642	AUH	padj<0.05 & Upregulated
504.028	-1.04198	0.141195	-7.37968	1.5867e-13	1.91669e-12	AUNIP	padj<0.05 & Downregulated
15285.9	-0.0678011	0.117634	-0.576372	0.564363	0.67877	AUP1	N.S.
2800.49	-1.36752	0.137834	-9.92151	3.35627e-23	7.24048e-22	AURKA	padj<0.05 & Downregulated
10774	-0.0476982	0.140062	-0.340551	0.733442	0.815502	AURKAIP1	N.S.
1722.98	-2.43748	0.1205	-20.2281	5.54088e-91	6.75406e-89	AURKB	padj<0.05 & Downregulated
28.2108	0.646275	0.355712	1.81685	0.06924	0.1332	AURKC	N.S.
1058.6	0.660998	0.184352	3.58553	0.000336396	0.00126455	AUTS2	padj<0.05 & Upregulated
1038.45	1.37206	0.174665	7.85539	3.98525e-15	5.42711e-14	AVEN	padj<0.05 & Upregulated
83.5064	0.428445	0.350835	1.22122	0.222004	0.339004	AVIL	N.S.
3537.71	-0.0696117	0.113865	-0.61135	0.540968	0.6584	AVL9	N.S.
0.9214	2.41551	2.23861	1.07902	0.280578	0.406343	AVP	N.S.
2028.53	0.601963	0.210403	2.86099	0.00422315	0.0121035	AVPI1	padj<0.05 & Upregulated
5.17499	-2.50707	1.08271	-2.31556	0.0205826	0.0479133	AVPR1A	padj<0.05 & Downregulated
0	NA	NA	NA	NA	NA	AVPR1B	N.S.
18.4355	-1.4571	0.717908	-2.02965	0.0423921	0.0884001	AVPR2	N.S.
0.157233	0.776761	3.53381	0.219808	0.826021	NA	AWAT1	N.S.
0.123055	0.776761	3.53381	0.219808	0.826021	NA	AWAT2	N.S.
5.90394	0.384382	0.762227	0.504288	0.614059	0.72064	AXDND1	N.S.
3446.88	0.150731	0.079443	1.89735	0.0577822	0.114559	AXIN1	N.S.
944.611	-0.476116	0.174303	-2.73154	0.00630389	0.0172582	AXIN2	padj<0.05 & Downregulated
833.181	2.6314	0.219767	11.9736	4.88757e-33	1.64788e-31	AXL	padj<0.05 & Upregulated
32.8179	4.9243	0.84538	5.82495	5.71283e-09	4.45749e-08	AZGP1	padj<0.05 & Upregulated
4314.29	-0.0248173	0.130065	-0.190807	0.848676	0.899616	AZI2	N.S.
21697.1	-0.552936	0.18658	-2.96353	0.00304134	0.00903899	AZIN1	padj<0.05 & Downregulated
595.95	0.353076	0.231137	1.52756	0.126621	0.217645	AZIN2	N.S.
118.111	-1.28151	0.267724	-4.78669	1.69552e-06	9.44842e-06	AZU1	padj<0.05 & Downregulated
152093	2.11902	0.188066	11.2674	1.90047e-29	5.41292e-28	B2M	padj<0.05 & Upregulated
111.117	0.398649	0.514772	0.774419	0.438683	0.565834	B3GALNT1	N.S.
1163.33	-0.147778	0.171393	-0.862216	0.388568	0.51822	B3GALNT2	N.S.
189.124	-1.43408	0.289086	-4.96074	7.02254e-07	4.14247e-06	B3GALT1	padj<0.05 & Downregulated
4714.58	-0.321962	0.285962	-1.12589	0.260213	0.383348	B3GALT2	N.S.
89.0148	-0.384081	0.339471	-1.13141	0.257882	0.380718	B3GALT4	N.S.
1.45885	4.01753	1.8275	2.19837	0.0279227	0.0621689	B3GALT5	N.S.
3056.71	-0.372289	0.133536	-2.78794	0.00530448	0.0148248	B3GALT6	padj<0.05 & Downregulated
22.1453	-0.138593	0.393813	-0.351926	0.724894	0.809043	B3GAT1	N.S.
83.6938	-0.8393	0.244732	-3.42947	0.000604765	0.00215061	B3GAT2	padj<0.05 & Downregulated
6007.4	-0.224127	0.10392	-2.15673	0.0310269	0.0679178	B3GAT3	N.S.
1321.42	0.46833	0.0873528	5.36136	8.25965e-08	5.54172e-07	B3GLCT	padj<0.05 & Upregulated
3345.09	-0.0822341	0.101542	-0.809851	0.418026	0.546367	B3GNT2	N.S.
0.916626	2.17198	1.95352	1.11183	0.266211	0.390206	B3GNT3	N.S.
471.951	-0.649386	0.156203	-4.15733	3.21994e-05	0.000147469	B3GNT4	padj<0.05 & Downregulated
794.672	-0.574031	0.234702	-2.44578	0.0144538	0.035431	B3GNT5	padj<0.05 & Downregulated
0.750165	-1.02983	2.87428	-0.358293	0.720124	0.80569	B3GNT6	N.S.
7.58587	1.54801	0.800461	1.9339	0.053125	0.106919	B3GNT7	N.S.
12.8558	0.992223	0.673624	1.47296	0.140761	0.236424	B3GNT8	N.S.
158.331	0.497545	0.20705	2.40302	0.0162602	0.0391914	B3GNT9	padj<0.05 & Upregulated
495.324	-0.866462	0.198126	-4.37329	1.22388e-05	6.00772e-05	B3GNTL1	padj<0.05 & Downregulated
7918.48	-1.26869	0.217692	-5.82792	5.61215e-09	4.38482e-08	B4GALNT1	padj<0.05 & Downregulated
4.755	4.35038	1.46522	2.9691	0.00298673	0.00890249	B4GALNT2	padj<0.05 & Upregulated
1864.79	2.57754	0.159728	16.137	1.40163e-58	9.18488e-57	B4GALNT3	padj<0.05 & Upregulated
4869.85	-0.547875	0.180487	-3.03553	0.00240111	0.00733633	B4GALNT4	padj<0.05 & Downregulated
10476	1.22105	0.096954	12.5941	2.27494e-36	8.54621e-35	B4GALT1	padj<0.05 & Upregulated
6399.03	-0.246722	0.0867226	-2.84496	0.00444173	0.0126654	B4GALT2	padj<0.05 & Downregulated
5120.83	-0.362075	0.10558	-3.42939	0.000604949	0.0021507	B4GALT3	padj<0.05 & Downregulated
1795.91	0.603739	0.0928502	6.50229	7.91045e-11	7.46142e-10	B4GALT4	padj<0.05 & Upregulated
6264.83	-0.0244507	0.107609	-0.227219	0.820254	0.879272	B4GALT5	N.S.
1350.06	-0.707601	0.184296	-3.83947	0.000123298	0.000506771	B4GALT6	padj<0.05 & Downregulated
2012.25	-0.352014	0.100517	-3.50203	0.000461733	0.00168413	B4GALT7	padj<0.05 & Downregulated
3263.24	-0.588306	0.10979	-5.35849	8.3922e-08	5.62632e-07	B4GAT1	padj<0.05 & Downregulated
850.497	-0.778495	0.178655	-4.35753	1.31539e-05	6.43156e-05	B9D1	padj<0.05 & Downregulated
294.014	-0.0420901	0.145615	-0.289051	0.772543	0.845075	B9D2	N.S.
6.31367	1.88124	0.866864	2.17016	0.0299944	0.0660559	BAALC	N.S.
17.9368	0.572437	0.570431	1.00352	0.315612	0.444236	BAAT	N.S.
6178.83	0.102342	0.10962	0.933606	0.350507	0.480699	BABAM1	N.S.
3201.76	0.286886	0.0840363	3.41384	0.000640553	0.00226113	BACE1	padj<0.05 & Upregulated
2951.88	0.743898	0.191134	3.89201	9.94157e-05	0.000416396	BACE2	padj<0.05 & Upregulated
2139.72	0.470029	0.123639	3.80161	0.000143757	0.000583428	BACH1	padj<0.05 & Upregulated
47.8988	2.29152	0.430984	5.31694	1.05529e-07	6.96506e-07	BACH2	padj<0.05 & Upregulated
3916.78	-0.258803	0.147563	-1.75385	0.0794567	0.14915	BAD	N.S.
7311.68	0.431944	0.172724	2.50077	0.0123924	0.0311177	BAG1	padj<0.05 & Upregulated
2368.38	0.179058	0.142966	1.25245	0.210405	0.325572	BAG2	N.S.
12945.3	0.71285	0.203702	3.49947	0.000466191	0.00169787	BAG3	padj<0.05 & Upregulated
2098.36	0.1312	0.108124	1.21342	0.22497	0.341904	BAG4	N.S.
3225.58	0.0361711	0.0822446	0.439799	0.660083	0.757565	BAG5	N.S.
16684.1	0.138726	0.138104	1.0045	0.315137	0.443748	BAG6	N.S.
0	NA	NA	NA	NA	NA	BAGE5	N.S.
1204.38	-0.0353645	0.217059	-0.162925	0.870577	0.914875	BAHCC1	N.S.
3526.65	0.15879	0.0762178	2.08337	0.0372177	0.079163	BAHD1	N.S.
4380.28	0.563141	0.145404	3.87294	0.00010753	0.000447445	BAIAP2	padj<0.05 & Upregulated
4745.15	0.0688411	0.135051	0.509742	0.610232	0.717889	BAIAP2L1	N.S.
43.6136	0.514567	0.338742	1.51905	0.12875	0.220434	BAIAP2L2	N.S.
479.871	-0.511354	0.329769	-1.55065	0.120987	0.209926	BAIAP3	N.S.
8528.81	0.57825	0.115929	4.98796	6.10195e-07	3.63262e-06	BAK1	padj<0.05 & Upregulated
533.234	1.32968	0.420543	3.16181	0.00156789	0.00502666	BAMBI	padj<0.05 & Upregulated
13329.5	-0.0790275	0.123944	-0.637606	0.52373	0.643453	BANF1	N.S.
0	NA	NA	NA	NA	NA	BANF2	N.S.
6.47589	2.32518	0.851575	2.73044	0.00632498	0.0173078	BANK1	padj<0.05 & Upregulated
1156.34	-0.177135	0.120809	-1.46624	0.142584	0.238864	BANP	N.S.
9887.56	-0.0231591	0.123165	-0.188034	0.85085	0.901098	BAP1	N.S.
713.954	-1.15636	0.173087	-6.68079	2.37652e-11	2.3685e-10	BARD1	padj<0.05 & Downregulated
0.572518	2.58557	2.48078	1.04224	0.297302	NA	BARHL1	N.S.
179.548	-0.672171	0.211775	-3.17399	0.00150359	0.00483919	BARHL2	padj<0.05 & Downregulated
4453.28	-0.317073	0.203016	-1.56181	0.118333	0.206064	BARX1	N.S.
77.131	4.00591	0.392816	10.1979	2.02518e-24	4.64485e-23	BARX2	padj<0.05 & Upregulated
487.148	3.09705	0.288588	10.7317	7.22364e-27	1.85891e-25	BASP1	padj<0.05 & Upregulated
0.529714	0.52848	3.51186	0.150484	0.880383	NA	BATF	N.S.
2278.82	1.82242	0.173786	10.4866	9.95823e-26	2.43795e-24	BATF2	padj<0.05 & Upregulated
324.095	-0.805397	0.397944	-2.02389	0.042981	0.0894035	BATF3	N.S.
16354.2	-0.113576	0.0982023	-1.15655	0.247454	0.368444	BAX	N.S.
4478.37	0.15296	0.149296	1.02454	0.305581	0.433585	BAZ1A	N.S.
7647.63	-0.292949	0.116357	-2.51768	0.0118132	0.0298256	BAZ1B	padj<0.05 & Downregulated
7996.73	-0.0080776	0.173428	-0.0465762	0.962851	0.97726	BAZ2A	N.S.
1188.98	1.05131	0.169194	6.21364	5.17722e-10	4.55089e-09	BAZ2B	padj<0.05 & Upregulated
5924.71	0.649443	0.141907	4.57654	4.72728e-06	2.476e-05	BBC3	padj<0.05 & Upregulated
1072.53	-0.24594	0.132266	-1.85944	0.0629654	0.123022	BBIP1	N.S.
262.167	-0.278894	0.19799	-1.40863	0.158944	0.260854	BBOF1	N.S.
10.7698	2.74426	0.654633	4.19206	2.76439e-05	0.000127747	BBOX1	padj<0.05 & Upregulated
1611.19	0.125979	0.12521	1.00614	0.314348	0.442959	BBS1	N.S.
1152.06	0.218806	0.130232	1.68012	0.0929334	0.169714	BBS10	N.S.
1088.97	-0.510265	0.150028	-3.40112	0.000671097	0.00235465	BBS12	padj<0.05 & Downregulated
3468.35	0.277674	0.130996	2.11972	0.0340299	0.0733221	BBS2	N.S.
2568.04	-0.240228	0.127317	-1.88685	0.05918	0.116931	BBS4	N.S.
1089.28	-0.0806844	0.203496	-0.396492	0.691742	0.783225	BBS5	N.S.
2124.54	-0.420315	0.0908302	-4.62748	3.70144e-06	1.97369e-05	BBS7	padj<0.05 & Downregulated
881.742	-0.231204	0.0892547	-2.59038	0.00958695	0.0249083	BBS9	padj<0.05 & Downregulated
3735.62	0.26678	0.165679	1.61022	0.107349	0.190844	BBX	N.S.
4165.2	0.818699	0.145012	5.64573	1.64486e-08	1.21541e-07	BCAM	padj<0.05 & Upregulated
31.102	0.540643	0.508716	1.06276	0.287891	0.414455	BCAN	N.S.
4879.52	0.60107	0.107475	5.59266	2.23611e-08	1.62339e-07	BCAP29	padj<0.05 & Upregulated
26629.7	0.0964817	0.115141	0.837945	0.402061	0.531015	BCAP31	N.S.
7689.91	0.649337	0.0865883	7.49913	6.42435e-14	8.09125e-13	BCAR1	padj<0.05 & Upregulated
3463.62	3.15097	0.155858	20.217	6.94317e-91	8.40462e-89	BCAR3	padj<0.05 & Upregulated
65.2069	-1.18285	0.27134	-4.35931	1.30475e-05	6.38132e-05	BCAS1	padj<0.05 & Downregulated
4184.99	0.268968	0.186154	1.44487	0.148494	0.246938	BCAS2	N.S.
1298.47	0.356111	0.128847	2.76382	0.00571293	0.0158343	BCAS3	padj<0.05 & Upregulated
1100.31	-0.226313	0.095213	-2.37691	0.0174583	0.0416129	BCAS4	padj<0.05 & Downregulated
424.838	3.3378	0.428472	7.79002	6.69988e-15	8.99042e-14	BCAT1	padj<0.05 & Upregulated
4878.39	-0.205157	0.135387	-1.51534	0.129688	0.221665	BCAT2	N.S.
7698.22	-0.352761	0.145997	-2.41623	0.0156823	0.0379664	BCCIP	padj<0.05 & Downregulated
897.341	-0.276359	0.1341	-2.06084	0.0393181	0.0829018	BCDIN3D	N.S.
337.007	-1.75817	0.389855	-4.50981	6.48867e-06	3.32855e-05	BCHE	padj<0.05 & Downregulated
1491.8	0.606409	0.114748	5.2847	1.25913e-07	8.23871e-07	BCKDHA	padj<0.05 & Upregulated
1299.06	-0.0316691	0.0965236	-0.328097	0.742838	0.822644	BCKDHB	N.S.
3051.6	0.0763564	0.127202	0.600276	0.548322	0.664798	BCKDK	N.S.
1764.35	0.783019	0.127533	6.13975	8.26508e-10	7.12506e-09	BCL10	padj<0.05 & Upregulated
61.7643	-0.073868	0.277223	-0.266457	0.789888	0.858153	BCL11A	N.S.
46.5812	1.52096	0.464253	3.27615	0.00105234	0.00351339	BCL11B	padj<0.05 & Upregulated
91.1364	-0.972088	0.247875	-3.92168	8.79327e-05	0.000371577	BCL2	padj<0.05 & Downregulated
4.87886	3.19046	1.01829	3.13315	0.00172939	0.00549088	BCL2A1	padj<0.05 & Upregulated
13892.6	1.82749	0.158318	11.5432	7.99213e-31	2.4228e-29	BCL2L1	padj<0.05 & Upregulated
10.611	0.563414	0.574006	0.981546	0.326324	0.455234	BCL2L10	N.S.
1391.75	0.775969	0.128233	6.05122	1.43752e-09	1.20469e-08	BCL2L11	padj<0.05 & Upregulated
3600.89	-0.571646	0.11446	-4.99428	5.9055e-07	3.52409e-06	BCL2L12	padj<0.05 & Downregulated
5799.5	0.720197	0.0753625	9.55644	1.21875e-21	2.43904e-20	BCL2L13	padj<0.05 & Upregulated
10.7578	2.80367	0.690976	4.05755	4.95899e-05	0.000219949	BCL2L14	padj<0.05 & Upregulated
13.0262	-0.388491	0.71602	-0.54257	0.587426	0.698793	BCL2L15	N.S.
2522.88	0.152159	0.0905792	1.67984	0.092988	0.169796	BCL2L2	N.S.
571.039	-0.769668	0.321563	-2.39352	0.0166875	0.0400496	BCL2L2-PABPN1	padj<0.05 & Downregulated
3075.95	-0.0297322	0.188149	-0.158024	0.874438	0.917383	BCL3	N.S.
851.367	0.816134	0.147091	5.54848	2.88157e-08	2.05771e-07	BCL6	padj<0.05 & Upregulated
9.54723	-1.44449	0.821537	-1.75828	0.0786996	0.148096	BCL6B	N.S.
2418.5	-0.410054	0.186079	-2.20366	0.0275484	0.0614534	BCL7A	N.S.
4778.48	-0.198915	0.0780472	-2.54865	0.0108141	0.0277028	BCL7B	padj<0.05 & Downregulated
5405.61	-0.737552	0.170288	-4.33122	1.48288e-05	7.16809e-05	BCL7C	padj<0.05 & Downregulated
4484.05	-0.664958	0.234622	-2.83416	0.00459456	0.0130585	BCL9	padj<0.05 & Downregulated
4752.06	0.628383	0.201046	3.12556	0.00177464	0.00560395	BCL9L	padj<0.05 & Upregulated
11697.1	-0.210443	0.148403	-1.41805	0.156175	0.257183	BCLAF1	N.S.
13.1816	3.93596	0.774148	5.08426	3.6907e-07	2.27003e-06	BCO1	padj<0.05 & Upregulated
76.0034	1.55188	0.289651	5.35775	8.42664e-08	5.64725e-07	BCO2	padj<0.05 & Upregulated
2598.27	0.330148	0.0943453	3.49936	0.000466377	0.00169787	BCOR	padj<0.05 & Upregulated
2730.49	-0.234322	0.207349	-1.13009	0.258439	0.381386	BCORL1	N.S.
8039.04	0.196406	0.0901183	2.17943	0.0292999	0.0647555	BCR	N.S.
2105.05	-0.359345	0.110877	-3.24094	0.00119137	0.0039316	BCS1L	padj<0.05 & Downregulated
8.06268	3.20408	0.844002	3.79629	0.000146876	0.000594647	BDH1	padj<0.05 & Upregulated
1148.26	0.511889	0.202515	2.52766	0.0114826	0.0291426	BDH2	padj<0.05 & Upregulated
78.3359	7.63207	0.908957	8.39651	4.59934e-17	7.08225e-16	BDKRB1	padj<0.05 & Upregulated
44.5185	8.2167	1.0556	7.78388	7.03311e-15	9.4086e-14	BDKRB2	padj<0.05 & Upregulated
91.3189	2.10493	0.354973	5.92983	3.03248e-09	2.44379e-08	BDNF	padj<0.05 & Upregulated
2694.76	0.0113102	0.135862	0.0832477	0.933655	0.957777	BDP1	N.S.
273.082	1.33958	0.274824	4.87431	1.09192e-06	6.27123e-06	BEAN1	padj<0.05 & Upregulated
7887.53	0.13511	0.0990217	1.36444	0.172428	0.278218	BECN1	N.S.
0	NA	NA	NA	NA	NA	BECN2	N.S.
542.395	-0.964052	0.586113	-1.64482	0.100006	0.179953	BEGAIN	N.S.
0.248764	0.0554324	3.53381	0.0156863	0.987485	NA	BEND2	N.S.
746.735	-0.626944	0.126629	-4.95104	7.38181e-07	4.34117e-06	BEND3	padj<0.05 & Downregulated
907.43	-0.868204	0.316307	-2.74481	0.00605453	0.0166593	BEND4	padj<0.05 & Downregulated
5.84682	-0.75519	0.959109	-0.787386	0.431056	0.558725	BEND5	N.S.
215.096	1.73633	0.215182	8.06915	7.07888e-16	1.01307e-14	BEND6	padj<0.05 & Upregulated
1787.74	0.374986	0.127712	2.93618	0.00332285	0.00977068	BEND7	padj<0.05 & Upregulated
361.775	2.94723	0.361731	8.14756	3.7133e-16	5.40288e-15	BEST1	padj<0.05 & Upregulated
6.93882	-1.13929	0.729625	-1.56148	0.118411	0.206154	BEST2	N.S.
9.63224	5.16405	1.25018	4.13064	3.61749e-05	0.000164552	BEST3	padj<0.05 & Upregulated
17.0116	0.877629	0.521084	1.68424	0.092136	0.168452	BEST4	N.S.
1822.92	0.16964	0.0859154	1.9745	0.0483252	0.0988217	BET1	N.S.
5550.78	-0.0363583	0.091254	-0.39843	0.690313	0.782301	BET1L	N.S.
13.5576	0.406047	0.557374	0.7285	0.466308	0.591487	BEX1	N.S.
774.536	0.273065	0.142934	1.91043	0.0560781	0.111765	BEX2	N.S.
1573.88	-0.0404378	0.19352	-0.20896	0.83448	0.889489	BEX4	N.S.
0.736581	-0.0160348	2.11183	-0.00759285	0.993942	0.996056	BEX5	N.S.
7263.14	-0.146616	0.0736458	-1.99083	0.0464993	0.0956038	BFAR	N.S.
99.544	0.0412913	0.263652	0.156613	0.87555	0.918063	BFSP1	N.S.
0.369164	2.03972	3.48802	0.584779	0.558696	NA	BFSP2	N.S.
65.8588	2.64558	0.370697	7.13676	9.55586e-13	1.08443e-11	BGLAP	padj<0.05 & Upregulated
201.583	7.13017	1.02892	6.92978	4.21481e-12	4.52392e-11	BGN	padj<0.05 & Upregulated
12.6325	-1.09326	0.829435	-1.31808	0.187478	0.297301	BHLHA15	N.S.
1.00055	1.60546	1.77014	0.906966	0.364425	0.494727	BHLHA9	N.S.
1199.02	0.00373594	0.133418	0.0280017	0.977661	0.986489	BHLHB9	N.S.
2.95005	-0.758511	1.33033	-0.570166	0.568565	0.68259	BHLHE22	N.S.
0	NA	NA	NA	NA	NA	BHLHE23	N.S.
20590.8	0.689435	0.0923767	7.4633	8.43822e-14	1.04398e-12	BHLHE40	padj<0.05 & Upregulated
432.547	6.39495	0.308472	20.7311	1.81747e-95	2.45584e-93	BHLHE41	padj<0.05 & Upregulated
1.83217	-1.50796	1.69123	-0.891634	0.372589	0.502445	BHMG1	N.S.
0.271935	1.5192	3.52587	0.430874	0.66656	NA	BHMT	N.S.
0.289467	-0.0397416	3.53381	-0.0112461	0.991027	NA	BHMT2	N.S.
57.1609	0.835874	0.423855	1.97208	0.048601	0.0992708	BICC1	N.S.
1300.87	0.775065	0.110563	7.01018	2.38015e-12	2.61756e-11	BICD1	padj<0.05 & Upregulated
5031.09	0.223101	0.0845173	2.6397	0.00829791	0.0219552	BICD2	padj<0.05 & Upregulated
2261.48	-0.338175	0.22236	-1.52084	0.128299	0.21977	BID	N.S.
699.937	0.929838	0.183376	5.07067	3.9641e-07	2.42705e-06	BIK	padj<0.05 & Upregulated
2343.2	0.470019	0.195453	2.40476	0.016183	0.0390375	BIN1	padj<0.05 & Upregulated
7.48335	0.243383	0.697579	0.348896	0.727167	0.810801	BIN2	N.S.
1567.25	0.454477	0.10306	4.40982	1.03458e-05	5.12616e-05	BIN3	padj<0.05 & Upregulated
7342.43	0.36068	0.209337	1.72296	0.0848954	0.157511	BIRC2	N.S.
1965.26	2.51959	0.30383	8.29275	1.10657e-16	1.65995e-15	BIRC3	padj<0.05 & Upregulated
5837.09	-2.39007	0.138141	-17.3017	4.56872e-67	3.66993e-65	BIRC5	padj<0.05 & Downregulated
6296.17	0.1488	0.0882336	1.68644	0.0917116	0.167852	BIRC6	N.S.
8.05415	5.73488	1.19717	4.79036	1.66485e-06	9.28937e-06	BIRC7	padj<0.05 & Upregulated
0	NA	NA	NA	NA	NA	BIRC8	N.S.
2553.02	-0.403365	0.131186	-3.07476	0.00210673	0.00654122	BIVM	padj<0.05 & Downregulated
273.082	-0.447319	1.37563	-0.325175	0.745048	0.824725	BIVM-ERCC5	N.S.
0	NA	NA	NA	NA	NA	BLACE	N.S.
2860.22	0.17138	0.115103	1.48893	0.136507	0.231038	BLCAP	N.S.
1.78182	-0.22488	1.74782	-0.128663	0.897624	0.933227	BLID	N.S.
4.86501	-0.661316	0.856311	-0.772285	0.439946	0.566918	BLK	N.S.
707.058	-1.38385	0.159354	-8.6841	3.81763e-18	6.30163e-17	BLM	padj<0.05 & Downregulated
7466.27	-0.707137	0.164269	-4.30475	1.67178e-05	8.00132e-05	BLMH	padj<0.05 & Downregulated
16.4775	7.51415	1.2052	6.23479	4.52386e-10	3.99673e-09	BLNK	padj<0.05 & Upregulated
3343.33	-0.0970531	0.148099	-0.655325	0.512259	0.633151	BLOC1S1	N.S.
8506.89	0.116994	0.161753	0.72329	0.469502	0.594241	BLOC1S2	N.S.
1773.85	0.210025	0.107082	1.96135	0.0498377	0.101462	BLOC1S3	N.S.
2387.38	-0.264781	0.0907461	-2.91782	0.00352487	0.0103004	BLOC1S4	padj<0.05 & Downregulated
1103.87	0.107795	0.116686	0.923806	0.355588	0.485832	BLOC1S5	N.S.
151.71	-1.32768	0.793914	-1.67232	0.0944616	0.171857	BLOC1S5-TXNDC5	N.S.
4675.12	0.0335205	0.0954267	0.351269	0.725386	0.809385	BLOC1S6	N.S.
3083.83	0.063466	0.11861	0.535083	0.592593	0.702829	BLVRA	N.S.
12921.2	-0.471766	0.11757	-4.01266	6.00394e-05	0.000261964	BLVRB	padj<0.05 & Downregulated
3000.74	0.57708	0.108313	5.32788	9.93642e-08	6.57812e-07	BLZF1	padj<0.05 & Upregulated
561.049	-0.980267	0.190865	-5.13593	2.80754e-07	1.76227e-06	BMF	padj<0.05 & Downregulated
5282.47	-0.393682	0.137556	-2.86198	0.00421008	0.0120681	BMI1	padj<0.05 & Downregulated
9611.05	2.25917	0.132992	16.9873	1.02011e-64	7.66447e-63	BMP1	padj<0.05 & Upregulated
1.50701	4.06409	1.76578	2.30158	0.0213586	0.0495215	BMP10	padj<0.05 & Upregulated
0.479609	2.42178	3.06459	0.790248	0.429383	NA	BMP15	N.S.
720.126	0.69335	0.194382	3.56694	0.000361168	0.00134721	BMP2	padj<0.05 & Upregulated
1655.41	0.214738	0.127398	1.68557	0.0918788	0.16807	BMP2K	N.S.
198.152	-1.10265	0.232822	-4.73601	2.1797e-06	1.19366e-05	BMP3	padj<0.05 & Downregulated
1639.61	-0.298571	0.262333	-1.13814	0.255062	0.377482	BMP4	N.S.
18.5747	-0.180352	0.489973	-0.368086	0.712809	0.799497	BMP5	N.S.
137.002	1.92916	0.386194	4.99532	5.8739e-07	3.50991e-06	BMP6	padj<0.05 & Upregulated
3218.48	-0.51261	0.125151	-4.09593	4.20485e-05	0.000188709	BMP7	padj<0.05 & Downregulated
46.2768	-0.331392	0.391722	-0.845986	0.397561	0.526867	BMP8A	N.S.
1026.4	0.170889	0.189708	0.900801	0.367694	0.498028	BMP8B	N.S.
20.4455	-0.420213	0.51346	-0.818395	0.413132	0.54141	BMPER	N.S.
7356.16	-1.0627	0.195531	-5.43493	5.48193e-08	3.77243e-07	BMPR1A	padj<0.05 & Downregulated
2641.57	-1.26816	0.339009	-3.74077	0.000183457	0.000730432	BMPR1B	padj<0.05 & Downregulated
14718.7	-0.267519	0.167511	-1.59702	0.110261	0.194825	BMPR2	N.S.
7169.21	-0.216628	0.103307	-2.09694	0.0359987	0.077031	BMS1	N.S.
39.0481	3.61056	0.479953	7.52275	5.36379e-14	6.78985e-13	BMX	padj<0.05 & Upregulated
6.45702	0.482212	0.730473	0.660137	0.509166	0.630362	BNC1	N.S.
432.147	-0.187554	0.2225	-0.842938	0.399263	0.528449	BNC2	N.S.
1259.93	-0.111827	0.098198	-1.13879	0.254789	0.377174	BNIP1	N.S.
6118.78	0.180638	0.147185	1.22729	0.219713	0.33657	BNIP2	N.S.
7934.11	1.02212	0.115605	8.84151	9.44342e-19	1.6075e-17	BNIP3	padj<0.05 & Upregulated
10139.7	1.27513	0.135998	9.37605	6.84877e-21	1.32205e-19	BNIP3L	padj<0.05 & Upregulated
149.316	-0.0144565	0.419784	-0.034438	0.972528	0.98296	BNIPL	N.S.
357.995	0.338413	0.198148	1.70788	0.0876586	0.161776	BOC	N.S.
6180	-0.0588378	0.0798962	-0.736429	0.46147	0.587541	BOD1	N.S.
3405.82	0.380761	0.0757195	5.02857	4.94152e-07	2.9846e-06	BOD1L1	padj<0.05 & Upregulated
0.132922	-0.665912	3.53381	-0.18844	0.850532	NA	BOD1L2	N.S.
3140.85	0.00719537	0.180614	0.0398384	0.968222	0.980582	BOK	N.S.
1442.07	-0.411028	0.185734	-2.21299	0.0268985	0.0602426	BOLA1	N.S.
1273.94	-0.0933393	0.187436	-0.49798	0.618498	0.723803	BOLA2	N.S.
2414.07	-0.401838	0.166218	-2.41754	0.0156258	0.0378638	BOLA2B	padj<0.05 & Downregulated
3679.57	-0.416088	0.158922	-2.6182	0.00883958	0.0232157	BOLA3	padj<0.05 & Downregulated
4.50525	0.362904	0.92454	0.392523	0.694672	0.785471	BOLL	N.S.
7356.63	-0.418879	0.104322	-4.01524	5.93846e-05	0.000259562	BOP1	padj<0.05 & Downregulated
735.076	-1.02319	0.107871	-9.48534	2.41588e-21	4.75296e-20	BORA	padj<0.05 & Downregulated
683.936	-0.259026	0.12486	-2.07453	0.03803	0.0805566	BORCS5	N.S.
1961.56	-0.838344	0.147308	-5.69109	1.26231e-08	9.49235e-08	BORCS6	padj<0.05 & Downregulated
2210.49	0.306824	0.127537	2.40576	0.0161388	0.0389418	BORCS7	padj<0.05 & Upregulated
0	NA	NA	NA	NA	NA	BORCS7-ASMT	N.S.
1269.13	-0.342008	0.121286	-2.81986	0.00480449	0.0135733	BORCS8	padj<0.05 & Downregulated
537.786	0.184877	0.118811	1.55606	0.119693	0.208055	BORCS8-MEF2B	N.S.
2174.65	0.781939	0.13918	5.61817	1.92994e-08	1.41179e-07	BPGM	padj<0.05 & Upregulated
1858.59	-0.432603	0.119343	-3.62486	0.000289113	0.00110637	BPHL	padj<0.05 & Downregulated
0.913984	3.2917	2.54319	1.29432	0.195555	0.307452	BPI	N.S.
0	NA	NA	NA	NA	NA	BPIFA1	N.S.
1.17994	3.72037	2.32192	1.60228	0.109093	0.193292	BPIFA2	N.S.
0	NA	NA	NA	NA	NA	BPIFA3	N.S.
1.34612	3.90708	1.89664	2.06	0.0393989	0.0830526	BPIFB1	N.S.
0	NA	NA	NA	NA	NA	BPIFB2	N.S.
0	NA	NA	NA	NA	NA	BPIFB3	N.S.
0.157233	0.776761	3.53381	0.219808	0.826021	NA	BPIFB4	N.S.
0	NA	NA	NA	NA	NA	BPIFB6	N.S.
84.6735	9.87199	1.15424	8.55283	1.20107e-17	1.91545e-16	BPIFC	padj<0.05 & Upregulated
2833.74	-0.147337	0.100475	-1.4664	0.142539	0.238812	BPNT1	N.S.
7188.33	-0.175364	0.101815	-1.72237	0.0850026	0.157659	BPTF	N.S.
0	NA	NA	NA	NA	NA	BPY2	N.S.
0	NA	NA	NA	NA	NA	BPY2B	N.S.
0	NA	NA	NA	NA	NA	BPY2C	N.S.
2371.28	-0.0326974	0.121277	-0.26961	0.78746	0.856871	BRAF	N.S.
2941.8	0.195647	0.0933608	2.0956	0.0361181	0.0771916	BRAP	N.S.
7278.36	-0.508547	0.132642	-3.83398	0.000126084	0.000517122	BRAT1	padj<0.05 & Downregulated
1501.95	-1.14678	0.217931	-5.26213	1.42395e-07	9.26153e-07	BRCA1	padj<0.05 & Downregulated
716.365	-0.986532	0.257651	-3.82895	0.000128691	0.000526699	BRCA2	padj<0.05 & Downregulated
1410.41	-0.0518107	0.124217	-0.417098	0.676607	0.7714	BRCC3	N.S.
2982.3	0.182815	0.0777763	2.35052	0.0187471	0.0442434	BRD1	padj<0.05 & Upregulated
26020.4	0.0510421	0.116399	0.438511	0.661016	0.758337	BRD2	N.S.
3929.59	0.176661	0.131026	1.34829	0.177567	0.284508	BRD3	N.S.
7626.32	0.033686	0.100916	0.333801	0.73853	0.819684	BRD4	N.S.
8204.97	0.159526	0.127392	1.25225	0.21048	0.325659	BRD7	N.S.
5457.41	-0.0222878	0.146012	-0.152644	0.878679	0.920342	BRD8	N.S.
2920.26	-0.0524508	0.0894393	-0.58644	0.55758	0.673213	BRD9	N.S.
1.06043	0.822716	1.93423	0.425346	0.670585	0.766439	BRDT	N.S.
3199.63	0.455993	0.142519	3.19952	0.00137656	0.00447582	BRE	padj<0.05 & Upregulated
3483.4	-0.10554	0.140396	-0.75173	0.452213	0.578704	BRF1	N.S.
2250.18	0.0898384	0.132149	0.679825	0.496615	0.618876	BRF2	N.S.
10477.9	0.628464	0.166397	3.77689	0.000158796	0.000639551	BRI3	padj<0.05 & Upregulated
3428.79	-1.3541	0.177453	-7.63071	2.33459e-14	3.0301e-13	BRI3BP	padj<0.05 & Downregulated
269.784	0.298206	0.193302	1.54269	0.122905	0.212604	BRICD5	N.S.
110.548	-0.739399	0.238547	-3.0996	0.00193783	0.00606324	BRINP1	padj<0.05 & Downregulated
3.10956	-1.0772	1.28305	-0.839564	0.401153	0.530098	BRINP2	N.S.
70.252	-3.03245	0.53699	-5.64712	1.63162e-08	1.20614e-07	BRINP3	padj<0.05 & Downregulated
900.808	-1.09773	0.166564	-6.59044	4.38511e-11	4.21837e-10	BRIP1	padj<0.05 & Downregulated
4872.44	-0.417703	0.11532	-3.62211	0.000292207	0.00111699	BRIX1	padj<0.05 & Downregulated
13097.5	0.0710589	0.125704	0.565285	0.57188	0.685377	BRK1	N.S.
4657.14	0.0568483	0.104381	0.544623	0.586013	0.697731	BRMS1	N.S.
1519.43	-0.311474	0.0923425	-3.37303	0.000743469	0.00257847	BRMS1L	padj<0.05 & Downregulated
4806.13	0.494848	0.0964667	5.12973	2.90156e-07	1.81671e-06	BROX	padj<0.05 & Upregulated
2578.74	-0.210986	0.104493	-2.01914	0.0434731	0.0902871	BRPF1	N.S.
3849.28	0.295555	0.0833191	3.54727	0.000389249	0.00144116	BRPF3	padj<0.05 & Upregulated
0.236996	-1.37346	3.53192	-0.388872	0.697371	NA	BRS3	N.S.
1488.12	-0.58927	0.116086	-5.07615	3.85153e-07	2.36478e-06	BRSK1	padj<0.05 & Downregulated
2057.74	-0.562719	0.187427	-3.00234	0.0026791	0.00807111	BRSK2	padj<0.05 & Downregulated
3200.74	0.310913	0.106547	2.91808	0.00352192	0.0102935	BRWD1	padj<0.05 & Upregulated
1688.01	-0.474236	0.174225	-2.72197	0.00648948	0.017719	BRWD3	padj<0.05 & Downregulated
2347.89	-0.493778	0.195354	-2.52761	0.0114842	0.0291426	BSCL2	padj<0.05 & Downregulated
6526.05	0.380218	0.0774039	4.91213	9.00924e-07	5.24867e-06	BSDC1	padj<0.05 & Upregulated
47792.1	0.326026	0.146348	2.22774	0.0258977	0.0583535	BSG	N.S.
512.716	0.536282	0.177335	3.02412	0.00249358	0.00758032	BSN	padj<0.05 & Upregulated
0.960353	0.00117904	2.25761	0.000522252	0.999583	0.999755	BSND	N.S.
0.123055	0.776761	3.53381	0.219808	0.826021	NA	BSPH1	N.S.
1171.15	1.12707	0.307056	3.67057	0.000242006	0.000939721	BSPRY	padj<0.05 & Upregulated
29.5774	-0.507781	0.454485	-1.11727	0.26388	0.387474	BST1	N.S.
12182.4	8.21285	0.299705	27.4031	2.51815e-165	1.02079e-162	BST2	padj<0.05 & Upregulated
0	NA	NA	NA	NA	NA	BSX	N.S.
2837.38	-0.0265641	0.151506	-0.175334	0.860817	0.908487	BTAF1	N.S.
9385.28	-0.149002	0.0873376	-1.70605	0.0879989	0.16225	BTBD1	N.S.
4773.05	0.48166	0.114181	4.21838	2.4606e-05	0.00011462	BTBD10	padj<0.05 & Upregulated
95.1296	4.5497	0.485465	9.37184	7.12817e-21	1.37294e-19	BTBD11	padj<0.05 & Upregulated
9.55602	2.44973	0.671915	3.6459	0.00026646	0.00102713	BTBD16	padj<0.05 & Upregulated
1.46898	4.0176	2.21951	1.81013	0.0702752	0.134804	BTBD17	N.S.
3.1692	-0.19221	1.15056	-0.167059	0.867324	0.912556	BTBD18	N.S.
128.121	0.484978	0.337176	1.43835	0.150334	0.249435	BTBD19	N.S.
9772.86	-0.0764294	0.0896314	-0.852708	0.393821	0.523424	BTBD2	N.S.
5517.88	-0.197374	0.110648	-1.7838	0.0744556	0.141592	BTBD3	N.S.
23.6424	-0.131636	0.44616	-0.295043	0.767961	0.841378	BTBD6	N.S.
3569.39	0.00904687	0.0949222	0.0953083	0.92407	0.951247	BTBD7	N.S.
23.5739	0.121599	0.55983	0.217206	0.828048	0.884797	BTBD8	N.S.
1595.9	0.418953	0.0938843	4.46244	8.10318e-06	4.09766e-05	BTBD9	padj<0.05 & Upregulated
40.3894	1.87252	0.60275	3.10662	0.00189237	0.0059402	BTC	padj<0.05 & Upregulated
542.69	0.551814	0.118009	4.67604	2.92468e-06	1.5798e-05	BTD	padj<0.05 & Upregulated
47477.5	-0.129636	0.15215	-0.852025	0.3942	0.523648	BTF3	N.S.
6091.12	-0.100917	0.107536	-0.938448	0.348014	0.478447	BTF3L4	N.S.
2937.25	0.835612	0.242881	3.44041	0.000580823	0.00207381	BTG1	padj<0.05 & Upregulated
[truncated: 17,900 more rows]

## Sheet: B. Proteomics
uniprot	name	n_peptides	log2_FC	p	p.fdr
A0A0B4J2D5	GATD3B	8	-0.126279	0.0428182	0.240752
A0A1B0GTH6	CSNKA2IP	1	0.0231488	0.848608	1
A0A1B0GVH7	IQCM	1	-0.202917	0.134005	0.495557
A0AVT1	UBA6	33	-0.00365165	1	1
A0FGR8	ESYT2	9	0.05972	0.817064	1
A0JLT2	MED19	1	-0.00874773	0.927419	1
A0MZ66	SHTN1	9	-0.0176729	0.998697	1
A1L0T0	ILVBL	8	0.0735834	0.514851	0.986138
A1L188	NDUFAF8	1	0.152796	0.146469	0.520688
A1X283	SH3PXD2B	12	0.153581	0.00268076	0.0320516
A1XBS5	FAM92A	1	0.210062	0.308989	0.783001
A2RRP1	NBAS	2	0.0272292	0.865908	1
A3KMH1	VWA8	9	-0.0627121	0.736597	1
A3KN83	SBNO1	1	-0.258349	0.0431016	0.241057
A4D1E9	GTPBP10	3	-0.259444	0.00232307	0.0288595
A4D1P6	WDR91	2	-0.146479	0.1882	0.603821
A5PLN9	TRAPPC13	2	-0.078866	0.62341	1
A5YKK6	CNOT1	21	-0.00373945	1	1
A6NCE7	MAP1LC3B2	1	-0.118239	0.280354	0.746784
A6NDB9	PALM3	1	0.0308655	0.774764	1
A6NDG6	PGP	7	-0.104303	0.132249	0.491175
A6NDU8	C5orf51	5	0.00475116	0.999666	1
A6NED2	RCCD1	1	0.0283929	0.780982	1
A6NFE2	SMCO2	1	0.0542676	0.774272	1
A6NGG8	PCARE	1	0.591219	0.00758165	0.0723668
A6NHL2	TUBAL3	1	-0.0484564	0.656908	1
A6NHR9	SMCHD1	34	-0.0567284	0.820364	1
A6NIH7	UNC119B	2	-0.0724856	0.586306	1
A6NJ78	METTL15	1	-0.0877094	0.487292	0.963315
A8K979	ERI2	1	-0.0762768	0.449154	0.928631
A8MVJ9	Putative histone PARylation factor 1-like OS=Homo sapiens OX=9606 PE=5 SV=1	1	0.203885	0.239197	0.680248
A8MXV4	NUDT19	3	-0.00753113	0.989829	1
A8MZ25	Putative uncharacterized protein FLJ38767 OS=Homo sapiens OX=9606 PE=5 SV=1	1	-0.0250855	0.82264	1
A8MZF0	PRR33	1	0.143989	0.306073	0.779059
A9UHW6	MIF4GD	2	0.0944435	0.438867	0.920656
A9Z1Z3	FER1L4	1	0.222191	0.0508128	0.268562
B5ME19	EIF3CL	25	0.0284214	0.99879	1
B7ZAP0	RABGAP1L	2	-0.0315698	0.879308	1
B8ZZ34	SHISA8	1	-0.00891822	0.929271	1
C9JLW8	MCRIP1	5	-0.198388	0.045448	0.249998
E0CX11	STMP1	1	-0.141179	0.288831	0.758569
E9PAV3	NACA	6	-0.101886	0.450157	0.929632
E9PRG8	C11orf98	5	-0.082013	0.371469	0.853692
H7BZ55	CROCC2	1	-0.198266	0.0655994	0.317304
L0R6Q1	SLC35A4	4	-0.0558595	0.685375	1
L0R819	ASDURF	1	-0.189568	0.110536	0.4395
O00115	DNASE2	9	-0.120518	0.162703	0.555968
O00116	AGPS	21	0.0355888	0.995272	1
O00139	KIF2A	17	0.0411657	0.9493	1
O00142	TK2	1	0.0361091	0.790202	1
O00148	DDX39A	7	-0.198869	0.00554717	0.0568312
O00151	PDLIM1	12	0.460941	3.43546e-14	2.16208e-12
O00154	ACOT7	15	-0.0619834	0.672683	1
O00159	MYO1C	43	0.0986627	0.0161116	0.127095
O00161	SNAP23	8	-0.0161927	0.997208	1
O00165	HAX1	2	-0.0512607	0.718673	1
O00170	AIP	8	-0.0712063	0.542227	1
O00178	GTPBP1	8	0.118583	0.0804176	0.360369
O00186	STXBP3	13	-0.0205028	0.997507	1
O00192	ARVCF	1	0.258093	0.180419	0.59077
O00193	SMAP	4	-0.121747	0.307751	0.782223
O00203	AP3B1	28	-0.0340561	0.995929	1
O00214	LGALS8	4	0.485039	6.53594e-07	1.94955e-05
O00217	NDUFS8	9	-0.0887956	0.294126	0.76358
O00220	TNFRSF10A	1	0.0531315	0.584511	1
O00221	NFKBIE	1	0.31263	0.0876909	0.381308
O00231	PSMD11	28	-0.0810232	0.244574	0.688292
O00232	PSMD12	25	-0.0997491	0.0858902	0.375491
O00233	PSMD9	8	0.0222438	0.987389	1
O00244	ATOX1	5	0.104565	0.184442	0.597792
O00258	WRB	1	0.0828772	0.500293	0.974902
O00264	PGRMC1	5	0.0115105	0.993684	1
O00267	SUPT5H	22	-0.0431911	0.963693	1
O00268	TAF4	2	0.00828407	0.790062	1
O00273	DFFA	14	-0.113097	0.0648564	0.314773
O00287	RFXAP	2	-0.00688507	0.995958	1
O00291	HIP1	5	0.114039	0.104975	0.427273
O00299	CLIC1	18	0.074694	0.594832	1
O00303	EIF3F	11	0.000362112	1	1
O00330	PDHX	8	-0.148531	0.0102801	0.0904365
O00399	DCTN6	2	-0.0275261	0.848523	1
O00401	WASL	6	-0.00281139	1	1
O00409	FOXN3	1	0.226205	0.08535	0.3737
O00410	IPO5	33	0.0112981	1	1
O00411	POLRMT	7	-0.11367	0.161533	0.553619
O00418	EEF2K	3	0.113524	0.294074	0.76358
O00422	SAP18	9	-0.011761	0.999304	1
O00425	IGF2BP3	20	-0.0665884	0.844915	1
O00429	DNM1L	32	-0.0317465	0.998857	1
O00442	RTCA	9	0.0127609	0.998845	1
O00443	PIK3C2A	3	0.15419	0.0530103	0.276998
O00461	GOLIM4	10	-0.156653	0.010723	0.0934707
O00462	MANBA	1	0.0591603	0.696781	1
O00468	AGRN	16	0.491954	1.08758e-21	1.44851e-19
O00471	EXOC5	12	-0.0083814	0.999992	1
O00479	HMGN4	2	-0.302469	0.0183769	0.139212
O00483	NDUFA4	5	-0.16953	0.0114879	0.0984899
O00487	PSMD14	11	0.0250893	0.986412	1
O00488	ZNF593	2	-0.0421031	0.294964	0.765063
O00499	BIN1	2	0.346603	0.00866924	0.079438
O00505	KPNA3	5	-0.195212	0.00683601	0.0673835
O00506	STK25	1	0.0885269	0.48012	0.954803
O00512	BCL9	1	-0.147478	0.201773	0.624624
O00541	PES1	20	-0.0605579	0.75986	1
O00559	EBAG9	1	-0.223559	0.352318	0.832738
O00560	SDCBP	9	0.0669488	0.553591	1
O00562	PITPNM1	1	0.197512	0.0972988	0.406441
O00566	MPHOSPH10	12	-0.183698	0.000915514	0.0132738
O00567	NOP56	24	-0.0148644	0.999998	1
O00571	DDX3X	43	-0.120091	0.00160457	0.0210766
O00584	RNASET2	4	-0.168164	0.0275302	0.183759
O00592	PODXL	6	2.079	1.42249e-19	1.42923e-17
O00622	CYR61	3	0.355697	0.00056274	0.00875763
O00625	PIR	10	-0.0544304	0.687148	1
O00629	KPNA4	6	-0.0425898	0.885277	1
O00712	NFIB	2	-0.192651	0.0342222	0.207039
O00743	PPP6C	4	-0.037643	0.870413	1
O00746	NME4	1	-0.132834	0.217794	0.652948
O00748	CES2	1	1.29269	7.32499e-06	0.000177755
O00754	MAN2B1	11	0.0861079	0.218173	0.653149
O00764	PDXK	6	0.308568	2.56346e-05	0.000547797
O00767	SCD	1	-0.311401	0.0116101	0.0989453
O14497	ARID1A	15	0.0320468	0.985812	1
O14519	CDK2AP1	2	0.0557819	0.649148	1
O14521	SDHD	1	-0.154914	0.135078	0.498448
O14523	C2CD2L	1	-0.438162	0.00152168	0.0202196
O14524	NEMP1	3	-0.0239676	0.933918	1
O14530	TXNDC9	9	-0.0862225	0.247269	0.693506
O14531	DPYSL4	5	0.0270133	0.947683	1
O14545	TRAFD1	4	0.0925893	0.371674	0.85371
O14548	COX7A2L	5	-0.183058	0.0094672	0.0849509
O14561	NDUFAB1	4	-0.115513	0.216332	0.6507
O14562	UBFD1	7	0.0116291	0.997821	1
O14578	CIT	4	-0.103414	0.244479	0.688292
O14579	COPE	9	0.0260435	0.976215	1
O14613	CDC42EP2	3	0.263963	0.0314556	0.197529
O14617	AP3D1	24	-0.045324	0.947064	1
O14618	CCS	4	0.12099	0.150749	0.529252
O14640	DVL1	1	0.241583	0.064912	0.314776
O14641	DVL2	2	0.00475243	0.917077	1
O14646	CHD1	3	0.0360489	0.873406	1
O14647	CHD2	2	-0.0589867	0.630041	1
O14653	GOSR2	5	0.0876889	0.273341	0.733907
O14656	TOR1A	3	-0.0710173	0.479662	0.954803
O14657	TOR1B	5	0.0954396	0.478811	0.954803
O14662	STX16	2	0.112033	0.329191	0.807054
O14672	ADAM10	5	0.20362	0.0107393	0.0934707
O14681	EI24	2	-0.0422442	0.723601	1
O14686	KMT2D	1	-0.0136262	0.887947	1
O14727	APAF1	2	-0.0248421	0.830848	1
O14733	MAP2K7	1	0.0745899	0.475709	0.954295
O14734	ACOT8	1	-0.251759	0.115748	0.453724
O14737	PDCD5	7	-0.235076	0.000579901	0.00887993
O14744	PRMT5	22	-0.0860222	0.272219	0.733302
O14745	SLC9A3R1	9	0.184652	0.00321664	0.0370658
O14757	CHEK1	2	0.133974	0.128614	0.481785
O14763	TNFRSF10B	3	-0.216144	0.0365877	0.216913
O14772	FPGT	1	-0.0878516	0.499568	0.974902
O14773	TPP1	4	0.111981	0.218901	0.653962
O14776	TCERG1	22	-0.0386535	0.981089	1
O14777	NDC80	5	-0.0904291	0.428375	0.911616
O14787	TNPO2	5	-0.00711752	0.998607	1
O14802	POLR3A	7	-0.0840569	0.347574	0.828362
O14818	PSMA7	15	-0.0777566	0.408521	0.896055
O14828	SCAMP3	7	-0.0372999	0.938347	1
O14832	PHYH	1	0.00862473	0.931956	1
O14879	IFIT3	6	2.9106	5.03484e-26	8.0096e-24
O14880	MGST3	1	0.100746	0.443683	0.92631
O14893	GEMIN2	2	0.0267549	0.872641	1
O14907	TAX1BP3	3	0.116318	0.189803	0.606487
O14908	GIPC1	10	-0.123584	0.202961	0.626646
O14920	IKBKB	5	0.0188238	0.992096	1
O14925	TIMM23	3	-0.0552506	0.630904	1
O14929	HAT1	10	-0.113759	0.158208	0.545488
O14933	UBE2L6	3	0.992491	3.025e-08	1.10345e-06
O14936	CASK	2	0.00902938	0.991078	1
O14949	UQCRQ	2	0.0256296	0.874927	1
O14950	MYL12B	7	0.267345	1.52541e-05	0.000338605
O14957	UQCR11	1	0.00206752	0.987709	1
O14964	HGS	18	0.00850404	1	1
O14966	RAB29	3	0.0786687	0.39479	0.882154
O14967	CLGN	3	0.0697507	0.494184	0.969575
O14972	DSCR3	3	0.00202058	0.999229	1
O14974	PPP1R12A	21	-0.0194343	0.999947	1
O14976	GAK	12	-0.0482342	0.877463	1
O14979	HNRNPDL	13	-0.0765457	0.715081	1
O14980	XPO1	31	-0.0594049	0.922588	1
O14981	BTAF1	8	-0.0243271	0.979015	1
O15013	ARHGEF10	2	0.0124027	0.991409	1
O15014	ZNF609	1	0.0696629	0.500677	0.974902
O15027	SEC16A	10	-0.0153067	0.998374	1
O15031	PLXNB2	9	0.135424	0.0622725	0.305338
O15042	U2SURP	15	-0.0893231	0.904758	1
O15047	SETD1A	2	-0.0434119	0.845299	1
O15056	SYNJ2	1	0.245787	0.0556771	0.285093
O15061	SYNM	1	0.352792	0.00577648	0.0584486
O15066	KIF3B	6	-0.0753042	0.544908	1
O15067	PFAS	28	-0.0603174	0.795958	1
O15084	ANKRD28	1	0.123969	0.333385	0.811152
O15085	ARHGEF11	2	-0.0669386	0.55434	1
O15091	KIAA0391	3	-0.112268	0.220851	0.656023
O15111	CHUK	2	-0.243445	0.0219664	0.158042
O15116	LSM1	3	0.0250823	0.932802	1
O15118	NPC1	4	-0.0142879	0.976951	1
O15121	DEGS1	2	-0.0138953	0.922811	1
O15126	SCAMP1	4	-0.055268	0.663745	1
O15127	SCAMP2	4	-0.0113779	0.988418	1
O15143	ARPC1B	10	-0.0764061	0.447927	0.927295
O15144	ARPC2	16	-0.0458228	0.962666	1
O15145	ARPC3	9	-0.0578713	0.857338	1
O15155	BET1	1	0.0440788	0.657622	1
O15160	POLR1C	5	-0.0546328	0.826172	1
O15162	PLSCR1	1	1.40103	2.0321e-06	5.5951e-05
O15164	TRIM24	2	-0.162233	0.104508	0.426295
O15173	PGRMC2	3	0.115868	0.198721	0.622625
O15212	PFDN6	10	-0.127787	0.0370132	0.218305
O15213	WDR46	10	-0.0195643	0.99622	1
O15226	NKRF	12	-0.0557168	0.795175	1
O15228	GNPAT	3	-0.166237	0.0384798	0.2226
O15230	LAMA5	7	0.23526	0.00312525	0.0361582
O15231	ZNF185	1	0.0948785	0.532221	1
O15234	CASC3	1	0.0385184	0.721972	1
O15235	MRPS12	3	-0.122488	0.265763	0.724901
O15239	NDUFA1	1	-0.254316	0.0290669	0.188524
O15254	ACOX3	2	-0.0238498	0.824591	1
O15258	RER1	3	0.00937874	0.983318	1
O15260	SURF4	1	0.0498716	0.636952	1
O15269	SPTLC1	9	0.0561258	0.711542	1
O15270	SPTLC2	5	-0.0695938	0.503525	0.977712
O15294	OGT	14	-0.0559403	0.760122	1
O15305	PMM2	10	-0.112597	0.100424	0.41676
O15321	TM9SF1	1	0.049	0.646179	1
O15344	MID1	22	-0.327327	6.6255e-14	4.03662e-12
O15347	HMGB3	7	-0.0527671	0.758585	1
O15354	GPR37	1	0.122235	0.346307	0.827755
O15355	PPM1G	18	-0.113024	0.217924	0.652948
O15357	INPPL1	11	-0.0132677	0.999492	1
O15371	EIF3D	21	-0.00424552	1	1
O15372	EIF3H	13	-0.0472113	0.923959	1
O15379	HDAC3	1	0.199752	0.193027	0.614829
O15381	NVL	7	-0.0642979	0.638961	1
O15382	BCAT2	9	-0.0341151	0.938451	1
O15397	IPO8	1	0.0152521	0.902829	1
O15400	STX7	6	-0.0255117	0.952079	1
O15439	ABCC4	7	-0.105072	0.140566	0.509831
O15440	ABCC5	1	-0.0181119	0.852647	1
O15446	CD3EAP	6	-0.00802409	0.999878	1
O15460	P4HA2	21	0.104725	0.0638608	0.311525
O15498	YKT6	5	-0.0907347	0.439226	0.921072
O15511	ARPC5	7	-0.0463803	0.781992	1
O15514	POLR2D	4	-0.0190242	0.991511	1
O15530	PDPK1	2	0.169549	0.255932	0.706714
O15533	TAPBP	4	0.5207	3.36159e-07	1.03505e-05
O15541	RNF113A	5	-0.142379	0.0569079	0.288318
O43143	DHX15	30	-0.0883613	0.109913	0.438546
O43148	RNMT	7	0.0392417	0.890189	1
O43149	ZZEF1	3	0.0294818	0.863866	1
O43159	RRP8	6	0.00651397	0.999778	1
O43164	PJA2	1	0.046849	0.651578	1
O43166	SIPA1L1	2	0.401949	0.00360172	0.0404549
O43169	CYB5B	4	0.11658	0.461898	0.942861
O43172	PRPF4	12	0.0134289	0.999762	1
O43175	PHGDH	21	-0.0384081	0.991232	1
O43181	NDUFS4	6	-0.148717	0.030214	0.192048
O43182	ARHGAP6	1	-0.0143334	0.889469	1
O43237	DYNC1LI2	12	-0.029567	0.993202	1
O43242	PSMD3	27	-0.0563078	0.917135	1
O43251	RBFOX2	4	0.0552711	0.675954	1
O43252	PAPSS1	17	0.00101847	1	1
O43264	ZW10	7	-0.093996	0.312603	0.787281
O43290	SART1	13	-0.0247967	0.992978	1
O43291	SPINT2	3	0.252874	0.0337079	0.206188
O43292	GPAA1	2	0.00180763	0.991062	1
O43293	DAPK3	3	0.105598	0.235075	0.67689
O43299	AP5Z1	2	-0.01592	0.924238	1
O43301	HSPA12A	7	0.0886907	0.225485	0.663442
O43303	CCP110	1	0.0412214	0.701873	1
O43314	PPIP5K2	6	-0.00821586	0.998074	1
O43318	MAP3K7	4	0.0788831	0.490064	0.965794
O43324	EEF1E1	4	-0.136134	0.0706441	0.333299
O43325	LYRM1	1	-0.0607905	0.56807	1
O43347	MSI1	1	-0.0171921	0.894002	1
O43353	RIPK2	3	0.132923	0.108663	0.435793
O43390	HNRNPR	20	-0.0126252	0.999998	1
O43395	PRPF3	17	-0.127449	0.0375063	0.219855
O43396	TXNL1	11	-0.0511944	0.887304	1
O43399	TPD52L2	13	-0.0749939	0.406515	0.894396
O43402	EMC8	5	-0.0987252	0.293258	0.762768
O43414	ERI3	3	-0.0298263	0.91206	1
O43427	FIBP	1	0.127547	0.455109	0.934867
O43432	EIF4G3	10	-0.0205402	0.994432	1
O43447	PPIH	7	-0.157831	0.0200574	0.147543
O43448	KCNAB3	1	0.032695	0.732184	1
O43464	HTRA2	6	0.169582	0.00746329	0.0714753
O43488	AKR7A2	10	-0.00754617	0.999961	1
O43491	EPB41L2	35	0.129265	0.000578882	0.00887993
O43502	RAD51C	1	0.0119935	0.930893	1
O43504	LAMTOR5	2	0.00556845	0.992126	1
O43567	RNF13	3	0.0367494	0.842478	1
O43570	CA12	3	-0.105356	0.35574	0.836189
O43572	AKAP10	3	-0.0983758	0.288286	0.758184
O43583	DENR	6	-0.0826855	0.631641	1
O43592	XPOT	3	0.079983	0.482783	0.958038
O43598	DNPH1	10	0.00475435	0.999996	1
O43615	TIMM44	15	-0.169726	5.35648e-05	0.00106075
O43617	TRAPPC3	3	0.101045	0.278574	0.743886
O43633	CHMP2A	5	-0.193972	0.0115642	0.0987994
O43639	NCK2	1	0.00881519	0.927987	1
O43657	TSPAN6	1	0.0795489	0.442943	0.925815
O43660	PLRG1	6	0.0173261	0.990091	1
O43663	PRC1	2	-0.0266663	0.694126	1
O43665	RGS10	6	-0.0582436	0.752743	1
O43670	ZNF207	4	0.0049124	0.999073	1
O43674	NDUFB5	3	-0.221669	0.0306542	0.193985
O43676	NDUFB3	4	-0.145549	0.0752567	0.347297
O43678	NDUFA2	5	-0.0522538	0.762987	1
O43681	ASNA1	12	-0.0899655	0.204405	0.629186
O43684	BUB3	11	-0.0270783	0.981041	1
O43692	PI15	8	-0.339802	2.60199e-08	9.61394e-07
O43707	ACTN4	35	0.851914	3.1748e-61	1.51517e-58
O43708	GSTZ1	4	-0.0967482	0.267841	0.727323
O43709	BUD23	4	-0.162422	0.0578105	0.291444
O43715	TRIAP1	1	-0.413125	0.0056424	0.0574983
O43716	GATC	3	-0.104283	0.231024	0.671108
O43719	HTATSF1	8	0.0545398	0.720739	1
O43731	KDELR3	1	-0.219467	0.239035	0.680248
O43741	PRKAB2	1	0.00211494	0.982929	1
O43747	AP1G1	8	-0.042648	0.890552	1
O43752	STX6	2	-0.0419609	0.740101	1
O43759	SYNGR1	1	-0.034275	0.74511	1
O43765	SGTA	10	-0.0507934	0.843465	1
O43768	ENSA	5	-0.340582	0.000480839	0.00764935
O43772	SLC25A20	7	0.00233942	0.999995	1
O43776	NARS	25	-0.0617376	0.782239	1
O43795	MYO1B	1	0.438599	0.00191581	0.024274
O43805	SSNA1	2	-0.200206	0.0492771	0.263255
O43808	SLC25A17	1	0.218647	0.193537	0.615427
O43809	NUDT21	9	-0.0295633	0.964922	1
O43813	LANCL1	7	0.0018628	0.999998	1
O43815	STRN	11	-0.0274241	0.987418	1
O43818	RRP9	5	0.133746	0.125117	0.476428
O43819	SCO2	3	-0.130041	0.102893	0.422232
O43823	AKAP8	5	-0.0753972	0.435449	0.918195
O43824	GTPBP6	4	0.013287	0.985905	1
O43837	IDH3B	14	-0.152779	0.0032594	0.0374831
O43847	NRDC	10	-0.0780435	0.409138	0.896289
O43852	CALU	20	-0.0258389	0.99891	1
O43865	AHCYL1	8	-0.00888581	0.99962	1
O43896	KIF1C	4	-0.00555208	0.997972	1
O43913	ORC5	3	-0.0536499	0.789666	1
O43916	CHST1	1	0.30871	0.0331988	0.204221
O43920	NDUFS5	4	-0.0215019	0.958423	1
O43924	PDE6D	1	0.130094	0.29246	0.761506
O43929	ORC4	6	-0.130431	0.0630566	0.30839
O60216	RAD21	11	0.0446049	0.968196	1
O60220	TIMM8A	6	-0.192849	0.0106981	0.0934707
O60231	DHX16	3	-0.0520009	0.706564	1
O60232	SSSCA1	4	-0.0425815	0.800711	1
O60242	ADGRB3	1	0.00506394	0.966096	1
O60244	MED14	3	-0.0732524	0.42867	0.911616
O60256	PRPSAP2	10	-0.107213	0.131594	0.490014
O60264	SMARCA5	19	-0.0653117	0.615146	1
O60271	SPAG9	19	-0.0832191	0.317014	0.792651
O60287	URB1	1	0.220341	0.046603	0.252264
O60293	ZFC3H1	1	-0.0123652	0.906029	1
O60306	AQR	7	-0.0241273	0.970185	1
O60313	OPA1	26	-0.0931898	0.100879	0.418042
O60318	MCM3AP	1	-0.0386264	0.693593	1
O60333	KIF1B	2	-0.0806534	0.491862	0.967232
O60341	KDM1A	14	-0.0233115	0.995689	1
O60343	TBC1D4	3	-0.0658553	0.566523	1
O60427	FADS1	3	-0.0621865	0.551119	1
O60437	PPL	5	1.45164	4.86004e-16	3.52322e-14
O60443	GSDME	5	0.0309312	0.929723	1
O60476	MAN1A2	1	-0.213889	0.0627214	0.307013
O60488	ACSL4	4	0.15813	0.108585	0.435793
O60493	SNX3	9	-0.149563	0.032358	0.201648
O60499	STX10	2	-0.0334339	0.759754	1
O60502	MGEA5	12	0.000358399	1	1
O60504	SORBS3	3	0.369471	0.00949338	0.0849509
O60506	SYNCRIP	21	-0.161322	0.000109773	0.00200852
O60508	CDC40	1	-0.181575	0.105395	0.427781
O60518	RANBP6	1	0.0865649	0.483906	0.959594
O60524	NEMF	5	-0.1165	0.122671	0.470237
O60547	GMDS	4	0.243501	0.00280742	0.033288
O60551	NMT2	1	0.039155	0.691307	1
O60563	CCNT1	1	-0.0998748	0.392043	0.878802
O60566	BUB1B	1	-0.0424832	0.696316	1
O60568	PLOD3	13	-0.0195967	0.999494	1
O60573	EIF4E2	3	0.0918988	0.346827	0.82796
O60583	CCNT2	1	-0.179268	0.149793	0.527487
O60602	TLR5	1	0.200691	0.223657	0.661446
O60610	DIAPH1	25	-0.107956	0.0253826	0.174798
O60613	SELENOF	3	0.0248486	0.920215	1
O60637	TSPAN3	1	-0.0272086	0.807857	1
O60641	SNAP91	1	-0.411278	0.00604744	0.0606544
O60645	EXOC3	8	0.0769082	0.480756	0.955341
O60664	PLIN3	15	0.122682	0.0485034	0.259849
O60678	PRMT3	8	-0.133869	0.107231	0.433082
O60684	KPNA6	9	0.0120981	0.999637	1
O60701	UGDH	29	-0.0467396	0.917337	1
O60704	TPST2	1	0.322612	0.08126	0.362725
O60716	CTNND1	32	-0.0214562	0.999994	1
O60725	ICMT	1	-0.0953184	0.344382	0.825397
O60739	EIF1B	1	-0.275826	0.0402065	0.229345
O60749	SNX2	17	-0.0660625	0.477877	0.954796
O60762	DPM1	8	-0.0518351	0.726211	1
O60763	USO1	28	-0.106281	0.0833362	0.367694
O60783	MRPS14	1	-0.0661362	0.529863	0.998199
O60784	TOM1	7	0.137827	0.0546204	0.281659
O60814	HIST1H2BK	2	-0.198442	0.0615475	0.303194
O60825	PFKFB2	3	-0.146478	0.0663513	0.319613
O60826	CCDC22	12	0.0933966	0.206861	0.633809
O60828	PQBP1	3	-0.170308	0.0503008	0.266981
O60830	TIMM17B	2	-0.0455395	0.697344	1
O60831	PRAF2	2	0.0981253	0.391031	0.878802
O60832	DKC1	17	-0.0826354	0.429884	0.911616
O60841	EIF5B	36	-0.0773077	0.476036	0.954295
O60869	EDF1	4	-0.00634107	0.997464	1
O60870	KIN	1	0.231933	0.0642254	0.313037
O60884	DNAJA2	19	-0.115123	0.057687	0.291078
O60885	BRD4	2	-0.094354	0.331125	0.80868
O60888	CUTA	5	0.00684821	0.998805	1
O60890	OPHN1	1	0.582094	0.0158026	0.125002
O60911	CTSV	4	0.372078	0.000246698	0.00413112
O60921	HUS1	2	0.0504588	0.652229	1
O60925	PFDN1	6	-0.139591	0.0300927	0.19176
O60927	PPP1R11	1	-0.0280448	0.79534	1
O60934	NBN	7	-0.00310439	0.999985	1
O60936	NOL3	1	0.655355	0.00244602	0.029805
O60942	RNGTT	8	-0.109789	0.11621	0.454748
O75027	ABCB7	2	0.060832	0.581169	1
O75037	KIF21B	1	0.0301789	0.77723	1
O75044	SRGAP2	5	0.279237	0.00631546	0.0629019
O75056	SDC3	1	-0.187133	0.31419	0.789196
O75063	FAM20B	2	0.52367	0.00014919	0.00264524
O75083	WDR1	31	0.0138225	1	1
O75093	SLIT1	1	0.0347766	0.749911	1
O75096	LRP4	2	-0.00749547	0.973151	1
O75110	ATP9A	4	0.0138252	0.97997	1
O75113	N4BP1	1	0.0578037	0.56185	1
O75116	ROCK2	20	-0.0297351	0.998728	1
O75122	CLASP2	8	-0.0876162	0.44614	0.926476
O75131	CPNE3	23	-0.10156	0.107732	0.434492
O75146	HIP1R	4	0.043898	0.746373	1
O75150	RNF40	14	-0.131954	0.0212919	0.154504
O75151	PHF2	1	-0.0142647	0.897846	1
O75152	ZC3H11A	11	-0.134163	0.00895112	0.0813699
O75153	CLUH	21	-0.0812091	0.201342	0.624301
O75155	CAND2	10	0.0389164	0.909894	1
O75157	TSC22D2	4	-0.181606	0.0508765	0.268562
O75165	DNAJC13	12	0.004278	1	1
O75170	PPP6R2	4	0.132229	0.0871853	0.379415
O75175	CNOT3	7	-0.0313718	0.937729	1
O75177	SS18L1	1	-0.016971	0.859567	1
O75179	ANKRD17	8	-0.0509248	0.844016	1
O75190	DNAJB6	4	-0.167425	0.0225664	0.160944
O75208	COQ9	3	-0.224007	0.00838461	0.0779524
O75223	GGCT	7	-0.0409686	0.849695	1
O75251	NDUFS7	5	-0.0589224	0.597191	1
O75298	RTN2	1	-0.0945557	0.430499	0.912221
O75306	NDUFS2	13	-0.085329	0.421131	0.90611
O75312	ZPR1	16	-0.133832	0.0536938	0.279534
O75323	NIPSNAP2	6	-0.132117	0.0556705	0.285093
O75330	HMMR	4	-0.0716211	0.607152	1
O75339	CILP	1	-0.13897	0.278523	0.743886
O75340	PDCD6	7	-0.0661612	0.639396	1
O75347	TBCA	13	-0.0892637	0.169453	0.56858
O75348	ATP6V1G1	4	-0.00127164	0.999947	1
O75351	VPS4B	10	-0.0602056	0.601066	1
O75352	MPDU1	1	-0.00308091	0.97812	1
O75362	ZNF217	4	-0.0210854	0.9591	1
O75367	H2AFY	15	-0.0312468	0.983432	1
O75368	SH3BGRL	9	0.0172578	0.997762	1
O75369	FLNB	118	0.845215	8.57604e-189	4.9115e-185
O75376	NCOR1	4	0.128809	0.1203	0.465825
O75380	NDUFS6	5	-0.0706004	0.448279	0.927295
O75381	PEX14	3	-0.156682	0.0481171	0.25838
O75382	TRIM3	5	-0.0163652	0.986482	1
O75390	CS	21	-0.0505986	0.875356	1
O75391	SPAG7	5	-0.0837005	0.31935	0.794422
O75394	MRPL33	2	0.0391169	0.824188	1
O75396	SEC22B	10	0.021863	0.993402	1
O75400	PRPF40A	19	-0.0610118	0.708647	1
O75410	TACC1	1	0.0545261	0.704058	1
O75427	LRCH4	1	0.311569	0.0300598	0.19176
O75431	MTX2	10	-0.0368202	0.957685	1
O75436	VPS26A	8	0.0433781	0.849765	1
O75438	NDUFB1	1	-0.0711238	0.514187	0.985798
O75439	PMPCB	20	-0.0341649	0.99099	1
O75446	SAP30	1	0.092031	0.353749	0.834393
O75448	MED24	2	0.056419	0.698688	1
O75449	KATNA1	1	0.06927	0.584772	1
O75475	PSIP1	15	-0.106225	0.0398804	0.228395
O75477	ERLIN1	11	-0.0518768	0.768455	1
O75486	SUPT3H	1	0.0728067	0.467986	0.947887
O75487	GPC4	14	0.0614199	0.633582	1
O75489	NDUFS3	11	-0.0866554	0.270282	0.730489
O75494	SRSF10	5	-0.0328253	0.897723	1
O75503	CLN5	6	-0.0285592	0.942336	1
O75506	HSBP1	3	-0.139463	0.271106	0.732025
O75521	ECI2	13	-0.0929998	0.204332	0.629186
O75525	KHDRBS3	2	0.309289	0.00775713	0.0735515
O75529	TAF5L	1	0.227103	0.0865937	0.377414
O75530	EED	4	-0.121709	0.187472	0.602159
O75531	BANF1	9	0.0114571	0.999794	1
O75533	SF3B1	37	-0.0389362	0.994811	1
O75534	CSDE1	31	-0.173307	8.96447e-08	3.05592e-06
O75554	WBP4	1	-0.254686	0.0323047	0.201648
O75563	SKAP2	1	0.055251	0.596339	1
O75569	PRKRA	11	-0.0562302	0.723994	1
O75586	MED6	1	-0.222748	0.249355	0.695709
O75600	GCAT	1	0.0870926	0.41162	0.896859
O75607	NPM3	6	-0.0946655	0.490992	0.966411
O75608	LYPLA1	9	-0.0354214	0.917615	1
O75616	ERAL1	4	-0.262539	0.000620976	0.00947823
O75629	CREG1	3	-0.0339387	0.81734	1
O75643	SNRNP200	48	-0.00486996	1	1
O75648	TRMU	1	0.127754	0.321928	0.796407
O75663	TIPRL	9	-0.0742863	0.587585	1
O75665	OFD1	1	0.0671208	0.531169	0.999345
O75674	TOM1L1	4	-0.110215	0.211618	0.641914
O75683	SURF6	6	-0.0413859	0.771759	1
O75688	PPM1B	5	0.0359224	0.915013	1
O75689	ADAP1	1	-0.118282	0.345053	0.826137
O75691	UTP20	12	-0.0324091	0.976872	1
O75694	NUP155	19	-0.0750298	0.445246	0.926476
O75695	RP2	6	-0.0312035	0.920808	1
O75717	WDHD1	13	-0.255464	7.79819e-06	0.000185312
O75718	CRTAP	16	-0.0637521	0.710627	1
O75746	SLC25A12	19	-0.0819006	0.24754	0.693573
O75781	PALM	6	0.363633	7.69e-06	0.000183503
O75787	ATP6AP2	2	0.0169481	0.887951	1
O75792	RNASEH2A	4	-0.215781	0.0110904	0.0956551
O75794	CDC123	8	-0.22062	0.000143634	0.00256258
O75817	POP7	3	-0.0321653	0.843151	1
O75818	RPP40	1	0.0403829	0.694435	1
O75821	EIF3G	13	-0.105247	0.111454	0.441424
O75822	EIF3J	15	-0.139232	0.00782568	0.0739778
O75832	PSMD10	7	-0.0530273	0.725674	1
O75844	ZMPSTE24	9	-0.092393	0.179819	0.589909
O75864	PPP1R37	1	0.264141	0.0916158	0.390132
O75874	IDH1	18	-0.118264	0.0257253	0.17602
O75879	GATB	5	-0.046102	0.741774	1
O75880	SCO1	4	0.00178996	0.999865	1
O75884	RBBP9	3	0.0760112	0.446333	0.926476
O75886	STAM2	7	-0.0528715	0.757175	1
O75896	TUSC2	1	0.0190999	0.913696	1
O75901	RASSF9	2	0.106358	0.249002	0.695537
O75909	CCNK	1	0.0112153	0.913207	1
O75915	ARL6IP5	5	-0.0169423	0.980086	1
O75934	BCAS2	11	-0.0486057	0.869555	1
O75935	DCTN3	8	-0.0519012	0.833008	1
O75937	DNAJC8	9	-0.111302	0.236791	0.67689
O75940	SMNDC1	6	-0.162387	0.0361667	0.214861
O75947	ATP5H	15	-0.204863	3.46222e-06	9.1374e-05
O75953	DNAJB5	1	-0.219835	0.0862571	0.376233
O75955	FLOT1	19	0.0138307	0.999991	1
O75962	TRIO	4	0.195001	0.0104344	0.0916533
O75964	ATP5L	7	-0.148059	0.013352	0.110342
O75970	MPDZ	3	-0.0147369	0.969545	1
O75976	CPD	22	-0.1258	0.00798106	0.0748077
O76003	GLRX3	15	-0.042411	0.922908	1
O76021	RSL1D1	18	-0.107158	0.0995375	0.414003
O76024	WFS1	3	0.0481894	0.757454	1
O76031	CLPX	17	-0.191447	2.74125e-05	0.000579304
O76041	NEBL	1	0.0139294	0.921528	1
O76054	SEC14L2	4	1.23734	1.07859e-10	4.90246e-09
O76062	TM7SF2	1	-0.115914	0.347385	0.828362
O76070	SNCG	2	3.66572	6.60511e-12	3.20572e-10
O76071	CIAO1	4	-0.0693361	0.52231	0.993117
O76094	SRP72	32	-0.0517464	0.884769	1
O94760	DDAH1	2	0.116268	0.194944	0.616479
O94763	URI1	5	-0.0531908	0.733198	1
O94766	B3GAT3	4	0.0269326	0.918673	1
O94776	MTA2	14	-0.0407002	0.939072	1
O94782	USP1	1	-0.195684	0.0950996	0.399293
O94788	ALDH1A2	1	0.0973046	0.350576	0.831365
O94804	STK10	8	0.114868	0.0916579	0.390132
O94817	ATG12	1	-0.0704192	0.503877	0.977712
O94822	LTN1	3	-0.192859	0.0733408	0.342876
O94826	TOMM70	25	-0.0902746	0.0766008	0.350793
O94829	IPO13	1	0.0274821	0.793914	1
O94830	DDHD2	2	0.187867	0.137225	0.503775
O94842	TOX4	6	-0.0925896	0.388599	0.876819
O94854	KIAA0754	1	0.173527	0.179847	0.589909
O94855	SEC24D	7	0.0222481	0.981585	1
O94874	UFL1	19	0.00234814	1	1
O94876	TMCC1	3	-0.00978737	0.983699	1
O94880	PHF14	1	0.0147904	0.881963	1
O94887	FARP2	1	-0.109935	0.278414	0.743886
O94888	UBXN7	4	-0.024361	0.926155	1
O94901	SUN1	14	0.0130053	0.999958	1
O94903	PLPBP	6	0.0231989	0.964315	1
O94905	ERLIN2	14	-0.0783357	0.308247	0.782223
O94906	PRPF6	20	0.00216452	1	1
O94913	PCF11	1	-0.0699959	0.4935	0.969332
O94915	FRYL	1	-0.0518644	0.598041	1
O94916	NFAT5	4	0.0308098	0.895598	1
O94919	ENDOD1	6	0.0300731	0.923758	1
O94925	GLS	20	0.216527	7.1938e-07	2.12365e-05
O94927	HAUS5	1	0.0949982	0.350159	0.831065
O94964	SOGA1	2	-0.132905	0.171367	0.572589
O94966	USP19	4	-0.00435283	0.997074	1
O94973	AP2A2	17	0.0830275	0.245012	0.689187
O94979	SEC31A	32	-0.0189686	1	1
O94992	HEXIM1	11	0.000249141	1	1
O95059	RPP14	1	0.0218806	0.861953	1
O95070	YIF1A	1	0.0130369	0.9206	1
O95071	UBR5	15	0.0172671	0.999945	1
O95081	AGFG2	4	0.109293	0.223777	0.661446
O95104	SCAF4	5	-0.0304485	0.896593	1
O95139	NDUFB6	3	-0.205224	0.0126801	0.105858
O95140	MFN2	6	0.00681841	0.999977	1
O95149	SNUPN	1	0.0769204	0.568706	1
O95155	UBE4B	6	-0.0149602	0.991353	1
O95159	ZFPL1	4	0.122654	0.255461	0.706656
O95163	ELP1	5	-0.18961	0.00926689	0.0838412
O95166	GABARAP	1	-0.308357	0.0295687	0.190056
O95167	NDUFA3	3	-0.0896798	0.360892	0.841678
O95168	NDUFB4	6	0.049857	0.86197	1
O95169	NDUFB8	5	-0.0091673	0.996935	1
O95171	SCEL	1	0.891471	0.00485461	0.0511072
O95178	NDUFB2	1	0.0888152	0.476398	0.954295
O95182	NDUFA7	7	-0.0984687	0.149353	0.52652
O95197	RTN3	2	-0.119591	0.236019	0.67689
O95202	LETM1	27	-0.14813	7.29767e-06	0.000177755
O95208	EPN2	1	0.117077	0.278211	0.743886
O95210	STBD1	1	-0.0543868	0.674602	1
O95218	ZRANB2	2	-0.140148	0.642912	1
O95219	SNX4	12	0.0258331	0.99105	1
O95229	ZWINT	1	-0.0927612	0.445964	0.926476
O95232	LUC7L3	12	-0.0891428	0.478947	0.954803
O95235	KIF20A	1	-0.120652	0.266678	0.726242
O95248	SBF1	1	0.268418	0.142953	0.514254
O95249	GOSR1	3	0.0119091	0.972192	1
O95251	KAT7	2	0.0729191	0.575167	1
O95260	ATE1	1	-0.0170484	0.876204	1
O95292	VAPB	10	-0.0834277	0.355591	0.836189
O95295	SNAPIN	4	0.0686588	0.546607	1
O95297	MPZL1	4	0.0298232	0.914897	1
O95298	NDUFC2	3	-0.0619263	0.564326	1
O95299	NDUFA10	14	-0.14155	0.0056019	0.0572894
O95302	FKBP9	15	-0.0590936	0.636053	1
O95319	CELF2	7	0.0229304	0.972321	1
O95336	PGLS	14	0.0656571	0.585326	1
O95340	PAPSS2	6	0.0306486	0.926828	1
O95347	SMC2	31	-0.233191	1.57163e-12	8.25756e-11
O95352	ATG7	2	0.0233621	0.915074	1
O95359	TACC2	1	0.188879	0.0747784	0.346385
O95361	TRIM16	1	2.47779	7.70637e-07	2.2633e-05
O95363	FARS2	2	-0.012049	0.96738	1
O95372	LYPLA2	9	-0.0920263	0.20858	0.636409
O95373	IPO7	13	-0.0102215	0.99998	1
O95376	ARIH2	1	0.0705811	0.514622	0.98603
O95391	SLU7	1	0.325103	0.048139	0.25838
O95394	PGM3	15	0.033969	0.989699	1
O95396	MOCS3	1	0.276785	0.017523	0.134523
O95400	CD2BP2	8	-0.110512	0.0837979	0.368595
O95425	SVIL	5	1.38385	2.2612e-15	1.5058e-13
O95427	PIGN	2	0.0861095	0.556304	1
O95429	BAG4	2	0.00871232	0.987625	1
O95433	AHSA1	21	-0.110551	0.0240473	0.168427
O95445	APOM	2	0.085627	0.603912	1
O95453	PARN	12	-0.123968	0.0544416	0.28165
O95456	PSMG1	6	-0.0869043	0.469045	0.948787
O95470	SGPL1	12	0.154852	0.00574207	0.0583065
O95477	ABCA1	1	-0.00814176	0.974276	1
O95478	NSA2	5	-0.0859058	0.447623	0.927295
O95479	H6PD	6	0.212264	0.0036397	0.040712
O95486	SEC24A	8	0.0509085	0.841453	1
O95487	SEC24B	4	0.0334501	0.871056	1
O95490	ADGRL2	25	-0.273042	1.87502e-10	8.19711e-09
O95498	VNN2	1	0.0564723	0.557278	1
O95563	MPC2	1	-0.171994	0.110276	0.439187
O95571	ETHE1	11	0.166356	0.114505	0.450541
O95573	ACSL3	19	0.0755782	0.577656	1
O95602	POLR1A	14	-0.127144	0.0148439	0.120242
O95613	PCNT	1	0.13803	0.223696	0.661446
O95628	CNOT4	3	0.0381442	0.791008	1
O95630	STAMBP	8	0.00396013	0.999996	1
O95639	CPSF4	5	-0.0181183	0.982969	1
O95671	ASMTL	12	-0.0819804	0.40872	0.896149
O95674	CDS2	2	0.0806295	0.392335	0.878802
O95684	FGFR1OP	1	-0.251109	0.119779	0.464438
O95707	POP4	3	-0.0387154	0.770663	1
O95714	HERC2	4	0.201835	0.0299099	0.191604
O95721	SNAP29	8	-0.0275733	0.966627	1
O95747	OXSR1	13	0.07292	0.551594	1
O95749	GGPS1	2	-0.0224546	0.873691	1
O95757	HSPA4L	32	-0.115927	0.0198137	0.146669
O95758	PTBP3	4	-0.0145991	1	1
O95777	LSM8	4	0.0728922	0.534569	1
O95782	AP2A1	18	0.117622	0.0568804	0.288318
O95785	WIZ	8	-0.104781	0.158981	0.547164
O95786	DDX58	14	1.20315	1.4017e-31	3.64888e-29
O95793	STAU1	10	-0.0509867	0.76347	1
O95801	TTC4	6	-0.0587375	0.696122	1
O95816	BAG2	8	0.0899635	0.258237	0.711705
O95817	BAG3	8	0.120194	0.093524	0.395372
O95819	MAP4K4	10	0.150001	0.0425363	0.240005
O95822	MLYCD	2	0.166002	0.241245	0.684644
O95825	CRYZL1	6	-0.00306834	0.999976	1
O95831	AIFM1	18	-0.0972182	0.0879532	0.381308
O95834	EML2	3	0.0660372	0.539648	1
O95861	BPNT1	11	-0.0586127	0.630081	1
O95865	DDAH2	10	0.101663	0.32089	0.795877
O95870	ABHD16A	3	0.298728	0.00543552	0.0559878
O95881	TXNDC12	7	-0.147452	0.0213205	0.154504
O95900	TRUB2	1	0.0362913	0.73437	1
O95905	ECD	3	0.0446323	0.789781	1
O95926	SYF2	1	-0.293455	0.0458342	0.250709
O95931	CBX7	1	-0.221288	0.0455297	0.249998
O95983	MBD3	3	0.0817833	0.481677	0.956838
O95985	TOP3B	3	-0.0203229	0.937069	1
O95989	NUDT3	2	-0.0499456	0.908828	1
O95999	BCL10	3	0.0020585	0.999119	1
O96000	NDUFB10	12	-0.156341	0.00425787	0.0458361
O96005	CLPTM1	4	-0.0733914	0.515087	0.986259
O96006	ZBED1	1	0.102133	0.375782	0.858437
O96007	MOCS2	2	0.125605	0.238922	0.680248
O96008	TOMM40	9	-0.151818	0.0200691	0.147543
O96011	PEX11B	2	0.100455	0.398228	0.884659
O96013	PAK4	6	-0.0597395	0.635733	1
O96017	CHEK2	2	-0.0265077	0.80941	1
O96019	ACTL6A	11	-0.0468117	0.818629	1
O96028	NSD2	3	-0.0756164	0.477392	0.954796
O96033	MOCS2	2	-0.238054	0.0228298	0.162418
P00167	CYB5A	2	0.0485349	0.702798	1
P00338	LDHA	24	0.0421964	0.998953	1
P00352	ALDH1A1	27	-0.139338	0.00152654	0.0202372
P00367	GLUD1	9	0.0248798	0.991255	1
P00374	DHFR	5	-0.318871	8.42893e-06	0.000197838
P00387	CYB5R3	16	0.053885	0.82504	1
P00390	GSR	20	-0.0195314	0.999983	1
P00395	MT-CO1	2	-0.00802005	0.971059	1
P00403	MT-CO2	5	-0.011606	0.992558	1
P00441	SOD1	10	0.0314538	0.961992	1
P00488	F13A1	2	0.014358	0.952165	1
P00491	PNP	8	-0.131749	0.0325423	0.202303
P00492	HPRT1	13	-0.0546342	0.806343	1
P00505	GOT2	24	-0.198981	2.35611e-07	7.49635e-06
P00533	EGFR	1	-0.039784	0.764047	1
P00558	PGK1	24	-0.079533	0.284575	0.75382
P00568	AK1	10	-0.096427	0.189341	0.606212
P00734	F2	7	0.0917181	0.41936	0.904506
P00740	F9	1	0.12491	0.471581	0.949844
P00747	PLG	2	0.101734	0.278679	0.743886
P00813	ADA	1	0.217014	0.0565778	0.287667
P00846	MT-ATP6	1	-0.195834	0.0736527	0.3436
P00918	CA2	15	-0.522486	9.80844e-22	1.33745e-19
P00966	ASS1	1	-0.0528803	0.70373	1
P01023	A2M	6	0.0922307	0.272965	0.733907
P01024	C3	7	0.165774	0.00800592	0.0749181
P01034	CST3	1	0.141851	0.211281	0.641342
P01042	KNG1	1	0.240895	0.128627	0.481785
P01111	NRAS	1	-0.190658	0.0887683	0.383102
P01116	KRAS	1	-0.173738	0.178933	0.588597
P01130	LDLR	7	-0.00249105	0.999998	1
P01889	HLA-B	3	1.45332	1.81708e-10	8.00492e-09
P01892	HLA-A	9	0.967197	3.14453e-18	2.90464e-16
P02042	HBD	1	-0.0222338	0.878602	1
P02100	HBE1	1	-0.0124281	0.924826	1
P02461	COL3A1	9	-0.143772	0.0199367	0.147326
P02511	CRYAB	19	0.37934	4.07084e-12	2.0098e-10
P02533	KRT14	1	1.85919	3.71606e-05	0.000762791
P02538	KRT6A	20	3.55457	3.14478e-67	2.25127e-64
P02545	LMNA	58	0.481428	6.11337e-62	3.50112e-59
P02649	APOE	17	0.218858	8.9033e-05	0.00167728
P02656	APOC3	1	-0.229101	0.0749775	0.346567
P02749	APOH	3	-0.135254	0.135641	0.499561
P02751	FN1	4	0.220662	0.0542633	0.281236
P02765	AHSG	3	0.0966362	0.409297	0.896289
P02766	TTR	2	0.143545	0.194182	0.616036
P02771	AFP	4	0.171623	0.0306364	0.193985
P02774	GC	7	0.0931163	0.194555	0.616479
P02786	TFRC	35	-0.33132	3.90315e-27	6.98541e-25
P02787	TF	1	0.208617	0.101634	0.419577
P02790	HPX	1	0.0940781	0.363613	0.843764
P02792	FTL	2	-0.140789	0.245734	0.690877
P02794	FTH1	4	0.433969	2.11336e-06	5.79102e-05
P02795	MT2A	1	2.50612	9.94686e-08	3.37075e-06
P03886	MT-ND1	1	-0.120002	0.314457	0.789521
P03915	MT-ND5	1	-0.103182	0.304287	0.777103
P03928	MT-ATP8	3	-0.151041	0.0700056	0.331889
P04003	C4BPA	1	-0.172509	0.131992	0.490856
P04004	VTN	2	-0.10227	0.541929	1
P04035	HMGCR	1	-0.0342683	0.777069	1
P04040	CAT	15	-0.276177	4.2678e-09	1.69538e-07
P04049	RAF1	5	0.00677632	0.998486	1
P04062	GBA	11	0.109732	0.0501351	0.266711
P04066	FUCA1	7	0.0519459	0.733779	1
P04075	ALDOA	21	0.119353	0.108963	0.436691
P04080	CSTB	6	0.0617915	0.611373	1
P04083	ANXA1	20	0.607428	2.06715e-21	2.51885e-19
P04114	APOB	9	0.0424454	0.892593	1
P04179	SOD2	9	0.246751	0.000440641	0.00704902
P04181	OAT	27	-0.140311	0.000822497	0.0121091
P04183	TK1	3	-0.024394	0.909703	1
P04216	THY1	3	-0.179009	0.043653	0.243428
P04217	A1BG	1	0.288001	0.084568	0.371412
P04350	TUBB4A	5	-0.0777631	0.487818	0.964021
P04406	GAPDH	29	-0.0196837	1	1
P04424	ASL	4	0.0126933	0.984188	1
P04626	ERBB2	6	-0.0209842	0.979381	1
P04632	CAPNS1	13	0.17479	0.00016358	0.00285617
P04792	HSPB1	12	0.409222	9.48207e-12	4.52532e-10
P04818	TYMS	6	-0.15724	0.0529133	0.276997
P04843	RPN1	37	-0.0550264	0.965938	1
P04844	RPN2	16	-0.0546229	0.747355	1
P04899	GNAI2	8	0.219582	0.00130391	0.0177797
P04920	SLC4A2	5	-0.0735573	0.573212	1
P05023	ATP1A1	21	-0.0617465	0.596239	1
P05026	ATP1B1	7	-0.205484	0.0112506	0.096745
P05067	APP	7	0.159088	0.0266098	0.17971
P05089	ARG1	1	-0.117253	0.268165	0.727728
P05114	HMGN1	3	-0.193883	0.123746	0.472263
P05141	SLC25A5	8	-0.149293	0.0295225	0.190056
P05154	SERPINA5	1	0.0403296	0.673771	1
P05161	ISG15	6	1.23896	1.82148e-17	1.49023e-15
P05165	PCCA	10	-0.0109119	0.999808	1
P05166	PCCB	11	0.104559	0.317213	0.792651
P05186	ALPL	1	3.49772	6.96666e-08	2.41807e-06
P05198	EIF2S1	20	-0.0206452	0.999887	1
P05204	HMGN2	1	-0.517425	0.00686806	0.0675734
P05230	FGF1	1	3.28503	2.5378e-07	8.02981e-06
P05386	RPLP1	4	-0.0930602	0.347544	0.828362
P05387	RPLP2	7	-0.149013	0.0208307	0.152359
P05388	RPLP0	18	-0.0560844	0.705413	1
P05412	JUN	1	0.572338	0.00279152	0.0331682
P05423	POLR3D	1	-0.129297	0.215951	0.650238
P05452	CLEC3B	3	0.246947	0.0283815	0.186313
P05455	SSB	34	-0.0771841	0.881886	1
P05543	SERPINA7	1	0.00667246	0.944847	1
P05556	ITGB1	24	0.181806	4.85191e-06	0.000124605
P05783	KRT18	15	2.84347	2.93104e-47	1.29124e-44
P05787	KRT8	20	3.52988	1.14376e-61	5.95485e-59
P05937	CALB1	12	-0.00124149	1	1
P05997	COL5A2	31	-0.131994	8.99006e-05	0.00168807
P06132	UROD	8	0.091337	0.311064	0.785131
P06280	GLA	10	-0.0342333	0.944245	1
P06400	RB1	5	-0.0609512	0.626412	1
P06454	PTMA	2	-0.0486028	0.667823	1
P06493	CDK1	8	-0.366128	4.05409e-06	0.000105535
P06576	ATP5F1B	33	-0.118996	0.000721753	0.0108206
P06730	EIF4E	8	-0.097293	0.158176	0.545488
P06733	ENO1	30	0.00934796	1	1
P06737	PYGL	40	-0.0118767	1	1
P06744	GPI	25	-0.0954201	0.0572854	0.289623
P06746	POLB	3	0.0726087	0.460408	0.941692
P06748	NPM1	15	-0.11698	0.0796587	0.358652
P06753	TPM3	7	0.0812081	0.309451	0.783689
P06756	ITGAV	34	0.207285	3.37219e-11	1.58299e-09
P06865	HEXA	11	0.0569962	0.831763	1
P06899	HIST1H2BJ	2	-0.0692064	0.510838	0.983774
P07099	EPHX1	26	0.11753	0.0272375	0.182444
P07108	DBI	5	-0.136554	0.099543	0.414003
P07148	FABP1	1	0.0934039	0.348433	0.829619
P07195	LDHB	20	-0.278804	1.34756e-09	5.55212e-08
P07196	NEFL	4	-0.684208	2.32177e-06	6.30178e-05
P07197	NEFM	1	0.146173	0.355432	0.836189
P07199	CENPB	1	-0.100221	0.381619	0.866931
P07203	GPX1	1	-0.0886351	0.385366	0.872329
P07205	PGK2	1	-0.0442897	0.649074	1
P07237	P4HB	43	-0.112457	0.00278674	0.0331682
P07305	H1F0	6	0.185079	0.0130037	0.107949
P07311	ACYP1	6	-0.0708526	0.449871	0.929441
P07355	ANXA2	39	0.298526	4.27594e-23	6.12207e-21
P07384	CAPN1	23	-0.131247	0.00999148	0.0881682
P07437	TUBB	5	-0.0712728	0.526552	0.996371
P07602	PSAP	29	0.0119108	1	1
P07686	HEXB	23	-0.0399288	0.993475	1
P07711	CTSL	2	0.123816	0.235943	0.67689
P07737	PFN1	12	-0.0770451	0.423439	0.908511
P07738	BPGM	8	0.122145	0.309535	0.783689
P07741	APRT	16	-0.0466248	0.913635	1
P07814	EPRS	75	-0.0732903	0.729289	1
P07858	CTSB	10	0.600621	1.89441e-14	1.20548e-12
P07900	HSP90AA1	32	0.0214824	0.999999	1
P07910	HNRNPC	16	-0.0875572	0.298481	0.769425
P07919	UQCRH	2	-0.0440509	0.656825	1
P07947	YES1	4	-0.0579061	0.69189	1
P07948	LYN	3	0.00922393	0.984064	1
P07951	TPM2	9	-0.0832531	0.621017	1
P07954	FH	25	-0.20647	2.14302e-10	9.29776e-09
P07992	ERCC1	2	-0.131821	0.277263	0.743108
P07996	THBS1	21	0.527656	1.27113e-22	1.77555e-20
P08047	SP1	4	-0.0505806	0.794944	1
P08133	ANXA6	36	0.166499	2.69472e-07	8.4795e-06
P08134	RHOC	2	0.118866	0.346784	0.82796
P08183	ABCB1	1	-0.0529375	0.714477	1
P08195	SLC3A2	22	0.0324807	0.996579	1
P08237	PFKM	18	-0.224196	4.40601e-08	1.5576e-06
P08238	HSP90AB1	39	-0.0632567	0.778575	1
P08240	SRPRA	21	-0.0707175	0.376484	0.858671
P08243	ASNS	22	-0.070158	0.560559	1
P08247	SYP	1	-0.116195	0.2867	0.757348
P08263	GSTA1	1	-0.0126812	0.916416	1
P08397	HMBS	10	-0.0975934	0.204194	0.629186
P08559	PDHA1	23	0.0125011	1	1
P08574	CYC1	7	0.00580497	0.999947	1
P08579	SNRPB2	4	-0.0405269	0.781234	1
P08621	SNRNP70	18	-0.0245513	0.9987	1
P08648	ITGA5	2	0.203342	0.0338099	0.206208
P08651	NFIC	1	-0.0232634	0.831711	1
P08670	VIM	50	0.188287	3.97674e-08	1.41458e-06
P08697	SERPINF2	1	0.190009	0.181844	0.593739
P08708	RPS17	10	-0.137125	0.0211584	0.153774
P08727	KRT19	1	0.153391	0.148123	0.523642
P08754	GNAI3	5	0.0552299	0.795652	1
P08758	ANXA5	18	0.378821	1.08521e-15	7.57926e-14
P08779	KRT16	3	2.71164	3.91329e-13	2.21895e-11
P08865	RPSA	15	-0.0203007	0.998683	1
P08962	CD63	4	0.148699	0.0562461	0.287096
P09001	MRPL3	6	-0.0994511	0.21229	0.643274
P09012	SNRPA	5	0.0627234	0.668365	1
P09038	FGF2	7	0.0366674	0.962506	1
P09104	ENO2	1	0.185323	0.163479	0.557953
P09110	ACAA1	11	0.101444	0.126983	0.47944
P09132	SRP19	6	-0.0492315	0.757125	1
P09211	GSTP1	14	0.0334529	0.98074	1
P09234	SNRPC	4	0.0011599	1	1
P09382	LGALS1	15	0.0797727	0.720646	1
P09417	QDPR	6	0.0463304	0.764536	1
P09429	HMGB1	11	-0.146417	0.0309789	0.195824
P09486	SPARC	1	1.02113	0.000749276	0.0111539
P09493	TPM1	4	0.568639	9.91e-06	0.000228849
P09496	CLTA	9	-0.119641	0.0709058	0.334071
P09497	CLTB	8	0.148983	0.018146	0.137828
P09525	ANXA4	20	0.411914	1.73758e-18	1.68664e-16
P09543	CNP	22	0.422758	1.18124e-21	1.53749e-19
P09601	HMOX1	12	0.711483	2.18611e-12	1.11785e-10
P09622	DLD	24	-0.0619695	0.757887	1
P09651	HNRNPA1	15	-0.000495754	1	1
P09661	SNRPA1	16	-0.0512306	0.874853	1
P09668	CTSH	3	0.0610394	0.541489	1
P09669	COX6C	5	-0.219914	0.00293388	0.0344309
P09874	PARP1	58	-0.102577	0.0780272	0.355216
P09884	POLA1	3	0.0400367	0.776623	1
P09913	IFIT2	1	2.42053	5.20654e-08	1.82932e-06
P09914	IFIT1	7	2.3967	3.50173e-27	6.46916e-25
P09936	UCHL1	13	0.0537109	0.726602	1
P09960	LTA4H	26	-0.0734519	0.424593	0.909016
P09972	ALDOC	2	0.0715905	0.536778	1
P0C0S5	H2AFZ	3	-0.0534805	0.636551	1
P0C7P0	CISD3	2	-0.0799645	0.453803	0.933523
P0C7U0	ELFN1	1	0.0271071	0.817994	1
P0CB47	UBTFL1	1	0.397688	0.00425468	0.0458361
P0CG08	GPR89B	1	-0.0544532	0.723816	1
P0CG12	CHTF8	2	0.0150212	0.920912	1
P0CW20	LIMS4	2	0.912804	6.88146e-06	0.000169142
P0DI82	TRAPPC2B	1	-0.256555	0.0389037	0.223921
P0DMU9	CT45A10	9	-0.304934	2.64028e-05	0.000560032
P0DMV9	HSPA1B	42	-0.0601629	0.953369	1
P0DN79	CBSL	13	0.0289564	0.983655	1
P0DP25	CALM3	13	0.100036	0.234676	0.67689
P0DPB6	POLR1D	2	-0.108625	0.313691	0.788823
P10109	FDX1	6	-0.498999	1.29717e-09	5.38326e-08
P10155	TROVE2	20	0.038248	0.987832	1
P10176	COX8A	1	-0.17044	0.101598	0.419577
P10243	MYBL1	1	0.107792	0.361926	0.841896
P10253	GAA	21	0.104364	0.0693068	0.329394
P10301	RRAS	9	0.102205	0.153962	0.536013
P10321	HLA-C	4	0.825829	6.94747e-10	2.9256e-08
P10398	ARAF	8	-0.0351193	0.932151	1
P10515	DLAT	19	-0.104198	0.0387463	0.22369
P10586	PTPRF	5	0.101654	0.206777	0.633809
P10589	NR2F1	1	-0.00865116	0.927411	1
P10599	TXN	8	-0.00431746	0.999997	1
P10606	COX5B	7	-0.11351	0.119022	0.463139
P10619	CTSA	7	-0.0770076	0.387417	0.875586
P10620	MGST1	2	0.0636342	0.571526	1
P10636	MAPT	6	-0.117848	0.375283	0.858437
P10644	PRKAR1A	17	-0.00824009	0.999999	1
P10646	TFPI	3	0.0546824	0.717154	1
P10746	UROS	2	-0.074649	0.519928	0.991221
P10768	ESD	16	-0.0130431	0.999992	1
P10809	HSPD1	62	-0.161401	1.55538e-08	5.822e-07
P10915	HAPLN1	4	-0.0550424	0.709369	1
P11021	HSPA5	49	-0.0762511	0.709653	1
P11047	LAMC1	47	0.0646735	0.927316	1
P11117	ACP2	7	0.0760406	0.520222	0.991416
P11137	MAP2	22	-0.295775	2.53302e-12	1.28377e-10
P11142	HSPA8	34	-0.116928	0.0153556	0.122995
P11171	EPB41	1	-0.0180785	0.856934	1
P11172	UMPS	18	-0.043194	0.932431	1
P11177	PDHB	14	-0.0142613	0.999921	1
P11182	DBT	15	-0.0867154	0.185482	0.599127
P11216	PYGB	24	0.356539	8.26615e-21	9.2824e-19
P11233	RALA	1	0.0872332	0.404039	0.892305
P11234	RALB	2	0.040066	0.693252	1
P11277	SPTB	1	0.0827284	0.543439	1
P11279	LAMP1	8	-0.0666525	0.509238	0.982957
P11310	ACADM	10	-0.120964	0.0370099	0.218305
P11387	TOP1	23	-0.147056	0.000749825	0.0111539
P11388	TOP2A	27	-0.16025	0.000122869	0.0022128
P11413	G6PD	19	0.385418	3.99927e-17	3.18108e-15
P11441	UBL4A	7	0.0144317	0.996332	1
P11498	PC	3	0.110568	0.293927	0.76358
P11586	MTHFD1	51	-0.0816824	0.225255	0.663442
P11717	IGF2R	49	-0.0534671	0.887522	1
P11766	ADH5	12	-0.0421171	0.902267	1
P11802	CDK4	7	0.0220154	0.976	1
P11831	SRF	1	-0.0903947	0.381187	0.866592
P11908	PRPS2	8	-0.13002	0.0529673	0.276998
P11940	PABPC1	22	-0.0700984	0.695422	1
P12004	PCNA	21	-0.20737	2.57392e-06	6.95322e-05
P12036	NEFH	4	-0.348666	0.000158296	0.00277236
P12074	COX6A1	1	-0.0458301	0.667068	1
P12104	FABP2	1	-0.804539	4.98995e-05	0.00099573
P12107	COL11A1	45	-0.248886	2.97285e-20	3.15287e-18
P12109	COL6A1	2	0.157386	0.106932	0.43279
P12110	COL6A2	1	0.290801	0.0205948	0.15102
P12235	SLC25A4	5	-0.037265	0.848758	1
P12236	SLC25A6	2	-0.209365	0.0407599	0.231792
P12259	F5	13	-0.166543	0.00166312	0.021647
P12268	IMPDH2	26	-0.156888	1.13923e-05	0.000259935
P12270	TPR	74	-0.0096722	1	1
P12277	CKB	19	0.18795	5.13933e-06	0.000130813
P12429	ANXA3	1	1.32054	0.000446519	0.00712316
P12694	BCKDHA	5	0.0411186	0.866758	1
P12814	ACTN1	32	0.470416	3.28867e-34	9.41711e-32
P12829	MYL4	1	1.25461	0.000121314	0.00219168
P12931	SRC	1	0.262306	0.0930741	0.394549
P12955	PEPD	12	-0.017934	0.999648	1
P12956	XRCC6	41	-0.0837582	0.475713	0.954295
P13010	XRCC5	49	-0.0764829	0.538978	1
P13073	COX4I1	7	-0.196347	0.000834245	0.0122506
P13284	IFI30	1	0.270267	0.03911	0.224882
P13473	LAMP2	5	0.10831	0.287999	0.758184
P13489	RNH1	25	0.0188942	0.999981	1
P13637	ATP1A3	1	-0.486869	0.0014958	0.0199684
P13639	EEF2	69	-0.115548	0.000547761	0.00855706
P13667	PDIA4	51	-0.101227	0.00797466	0.0748077
P13674	P4HA1	25	-0.136684	0.000260777	0.00435413
P13693	TPT1	8	-0.0577318	0.691047	1
P13716	ALAD	3	0.0360367	0.846492	1
P13797	PLS3	22	0.134755	0.0429648	0.240752
P13798	APEH	13	-0.0917292	0.376299	0.858671
P13804	ETFA	16	-0.0551516	0.815535	1
P13807	GYS1	6	-0.076837	0.419955	0.904506
P13861	PRKAR2A	15	-0.0121856	0.999969	1
P13929	ENO3	1	0.0880175	0.425006	0.909016
P13984	GTF2F2	9	-0.0857523	0.462419	0.942861
P13987	CD59	4	0.650182	1.36878e-07	4.50519e-06
P13995	MTHFD2	11	-0.171352	0.040178	0.229345
P14174	MIF	4	0.0702025	0.527571	0.997192
P14210	HGF	12	-0.0458182	0.966486	1
P14314	PRKCSH	21	-0.0317475	0.99318	1
P14324	FDPS	8	0.00936981	0.999852	1
P14373	TRIM27	1	-0.0245077	0.811805	1
P14406	COX7A2	2	-0.0476328	0.577513	1
P14415	ATP1B2	1	0.133813	0.496989	0.972592
P14550	AKR1A1	17	-0.00554997	1	1
P14618	PKM	43	0.139615	4.45037e-06	0.000115327
P14621	ACYP2	1	-0.0745621	0.44267	0.925582
P14625	HSP90B1	57	-0.0555407	0.972657	1
P14635	CCNB1	3	-0.24473	0.0147256	0.119622
P14649	MYL6B	4	0.180385	0.0243043	0.169538
P14678	SNRPB	7	0.0283818	0.956002	1
P14735	IDE	16	-0.0794133	0.344588	0.825397
P14854	COX6B1	6	-0.0755432	0.451962	0.931914
P14859	POU2F1	5	-0.103186	0.182733	0.595963
P14866	HNRNPL	19	-0.0911773	0.436512	0.919772
P14868	DARS	37	-0.00619455	1	1
P14923	JUP	14	0.105581	0.207286	0.633809
P14927	UQCRB	9	-0.124055	0.0336459	0.206086
P15121	AKR1B1	14	0.116656	0.0388894	0.223921
P15151	PVR	2	-0.00345693	0.977915	1
P15170	GSPT1	13	-0.0700324	0.757632	1
P15289	ARSA	6	0.21598	0.00443014	0.0475037
P15291	B4GALT1	3	0.0956451	0.332099	0.809474
P15311	EZR	22	0.585021	4.1774e-29	8.24965e-27
P15328	FOLR1	1	1.15185	0.000150738	0.00266443
P15374	UCHL3	6	0.0914218	0.244184	0.688292
P15529	CD46	3	-0.0586833	0.602209	1
P15531	NME1	8	-0.149984	0.0314364	0.197529
P15586	GNS	12	0.0220047	0.996409	1
P15848	ARSB	4	0.00409064	0.99935	1
P15880	RPS2	23	-0.115616	0.00790332	0.074494
P15882	CHN1	3	-0.164059	0.0386713	0.223482
P15924	DSP	6	1.14059	4.83059e-15	3.14373e-13
P15927	RPA2	6	-0.077892	0.443499	0.92631
P15954	COX7C	2	-0.185615	0.131757	0.4903
P16035	TIMP2	1	0.372661	0.00502997	0.0525668
P16070	CD44	2	2.20153	1.26954e-10	5.72495e-09
P16083	NQO2	6	-0.187858	0.0034642	0.0392861
P16152	CBR1	20	-0.276358	1.46158e-10	6.53943e-09
P16157	ANK1	1	0.470579	0.0010538	0.0149755
P16189	HLA-A	2	0.0110597	0.999019	1
P16219	ACADS	2	0.13246	0.183338	0.596579
P16220	CREB1	4	-0.00325213	0.998502	1
P16233	PNLIP	1	0.0826244	0.409792	0.896364
P16278	GLB1	9	0.152027	0.06982	0.331284
P16298	PPP3CB	2	0.0541557	0.648654	1
P16333	NCK1	11	0.0364645	0.966359	1
P16383	GCFC2	3	-0.0518763	0.648743	1
P16401	HIST1H1B	8	-0.11314	0.150906	0.529252
P16403	HIST1H1C	8	-0.210302	0.000408589	0.0066237
P16435	POR	21	0.0521482	0.949657	1
P16455	MGMT	6	-0.0165294	0.99155	1
P16615	ATP2A2	35	-0.0444078	0.975848	1
P16930	FAH	8	-0.1423	0.0621547	0.305021
P16949	STMN1	4	-0.0968732	0.622882	1
P16989	YBX3	5	-0.120991	0.186143	0.599765
P17050	NAGA	11	0.00239171	1	1
P17096	HMGA1	2	0.283473	0.00890372	0.0810678
P17152	TMEM11	1	-0.159921	0.145169	0.518088
P17174	GOT1	18	-0.196796	9.87447e-06	0.000228849
P17275	JUNB	1	0.384887	0.00994619	0.0881682
P17301	ITGA2	2	0.924703	3.61639e-07	1.10754e-05
P17302	GJA1	9	-0.0787659	0.413191	0.897022
P17480	UBTF	27	-0.049567	0.936767	1
P17516	AKR1C4	3	0.133757	0.312894	0.787669
P17568	NDUFB7	2	-0.0542664	0.624407	1
P17612	PRKACA	4	-0.0222974	0.941757	1
P17655	CAPN2	23	0.524074	3.48775e-31	8.32263e-29
P17706	PTPN2	1	0.117204	0.354038	0.834393
P17812	CTPS1	13	-0.0182931	0.998864	1
P17844	DDX5	33	-0.148342	7.379e-05	0.00143253
P17858	PFKL	14	0.0981126	0.126723	0.479169
P17900	GM2A	10	-0.10427	0.268944	0.728592
P17980	PSMC3	27	-0.0333948	0.995763	1
P17987	TCP1	30	-0.0660747	0.713082	1
P18031	PTPN1	4	0.139615	0.199164	0.622725
P18074	ERCC2	1	0.164438	0.287221	0.757817
P18077	RPL35A	9	-0.0355071	0.927522	1
P18084	ITGB5	6	0.210129	0.00267256	0.0320204
P18085	ARF4	8	-0.0569371	0.745601	1
P18124	RPL7	21	-0.0815635	0.321157	0.795877
P18206	VCL	78	0.229164	1.05024e-26	1.82264e-24
P18583	SON	25	-0.0380957	0.987318	1
P18615	NELFE	12	-0.084976	0.45713	0.937337
P18621	RPL17	13	-0.125172	0.0397486	0.228097
P18627	LAG3	1	0.019912	0.852883	1
P18669	PGAM1	18	-0.0506928	0.943075	1
P18754	RCC1	17	-0.0100357	0.999999	1
P18858	LIG1	13	-0.195983	1.963e-05	0.000430731
P18859	ATP5J	5	-0.208026	0.00312025	0.0361582
P18887	XRCC1	11	-0.0655703	0.609849	1
P19174	PLCG1	4	0.0262382	0.935139	1
P19256	CD58	2	-0.0331882	0.797433	1
P19338	NCL	33	-0.133629	0.00175212	0.0224987
P19367	HK1	30	-0.0425917	0.995024	1
P19387	POLR2C	5	-0.0130514	0.991116	1
P19388	POLR2E	6	-0.0728139	0.448346	0.927295
P19404	NDUFV2	12	-0.11282	0.147195	0.522264
P19447	ERCC3	1	0.461206	0.00843178	0.0781333
P19474	TRIM21	4	0.91996	3.58118e-11	1.66743e-09
P19525	EIF2AK2	21	0.626672	3.49608e-30	7.41558e-28
P19532	TFE3	1	-0.184692	0.109954	0.438546
P19544	WT1	3	-0.150283	0.236107	0.67689
P19623	SRM	12	-0.100234	0.412816	0.897008
P19634	SLC9A1	1	0.105453	0.355822	0.836189
P19784	CSNK2A2	8	0.0911868	0.54231	1
P19823	ITIH2	8	0.231997	0.001302	0.0177797
P19827	ITIH1	1	0.235907	0.06795	0.325648
P19838	NFKB1	9	0.169092	0.00219168	0.0274656
P20020	ATP2B1	4	-0.0421655	0.819485	1
P20042	EIF2S2	27	-0.103947	0.51291	0.985385
P20073	ANXA7	13	0.0174159	0.999634	1
P20290	BTF3	12	-0.0725361	0.527719	0.997192
P20337	RAB3B	3	0.0869808	0.406213	0.894074
P20338	RAB4A	2	0.0266311	0.837403	1
P20339	RAB5A	3	-0.0404488	0.763596	1
P20340	RAB6A	3	-0.123402	0.287705	0.758184
P20585	MSH3	6	-0.111015	0.160142	0.550169
P20618	PSMB1	14	-0.00189344	1	1
P20645	M6PR	4	-0.0825942	0.433815	0.916099
P20674	COX5A	10	-0.160826	0.00443766	0.0475037
P20700	LMNB1	46	-0.00397169	1	1
P20742	PZP	1	0.393384	0.0350383	0.21012
P20810	CAST	11	0.158419	0.073729	0.3436
P20839	IMPDH1	1	-0.0548437	0.66056	1
P20933	AGA	3	0.117661	0.291349	0.760509
P20936	RASA1	2	-0.20933	0.0901664	0.386225
P20962	PTMS	1	-0.308563	0.0374803	0.219855
P21127	CDK11B	10	-0.0520005	0.785062	1
P21266	GSTM3	14	0.0119904	0.999975	1
P21281	ATP6V1B2	19	-0.0416588	0.979002	1
P21283	ATP6V1C1	13	-0.172332	0.000279313	0.00463659
P21291	CSRP1	10	0.595281	1.5461e-13	9.32055e-12
P21333	FLNA	140	0.309551	1.31993e-82	1.25988e-79
P21359	NF1	1	-0.0250437	0.806662	1
P21399	ACO1	20	-0.340475	9.44691e-17	7.31114e-15
P21580	TNFAIP3	1	0.20391	0.232701	0.67409
P21589	NT5E	2	2.47112	3.63591e-08	1.30961e-06
P21796	VDAC1	20	-0.0666393	0.816528	1
P21817	RYR1	1	0.00121938	0.994167	1
P21912	SDHB	11	-0.0735311	0.639171	1
P21926	CD9	4	0.402092	5.08748e-06	0.000130071
P21953	BCKDHB	1	-0.0939162	0.371314	0.85368
P21964	COMT	14	0.094136	0.33575	0.813728
P21980	TGM2	12	3.09314	1.4966e-34	4.76169e-32
P22033	MUT	6	0.0325516	0.975106	1
P22059	OSBP	17	-0.0252679	0.998177	1
P22061	PCMT1	10	-0.0890259	0.369644	0.851206
P22087	FBL	13	-0.0247741	0.997905	1
P22102	GART	43	-0.0718833	0.649475	1
P22234	PAICS	24	-0.101095	0.146813	0.521264
P22307	SCP2	22	-0.0526099	0.795074	1
P22314	UBA1	50	-0.00763083	1	1
P22352	GPX3	1	-0.15304	0.202973	0.626646
P22392	NME2	8	-0.108465	0.194676	0.616479
P22570	FDXR	28	-0.0372023	0.992985	1
P22626	HNRNPA2B1	21	-0.106253	0.328397	0.806834
P22670	RFX1	1	0.6988	7.97173e-05	0.00152689
P22681	CBL	8	0.00119096	1	1
P22695	UQCRC2	22	-0.070202	0.452675	0.931914
P22830	FECH	12	-0.0402963	0.975187	1
P22891	PROZ	1	0.00587314	0.967544	1
P23025	XPA	1	-0.080081	0.457595	0.937955
P23142	FBLN1	3	0.139476	0.136491	0.501722
P23193	TCEA1	18	-0.163774	0.000201885	0.00341061
P23229	ITGA6	23	-0.159698	0.000120383	0.00218175
P23246	SFPQ	28	-0.0426958	0.987541	1
P23258	TUBG1	10	-0.0530587	0.777789	1
P23284	PPIB	20	-0.111566	0.0453443	0.249939
P23368	ME2	25	-0.0965993	0.0475968	0.256191
P23378	GLDC	15	-0.0429538	0.901957	1
P23381	WARS	16	0.705261	3.92474e-26	6.422e-24
P23396	RPS3	24	-0.0690651	0.638958	1
P23434	GCSH	2	-0.190736	0.0404259	0.230138
P23443	RPS6KB1	5	-0.0198716	0.977251	1
P23458	JAK1	3	0.221646	0.0191586	0.143198
P23508	MCC	1	0.233557	0.0375961	0.220156
P23511	NFYA	1	-0.0876176	0.411235	0.896859
P23526	AHCY	25	-0.143187	0.000693473	0.0104789
P23528	CFL1	15	-0.136811	0.0254427	0.174798
P23588	EIF4B	11	-0.134797	0.0342305	0.207039
P23634	ATP2B4	15	0.153701	0.00161486	0.0211632
P23743	DGKA	12	0.140299	0.0174656	0.134443
P23786	CPT2	13	0.0118283	0.999922	1
P23919	DTYMK	10	-0.0587993	0.775318	1
P23921	RRM1	21	-0.32152	1.5754e-14	1.01375e-12
P24468	NR2F2	1	-0.392531	0.0138341	0.113507
P24534	EEF1B2	12	-0.132233	0.00923619	0.0836957
P24539	ATP5F1	9	-0.1968	0.00138344	0.0188194
P24666	ACP1	9	-0.0494354	0.825342	1
P24752	ACAT1	22	-0.205467	8.24693e-07	2.38536e-05
P24844	MYL9	6	0.403953	3.55752e-06	9.30316e-05
P24928	POLR2A	27	-0.0346442	0.999552	1
P24941	CDK2	2	0.0477582	0.738898	1
P25054	APC	1	-0.104786	0.434799	0.917499
P25098	GRK2	6	-0.0531984	0.688046	1
P25205	MCM3	33	-0.137696	0.000193621	0.00328067
P25208	NFYB	3	0.131621	0.17519	0.582984
P25325	MPST	9	-0.0672353	0.538674	1
P25398	RPS12	8	-0.0961625	0.212576	0.643722
P25440	BRD2	3	-0.21779	0.0062326	0.0622933
P25445	FAS	2	0.149151	0.164114	0.558977
P25490	YY1	4	-0.116676	0.247299	0.693506
P25685	DNAJB1	14	-0.067386	0.646804	1
P25686	DNAJB2	2	0.372	0.00479532	0.0506009
P25705	ATP5F1A	42	-0.102416	0.024281	0.169538
P25786	PSMA1	14	-0.0727939	0.487057	0.963181
P25787	PSMA2	11	0.0105794	0.999948	1
P25788	PSMA3	9	-0.104578	0.336598	0.814405
P25789	PSMA4	18	-0.0473969	0.98537	1
P26006	ITGA3	6	1.61846	3.18418e-17	2.56842e-15
P26038	MSN	26	0.596203	1.42426e-39	5.43781e-37
P26196	DDX6	18	-0.0899934	0.217931	0.652948
P26358	DNMT1	22	-0.184409	1.13096e-05	0.000259081
P26367	PAX6	4	-0.0786686	0.446561	0.926613
P26368	U2AF2	11	-0.0557648	0.709612	1
P26373	RPL13	16	-0.0117504	0.999985	1
P26440	IVD	7	0.0742651	0.412333	0.896859
P26572	MGAT1	1	0.204696	0.20662	0.633804
P26583	HMGB2	5	-0.110928	0.396729	0.884074
P26599	PTBP1	16	0.063909	0.608167	1
P26639	TARS	30	-0.0261876	0.999919	1
P26640	VARS	31	-0.0555866	0.789292	1
P26641	EEF1G	21	-0.0661993	0.600984	1
P26885	FKBP2	7	-0.0423344	0.885368	1
P27105	STOM	4	0.618391	1.42284e-07	4.65634e-06
P27144	AK4	5	0.196181	0.0193082	0.143982
P27348	YWHAQ	13	-0.0556597	0.92929	1
P27361	MAPK3	4	0.154037	0.0505102	0.267596
P27448	MARK3	3	-0.122383	0.148121	0.523642
P27540	ARNT	1	-0.158638	0.33713	0.815004
P27544	CERS1	3	0.0396642	0.81673	1
P27635	RPL10	16	-0.051062	0.925606	1
P27658	COL8A1	1	-0.0339919	0.749664	1
P27694	RPA1	22	-0.13618	0.000878506	0.0128347
P27695	APEX1	19	-0.0258248	0.998452	1
P27707	DCK	3	-0.208586	0.0332679	0.204426
P27708	CAD	50	-0.0998786	0.0258082	0.176377
P27797	CALR	28	-0.121407	0.00186596	0.0239068
P27816	MAP4	67	0.00714335	1	1
P27824	CANX	31	-0.0309369	0.999972	1
P28065	PSMB9	1	0.470386	0.0014161	0.0191725
P28066	PSMA5	13	-0.0535598	0.84508	1
P28070	PSMB4	7	-0.00193515	0.999998	1
P28072	PSMB6	5	-0.131706	0.0512037	0.270022
P28074	PSMB5	12	-0.0052547	0.999998	1
P28288	ABCD3	10	-0.0258587	0.979291	1
P28331	NDUFS1	31	-0.105921	0.0297969	0.191094
P28340	POLD1	10	-0.0618485	0.654965	1
P28370	SMARCA1	12	-0.00745718	0.999991	1
P28482	MAPK1	12	-0.00304303	1	1
P28676	GCA	5	-0.0610895	0.552733	1
P28715	ERCC5	2	-0.0147442	0.728059	1
P28799	GRN	12	-0.0208276	0.997778	1
P28838	LAP3	28	0.50941	6.36324e-36	2.27764e-33
P28906	CD34	2	-0.0460443	0.729656	1
P29034	S100A2	2	3.40181	5.99668e-11	2.7696e-09
P29083	GTF2E1	2	-0.0176555	0.959979	1
P29084	GTF2E2	5	-0.130581	0.0922775	0.392043
P29144	TPP2	25	-0.0467073	0.959052	1
P29218	IMPA1	10	0.00938605	0.999964	1
P29317	EPHA2	16	0.320506	3.33933e-12	1.66299e-10
P29353	SHC1	6	0.25555	0.000153947	0.00271279
P29372	MPG	4	-0.137006	0.22658	0.664603
P29401	TKT	40	0.332992	5.83894e-30	1.19427e-27
P29558	RBMS1	4	0.194374	0.0134105	0.110666
P29590	PML	12	0.855455	2.86671e-25	4.32043e-23
P29692	EEF1D	18	0.0291652	0.994703	1
P29966	MARCKS	9	-0.268576	3.55346e-05	0.000734681
P29992	GNA11	4	0.13381	0.0912911	0.389586
P30038	ALDH4A1	18	0.0735473	0.392523	0.878802
P30040	ERP29	16	-0.0657298	0.521527	0.992617
P30041	PRDX6	22	0.175923	6.65815e-06	0.00016507
P30043	BLVRB	14	-0.0261861	0.996091	1
P30044	PRDX5	15	-0.105092	0.25641	0.707691
P30046	DDT	4	-0.0499852	0.703129	1
P30048	PRDX3	9	-0.102984	0.108597	0.435793
P30049	ATP5F1D	5	-0.0973837	0.409669	0.896364
P30050	RPL12	14	-0.116384	0.0521749	0.274385
P30084	ECHS1	16	-0.0603709	0.729573	1
P30085	CMPK1	11	-0.0323053	0.978166	1
P30086	PEBP1	13	0.000425212	1	1
P30101	PDIA3	47	-0.0364659	0.99929	1
P30153	PPP2R1A	21	0.00345897	1	1
P30154	PPP2R1B	3	-0.0563749	0.588265	1
P30260	CDC27	8	-0.0798621	0.491976	0.967232
P30405	PPIF	7	-0.158106	0.0170659	0.132614
P30414	NKTR	3	-0.0591444	0.715358	1
P30419	NMT1	10	-0.0441981	0.907045	1
P30460	HLA-B	1	1.26172	2.5136e-05	0.000539153
P30466	HLA-B	1	0.400895	0.0107315	0.0934707
P30483	HLA-B	2	-0.0302306	0.580368	1
P30485	HLA-B	1	1.36361	1.64967e-06	4.60863e-05
P30495	HLA-B	1	-0.0267968	0.814564	1
P30511	HLA-F	1	0.721437	8.04033e-05	0.0015349
P30519	HMOX2	15	0.0412371	0.954021	1
P30520	ADSS	15	-0.250554	1.01725e-07	3.42692e-06
P30533	LRPAP1	9	-0.102793	0.126758	0.479169
P30566	ADSL	20	-0.0735088	0.73408	1
P30622	CLIP1	8	0.112482	0.24404	0.688292
P30626	SRI	13	0.0325361	0.979463	1
P30825	SLC7A1	2	-0.181881	0.199621	0.623013
P30837	ALDH1B1	12	0.0236126	0.994016	1
P30876	POLR2B	17	0.0280276	0.998611	1
P30990	NTS	11	-0.407664	3.31505e-13	1.89853e-11
P31040	SDHA	20	-0.0730435	0.460569	0.941692
P31146	CORO1A	9	-0.0443339	0.853525	1
P31150	GDI1	21	-0.0362567	0.978231	1
P31153	MAT2A	16	-0.0265302	0.996101	1
P31323	PRKAR2B	1	0.119508	0.306458	0.779692
P31350	RRM2	2	-0.675532	0.0015145	0.020171
P31483	TIA1	4	0.0210892	0.949453	1
P31645	SLC6A4	1	-0.10888	0.41624	0.90091
P31689	DNAJA1	17	-0.0578562	0.685736	1
P31749	AKT1	4	-0.0126331	0.980994	1
P31751	AKT2	1	-0.128528	0.239221	0.680248
P31930	UQCRC1	21	-0.0347398	0.991146	1
P31937	HIBADH	12	0.165654	0.00386192	0.0428629
P31939	ATIC	39	-0.0936699	0.153334	0.535461
P31942	HNRNPH3	10	0.0721008	0.53515	1
P31943	HNRNPH1	13	0.0258367	0.995686	1
P31946	YWHAB	5	-0.0890129	0.470113	0.948787
P31947	SFN	3	3.05572	1.21075e-15	8.25472e-14
P31948	STIP1	41	-0.103398	0.123635	0.472263
P32321	DCTD	6	0.026481	0.952057	1
P32322	PYCR1	10	-0.0675157	0.515477	0.986493
P32780	GTF2H1	3	-0.0346969	0.841311	1
P32969	RPL9	14	-0.0881988	0.242658	0.685933
P33121	ACSL1	14	-0.147333	0.00162917	0.021302
P33176	KIF5B	40	-0.0248807	0.999999	1
P33240	CSTF2	6	-0.0715367	0.664344	1
P33316	DUT	8	-0.0445361	0.845189	1
P33527	ABCC1	2	0.0532347	0.809896	1
P33552	CKS2	1	0.0108861	0.911724	1
P33897	ABCD1	1	0.0462818	0.685542	1
P33981	TTK	2	-0.0844184	0.476749	0.954332
P33991	MCM4	33	-0.10799	0.0539979	0.280368
P33992	MCM5	30	-0.0606584	0.758049	1
P33993	MCM7	31	-0.0789382	0.290958	0.760146
P34059	GALNS	6	0.0658613	0.667259	1
P34896	SHMT1	4	-0.074088	0.446735	0.926639
P34897	SHMT2	23	-0.076882	0.315535	0.790148
P34932	HSPA4	63	-0.104973	0.0289717	0.188333
P34949	MPI	10	0.0224265	0.990973	1
P35052	GPC1	1	0.480226	0.0318405	0.199508
P35080	PFN2	7	-0.0782396	0.495188	0.970893
P35219	CA8	2	-0.0566195	0.608184	1
P35221	CTNNA1	32	0.237766	1.90899e-13	1.12709e-11
P35222	CTNNB1	5	0.588818	3.3208e-07	1.02801e-05
P35226	BMI1	1	-0.0477078	0.621281	1
P35232	PHB	23	-0.0915433	0.169429	0.56858
P35237	SERPINB6	15	-0.155857	0.103783	0.424546
P35240	NF2	1	0.239411	0.0342326	0.207039
P35241	RDX	23	0.0157754	0.999998	1
P35244	RPA3	6	-0.0214536	0.974073	1
P35249	RFC4	8	-0.127696	0.12771	0.480327
P35250	RFC2	5	-0.11553	0.112069	0.44355
P35251	RFC1	10	-0.0933865	0.512652	0.985231
P35268	RPL22	3	0.00375737	0.99754	1
P35269	GTF2F1	8	-0.0809918	0.330872	0.80868
P35270	SPR	17	-0.0174933	0.999944	1
P35452	HOXD12	1	0.083281	0.441499	0.924147
P35556	FBN2	84	0.0320717	1	1
P35568	IRS1	13	0.0120967	0.999948	1
P35573	AGL	7	-0.142836	0.0277606	0.184437
P35579	MYH9	137	0.26924	4.50811e-63	2.86866e-60
P35580	MYH10	82	0.0282878	1	1
P35606	COPB2	34	-0.0263836	0.999913	1
P35610	SOAT1	2	-0.0134284	0.949396	1
P35611	ADD1	12	0.036511	0.959276	1
P35612	ADD2	2	0.137341	0.388557	0.876819
P35613	BSG	7	0.16441	0.00526921	0.0546681
P35625	TIMP3	1	0.139483	0.220517	0.656023
P35637	FUS	10	-0.164911	0.0254529	0.174798
P35658	NUP214	20	-0.0985767	0.337654	0.815169
P35659	DEK	16	-0.0668216	0.769774	1
P35670	ATP7B	2	0.0766598	0.437936	0.919772
P35711	SOX5	6	-0.158414	0.114384	0.450536
P35813	PPM1A	6	0.0333518	0.925815	1
P35914	HMGCL	11	0.0731813	0.44629	0.926476
P35998	PSMC2	33	-0.0611795	0.806738	1
P36404	ARL2	5	-0.0132098	0.988757	1
P36405	ARL3	9	-0.194271	0.00120164	0.016744
P36507	MAP2K2	5	-0.0118356	0.991721	1
P36542	ATP5F1C	14	-0.107434	0.223947	0.661446
P36543	ATP6V1E1	9	-0.0632945	0.726027	1
P36551	CPOX	21	-0.247521	4.93708e-10	2.09442e-08
P36578	RPL4	33	-0.115081	0.0353732	0.211243
P36639	NUDT1	3	-0.0756052	0.462458	0.942861
P36776	LONP1	36	-0.0382071	0.99722	1
P36871	PGM1	21	-0.0158213	0.999982	1
P36873	PPP1CC	2	0.0506243	0.663301	1
P36894	BMPR1A	1	0.137646	0.1812	0.592981
P36915	GNL1	10	0.0353001	0.943106	1
P36954	POLR2I	2	-0.0461501	0.663459	1
P36955	SERPINF1	2	0.150486	0.174229	0.58056
P36957	DLST	16	-0.00184012	1	1
P36969	GPX4	11	-0.0197326	0.996002	1
P37108	SRP14	11	-0.135895	0.0115194	0.0986122
P37198	NUP62	10	-0.0692625	0.534629	1
P37235	HPCAL1	4	0.0336758	0.864988	1
P37802	TAGLN2	15	0.786596	5.44584e-28	1.03961e-25
P37837	TALDO1	17	0.00920229	1	1
P37840	SNCA	3	-0.798891	7.75442e-08	2.67527e-06
P38117	ETFB	19	-0.0759759	0.329976	0.8079
P38159	RBMX	7	-0.0979263	0.229958	0.669272
P38432	COIL	6	-0.0199015	0.976896	1
P38435	GGCX	3	0.0995574	0.241659	0.68547
P38571	LIPA	3	0.203152	0.0123007	0.103732
P38606	ATP6V1A	26	-0.0423248	0.961085	1
P38646	HSPA9	51	-0.158467	6.12956e-07	1.83791e-05
P38919	EIF4A3	23	-0.0452941	0.922772	1
P39019	RPS19	13	-0.0993302	0.127735	0.480327
P39023	RPL3	28	-0.157756	0.00102426	0.0146648
P39060	COL18A1	6	0.497544	1.45138e-08	5.46845e-07
P39210	MPV17	1	0.0196108	0.877314	1
P39656	DDOST	14	0.00388477	1	1
P39687	ANP32A	7	-0.0527241	0.822434	1
P39748	FEN1	18	-0.167615	8.67411e-05	0.00165039
P39880	CUX1	3	0.0438629	0.781253	1
P40121	CAPG	1	2.76591	3.67771e-07	1.12033e-05
P40123	CAP2	15	0.0915541	0.119509	0.463706
P40222	TXLNA	15	-0.0488176	0.925434	1
P40227	CCT6A	32	-0.0709565	0.48185	0.95685
P40306	PSMB10	1	0.0841637	0.450288	0.929632
P40337	VHL	1	0.0794489	0.44623	0.926476
P40429	RPL13A	12	-0.125298	0.021591	0.155929
P40616	ARL1	4	-0.106157	0.194209	0.616036
P40617	ARL4A	1	-0.367171	0.0051892	0.0541322
P40692	MLH1	7	-0.129742	0.0892217	0.384479
P40763	STAT3	35	0.203603	4.54019e-10	1.94042e-08
P40818	USP8	3	-0.0559858	0.682298	1
P40855	PEX19	4	-0.100555	0.353817	0.834393
P40925	MDH1	22	-0.178706	3.69338e-05	0.000760863
P40926	MDH2	24	-0.250436	5.14613e-13	2.86135e-11
P40937	RFC5	12	-0.0211014	0.997056	1
P40938	RFC3	9	-0.086642	0.255788	0.706656
P40939	HADHA	49	-0.0753271	0.608907	1
P41091	EIF2S3	20	-0.0114636	1	1
P41208	CETN2	3	-0.0797417	0.615127	1
P41212	ETV6	1	0.189939	0.0955519	0.4008
P41214	EIF2D	14	-0.00894527	0.999999	1
P41223	BUD31	6	-0.135002	0.0748172	0.346385
P41227	NAA10	11	-0.137963	0.0461234	0.251244
P41236	PPP1R2	2	0.0103355	0.931445	1
P41240	CSK	12	0.00834924	0.999986	1
P41247	PNPLA4	2	0.0558215	0.630336	1
P41250	GARS	30	-0.0086395	1	1
P41252	IARS	42	-0.0975322	0.0247161	0.171437
P41567	EIF1	1	-0.16863	0.210319	0.639328
P41743	PRKCI	9	-0.0517357	0.843437	1
P42025	ACTR1B	1	0.425434	0.00561564	0.0573275
P42126	ECI1	5	-0.0268264	0.941414	1
P42166	TMPO	12	-0.0205833	0.999429	1
P42167	TMPO	11	-0.0372828	0.96888	1
P42224	STAT1	39	0.886061	2.22303e-72	1.81876e-69
P42285	MTREX	27	-0.103401	0.05088	0.268562
P42345	MTOR	11	0.00962939	0.999928	1
P42356	PI4KA	1	-0.209477	0.0812012	0.362725
P42566	EPS15	11	0.21174	1.9334e-05	0.000425869
P42574	CASP3	3	0.0755024	0.437464	0.919772
P42677	RPS27	1	0.0363242	0.73986	1
P42684	ABL2	1	0.150209	0.176457	0.585306
P42694	HELZ	1	-0.0599251	0.5479	1
P42695	NCAPD3	2	0.0346978	0.812114	1
P42696	RBM34	7	-0.13249	0.13946	0.508394
P42704	LRPPRC	95	-0.179901	9.01691e-21	9.93074e-19
P42765	ACAA2	16	0.199481	1.80278e-06	4.9877e-05
P42766	RPL35	7	-0.137734	0.0352984	0.211088
P42771	CDKN2A	7	0.165635	0.0383657	0.2226
P42785	PRCP	11	-0.0603821	0.674343	1
P42858	HTT	5	0.0110096	0.994122	1
P42892	ECE1	2	0.507327	0.000114721	0.00209238
P43004	SLC1A2	1	0.134705	0.264445	0.722899
P43034	PAFAH1B1	19	0.00931603	1	1
P43155	CRAT	8	0.0184892	0.991676	1
P43235	CTSK	2	0.0627543	0.597088	1
P43243	MATR3	38	-0.0260919	0.999963	1
P43246	MSH2	24	-0.0347362	0.998936	1
P43250	GRK6	1	-0.133909	0.418451	0.903987
P43304	GPD2	24	0.0544708	0.961885	1
P43307	SSR1	4	0.00230637	0.999726	1
P43354	NR4A2	3	-0.136287	0.0935445	0.395372
P43358	MAGEA4	11	0.00513496	0.999998	1
P43362	MAGEA9	2	0.0950021	0.432934	0.915136
P43487	RANBP1	8	-0.0996079	0.315244	0.790148
P43490	NAMPT	16	0.221179	1.17797e-07	3.94057e-06
P43686	PSMC4	27	-0.0465192	0.924234	1
P43897	TSFM	11	-0.0755115	0.465979	0.945329
P45877	PPIC	4	-0.160824	0.0327945	0.20313
P45880	VDAC2	14	-0.0386749	0.96242	1
P45954	ACADSB	7	-0.145999	0.0254811	0.174798
P45973	CBX5	9	-0.143245	0.0294196	0.189736
P45974	USP5	27	0.0265088	0.999494	1
P45983	MAPK8	1	-0.0219774	0.820969	1
P45984	MAPK9	1	-0.125685	0.246626	0.692706
P45985	MAP2K4	6	-0.0421384	0.799352	1
P46013	MKI67	35	-0.254662	1.18348e-07	3.94057e-06
P46019	PHKA2	3	0.0823847	0.357445	0.837254
P46020	PHKA1	1	0.0915819	0.389254	0.876819
P46060	RANGAP1	29	-0.0824134	0.283387	0.752857
P46063	RECQL	21	-0.0525507	0.831999	1
P46087	NOP2	19	-0.113546	0.0104526	0.0916722
P46100	ATRX	8	-0.034942	0.948122	1
P46108	CRK	13	0.0668674	0.483182	0.958497
P46109	CRKL	14	-0.00292492	1	1
P46199	MTIF2	12	-0.025452	0.990804	1
P46379	BAG6	11	0.0839887	0.520894	0.991742
P46459	NSF	38	0.00624508	1	1
P46734	MAP2K3	5	0.0850579	0.504639	0.978357
P46736	BRCC3	2	0.175203	0.36597	0.847516
P46776	RPL27A	9	-0.140869	0.0618109	0.303855
P46777	RPL5	22	-0.0677917	0.702889	1
P46778	RPL21	11	-0.0219195	0.996529	1
P46779	RPL28	8	-0.119067	0.0886786	0.383102
P46781	RPS9	17	-0.0861094	0.20296	0.626646
P46782	RPS5	11	-0.0607457	0.658853	1
P46783	RPS10	11	-0.128179	0.0328795	0.20313
P46821	MAP1B	67	0.60454	1.36963e-87	1.96097e-84
P46926	GNPDA1	5	0.148372	0.0828991	0.366613
P46937	YAP1	13	-0.0560019	0.739053	1
P46939	UTRN	53	0.0234578	1	1
P46940	IQGAP1	65	0.295781	9.8352e-35	3.31331e-32
P46976	GYG1	7	-0.034704	0.901425	1
P46977	STT3A	4	0.00456856	0.99889	1
P47224	RABIF	4	-0.0104205	0.993749	1
P47755	CAPZA2	7	0.00855879	0.999693	1
P47756	CAPZB	15	0.0204065	0.998778	1
P47813	EIF1AX	9	-0.122995	0.0500941	0.266711
P47897	QARS	29	-0.0223959	0.999965	1
P47914	RPL29	8	-0.13695	0.0280349	0.185829
P47928	ID4	1	0.00942857	0.923563	1
P47985	UQCRFS1	10	-0.113663	0.0777639	0.354323
P48047	ATP5O	13	-0.133845	0.00945933	0.0849509
P48059	LIMS1	16	0.138241	0.0368539	0.218039
P48147	PREP	15	-0.047752	0.886583	1
P48200	IREB2	6	0.00813564	0.998964	1
P48201	ATP5MC3	1	-0.201544	0.0740281	0.344494
P48426	PIP4K2A	2	0.292746	0.122557	0.470118
P48444	ARCN1	22	-0.095617	0.199901	0.623209
P48449	LSS	3	-0.0278377	0.911734	1
P48506	GCLC	4	0.0665829	0.526297	0.996371
P48507	GCLM	8	0.188174	0.00143856	0.0194308
P48509	CD151	2	0.247236	0.00961627	0.0857825
P48556	PSMD8	13	-0.0200723	0.997998	1
P48634	PRRC2A	14	-0.100106	0.120258	0.465825
P48637	GSS	18	0.0285127	0.997759	1
P48643	CCT5	38	-0.10408	0.0245426	0.170784
P48645	NMU	2	-0.067566	0.575332	1
P48681	NES	31	0.378895	7.45879e-21	8.5433e-19
P48723	HSPA13	10	-0.0626028	0.61211	1
P48729	CSNK1A1	8	-0.0689569	0.50602	0.978715
P48730	CSNK1D	2	0.120534	0.355151	0.836189
P48735	IDH2	25	-0.126983	0.00147717	0.0197657
P48739	PITPNB	17	-0.0273565	0.998343	1
P48960	CD97	3	-0.0502709	0.706834	1
P49005	POLD2	4	-0.0577853	0.644974	1
P49006	MARCKSL1	2	-0.0274862	0.96317	1
P49023	PXN	7	0.308316	6.65575e-06	0.00016507
P49069	CAMLG	1	-0.0833857	0.48456	0.959902
P49116	NR2C2	1	0.215791	0.0890387	0.383979
P49137	MAPKAPK2	3	-0.0177126	0.943533	1
P49189	ALDH9A1	21	-0.0288886	0.999881	1
P49207	RPL34	7	-0.0717791	0.425065	0.909016
P49247	RPIA	7	-0.0239546	0.979958	1
P49257	LMAN1	16	-0.119363	0.0299738	0.19176
P49281	SLC11A2	1	0.00787574	0.964259	1
P49321	NASP	33	-0.177941	2.24913e-06	6.1337e-05
P49327	FASN	86	-0.112325	1.36666e-05	0.000305737
P49354	FNTA	1	-0.066186	0.508475	0.982468
P49366	DHPS	2	-0.0505677	0.734414	1
P49368	CCT3	39	-0.0668583	0.715724	1
P49406	MRPL19	6	0.0093303	0.999154	1
P49407	ARRB1	6	0.351926	1.16357e-06	3.33189e-05
P49411	TUFM	32	-0.0975166	0.0591551	0.29554
P49419	ALDH7A1	22	-0.0499835	0.8935	1
P49427	CDC34	3	-0.198919	0.0151141	0.121742
P49441	INPP1	8	-0.207438	0.000423687	0.00681589
P49448	GLUD2	1	0.0242345	0.820727	1
P49454	CENPF	1	0.135566	0.556275	1
P49458	SRP9	2	-0.225939	0.0224757	0.160496
P49459	UBE2A	6	-0.182546	0.00394236	0.0433357
P49585	PCYT1A	10	-0.00609367	0.99996	1
P49588	AARS	44	-0.0207667	1	1
P49589	CARS	23	0.0267697	0.999468	1
P49590	HARS2	7	-0.0606677	0.562658	1
P49591	SARS	18	-0.037572	0.987934	1
P49593	PPM1F	7	0.171729	0.00520625	0.0542113
P49642	PRIM1	2	-0.305609	0.0143927	0.117417
P49643	PRIM2	3	-0.162204	0.101982	0.41985
P49674	CSNK1E	1	0.005428	0.966518	1
P49711	CTCF	6	-0.165605	0.0437185	0.243528
P49720	PSMB3	5	0.0409712	0.872771	1
P49721	PSMB2	6	0.0236125	0.956501	1
P49736	MCM2	29	-0.126748	0.00240571	0.0296938
P49746	THBS3	3	-0.185299	0.177159	0.585453
P49747	COMP	2	0.128586	0.24807	0.693863
P49748	ACADVL	33	0.0214253	0.999997	1
P49750	YLPM1	16	0.0102548	0.999998	1
P49753	ACOT2	11	-0.0366657	0.92767	1
P49754	VPS41	3	0.0619694	0.578649	1
P49755	TMED10	11	-0.0644558	0.634599	1
P49756	RBM25	15	-0.0533038	0.74484	1
P49757	NUMB	2	-0.0125061	0.97371	1
P49761	CLK3	1	-0.147319	0.239439	0.680531
P49770	EIF2B2	9	-0.0109729	0.99983	1
P49773	HINT1	6	0.118381	0.155401	0.53968
P49790	NUP153	26	-0.0368579	0.99641	1
P49792	RANBP2	80	-0.105627	0.0074541	0.0714753
P49810	PSEN2	1	-0.165981	0.178452	0.588031
P49815	TSC2	1	0.0323292	0.749892	1
P49821	NDUFV1	16	-0.0918825	0.121626	0.468565
P49840	GSK3A	5	-0.0590078	0.659502	1
P49841	GSK3B	7	-0.0668634	0.488827	0.964351
P49848	TAF6	3	0.0303832	0.84474	1
P49902	NT5C2	6	0.376657	2.18383e-07	7.02628e-06
P49903	SEPHS1	9	-0.00589693	0.999976	1
P49914	MTHFS	3	0.0190328	0.943961	1
P49915	GMPS	35	-0.102203	0.017268	0.133576
P49916	LIG3	15	0.0170987	0.999967	1
P49917	LIG4	3	0.023611	0.909804	1
P49959	MRE11	17	-0.0644838	0.64175	1
P49961	ENTPD1	1	-0.044445	0.738673	1
P50148	GNAQ	2	0.0723604	0.746567	1
P50151	GNG10	2	-0.0612625	0.542558	1
P50213	IDH3A	15	-0.185504	7.36115e-06	0.000177879
P50219	MNX1	1	-0.48804	0.0836316	0.368253
P50238	CRIP1	4	-0.100009	0.336164	0.81437
P50281	MMP14	8	0.110264	0.128025	0.481104
P50336	PPOX	1	0.206537	0.0903075	0.386541
P50395	GDI2	27	-0.0523667	0.88125	1
P50402	EMD	14	0.0778466	0.456538	0.937272
P50416	CPT1A	16	0.0135072	0.999986	1
P50440	GATM	20	0.0213333	0.999993	1
P50454	SERPINH1	23	-0.0137719	0.999999	1
P50502	ST13	17	-0.112157	0.056482	0.287667
P50542	PEX5	4	-0.0147031	0.976644	1
P50548	ERF	3	0.0423662	0.733087	1
P50552	VASP	13	0.0684222	0.580284	1
P50570	DNM2	30	0.08746	0.19686	0.620142
P50579	METAP2	12	-0.0184698	0.998625	1
P50583	NUDT2	6	-0.0140627	0.997075	1
P50613	CDK7	1	0.238719	0.199893	0.623209
P50750	CDK9	4	0.040406	0.794205	1
P50851	LRBA	17	-0.0887298	0.125447	0.477048
P50895	BCAM	2	0.401627	0.000358649	0.00588533
P50897	PPT1	9	-0.015809	0.997212	1
P50914	RPL14	11	-0.0636008	0.615647	1
P50990	CCT8	38	-0.114815	0.0109519	0.0948886
P50991	CCT4	34	-0.0843142	0.242628	0.685933
P50995	ANXA11	18	0.139867	0.00402918	0.0439818
P51003	PAPOLA	6	-0.159409	0.0167175	0.130437
P51114	FXR1	21	-0.0590736	0.81484	1
P51116	FXR2	11	0.01247	0.999768	1
P51148	RAB5C	4	0.0519646	0.682804	1
P51149	RAB7A	18	-0.0830217	0.298731	0.769425
P51151	RAB9A	5	-0.137012	0.0460807	0.251244
P51153	RAB13	6	0.0109725	0.998539	1
P51157	RAB28	1	-0.303807	0.0235382	0.166219
P51159	RAB27A	1	-0.266364	0.0465595	0.252264
P51398	DAP3	7	-0.171492	0.00370928	0.0414094
P51452	DUSP3	8	0.0146329	0.998483	1
P51512	MMP16	1	-0.0969314	0.332915	0.810976
P51532	SMARCA4	8	3.03572	7.63155e-16	5.39579e-14
P51553	IDH3G	6	-0.0680504	0.568137	1
P51570	GALK1	11	-0.0735693	0.388062	0.876354
P51571	SSR4	5	-0.0995326	0.260498	0.715153
P51572	BCAP31	13	-0.0774499	0.379883	0.864701
P51580	TPMT	5	-0.00375455	0.999739	1
P51606	RENBP	1	-0.135383	0.219158	0.654049
P51608	MECP2	8	0.032009	0.981756	1
P51610	HCFC1	27	-0.0945005	0.161288	0.553442
P51617	IRAK1	5	0.15005	0.325162	0.802674
P51648	ALDH3A2	5	0.0165745	0.981808	1
P51649	ALDH5A1	7	0.00803331	0.999845	1
P51659	HSD17B4	31	-0.150876	2.86707e-05	0.00060077
P51665	PSMD7	13	-0.0983051	0.28903	0.758569
P51668	UBE2D1	2	-0.0227078	0.935349	1
P51674	GPM6A	1	-0.199674	0.0740478	0.344494
P51687	SUOX	1	-0.0167553	0.86162	1
P51688	SGSH	5	0.16349	0.0700653	0.331898
P51692	STAT5B	5	-0.00909926	0.997522	1
P51784	USP11	10	0.0418464	0.90377	1
P51790	CLCN3	1	-0.144066	0.161449	0.553619
P51798	CLCN7	2	0.00205114	0.998198	1
P51809	VAMP7	4	-0.101535	0.366448	0.847597
P51812	RPS6KA3	7	0.076543	0.468068	0.947887
P51858	HDGF	11	-0.0211531	0.999599	1
P51884	LUM	3	0.117984	0.167683	0.56556
P51911	CNN1	2	0.261651	0.00825973	0.0769162
P51946	CCNH	1	-0.0718382	0.463258	0.943484
P51948	MNAT1	4	-0.0445959	0.811202	1
P51956	NEK3	2	0.00986788	0.995447	1
P51957	NEK4	1	-0.0467672	0.671349	1
P51970	NDUFA8	6	-0.097552	0.177116	0.585453
P51991	HNRNPA3	15	0.027788	0.994532	1
P52209	PGD	26	0.0546947	0.938577	1
P52272	HNRNPM	39	-0.0218322	0.999999	1
P52292	KPNA2	22	-0.101927	0.511062	0.983815
P52294	KPNA1	10	-0.0933081	0.225801	0.66384
P52298	NCBP2	1	0.077691	0.614212	1
P52306	RAP1GDS1	11	-0.0781309	0.545291	1
P52434	POLR2H	1	-0.115634	0.305192	0.778199
P52565	ARHGDIA	11	0.00271652	1	1
P52594	AGFG1	3	-0.0373054	0.794538	1
P52597	HNRNPF	13	0.075472	0.631866	1
P52630	STAT2	2	0.404537	0.00118306	0.0165657
P52655	GTF2A1	2	-0.167037	0.137871	0.50397
P52657	GTF2A2	2	-0.0722225	0.545775	1
P52701	MSH6	30	-0.0737325	0.689319	1
P52732	KIF11	9	-0.0579142	0.654453	1
P52735	VAV2	3	0.118245	0.140498	0.509831
P52756	RBM5	4	-0.144517	0.146402	0.520688
P52758	RIDA	4	-0.096667	0.252315	0.700735
P52788	SMS	10	0.333201	1.52071e-09	6.22078e-08
P52789	HK2	5	0.137492	0.0836559	0.368253
P52815	MRPL12	7	-0.260843	0.000543299	0.00852458
P52848	NDST1	1	0.0934716	0.339681	0.818407
P52888	THOP1	12	-0.0822703	0.444446	0.926476
P52907	CAPZA1	10	0.0666118	0.709109	1
P52926	HMGA2	2	0.0948332	0.370177	0.852092
P52943	CRIP2	4	-0.047388	0.766734	1
P52948	NUP98	20	-0.0793428	0.266777	0.726242
P53004	BLVRA	14	0.036709	0.97664	1
P53007	SLC25A1	9	0.0109062	0.999603	1
P53041	PPP5C	15	-0.060142	0.688618	1
P53350	PLK1	1	-0.150405	0.253447	0.703242
P53365	ARFIP2	7	-0.110269	0.133207	0.494092
P53367	ARFIP1	10	-0.0454822	0.962104	1
P53384	NUBP1	6	-0.111158	0.149397	0.52652
P53396	ACLY	52	0.035851	0.999959	1
P53582	METAP1	11	-0.112443	0.130594	0.487876
P53597	SUCLG1	8	-0.0789549	0.418827	0.9043
P53602	MVD	5	-0.136531	0.0646083	0.314257
P53611	RABGGTB	2	0.022936	0.883172	1
P53618	COPB1	33	-0.0345561	0.998464	1
P53621	COPA	51	-0.0208669	1	1
P53634	CTSC	5	-0.0424089	0.813341	1
P53677	AP3M2	1	0.0429812	0.678976	1
P53680	AP2S1	4	0.101732	0.24228	0.685933
P53701	HCCS	14	-0.355297	1.80376e-10	8.00492e-09
P53801	PTTG1IP	1	-0.00662564	0.948806	1
P53814	SMTN	1	0.148323	0.376392	0.858671
P53985	SLC16A1	2	0.173859	0.076033	0.349191
P53990	IST1	7	-0.0937009	0.391521	0.878802
P53992	SEC24C	18	0.140323	0.00743753	0.0714753
P53999	SUB1	10	-0.0283839	0.980202	1
P54098	POLG	4	-0.0570381	0.838075	1
P54105	CLNS1A	6	-0.0564281	0.704113	1
P54136	RARS	39	-0.064904	0.52055	0.991416
P54252	ATXN3	2	0.643606	0.00859559	0.0790159
P54278	PMS2	2	-0.0859371	0.43304	0.915136
P54289	CACNA2D1	7	-0.0280719	0.950738	1
P54296	MYOM2	1	-0.0491645	0.630841	1
P54577	YARS	34	-0.0579069	0.955675	1
P54578	USP14	27	-0.049133	0.978745	1
P54619	PRKAG1	4	-0.0520603	0.790335	1
P54652	HSPA2	11	0.379208	3.25582e-10	1.40196e-08
P54709	ATP1B3	10	-0.115936	0.0565444	0.287667
P54725	RAD23A	5	0.0492768	0.701054	1
P54727	RAD23B	9	-0.0460483	0.901939	1
P54756	EPHA5	7	-0.142905	0.0940306	0.396257
P54760	EPHB4	1	-0.0194759	0.847522	1
P54802	NAGLU	4	0.0597881	0.616479	1
P54819	AK2	16	0.0217216	0.998988	1
P54886	ALDH18A1	31	-0.0828214	0.183083	0.596208
P54920	NAPA	18	0.186315	1.46247e-05	0.000325897
P55010	EIF5	15	-0.0861549	0.184436	0.597792
P55011	SLC12A2	11	0.634983	3.57678e-16	2.62619e-14
P55036	PSMD4	13	-0.0889466	0.893269	1
P55039	DRG2	4	-0.185783	0.0152711	0.12249
P55060	CSE1L	21	-0.103091	0.264748	0.723027
P55061	TMBIM6	1	-0.00315235	0.975521	1
P55072	VCP	67	0.0285533	1	1
P55081	MFAP1	4	-0.00638521	0.996106	1
P55083	MFAP4	2	-0.106266	0.350099	0.831065
P55084	HADHB	28	-0.0125631	1	1
P55145	MANF	12	-0.150695	0.00342417	0.0389092
P55196	AFDN	21	0.0735602	0.327498	0.805401
P55199	ELL	2	-0.205695	0.0680992	0.32609
P55209	NAP1L1	8	-0.11298	0.168997	0.568317
P55210	CASP7	9	0.169501	0.00104592	0.0149021
P55211	CASP9	1	-0.0717646	0.526189	0.996371
P55212	CASP6	3	-0.0702121	0.476196	0.954295
P55263	ADK	13	0.0424944	0.891644	1
P55265	ADAR	36	0.175733	2.20232e-09	8.88216e-08
P55268	LAMB2	28	-0.00338185	1	1
P55327	TPD52	12	-0.181605	0.0179621	0.136862
P55735	SEC13	11	0.00964945	0.999984	1
P55769	SNU13	7	-0.0425068	0.813364	1
P55786	NPEPPS	43	0.0415188	0.997016	1
P55789	GFER	2	-0.0610175	0.643778	1
P55795	HNRNPH2	6	0.0980992	0.417056	0.901993
P55809	OXCT1	3	0.00647954	0.993486	1
P55854	SUMO3	1	0.130645	0.277273	0.743108
P55884	EIF3B	24	-0.0324772	0.997185	1
P56134	ATP5J2	3	-0.102194	0.382646	0.868231
P56181	NDUFV3	1	-0.0628367	0.56791	1
P56182	RRP1	6	-0.0375542	0.887612	1
P56192	MARS	26	-0.032621	0.998052	1
P56211	ARPP19	2	-0.417994	0.108463	0.435793
P56270	MAZ	1	0.105632	0.30398	0.777067
P56377	AP1S2	1	-0.0316313	0.748766	1
P56378	MP68	2	-0.213184	0.0203141	0.149153
P56381	ATP5F1E	3	-0.139275	0.157938	0.545215
P56385	ATP5ME	4	-0.0858302	0.316337	0.791809
P56537	EIF6	8	0.061096	0.609463	1
P56545	CTBP2	7	0.0226748	0.980435	1
P56556	NDUFA6	7	-0.122673	0.0611281	0.302315
P56730	PRSS12	7	0.0661015	0.845613	1
P56747	CLDN6	1	-0.102361	0.634825	1
P56945	BCAR1	1	0.256635	0.0349822	0.210084
P56962	STX17	1	0.188026	0.0771037	0.351851
P57076	CFAP298	4	-0.115668	0.200695	0.62362
P57078	RIPK4	1	0.231143	0.0566296	0.287667
P57081	WDR4	1	-0.809589	0.0545438	0.281659
P57088	TMEM33	2	0.0417852	0.692197	1
P57105	SYNJ2BP	4	-0.00884514	0.993363	1
P57678	GEMIN4	4	-0.0843568	0.334272	0.812209
P57721	PCBP3	1	-0.0430833	0.682723	1
P57723	PCBP4	2	0.11271	0.308906	0.783001
P57737	CORO7	11	0.0249627	0.992652	1
P57740	NUP107	10	-0.0214385	0.99341	1
P57772	EEFSEC	3	0.0633683	0.52957	0.998182
P58004	SESN2	1	0.0460131	0.650206	1
P58107	EPPK1	1	0.0265681	0.843283	1
P58335	ANTXR2	4	-0.0484168	0.783383	1
P58546	MTPN	6	-0.0396119	0.872116	1
P58557	YBEY	1	-0.090257	0.44214	0.925151
P59998	ARPC4	6	0.0104702	0.997734	1
P60002	ELOF1	1	-0.177196	0.0921805	0.391921
P60033	CD81	3	0.0460313	0.706479	1
P60174	TPI1	19	-0.10378	0.0545886	0.281659
P60228	EIF3E	15	-0.0253637	0.99715	1
P60468	SEC61B	1	0.0427094	0.659477	1
P60510	PPP4C	2	0.138605	0.178379	0.588031
P60520	GABARAPL2	2	-0.227556	0.0289558	0.188333
P60602	ROMO1	2	-0.151712	0.0900417	0.386225
P60604	UBE2G2	5	-0.0525016	0.659328	1
P60660	MYL6	11	0.206225	1.687e-05	0.000373029
P60709	ACTB	13	0.102595	0.121949	0.469105
P60763	RAC3	1	0.0568891	0.602553	1
P60842	EIF4A1	23	-0.0678712	0.604329	1
P60866	RPS20	8	-0.0570955	0.653614	1
P60891	PRPS1	6	-0.0635317	0.678222	1
P60900	PSMA6	15	-0.0151212	0.999932	1
P60953	CDC42	7	0.00490821	0.999914	1
P60981	DSTN	17	-0.193007	9.40242e-05	0.00175399
P60983	GMFB	6	0.00815129	0.998872	1
P61006	RAB8A	2	-0.06844	0.553129	1
P61009	SPCS3	1	-0.0435297	0.674921	1
P61011	SRP54	24	-0.0409699	0.968088	1
P61018	RAB4B	1	0.117469	0.27791	0.743886
P61019	RAB2A	2	-0.108423	0.307093	0.780961
P61020	RAB5B	2	0.059288	0.59624	1
P61024	CKS1B	1	-0.0379816	0.709029	1
P61026	RAB10	6	-0.0209664	0.982423	1
P61077	UBE2D3	4	-0.0964587	0.223848	0.661446
P61081	UBE2M	9	-0.125669	0.0683303	0.326319
P61086	UBE2K	12	-0.0589119	0.81114	1
P61088	UBE2N	9	-0.0214979	0.992685	1
P61106	RAB14	12	-0.0566838	0.762709	1
P61158	ACTR3	22	-0.0378279	0.989468	1
P61160	ACTR2	18	-0.044491	0.958533	1
P61163	ACTR1A	7	-0.0330628	0.925532	1
P61165	TMEM258	1	0.0316097	0.767662	1
P61201	COPS2	18	-0.0320957	0.994584	1
P61218	POLR2F	3	-0.151079	0.0782314	0.355863
P61221	ABCE1	22	-0.172948	0.000174435	0.00299099
P61224	RAP1B	5	-0.183857	0.00536478	0.0553588
P61225	RAP2B	6	-0.103475	0.182973	0.596208
P61244	MAX	1	-0.668336	0.0197719	0.146669
P61247	RPS3A	30	-0.122309	0.0237971	0.167222
P61254	RPL26	2	-0.24016	0.0418008	0.236554
P61289	PSME3	11	-0.0347892	0.950913	1
P61313	RPL15	8	-0.0559868	0.736749	1
P61353	RPL27	10	-0.110467	0.207747	0.63488
P61371	ISL1	2	-0.0181969	0.958304	1
P61421	ATP6V0D1	8	-0.112281	0.105046	0.427273
P61457	PCBD1	4	0.0624865	0.598274	1
P61513	RPL37A	4	-0.0943132	0.285561	0.755734
P61586	RHOA	3	-0.0933813	0.299243	0.769425
P61587	RND3	4	0.0375548	0.836287	1
P61604	HSPE1	17	-0.179828	4.73719e-06	0.000122207
P61619	SEC61A1	5	-0.165179	0.0539506	0.280368
P61758	VBP1	9	-0.174387	0.00174429	0.0224861
P61764	STXBP1	10	0.00642441	0.999982	1
P61916	NPC2	11	0.0142887	0.999686	1
P61923	COPZ1	6	-0.0328848	0.930692	1
P61927	RPL37	4	-0.116211	0.366367	0.847597
P61956	SUMO2	1	0.00751993	0.946498	1
P61960	UFM1	1	-0.163732	0.124953	0.47612
P61962	DCAF7	4	-0.0475926	0.73356	1
P61964	WDR5	8	-0.0760933	0.489539	0.965091
P61966	AP1S1	3	-0.00974821	0.981991	1
P61970	NUTF2	5	-0.0342122	0.864	1
P61978	HNRNPK	33	-0.00738697	1	1
P61981	YWHAG	9	-0.000592177	1	1
P62070	RRAS2	6	0.118604	0.0915214	0.390132
P62072	TIMM10	3	-0.242237	0.0358354	0.213336
P62081	RPS7	13	-0.11777	0.0377178	0.220478
P62136	PPP1CA	4	0.0438122	0.766662	1
P62140	PPP1CB	3	0.055115	0.625425	1
P62166	NCS1	4	-0.145487	0.102213	0.420225
P62191	PSMC1	29	0.00982767	1	1
P62195	PSMC5	26	-0.0260226	0.999643	1
P62241	RPS8	19	-0.00519201	1	1
P62244	RPS15A	13	-0.0932065	0.229782	0.669272
P62249	RPS16	14	-0.0648607	0.585554	1
P62253	UBE2G1	3	-0.101731	0.220142	0.656023
P62256	UBE2H	2	0.386832	0.000571625	0.00882397
P62258	YWHAE	18	-0.0486318	0.897591	1
P62263	RPS14	7	-0.0838873	0.3198	0.794574
P62266	RPS23	10	-0.0816483	0.310203	0.783995
P62269	RPS18	12	-0.0777253	0.375388	0.858437
P62273	RPS29	2	-0.156756	0.188787	0.605028
P62277	RPS13	18	-0.0512064	0.808322	1
P62280	RPS11	20	-0.088803	0.325427	0.802981
P62304	SNRPE	3	0.08448	0.341542	0.822199
P62306	SNRPF	1	-0.0279607	0.778551	1
P62308	SNRPG	3	0.128679	0.20352	0.627996
P62310	LSM3	4	0.03765	0.954894	1
P62312	LSM6	6	-0.00638255	0.999718	1
P62314	SNRPD1	4	-0.0529509	0.726019	1
P62316	SNRPD2	11	-0.0454738	0.857843	1
P62318	SNRPD3	7	-0.0049558	0.999906	1
P62328	TMSB4X	5	-0.148328	0.393284	0.87982
P62330	ARF6	5	0.103755	0.164973	0.560711
P62333	PSMC6	25	-0.0240248	0.999957	1
P62380	TBPL1	1	-0.0752398	0.596113	1
P62424	RPL7A	24	-0.132168	0.00334999	0.0383707
P62487	POLR2G	3	-0.079568	0.429514	0.911616
P62495	ETF1	20	-0.176672	6.0244e-05	0.00118134
P62633	CNBP	3	-0.178872	0.11909	0.463139
P62699	YPEL5	2	0.184399	0.0907933	0.387753
P62701	RPS4X	25	-0.119829	0.00666318	0.0660049
P62714	PPP2CB	1	0.0857583	0.406749	0.894566
P62736	ACTA2	7	0.275892	2.58999e-05	0.000551407
P62745	RHOB	3	-0.0677904	0.531163	0.999345
P62750	RPL23A	11	-0.0262549	0.989723	1
P62753	RPS6	17	-0.150924	0.00667309	0.0660049
P62805	HIST1H4A	14	-0.0908159	0.213884	0.645371
P62820	RAB1A	5	-0.120242	0.348543	0.829619
P62826	RAN	11	-0.0981035	0.122019	0.469105
P62829	RPL23	9	-0.0676433	0.55113	1
P62834	RAP1A	4	-0.0977	0.438598	0.920429
P62841	RPS15	6	-0.192124	0.00997769	0.0881682
P62847	RPS24	4	-0.133417	0.0879372	0.381308
P62851	RPS25	5	-0.0792999	0.342523	0.822832
P62854	RPS26	5	-0.0678947	0.539989	1
[truncated: 3,727 more rows]
