# Supplementary material for: Re-expression of SMARCA4/BRG1 in small cell carcinoma of ovary, hypercalcemic type (SCCOHT) promotes an epithelial-like gene signature through an AP-1-dependent mechanism
Source: eLife. 2020 Dec 23;9:e59073. doi: 10.7554/eLife.59073 (PMC7813545; doi:10.7554/eLife.59073)
Supplement: Supplementary file 2. — Table of transcription factor motif analysis results for ATAC-seq gained peaks described in Figure 3e [file elife-59073-supp2.xlsx]

## Sheet: README
Supplemental Table 2 | Transcription Factor motif results for ATAC-seq gained peaks and BRG1 ChIP-seq peaks
Sheet A:	Table of transcription factor motif analysis results for ATAC-seq gained peaks described in Figure 3e
Sheet B:	Table of transcription factor motif analysis results for BRG1 ChIP-seq peaks described in Figure 3f.

## Sheet: A. GAINED ATAC-SEQ PEAKS
Motif.Name	Consensus	P.value	Log.P.value	q.value..Benjamini.	%..of.Target.Sequences.with.Motif.of.4023.	%..of.Target.Sequences.with.Motif	%..of.Background.Sequences.with.Motif.of.55068.	%..of.Background.Sequences.with.Motif	Ratio	labels
Fra1(bZIP)/BT549-Fra1-ChIP-Seq(GSE46166)/Homer	NNATGASTCATH	0	-1592	0	1928	47.92	6542.1	11.88	4.03367	Fra1
Atf3(bZIP)/GBM-ATF3-ChIP-Seq(GSE33912)/Homer	DATGASTCATHN	0	-1584	0	2045	50.83	7497.2	13.61	3.73475	Atf3
BATF(bZIP)/Th17-BATF-ChIP-Seq(GSE39756)/Homer	DATGASTCAT	0	-1546	0	2002	49.76	7313.6	13.28	3.74699	BATF
AP-1(bZIP)/ThioMac-PU.1-ChIP-Seq(GSE21512)/Homer	VTGACTCATC	0	-1545	0	2083	51.78	7985	14.49	3.5735	AP-1
JunB(bZIP)/DendriticCells-Junb-ChIP-Seq(GSE36099)/Homer	RATGASTCAT	0	-1545	0	1893	47.05	6463.2	11.73	4.01108	JunB
Fra2(bZIP)/Striatum-Fra2-ChIP-Seq(GSE43429)/Homer	GGATGACTCATC	0	-1523	0	1787	44.42	5760.2	10.46	4.24665	Fra2
Fosl2(bZIP)/3T3L1-Fosl2-ChIP-Seq(GSE56872)/Homer	NATGASTCABNN	0	-1314	0	1475	36.66	4352.7	7.9	4.64051	Fosl2
Jun-AP1(bZIP)/K562-cJun-ChIP-Seq(GSE31477)/Homer	GATGASTCATCN	0	-1129	0	1224	30.43	3369.1	6.12	4.97222	Jun-AP1
Bach2(bZIP)/OCILy7-Bach2-ChIP-Seq(GSE44420)/Homer	TGCTGAGTCA	1e-245	-565.8	0	748	18.59	2383.7	4.33	4.2933	Bach2
MafK(bZIP)/C2C12-MafK-ChIP-Seq(GSE36030)/Homer	GCTGASTCAGCA	1e-101	-234.5	0	443	11.01	1849.8	3.36	3.27679	MafK
NF-E2(bZIP)/K562-NFE2-ChIP-Seq(GSE31477)/Homer	GATGACTCAGCA	1e-95	-219.1	0	277	6.89	811.5	1.47	4.68707	NF-E2
TEAD1(TEAD)/HepG2-TEAD1-ChIP-Seq(Encode)/Homer	CYRCATTCCA	1e-88	-203.8	0	1024	25.45	7480.2	13.58	1.87408	TEAD1
TEAD(TEA)/Fibroblast-PU.1-ChIP-Seq(Unpublished)/Homer	YCWGGAATGY	1e-82	-189.6	0	814	20.23	5513.9	10.01	2.02098	TEAD
TEAD4(TEA)/Tropoblast-Tead4-ChIP-Seq(GSE37350)/Homer	CCWGGAATGY	1e-81	-188.2	0	913	22.69	6533.5	11.86	1.91315	TEAD4
TEAD3(TEA)/HepG2-TEAD3-ChIP-Seq(Encode)/Homer	TRCATTCCAG	1e-78	-181.4	0	1113	27.67	8760.3	15.9	1.74025	TEAD3
Sox15(HMG)/CPA-Sox15-ChIP-Seq(GSE62909)/Homer	RAACAATGGN	1e-73	-170.1	0	953	23.69	7204.8	13.08	1.81116	Sox15
Bach1(bZIP)/K562-Bach1-ChIP-Seq(GSE31477)/Homer	AWWNTGCTGAGTCAT	1e-73	-169.4	0	241	5.99	788.7	1.43	4.18881	Bach1
Nrf2(bZIP)/Lymphoblast-Nrf2-ChIP-Seq(GSE37589)/Homer	HTGCTGAGTCAT	1e-69	-160.5	0	213	5.29	652.6	1.18	4.48305	Nrf2
Sox10(HMG)/SciaticNerve-Sox3-ChIP-Seq(GSE35132)/Homer	CCWTTGTYYB	1e-67	-154.4	0	1255	31.2	10821.9	19.64	1.58859	Sox10
NFE2L2(bZIP)/HepG2-NFE2L2-ChIP-Seq(Encode)/Homer	AWWWTGCTGAGTCAT	1e-66	-154.1	0	207	5.15	641.8	1.17	4.40171	NFE2L2
TEAD2(TEA)/Py2T-Tead2-ChIP-Seq(GSE55709)/Homer	CCWGGAATGY	1e-66	-153.5	0	621	15.44	4050.5	7.35	2.10068	TEAD2
NF1(CTF)/LNCAP-NF1-ChIP-Seq(Unpublished)/Homer	CYTGGCABNSTGCCAR	1e-65	-150.5	0	435	10.81	2379.1	4.32	2.50231	NF1
Sox3(HMG)/NPC-Sox3-ChIP-Seq(GSE33059)/Homer	CCWTTGTY	1e-61	-140.8	0	1292	32.12	11516.3	20.9	1.53684	Sox3
Sox17(HMG)/Endoderm-Sox17-ChIP-Seq(GSE61475)/Homer	CCATTGTTYB	1e-60	-138.8	0	720	17.9	5220.4	9.48	1.88819	Sox17
Sox2(HMG)/mES-Sox2-ChIP-Seq(GSE11431)/Homer	BCCATTGTTC	1e-60	-138.5	0	789	19.61	5939.5	10.78	1.81911	Sox2
Sox6(HMG)/Myotubes-Sox6-ChIP-Seq(GSE32627)/Homer	CCATTGTTNY	1e-54	-125.1	0	1179	29.31	10513.1	19.08	1.53616	Sox6
KLF5(Zf)/LoVo-KLF5-ChIP-Seq(GSE49402)/Homer	DGGGYGKGGC	1e-48	-111.5	0	711	17.67	5535.2	10.05	1.75821	KLF5
MafA(bZIP)/Islet-MafA-ChIP-Seq(GSE30298)/Homer	TGCTGACTCA	1e-46	-108.1	0	703	17.47	5506.4	10	1.747	MafA
Sox4(HMG)/proB-Sox4-ChIP-Seq(GSE50066)/Homer	YCTTTGTTCC	1e-41	-95.74	0	679	16.88	5458.2	9.91	1.70333	Sox4
RUNX(Runt)/HPC7-Runx1-ChIP-Seq(GSE22178)/Homer	SAAACCACAG	1e-36	-84.11	0	569	14.14	4485.5	8.14	1.7371	RUNX
Tlx?(NR)/NPC-H3K4me1-ChIP-Seq(GSE16256)/Homer	CTGGCAGSCTGCCA	1e-34	-78.39	0	381	9.47	2651.3	4.81	1.96881	Tlx?
c-Jun-CRE(bZIP)/K562-cJun-ChIP-Seq(GSE31477)/Homer	ATGACGTCATCY	1e-33	-76.14	0	342	8.5	2302.2	4.18	2.03349	c-Jun-CRE
Atf7(bZIP)/3T3L1-Atf7-ChIP-Seq(GSE56872)/Homer	NGRTGACGTCAY	1e-32	-74.91	0	430	10.69	3190.7	5.79	1.84629	Atf7
MafB(bZIP)/BMM-Mafb-ChIP-Seq(GSE75722)/Homer	WNTGCTGASTCAGCANWTTY	1e-30	-69.9	0	396	9.84	2921.5	5.3	1.8566	MafB
NF1-halfsite(CTF)/LNCaP-NF1-ChIP-Seq(Unpublished)/Homer	YTGCCAAG	1e-27	-64.46	0	1115	27.72	11240.3	20.4	1.35882	NF1-halfsite
KLF6(Zf)/PDAC-KLF6-ChIP-Seq(GSE64557)/Homer	MKGGGYGTGGCC	1e-27	-64.45	0	518	12.88	4294.8	7.8	1.65128	KLF6
RUNX-AML(Runt)/CD4+-PolII-ChIP-Seq(Barski_et_al.)/Homer	GCTGTGGTTW	1e-26	-61.7	0	554	13.77	4742	8.61	1.5993	RUNX-AML
Atf2(bZIP)/3T3L1-Atf2-ChIP-Seq(GSE56872)/Homer	NRRTGACGTCAT	1e-26	-60.61	0	320	7.95	2296.7	4.17	1.90647	Atf2
RUNX1(Runt)/Jurkat-RUNX1-ChIP-Seq(GSE29180)/Homer	AAACCACARM	1e-25	-58.71	0	718	17.85	6665.7	12.1	1.47521	RUNX1
RUNX2(Runt)/PCa-RUNX2-ChIP-Seq(GSE33889)/Homer	NWAACCACADNN	1e-25	-57.94	0	623	15.49	5596.2	10.16	1.52461	RUNX2
Klf4(Zf)/mES-Klf4-ChIP-Seq(GSE11431)/Homer	GCCACACCCA	1e-23	-54.56	0	238	5.92	1581.7	2.87	2.06272	Klf4
Atf1(bZIP)/K562-ATF1-ChIP-Seq(GSE31477)/Homer	GATGACGTCA	1e-20	-47.05	0	468	11.63	4106.3	7.45	1.56107	Atf1
Sp2(Zf)/HEK293-Sp2.eGFP-ChIP-Seq(Encode)/Homer	YGGCCCCGCCCC	1e-19	-44.61	0	640	15.91	6132.4	11.13	1.42947	Sp2
KLF3(Zf)/MEF-Klf3-ChIP-Seq(GSE44748)/Homer	NRGCCCCRCCCHBNN	1e-16	-37.59	0	231	5.74	1753.5	3.18	1.80503	KLF3
JunD(bZIP)/K562-JunD-ChIP-Seq/Homer	ATGACGTCATCN	1e-14	-33.4	0	99	2.46	552.8	1	2.46	JunD
EKLF(Zf)/Erythrocyte-Klf1-ChIP-Seq(GSE20478)/Homer	NWGGGTGTGGCY	1e-14	-33.2	0	157	3.9	1084.9	1.97	1.9797	EKLF
Maz(Zf)/HepG2-Maz-ChIP-Seq(GSE31477)/Homer	GGGGGGGG	1e-13	-31.15	0	409	10.17	3831.2	6.95	1.46331	Maz
Pdx1(Homeobox)/Islet-Pdx1-ChIP-Seq(SRA008281)/Homer	YCATYAATCA	1e-11	-26.14	0	597	14.84	6216.2	11.28	1.3156	Pdx1
Bcl6(Zf)/Liver-Bcl6-ChIP-Seq(GSE31578)/Homer	NNNCTTTCCAGGAAA	1e-10	-23.3	0	726	18.05	7921.4	14.38	1.25522	Bcl6
PBX2(Homeobox)/K562-PBX2-ChIP-Seq(Encode)/Homer	RTGATTKATRGN	1e-09	-21.5	0	493	12.25	5133.4	9.32	1.31438	PBX2
NFIL3(bZIP)/HepG2-NFIL3-ChIP-Seq(Encode)/Homer	VTTACGTAAYNNNNN	1e-08	-20.42	0	361	8.97	3595.5	6.53	1.37366	NFIL3
Sox9(HMG)/Limb-SOX9-ChIP-Seq(GSE73225)/Homer	AGGVNCCTTTGT	1e-07	-18.38	0	503	12.5	5382.5	9.77	1.27943	Sox9
Foxo3(Forkhead)/U2OS-Foxo3-ChIP-Seq(E-MTAB-2701)/Homer	DGTAAACA	1e-07	-17.17	0	418	10.39	4396.5	7.98	1.30201	Foxo3
FOXA1(Forkhead)/LNCAP-FOXA1-ChIP-Seq(GSE27824)/Homer	WAAGTAAACA	1e-07	-16.79	0	622	15.46	6932.7	12.58	1.22893	FOXA1
FOXA1(Forkhead)/MCF7-FOXA1-ChIP-Seq(GSE26831)/Homer	WAAGTAAACA	1e-07	-16.63	0	511	12.7	5558.9	10.09	1.25867	FOXA1
KLF14(Zf)/HEK293-KLF14.GFP-ChIP-Seq(GSE58341)/Homer	RGKGGGCGKGGC	1e-06	-16.07	0	590	14.67	6568.5	11.92	1.2307	KLF14
FoxL2(Forkhead)/Ovary-FoxL2-ChIP-Seq(GSE60858)/Homer	WWTRTAAACAVG	1e-06	-15.8	0	436	10.84	4673.5	8.48	1.2783	FoxL2
NFkB-p65(RHD)/GM12787-p65-ChIP-Seq(GSE19485)/Homer	WGGGGATTTCCC	1e-06	-15.75	0	258	6.41	2541.6	4.61	1.39046	NFkB-p65
Rfx1(HTH)/NPC-H3K4me1-ChIP-Seq(GSE16256)/Homer	KGTTGCCATGGCAA	1e-06	-15.01	0	115	2.86	953.9	1.73	1.65318	Rfx1
TR4(NR),DR1/Hela-TR4-ChIP-Seq(GSE24685)/Homer	GAGGTCAAAGGTCA	1e-06	-14.91	0	62	1.54	419	0.76	2.02632	TR4
Foxo1(Forkhead)/RAW-Foxo1-ChIP-Seq(Fan_et_al.)/Homer	CTGTTTAC	1e-06	-14.53	0	972	24.16	11543.4	20.95	1.15322	Foxo1
OCT:OCT-short(POU,Homeobox)/NPC-OCT6-ChIP-Seq(GSE43916)/Homer	ATGCATWATGCATRW	1e-06	-14.51	0	429	10.66	4645.3	8.43	1.26453	OCT:OCT-short
Foxf1(Forkhead)/Lung-Foxf1-ChIP-Seq(GSE77951)/Homer	WWATRTAAACAN	1e-06	-14.33	0	458	11.38	5011.9	9.1	1.25055	Foxf1
NFAT:AP1(RHD,bZIP)/Jurkat-NFATC1-ChIP-Seq(Jolma_et_al.)/Homer	SARTGGAAAAWRTGAGTCAB	1e-06	-13.96	0	136	3.38	1203.5	2.18	1.55046	NFAT:AP1
NF1:FOXA1(CTF,Forkhead)/LNCAP-FOXA1-ChIP-Seq(GSE27824)/Homer	WNTGTTTRYTTTGGCA	1e-06	-13.91	0	46	1.14	282.1	0.51	2.23529	NF1:FOXA1
Smad3(MAD)/NPC-Smad3-ChIP-Seq(GSE36673)/Homer	TWGTCTGV	1e-05	-13.76	0	1463	36.37	18077	32.81	1.1085	Smad3
EAR2(NR)/K562-NR2F6-ChIP-Seq(Encode)/Homer	NRBCARRGGTCA	1e-05	-13.73	0	649	16.13	7440.8	13.51	1.19393	EAR2
CRE(bZIP)/Promoter/Homer	CSGTGACGTCAC	1e-05	-13.7	0	108	2.68	905	1.64	1.63415	CRE
Nkx6.1(Homeobox)/Islet-Nkx6.1-ChIP-Seq(GSE40975)/Homer	GKTAATGR	1e-05	-13.64	0	1351	33.58	16595.9	30.13	1.1145	Nkx6.1
COUP-TFII(NR)/K562-NR2F1-ChIP-Seq(Encode)/Homer	GKBCARAGGTCA	1e-05	-13.62	0	703	17.47	8134.8	14.77	1.1828	COUP-TFII
FOXK1(Forkhead)/HEK293-FOXK1-ChIP-Seq(GSE51673)/Homer	NVWTGTTTAC	1e-05	-13.61	0	542	13.47	6095.1	11.06	1.2179	FOXK1
Sp5(Zf)/mES-Sp5.Flag-ChIP-Seq(GSE72989)/Homer	RGKGGGCGGAGC	1e-05	-12.71	0	336	8.35	3587.4	6.51	1.28264	Sp5
Gata1(Zf)/K562-GATA1-ChIP-Seq(GSE18829)/Homer	SAGATAAGRV	1e-05	-12.67	0	311	7.73	3285.4	5.96	1.29698	Gata1
Gata2(Zf)/K562-GATA2-ChIP-Seq(GSE18829)/Homer	BBCTTATCTS	1e-05	-12.67	0	341	8.48	3650.7	6.63	1.27903	Gata2
Hoxc9(Homeobox)/Ainv15-Hoxc9-ChIP-Seq(GSE21812)/Homer	GGCCATAAATCA	1e-05	-12.5	0	276	6.86	2870.4	5.21	1.3167	Hoxc9
FOXP1(Forkhead)/H9-FOXP1-ChIP-Seq(GSE31006)/Homer	NYYTGTTTACHN	1e-05	-12.41	0	240	5.97	2444.7	4.44	1.34459	FOXP1
GATA(Zf),IR3/iTreg-Gata3-ChIP-Seq(GSE20898)/Homer	NNNNNBAGATAWYATCTVHN	1e-05	-12.38	0	110	2.73	955.8	1.73	1.57803	GATA
Rfx2(HTH)/LoVo-RFX2-ChIP-Seq(GSE49402)/Homer	GTTGCCATGGCAACM	1e-05	-12.33	0	51	1.27	347.5	0.63	2.01587	Rfx2
Cdx2(Homeobox)/mES-Cdx2-ChIP-Seq(GSE14586)/Homer	GYMATAAAAH	1e-05	-12.12	0	340	8.45	3662.7	6.65	1.27068	Cdx2
Gata6(Zf)/HUG1N-GATA6-ChIP-Seq(GSE51936)/Homer	YCTTATCTBN	1e-05	-11.75	0	450	11.19	5042.2	9.15	1.22295	Gata6
WT1(Zf)/Kidney-WT1-ChIP-Seq(GSE90016)/Homer	MCTCCCMCRCAB	0.0001	-11.2	0.0001	230	5.72	2370.8	4.3	1.33023	WT1
GATA3(Zf)/iTreg-Gata3-ChIP-Seq(GSE20898)/Homer	AGATAASR	0.0001	-11.16	0.0001	730	18.15	8642.8	15.69	1.15679	GATA3
ZNF416(Zf)/HEK293-ZNF416.GFP-ChIP-Seq(GSE58341)/Homer	WDNCTGGGCA	0.0001	-10.97	0.0001	715	17.77	8462.8	15.36	1.1569	ZNF416
Foxa2(Forkhead)/Liver-Foxa2-ChIP-Seq(GSE25694)/Homer	CYTGTTTACWYW	0.0001	-10.9	0.0001	432	10.74	4863.6	8.83	1.21631	Foxa2
Foxa3(Forkhead)/Liver-Foxa3-ChIP-Seq(GSE77670)/Homer	BSNTGTTTACWYWGN	0.0001	-10.52	0.0001	197	4.9	2003.1	3.64	1.34615	Foxa3
FOXM1(Forkhead)/MCF7-FOXM1-ChIP-Seq(GSE72977)/Homer	TRTTTACTTW	0.0001	-10.48	0.0001	516	12.83	5947.8	10.8	1.18796	FOXM1
HIF-1a(bHLH)/MCF7-HIF1a-ChIP-Seq(GSE28352)/Homer	TACGTGCV	0.0001	-9.787	0.0003	88	2.19	774.3	1.41	1.55319	HIF-1a
X-box(HTH)/NPC-H3K4me1-ChIP-Seq(GSE16256)/Homer	GGTTGCCATGGCAA	0.0001	-9.405	0.0004	64	1.59	524.6	0.95	1.67368	X-box
Gata4(Zf)/Heart-Gata4-ChIP-Seq(GSE35151)/Homer	NBWGATAAGR	0.0001	-9.374	0.0004	498	12.38	5788.7	10.51	1.17793	Gata4
RFX(HTH)/K562-RFX3-ChIP-Seq(SRA012198)/Homer	CGGTTGCCATGGCAAC	0.0001	-9.266	0.0004	41	1.02	292.1	0.53	1.92453	RFX
Stat3+il21(Stat)/CD4-Stat3-ChIP-Seq(GSE19198)/Homer	SVYTTCCNGGAARB	0.0001	-9.23	0.0004	348	8.65	3904.7	7.09	1.22003	Stat3+il21
AP-2gamma(AP2)/MCF7-TFAP2C-ChIP-Seq(GSE21234)/Homer	SCCTSAGGSCAW	0.001	-9.075	0.0005	444	11.04	5121.7	9.3	1.1871	AP-2gamma
PAX3:FKHR-fusion(Paired,Homeobox)/Rh4-PAX3:FKHR-ChIP-Seq(GSE19063)/Homer	ACCRTGACTAATTNN	0.001	-8.929	0.0006	125	3.11	1214.5	2.2	1.41364	PAX3:FKHR-fusion
STAT4(Stat)/CD4-Stat4-ChIP-Seq(GSE22104)/Homer	NYTTCCWGGAAR	0.001	-8.889	0.0006	482	11.98	5616.5	10.2	1.17451	STAT4
Reverb(NR),DR2/RAW-Reverba.biotin-ChIP-Seq(GSE45914)/Homer	GTRGGTCASTGGGTCA	0.001	-8.853	0.0006	82	2.04	730.4	1.33	1.53383	Reverb
Pit1+1bp(Homeobox)/GCrat-Pit1-ChIP-Seq(GSE58009)/Homer	ATGCATAATTCA	0.001	-8.84	0.0006	178	4.42	1840.1	3.34	1.32335	Pit1+1bp
ZFX(Zf)/mES-Zfx-ChIP-Seq(GSE11431)/Homer	AGGCCTRG	0.001	-8.48	0.0009	557	13.85	6605.1	11.99	1.15513	ZFX
Hoxa9(Homeobox)/ChickenMSG-Hoxa9.Flag-ChIP-Seq(GSE86088)/Homer	RGCAATNAAA	0.001	-8.379	0.001	1360	33.81	17197.9	31.22	1.08296	Hoxa9
Lhx2(Homeobox)/HFSC-Lhx2-ChIP-Seq(GSE48068)/Homer	TAATTAGN	0.001	-8.262	0.0011	542	13.47	6428.3	11.67	1.15424	Lhx2
HIF2a(bHLH)/785_O-HIF2a-ChIP-Seq(GSE34871)/Homer	GCACGTACCC	0.001	-8.221	0.0011	121	3.01	1190.8	2.16	1.39352	HIF2a
Esrrb(NR)/mES-Esrrb-ChIP-Seq(GSE11431)/Homer	KTGACCTTGA	0.001	-8.187	0.0011	306	7.61	3437.6	6.24	1.21955	Esrrb
Fox:Ebox(Forkhead,bHLH)/Panc1-Foxa2-ChIP-Seq(GSE47459)/Homer	NNNVCTGWGYAAACASN	0.001	-8.119	0.0012	505	12.55	5963.7	10.83	1.15882	Fox:Ebox
Klf9(Zf)/GBM-Klf9-ChIP-Seq(GSE62211)/Homer	GCCACRCCCACY	0.001	-7.795	0.0017	115	2.86	1134	2.06	1.38835	Klf9
Rfx6(HTH)/Min6b1-Rfx6.HA-ChIP-Seq(GSE62844)/Homer	TGTTKCCTAGCAACM	0.001	-7.733	0.0017	486	12.08	5747.7	10.43	1.1582	Rfx6
Hoxb4(Homeobox)/ES-Hoxb4-ChIP-Seq(GSE34014)/Homer	TGATTRATGGCY	0.001	-7.702	0.0018	115	2.86	1137.1	2.06	1.38835	Hoxb4
NFkB-p65-Rel(RHD)/ThioMac-LPS-Expression(GSE23622)/Homer	GGAAATTCCC	0.001	-7.549	0.0021	48	1.19	391.6	0.71	1.67606	NFkB-p65-Rel
Stat3(Stat)/mES-Stat3-ChIP-Seq(GSE11431)/Homer	CTTCCGGGAA	0.001	-7.546	0.0021	250	6.21	2775.5	5.04	1.23214	Stat3
Six4(Homeobox)/MCF7-SIX4-ChIP-Seq(Encode)/Homer	TGWAAYCTGABACCB	0.001	-7.346	0.0025	37	0.92	281.5	0.51	1.80392	Six4
Egr1(Zf)/K562-Egr1-ChIP-Seq(GSE32465)/Homer	TGCGTGGGYG	0.001	-7.28	0.0026	199	4.95	2160.8	3.92	1.26276	Egr1
ZNF669(Zf)/HEK293-ZNF669.GFP-ChIP-Seq(GSE58341)/Homer	GARTGGTCATCGCCC	0.001	-7.272	0.0026	35	0.87	262	0.48	1.8125	ZNF669
ZNF711(Zf)/SHSY5Y-ZNF711-ChIP-Seq(GSE20673)/Homer	AGGCCTAG	0.001	-7.27	0.0026	714	17.75	8742.8	15.87	1.11846	ZNF711
Isl1(Homeobox)/Neuron-Isl1-ChIP-Seq(GSE31456)/Homer	CTAATKGV	0.001	-7.195	0.0028	965	23.99	12056.3	21.88	1.09644	Isl1
STAT6(Stat)/CD4-Stat6-ChIP-Seq(GSE22104)/Homer	ABTTCYYRRGAA	0.01	-6.596	0.005	270	6.71	3077.3	5.59	1.20036	STAT6
CDX4(Homeobox)/ZebrafishEmbryos-Cdx4.Myc-ChIP-Seq(GSE48254)/Homer	NGYCATAAAWCH	0.01	-6.57	0.0051	410	10.19	4857.5	8.82	1.15533	CDX4
IRF1(IRF)/PBMC-IRF1-ChIP-Seq(GSE43036)/Homer	GAAAGTGAAAGT	0.01	-6.553	0.0051	82	2.04	791.2	1.44	1.41667	IRF1
Chop(bZIP)/MEF-Chop-ChIP-Seq(GSE35681)/Homer	ATTGCATCAT	0.01	-6.552	0.0051	148	3.68	1572.9	2.86	1.28671	Chop
Six1(Homeobox)/Myoblast-Six1-ChIP-Chip(GSE20150)/Homer	GKVTCADRTTWC	0.01	-6.343	0.0062	138	3.43	1460.4	2.65	1.29434	Six1
Arnt:Ahr(bHLH)/MCF7-Arnt-ChIP-Seq(Lo_et_al.)/Homer	TBGCACGCAA	0.01	-6.258	0.0067	206	5.12	2297.8	4.17	1.22782	Arnt:Ahr
HOXB13(Homeobox)/ProstateTumor-HOXB13-ChIP-Seq(GSE56288)/Homer	TTTTATKRGG	0.01	-6.211	0.007	481	11.96	5800	10.53	1.1358	HOXB13
PAX5(Paired,Homeobox),condensed/GM12878-PAX5-ChIP-Seq(GSE32465)/Homer	GTCACGCTCSCTGM	0.01	-6.209	0.007	54	1.34	484.6	0.88	1.52273	PAX5
Pax8(Paired,Homeobox)/Thyroid-Pax8-ChIP-Seq(GSE26938)/Homer	GTCATGCHTGRCTGS	0.01	-6.158	0.0072	167	4.15	1821	3.31	1.25378	Pax8
Unknown(Homeobox)/Limb-p300-ChIP-Seq/Homer	SSCMATWAAA	0.01	-6.122	0.0074	297	7.38	3447.5	6.26	1.17891	Unknown
COUP-TFII(NR)/Artia-Nr2f2-ChIP-Seq(GSE46497)/Homer	AGRGGTCA	0.01	-6.099	0.0076	818	20.33	10225.1	18.56	1.09537	COUP-TFII
Nur77(NR)/K562-NR4A1-ChIP-Seq(GSE31363)/Homer	TGACCTTTNCNT	0.01	-6.068	0.0077	94	2.34	946.3	1.72	1.36047	Nur77
Atf4(bZIP)/MEF-Atf4-ChIP-Seq(GSE35681)/Homer	MTGATGCAAT	0.01	-6.062	0.0077	172	4.28	1887.3	3.43	1.24781	Atf4
RXR(NR),DR1/3T3L1-RXR-ChIP-Seq(GSE13511)/Homer	TAGGGCAAAGGTCA	0.01	-6.059	0.0077	502	12.48	6085.9	11.05	1.12941	RXR
Hoxd11(Homeobox)/ChickenMSG-Hoxd11.Flag-ChIP-Seq(GSE86088)/Homer	VGCCATAAAA	0.01	-6.035	0.0078	1140	28.34	14517.4	26.35	1.07552	Hoxd11
Lhx3(Homeobox)/Neuron-Lhx3-ChIP-Seq(GSE31456)/Homer	ADBTAATTAR	0.01	-6.021	0.0078	834	20.73	10445.1	18.96	1.09335	Lhx3
Usf2(bHLH)/C2C12-Usf2-ChIP-Seq(GSE36030)/Homer	GTCACGTGGT	0.01	-5.997	0.008	152	3.78	1645.8	2.99	1.26421	Usf2
ISRE(IRF)/ThioMac-LPS-Expression(GSE23622)/Homer	AGTTTCASTTTC	0.01	-5.977	0.0081	39	0.97	326.9	0.59	1.64407	ISRE
Zfp281(Zf)/ES-Zfp281-ChIP-Seq(GSE81042)/Homer	CCCCTCCCCCAC	0.01	-5.965	0.0081	44	1.09	380.1	0.69	1.57971	Zfp281
ZNF322(Zf)/HEK293-ZNF322.GFP-ChIP-Seq(GSE58341)/Homer	GAGCCTGGTACTGWGCCTGR	0.01	-5.933	0.0083	134	3.33	1429.1	2.59	1.28571	ZNF322
ELF3(ETS)/PDAC-ELF3-ChIP-Seq(GSE64557)/Homer	ANCAGGAAGT	0.01	-5.887	0.0086	342	8.5	4036.4	7.33	1.15962	ELF3
MITF(bHLH)/MastCells-MITF-ChIP-Seq(GSE48085)/Homer	RTCATGTGAC	0.01	-5.879	0.0086	476	11.83	5763.8	10.46	1.13098	MITF
Smad2(MAD)/ES-SMAD2-ChIP-Seq(GSE29422)/Homer	CTGTCTGG	0.01	-5.874	0.0086	708	17.6	8797.4	15.97	1.10207	Smad2
Mef2d(MADS)/Retina-Mef2d-ChIP-Seq(GSE61391)/Homer	GCTATTTTTAGC	0.01	-5.793	0.0093	81	2.01	803	1.46	1.37671	Mef2d
KLF10(Zf)/HEK293-KLF10.GFP-ChIP-Seq(GSE58341)/Homer	GGGGGTGTGTCC	0.01	-5.781	0.0093	228	5.67	2598.5	4.72	1.20127	KLF10
FOXK2(Forkhead)/U2OS-FOXK2-ChIP-Seq(E-MTAB-2204)/Homer	SCHTGTTTACAT	0.01	-5.699	0.01	313	7.78	3679	6.68	1.16467	FOXK2
Mef2b(MADS)/HEK293-Mef2b.V5-ChIP-Seq(GSE67450)/Homer	GCTATTTTTGGM	0.01	-5.668	0.0103	365	9.07	4347.6	7.89	1.14956	Mef2b
RORgt(NR)/EL4-RORgt.Flag-ChIP-Seq(GSE56019)/Homer	AAYTAGGTCA	0.01	-5.608	0.0108	78	1.94	774.2	1.41	1.37589	RORgt
RORgt(NR)/EL4-RORgt.Flag-ChIP-Seq(GSE56019)/Homer	AAYTAGGTCA	0.01	-5.608	0.0108	78	1.94	774.2	1.41	1.37589	RORgt
AP-2alpha(AP2)/Hela-AP2alpha-ChIP-Seq(GSE31477)/Homer	ATGCCCTGAGGC	0.01	-5.383	0.0134	321	7.98	3804.2	6.91	1.15485	AP-2alpha
Nanog(Homeobox)/mES-Nanog-ChIP-Seq(GSE11724)/Homer	RGCCATTAAC	0.01	-5.331	0.014	2023	50.29	26572.5	48.23	1.04271	Nanog
USF1(bHLH)/GM12878-Usf1-ChIP-Seq(GSE32465)/Homer	SGTCACGTGR	0.01	-5.205	0.0158	181	4.5	2043.4	3.71	1.21294	USF1
ETV4(ETS)/HepG2-ETV4-ChIP-Seq(ENCODE)/Homer	ACCGGAAGTG	0.01	-5.139	0.0167	435	10.81	5295.2	9.61	1.12487	ETV4
Mef2c(MADS)/GM12878-Mef2c-ChIP-Seq(GSE32465)/Homer	DCYAAAAATAGM	0.01	-5.045	0.0183	181	4.5	2052.4	3.73	1.20643	Mef2c
Rfx5(HTH)/GM12878-Rfx5-ChIP-Seq(GSE31477)/Homer	SCCTAGCAACAG	0.01	-4.986	0.0192	154	3.83	1719.1	3.12	1.22756	Rfx5
Oct4:Sox17(POU,Homeobox,HMG)/F9-Sox17-ChIP-Seq(GSE44553)/Homer	CCATTGTATGCAAAT	0.01	-4.937	0.0201	84	2.09	868.7	1.58	1.32278	Oct4:Sox17
DMRT6(DM)/Testis-DMRT6-ChIP-Seq(GSE60440)/Homer	YDGHTACAWTGTADC	0.01	-4.831	0.0222	97	2.41	1028.6	1.87	1.28877	DMRT6
Erra(NR)/HepG2-Erra-ChIP-Seq(GSE31477)/Homer	CAAAGGTCAG	0.01	-4.797	0.0228	988	24.56	12641.1	22.95	1.07015	Erra
Ets1-distal(ETS)/CD4+-PolII-ChIP-Seq(Barski_et_al.)/Homer	MACAGGAAGT	0.01	-4.795	0.0228	149	3.7	1667.3	3.03	1.22112	Ets1-distal
HIC1(Zf)/Treg-ZBTB29-ChIP-Seq(GSE99889)/Homer	TGCCAGCB	0.01	-4.762	0.0233	1023	25.43	13114.3	23.81	1.06804	HIC1
p53(p53)/mES-cMyc-ChIP-Seq(GSE11431)/Homer	ACATGCCCGGGCAT	0.01	-4.725	0.024	15	0.37	101.2	0.18	2.05556	p53
ZNF519(Zf)/HEK293-ZNF519.GFP-ChIP-Seq(GSE58341)/Homer	GAGSCCGAGC	0.01	-4.712	0.0242	77	1.91	793.7	1.44	1.32639	ZNF519
Ap4(bHLH)/AML-Tfap4-ChIP-Seq(GSE45738)/Homer	NAHCAGCTGD	0.01	-4.685	0.0247	605	15.04	7566.2	13.73	1.09541	Ap4
Hoxd13(Homeobox)/ChickenMSG-Hoxd13.Flag-ChIP-Seq(GSE86088)/Homer	NCYAATAAAA	0.1	-4.558	0.0278	741	18.42	9380.4	17.03	1.08162	Hoxd13
HLF(bZIP)/HSC-HLF.Flag-ChIP-Seq(GSE69817)/Homer	RTTATGYAAB	0.1	-4.552	0.0278	412	10.24	5049.6	9.17	1.11668	HLF
PPARE(NR),DR1/3T3L1-Pparg-ChIP-Seq(GSE13511)/Homer	TGACCTTTGCCCCA	0.1	-4.544	0.0279	418	10.39	5128.1	9.31	1.116	PPARE
Fli1(ETS)/CD8-FLI-ChIP-Seq(GSE20898)/Homer	NRYTTCCGGH	0.1	-4.468	0.0299	449	11.16	5540.9	10.06	1.10934	Fli1
ERE(NR),IR3/MCF7-ERa-ChIP-Seq(Unpublished)/Homer	VAGGTCACNSTGACC	0.1	-4.451	0.0302	129	3.21	1437.2	2.61	1.22989	ERE
HOXA2(Homeobox)/mES-Hoxa2-ChIP-Seq(Donaldson_et_al.)/Homer	GYCATCMATCAT	0.1	-4.416	0.0311	55	1.37	544.9	0.99	1.38384	HOXA2
IRF3(IRF)/BMDM-Irf3-ChIP-Seq(GSE67343)/Homer	AGTTTCAKTTTC	0.1	-4.392	0.0316	145	3.6	1639.3	2.98	1.20805	IRF3
p73(p53)/Trachea-p73-ChIP-Seq(PRJNA310161)/Homer	NRRRCAWGTCCDGRCATGYY	0.1	-4.318	0.0338	30	0.75	263.8	0.48	1.5625	p73
Hoxa13(Homeobox)/ChickenMSG-Hoxa13.Flag-ChIP-Seq(GSE86088)/Homer	CYHATAAAAN	0.1	-4.271	0.0352	1170	29.08	15158.2	27.52	1.05669	Hoxa13
Srebp1a(bHLH)/HepG2-Srebp1a-ChIP-Seq(GSE31477)/Homer	RTCACSCCAY	0.1	-4.244	0.036	114	2.83	1262.9	2.29	1.23581	Srebp1a
PAX5(Paired,Homeobox)/GM12878-PAX5-ChIP-Seq(GSE32465)/Homer	GCAGCCAAGCRTGACH	0.1	-4.231	0.0363	170	4.23	1962.1	3.56	1.1882	PAX5
EWS:ERG-fusion(ETS)/CADO_ES1-EWS:ERG-ChIP-Seq(SRA014231)/Homer	ATTTCCTGTN	0.1	-4.229	0.0363	358	8.9	4376.7	7.94	1.12091	EWS:ERG-fusion
HOXA1(Homeobox)/mES-Hoxa1-ChIP-Seq(SRP084292)/Homer	TGATKGATGR	0.1	-4.156	0.0386	128	3.18	1440.4	2.61	1.21839	HOXA1
HRE(HSF)/Striatum-HSF1-ChIP-Seq(GSE38000)/Homer	TTCTAGAABNTTCTA	0.1	-4.146	0.0388	89	2.21	960.6	1.74	1.27011	HRE
IRF2(IRF)/Erythroblas-IRF2-ChIP-Seq(GSE36985)/Homer	GAAASYGAAASY	0.1	-4.109	0.04	59	1.47	601.6	1.09	1.34862	IRF2
Rbpj1(?)/Panc1-Rbpj1-ChIP-Seq(GSE47459)/Homer	HTTTCCCASG	0.1	-4.029	0.0431	705	17.52	8968.9	16.28	1.07617	Rbpj1
Hand2(bHLH)/Mesoderm-Hand2-ChIP-Seq(GSE61475)/Homer	TGACANARRCCAGRC	0.1	-3.959	0.0459	226	5.62	2693	4.89	1.14928	Hand2
Etv2(ETS)/ES-ER71-ChIP-Seq(GSE59402)/Homer(0.967)	NNAYTTCCTGHN	0.1	-3.947	0.0462	413	10.27	5121.1	9.3	1.1043	Etv2
PAX6(Paired,Homeobox)/Forebrain-Pax6-ChIP-Seq(GSE66961)/Homer	NGTGTTCAVTSAAGCGKAAA	0.1	-3.939	0.0463	49	1.22	489	0.89	1.37079	PAX6
ERG(ETS)/VCaP-ERG-ChIP-Seq(GSE14097)/Homer	ACAGGAAGTG	0.1	-3.886	0.0486	706	17.55	9000.2	16.34	1.07405	ERG
PPARa(NR),DR1/Liver-Ppara-ChIP-Seq(GSE47954)/Homer	VNAGGKCAAAGGTCA	0.1	-3.821	0.0515	470	11.68	5883.8	10.68	1.09363	PPARa
ZNF317(Zf)/HEK293-ZNF317.GFP-ChIP-Seq(GSE58341)/Homer	GTCWGCTGTYYCTCT	0.1	-3.724	0.0565	45	1.12	449.7	0.82	1.36585	ZNF317
EBF1(EBF)/Near-E2A-ChIP-Seq(GSE21512)/Homer	GTCCCCWGGGGA	0.1	-3.676	0.0589	425	10.56	5307.9	9.63	1.09657	EBF1
STAT1(Stat)/HelaS3-STAT1-ChIP-Seq(GSE12782)/Homer	NATTTCCNGGAAAT	0.1	-3.641	0.0606	148	3.68	1721	3.12	1.17949	STAT1
ETV1(ETS)/GIST48-ETV1-ChIP-Seq(GSE22441)/Homer	AACCGGAAGT	0.1	-3.553	0.0659	561	13.94	7117	12.92	1.07895	ETV1
Zic(Zf)/Cerebellum-ZIC1.2-ChIP-Seq(GSE60731)/Homer	CCTGCTGAGH	0.1	-3.549	0.0659	374	9.3	4651.1	8.44	1.1019	Zic
Foxh1(Forkhead)/hESC-FOXH1-ChIP-Seq(GSE29422)/Homer	NNTGTGGATTSS	0.1	-3.466	0.0711	303	7.53	3731.3	6.77	1.11226	Foxh1
Zfp809(Zf)/ES-Zfp809-ChIP-Seq(GSE70799)/Homer	GGGGCTYGKCTGGGA	0.1	-3.464	0.0711	78	1.94	856.8	1.56	1.24359	Zfp809
Pitx1(Homeobox)/Chicken-Pitx1-ChIP-Seq(GSE38910)/Homer	TAATCCCN	0.1	-3.453	0.0712	1969	48.94	26150.8	47.47	1.03097	Pitx1
DMRT1(DM)/Testis-DMRT1-ChIP-Seq(GSE64892)/Homer	TWGHWACAWTGTWDC	0.1	-3.397	0.0749	112	2.78	1282.1	2.33	1.19313	DMRT1
EWS:FLI1-fusion(ETS)/SK_N_MC-EWS:FLI1-ChIP-Seq(SRA014231)/Homer	VACAGGAAAT	0.1	-3.352	0.0779	252	6.26	3078.5	5.59	1.11986	EWS:FLI1-fusion
Smad4(MAD)/ESC-SMAD4-ChIP-Seq(GSE29422)/Homer	VBSYGTCTGG	0.1	-3.241	0.0866	678	16.85	8716.6	15.82	1.06511	Smad4
ELF5(ETS)/T47D-ELF5-ChIP-Seq(GSE30407)/Homer	ACVAGGAAGT	0.1	-3.189	0.0908	313	7.78	3889.1	7.06	1.10198	ELF5
STAT6(Stat)/Macrophage-Stat6-ChIP-Seq(GSE38377)/Homer	TTCCKNAGAA	0.1	-3.105	0.0982	267	6.64	3296.7	5.98	1.11037	STAT6
ZNF467(Zf)/HEK293-ZNF467.GFP-ChIP-Seq(GSE58341)/Homer	TGGGGAAGGGCM	0.1	-3.012	0.1072	280	6.96	3475.2	6.31	1.10301	ZNF467
THRb(NR)/Liver-NR1A2-ChIP-Seq(GSE52613)/Homer	TRAGGTCA	0.1	-2.968	0.1114	1819	45.22	24198.2	43.93	1.02936	THRb
STAT5(Stat)/mCD4+-Stat5-ChIP-Seq(GSE12346)/Homer	RTTTCTNAGAAA	0.1	-2.79	0.1325	167	4.15	2025	3.68	1.12772	STAT5
GABPA(ETS)/Jurkat-GABPa-ChIP-Seq(GSE17954)/Homer	RACCGGAAGT	0.1	-2.657	0.1505	349	8.68	4422.7	8.03	1.08095	GABPA
HNF4a(NR),DR1/HepG2-HNF4a-ChIP-Seq(GSE25021)/Homer	CARRGKBCAAAGTYCA	0.1	-2.55	0.1666	205	5.1	2540.5	4.61	1.10629	HNF4a
PU.1:IRF8(ETS:IRF)/pDC-Irf8-ChIP-Seq(GSE66899)/Homer	GGAAGTGAAAST	0.1	-2.542	0.1671	102	2.54	1208.2	2.19	1.15982	PU.1:IRF8
RARa(NR)/K562-RARa-ChIP-Seq(Encode)/Homer	TTGAMCTTTG	0.1	-2.481	0.1768	1314	32.66	17428.5	31.64	1.03224	RARa
TFE3(bHLH)/MEF-TFE3-ChIP-Seq(GSE75757)/Homer	GTCACGTGACYV	0.1	-2.457	0.18	33	0.82	349.8	0.63	1.30159	TFE3
Hoxa11(Homeobox)/ChickenMSG-Hoxa11.Flag-ChIP-Seq(GSE86088)/Homer	TTTTATGGCM	0.1	-2.399	0.1899	1080	26.85	14273.4	25.91	1.03628	Hoxa11
FXR(NR),IR1/Liver-FXR-ChIP-Seq(Chong_et_al.)/Homer	AGGTCANTGACCTB	0.1	-2.388	0.191	182	4.52	2255.9	4.09	1.10513	FXR
Bcl11a(Zf)/HSPC-BCL11A-ChIP-Seq(GSE104676)/Homer	TYTGACCASWRG	0.1	-2.359	0.1957	411	10.22	5284.1	9.59	1.06569	Bcl11a
Tbr1(T-box)/Cortex-Tbr1-ChIP-Seq(GSE71384)/Homer	AAGGTGTKAA	1	-2.271	0.2125	669	16.63	8752.7	15.89	1.04657	Tbr1
Mef2a(MADS)/HL1-Mef2a.biotin-ChIP-Seq(GSE21529)/Homer	CYAAAAATAG	1	-2.246	0.2168	175	4.35	2177.9	3.95	1.10127	Mef2a
LEF1(HMG)/H1-LEF1-ChIP-Seq(GSE64758)/Homer	CCTTTGATST	1	-2.229	0.2194	298	7.41	3800.7	6.9	1.07391	LEF1
PGR(NR)/EndoStromal-PGR-ChIP-Seq(GSE69539)/Homer	AAGAACATWHTGTTC	1	-2.211	0.2224	103	2.56	1244.7	2.26	1.13274	PGR
bZIP:IRF(bZIP,IRF)/Th17-BatF-ChIP-Seq(GSE39756)/Homer	NAGTTTCABTHTGACTNW	1	-2.169	0.2307	214	5.32	2697	4.9	1.08571	bZIP:IRF
Dlx3(Homeobox)/Kerainocytes-Dlx3-ChIP-Seq(GSE89884)/Homer	NDGTAATTAC	1	-2.102	0.2457	289	7.18	3697.7	6.71	1.07004	Dlx3
ZNF136(Zf)/HEK293-ZNF136.GFP-ChIP-Seq(GSE58341)/Homer	YTKGATAHAGTATTCTWGGTNGGCA	1	-2.097	0.2458	41	1.02	462.5	0.84	1.21429	ZNF136
Egr2(Zf)/Thymocytes-Egr2-ChIP-Seq(GSE34254)/Homer	NGCGTGGGCGGR	1	-2.087	0.247	40	0.99	450.1	0.82	1.20732	Egr2
E2F(E2F)/Hela-CellCycle-Expression/Homer	TTSGCGCGAAAA	1	-2.05	0.255	10	0.25	90.4	0.16	1.5625	E2F
LXRE(NR),DR4/RAW-LXRb.biotin-ChIP-Seq(GSE21512)/Homer	RGGTTACTANAGGTCA	1	-2.045	0.2552	33	0.82	365.3	0.66	1.24242	LXRE
Lhx1(Homeobox)/EmbryoCarcinoma-Lhx1-ChIP-Seq(GSE70957)/Homer	NNYTAATTAR	1	-2.033	0.2569	513	12.75	6699.4	12.16	1.04852	Lhx1
EHF(ETS)/LoVo-EHF-ChIP-Seq(GSE49402)/Homer	AVCAGGAAGT	1	-2.014	0.2605	552	13.72	7226.5	13.12	1.04573	EHF
SCL(bHLH)/HPC7-Scl-ChIP-Seq(GSE13511)/Homer	AVCAGCTG	1	-2.002	0.2624	2089	51.93	28120.6	51.05	1.01724	SCL
ETS1(ETS)/Jurkat-ETS1-ChIP-Seq(GSE17954)/Homer	ACAGGAAGTG	1	-1.954	0.2742	441	10.96	5748	10.43	1.05081	ETS1
Tbx20(T-box)/Heart-Tbx20-ChIP-Seq(GSE29636)/Homer	GGTGYTGACAGS	1	-1.94	0.2768	105	2.61	1291.6	2.34	1.11538	Tbx20
p63(p53)/Keratinocyte-p63-ChIP-Seq(GSE17611)/Homer	NNDRCATGYCYNRRCATGYH	1	-1.939	0.2768	155	3.85	1945.4	3.53	1.09065	p63
RORg(NR)/Liver-Rorc-ChIP-Seq(GSE101115)/Homer	WAABTAGGTCAV	1	-1.855	0.2985	46	1.14	537.3	0.98	1.16327	RORg
IRF:BATF(IRF:bZIP)/pDC-Irf8-ChIP-Seq(GSE66899)/Homer	CTTTCANTATGACTV	1	-1.832	0.304	60	1.49	717.9	1.3	1.14615	IRF:BATF
HNF1b(Homeobox)/PDAC-HNF1B-ChIP-Seq(GSE64557)/Homer	GTTAATNATTAA	1	-1.793	0.3148	57	1.42	681.6	1.24	1.14516	HNF1b
GATA:SCL(Zf,bHLH)/Ter119-SCL-ChIP-Seq(GSE18720)/Homer	CRGCTGBNGNSNNSAGATAA	1	-1.782	0.3166	50	1.24	592.9	1.08	1.14815	GATA:SCL
ELF1(ETS)/Jurkat-ELF1-ChIP-Seq(SRA014231)/Homer	AVCCGGAAGT	1	-1.781	0.3166	148	3.68	1869.6	3.39	1.08555	ELF1
ETS:E-box(ETS,bHLH)/HPC7-Scl-ChIP-Seq(GSE22178)/Homer	AGGAARCAGCTG	1	-1.74	0.3272	40	0.99	467.2	0.85	1.16471	ETS:E-box
TATA-Box(TBP)/Promoter/Homer	CCTTTTAWAGSC	1	-1.626	0.3654	517	12.85	6829	12.4	1.03629	TATA-Box
IRF8(IRF)/BMDM-IRF8-ChIP-Seq(GSE77884)/Homer	GRAASTGAAAST	1	-1.625	0.3654	145	3.6	1846.8	3.35	1.07463	IRF8
bHLHE41(bHLH)/proB-Bhlhe41-ChIP-Seq(GSE93764)/Homer	KCACGTGMCN	1	-1.613	0.3667	343	8.53	4490.7	8.15	1.04663	bHLHE41
Tgif2(Homeobox)/mES-Tgif2-ChIP-Seq(GSE55404)/Homer	TGTCANYT	1	-1.603	0.3688	1688	41.96	22750.5	41.3	1.01598	Tgif2
Hoxa10(Homeobox)/ChickenMSG-Hoxa10.Flag-ChIP-Seq(GSE86088)/Homer	GGYAATGAAA	1	-1.597	0.3693	290	7.21	3783	6.87	1.04949	Hoxa10
E2F1(E2F)/Hela-E2F1-ChIP-Seq(GSE22478)/Homer	CWGGCGGGAA	1	-1.568	0.3785	33	0.82	387.8	0.7	1.17143	E2F1
RBPJ:Ebox(?,bHLH)/Panc1-Rbpj1-ChIP-Seq(GSE47459)/Homer	GGGRAARRGRMCAGMTG	1	-1.54	0.3876	131	3.26	1670.3	3.03	1.07591	RBPJ:Ebox
Otx2(Homeobox)/EpiLC-Otx2-ChIP-Seq(GSE56098)/Homer	NYTAATCCYB	1	-1.499	0.4021	337	8.38	4429.9	8.04	1.04229	Otx2
Unknown-ESC-element(?)/mES-Nanog-ChIP-Seq(GSE11724)/Homer	CACAGCAGGGGG	1	-1.497	0.4021	290	7.21	3798.7	6.9	1.04493	Unknown-ESC-element
GATA(Zf),IR4/iTreg-Gata3-ChIP-Seq(GSE20898)/Homer	NAGATWNBNATCTNN	1	-1.488	0.403	34	0.85	404.2	0.73	1.16438	GATA
IRF4(IRF)/GM12878-IRF4-ChIP-Seq(GSE32465)/Homer	ACTGAAACCA	1	-1.485	0.403	198	4.92	2568.3	4.66	1.05579	IRF4
EBF(EBF)/proBcell-EBF-ChIP-Seq(GSE21978)/Homer	DGTCCCYRGGGA	1	-1.479	0.403	80	1.99	1003.3	1.82	1.09341	EBF
Nr5a2(NR)/Pancreas-LRH1-ChIP-Seq(GSE34295)/Homer	BTCAAGGTCA	1	-1.457	0.4103	284	7.06	3724.2	6.76	1.04438	Nr5a2
RAR:RXR(NR),DR5/ES-RAR-ChIP-Seq(GSE56893)/Homer	RGGTCADNNAGAGGTCAV	1	-1.449	0.4118	14	0.35	153.6	0.28	1.25	RAR:RXR
ZNF143|STAF(Zf)/CUTLL-ZNF143-ChIP-Seq(GSE29600)/Homer	ATTTCCCAGVAKSCY	1	-1.419	0.4225	126	3.13	1617.3	2.94	1.06463	ZNF143|STAF
RORa(NR)/Liver-Rora-ChIP-Seq(GSE101115)/Homer	AAWCTAGGTCARDNN	1	-1.396	0.4306	65	1.62	813.9	1.48	1.09459	RORa
VDR(NR),DR3/GM10855-VDR+vitD-ChIP-Seq(GSE22484)/Homer	ARAGGTCANWGAGTTCANNN	1	-1.346	0.4508	85	2.11	1081	1.96	1.07653	VDR
HIF-1b(HLH)/T47D-HIF1b-ChIP-Seq(GSE59937)/Homer	RTACGTGC	1	-1.342	0.4508	300	7.46	3959	7.19	1.03755	HIF-1b
Tcf7(HMG)/GM12878-TCF7-ChIP-Seq(Encode)/Homer	CTTTGATGTGSB	1	-1.327	0.4559	133	3.31	1721	3.12	1.0609	Tcf7
SF1(NR)/H295R-Nr5a1-ChIP-Seq(GSE44220)/Homer	CAAGGHCANV	1	-1.326	0.4559	179	4.45	2337	4.24	1.04953	SF1
Elf4(ETS)/BMDM-Elf4-ChIP-Seq(GSE88699)/Homer	ACTTCCKGKT	1	-1.291	0.4685	405	10.07	5386.5	9.78	1.02965	Elf4
E2F3(E2F)/MEF-E2F3-ChIP-Seq(GSE71376)/Homer	BTKGGCGGGAAA	1	-1.276	0.4738	115	2.86	1487.7	2.7	1.05926	E2F3
Hoxd10(Homeobox)/ChickenMSG-Hoxd10.Flag-ChIP-Seq(GSE86088)/Homer	GGCMATGAAA	1	-1.261	0.479	549	13.65	7343.3	13.33	1.02401	Hoxd10
MafF(bZIP)/HepG2-MafF-ChIP-Seq(GSE31477)/Homer	HWWGTCAGCAWWTTT	1	-1.261	0.479	138	3.43	1796	3.26	1.05215	MafF
SPDEF(ETS)/VCaP-SPDEF-ChIP-Seq(SRA014231)/Homer	ASWTCCTGBT	1	-1.257	0.479	427	10.61	5691.9	10.33	1.02711	SPDEF
p53(p53)/Saos-p53-ChIP-Seq(GSE15780)/Homer	RRCATGYCYRGRCATGYYYN	1	-1.231	0.4855	44	1.09	550.2	1	1.09	p53
p53(p53)/Saos-p53-ChIP-Seq/Homer	RRCATGYCYRGRCATGYYYN	1	-1.231	0.4855	44	1.09	550.2	1	1.09	p53
ZNF652/HepG2-ZNF652.Flag-ChIP-Seq(Encode)/Homer	TTAACCCTTTVNKKN	1	-1.187	0.5055	97	2.41	1257.3	2.28	1.05702	ZNF652/HepG2-ZNF652.Flag-ChIP-Seq
PRDM14(Zf)/H1-PRDM14-ChIP-Seq(GSE22767)/Homer	RGGTCTCTAACY	1	-1.177	0.5084	113	2.81	1472.5	2.67	1.05243	PRDM14
CLOCK(bHLH)/Liver-Clock-ChIP-Seq(GSE39860)/Homer	GHCACGTG	1	-1.124	0.534	183	4.55	2420.9	4.39	1.03645	CLOCK
Hoxd12(Homeobox)/ChickenMSG-Hoxd12.Flag-ChIP-Seq(GSE86088)/Homer	HDGYAATGAAAN	1	-1.115	0.5368	849	21.1	11463	20.81	1.01394	Hoxd12
PSE(SNAPc)/K562-mStart-Seq/Homer	WAVTCACCMTAASYDAAAAG	1	-1.088	0.5494	219	5.44	2912.3	5.29	1.02836	PSE
OCT4-SOX2-TCF-NANOG(POU,Homeobox,HMG)/mES-Oct4-ChIP-Seq(GSE11431)/Homer	ATTTGCATAACAATG	1	-1.067	0.5587	64	1.59	829.5	1.51	1.05298	OCT4-SOX2-TCF-NANOG
PU.1(ETS)/ThioMac-PU.1-ChIP-Seq(GSE21512)/Homer	AGAGGAAGTG	1	-1.009	0.5897	209	5.2	2791.9	5.07	1.02564	PU.1
CEBP:AP1(bZIP)/ThioMac-CEBPb-ChIP-Seq(GSE21512)/Homer	DRTGTTGCAA	1	-1.007	0.5897	367	9.12	4935.1	8.96	1.01786	CEBP:AP1
Brn2(POU,Homeobox)/NPC-Brn2-ChIP-Seq(GSE35496)/Homer	ATGAATATTC	1	-1.001	0.5899	44	1.09	568	1.03	1.05825	Brn2
AMYB(HTH)/Testes-AMYB-ChIP-Seq(GSE44588)/Homer	TGGCAGTTGG	1	-0.9988	0.5899	643	15.98	8693.8	15.78	1.01267	AMYB
Nkx3.1(Homeobox)/LNCaP-Nkx3.1-ChIP-Seq(GSE28264)/Homer	AAGCACTTAA	1	-0.985	0.5946	1069	26.57	14509.9	26.34	1.00873	Nkx3.1
Elk1(ETS)/Hela-Elk1-ChIP-Seq(GSE31477)/Homer	HACTTCCGGY	1	-0.9681	0.6025	153	3.8	2040.8	3.7	1.02703	Elk1
EBF2(EBF)/BrownAdipose-EBF2-ChIP-Seq(GSE97114)/Homer	NABTCCCWDGGGAVH	1	-0.9561	0.6074	368	9.15	4962	9.01	1.01554	EBF2
CRX(Homeobox)/Retina-Crx-ChIP-Seq(GSE20012)/Homer	GCTAATCC	1	-0.9313	0.6203	1065	26.47	14475.3	26.28	1.00723	CRX
ETS(ETS)/Promoter/Homer	AACCGGAAGT	1	-0.9288	0.6203	96	2.39	1275.5	2.32	1.03017	ETS
ZNF264(Zf)/HEK293-ZNF264.GFP-ChIP-Seq(GSE58341)/Homer	RGGGCACTAACY	1	-0.9111	0.6282	257	6.39	3462	6.28	1.01752	ZNF264
Barx1(Homeobox)/Stomach-Barx1.3xFlag-ChIP-Seq(GSE69483)/Homer	AAACMATTAN	1	-0.899	0.6334	214	5.32	2880.9	5.23	1.01721	Barx1
Elk4(ETS)/Hela-Elk4-ChIP-Seq(GSE31477)/Homer	NRYTTCCGGY	1	-0.8614	0.6552	146	3.63	1963.1	3.56	1.01966	Elk4
PRDM10(Zf)/HEK293-PRDM10.eGFP-ChIP-Seq(Encode)/Homer	TGGTACATTCCA	1	-0.8208	0.6798	283	7.03	3837.3	6.97	1.00861	PRDM10
Oct4(POU,Homeobox)/mES-Oct4-ChIP-Seq(GSE11431)/Homer	ATTTGCATAW	1	-0.812	0.6833	177	4.4	2394.5	4.35	1.01149	2020-10-04
PRDM1(Zf)/Hela-PRDM1-ChIP-Seq(GSE31477)/Homer	ACTTTCACTTTC	1	-0.7751	0.7064	241	5.99	3275	5.94	1.00842	PRDM1
E2F7(E2F)/Hela-E2F7-ChIP-Seq(GSE32673)/Homer	VDTTTCCCGCCA	1	-0.7705	0.707	15	0.37	196.2	0.36	1.02778	E2F7
Tcf21(bHLH)/ArterySmoothMuscle-Tcf21-ChIP-Seq(GSE61369)/Homer	NAACAGCTGG	1	-0.7548	0.7156	415	10.32	5658.9	10.27	1.00487	Tcf21
Max(bHLH)/K562-Max-ChIP-Seq(GSE31477)/Homer	RCCACGTGGYYN	1	-0.7529	0.7156	242	6.02	3294.2	5.98	1.00669	Max
ETS:RUNX(ETS,Runt)/Jurkat-RUNX1-ChIP-Seq(GSE17954)/Homer	RCAGGATGTGGT	1	-0.7491	0.7156	33	0.82	442.9	0.8	1.025	ETS:RUNX
Twist(bHLH)/HMLE-TWIST1-ChIP-Seq(Chang_et_al)/Homer	VCAKCTGGNNNCCAGMTGBN	1	-0.7327	0.7236	54	1.34	730.6	1.33	1.00752	Twist
Zic3(Zf)/mES-Zic3-ChIP-Seq(GSE37889)/Homer	GGCCYCCTGCTGDGH	1	-0.7009	0.7442	242	6.02	3308	6	1.00333	Zic3
Sp1(Zf)/Promoter/Homer	GGCCCCGCCCCC	1	-0.6951	0.7459	43	1.07	584.1	1.06	1.00943	Sp1
Nr5a2(NR)/mES-Nr5a2-ChIP-Seq(GSE19019)/Homer	BTCAAGGTCA	1	-0.6895	0.7473	196	4.87	2680.8	4.87	1	Nr5a2
ZNF382(Zf)/HEK293-ZNF382.GFP-ChIP-Seq(GSE58341)/Homer	GNCTGTASTRNTGBCTCHTT	1	-0.6725	0.7574	8	0.2	107	0.19	1.05263	ZNF382
BMAL1(bHLH)/Liver-Bmal1-ChIP-Seq(GSE39860)/Homer	GNCACGTG	1	-0.6613	0.7632	798	19.84	10936.5	19.85	0.999496	BMAL1
GATA3(Zf),DR4/iTreg-Gata3-ChIP-Seq(GSE20898)/Homer	AGATGKDGAGATAAG	1	-0.6611	0.7632	31	0.77	423.1	0.77	1	GATA3
MyoG(bHLH)/C2C12-MyoG-ChIP-Seq(GSE36024)/Homer	AACAGCTG	1	-0.6564	0.7632	463	11.51	6348.1	11.52	0.999132	MyoG
FOXA1:AR(Forkhead,NR)/LNCAP-AR-ChIP-Seq(GSE27824)/Homer	AGTAAACAAAAAAGAACAND	1	-0.6524	0.7632	22	0.55	300.7	0.55	1	FOXA1:AR
NFAT(RHD)/Jurkat-NFATC1-ChIP-Seq(Jolma_et_al.)/Homer	ATTTTCCATT	1	-0.6448	0.7649	388	9.64	5324.9	9.67	0.996898	NFAT
Mouse_Recombination_Hotspot(Zf)/Testis-DMC1-ChIP-Seq(GSE24438)/Homer	ACTYKNATTCGTGNTACTTC	1	-0.6247	0.7778	24	0.6	330.8	0.6	1	Mouse_Recombination_Hotspot
c-Myc(bHLH)/mES-cMyc-ChIP-Seq(GSE11431)/Homer	VVCCACGTGG	1	-0.6177	0.7805	179	4.45	2464.1	4.47	0.995526	c-Myc
CEBP(bZIP)/ThioMac-CEBPb-ChIP-Seq(GSE21512)/Homer	ATTGCGCAAC	1	-0.6153	0.7805	294	7.31	4044.9	7.34	0.995913	CEBP
T1ISRE(IRF)/ThioMac-Ifnb-Expression/Homer	ACTTTCGTTTCT	1	-0.6145	0.7805	4	0.1	54	0.1	1	T1ISRE
ZNF41(Zf)/HEK293-ZNF41.GFP-ChIP-Seq(GSE58341)/Homer	CCTCATGGTGYCYTWYTCCCTTGTG	1	-0.6133	0.7805	8	0.2	109.5	0.2	1	ZNF41
GATA3(Zf),DR8/iTreg-Gata3-ChIP-Seq(GSE20898)/Homer	AGATSTNDNNDSAGATAASN	1	-0.6069	0.7805	28	0.7	387.5	0.7	1	GATA3
Phox2b(Homeobox)/CLBGA-PHOX2B-ChIP-Seq(GSE90683)/Homer	TTAATTNAATTA	1	-0.5828	0.7943	68	1.69	943.2	1.71	0.988304	Phox2b
RARg(NR)/ES-RARg-ChIP-Seq(GSE30538)/Homer	AGGTCAAGGTCA	1	-0.5775	0.7958	9	0.22	125.8	0.23	0.956522	RARg
Bapx1(Homeobox)/VertebralCol-Bapx1-ChIP-Seq(GSE36672)/Homer	TTRAGTGSYK	1	-0.5685	0.8003	1023	25.43	14066.5	25.53	0.996083	Bapx1
TCFL2(HMG)/K562-TCF7L2-ChIP-Seq(GSE29196)/Homer	ACWTCAAAGG	1	-0.5498	0.8126	27	0.67	379	0.69	0.971014	TCFL2
Gfi1b(Zf)/HPC7-Gfi1b-ChIP-Seq(GSE22178)/Homer	MAATCACTGC	1	-0.5259	0.8294	308	7.66	4266.1	7.74	0.989664	Gfi1b
NFkB-p50,p52(RHD)/Monocyte-p50-ChIP-Chip(Schreiber_et_al.)/Homer	GGGGGAATCCCC	1	-0.5221	0.8298	26	0.65	368.4	0.67	0.970149	NFkB-p50,p52
Phox2a(Homeobox)/Neuron-Phox2a-ChIP-Seq(GSE31456)/Homer	YTAATYNRATTA	1	-0.4896	0.8543	142	3.53	1986.1	3.61	0.977839	Phox2a
E2F6(E2F)/Hela-E2F6-ChIP-Seq(GSE31477)/Homer	GGCGGGAARN	1	-0.4847	0.8556	89	2.21	1252.6	2.27	0.973568	E2F6
CEBP:CEBP(bZIP)/MEF-Chop-ChIP-Seq(GSE35681)/Homer	NTNATGCAAYMNNHTGMAAY	1	-0.4798	0.857	63	1.57	891.3	1.62	0.969136	CEBP:CEBP
NFY(CCAAT)/Promoter/Homer	RGCCAATSRG	1	-0.4771	0.857	332	8.25	4615.7	8.38	0.984487	NFY
Six2(Homeobox)/NephronProgenitor-Six2-ChIP-Seq(GSE39837)/Homer	GWAAYHTGAKMC	1	-0.477	0.857	407	10.12	5649.3	10.25	0.987317	Six2
Myf5(bHLH)/GM-Myf5-ChIP-Seq(GSE24852)/Homer	BAACAGCTGT	1	-0.4705	0.857	295	7.33	4107.5	7.46	0.982574	Myf5
Brachyury(T-box)/Mesoendoderm-Brachyury-ChIP-exo(GSE54963)/Homer	ANTTMRCASBNNNGTGYKAAN	1	-0.4591	0.8634	107	2.66	1508.9	2.74	0.970803	Brachyury
ZNF692(Zf)/HEK293-ZNF692.GFP-ChIP-Seq(GSE58341)/Homer	GTGGGCCCCA	1	-0.4493	0.869	40	0.99	574.8	1.04	0.951923	ZNF692
NPAS2(bHLH)/Liver-NPAS2-ChIP-Seq(GSE39860)/Homer	KCCACGTGAC	1	-0.4422	0.8723	438	10.89	6092.9	11.06	0.984629	NPAS2
Prop1(Homeobox)/GHFT1-PROP1.biotin-ChIP-Seq(GSE77302)/Homer	NTAATBNAATTA	1	-0.4332	0.8773	237	5.89	3319	6.02	0.978405	Prop1
ZFP3(Zf)/HEK293-ZFP3.GFP-ChIP-Seq(GSE58341)/Homer	GGGTTTTGAAGGATGARTAGGAGTT	1	-0.4143	0.8911	2	0.05	31.8	0.06	0.833333	ZFP3
MYNN(Zf)/HEK293-MYNN.eGFP-ChIP-Seq(Encode)/Homer	TTCAAAWTAAAAGTC	1	-0.4131	0.8911	85	2.11	1213	2.2	0.959091	MYNN
PBX1(Homeobox)/MCF7-PBX1-ChIP-Seq(GSE28007)/Homer	GSCTGTCACTCA	1	-0.4019	0.8964	32	0.8	468.1	0.85	0.941176	PBX1
ZSCAN22(Zf)/HEK293-ZSCAN22.GFP-ChIP-Seq(GSE58341)/Homer	SMCAGTCWGAKGGAGGAGGC	1	-0.3987	0.8964	20	0.5	297.5	0.54	0.925926	ZSCAN22
EBNA1(EBV-virus)/Raji-EBNA1-ChIP-Seq(GSE30709)/Homer	GGYAGCAYDTGCTDCCCNNN	1	-0.3853	0.9055	3	0.07	48.1	0.09	0.777778	EBNA1
GSC(Homeobox)/FrogEmbryos-GSC-ChIP-Seq(DRA000576)/Homer	RGGATTAR	1	-0.3781	0.9092	534	13.27	7450.8	13.52	0.981509	GSC
Atoh1(bHLH)/Cerebellum-Atoh1-ChIP-Seq(GSE22111)/Homer	VNRVCAGCTGGY	1	-0.3676	0.9159	464	11.53	6489.1	11.78	0.978778	Atoh1
ZNF16(Zf)/HEK293-ZNF16.GFP-ChIP-Seq(GSE58341)/Homer	MACCTTCYATGGCTCCCTAKTGCCY	1	-0.366	0.9159	3	0.07	49.6	0.09	0.777778	ZNF16
E2F4(E2F)/K562-E2F4-ChIP-Seq(GSE31477)/Homer	GGCGGGAAAH	1	-0.3646	0.9159	64	1.59	928.6	1.69	0.940828	E2F4
MyoD(bHLH)/Myotube-MyoD-ChIP-Seq(GSE21614)/Homer	RRCAGCTGYTSY	1	-0.3585	0.9159	315	7.83	4432	8.05	0.972671	MyoD
PRDM15(Zf)/ESC-Prdm15-ChIP-Seq(GSE73694)/Homer	YCCDNTCCAGGTTTT	1	-0.357	0.9159	377	9.37	5291.9	9.61	0.975026	PRDM15
Tgif1(Homeobox)/mES-Tgif1-ChIP-Seq(GSE55404)/Homer	YTGWCADY	1	-0.336	0.9304	1498	37.24	20745.8	37.66	0.988848	Tgif1
PU.1-IRF(ETS:IRF)/Bcell-PU.1-ChIP-Seq(GSE21512)/Homer	MGGAAGTGAAAC	1	-0.3241	0.9386	562	13.97	7870.8	14.29	0.977607	PU.1-IRF
ZNF675(Zf)/HEK293-ZNF675.GFP-ChIP-Seq(GSE58341)/Homer	ARGAGGMCAAAATGW	1	-0.3224	0.9386	55	1.37	810.5	1.47	0.931973	ZNF675
GFY(?)/Promoter/Homer	ACTACAATTCCC	1	-0.3207	0.9386	25	0.62	380.6	0.69	0.898551	GFY
ZBTB18(Zf)/HEK293-ZBTB18.GFP-ChIP-Seq(GSE58341)/Homer	AACATCTGGA	1	-0.3077	0.9452	202	5.02	2882.2	5.23	0.959847	ZBTB18
Oct6(POU,Homeobox)/NPC-Pou3f1-ChIP-Seq(GSE35496)/Homer	WATGCAAATGAG	1	-0.3007	0.9489	152	3.78	2185.2	3.97	0.952141	2020-10-06
Pax7(Paired,Homeobox),long/Myoblast-Pax7-ChIP-Seq(GSE25064)/Homer	TAATCHGATTAC	1	-0.2997	0.9489	7	0.17	116.3	0.21	0.809524	Pax7
Tcfcp2l1(CP2)/mES-Tcfcp2l1-ChIP-Seq(GSE11431)/Homer	NRAACCRGTTYRAACCRGYT	1	-0.2744	0.9682	50	1.24	750.1	1.36	0.911765	Tcfcp2l1
Pit1(Homeobox)/GCrat-Pit1-ChIP-Seq(GSE58009)/Homer	ATGMATATDC	1	-0.2712	0.9683	435	10.81	6146.4	11.16	0.968638	Pit1
MYB(HTH)/ERMYB-Myb-ChIPSeq(GSE22095)/Homer	GGCVGTTR	1	-0.2703	0.9683	691	17.18	9693.3	17.6	0.976136	MYB
SpiB(ETS)/OCILY3-SPIB-ChIP-Seq(GSE56857)/Homer	AAAGRGGAAGTG	1	-0.2613	0.9719	86	2.14	1268.2	2.3	0.930435	SpiB
Znf263(Zf)/K562-Znf263-ChIP-Seq(GSE31477)/Homer	CVGTSCTCCC	1	-0.2589	0.9719	700	17.4	9827.8	17.84	0.975336	Znf263
Pax7(Paired,Homeobox),longest/Myoblast-Pax7-ChIP-Seq(GSE25064)/Homer	NTAATTDGCYAATTANNWWD	1	-0.2527	0.9744	6	0.15	105.5	0.19	0.789474	Pax7
Tcf3(HMG)/mES-Tcf3-ChIP-Seq(GSE11724)/Homer	ASWTCAAAGG	1	-0.2503	0.9744	96	2.39	1414.8	2.57	0.929961	Tcf3
DUX(Homeobox)/C2C12-Dux-ChIP-Seq(GSE87279)/Homer	BCWGATTCAATCAAN	1	-0.243	0.978	1	0.02	21.4	0.04	0.5	DUX
THRa(NR)/C17.2-THRa-ChIP-Seq(GSE38347)/Homer	GGTCANYTGAGGWCA	1	-0.2384	0.9795	167	4.15	2423.4	4.4	0.943182	THRa
Tbet(T-box)/CD8-Tbet-ChIP-Seq(GSE33802)/Homer	AGGTGTGAAM	1	-0.2366	0.9795	510	12.68	7213.3	13.09	0.968678	Tbet
ZKSCAN1(Zf)/HepG2-ZKSCAN1-ChIP-Seq(Encode)/Homer	GCACAYAGTAGGKCY	1	-0.2074	1	9	0.22	158.3	0.29	0.758621	ZKSCAN1
AR-halfsite(NR)/LNCaP-AR-ChIP-Seq(GSE27824)/Homer	CCAGGAACAG	1	-0.1966	1	1639	40.74	22831.7	41.44	0.983108	AR-halfsite
Pknox1(Homeobox)/ES-Prep1-ChIP-Seq(GSE63282)/Homer	SCTGTCAVTCAV	1	-0.1879	1	89	2.21	1339.4	2.43	0.909465	Pknox1
GRHL2(CP2)/HBE-GRHL2-ChIP-Seq(GSE46194)/Homer	AAACYKGTTWDACMRGTTTB	1	-0.1756	1	136	3.38	2017.6	3.66	0.923497	GRHL2
NeuroG2(bHLH)/Fibroblast-NeuroG2-ChIP-Seq(GSE75910)/Homer	ACCATCTGTT	1	-0.1718	1	661	16.43	9372.3	17.01	0.965902	NeuroG2
GRE(NR),IR3/RAW264.7-GRE-ChIP-Seq(Unpublished)/Homer	VAGRACAKWCTGTYC	1	-0.171	1	80	1.99	1217.6	2.21	0.900452	GRE
Oct2(POU,Homeobox)/Bcell-Oct2-ChIP-Seq(GSE21512)/Homer	ATATGCAAAT	1	-0.1704	1	94	2.34	1419.2	2.58	0.906977	2020-10-02
Hnf1(Homeobox)/Liver-Foxa2-Chip-Seq(GSE25694)/Homer	GGTTAAWCATTAA	1	-0.1642	1	36	0.89	577.8	1.05	0.847619	Hnf1
ZNF528(Zf)/HEK293-ZNF528.GFP-ChIP-Seq(GSE58341)/Homer	AGAAATGACTTCCCT	1	-0.1642	1	2	0.05	46.6	0.08	0.625	ZNF528
OCT:OCT(POU,Homeobox)/NPC-Brn1-ChIP-Seq(GSE35496)/Homer	ATGAATATTCATGAG	1	-0.1498	1	1	0.02	28	0.05	0.4	OCT:OCT
Srebp2(bHLH)/HepG2-Srebp2-ChIP-Seq(GSE31477)/Homer	CGGTCACSCCAC	1	-0.1433	1	50	1.24	792.9	1.44	0.861111	Srebp2
Brn1(POU,Homeobox)/NPC-Brn1-ChIP-Seq(GSE35496)/Homer	TATGCWAATBAV	1	-0.1361	1	102	2.54	1553.3	2.82	0.900709	Brn1
Tbox:Smad(T-box,MAD)/ESCd5-Smad2_3-ChIP-Seq(GSE29422)/Homer	AGGTGHCAGACA	1	-0.1354	1	75	1.86	1162.4	2.11	0.881517	Tbox:Smad
E-box(bHLH)/Promoter/Homer	SSGGTCACGTGA	1	-0.1347	1	14	0.35	251.3	0.46	0.76087	E-box
ZNF7(Zf)/HepG2-ZNF7.Flag-ChIP-Seq(Encode)/Homer	CTGCCWVCTTTTRTA	1	-0.1341	1	211	5.24	3112.7	5.65	0.927434	ZNF7
n-Myc(bHLH)/mES-nMyc-ChIP-Seq(GSE11431)/Homer	VRCCACGTGG	1	-0.1272	1	216	5.37	3189.5	5.79	0.927461	n-Myc
GLI3(Zf)/Limb-GLI3-ChIP-Chip(GSE11077)/Homer	CGTGGGTGGTCC	1	-0.124	1	29	0.72	486.6	0.88	0.818182	GLI3
Tbx5(T-box)/HL1-Tbx5.biotin-ChIP-Seq(GSE21529)/Homer	AGGTGTCA	1	-0.1236	1	1512	37.58	21202.2	38.49	0.976357	Tbx5
CHR(?)/Hela-CellCycle-Expression/Homer	SRGTTTCAAA	1	-0.1219	1	232	5.77	3421.2	6.21	0.929147	CHR
CArG(MADS)/PUER-Srf-ChIP-Seq(Sullivan_et_al.)/Homer	CCATATATGGNM	1	-0.1212	1	105	2.61	1606.2	2.92	0.893836	CArG
Tcf12(bHLH)/GM12878-Tcf12-ChIP-Seq(GSE32465)/Homer	VCAGCTGYTG	1	-0.118	1	408	10.14	5907.4	10.72	0.945896	Tcf12
RAR:RXR(NR),DR5/ES-RAR-ChIP-Seq(GSE56893)/Homer	AGGTCAAGGTCA	1	-0.1098	1	36	0.89	598.2	1.09	0.816514	RAR:RXR
ZNF165(Zf)/WHIM12-ZNF165-ChIP-Seq(GSE65937)/Homer	AAGGKGRCGCAGGCA	1	-0.1096	1	30	0.75	507.4	0.92	0.815217	ZNF165
HRE(HSF)/HepG2-HSF1-ChIP-Seq(GSE31477)/Homer	BSTTCTRGAABVTTCYAGAA	1	-0.1062	1	39	0.97	645	1.17	0.82906	HRE
c-Myc(bHLH)/LNCAP-cMyc-ChIP-Seq(Unpublished)/Homer	VCCACGTG	1	-0.089	1	80	1.99	1265.3	2.3	0.865217	c-Myc
ZBTB12(Zf)/HEK293-ZBTB12.GFP-ChIP-Seq(GSE58341)/Homer	NGNTCTAGAACCNGV	1	-0.08733	1	125	3.11	1923.7	3.49	0.891117	ZBTB12
bHLHE40(bHLH)/HepG2-BHLHE40-ChIP-Seq(GSE31477)/Homer	KCACGTGMCN	1	-0.07793	1	64	1.59	1037.4	1.88	0.845745	bHLHE40
MNT(bHLH)/HepG2-MNT-ChIP-Seq(Encode)/Homer	DGCACACGTG	1	-0.07129	1	399	9.92	5852.1	10.62	0.934087	MNT
NPAS(bHLH)/Liver-NPAS-ChIP-Seq(GSE39860)/Homer	NVCACGTG	1	-0.0699	1	648	16.11	9352.8	16.98	0.948763	NPAS
PR(NR)/T47D-PR-ChIP-Seq(GSE31130)/Homer	VAGRACAKNCTGTBC	1	-0.06389	1	935	23.24	13368.2	24.27	0.957561	PR
NeuroD1(bHLH)/Islet-NeuroD1-ChIP-Seq(GSE30298)/Homer	GCCATCTGTT	1	-0.06101	1	350	8.7	5179.2	9.4	0.925532	NeuroD1
GFX(?)/Promoter/Homer	ATTCTCGCGAGA	1	-0.05964	1	1	0.02	39.2	0.07	0.285714	GFX
OCT:OCT(POU,Homeobox,IR1)/NPC-Brn2-ChIP-Seq(GSE35496)/Homer	ATGAATWATTCATGA	1	-0.04906	1	4	0.1	107.8	0.2	0.5	OCT:OCT
ZEB2(Zf)/SNU398-ZEB2-ChIP-Seq(GSE103048)/Homer	GNMCAGGTGTGC	1	-0.04584	1	355	8.82	5285.4	9.59	0.919708	ZEB2
SCRT1(Zf)/HEK293-SCRT1.eGFP-ChIP-Seq(Encode)/Homer	GCAACAGGTG	1	-0.04466	1	101	2.51	1623.1	2.95	0.850847	SCRT1
Ascl1(bHLH)/NeuralTubes-Ascl1-ChIP-Seq(GSE55840)/Homer	NNVVCAGCTGBN	1	-0.03967	1	634	15.76	9244.5	16.78	0.939213	Ascl1
Pax7(Paired,Homeobox)/Myoblast-Pax7-ChIP-Seq(GSE25064)/Homer	TAATCAATTA	1	-0.03909	1	24	0.6	456.4	0.83	0.722892	Pax7
BMYB(HTH)/Hela-BMYB-ChIP-Seq(GSE27030)/Homer	NHAACBGYYV	1	-0.0379	1	574	14.27	8407.9	15.26	0.935125	BMYB
GLIS3(Zf)/Thyroid-Glis3.GFP-ChIP-Seq(GSE103297)/Homer	CTCCCTGGGAGGCCN	1	-0.03344	1	530	13.17	7804.9	14.17	0.929428	GLIS3
GRE(NR),IR3/A549-GR-ChIP-Seq(GSE32465)/Homer	NRGVACABNVTGTYCY	1	-0.03263	1	34	0.85	623.7	1.13	0.752212	GRE
Meis1(Homeobox)/MastCells-Meis1-ChIP-Seq(GSE48085)/Homer	VGCTGWCAVB	1	-0.0277	1	747	18.57	10883.1	19.76	0.939777	Meis1
Pitx1:Ebox(Homeobox,bHLH)/Hindlimb-Pitx1-ChIP-Seq(GSE41591)/Homer	YTAATTRAWWCCAGATGT	1	-0.02438	1	63	1.57	1088.6	1.98	0.792929	Pitx1:Ebox
Pbx3(Homeobox)/GM12878-PBX3-ChIP-Seq(GSE32465)/Homer	SCTGTCAMTCAN	1	-0.02128	1	86	2.14	1446.9	2.63	0.813688	Pbx3
Nkx2.5(Homeobox)/HL1-Nkx2.5.biotin-ChIP-Seq(GSE21529)/Homer	RRSCACTYAA	1	-0.01942	1	987	24.53	14293.5	25.95	0.945279	Nkx2.5
Eomes(T-box)/H9-Eomes-ChIP-Seq(GSE26097)/Homer	ATTAACACCT	1	-0.01898	1	955	23.74	13850.2	25.14	0.944312	Eomes
TCF4(bHLH)/SHSY5Y-TCF4-ChIP-Seq(GSE96915)/Homer	SMCATCTGKH	1	-0.01702	1	643	15.98	9489.9	17.23	0.927452	TCF4
Ronin(THAP)/ES-Thap11-ChIP-Seq(GSE51522)/Homer	RACTACAACTCCCAGVAKGC	1	-0.009235	1	4	0.1	139.6	0.25	0.4	Ronin
Ptf1a(bHLH)/Panc1-Ptf1a-ChIP-Seq(GSE47459)/Homer	ACAGCTGTTN	1	-0.00804	1	1132	28.14	16447.7	29.86	0.942398	Ptf1a
ZNF189(Zf)/HEK293-ZNF189.GFP-ChIP-Seq(GSE58341)/Homer	TGGAACAGMA	1	-0.007748	1	294	7.31	4591.9	8.34	0.876499	ZNF189
Zac1(Zf)/Neuro2A-Plagl1-ChIP-Seq(GSE75942)/Homer	HAWGRGGCCM	1	-0.007412	1	1007	25.03	14714.6	26.71	0.937102	Zac1
CTCF-SatelliteElement(Zf?)/CD4+-CTCF-ChIP-Seq(Barski_et_al.)/Homer	TGCAGTTCCMVNWRTGGCCA	1	-0.006921	1	6	0.15	187.7	0.34	0.441176	CTCF-SatelliteElement
PRDM9(Zf)/Testis-DMC1-ChIP-Seq(GSE35498)/Homer	ADGGYAGYAGCATCT	1	-0.005837	1	155	3.85	2566.4	4.66	0.82618	PRDM9
Tbx21(T-box)/GM12878-TBX21-ChIP-Seq(Encode)/Homer	AGGTGTGAAA	1	-0.005657	1	415	10.32	6370.9	11.56	0.892734	Tbx21
THRb(NR)/HepG2-THRb.Flag-ChIP-Seq(Encode)/Homer	GGTCACCTGAGGTCA	1	-0.003833	1	209	5.2	3400.5	6.17	0.842788	THRb
DUX4(Homeobox)/Myoblasts-DUX4.V5-ChIP-Seq(GSE75791)/Homer	NWTAAYCYAATCAWN	1	-0.003615	1	7	0.17	221.6	0.4	0.425	DUX4
GFY-Staf(?,Zf)/Promoter/Homer	RACTACAATTCCCAGAAKGC	1	-0.003281	1	7	0.17	223.4	0.41	0.414634	GFY-Staf
Tbx6(T-box)/ESC-Tbx6-ChIP-Seq(GSE93524)/Homer	DAGGTGTBAA	1	-0.002315	1	429	10.66	6657.5	12.08	0.88245	Tbx6
ARE(NR)/LNCAP-AR-ChIP-Seq(GSE27824)/Homer	RGRACASNSTGTYCYB	1	-0.00179	1	68	1.69	1290.3	2.34	0.722222	ARE
Olig2(bHLH)/Neuron-Olig2-ChIP-Seq(GSE30882)/Homer	RCCATMTGTT	1	-0.001586	1	803	19.96	12038.6	21.85	0.913501	Olig2
HINFP(Zf)/K562-HINFP.eGFP-ChIP-Seq(Encode)/Homer	TWVGGTCCGC	1	-0.000446	1	17	0.42	466.7	0.85	0.494118	HINFP
HEB(bHLH)/mES-Heb-ChIP-Seq(GSE53233)/Homer	VCAGCTGBNN	1	-0.000416	1	749	18.62	11412.7	20.72	0.898649	HEB
ZNF415(Zf)/HEK293-ZNF415.GFP-ChIP-Seq(GSE58341)/Homer	GRTGMTRGAGCC	1	-0.000415	1	165	4.1	2877.1	5.22	0.785441	ZNF415
NRF(NRF)/Promoter/Homer	STGCGCATGCGC	1	-0.000374	1	13	0.32	392	0.71	0.450704	NRF
E2A(bHLH)/proBcell-E2A-ChIP-Seq(GSE21978)/Homer	DNRCAGCTGY	1	-0.000368	1	558	13.87	8686.3	15.77	0.879518	E2A
CUX1(Homeobox)/K562-CUX1-ChIP-Seq(GSE92882)/Homer	TATCGATNAN	1	-0.00035	1	196	4.87	3360.1	6.1	0.798361	CUX1
E2A(bHLH),near_PU.1/Bcell-PU.1-ChIP-Seq(GSE21512)/Homer	NVCACCTGBN	1	-6e-05	1	554	13.77	8780.7	15.94	0.863864	E2A
YY1(Zf)/Promoter/Homer	CAAGATGGCGGC	1	-4.9e-05	1	6	0.15	280.7	0.51	0.294118	YY1
NRF1(NRF)/MCF7-NRF1-ChIP-Seq(Unpublished)/Homer	CTGCGCATGCGC	1	-4.5e-05	1	3	0.07	203.6	0.37	0.189189	NRF1
Nkx2.1(Homeobox)/LungAC-Nkx2.1-ChIP-Seq(GSE43252)/Homer	RSCACTYRAG	1	-3.1e-05	1	1202	29.88	18075.6	32.81	0.910698	Nkx2.1
Cux2(Homeobox)/Liver-Cux2-ChIP-Seq(GSE35985)/Homer	HNRAATCAAT	1	-2e-05	1	112	2.78	2190	3.98	0.698492	Cux2
OCT:OCT(POU,Homeobox)/NPC-OCT6-ChIP-Seq(GSE43916)/Homer	YATGCATATRCATRT	1	-1.2e-05	1	13	0.32	466.9	0.85	0.376471	OCT:OCT
HNF6(Homeobox)/Liver-Hnf6-ChIP-Seq(ERP000394)/Homer	NTATYGATCH	1	-5e-06	1	143	3.55	2747.7	4.99	0.711423	HNF6
ZEB1(Zf)/PDAC-ZEB1-ChIP-Seq(GSE64557)/Homer	VCAGGTRDRY	1	-1e-06	1	628	15.61	10209.1	18.53	0.842418	ZEB1
Nkx2.2(Homeobox)/NPC-Nkx2.2-ChIP-Seq(GSE61673)/Homer	BTBRAGTGSN	1	0	1	759	18.87	12430.6	22.56	0.836436	Nkx2.2
Slug(Zf)/Mesoderm-Snai2-ChIP-Seq(GSE61475)/Homer	SNGCACCTGCHS	1	0	1	142	3.53	3147.9	5.71	0.618214	Slug
LRF(Zf)/Erythroblasts-ZBTB7A-ChIP-Seq(GSE74977)/Homer	AAGACCCYYN	1	0	1	264	6.56	5553.5	10.08	0.650794	LRF
BORIS(Zf)/K562-CTCFL-ChIP-Seq(GSE32465)/Homer	CNNBRGCGCCCCCTGSTGGC	1	0	1	27	0.67	4219	7.66	0.0874674	BORIS
CTCF(Zf)/CD4+-CTCF-ChIP-Seq(Barski_et_al.)/Homer	AYAGTGCCMYCTRGTGGCCA	1	0	1	27	0.67	4429	8.04	0.0833333	CTCF
REST-NRSF(Zf)/Jurkat-NRSF-ChIP-Seq/Homer	GGMGCTGTCCATGGTGCTGA	1	0	1	0	0	26.7	0.05	0	REST-NRSF
ZBTB33(Zf)/GM12878-ZBTB33-ChIP-Seq(GSE32465)/Homer	GGVTCTCGCGAGAAC	1	0	1	0	0	68.1	0.12	0	ZBTB33
