# Supplementary material for: Re-expression of SMARCA4/BRG1 in small cell carcinoma of ovary, hypercalcemic type (SCCOHT) promotes an epithelial-like gene signature through an AP-1-dependent mechanism
Source: eLife. 2020 Dec 23;9:e59073. doi: 10.7554/eLife.59073 (PMC7813545; doi:10.7554/eLife.59073)
Supplement: Supplementary file 3. — A, Table of DESeq2 results for BIN67 pIND20-FLAG-A-FOS, -DOX Conditions (absent A-FOS), +/- BRG1used in volcano plot Figure 6. Log2Foldchange = BRG1/Control. B, Table of DESeq2 results for BIN67 pIND20-FLAG-A-FOS, Control transfected, +/- DOX (A-FOS) used in volcano plot Figure 6. Log2Foldchange = +DOX/-DOX. B, Table of DESeq2 results for BIN67 pIND20-FLAG-A-FOS, BRG1 transfected, +/- DOX (A-FOS) used in volcano plot Figure 6. Log2Foldchange = +DOX/-DOX. [file elife-59073-supp3.xlsx]

## Sheet: README
Supplmental Table 3. DESeq2 Results for RNA-seq data BIN67 +/- BRG1 +/- A-FOS
	Cell Line	Condition	Log2FoldChange
Sheet A:	BIN67 pIND20-FLAG-A-FOS	-DOX conditions (A-FOS absent)	BRG1 / Control
Sheet B	BIN67 pIND20-FLAG-A-FOS	Control Transfected	+DOX / -DOX (A-FOS)
Sheet C:	BIN67 pIND20-FLAG-A-FOS	BRG1 Transfected	+DOX / -DOX (A-FOS)

## Sheet: A. -DOX; BRG1 vs CTRL
baseMean	log2FoldChange	lfcSE	stat	pvalue	padj	Gene	Significance
861.398	-0.377781	0.325782	-1.15961	0.246206	0.870414	A1BG	N.S.
0.967816	-3.34809	4.83881	-0.691924	0.488985	NA	A1CF	N.S.
6.11232	3.09228	2.52244	1.22591	0.220234	0.845418	A2M	N.S.
30.3914	-0.314459	1.07162	-0.293442	0.769185	0.997809	A2ML1	N.S.
0.686298	2.95897	4.86575	0.608122	0.543107	NA	A3GALT2	N.S.
1782.21	-0.155542	0.237788	-0.654121	0.513034	0.973551	A4GALT	N.S.
0	NA	NA	NA	NA	NA	A4GNT	N.S.
2060.18	-0.117641	0.233899	-0.502957	0.614995	0.98635	AAAS	N.S.
3237.11	-0.380454	0.228207	-1.66714	0.0954859	0.608837	AACS	N.S.
0.228766	1.48804	4.9887	0.298281	0.765489	NA	AADAC	N.S.
0	NA	NA	NA	NA	NA	AADACL2	N.S.
0	NA	NA	NA	NA	NA	AADACL3	N.S.
4.08414	5.51523	3.43411	1.60601	0.108271	0.645951	AADACL4	N.S.
671.662	0.159311	0.286614	0.555839	0.578321	0.983572	AADAT	N.S.
1157.29	-0.325414	0.259992	-1.25163	0.210703	0.833151	AAED1	N.S.
3314.21	-0.0269019	0.21997	-0.122298	0.902663	0.997809	AAGAB	N.S.
4466.09	0.160659	0.327593	0.490421	0.623836	0.987197	AAK1	N.S.
587.244	0.136873	0.297915	0.459436	0.645921	0.987588	AAMDC	N.S.
5725.62	0.0857093	0.23179	0.369772	0.711553	0.994885	AAMP	N.S.
5.54838	0.657264	2.15822	0.30454	0.760717	0.997809	AANAT	N.S.
1566.84	-0.0313472	0.238597	-0.131381	0.895474	0.997809	AAR2	N.S.
2.78837	2.26873	3.15799	0.718409	0.472505	0.970096	AARD	N.S.
5673.71	0.522437	0.270574	1.93085	0.0535017	0.454735	AARS	N.S.
1280.64	0.0610003	0.244503	0.249487	0.802984	0.997809	AARS2	N.S.
1378.97	0.0582691	0.259001	0.224976	0.821998	0.997809	AARSD1	N.S.
579.906	-0.104562	0.297937	-0.350954	0.725623	0.994885	AASDH	N.S.
2955.36	-0.0887316	0.227083	-0.390746	0.695985	0.992567	AASDHPPT	N.S.
116.808	0.00123464	0.553053	0.0022324	0.998219	0.999967	AASS	N.S.
5876.4	0.215551	0.222227	0.969959	0.332067	0.926207	AATF	N.S.
1518.63	0.00588656	0.258851	0.0227411	0.981857	0.998628	AATK	N.S.
746.132	-0.0644309	0.272721	-0.236252	0.813237	0.997809	ABAT	N.S.
127.554	-0.590131	0.590378	-0.999582	0.317513	0.918663	ABC7-42404400C24.1	N.S.
64.7964	1.82591	0.854781	2.13612	0.0326696	0.340181	ABCA1	N.S.
0.244905	-1.36065	4.99533	-0.272386	0.785326	NA	ABCA10	N.S.
56.8648	9.31865	1.62624	5.73019	1.00318e-08	7.07699e-07	ABCA12	padj<0.05 & Upregulated
0.244905	-1.36065	4.99533	-0.272386	0.785326	NA	ABCA13	N.S.
8485.87	-0.520055	0.266974	-1.94796	0.0514193	0.44214	ABCA2	N.S.
14985.2	-0.235558	0.229871	-1.02474	0.305484	0.910704	ABCA3	N.S.
43.9403	8.94622	1.68363	5.31365	1.07448e-07	6.53961e-06	ABCA4	padj<0.05 & Upregulated
68.1906	2.09107	0.692443	3.01984	0.00252911	0.0507785	ABCA5	N.S.
0	NA	NA	NA	NA	NA	ABCA6	N.S.
2543.8	-0.343735	0.312445	-1.10014	0.271269	0.890564	ABCA7	N.S.
1.43485	2.35945	4.71423	0.500495	0.616727	NA	ABCA8	N.S.
0	NA	NA	NA	NA	NA	ABCA9	N.S.
9.3718	0.137118	1.97121	0.0695602	0.944544	0.997809	ABCB1	N.S.
3419.1	-0.363694	0.24445	-1.4878	0.136803	0.71537	ABCB10	N.S.
0	NA	NA	NA	NA	NA	ABCB11	N.S.
0.875172	3.28765	4.84936	0.677955	0.4978	NA	ABCB4	N.S.
1.14383	3.6913	4.83368	0.763662	0.445069	NA	ABCB5	N.S.
92.0757	1.17156	0.700829	1.67168	0.094587	0.606607	ABCB6	N.S.
950.918	-0.00556152	0.276329	-0.0201265	0.983942	0.998628	ABCB7	N.S.
1195.44	-0.028831	0.253365	-0.113792	0.909402	0.997809	ABCB8	N.S.
950.08	0.00557337	0.264645	0.0210598	0.983198	0.998628	ABCB9	N.S.
7042.67	0.386063	0.242084	1.59475	0.110768	0.651676	ABCC1	N.S.
2148.95	-0.0289876	0.23536	-0.123163	0.901978	0.997809	ABCC10	N.S.
31.6248	-0.272782	0.936888	-0.291158	0.770931	0.997809	ABCC11	N.S.
2.27046	-2.02424	3.50614	-0.577343	0.563708	0.981763	ABCC12	N.S.
13.9838	1.66582	1.65416	1.00704	0.313913	0.915712	ABCC2	N.S.
22.5474	7.98279	1.8428	4.33187	1.47846e-05	0.000565166	ABCC3	padj<0.05 & Upregulated
2537.04	0.214583	0.246859	0.869255	0.384707	0.943981	ABCC4	N.S.
4821.46	-0.0524152	0.21399	-0.244942	0.806501	0.997809	ABCC5	N.S.
17.1178	1.75731	1.23897	1.41837	0.156084	0.753815	ABCC6	N.S.
311.602	0.176059	0.357034	0.493117	0.62193	0.987052	ABCC8	N.S.
0	NA	NA	NA	NA	NA	ABCC9	N.S.
5204.54	-0.163231	0.212206	-0.769211	0.441768	0.959048	ABCD1	N.S.
989.926	-0.841046	0.281077	-2.99223	0.00276949	0.0542868	ABCD2	N.S.
3173.47	0.00946674	0.223473	0.0423619	0.96621	0.998406	ABCD3	N.S.
2008.63	0.182479	0.236512	0.771544	0.440384	0.958765	ABCD4	N.S.
5570.25	-0.222568	0.211696	-1.05136	0.293093	0.904069	ABCE1	N.S.
10880.4	0.040199	0.209907	0.191508	0.848127	0.997809	ABCF1	N.S.
5563.31	-0.0696659	0.219806	-0.316942	0.751288	0.997705	ABCF2	N.S.
4267.55	-0.0237526	0.219258	-0.108332	0.913732	0.997809	ABCF3	N.S.
41.264	2.77533	0.90641	3.06189	0.00219943	0.0453926	ABCG1	padj<0.05 & Upregulated
61.0045	0.475682	0.816646	0.582482	0.560242	0.981358	ABCG2	N.S.
414.623	-0.35571	0.323319	-1.10018	0.271252	0.890564	ABCG4	N.S.
0.717001	-2.91647	4.85752	-0.600402	0.548238	NA	ABCG5	N.S.
0.48981	-2.36404	4.89111	-0.483334	0.628859	NA	ABCG8	N.S.
77.2491	-0.636996	0.661711	-0.96265	0.335723	0.927571	ABHD1	N.S.
904.153	-0.224706	0.288696	-0.77835	0.436363	0.957857	ABHD10	N.S.
595.526	0.0109548	0.323679	0.0338445	0.973001	0.998628	ABHD11	N.S.
3917.71	0.279232	0.218878	1.27574	0.202048	0.822751	ABHD12	N.S.
11.5723	-2.74538	1.60411	-1.71146	0.0869956	0.583192	ABHD12B	N.S.
1160.1	0.0200945	0.264059	0.0760986	0.939341	0.997809	ABHD13	N.S.
809.098	-0.175322	0.281809	-0.622128	0.533857	0.9775	ABHD14A	N.S.
48.6288	-0.464185	0.759102	-0.611492	0.540874	0.979198	ABHD14A-ACY1	N.S.
5018.38	-0.468086	0.249075	-1.8793	0.060204	0.486249	ABHD14B	N.S.
4201.08	-0.269493	0.21437	-1.25714	0.208702	0.829705	ABHD15	N.S.
1733.02	0.176702	0.234542	0.753393	0.451214	0.962319	ABHD16A	N.S.
123.504	-0.67186	0.713172	-0.942073	0.346155	0.92979	ABHD16B	N.S.
7411.54	-0.193159	0.255096	-0.757201	0.44893	0.962302	ABHD17A	N.S.
1243.44	-0.00261728	0.256346	-0.01021	0.991854	0.999215	ABHD17B	N.S.
637.25	-0.0683782	0.294213	-0.23241	0.81622	0.997809	ABHD17C	N.S.
581.688	0.0500436	0.301725	0.165858	0.868268	0.997809	ABHD18	N.S.
2209.86	0.189858	0.292713	0.648615	0.516587	0.975168	ABHD2	N.S.
578.029	0.282914	0.317809	0.890202	0.373358	0.940087	ABHD3	N.S.
34.1279	0.36558	0.98526	0.371049	0.710601	0.994815	ABHD4	N.S.
571.851	0.791442	0.313685	2.52304	0.0116344	0.1675	ABHD5	N.S.
686.091	-0.112712	0.282811	-0.398544	0.690229	0.991355	ABHD6	N.S.
2771.01	0.200203	0.231553	0.864611	0.387252	0.943981	ABHD8	N.S.
3696.68	-0.0177458	0.222656	-0.0797005	0.936475	0.997809	ABI1	N.S.
5779.58	-0.456748	0.28896	-1.58066	0.113955	0.659702	ABI2	N.S.
8.19872	-0.230488	1.76684	-0.130452	0.896208	0.997809	ABI3	N.S.
16.7369	0.870088	1.27924	0.680162	0.496402	0.972562	ABI3BP	N.S.
6624.29	0.217957	0.221783	0.982747	0.325732	0.922997	ABL1	N.S.
3540.91	0.103996	0.263866	0.394125	0.693489	0.992567	ABL2	N.S.
725.483	1.81272	0.327874	5.52869	3.22623e-08	2.08629e-06	ABLIM1	padj<0.05 & Upregulated
482.744	-0.103846	0.345058	-0.300953	0.76345	0.997809	ABLIM2	N.S.
116.767	-0.240235	0.538216	-0.446355	0.655341	0.987588	ABLIM3	N.S.
1.1669	3.70506	4.83322	0.766582	0.44333	NA	ABO	N.S.
4418.68	0.174171	0.230696	0.75498	0.450261	0.962319	ABR	N.S.
0.244905	-1.36065	4.99533	-0.272386	0.785326	NA	ABRA	N.S.
2270.83	-0.341173	0.254989	-1.33799	0.180899	0.793837	ABRACL	N.S.
2579.34	-0.195232	0.237721	-0.821266	0.411495	0.949224	ABT1	N.S.
1041.12	0.510316	0.290446	1.75701	0.0789166	0.558124	ABTB1	N.S.
1301.91	1.56562	0.259689	6.0288	1.6518e-09	1.2818e-07	ABTB2	padj<0.05 & Upregulated
0	NA	NA	NA	NA	NA	AC002310.11	N.S.
0	NA	NA	NA	NA	NA	AC002310.13	N.S.
125.594	-0.227133	0.587799	-0.386414	0.69919	0.993485	AC002398.9	N.S.
0.956001	-3.33123	4.83944	-0.68835	0.491233	NA	AC002985.3	N.S.
0	NA	NA	NA	NA	NA	AC003002.4	N.S.
1.9607	2.93352	4.16585	0.704183	0.481319	0.971317	AC003002.6	N.S.
0	NA	NA	NA	NA	NA	AC003005.4	N.S.
0	NA	NA	NA	NA	NA	AC003006.7	N.S.
0	NA	NA	NA	NA	NA	AC004076.7	N.S.
1.92745	0.617687	4.06869	0.151815	0.879333	0.997809	AC004076.9	N.S.
0	NA	NA	NA	NA	NA	AC004158.1	N.S.
1.1669	3.70506	4.83322	0.766582	0.44333	NA	AC004231.7	N.S.
154.476	0.188686	0.456398	0.413424	0.679296	0.989273	AC004381.6	N.S.
3.08795	-2.49397	3.07221	-0.811783	0.416916	0.950004	AC004556.1	N.S.
35.3901	-0.28572	0.926026	-0.308544	0.757668	0.997809	AC004754.3	N.S.
0	NA	NA	NA	NA	NA	AC004813.1	N.S.
0	NA	NA	NA	NA	NA	AC004824.2	N.S.
0	NA	NA	NA	NA	NA	AC004824.3	N.S.
0	NA	NA	NA	NA	NA	AC004853.1	N.S.
0	NA	NA	NA	NA	NA	AC004953.1	N.S.
0	NA	NA	NA	NA	NA	AC005042.1	N.S.
0	NA	NA	NA	NA	NA	AC005477.1	N.S.
0	NA	NA	NA	NA	NA	AC005480.1	N.S.
0	NA	NA	NA	NA	NA	AC005779.2	N.S.
10.0752	3.24275	1.99339	1.62675	0.10379	0.632735	AC005943.2	N.S.
1.07031	0.125453	4.77239	0.0262873	0.979028	NA	AC006026.2	N.S.
0	NA	NA	NA	NA	NA	AC006328.4	N.S.
0	NA	NA	NA	NA	NA	AC006386.1	N.S.
0	NA	NA	NA	NA	NA	AC006445.1	N.S.
61.4221	0.541691	0.683881	0.792084	0.428311	0.952638	AC006449.1	N.S.
61.4221	0.541691	0.683881	0.792084	0.428311	0.952638	AC006449.2	N.S.
3.81302	1.11173	3.12388	0.355881	0.72193	0.994885	AC006486.9	N.S.
0	NA	NA	NA	NA	NA	AC006538.4	N.S.
0	NA	NA	NA	NA	NA	AC006994.3	N.S.
135.578	-0.907197	0.489833	-1.85205	0.064018	0.502814	AC007040.11	N.S.
0	NA	NA	NA	NA	NA	AC007163.2	N.S.
32.4909	1.75816	4.57189	0.384558	0.700565	0.993485	AC007192.4	N.S.
0	NA	NA	NA	NA	NA	AC007325.1	N.S.
582.084	0.501341	0.306591	1.63521	0.102005	0.626975	AC007325.2	N.S.
1861.26	-0.339293	0.246997	-1.37367	0.169543	0.773016	AC007325.4	N.S.
0	NA	NA	NA	NA	NA	AC007326.1	N.S.
0	NA	NA	NA	NA	NA	AC007557.5	N.S.
2.96496	-1.42127	3.15584	-0.45036	0.652451	0.987588	AC007906.1	N.S.
1.3726	3.95312	4.82559	0.819199	0.412673	NA	AC008074.1	N.S.
58.3104	0.850745	3.48628	0.244027	0.80721	0.997809	AC008522.1	N.S.
0	NA	NA	NA	NA	NA	AC008622.1	N.S.
0	NA	NA	NA	NA	NA	AC008641.1	N.S.
0	NA	NA	NA	NA	NA	AC008686.1	N.S.
0	NA	NA	NA	NA	NA	AC008759.1	N.S.
0	NA	NA	NA	NA	NA	AC008810.1	N.S.
0	NA	NA	NA	NA	NA	AC008914.1	N.S.
0	NA	NA	NA	NA	NA	AC009022.1	N.S.
0.244905	-1.36065	4.99533	-0.272386	0.785326	NA	AC009060.2	N.S.
0.244905	-1.36065	4.99533	-0.272386	0.785326	NA	AC009060.3	N.S.
0	NA	NA	NA	NA	NA	AC009065.4	N.S.
0	NA	NA	NA	NA	NA	AC009121.2	N.S.
443.925	-1.19353	0.402369	-2.96626	0.0030145	0.0581904	AC009133.22	N.S.
1.912	-4.33084	4.57408	-0.946824	0.343729	0.928781	AC009133.23	N.S.
24.9248	1.42532	1.18614	1.20165	0.2295	0.852522	AC009336.19	N.S.
0	NA	NA	NA	NA	NA	AC009491.1	N.S.
0	NA	NA	NA	NA	NA	AC009491.2	N.S.
0	NA	NA	NA	NA	NA	AC009758.1	N.S.
320.458	0.721559	0.442281	1.63145	0.102796	0.629842	AC009950.1	N.S.
0	NA	NA	NA	NA	NA	AC009977.1	N.S.
0	NA	NA	NA	NA	NA	AC010184.1	N.S.
0.535831	0.162349	4.97499	0.032633	0.973967	NA	AC010287.1	N.S.
0.244905	-1.36065	4.99533	-0.272386	0.785326	NA	AC010412.1	N.S.
114.966	0.184629	0.519597	0.355331	0.722342	0.994885	AC010547.9	N.S.
135.52	-0.328577	0.506214	-0.649087	0.516282	0.975163	AC010642.1	N.S.
0	NA	NA	NA	NA	NA	AC010646.3	N.S.
0	NA	NA	NA	NA	NA	AC010655.1	N.S.
35.3139	0.155308	0.89274	0.173968	0.861891	0.997809	AC011043.1	N.S.
0	NA	NA	NA	NA	NA	AC011043.2	N.S.
0	NA	NA	NA	NA	NA	AC011155.1	N.S.
0	NA	NA	NA	NA	NA	AC011295.1	N.S.
0	NA	NA	NA	NA	NA	AC011380.1	N.S.
0	NA	NA	NA	NA	NA	AC011513.3	N.S.
0.907312	-3.25904	4.84277	-0.672969	0.500967	NA	AC011530.4	N.S.
0	NA	NA	NA	NA	NA	AC011841.1	N.S.
0.457532	2.37939	4.90525	0.485069	0.627627	NA	AC012005.3	N.S.
0	NA	NA	NA	NA	NA	AC012005.4	N.S.
3910.05	-0.497431	0.233384	-2.13139	0.0330571	0.340705	AC012314.2	N.S.
3909.15	-0.498613	0.233531	-2.1351	0.0327525	0.340181	AC012314.3	N.S.
3909.67	-0.498507	0.233475	-2.13516	0.0327479	0.340181	AC012314.5	N.S.
3910.78	-0.497542	0.23344	-2.13135	0.0330606	0.340705	AC012314.6	N.S.
3909.43	-0.498357	0.233499	-2.1343	0.032818	0.340196	AC012314.7	N.S.
3909.18	-0.4982	0.23348	-2.1338	0.0328592	0.34021	AC012314.9	N.S.
0	NA	NA	NA	NA	NA	AC012363.2	N.S.
0	NA	NA	NA	NA	NA	AC013269.5	N.S.
0	NA	NA	NA	NA	NA	AC013286.1	N.S.
2927.32	-0.180755	0.254738	-0.709574	0.477968	0.970189	AC013461.1	N.S.
1.912	-4.33084	4.57408	-0.946824	0.343729	0.928781	AC015688.3	N.S.
0	NA	NA	NA	NA	NA	AC016142.1	N.S.
0.530664	0.225469	4.9766	0.0453059	0.963863	NA	AC016549.1	N.S.
0	NA	NA	NA	NA	NA	AC016577.1	N.S.
0	NA	NA	NA	NA	NA	AC016734.1	N.S.
0	NA	NA	NA	NA	NA	AC016753.2	N.S.
0	NA	NA	NA	NA	NA	AC017028.10	N.S.
0.291724	1.66547	4.97737	0.334609	0.73792	NA	AC017081.1	N.S.
0	NA	NA	NA	NA	NA	AC018512.1	N.S.
0.48981	-2.36404	4.89111	-0.483334	0.628859	NA	AC018755.18	N.S.
0	NA	NA	NA	NA	NA	AC018867.1	N.S.
0	NA	NA	NA	NA	NA	AC018902.1	N.S.
0	NA	NA	NA	NA	NA	AC019206.1	N.S.
3.83666	0.654086	2.58188	0.253337	0.800008	0.997809	AC021106.1	N.S.
0	NA	NA	NA	NA	NA	AC022016.1	N.S.
0	NA	NA	NA	NA	NA	AC022210.1	N.S.
0.244905	-1.36065	4.99533	-0.272386	0.785326	NA	AC022405.1	N.S.
0	NA	NA	NA	NA	NA	AC022819.2	N.S.
0	NA	NA	NA	NA	NA	AC023491.2	N.S.
0	NA	NA	NA	NA	NA	AC024060.1	N.S.
0	NA	NA	NA	NA	NA	AC024361.1	N.S.
170.643	-0.067898	0.466818	-0.145448	0.884357	0.997809	AC024592.12	N.S.
0	NA	NA	NA	NA	NA	AC025263.3	N.S.
1.07031	0.125453	4.77239	0.0262873	0.979028	NA	AC026248.1	N.S.
0.686298	2.95897	4.86575	0.608122	0.543107	NA	AC026369.1	N.S.
0	NA	NA	NA	NA	NA	AC026449.1	N.S.
15.5229	0.159008	1.31986	0.120473	0.904108	0.997809	AC037459.4	N.S.
0	NA	NA	NA	NA	NA	AC037482.2	N.S.
0	NA	NA	NA	NA	NA	AC044810.2	N.S.
0	NA	NA	NA	NA	NA	AC055733.1	N.S.
0	NA	NA	NA	NA	NA	AC055866.1	N.S.
0	NA	NA	NA	NA	NA	AC063956.1	N.S.
0	NA	NA	NA	NA	NA	AC063956.2	N.S.
0	NA	NA	NA	NA	NA	AC064829.1	N.S.
0	NA	NA	NA	NA	NA	AC066615.1	N.S.
25.5948	-0.0888613	1.14129	-0.0778602	0.937939	0.997809	AC068533.7	N.S.
0	NA	NA	NA	NA	NA	AC069063.1	N.S.
0.483932	-2.34817	4.89227	-0.479975	0.631245	NA	AC069063.2	N.S.
0	NA	NA	NA	NA	NA	AC069368.3	N.S.
0	NA	NA	NA	NA	NA	AC069499.1	N.S.
0	NA	NA	NA	NA	NA	AC073072.1	N.S.
0	NA	NA	NA	NA	NA	AC073130.2	N.S.
1.09483	1.72231	4.84456	0.355515	0.722204	NA	AC073333.1	N.S.
0	NA	NA	NA	NA	NA	AC073610.5	N.S.
0	NA	NA	NA	NA	NA	AC073657.1	N.S.
0	NA	NA	NA	NA	NA	AC074033.1	N.S.
0	NA	NA	NA	NA	NA	AC079355.1	N.S.
0	NA	NA	NA	NA	NA	AC079907.1	N.S.
31.1831	-0.0800978	4.56944	-0.017529	0.986015	0.998628	AC084219.2	N.S.
0	NA	NA	NA	NA	NA	AC087350.1	N.S.
0	NA	NA	NA	NA	NA	AC087392.1	N.S.
0	NA	NA	NA	NA	NA	AC087651.1	N.S.
0	NA	NA	NA	NA	NA	AC087651.2	N.S.
0	NA	NA	NA	NA	NA	AC087762.1	N.S.
0	NA	NA	NA	NA	NA	AC090154.1	N.S.
10806.4	-0.304996	0.230218	-1.32481	0.185233	0.800339	AC090498.1	N.S.
0	NA	NA	NA	NA	NA	AC090958.1	N.S.
0	NA	NA	NA	NA	NA	AC091180.1	N.S.
0	NA	NA	NA	NA	NA	AC091304.2	N.S.
0	NA	NA	NA	NA	NA	AC092159.1	N.S.
0	NA	NA	NA	NA	NA	AC092384.1	N.S.
0.228766	1.48804	4.9887	0.298281	0.765489	NA	AC092718.1	N.S.
97.1462	-0.308516	0.604542	-0.51033	0.60982	0.985604	AC092835.2	N.S.
1.45175	-3.93307	4.58297	-0.858192	0.390787	NA	AC092881.1	N.S.
0	NA	NA	NA	NA	NA	AC100821.2	N.S.
0	NA	NA	NA	NA	NA	AC104057.1	N.S.
0	NA	NA	NA	NA	NA	AC104073.2	N.S.
0	NA	NA	NA	NA	NA	AC104389.1	N.S.
0	NA	NA	NA	NA	NA	AC104389.2	N.S.
1.69772	-2.5624	3.96959	-0.645508	0.518598	0.976078	AC104532.2	N.S.
1.673	-4.1382	4.81608	-0.859246	0.390205	0.943989	AC104534.3	N.S.
0	NA	NA	NA	NA	NA	AC104581.1	N.S.
0	NA	NA	NA	NA	NA	AC104650.2	N.S.
0	NA	NA	NA	NA	NA	AC104981.1	N.S.
0	NA	NA	NA	NA	NA	AC105009.1	N.S.
0.500271	-2.39185	4.88914	-0.489217	0.624688	NA	AC105052.2	N.S.
0	NA	NA	NA	NA	NA	AC107081.1	N.S.
0.252886	-1.39406	4.9898	-0.279383	0.779951	NA	AC108925.1	N.S.
1.46943	-3.94997	4.82044	-0.819422	0.412546	0.949224	AC108938.5	N.S.
0	NA	NA	NA	NA	NA	AC109344.1	N.S.
2.65273	0.173433	3.23073	0.0536824	0.957188	0.998406	AC109486.1	N.S.
0	NA	NA	NA	NA	NA	AC109829.1	N.S.
0	NA	NA	NA	NA	NA	AC109829.2	N.S.
0	NA	NA	NA	NA	NA	AC110602.1	N.S.
0	NA	NA	NA	NA	NA	AC110615.1	N.S.
0	NA	NA	NA	NA	NA	AC112719.2	N.S.
138.791	-0.091753	0.488715	-0.187744	0.851078	0.997809	AC113404.1	N.S.
0	NA	NA	NA	NA	NA	AC118758.1	N.S.
0	NA	NA	NA	NA	NA	AC123512.1	N.S.
0	NA	NA	NA	NA	NA	AC123512.2	N.S.
0	NA	NA	NA	NA	NA	AC123512.3	N.S.
0.956001	-3.33123	4.83944	-0.68835	0.491233	NA	AC124312.1	N.S.
0	NA	NA	NA	NA	NA	AC126407.1	N.S.
154.649	-1.04272	0.542911	-1.92061	0.0547815	0.460003	AC129492.1	N.S.
31.7188	0.269782	0.970019	0.27812	0.78092	0.997809	AC130310.1	N.S.
0	NA	NA	NA	NA	NA	AC131263.1	N.S.
4.6532	-5.6131	3.28043	-1.71109	0.087065	0.583192	AC133551.1	N.S.
0	NA	NA	NA	NA	NA	AC136352.4	N.S.
0	NA	NA	NA	NA	NA	AC136352.5	N.S.
100.79	-0.676318	0.560825	-1.20593	0.227843	0.851033	AC136612.1	N.S.
1035.21	0.54377	0.340226	1.59826	0.109985	0.65063	AC136616.1	N.S.
0	NA	NA	NA	NA	NA	AC136616.2	N.S.
0	NA	NA	NA	NA	NA	AC136616.3	N.S.
0	NA	NA	NA	NA	NA	AC138028.1	N.S.
2304.81	0.608111	0.253373	2.40006	0.0163923	0.2156	AC138969.4	N.S.
0	NA	NA	NA	NA	NA	AC141272.1	N.S.
0	NA	NA	NA	NA	NA	AC142525.1	N.S.
610.73	0.33249	0.334477	0.994062	0.320193	0.920346	AC145212.2	N.S.
278.309	0.0653984	0.390791	0.167349	0.867096	0.997809	AC145212.4	N.S.
115.044	-0.256488	0.527377	-0.486346	0.626722	0.987533	AC156455.2	N.S.
0	NA	NA	NA	NA	NA	AC171558.1	N.S.
0	NA	NA	NA	NA	NA	AC171558.2	N.S.
0	NA	NA	NA	NA	NA	AC208162.1	N.S.
0	NA	NA	NA	NA	NA	AC213203.1	N.S.
0	NA	NA	NA	NA	NA	AC231657.1	N.S.
0	NA	NA	NA	NA	NA	AC233755.1	N.S.
0	NA	NA	NA	NA	NA	AC233755.2	N.S.
0	NA	NA	NA	NA	NA	AC234582.1	N.S.
0.536143	0.182506	4.97507	0.0366841	0.970737	NA	AC234582.2	N.S.
0	NA	NA	NA	NA	NA	AC236040.1	N.S.
1800.07	0.239677	0.333654	0.718342	0.472547	0.970096	AC240274.1	N.S.
4.3838	1.01146	2.32638	0.43478	0.663722	0.987588	AC241377.2	N.S.
287.144	-0.0308756	0.434877	-0.0709983	0.943399	0.997809	AC241585.2	N.S.
0	NA	NA	NA	NA	NA	AC242988.1	N.S.
12.2796	-0.79033	1.45782	-0.54213	0.587729	0.983735	AC243687.1	N.S.
0	NA	NA	NA	NA	NA	AC243756.1	N.S.
0	NA	NA	NA	NA	NA	AC243790.2	N.S.
0	NA	NA	NA	NA	NA	AC243945.1	N.S.
0	NA	NA	NA	NA	NA	AC245015.1	N.S.
301.454	-0.0466026	0.412161	-0.113069	0.909976	0.997809	AC245100.1	N.S.
94.5879	0.301021	0.565856	0.531974	0.594744	0.983845	AC253572.1	N.S.
4.84657	-5.67221	2.82923	-2.00486	0.0449782	0.411776	AC254560.1	N.S.
1.14003	3.68421	4.83377	0.762183	0.445951	NA	AC254788.1	N.S.
0	NA	NA	NA	NA	NA	AC254847.1	N.S.
0	NA	NA	NA	NA	NA	AC254944.3	N.S.
0	NA	NA	NA	NA	NA	AC254995.1	N.S.
2214.05	0.0289023	0.232783	0.12416	0.901189	0.997809	ACAA1	N.S.
3297.13	-0.339835	0.229007	-1.48395	0.137823	0.716473	ACAA2	N.S.
6242	-0.24516	0.21866	-1.12119	0.262206	0.885834	ACACA	N.S.
1037.33	-0.453181	0.2596	-1.74569	0.0808648	0.563989	ACACB	N.S.
1779.05	-0.374203	0.261869	-1.42897	0.153013	0.748428	ACAD10	N.S.
1577.61	-0.640392	0.297054	-2.15581	0.0310984	0.33058	ACAD11	N.S.
1295.33	0.126371	0.258957	0.487999	0.625551	0.987344	ACAD8	N.S.
1545.57	-0.114355	0.267254	-0.427889	0.668732	0.987979	ACAD9	N.S.
0	NA	NA	NA	NA	NA	ACADL	N.S.
2035.06	-0.471645	0.284874	-1.65563	0.0977977	0.615749	ACADM	N.S.
352.401	0.101944	0.37855	0.269303	0.787697	0.997809	ACADS	N.S.
995.611	-0.206021	0.26716	-0.771152	0.440617	0.958765	ACADSB	N.S.
10663.3	-0.371644	0.286231	-1.29841	0.194148	0.813602	ACADVL	N.S.
11.8601	-0.137797	1.84188	-0.0748134	0.940363	0.997809	ACAN	N.S.
127.829	-1.02846	0.581224	-1.76948	0.0768139	0.55269	ACAP1	N.S.
4223.79	-0.044383	0.261988	-0.169409	0.865475	0.997809	ACAP2	N.S.
7283.72	-0.45527	0.227478	-2.00138	0.0453516	0.413062	ACAP3	N.S.
3463.47	-0.445367	0.271433	-1.6408	0.100838	0.622767	ACAT1	N.S.
997.501	-0.378141	0.282572	-1.33821	0.180828	0.793837	ACAT2	N.S.
9802.16	0.339947	0.235599	1.44291	0.149046	0.741391	ACBD3	N.S.
982.63	-0.493266	0.324281	-1.52111	0.128233	0.695698	ACBD4	N.S.
2217.89	-0.14769	0.255068	-0.579024	0.562573	0.981358	ACBD5	N.S.
2825.65	-0.243986	0.233175	-1.04636	0.295393	0.904069	ACBD6	N.S.
49.4682	-0.170487	0.746953	-0.228243	0.819457	0.997809	ACBD7	N.S.
615.509	-0.640598	0.400959	-1.59766	0.110118	0.650791	ACCS	N.S.
0	NA	NA	NA	NA	NA	ACCSL	N.S.
1072.19	-0.100763	0.252349	-0.399298	0.689674	0.991355	ACD	N.S.
5.8988	1.88001	2.08506	0.901661	0.367237	0.937112	ACE	N.S.
1.98718	4.46841	4.03147	1.10838	0.267697	0.888902	ACE2	N.S.
0.291724	1.66547	4.97737	0.334609	0.73792	NA	ACER1	N.S.
303.701	0.460035	0.371223	1.23924	0.215256	0.838128	ACER2	N.S.
1707.94	-0.0416334	0.268744	-0.154919	0.876885	0.997809	ACER3	N.S.
1012.35	0.906641	0.327699	2.76669	0.00566286	0.0975445	ACHE	N.S.
8455.99	0.181916	0.225722	0.805932	0.420282	0.950804	ACIN1	N.S.
0.291724	1.66547	4.97737	0.334609	0.73792	NA	ACKR1	N.S.
34.901	-0.377876	0.941865	-0.4012	0.688273	0.991203	ACKR2	N.S.
29.9761	8.3949	1.75185	4.79203	1.65106e-06	8.109e-05	ACKR3	padj<0.05 & Upregulated
5.04891	-1.01204	2.22468	-0.454917	0.649169	0.987588	ACKR4	N.S.
27497.6	-0.076539	0.213622	-0.358292	0.720125	0.994885	ACLY	N.S.
0.239	-1.3429	4.99659	-0.268763	0.788112	NA	ACMSD	N.S.
2880.24	-0.78405	0.240285	-3.263	0.00110238	0.0253842	ACO1	padj<0.05 & Downregulated
10154.5	-0.279826	0.210506	-1.3293	0.183748	0.798161	ACO2	N.S.
212.193	-0.337866	0.402844	-0.838703	0.401636	0.946904	ACOT1	N.S.
666.679	-0.24823	0.287068	-0.864705	0.387201	0.943981	ACOT11	N.S.
5.26596	-3.36308	2.30124	-1.46142	0.143899	0.73008	ACOT12	N.S.
1927.75	0.1408	0.256186	0.549599	0.582594	0.983735	ACOT13	N.S.
3139.91	-0.356184	0.250255	-1.42329	0.154653	0.750771	ACOT2	N.S.
2.36196	3.14334	3.55211	0.884923	0.376198	0.941214	ACOT4	N.S.
2.19928	-2.98398	3.99007	-0.747852	0.45455	0.963021	ACOT6	N.S.
6586.17	-0.451042	0.243873	-1.8495	0.0643863	0.50494	ACOT7	N.S.
628.488	-0.126312	0.313587	-0.402798	0.687097	0.991203	ACOT8	N.S.
2467.62	-0.111091	0.272541	-0.407612	0.683559	0.991157	ACOT9	N.S.
3788.8	-0.234671	0.215197	-1.0905	0.275495	0.894345	ACOX1	N.S.
36.5711	6.44697	1.55185	4.15438	3.26171e-05	0.00116105	ACOX2	padj<0.05 & Upregulated
1036.49	-0.0170357	0.271671	-0.0627073	0.95	0.997992	ACOX3	N.S.
6.19051	-0.745894	2.27702	-0.327575	0.743233	0.997179	ACOXL	N.S.
6511.38	0.078518	0.216007	0.363497	0.716233	0.994885	ACP1	N.S.
1961.44	-0.0249126	0.241698	-0.103073	0.917905	0.997809	ACP2	N.S.
9.95272	0.626008	1.66114	0.376855	0.706282	0.994139	ACP5	N.S.
1308.11	-0.188335	0.261352	-0.720619	0.471144	0.969525	ACP6	N.S.
0	NA	NA	NA	NA	NA	ACP7	N.S.
0	NA	NA	NA	NA	NA	ACPP	N.S.
0	NA	NA	NA	NA	NA	ACPT	N.S.
15.5766	1.83433	1.42906	1.2836	0.199284	0.819307	ACR	N.S.
21.0187	1.69697	1.12679	1.50601	0.132064	0.705796	ACRBP	N.S.
59.6217	0.26682	0.772255	0.345508	0.729713	0.995354	ACRC	N.S.
3.69554	-4.23063	3.30268	-1.28097	0.200205	0.820477	ACRV1	N.S.
4.99815	-0.489131	2.17897	-0.224478	0.822385	0.997809	ACSBG1	N.S.
0.239	-1.3429	4.99659	-0.268763	0.788112	NA	ACSBG2	N.S.
1488.6	-0.492899	0.256825	-1.91921	0.0549584	0.460422	ACSF2	N.S.
1687.95	0.105465	0.246303	0.428192	0.668511	0.987841	ACSF3	N.S.
2416.68	0.105668	0.240599	0.439187	0.660526	0.987588	ACSL1	N.S.
3603.15	0.425718	0.217542	1.95695	0.0503532	0.4372	ACSL3	N.S.
1294.1	0.289323	0.280294	1.03221	0.301972	0.91002	ACSL4	N.S.
35.0996	8.62265	1.71235	5.03557	4.76424e-07	2.54969e-05	ACSL5	padj<0.05 & Upregulated
86.7702	0.142966	0.667391	0.214217	0.830378	0.997809	ACSL6	N.S.
0	NA	NA	NA	NA	NA	ACSM1	N.S.
0	NA	NA	NA	NA	NA	ACSM2A	N.S.
0	NA	NA	NA	NA	NA	ACSM2B	N.S.
2.61204	0.105534	3.27035	0.0322699	0.974257	0.998628	ACSM3	N.S.
0	NA	NA	NA	NA	NA	ACSM4	N.S.
0.244905	-1.36065	4.99533	-0.272386	0.785326	NA	ACSM5	N.S.
0.686298	2.95897	4.86575	0.608122	0.543107	NA	ACSM6	N.S.
0	NA	NA	NA	NA	NA	ACSS1	N.S.
12130.2	-0.495188	0.276191	-1.79292	0.072986	0.537142	ACSS2	N.S.
3.20604	4.11841	3.46627	1.18814	0.234778	0.858322	ACSS3	N.S.
22.0529	0.0283515	1.10487	0.0256605	0.979528	0.998628	ACTA1	N.S.
2070.52	0.131638	0.291068	0.452257	0.651084	0.987588	ACTA2	N.S.
161911	-0.393976	0.24236	-1.62558	0.104039	0.633955	ACTB	N.S.
104.498	8.74689	1.56088	5.60382	2.09678e-08	1.39069e-06	ACTBL2	padj<0.05 & Upregulated
0.5307	0.227002	4.97652	0.0456145	0.963618	NA	ACTC1	N.S.
241597	-0.271274	0.201272	-1.3478	0.177723	0.789266	ACTG1	N.S.
1.75034	4.29229	4.74791	0.904037	0.365976	0.937081	ACTG2	N.S.
6.53398	-1.81218	2.00512	-0.903776	0.366114	0.937081	ACTL10	N.S.
2003.41	0.198588	0.241973	0.820704	0.411815	0.949224	ACTL6A	N.S.
7.65788	-0.0886988	1.99159	-0.0445366	0.964477	0.998406	ACTL6B	N.S.
0	NA	NA	NA	NA	NA	ACTL7A	N.S.
2.54927	3.25926	3.38983	0.961481	0.33631	0.927883	ACTL7B	N.S.
1.71434	-4.17243	4.78438	-0.872094	0.383157	0.943981	ACTL8	N.S.
0	NA	NA	NA	NA	NA	ACTL9	N.S.
13628.7	0.361415	0.206779	1.74783	0.0804939	0.56324	ACTN1	N.S.
22.865	0.831371	1.21191	0.686001	0.492713	0.972562	ACTN2	N.S.
8.58173	2.70691	1.8079	1.49727	0.134324	0.71005	ACTN3	N.S.
17295.6	0.894167	0.206176	4.33692	1.44495e-05	0.00055509	ACTN4	padj<0.05 & Upregulated
4053.95	0.0463716	0.234234	0.197971	0.843067	0.997809	ACTR10	N.S.
9300.26	-0.160814	0.20831	-0.771991	0.44012	0.958765	ACTR1A	N.S.
3758.51	-0.0942036	0.251133	-0.375115	0.707575	0.994139	ACTR1B	N.S.
33976.4	-0.223077	0.209186	-1.0664	0.286241	0.899895	ACTR2	N.S.
15617.4	-0.185142	0.20696	-0.894575	0.371014	0.939492	ACTR3	N.S.
350.333	-0.0834496	0.345957	-0.241213	0.80939	0.997809	ACTR3B	N.S.
3.50069	5.29272	3.62711	1.45921	0.144506	0.731726	ACTR3C	N.S.
421.801	-0.202241	0.323942	-0.624313	0.532422	0.9775	ACTR5	N.S.
1131.3	-0.197661	0.284077	-0.695799	0.486555	0.972562	ACTR6	N.S.
1541.83	-0.201661	0.238797	-0.844487	0.398397	0.946644	ACTR8	N.S.
0	NA	NA	NA	NA	NA	ACTRT1	N.S.
0	NA	NA	NA	NA	NA	ACTRT2	N.S.
298.936	-0.149246	0.36068	-0.413791	0.679027	0.989269	ACTRT3	N.S.
1475.1	0.158779	0.238892	0.664648	0.506276	0.972562	ACVR1	N.S.
1510.62	0.340232	0.24944	1.36398	0.172573	0.779432	ACVR1B	N.S.
62.4862	0.659775	0.729476	0.904451	0.365756	0.937081	ACVR1C	N.S.
1052.22	-0.0321077	0.27555	-0.116522	0.907239	0.997809	ACVR2A	N.S.
731.526	-0.0621477	0.354669	-0.175227	0.860901	0.997809	ACVR2B	N.S.
47.3663	5.57657	1.02919	5.4184	6.01364e-08	3.82507e-06	ACVRL1	padj<0.05 & Upregulated
1379.96	-0.516265	0.346998	-1.4878	0.136803	0.71537	ACY1	N.S.
0	NA	NA	NA	NA	NA	ACY3	N.S.
227.228	0.107485	0.410924	0.261569	0.793653	0.997809	ACYP1	N.S.
478.497	0.0361175	0.352776	0.102381	0.918455	0.997809	ACYP2	N.S.
38.3735	-1.0953	0.954786	-1.14717	0.251312	0.874716	AD000671.6	N.S.
1160.75	-0.154944	0.249175	-0.621829	0.534055	0.977536	ADA	N.S.
0	NA	NA	NA	NA	NA	ADAD1	N.S.
3.6127	5.33372	3.1676	1.68384	0.0922131	0.597806	ADAD2	N.S.
191.505	-0.249796	0.444447	-0.562038	0.57409	0.983214	ADAL	N.S.
4491.58	0.243305	0.223212	1.09002	0.275705	0.894345	ADAM10	N.S.
2222.07	-0.631191	0.268097	-2.35434	0.0185556	0.235274	ADAM11	N.S.
10.3753	4.27901	2.03017	2.10771	0.0350561	0.354444	ADAM12	N.S.
4959.28	0.200739	0.218807	0.917423	0.358921	0.937081	ADAM15	N.S.
4851.39	0.141399	0.221422	0.638597	0.523085	0.976876	ADAM17	N.S.
0	NA	NA	NA	NA	NA	ADAM18	N.S.
2425.2	1.1367	0.254508	4.46629	7.95891e-06	0.000336573	ADAM19	padj<0.05 & Upregulated
0.478001	-2.33203	4.89347	-0.47656	0.633676	NA	ADAM2	N.S.
2.32044	3.10799	3.51462	0.884302	0.376533	0.941214	ADAM20	N.S.
6.95255	3.08376	2.16909	1.42168	0.155118	0.751867	ADAM21	N.S.
945.731	-0.625304	0.376287	-1.66178	0.0965577	0.612911	ADAM22	N.S.
2404.89	-0.652657	0.250165	-2.60891	0.00908314	0.140269	ADAM23	N.S.
0	NA	NA	NA	NA	NA	ADAM28	N.S.
0.708251	-2.89961	4.85859	-0.596801	0.55064	NA	ADAM29	N.S.
0	NA	NA	NA	NA	NA	ADAM30	N.S.
6.56444	0.164648	1.97814	0.0832334	0.933666	0.997809	ADAM32	N.S.
1.15779	0.436838	4.75859	0.0917998	0.926857	NA	ADAM33	N.S.
0	NA	NA	NA	NA	NA	ADAM7	N.S.
224.287	-0.543517	0.423265	-1.2841	0.199106	0.819225	ADAM8	N.S.
6685.53	0.239222	0.218547	1.0946	0.273691	0.892147	ADAM9	N.S.
0.291724	1.66547	4.97737	0.334609	0.73792	NA	ADAMDEC1	N.S.
8831.28	-0.180808	0.26609	-0.679499	0.496822	0.972562	ADAMTS1	N.S.
493.845	0.174034	0.351137	0.495628	0.620157	0.986657	ADAMTS10	N.S.
3.99305	5.42618	3.24897	1.67012	0.0948951	0.607796	ADAMTS12	N.S.
1362.55	-0.00454686	0.297787	-0.0152689	0.987818	0.998628	ADAMTS13	N.S.
112.662	1.86264	0.593506	3.13837	0.00169892	0.0367743	ADAMTS14	padj<0.05 & Upregulated
431.292	1.78721	0.351215	5.08866	3.60599e-07	1.9706e-05	ADAMTS15	padj<0.05 & Upregulated
2.06701	4.53744	3.94919	1.14895	0.250575	0.874674	ADAMTS16	N.S.
73.2943	1.31588	0.794124	1.65702	0.0975164	0.615081	ADAMTS17	N.S.
0	NA	NA	NA	NA	NA	ADAMTS18	N.S.
0	NA	NA	NA	NA	NA	ADAMTS19	N.S.
365.362	-0.0918826	0.363883	-0.252506	0.80065	0.997809	ADAMTS2	N.S.
0	NA	NA	NA	NA	NA	ADAMTS20	N.S.
16.5061	0.912959	1.26818	0.719898	0.471588	0.9699	ADAMTS3	N.S.
15.9477	1.8828	1.30188	1.44622	0.148116	0.738438	ADAMTS4	N.S.
13.3008	-0.61551	1.48319	-0.414991	0.678149	0.989158	ADAMTS5	N.S.
471.61	-1.49335	0.322213	-4.63466	3.57519e-06	0.000162242	ADAMTS6	padj<0.05 & Downregulated
4848.25	-0.441751	0.279024	-1.5832	0.113375	0.658035	ADAMTS7	N.S.
48.6969	1.27275	0.780942	1.62976	0.103153	0.630786	ADAMTS8	N.S.
0.239	-1.3429	4.99659	-0.268763	0.788112	NA	ADAMTS9	N.S.
73.4853	-0.490305	0.653627	-0.75013	0.453177	0.962486	ADAMTSL1	N.S.
0	NA	NA	NA	NA	NA	ADAMTSL2	N.S.
3734.41	0.0645373	0.273104	0.23631	0.813192	0.997809	ADAMTSL3	N.S.
3225.42	0.298227	0.273537	1.09026	0.275598	0.894345	ADAMTSL4	N.S.
1370.58	0.182702	0.291899	0.625908	0.531375	0.9775	ADAMTSL5	N.S.
2212.72	-0.160071	0.232688	-0.687923	0.491501	0.972562	ADAP1	N.S.
2118.76	-0.439216	0.233753	-1.87897	0.0602484	0.486249	ADAP2	N.S.
37853.5	0.681206	0.213841	3.18557	0.00144471	0.0320312	ADAR	padj<0.05 & Upregulated
902.022	-0.205394	0.280616	-0.73194	0.464205	0.965817	ADARB1	N.S.
0.686298	2.95897	4.86575	0.608122	0.543107	NA	ADARB2	N.S.
932.63	-0.266911	0.264003	-1.01102	0.312009	0.915037	ADAT1	N.S.
300.581	-0.320447	0.421384	-0.760463	0.446978	0.962237	ADAT2	N.S.
847.607	-0.541223	0.334458	-1.61821	0.105617	0.637315	ADAT3	N.S.
523.105	-0.299006	0.31478	-0.949888	0.342169	0.928781	ADCK1	N.S.
2757.17	-0.344746	0.238625	-1.44472	0.148537	0.740062	ADCK2	N.S.
3056.66	0.294784	0.221943	1.3282	0.184113	0.799061	ADCK3	N.S.
1530.28	-0.507744	0.260396	-1.94989	0.0511896	0.441614	ADCK4	N.S.
508.617	-0.301666	0.385454	-0.782626	0.433847	0.956101	ADCK5	N.S.
3551.69	-0.131734	0.247268	-0.532757	0.594202	0.983802	ADCY1	N.S.
5.50789	-0.745783	2.19217	-0.340203	0.733703	0.995548	ADCY10	N.S.
0.228766	1.48804	4.9887	0.298281	0.765489	NA	ADCY2	N.S.
3451.88	-0.137951	0.224318	-0.614978	0.538569	0.978847	ADCY3	N.S.
1.83706	-2.55082	4.27615	-0.596523	0.550826	0.980359	ADCY4	N.S.
919.167	1.01435	0.278417	3.64327	0.000269196	0.00746058	ADCY5	padj<0.05 & Upregulated
4918.31	-0.13486	0.222631	-0.605756	0.544677	0.979198	ADCY6	N.S.
2923.68	-0.137864	0.2892	-0.47671	0.633569	0.987588	ADCY7	N.S.
1.21296	-2.17152	4.8447	-0.448225	0.653991	NA	ADCY8	N.S.
2953.59	0.187925	0.313507	0.599428	0.548887	0.980014	ADCY9	N.S.
3.57241	2.14422	2.81994	0.760377	0.44703	0.962237	ADCYAP1	N.S.
123.298	-0.334748	0.518423	-0.645704	0.518471	0.976078	ADCYAP1R1	N.S.
15940.7	-0.0540745	0.207766	-0.260267	0.794658	0.997809	ADD1	N.S.
7772.22	-0.178921	0.285044	-0.627695	0.530204	0.977288	ADD2	N.S.
2667.19	0.409727	0.249021	1.64535	0.0998967	0.619911	ADD3	N.S.
1.07244	0.213988	4.77259	0.0448368	0.964237	NA	ADGB	N.S.
122.693	0.259114	0.564165	0.459288	0.646027	0.987588	ADGRA1	N.S.
1538.65	0.202444	0.24099	0.840053	0.400879	0.946904	ADGRA2	N.S.
3599.25	-0.304433	0.237001	-1.28452	0.19896	0.819225	ADGRA3	N.S.
2553.68	-0.377253	0.287131	-1.31387	0.188889	0.806704	ADGRB1	N.S.
2374.28	0.220761	0.259554	0.850542	0.395024	0.945669	ADGRB2	N.S.
31.2658	-1.01188	0.982681	-1.02971	0.303144	0.910704	ADGRB3	N.S.
12.9515	0.68937	1.52852	0.451006	0.651985	0.987588	ADGRD1	N.S.
0	NA	NA	NA	NA	NA	ADGRD2	N.S.
8.01503	6.48905	2.43229	2.66788	0.00763315	0.124179	ADGRE1	N.S.
16.6451	0.627271	1.28824	0.486919	0.626315	0.987533	ADGRE2	N.S.
0	NA	NA	NA	NA	NA	ADGRE3	N.S.
6021.39	-0.31563	0.228594	-1.38075	0.167357	0.770507	ADGRE5	N.S.
1.41116	-2.7914	4.32321	-0.645678	0.518488	NA	ADGRF1	N.S.
2.33482	0.839774	3.78851	0.221663	0.824576	0.997809	ADGRF2	N.S.
4.80366	3.77226	2.62135	1.43905	0.150136	0.742546	ADGRF3	N.S.
21.2192	5.40159	1.54629	3.49326	0.000477166	0.0122004	ADGRF4	padj<0.05 & Upregulated
68.1343	-0.453281	0.722949	-0.626988	0.530667	0.977452	ADGRF5	N.S.
116.466	4.34443	0.682228	6.36801	1.91496e-10	1.73802e-08	ADGRG1	padj<0.05 & Upregulated
33.934	1.12694	0.9305	1.21111	0.225852	0.850109	ADGRG2	N.S.
1.56148	4.132	4.44619	0.929335	0.352716	0.933622	ADGRG3	N.S.
0.244905	-1.36065	4.99533	-0.272386	0.785326	NA	ADGRG4	N.S.
3.47087	0.328068	2.87831	0.113979	0.909254	0.997809	ADGRG5	N.S.
7625.7	-0.20964	0.261227	-0.802519	0.422253	0.950804	ADGRG6	N.S.
0	NA	NA	NA	NA	NA	ADGRG7	N.S.
7029.08	0.19709	0.211295	0.93277	0.350938	0.932302	ADGRL1	N.S.
11273.9	-0.424881	0.233096	-1.82277	0.0683378	0.523755	ADGRL2	N.S.
23.1642	-0.0923324	1.19752	-0.0771031	0.938542	0.997809	ADGRL3	N.S.
1.79026	4.33023	4.19461	1.03233	0.301917	0.91002	ADGRL4	N.S.
2782.94	0.198005	0.250229	0.791297	0.428771	0.952638	ADGRV1	N.S.
0	NA	NA	NA	NA	NA	ADH1A	N.S.
0.583448	2.6981	4.88162	0.552705	0.580466	NA	ADH1B	N.S.
0	NA	NA	NA	NA	NA	ADH1C	N.S.
1.22453	-3.68684	4.82755	-0.763709	0.445041	NA	ADH4	N.S.
6718.22	0.0034055	0.219535	0.0155123	0.987623	0.998628	ADH5	N.S.
1.63218	0.363001	4.37669	0.0829395	0.9339	0.997809	ADH6	N.S.
0	NA	NA	NA	NA	NA	ADH7	N.S.
10.7771	-1.41532	1.58337	-0.893867	0.371393	0.939519	ADHFE1	N.S.
3217.3	-0.113207	0.249171	-0.454335	0.649588	0.987588	ADI1	N.S.
0	NA	NA	NA	NA	NA	ADIG	N.S.
0.228766	1.48804	4.9887	0.298281	0.765489	NA	ADIPOQ	N.S.
8211.39	0.0757378	0.211876	0.357463	0.720745	0.994885	ADIPOR1	N.S.
5008.33	0.0865523	0.227429	0.380568	0.703524	0.993704	ADIPOR2	N.S.
0.905651	3.33115	4.85011	0.686819	0.492197	NA	ADIRF	N.S.
1241.78	-0.16084	0.250249	-0.64272	0.520406	0.976423	ADK	N.S.
3962.41	0.628034	0.276887	2.26819	0.0233173	0.271482	ADM	N.S.
1.75039	-2.38852	3.92318	-0.608823	0.542642	0.979198	ADM2	N.S.
45.2428	-0.112254	0.781508	-0.143638	0.885787	0.997809	ADM5	N.S.
3228.57	-0.155513	0.233266	-0.666676	0.504979	0.972562	ADNP	N.S.
2636.08	0.0118749	0.240982	0.049277	0.960699	0.998406	ADNP2	N.S.
2279.37	-0.103685	0.22713	-0.456499	0.648031	0.987588	ADO	N.S.
101.926	0.671699	0.555947	1.20821	0.226968	0.850109	ADORA1	N.S.
32.7476	1.41544	0.940519	1.50496	0.132335	0.706756	ADORA2A	N.S.
628.99	0.601836	0.288487	2.08618	0.0369623	0.366084	ADORA2B	N.S.
0	NA	NA	NA	NA	NA	ADORA3	N.S.
2866.85	-0.0638365	0.232031	-0.275121	0.783223	0.997809	ADPGK	N.S.
0.291724	1.66547	4.97737	0.334609	0.73792	NA	ADPRH	N.S.
1114	-0.3315	0.272071	-1.21843	0.223061	0.847482	ADPRHL1	N.S.
2701.37	0.289092	0.239317	1.20799	0.227053	0.850109	ADPRHL2	N.S.
336.458	0.529974	0.351105	1.50945	0.131185	0.702853	ADPRM	N.S.
0	NA	NA	NA	NA	NA	ADRA1A	N.S.
12.3704	4.5994	1.87101	2.45824	0.013962	0.190427	ADRA1B	N.S.
31.9845	-1.94193	0.985017	-1.97147	0.0486699	0.43114	ADRA1D	N.S.
10.9818	-0.563403	1.6885	-0.333672	0.738627	0.996981	ADRA2A	N.S.
44.5567	0.3033	0.869881	0.348668	0.727339	0.994885	ADRA2B	N.S.
4123.34	-0.205028	0.230276	-0.890357	0.373274	0.940087	ADRA2C	N.S.
10.3016	2.62197	1.84542	1.4208	0.155375	0.75208	ADRB1	N.S.
3.08167	5.10922	3.41382	1.49663	0.13449	0.710205	ADRB2	N.S.
0	NA	NA	NA	NA	NA	ADRB3	N.S.
4057.51	-0.264386	0.246973	-1.07051	0.28439	0.898981	ADRBK1	N.S.
1474.9	-0.171648	0.25181	-0.681655	0.495457	0.972562	ADRBK2	N.S.
10260.3	0.0853146	0.225798	0.377836	0.705552	0.994139	ADRM1	N.S.
4201.94	-0.2919	0.223554	-1.30573	0.191646	0.810227	ADSL	N.S.
2414.99	0.0258257	0.234555	0.110105	0.912326	0.997809	ADSS	N.S.
807.897	-0.388595	0.268554	-1.44699	0.147901	0.738438	ADSSL1	N.S.
0	NA	NA	NA	NA	NA	ADTRP	N.S.
8.1375	6.48299	2.43473	2.66271	0.00775132	0.125052	AEBP1	N.S.
1903.32	0.145381	0.245145	0.593038	0.553155	0.9804	AEBP2	N.S.
6181.69	0.113518	0.2162	0.525061	0.599541	0.984761	AEN	N.S.
22431.9	-0.237605	0.22641	-1.04945	0.293973	0.904069	AES	N.S.
211.342	-0.364912	0.406516	-0.897657	0.369368	0.938639	AF011889.5	N.S.
1.10841	1.82881	4.84903	0.37715	0.706062	NA	AF111168.2	N.S.
14.4687	0.0420659	1.49827	0.0280763	0.977601	0.998628	AF131216.1	N.S.
0.915064	3.37114	4.84575	0.69569	0.486623	NA	AF165138.7	N.S.
3016.63	0.419752	0.259119	1.61992	0.105249	0.636829	AFAP1	N.S.
1687.04	-0.550409	0.264448	-2.08135	0.0374018	0.36973	AFAP1L1	N.S.
549.4	4.72923	0.338997	13.9507	3.11748e-44	2.41916e-41	AFAP1L2	padj<0.05 & Upregulated
1779.88	0.29016	0.28323	1.02447	0.305613	0.910704	AFF1	N.S.
2.2671	1.23145	3.83664	0.320971	0.748232	0.997428	AFF2	N.S.
89.0318	-0.589311	0.678453	-0.86861	0.385061	0.943981	AFF3	N.S.
11721.9	-0.00814324	0.310238	-0.0262484	0.979059	0.998628	AFF4	N.S.
5932.4	0.0825065	0.214839	0.384038	0.70095	0.993485	AFG3L2	N.S.
0	NA	NA	NA	NA	NA	AFM	N.S.
1470.75	-0.241426	0.262947	-0.918152	0.358539	0.937081	AFMID	N.S.
0.915064	3.37114	4.84575	0.69569	0.486623	NA	AFP	N.S.
1710.99	0.430298	0.254472	1.69094	0.0908475	0.593127	AFTPH	N.S.
355.763	0.251712	0.360114	0.69898	0.484564	0.972562	AGA	N.S.
2805.28	0.0059008	0.279756	0.0210927	0.983172	0.998628	AGAP1	N.S.
35.3494	0.0379492	0.908428	0.0417746	0.966678	0.998406	AGAP14P	N.S.
2511.82	-0.666409	0.263621	-2.5279	0.0114746	0.16597	AGAP2	N.S.
4727.51	0.270173	0.230732	1.17094	0.241624	0.862798	AGAP3	N.S.
199.99	0.110532	0.508998	0.217156	0.828087	0.997809	AGAP4	N.S.
67.9103	0.0869945	0.791714	0.109881	0.912504	0.997809	AGAP5	N.S.
501.408	-0.136166	0.3475	-0.391844	0.695174	0.992567	AGAP6	N.S.
193.844	0.263406	0.427005	0.616869	0.537321	0.978637	AGAP9	N.S.
0	NA	NA	NA	NA	NA	AGBL1	N.S.
36.3552	-0.451225	0.880864	-0.512252	0.608475	0.985604	AGBL2	N.S.
63.4488	0.0286414	0.679428	0.0421553	0.966375	0.998406	AGBL3	N.S.
28.3621	-0.65255	1.08464	-0.601627	0.547422	0.979941	AGBL4	N.S.
5625.37	-0.311411	0.232435	-1.33978	0.180317	0.793837	AGBL5	N.S.
42.2972	0.229527	0.855511	0.268292	0.788474	0.997809	AGER	N.S.
4636.19	0.20285	0.215	0.943486	0.345432	0.928813	AGFG1	N.S.
422.139	0.146965	0.322295	0.455997	0.648392	0.987588	AGFG2	N.S.
3167.53	0.0129841	0.223736	0.0580329	0.953722	0.998406	AGGF1	N.S.
1064.3	-0.185102	0.27823	-0.665284	0.505869	0.972562	AGK	N.S.
1741.42	-0.418971	0.29065	-1.4415	0.149445	0.741391	AGL	N.S.
6.81017	0.867933	1.97598	0.439243	0.660486	0.987588	AGMAT	N.S.
6.25648	-2.46873	2.36159	-1.04537	0.295853	0.904461	AGMO	N.S.
3491.02	-0.108663	0.257791	-0.421517	0.673377	0.988818	AGO1	N.S.
4856.11	-0.0593572	0.261961	-0.226588	0.820744	0.997809	AGO2	N.S.
1579.7	0.0459692	0.279176	0.16466	0.869212	0.997809	AGO3	N.S.
1470.65	0.110812	0.253869	0.436494	0.662478	0.987588	AGO4	N.S.
7098.38	-0.390212	0.22618	-1.72523	0.0844855	0.576358	AGPAT1	N.S.
3677.19	-0.0241956	0.215228	-0.112419	0.910492	0.997809	AGPAT2	N.S.
3918.22	0.0585224	0.230692	0.253682	0.799741	0.997809	AGPAT3	N.S.
1599.23	-0.569719	0.242953	-2.34498	0.0190283	0.239125	AGPAT4	N.S.
1458.97	-0.155994	0.245348	-0.635805	0.524903	0.976876	AGPAT5	N.S.
6645.85	-0.00426194	0.208628	-0.0204284	0.983702	0.998628	AGPS	N.S.
0	NA	NA	NA	NA	NA	AGR2	N.S.
0	NA	NA	NA	NA	NA	AGR3	N.S.
33893.6	0.657628	0.263516	2.49559	0.0125747	0.176944	AGRN	N.S.
0	NA	NA	NA	NA	NA	AGRP	N.S.
2.5397	4.83512	3.62962	1.33213	0.182818	0.797375	AGT	N.S.
1773.81	-0.16562	0.260517	-0.635737	0.524948	0.976876	AGTPBP1	N.S.
1.65066	0.484022	3.95427	0.122405	0.902578	0.997809	AGTR1	N.S.
0.686298	2.95897	4.86575	0.608122	0.543107	NA	AGTR2	N.S.
3050.67	-0.0370811	0.239008	-0.155146	0.876706	0.997809	AGTRAP	N.S.
1.75034	4.29229	4.74791	0.904037	0.365976	0.937081	AGXT	N.S.
0	NA	NA	NA	NA	NA	AGXT2	N.S.
6888.78	-0.0252338	0.241046	-0.104685	0.916626	0.997809	AHCTF1	N.S.
27000.8	-0.575833	0.218778	-2.63205	0.00848724	0.134685	AHCY	N.S.
9582.51	1.15172	0.213071	5.40531	6.46946e-08	4.09821e-06	AHCYL1	padj<0.05 & Upregulated
1745.26	-0.256722	0.276315	-0.929092	0.352841	0.933691	AHCYL2	N.S.
1414.17	0.405991	0.26552	1.52904	0.126254	0.692388	AHDC1	N.S.
598.937	-0.189973	0.310772	-0.611294	0.541005	0.979198	AHI1	N.S.
44416	0.139668	0.249764	0.559201	0.576024	0.983281	AHNAK	N.S.
6793.57	1.20214	0.236021	5.09334	3.51807e-07	1.93619e-05	AHNAK2	padj<0.05 & Upregulated
35.0713	0.750363	0.909582	0.824954	0.409398	0.949224	AHR	N.S.
1630.93	0.228776	0.286083	0.799683	0.423895	0.950804	AHRR	N.S.
7385.43	-0.00823729	0.213182	-0.0386397	0.969178	0.998495	AHSA1	N.S.
1953.93	-0.156041	0.270386	-0.577107	0.563867	0.981763	AHSA2	N.S.
4.36604	2.31408	2.40252	0.963186	0.335454	0.927519	AHSG	N.S.
0	NA	NA	NA	NA	NA	AHSP	N.S.
0	NA	NA	NA	NA	NA	AICDA	N.S.
6395.26	-0.0195172	0.211516	-0.0922727	0.926481	0.997809	AIDA	N.S.
0	NA	NA	NA	NA	NA	AIF1	N.S.
564.736	0.0826007	0.345331	0.239193	0.810956	0.997809	AIF1L	N.S.
7040.18	-0.256048	0.213274	-1.20056	0.229922	0.853022	AIFM1	N.S.
55.5578	-0.187058	0.734558	-0.254654	0.798991	0.997809	AIFM2	N.S.
89.7048	-1.01362	0.581322	-1.74365	0.0812197	0.565011	AIFM3	N.S.
1827.76	-0.394621	0.238831	-1.6523	0.0984728	0.616736	AIG1	N.S.
13.6178	-0.871322	1.41623	-0.61524	0.538396	0.978826	AIM1	N.S.
66.933	0.916738	0.674194	1.35975	0.173908	0.782106	AIM1L	N.S.
0.291724	1.66547	4.97737	0.334609	0.73792	NA	AIM2	N.S.
1553.13	0.213872	0.248721	0.859886	0.389852	0.943989	AIMP1	N.S.
1702.03	-0.0837086	0.272222	-0.307501	0.758462	0.997809	AIMP2	N.S.
2547.2	-0.141544	0.237123	-0.596923	0.550559	0.980359	AIP	N.S.
0	NA	NA	NA	NA	NA	AIPL1	N.S.
0	NA	NA	NA	NA	NA	AIRE	N.S.
0	NA	NA	NA	NA	NA	AJ239318.1	N.S.
77.8057	2.45369	0.658024	3.72887	0.000192337	0.00562159	AJAP1	padj<0.05 & Upregulated
4847.47	0.532543	0.214179	2.48644	0.012903	0.179439	AJUBA	N.S.
2819.26	-0.513753	0.24267	-2.11709	0.0342524	0.350108	AK1	N.S.
4588.87	-0.179396	0.226929	-0.790537	0.429214	0.952638	AK2	N.S.
4592.15	-0.0662268	0.226441	-0.292468	0.769928	0.997809	AK3	N.S.
1665.38	0.325555	0.254615	1.27862	0.201033	0.821308	AK4	N.S.
13.1941	1.88361	1.47088	1.2806	0.200335	0.820477	AK5	N.S.
1859.48	0.0932402	0.232119	0.401691	0.687911	0.991203	AK6	N.S.
184.871	-0.25103	0.436787	-0.574719	0.565481	0.982581	AK7	N.S.
65.2742	0.709782	0.679754	1.04417	0.296405	0.904999	AK8	N.S.
379.425	-0.162643	0.42727	-0.380657	0.703458	0.993704	AK9	N.S.
2356.01	-0.0131127	0.246705	-0.0531514	0.957611	0.998406	AKAP1	N.S.
1478.12	0.168069	0.241232	0.696714	0.485982	0.972562	AKAP10	N.S.
2921.12	-0.186535	0.254624	-0.732589	0.463809	0.965569	AKAP11	N.S.
10218.7	0.564839	0.243444	2.3202	0.0203302	0.25002	AKAP12	N.S.
5453.23	0.457439	0.256874	1.78079	0.0749468	0.546091	AKAP13	N.S.
1.22453	-3.68684	4.82755	-0.763709	0.445041	NA	AKAP14	N.S.
1847.54	0.398062	0.272348	1.46159	0.143852	0.73008	AKAP17A	N.S.
2490.71	1.43977	0.229036	6.2862	3.25327e-10	2.79671e-08	AKAP2	padj<0.05 & Upregulated
147.029	0.717808	0.483471	1.4847	0.137624	0.716473	AKAP3	N.S.
0	NA	NA	NA	NA	NA	AKAP4	N.S.
352.067	-0.299235	0.370562	-0.807517	0.419369	0.950804	AKAP5	N.S.
208.883	0.235962	0.455097	0.518487	0.604118	0.985604	AKAP6	N.S.
240.713	0.134723	0.392817	0.342966	0.731624	0.995486	AKAP7	N.S.
1943.92	-0.103518	0.246149	-0.420548	0.674085	0.988855	AKAP8	N.S.
6134.68	0.294449	0.234719	1.25447	0.209671	0.831398	AKAP8L	N.S.
2998.85	-0.0215761	0.247251	-0.087264	0.930462	0.997809	AKAP9	N.S.
1817.97	0.106732	0.234138	0.455849	0.648498	0.987588	AKIP1	N.S.
7504.5	-0.135467	0.215255	-0.629332	0.529131	0.977225	AKIRIN1	N.S.
2159.88	0.315911	0.254549	1.24106	0.214582	0.837712	AKIRIN2	N.S.
451.214	0.147667	0.319133	0.462712	0.643571	0.987588	AKNA	N.S.
0	NA	NA	NA	NA	NA	AKNAD1	N.S.
4810.32	-0.361794	0.239287	-1.51197	0.130542	0.701728	AKR1A1	N.S.
5565.54	-0.183868	0.226501	-0.811778	0.416919	0.950004	AKR1B1	N.S.
16.4978	7.53254	1.98289	3.79877	0.000145416	0.00439933	AKR1B10	padj<0.05 & Upregulated
0	NA	NA	NA	NA	NA	AKR1B15	N.S.
271.131	4.28046	0.475409	9.00375	2.1814e-19	4.62476e-17	AKR1C1	padj<0.05 & Upregulated
397.027	7.42217	0.528594	14.0414	8.703e-45	7.50392e-42	AKR1C2	padj<0.05 & Upregulated
73.6675	5.11918	0.829587	6.17075	6.79673e-10	5.67125e-08	AKR1C3	padj<0.05 & Upregulated
0	NA	NA	NA	NA	NA	AKR1C4	N.S.
0	NA	NA	NA	NA	NA	AKR1D1	N.S.
921.696	-0.548804	0.311942	-1.75932	0.0785239	0.558009	AKR1E2	N.S.
3615.44	-0.339351	0.25051	-1.35464	0.175533	0.785042	AKR7A2	N.S.
17.6712	0.604677	1.21191	0.498945	0.617818	0.986582	AKR7A3	N.S.
8337.64	-0.067991	0.209164	-0.325061	0.745135	0.997348	AKT1	N.S.
10023.1	-0.0695435	0.217404	-0.319881	0.749058	0.997428	AKT1S1	N.S.
6697.48	-0.113121	0.219652	-0.515001	0.606553	0.985604	AKT2	N.S.
4957.65	-0.230755	0.2422	-0.952744	0.34072	0.928781	AKT3	N.S.
1270.09	-0.262784	0.245743	-1.06934	0.284914	0.899088	AKTIP	N.S.
0	NA	NA	NA	NA	NA	AL008723.1	N.S.
12.9379	0.673038	1.5672	0.429451	0.667595	0.987841	AL021546.6	N.S.
0	NA	NA	NA	NA	NA	AL022578.1	N.S.
3.66216	1.50111	2.80186	0.535756	0.592127	0.983802	AL023806.1	N.S.
0	NA	NA	NA	NA	NA	AL023875.1	N.S.
1.39314	0.945142	4.69564	0.201281	0.840479	NA	AL049794.1	N.S.
0	NA	NA	NA	NA	NA	AL049872.1	N.S.
0.239	-1.3429	4.99659	-0.268763	0.788112	NA	AL109927.1	N.S.
0	NA	NA	NA	NA	NA	AL133335.1	N.S.
0	NA	NA	NA	NA	NA	AL133475.1	N.S.
0.252886	-1.39406	4.9898	-0.279383	0.779951	NA	AL135745.1	N.S.
0	NA	NA	NA	NA	NA	AL135842.1	N.S.
2.54937	0.710495	2.98402	0.2381	0.811804	0.997809	AL136097.1	N.S.
0	NA	NA	NA	NA	NA	AL137164.1	N.S.
0	NA	NA	NA	NA	NA	AL137860.1	N.S.
0	NA	NA	NA	NA	NA	AL138706.2	N.S.
0	NA	NA	NA	NA	NA	AL138751.1	N.S.
0	NA	NA	NA	NA	NA	AL139333.1	N.S.
0	NA	NA	NA	NA	NA	AL158839.1	N.S.
0	NA	NA	NA	NA	NA	AL162426.1	N.S.
300.531	0.101418	0.375828	0.269853	0.787273	0.997809	AL354822.1	N.S.
0	NA	NA	NA	NA	NA	AL354828.1	N.S.
0	NA	NA	NA	NA	NA	AL354828.2	N.S.
0	NA	NA	NA	NA	NA	AL356131.3	N.S.
0	NA	NA	NA	NA	NA	AL356135.1	N.S.
0	NA	NA	NA	NA	NA	AL356289.1	N.S.
2.17571	0.315497	3.1843	0.0990791	0.921075	0.997809	AL356585.2	N.S.
2.17571	0.315497	3.1843	0.0990791	0.921075	0.997809	AL356585.3	N.S.
0	NA	NA	NA	NA	NA	AL357140.1	N.S.
9.0338	-1.26578	1.85146	-0.683669	0.494184	0.972562	AL358852.1	N.S.
0	NA	NA	NA	NA	NA	AL360294.1	N.S.
59.9604	0.118573	0.764945	0.155009	0.876814	0.997809	AL365181.2	N.S.
0	NA	NA	NA	NA	NA	AL365202.1	N.S.
0	NA	NA	NA	NA	NA	AL365273.1	N.S.
0	NA	NA	NA	NA	NA	AL445183.1	N.S.
0	NA	NA	NA	NA	NA	AL513412.1	N.S.
611.347	-0.397454	0.365356	-1.08785	0.276659	0.894345	AL513523.1	N.S.
611.347	-0.397454	0.365356	-1.08785	0.276659	0.894345	AL513523.2	N.S.
1253.86	0.116495	0.287842	0.404717	0.685686	0.991203	AL589743.1	N.S.
0	NA	NA	NA	NA	NA	AL590235.1	N.S.
0	NA	NA	NA	NA	NA	AL591806.1	N.S.
16.4079	0.494111	1.2587	0.392556	0.694648	0.992567	AL592183.1	N.S.
0	NA	NA	NA	NA	NA	AL596220.1	N.S.
0	NA	NA	NA	NA	NA	AL645728.1	N.S.
0	NA	NA	NA	NA	NA	AL645922.1	N.S.
0	NA	NA	NA	NA	NA	AL662852.1	N.S.
10.5906	-1.17007	1.55164	-0.754086	0.450798	0.962319	AL928654.7	N.S.
0	NA	NA	NA	NA	NA	AL929561.1	N.S.
2511.8	0.0516794	0.244459	0.211404	0.832572	0.997809	ALAD	N.S.
3922.49	0.224315	0.215972	1.03863	0.298976	0.906621	ALAS1	N.S.
0.291724	1.66547	4.97737	0.334609	0.73792	NA	ALAS2	N.S.
0.228766	1.48804	4.9887	0.298281	0.765489	NA	ALB	N.S.
110572	-0.410762	0.247627	-1.6588	0.097157	0.614163	ALCAM	N.S.
948.48	-0.0824526	0.334647	-0.246387	0.805383	0.997809	ALDH16A1	N.S.
5721.29	-0.28	0.220882	-1.26764	0.204926	0.825949	ALDH18A1	N.S.
78921.1	-0.308446	0.295205	-1.04485	0.296091	0.904592	ALDH1A1	N.S.
5.31351	-1.17956	2.4979	-0.472219	0.636771	0.987588	ALDH1A2	N.S.
1936.45	0.275407	0.233016	1.18192	0.237237	0.860496	ALDH1A3	N.S.
3105.89	0.0352964	0.260409	0.135542	0.892184	0.997809	ALDH1B1	N.S.
0.875172	3.28765	4.84936	0.677955	0.4978	NA	ALDH1L1	N.S.
1037.26	-0.38056	0.299483	-1.27072	0.203827	0.824394	ALDH1L2	N.S.
20.3914	-0.0154281	1.1547	-0.0133611	0.98934	0.998628	ALDH2	N.S.
52.1856	0.0772664	0.748137	0.103278	0.917742	0.997809	ALDH3A1	N.S.
3990.03	0.0838826	0.230797	0.363448	0.716271	0.994885	ALDH3A2	N.S.
962.783	3.18531	0.265809	11.9835	4.33821e-33	1.92369e-30	ALDH3B1	padj<0.05 & Upregulated
1.72779	4.28098	4.26678	1.00333	0.315703	0.916685	ALDH3B2	N.S.
3882.51	-0.302607	0.249367	-1.2135	0.224939	0.849406	ALDH4A1	N.S.
2989.39	-0.381452	0.223297	-1.70827	0.0875856	0.58472	ALDH5A1	N.S.
660.405	0.355294	0.315711	1.12538	0.260428	0.884645	ALDH6A1	N.S.
2760.2	-0.349999	0.261284	-1.33953	0.180397	0.793837	ALDH7A1	N.S.
15.3227	-0.0152459	1.31291	-0.0116122	0.990735	0.99896	ALDH8A1	N.S.
3668.99	-0.0959331	0.216333	-0.443451	0.65744	0.987588	ALDH9A1	N.S.
27307.2	0.000853474	0.223935	0.00381125	0.996959	0.999967	ALDOA	N.S.
3.42056	0.314194	2.92122	0.107556	0.914348	0.997809	ALDOB	N.S.
28.3091	-0.5915	1.04764	-0.564601	0.572345	0.982616	ALDOC	N.S.
1506.44	0.02338	0.244116	0.0957742	0.9237	0.997809	ALG1	N.S.
177.032	-0.44673	0.445097	-1.00367	0.315538	0.916685	ALG10	N.S.
712.158	-0.00531772	0.371726	-0.0143055	0.988586	0.998628	ALG10B	N.S.
666.483	0.055622	0.32273	0.172348	0.863164	0.997809	ALG11	N.S.
2611.45	0.170757	0.235459	0.725209	0.468324	0.968344	ALG12	N.S.
1566.18	-0.0312039	0.237053	-0.131632	0.895275	0.997809	ALG13	N.S.
159.933	0.0807489	0.504103	0.160183	0.872737	0.997809	ALG14	N.S.
3.73972	-0.065163	2.79738	-0.0232943	0.981415	0.998628	ALG1L	N.S.
0	NA	NA	NA	NA	NA	ALG1L2	N.S.
2320.91	0.191983	0.231768	0.828345	0.407475	0.949124	ALG2	N.S.
2156.69	0.0500158	0.250935	0.199318	0.842014	0.997809	ALG3	N.S.
1083.13	0.224816	0.26539	0.847115	0.396931	0.945859	ALG5	N.S.
834.219	0.0289039	0.265528	0.108854	0.913318	0.997809	ALG6	N.S.
866.108	0.0221722	0.270782	0.081882	0.934741	0.997809	ALG8	N.S.
717.495	0.165142	0.309201	0.534091	0.593278	0.983802	ALG9	N.S.
0	NA	NA	NA	NA	NA	ALK	N.S.
722.311	0.0879419	0.281136	0.312809	0.754426	0.997809	ALKBH1	N.S.
1344.83	-0.256915	0.258131	-0.995289	0.319596	0.920272	ALKBH2	N.S.
560.073	0.0382895	0.31944	0.119864	0.904591	0.997809	ALKBH3	N.S.
1321.95	-0.0389033	0.253417	-0.153515	0.877992	0.997809	ALKBH4	N.S.
6291.05	0.0480181	0.227022	0.211513	0.832487	0.997809	ALKBH5	N.S.
735.622	-0.475124	0.31798	-1.49419	0.135125	0.712102	ALKBH6	N.S.
1211.27	-0.497358	0.298023	-1.66886	0.0951453	0.608428	ALKBH7	N.S.
739.536	-0.110409	0.311121	-0.354873	0.722685	0.994885	ALKBH8	N.S.
0.291724	1.66547	4.97737	0.334609	0.73792	NA	ALLC	N.S.
1753.34	0.376701	0.243364	1.54789	0.121648	0.681088	ALMS1	N.S.
1.69809	-4.15906	4.28792	-0.969948	0.332072	0.926207	ALOX12	N.S.
47.5558	-0.411693	0.772539	-0.53291	0.594096	0.983802	ALOX12B	N.S.
10.1133	3.0265	1.7951	1.68598	0.0918005	0.596627	ALOX15	N.S.
2.45356	-4.69315	3.68443	-1.27378	0.202741	0.823087	ALOX15B	N.S.
1.50617	0.46795	4.11467	0.113727	0.909454	0.997809	ALOX5	N.S.
1.20885	3.76715	4.83117	0.779759	0.435533	NA	ALOX5AP	N.S.
96.4129	-0.480628	0.561787	-0.855535	0.392255	0.944762	ALOXE3	N.S.
0.291724	1.66547	4.97737	0.334609	0.73792	NA	ALPI	N.S.
80.1467	2.51145	0.643906	3.90034	9.60574e-05	0.0030715	ALPK1	padj<0.05 & Upregulated
120.415	10.3996	1.56741	6.63488	3.24774e-11	3.19018e-09	ALPK2	padj<0.05 & Upregulated
85.0651	4.10312	0.92726	4.42499	9.64455e-06	0.000393904	ALPK3	padj<0.05 & Upregulated
1883.06	0.89684	0.237008	3.78401	0.00015432	0.0046326	ALPL	padj<0.05 & Upregulated
19.7427	7.79236	1.88797	4.12738	3.66925e-05	0.00128548	ALPP	padj<0.05 & Upregulated
3.1351	3.5649	3.1417	1.1347	0.2565	0.880855	ALPPL2	N.S.
3432.35	0.0114667	0.240164	0.0477456	0.961919	0.998406	ALS2	N.S.
1392.86	0.213205	0.247992	0.859724	0.389941	0.943989	ALS2CL	N.S.
1.52098	1.7387	4.1763	0.416326	0.677172	0.989158	ALS2CR11	N.S.
6.62094	0.163608	1.99988	0.0818088	0.934799	0.997809	ALS2CR12	N.S.
1.25282	-1.78039	4.51483	-0.394342	0.693328	NA	ALX1	N.S.
0.478001	-2.33203	4.89347	-0.47656	0.633676	NA	ALX3	N.S.
595.605	0.272459	0.37596	0.724703	0.468634	0.968412	ALX4	N.S.
5344.65	-0.339345	0.243362	-1.3944	0.163196	0.766028	ALYREF	N.S.
1038.66	-0.12856	0.287741	-0.446792	0.655026	0.987588	AMACR	N.S.
0	NA	NA	NA	NA	NA	AMBN	N.S.
0.228766	1.48804	4.9887	0.298281	0.765489	NA	AMBP	N.S.
3656.3	0.254439	0.227451	1.11865	0.263288	0.886193	AMBRA1	N.S.
2599.35	0.262549	0.243364	1.07883	0.280664	0.89755	AMD1	N.S.
158.833	-0.358683	0.496348	-0.722644	0.469898	0.968412	AMDHD1	N.S.
3197.29	-0.189444	0.260809	-0.726371	0.467611	0.967515	AMDHD2	N.S.
0	NA	NA	NA	NA	NA	AMELX	N.S.
0	NA	NA	NA	NA	NA	AMELY	N.S.
936.966	-0.288917	0.289227	-0.998926	0.317831	0.918743	AMER1	N.S.
1.75034	4.29229	4.74791	0.904037	0.365976	0.937081	AMER2	N.S.
7.32288	2.05419	2.14591	0.957257	0.338437	0.928611	AMER3	N.S.
7831.25	0.030559	0.211072	0.14478	0.884884	0.997809	AMFR	N.S.
266.969	-0.0538884	0.413614	-0.130287	0.89634	0.997809	AMH	N.S.
2.33379	4.70749	4.22762	1.11351	0.26549	0.887914	AMHR2	N.S.
1420.15	0.138826	0.27877	0.497996	0.618487	0.986582	AMIGO1	N.S.
72.1291	1.23826	0.70313	1.76106	0.0782279	0.557508	AMIGO2	N.S.
8.16274	6.5144	2.76732	2.35405	0.0185702	0.235274	AMIGO3	N.S.
833.691	-0.24361	0.268434	-0.907523	0.36413	0.937081	AMMECR1	N.S.
5448.24	0.145608	0.227109	0.641138	0.521433	0.976423	AMMECR1L	N.S.
8.36014	-0.129767	1.76438	-0.0735481	0.94137	0.997809	AMN	N.S.
317.18	-0.266438	0.352738	-0.755344	0.450043	0.962319	AMN1	N.S.
943.64	0.048536	0.397725	0.122034	0.902872	0.997809	AMOT	N.S.
4762.89	0.640426	0.246112	2.60217	0.00926363	0.142101	AMOTL1	N.S.
8590.71	0.924988	0.210287	4.3987	1.08902e-05	0.000437866	AMOTL2	padj<0.05 & Upregulated
0	NA	NA	NA	NA	NA	AMPD1	N.S.
3648.54	-0.113727	0.256204	-0.443893	0.65712	0.987588	AMPD2	N.S.
30.0306	2.42044	1.03748	2.333	0.0196481	0.244412	AMPD3	N.S.
120.598	-0.203652	0.534851	-0.380764	0.703378	0.993704	AMPH	N.S.
282.955	-0.59043	0.441126	-1.33846	0.180747	0.793837	AMT	N.S.
0	NA	NA	NA	NA	NA	AMTN	N.S.
0	NA	NA	NA	NA	NA	AMY1A	N.S.
0.244905	-1.36065	4.99533	-0.272386	0.785326	NA	AMY1B	N.S.
0	NA	NA	NA	NA	NA	AMY1C	N.S.
2.45821	4.74499	3.73442	1.27061	0.203867	0.824394	AMY2A	N.S.
319.079	-0.844107	0.421664	-2.00185	0.0453011	0.412844	AMY2B	N.S.
5.85303	0.774296	2.33813	0.33116	0.740524	0.997179	AMZ1	N.S.
5354.11	-0.260159	0.219139	-1.18719	0.235154	0.858322	AMZ2	N.S.
4082.17	-0.0935225	0.238999	-0.391308	0.695569	0.992567	ANAPC1	N.S.
489.632	0.260024	0.310831	0.836545	0.402849	0.946904	ANAPC10	N.S.
3724.08	-0.115014	0.245517	-0.468455	0.639459	0.987588	ANAPC11	N.S.
1347.94	0.316594	0.288936	1.09572	0.273199	0.891142	ANAPC13	N.S.
857.336	-0.55428	0.309489	-1.79095	0.0733007	0.538379	ANAPC15	N.S.
3142.82	0.00365554	0.232634	0.0157137	0.987463	0.998628	ANAPC16	N.S.
2839.08	-0.0536046	0.242918	-0.220669	0.82535	0.997809	ANAPC2	N.S.
1171.04	-0.0512598	0.256644	-0.199731	0.841691	0.997809	ANAPC4	N.S.
5329.15	-0.166798	0.228433	-0.730181	0.465279	0.966168	ANAPC5	N.S.
3559.81	-0.117937	0.231934	-0.508495	0.611106	0.985604	ANAPC7	N.S.
1771.41	-0.714551	0.290716	-2.4579	0.0139753	0.190427	ANG	N.S.
2072.95	0.123953	0.233284	0.531339	0.595184	0.983942	ANGEL1	N.S.
1736.25	-0.0245752	0.240968	-0.101985	0.918768	0.997809	ANGEL2	N.S.
870.944	-0.0671996	0.280961	-0.239177	0.810968	0.997809	ANGPT1	N.S.
13.3466	-0.398219	1.43029	-0.278419	0.780691	0.997809	ANGPT2	N.S.
0	NA	NA	NA	NA	NA	ANGPT4	N.S.
373.35	-1.00181	0.455725	-2.19827	0.0279299	0.306558	ANGPTL1	N.S.
1.67065	-1.38275	3.91709	-0.353004	0.724085	0.994885	ANGPTL2	N.S.
0	NA	NA	NA	NA	NA	ANGPTL3	N.S.
437.742	2.32147	0.357368	6.49602	8.24715e-11	7.80462e-09	ANGPTL4	padj<0.05 & Upregulated
0	NA	NA	NA	NA	NA	ANGPTL5	N.S.
29.0339	-1.34341	0.983211	-1.36635	0.171829	0.777884	ANGPTL6	N.S.
72.9394	5.01416	0.814947	6.15274	7.61554e-10	6.25361e-08	ANGPTL7	padj<0.05 & Upregulated
0.478001	-2.33203	4.89347	-0.47656	0.633676	NA	ANGPTL8	N.S.
0	NA	NA	NA	NA	NA	ANHX	N.S.
430.619	0.833771	0.421935	1.97607	0.0481472	0.42773	ANK1	N.S.
1608.09	-0.0487069	0.276554	-0.176121	0.860199	0.997809	ANK2	N.S.
1812.04	-0.0816515	0.231888	-0.352116	0.724751	0.994885	ANK3	N.S.
141.238	0.239006	0.472635	0.505689	0.613075	0.985696	ANKAR	N.S.
296.433	-0.354228	0.358618	-0.987757	0.323272	0.921429	ANKDD1A	N.S.
4.58307	0.603274	2.30561	0.261654	0.793588	0.997809	ANKDD1B	N.S.
327.978	-0.134176	0.390517	-0.343586	0.731158	0.995486	ANKEF1	N.S.
0	NA	NA	NA	NA	NA	ANKFN1	N.S.
6511.52	0.274381	0.235654	1.16434	0.244287	0.866716	ANKFY1	N.S.
2010.66	-0.185793	0.236222	-0.786518	0.431564	0.954249	ANKH	N.S.
3674.84	0.168813	0.289506	0.583107	0.559821	0.981358	ANKHD1	N.S.
2090.75	0.390791	0.248052	1.57544	0.115155	0.662173	ANKHD1-EIF4EBP3	N.S.
4329.74	0.320288	0.236184	1.35609	0.175069	0.7846	ANKIB1	N.S.
11.3753	-0.107593	1.8701	-0.0575331	0.954121	0.998406	ANKK1	N.S.
38.7592	-0.0228253	1.11653	-0.0204431	0.98369	0.998628	ANKLE1	N.S.
5540.44	0.183423	0.21698	0.845344	0.397919	0.946644	ANKLE2	N.S.
291.12	0.274351	0.403891	0.67927	0.496967	0.972562	ANKMY1	N.S.
1212.91	0.0256669	0.288126	0.0890825	0.929016	0.997809	ANKMY2	N.S.
597.885	0.322806	0.29225	1.10455	0.269353	0.890324	ANKRA2	N.S.
32572.5	0.120669	0.256732	0.470019	0.638342	0.987588	ANKRD1	N.S.
1736.56	0.69972	0.27982	2.50061	0.0123979	0.175725	ANKRD10	N.S.
9302.34	0.484844	0.253808	1.91028	0.0560971	0.465967	ANKRD11	N.S.
1794.82	0.415228	0.345434	1.20205	0.229345	0.852355	ANKRD12	N.S.
1594.54	0.202947	0.313906	0.646521	0.517942	0.975962	ANKRD13A	N.S.
6844.41	-0.554735	0.227905	-2.43407	0.0149303	0.201319	ANKRD13B	N.S.
1706.43	0.157012	0.248	0.633113	0.52666	0.976876	ANKRD13C	N.S.
1885.53	-0.165495	0.231588	-0.714609	0.47485	0.970189	ANKRD13D	N.S.
577.615	-0.28395	0.340085	-0.834939	0.403752	0.946904	ANKRD16	N.S.
5761.32	0.0693052	0.264345	0.262177	0.793185	0.997809	ANKRD17	N.S.
296.837	1.0128	0.394855	2.56499	0.0103178	0.154122	ANKRD18A	N.S.
190.218	-0.195973	0.49538	-0.395601	0.692399	0.992431	ANKRD18B	N.S.
15.1713	4.60398	1.73153	2.65891	0.00783939	0.12608	ANKRD2	N.S.
19.0046	-0.127978	1.2716	-0.100643	0.919834	0.997809	ANKRD20A1	N.S.
37.8107	0.489292	0.854901	0.572337	0.567094	0.982581	ANKRD20A2	N.S.
5.6513	0.153701	2.43888	0.0630209	0.94975	0.997992	ANKRD20A3	N.S.
33.1932	-0.420466	0.904189	-0.46502	0.641917	0.987588	ANKRD20A4	N.S.
0	NA	NA	NA	NA	NA	ANKRD22	N.S.
162.262	-0.201341	0.456823	-0.440742	0.6594	0.987588	ANKRD23	N.S.
1911.68	-0.668066	0.266746	-2.5045	0.0122625	0.1746	ANKRD24	N.S.
857.56	0.247931	0.283612	0.874193	0.382013	0.943981	ANKRD26	N.S.
2624.74	-0.0792043	0.226992	-0.34893	0.727142	0.994885	ANKRD27	N.S.
2780	-0.134054	0.244498	-0.548284	0.583497	0.983735	ANKRD28	N.S.
313.583	0.418089	0.373742	1.11866	0.263287	0.886193	ANKRD29	N.S.
0	NA	NA	NA	NA	NA	ANKRD30A	N.S.
0.875172	3.28765	4.84936	0.677955	0.4978	NA	ANKRD30B	N.S.
0	NA	NA	NA	NA	NA	ANKRD30BL	N.S.
69.7567	-0.413033	0.766749	-0.538681	0.590107	0.983735	ANKRD31	N.S.
0	NA	NA	NA	NA	NA	ANKRD33	N.S.
1374.91	2.33155	0.246664	9.45231	3.31435e-21	8.03729e-19	ANKRD33B	padj<0.05 & Upregulated
354.234	-0.111447	0.366419	-0.304151	0.761013	0.997809	ANKRD34A	N.S.
488.067	-0.411853	0.339159	-1.21434	0.224619	0.849123	ANKRD34B	N.S.
0.686298	2.95897	4.86575	0.608122	0.543107	NA	ANKRD34C	N.S.
4.35015	-1.94169	2.9921	-0.648938	0.516378	0.975163	ANKRD35	N.S.
247.852	0.241227	0.382935	0.629944	0.528731	0.977225	ANKRD36	N.S.
222.266	-0.7631	0.419366	-1.81965	0.0688118	0.524442	ANKRD36B	N.S.
144.729	-0.119962	0.499971	-0.239937	0.810379	0.997809	ANKRD36C	N.S.
136.967	0.0961019	0.506286	0.189818	0.849452	0.997809	ANKRD37	N.S.
859.891	-0.349956	0.282554	-1.23854	0.215514	0.838291	ANKRD39	N.S.
3737.15	-0.0946132	0.220119	-0.429828	0.667321	0.987841	ANKRD40	N.S.
862.936	-0.119637	0.291946	-0.409793	0.681958	0.990732	ANKRD42	N.S.
486.098	0.497672	0.348784	1.42688	0.153615	0.749709	ANKRD44	N.S.
1.41342	-1.04529	4.67287	-0.223694	0.822995	NA	ANKRD45	N.S.
1038.42	0.314104	0.26822	1.17107	0.241571	0.862798	ANKRD46	N.S.
686.611	0.303281	0.281068	1.07903	0.280574	0.89755	ANKRD49	N.S.
3343.39	-0.201326	0.282932	-0.711573	0.476729	0.970189	ANKRD50	N.S.
8133.78	-0.11892	0.214348	-0.554801	0.579031	0.983572	ANKRD52	N.S.
0.583448	2.6981	4.88162	0.552705	0.580466	NA	ANKRD53	N.S.
1835.66	0.232829	0.244411	0.952614	0.340786	0.928781	ANKRD54	N.S.
0	NA	NA	NA	NA	NA	ANKRD55	N.S.
1548.86	0.0539866	0.262662	0.205537	0.837153	0.997809	ANKRD6	N.S.
0	NA	NA	NA	NA	NA	ANKRD60	N.S.
2.48036	0.604376	3.30263	0.182998	0.854799	0.997809	ANKRD61	N.S.
0	NA	NA	NA	NA	NA	ANKRD62	N.S.
0.478001	-2.33203	4.89347	-0.47656	0.633676	NA	ANKRD63	N.S.
8.71306	1.47079	1.71402	0.858092	0.390842	0.944409	ANKRD65	N.S.
0	NA	NA	NA	NA	NA	ANKRD66	N.S.
11.5296	-0.102215	1.4877	-0.0687065	0.945223	0.997937	ANKRD7	N.S.
2970.73	0.110292	0.260142	0.42397	0.671588	0.988296	ANKRD9	N.S.
3101.3	0.241159	0.270184	0.892572	0.372086	0.940087	ANKS1A	N.S.
279.141	-0.482728	0.387707	-1.24509	0.2131	0.83726	ANKS1B	N.S.
766.677	0.211001	0.281617	0.749246	0.453709	0.962486	ANKS3	N.S.
0	NA	NA	NA	NA	NA	ANKS4B	N.S.
3425.52	-0.037604	0.223269	-0.168425	0.866249	0.997809	ANKS6	N.S.
1.27847	3.84478	4.82854	0.796261	0.425881	NA	ANKUB1	N.S.
1486.42	0.524886	0.249618	2.10275	0.0354873	0.357415	ANKZF1	N.S.
1722.91	-0.883188	0.298966	-2.95415	0.00313535	0.0601491	ANLN	N.S.
5.18157	3.42427	2.57219	1.33127	0.183101	0.797565	ANO1	N.S.
2255.43	0.241853	0.228915	1.05652	0.29073	0.901402	ANO10	N.S.
0.739885	3.04748	4.86891	0.625905	0.531377	NA	ANO2	N.S.
2.15092	-0.00210864	3.52447	-0.000598285	0.999523	0.999967	ANO3	N.S.
0	NA	NA	NA	NA	NA	ANO4	N.S.
26.6189	-0.296709	1.04647	-0.283532	0.776769	0.997809	ANO5	N.S.
4986.72	0.0346553	0.252523	0.137236	0.890844	0.997809	ANO6	N.S.
202.141	-0.21955	0.444402	-0.494034	0.621282	0.986921	ANO7	N.S.
2995.82	-0.646472	0.26652	-2.4256	0.0152831	0.20483	ANO8	N.S.
32.1772	1.87833	1.01341	1.85347	0.0638154	0.502242	ANO9	N.S.
4839.52	-0.355317	0.346029	-1.02684	0.304494	0.910704	ANOS1	N.S.
7317.88	-0.399694	0.232283	-1.72072	0.0853013	0.57812	ANP32A	N.S.
5149.09	-0.148192	0.215257	-0.688441	0.491175	0.972562	ANP32B	N.S.
0.48981	-2.36404	4.89111	-0.483334	0.628859	NA	ANP32D	N.S.
3657.12	-0.319996	0.21893	-1.46164	0.14384	0.73008	ANP32E	N.S.
8.37279	1.45267	2.34115	0.620495	0.534932	0.977643	ANPEP	N.S.
2075.82	0.487854	0.23747	2.05438	0.0399388	0.380743	ANTXR1	N.S.
10206.5	-0.223388	0.341865	-0.65344	0.513473	0.973551	ANTXR2	N.S.
9.04182	2.21102	1.99121	1.11039	0.266832	0.888263	ANTXRL	N.S.
24255.6	-0.0706507	0.314754	-0.224463	0.822397	0.997809	ANXA1	N.S.
0	NA	NA	NA	NA	NA	ANXA10	N.S.
8753.58	-0.145306	0.209591	-0.693285	0.488131	0.972562	ANXA11	N.S.
1.66066	0.465937	4.34605	0.107209	0.914623	0.997809	ANXA13	N.S.
53612	0.279766	0.2549	1.09755	0.272401	0.890926	ANXA2	N.S.
263.857	0.0323795	0.40079	0.0807891	0.93561	0.997809	ANXA2R	N.S.
12.0269	5.61498	2.0887	2.68827	0.00718234	0.118348	ANXA3	N.S.
10106.5	0.421875	0.213702	1.97413	0.0483672	0.429193	ANXA4	N.S.
14506.6	0.23936	0.214597	1.11539	0.264681	0.887914	ANXA5	N.S.
13344.4	-0.158964	0.22623	-0.702668	0.482263	0.971726	ANXA6	N.S.
4653.81	0.00960832	0.218392	0.0439957	0.964908	0.998406	ANXA7	N.S.
42.9267	7.43948	1.66969	4.45561	8.36568e-06	0.000349961	ANXA8	padj<0.05 & Upregulated
58.5383	1.40804	0.708697	1.9868	0.0469445	0.421054	ANXA8L1	N.S.
42.801	1.06553	0.807378	1.31974	0.186922	0.803688	ANXA9	N.S.
0	NA	NA	NA	NA	NA	AOAH	N.S.
7.11811	6.31612	2.52934	2.49714	0.0125198	0.176643	AOC1	N.S.
782.41	0.863618	0.457428	1.88799	0.0590277	0.481403	AOC2	N.S.
258.363	1.01428	1.38396	0.732878	0.463633	0.965406	AOC3	N.S.
38.0149	5.25122	1.11176	4.72334	2.32003e-06	0.000110223	AOX1	padj<0.05 & Upregulated
16.2133	-0.962666	1.70608	-0.564257	0.572579	0.982795	AP000275.65	N.S.
3.22188	5.17021	3.33961	1.54815	0.121586	0.681088	AP000295.9	N.S.
0	NA	NA	NA	NA	NA	AP000304.12	N.S.
0	NA	NA	NA	NA	NA	AP000322.53	N.S.
0	NA	NA	NA	NA	NA	AP000349.1	N.S.
0	NA	NA	NA	NA	NA	AP000349.2	N.S.
21.0723	1.49829	1.46043	1.02592	0.304928	0.910704	AP000350.10	N.S.
0	NA	NA	NA	NA	NA	AP000351.1	N.S.
0	NA	NA	NA	NA	NA	AP000687.1	N.S.
0	NA	NA	NA	NA	NA	AP000721.4	N.S.
13.0172	-7.09937	2.46323	-2.88215	0.00394977	0.0730926	AP000769.1	N.S.
1.54088	-0.755859	4.08361	-0.185096	0.853154	0.997809	AP000866.1	N.S.
0	NA	NA	NA	NA	NA	AP001888.1	N.S.
1.52565	2.89463	4.60839	0.628122	0.529924	0.977225	AP002884.2	N.S.
0	NA	NA	NA	NA	NA	AP002962.1	N.S.
291.397	-0.707838	0.459194	-1.54148	0.1232	0.683718	AP003419.11	N.S.
0	NA	NA	NA	NA	NA	AP005242.1	N.S.
31.7188	0.269782	0.970019	0.27812	0.78092	0.997809	AP006285.1	N.S.
31.7188	0.269782	0.970019	0.27812	0.78092	0.997809	AP006285.2	N.S.
2087.61	0.213342	0.243843	0.874916	0.381619	0.943981	AP1AR	N.S.
6446.04	-0.0989415	0.21229	-0.466067	0.641167	0.987588	AP1B1	N.S.
6296.33	-0.0432505	0.244851	-0.17664	0.859791	0.997809	AP1G1	N.S.
1122.24	0.228316	0.315073	0.724646	0.468669	0.968412	AP1G2	N.S.
7535.09	0.00535384	0.208136	0.0257228	0.979478	0.998628	AP1M1	N.S.
514.359	-0.752532	0.30463	-2.47032	0.0134994	0.18508	AP1M2	N.S.
7329.41	0.0707653	0.21273	0.332653	0.739396	0.996981	AP1S1	N.S.
3329.14	-0.00911721	0.319471	-0.0285385	0.977233	0.998628	AP1S2	N.S.
819.2	-0.00753958	0.275074	-0.0274093	0.978133	0.998628	AP1S3	N.S.
6549.42	-0.0387668	0.218043	-0.177794	0.858885	0.997809	AP2A1	N.S.
8951.48	-0.0240497	0.21114	-0.113904	0.909314	0.997809	AP2A2	N.S.
27542.6	-0.162723	0.213447	-0.762355	0.445848	0.962237	AP2B1	N.S.
21723.8	0.102764	0.204782	0.501822	0.615792	0.986401	AP2M1	N.S.
4419.94	-0.131453	0.25544	-0.514614	0.606823	0.985604	AP2S1	N.S.
5114.03	-0.224867	0.224258	-1.00272	0.315997	0.916685	AP3B1	N.S.
517.223	0.0830962	0.304585	0.272818	0.784993	0.997809	AP3B2	N.S.
22778.1	-0.0825724	0.202775	-0.407211	0.683853	0.991157	AP3D1	N.S.
3699.64	-0.231171	0.237304	-0.974156	0.329979	0.924752	AP3M1	N.S.
1141.71	-0.12408	0.265119	-0.468016	0.639773	0.987588	AP3M2	N.S.
2535.02	-0.181222	0.226977	-0.798416	0.424629	0.950804	AP3S1	N.S.
2132.06	0.252885	0.244003	1.0364	0.300014	0.907686	AP3S2	N.S.
1030.37	-0.215854	0.258563	-0.83482	0.403819	0.946904	AP4B1	N.S.
962.484	0.22505	0.308934	0.728472	0.466325	0.966834	AP4E1	N.S.
1266.36	-0.576835	0.31376	-1.83846	0.0659949	0.51289	AP4M1	N.S.
655.489	0.0004717	0.285938	0.00164966	0.998684	0.999967	AP4S1	N.S.
4024.95	-0.130345	0.216235	-0.602794	0.546646	0.979443	AP5B1	N.S.
1651.11	0.0933288	0.253878	0.367614	0.713161	0.994885	AP5M1	N.S.
1089.31	0.101516	0.260581	0.389575	0.696851	0.993016	AP5S1	N.S.
4461.22	0.105048	0.229436	0.457854	0.647057	0.987588	AP5Z1	N.S.
3423.05	-0.339294	0.233813	-1.45113	0.146743	0.73571	APAF1	N.S.
1121.08	0.0680441	0.35812	0.190004	0.849306	0.997809	APBA1	N.S.
3398.1	-0.133465	0.223919	-0.596042	0.551147	0.980359	APBA2	N.S.
1538.03	-0.092084	0.256156	-0.359484	0.719233	0.994885	APBA3	N.S.
4299.8	-0.108898	0.219099	-0.497027	0.61917	0.986657	APBB1	N.S.
0.48981	-2.36404	4.89111	-0.483334	0.628859	NA	APBB1IP	N.S.
8373.4	-0.0445003	0.231542	-0.192191	0.847593	0.997809	APBB2	N.S.
687.431	-0.144834	0.286009	-0.506398	0.612578	0.985696	APBB3	N.S.
5390.91	0.0875224	0.3284	0.266511	0.789846	0.997809	APC	N.S.
5499.45	-0.498765	0.280284	-1.7795	0.0751586	0.547121	APC2	N.S.
1.87504	-4.30172	4.11213	-1.04611	0.295512	0.904069	APCDD1	N.S.
1.45862	4.02844	4.82353	0.835164	0.403625	NA	APCDD1L	N.S.
0.244905	-1.36065	4.99533	-0.272386	0.785326	NA	APCS	N.S.
3584.8	-0.576748	0.321071	-1.79633	0.0724428	0.53565	APEH	N.S.
197.562	-0.909003	0.513707	-1.7695	0.0768108	0.55269	APELA	N.S.
9076.54	-0.280854	0.218209	-1.28709	0.198063	0.817349	APEX1	N.S.
1360.31	0.0630951	0.267918	0.235502	0.813819	0.997809	APEX2	N.S.
11208.9	0.00807867	0.219057	0.0368793	0.970581	0.99859	APH1A	N.S.
744.821	0.234075	0.284898	0.82161	0.411299	0.949224	APH1B	N.S.
7922.83	0.0768912	0.224623	0.342313	0.732116	0.995486	API5	N.S.
613.239	-0.136453	0.308059	-0.442943	0.657807	0.987588	APIP	N.S.
531.896	0.0847068	0.306241	0.276602	0.782086	0.997809	APITD1	N.S.
20.2625	0.833322	1.24318	0.670317	0.502656	0.972562	APITD1-CORT	N.S.
431.8	-0.0410827	0.315705	-0.13013	0.896463	0.997809	APLF	N.S.
33.0306	-0.309834	0.966601	-0.32054	0.748559	0.997428	APLN	N.S.
0	NA	NA	NA	NA	NA	APLNR	N.S.
11089	-0.658272	0.243871	-2.69927	0.00694927	0.114981	APLP1	N.S.
38537.9	0.269681	0.202025	1.33489	0.181912	0.796115	APLP2	N.S.
7531.82	0.0276091	0.212021	0.130219	0.896393	0.997809	APMAP	N.S.
362.583	6.99731	0.569853	12.2792	1.1721e-34	5.80832e-32	APOA1	padj<0.05 & Upregulated
7222.91	-0.396603	0.250921	-1.58059	0.113972	0.659702	APOA1BP	N.S.
1.40007	0.519534	4.27343	0.121573	0.903237	NA	APOA2	N.S.
0.228766	1.48804	4.9887	0.298281	0.765489	NA	APOA4	N.S.
0.717001	-2.91647	4.85752	-0.600402	0.548238	NA	APOA5	N.S.
0	NA	NA	NA	NA	NA	APOB	N.S.
0	NA	NA	NA	NA	NA	APOBEC1	N.S.
3.81955	1.10038	2.81635	0.39071	0.696012	0.992567	APOBEC2	N.S.
0	NA	NA	NA	NA	NA	APOBEC3A	N.S.
28.1976	3.59462	1.24726	2.88202	0.00395133	0.0730926	APOBEC3B	N.S.
298.888	4.91741	0.467482	10.5189	7.0678e-26	2.38461e-23	APOBEC3C	padj<0.05 & Upregulated
6.68875	6.22259	2.5956	2.39736	0.0165136	0.216447	APOBEC3D	N.S.
806.114	0.525453	0.267876	1.96155	0.0498144	0.434581	APOBEC3F	N.S.
9.98237	5.46123	2.16017	2.52815	0.0114665	0.16597	APOBEC3G	N.S.
20.471	3.69248	1.40522	2.62769	0.00859662	0.136004	APOBEC3H	N.S.
0	NA	NA	NA	NA	NA	APOBEC4	N.S.
36.8948	1.13233	0.874137	1.29537	0.195192	0.813734	APOBR	N.S.
495.464	-0.851304	0.401755	-2.11896	0.0340936	0.349263	APOC1	N.S.
0	NA	NA	NA	NA	NA	APOC2	N.S.
4.96502	5.80354	2.81423	2.06222	0.0391873	0.378537	APOC3	N.S.
0	NA	NA	NA	NA	NA	APOC4	N.S.
1.1669	3.70506	4.83322	0.766582	0.44333	NA	APOC4-APOC2	N.S.
3.5642	3.88753	3.00607	1.29322	0.195933	0.815092	APOD	N.S.
43840.4	-0.555265	0.314679	-1.76454	0.0776405	0.555577	APOE	N.S.
0	NA	NA	NA	NA	NA	APOF	N.S.
0	NA	NA	NA	NA	NA	APOH	N.S.
790.453	7.80878	0.556583	14.0299	1.02328e-44	8.35856e-42	APOL1	padj<0.05 & Upregulated
4028.32	0.895488	0.237569	3.76938	0.000163653	0.00487504	APOL2	padj<0.05 & Upregulated
75.3542	9.72502	1.58359	6.14112	8.19442e-10	6.6585e-08	APOL3	padj<0.05 & Upregulated
20.7668	7.86379	1.89353	4.15298	3.28174e-05	0.00116551	APOL4	padj<0.05 & Upregulated
0	NA	NA	NA	NA	NA	APOL5	N.S.
246.029	6.97425	0.690155	10.1053	5.23139e-24	1.59198e-21	APOL6	padj<0.05 & Upregulated
110.599	0.411669	0.530666	0.775759	0.437891	0.957857	APOLD1	N.S.
19.5206	-0.621406	1.15649	-0.537319	0.591047	0.983735	APOM	N.S.
846.765	-0.414286	0.2758	-1.50212	0.133065	0.708767	APOO	N.S.
1616.3	-0.0752288	0.277284	-0.271306	0.786156	0.997809	APOOL	N.S.
1518.68	-0.0438357	0.241513	-0.181505	0.855971	0.997809	APOPT1	N.S.
56718.3	0.310922	0.19985	1.55578	0.119761	0.674802	APP	N.S.
4641.51	0.126416	0.268456	0.470902	0.637711	0.987588	APPBP2	N.S.
3784.09	-0.0510683	0.236907	-0.215563	0.829329	0.997809	APPL1	N.S.
1090.11	-0.0643944	0.269565	-0.238883	0.811196	0.997809	APPL2	N.S.
3477.09	-0.665722	0.307207	-2.16702	0.0302335	0.326303	APRT	N.S.
1684.6	0.193187	0.23698	0.815201	0.414957	0.949453	APTX	N.S.
125.965	4.59981	0.623713	7.37487	1.64502e-13	2.09268e-11	AQP1	padj<0.05 & Upregulated
0.244905	-1.36065	4.99533	-0.272386	0.785326	NA	AQP10	N.S.
285.449	-0.0957094	0.36792	-0.260137	0.794758	0.997809	AQP11	N.S.
0	NA	NA	NA	NA	NA	AQP12A	N.S.
0	NA	NA	NA	NA	NA	AQP12B	N.S.
0.875172	3.28765	4.84936	0.677955	0.4978	NA	AQP2	N.S.
20.5576	6.37522	1.8731	3.40357	0.000665117	0.0163591	AQP3	padj<0.05 & Upregulated
0	NA	NA	NA	NA	NA	AQP4	N.S.
1.72826	4.28135	4.26633	1.00352	0.315609	0.916685	AQP5	N.S.
17.8263	-0.590044	1.42909	-0.41288	0.679695	0.989634	AQP6	N.S.
1.69074	4.23799	4.31059	0.983157	0.32553	0.922997	AQP7	N.S.
2.76915	4.9604	3.50698	1.41443	0.157234	0.756312	AQP8	N.S.
0.291724	1.66547	4.97737	0.334609	0.73792	NA	AQP9	N.S.
3645.78	-0.0284399	0.223342	-0.127338	0.898673	0.997809	AQR	N.S.
620.999	-0.226812	0.305126	-0.743337	0.457277	0.963432	AR	N.S.
4949.65	-0.0167663	0.214778	-0.0780636	0.937777	0.997809	ARAF	N.S.
7870.2	0.0303886	0.213481	0.142348	0.886805	0.997809	ARAP1	N.S.
912.633	0.310612	0.29516	1.05235	0.292638	0.904009	ARAP2	N.S.
5.1123	5.84444	2.78272	2.10026	0.0357059	0.357758	ARAP3	N.S.
232.911	3.27813	0.457419	7.16659	7.68882e-13	9.3961e-11	ARC	padj<0.05 & Upregulated
10958	-0.037058	0.209707	-0.176714	0.859733	0.997809	ARCN1	N.S.
10.2286	0.576111	1.66819	0.34535	0.729831	0.995429	AREG	N.S.
4451.93	0.126631	0.250333	0.505849	0.612963	0.985696	AREL1	N.S.
32851.4	0.00697645	0.200795	0.0347441	0.972284	0.998628	ARF1	N.S.
16016	-0.305232	0.233035	-1.30981	0.190259	0.808391	ARF3	N.S.
13426.9	-0.127444	0.205276	-0.620839	0.534705	0.977643	ARF4	N.S.
10184.2	-0.450772	0.257744	-1.74891	0.0803062	0.562766	ARF5	N.S.
4879.3	0.336549	0.21435	1.57009	0.116394	0.66462	ARF6	N.S.
11007.7	-0.0529429	0.206895	-0.255893	0.798033	0.997809	ARFGAP1	N.S.
3944.34	0.0698793	0.222934	0.313452	0.753937	0.997809	ARFGAP2	N.S.
3453.36	-0.0592663	0.218606	-0.271111	0.786306	0.997809	ARFGAP3	N.S.
5586.28	-0.223298	0.220677	-1.01188	0.311595	0.915037	ARFGEF1	N.S.
2211.94	0.119319	0.271181	0.439996	0.65994	0.987588	ARFGEF2	N.S.
1712.19	0.16482	0.272553	0.604727	0.545361	0.979198	ARFGEF3	N.S.
2018.33	0.0410847	0.234619	0.175112	0.860992	0.997809	ARFIP1	N.S.
5119.4	0.0833587	0.220729	0.377652	0.705689	0.994139	ARFIP2	N.S.
2248.72	-0.210563	0.255622	-0.823728	0.410094	0.949224	ARFRP1	N.S.
1.47851	-3.94373	4.57782	-0.861488	0.388969	0.943989	ARG1	N.S.
102.122	-0.153592	0.54434	-0.282161	0.77782	0.997809	ARG2	N.S.
0	NA	NA	NA	NA	NA	ARGFX	N.S.
1629.87	-0.28701	0.267804	-1.07172	0.283847	0.898706	ARGLU1	N.S.
5524.95	-0.150751	0.210876	-0.714879	0.474684	0.970189	ARHGAP1	N.S.
938.023	-0.13386	0.260844	-0.513181	0.607824	0.985604	ARHGAP10	N.S.
892.81	-0.901457	0.326736	-2.75897	0.00579832	0.0994364	ARHGAP11A	N.S.
91.123	-1.61822	0.686359	-2.35769	0.0183893	0.233744	ARHGAP11B	N.S.
1645.53	0.227652	0.269918	0.843411	0.398999	0.946644	ARHGAP12	N.S.
4.97226	0.947766	2.24159	0.42281	0.672434	0.988296	ARHGAP15	N.S.
4177.89	-0.0301533	0.221084	-0.136388	0.891514	0.997809	ARHGAP17	N.S.
741.322	-0.980385	0.419182	-2.33881	0.0193455	0.241741	ARHGAP18	N.S.
1299.66	-0.475665	0.287651	-1.65362	0.0982048	0.616736	ARHGAP19	N.S.
2.54053	-1.77739	3.35169	-0.530297	0.595906	0.984369	ARHGAP19-SLIT1	N.S.
18.5459	0.138682	1.23961	0.111875	0.910923	0.997809	ARHGAP20	N.S.
3295.15	0.410069	0.28434	1.44218	0.149252	0.741391	ARHGAP21	N.S.
328.287	-0.113028	0.355547	-0.317899	0.750561	0.997705	ARHGAP22	N.S.
5125.23	0.258397	0.223143	1.15798	0.246871	0.87177	ARHGAP23	N.S.
13.8081	-2.64378	1.55732	-1.69764	0.0895754	0.590574	ARHGAP24	N.S.
0.291724	1.66547	4.97737	0.334609	0.73792	NA	ARHGAP25	N.S.
595.32	0.344313	0.327859	1.05019	0.293632	0.904069	ARHGAP26	N.S.
2523.56	0.454946	0.240849	1.88893	0.0589014	0.480626	ARHGAP27	N.S.
13.1417	0.951322	1.65534	0.574699	0.565495	0.982581	ARHGAP28	N.S.
759.747	6.32945	0.37699	16.7895	2.91484e-63	5.02648e-60	ARHGAP29	padj<0.05 & Upregulated
77.8712	0.84023	0.627218	1.33961	0.180371	0.793837	ARHGAP30	N.S.
206.179	0.310095	0.464236	0.667968	0.504154	0.972562	ARHGAP31	N.S.
2603.35	0.112531	0.313743	0.358671	0.719841	0.994885	ARHGAP32	N.S.
957.214	-0.594613	0.322226	-1.84533	0.0649898	0.508388	ARHGAP33	N.S.
7296.76	0.265794	0.258948	1.02644	0.304686	0.910704	ARHGAP35	N.S.
1.69711	-4.15826	4.28889	-0.969542	0.332275	0.926207	ARHGAP36	N.S.
2532.35	-0.202022	0.225766	-0.894833	0.370877	0.939492	ARHGAP39	N.S.
676.475	-0.552654	0.410854	-1.34513	0.178582	0.79098	ARHGAP4	N.S.
0.719444	-2.90005	4.87276	-0.595156	0.551739	NA	ARHGAP40	N.S.
845.918	0.217411	0.320811	0.677692	0.497967	0.972562	ARHGAP42	N.S.
1500.79	-0.0871548	0.243621	-0.357747	0.720532	0.994885	ARHGAP44	N.S.
3841.6	0.264223	0.246836	1.07044	0.284422	0.898981	ARHGAP5	N.S.
10.5864	0.774789	1.6668	0.464837	0.642048	0.987588	ARHGAP6	N.S.
1151.03	0.171727	0.260961	0.658054	0.510503	0.973041	ARHGAP8	N.S.
6.8693	6.26518	2.51309	2.49302	0.0126662	0.177564	ARHGAP9	N.S.
23451.1	-0.152868	0.216834	-0.705	0.48081	0.971317	ARHGDIA	N.S.
0.291724	1.66547	4.97737	0.334609	0.73792	NA	ARHGDIB	N.S.
363.23	0.118448	0.350215	0.338214	0.735202	0.996643	ARHGDIG	N.S.
3077.1	0.0957105	0.221889	0.431344	0.666219	0.987841	ARHGEF1	N.S.
3731.83	-0.272162	0.23056	-1.18044	0.237825	0.860817	ARHGEF10	N.S.
1097.46	0.549659	0.269276	2.04125	0.0412258	0.389424	ARHGEF10L	N.S.
6560.58	0.0412758	0.232745	0.177343	0.859239	0.997809	ARHGEF11	N.S.
7559.22	0.109232	0.272842	0.400351	0.688898	0.991203	ARHGEF12	N.S.
5.69795	4.55571	2.39849	1.8994	0.0575116	0.472514	ARHGEF15	N.S.
1785.52	-0.216441	0.235341	-0.919693	0.357733	0.937081	ARHGEF16	N.S.
3540.64	0.124546	0.226195	0.550613	0.581899	0.983735	ARHGEF17	N.S.
4908.66	0.415265	0.260904	1.59164	0.111465	0.652301	ARHGEF18	N.S.
137.227	0.913328	0.516669	1.76772	0.0771072	0.554139	ARHGEF19	N.S.
4051.89	0.163605	0.220583	0.741692	0.458274	0.963432	ARHGEF2	N.S.
1434.62	-0.377516	0.29585	-1.27604	0.201943	0.822751	ARHGEF25	N.S.
2604.7	-0.508597	0.318715	-1.59578	0.110539	0.651	ARHGEF26	N.S.
130.966	2.11586	0.549464	3.85077	0.000117749	0.0036696	ARHGEF28	padj<0.05 & Upregulated
1713.76	1.01007	0.253767	3.98031	6.88257e-05	0.00228731	ARHGEF3	padj<0.05 & Upregulated
4.82506	0.872026	2.22848	0.39131	0.695568	0.992567	ARHGEF33	N.S.
0	NA	NA	NA	NA	NA	ARHGEF35	N.S.
16.5767	2.21988	1.38683	1.60069	0.109446	0.649235	ARHGEF37	N.S.
1.38288	2.2541	4.78412	0.471162	0.637525	NA	ARHGEF38	N.S.
226.822	-1.11038	0.41758	-2.65908	0.00783536	0.12608	ARHGEF39	N.S.
389.961	-0.196635	0.354519	-0.554654	0.579131	0.983572	ARHGEF4	N.S.
3009.9	-0.0671257	0.232189	-0.289099	0.772505	0.997809	ARHGEF40	N.S.
0	NA	NA	NA	NA	NA	ARHGEF5	N.S.
461.328	-0.096749	0.342308	-0.282637	0.777455	0.997809	ARHGEF6	N.S.
4179.72	0.120389	0.256691	0.469004	0.639067	0.987588	ARHGEF7	N.S.
715.353	-0.772392	0.302942	-2.54964	0.0107834	0.159389	ARHGEF9	N.S.
9576.85	-0.138257	0.210672	-0.656265	0.511654	0.973441	ARID1A	N.S.
4644.03	-0.202981	0.254828	-0.796541	0.425717	0.950804	ARID1B	N.S.
2261.51	-0.0504725	0.256886	-0.196479	0.844236	0.997809	ARID2	N.S.
2095.5	0.210599	0.237613	0.886314	0.375448	0.940439	ARID3A	N.S.
1814.68	-0.390118	0.24969	-1.56241	0.118191	0.669218	ARID3B	N.S.
6.72987	0.841428	1.91156	0.440179	0.659808	0.987588	ARID3C	N.S.
1090.27	0.0503798	0.286842	0.175636	0.86058	0.997809	ARID4A	N.S.
2640.64	0.283042	0.256907	1.10173	0.270579	0.890564	ARID4B	N.S.
845.345	0.795478	0.296044	2.68703	0.00720914	0.118512	ARID5A	N.S.
6759.77	-0.121348	0.211022	-0.575048	0.565259	0.982581	ARID5B	N.S.
5383.34	0.273172	0.243816	1.1204	0.262542	0.885834	ARIH1	N.S.
6495.43	0.00860175	0.214388	0.0401223	0.967996	0.998406	ARIH2	N.S.
176.203	-0.0900537	0.433217	-0.207872	0.835329	0.997809	ARIH2OS	N.S.
3538.83	-0.00753895	0.237158	-0.0317887	0.974641	0.998628	ARL1	N.S.
4197.29	-0.27809	0.247353	-1.12426	0.260902	0.884879	ARL10	N.S.
0	NA	NA	NA	NA	NA	ARL11	N.S.
2.36194	-0.0508424	3.76377	-0.0135084	0.989222	0.998628	ARL13A	N.S.
1157.03	-0.0648985	0.298904	-0.217121	0.828114	0.997809	ARL13B	N.S.
4.101	5.52596	3.00931	1.83629	0.0663148	0.514197	ARL14	N.S.
1032.06	0.347469	0.270923	1.28254	0.199654	0.820079	ARL14EP	N.S.
0.228766	1.48804	4.9887	0.298281	0.765489	NA	ARL14EPL	N.S.
894.87	0.169772	0.307365	0.552348	0.58071	0.983572	ARL15	N.S.
2122.99	0.137579	0.237556	0.579142	0.562493	0.981358	ARL16	N.S.
362.492	-0.0417978	0.352171	-0.118686	0.905524	0.997809	ARL17A	N.S.
180.966	-0.10526	0.478743	-0.219867	0.825974	0.997809	ARL17B	N.S.
4512.68	-0.241163	0.239976	-1.00494	0.314924	0.916685	ARL2	N.S.
1.434	-3.9159	4.82129	-0.81221	0.416671	NA	ARL2-SNX15	N.S.
4824.94	-0.0561287	0.217661	-0.257872	0.796506	0.997809	ARL2BP	N.S.
821.575	-0.126662	0.279855	-0.4526	0.650837	0.987588	ARL3	N.S.
7551.43	-0.0934536	0.207221	-0.450985	0.652001	0.987588	ARL4A	N.S.
226.671	1.67782	0.435014	3.85694	0.000114817	0.00361259	ARL4C	padj<0.05 & Upregulated
1247.22	1.24308	0.254687	4.88083	1.05639e-06	5.42888e-05	ARL4D	padj<0.05 & Upregulated
3275.3	0.218731	0.230819	0.94763	0.343318	0.928781	ARL5A	N.S.
3031.99	0.0226862	0.245884	0.0922637	0.926489	0.997809	ARL5B	N.S.
1.17577	0.495503	4.7564	0.104176	0.91703	NA	ARL5C	N.S.
423.267	0.369639	0.366281	1.00917	0.312894	0.915166	ARL6	N.S.
8464.1	-0.292973	0.242646	-1.20741	0.227274	0.850155	ARL6IP1	N.S.
2859.87	-0.267966	0.313051	-0.855983	0.392007	0.944762	ARL6IP4	N.S.
4755.46	0.0750448	0.218625	0.343257	0.731405	0.995486	ARL6IP5	N.S.
1519.84	-0.541282	0.281854	-1.92043	0.0548032	0.460003	ARL6IP6	N.S.
5861.54	0.0295614	0.216458	0.136568	0.891372	0.997809	ARL8A	N.S.
6826.38	0.031363	0.223082	0.14059	0.888194	0.997809	ARL8B	N.S.
1.3726	3.95312	4.82559	0.819199	0.412673	NA	ARL9	N.S.
2986.91	-0.0499992	0.251757	-0.198601	0.842575	0.997809	ARMC1	N.S.
2211.57	-0.0747462	0.231992	-0.322194	0.747306	0.997428	ARMC10	N.S.
49.8534	-0.403126	0.81393	-0.495283	0.6204	0.986795	ARMC12	N.S.
98.0745	-0.300691	0.553516	-0.543237	0.586966	0.983735	ARMC2	N.S.
3.88001	-1.15578	2.48074	-0.465901	0.641286	0.987588	ARMC3	N.S.
0	NA	NA	NA	NA	NA	ARMC4	N.S.
1881.65	0.0707927	0.23912	0.296055	0.767188	0.997809	ARMC5	N.S.
3311.63	-0.210557	0.231011	-0.91146	0.362053	0.937081	ARMC6	N.S.
1453.53	0.244635	0.278975	0.876907	0.380537	0.943742	ARMC7	N.S.
1690.48	0.142373	0.238011	0.59818	0.54972	0.980014	ARMC8	N.S.
1063.9	-0.226054	0.278295	-0.812281	0.41663	0.949646	ARMC9	N.S.
13.6393	-0.182162	1.47609	-0.123408	0.901784	0.997809	ARMCX1	N.S.
0	NA	NA	NA	NA	NA	ARMCX2	N.S.
6961.88	0.0956607	0.240916	0.39707	0.691316	0.991793	ARMCX3	N.S.
239.718	-1.03569	0.427333	-2.42362	0.0153667	0.205595	ARMCX4	N.S.
898.916	-0.0957023	0.286048	-0.334567	0.737952	0.996981	ARMCX5	N.S.
2700.72	0.0111639	0.226713	0.0492422	0.960726	0.998406	ARMCX6	N.S.
0.239	-1.3429	4.99659	-0.268763	0.788112	NA	ARMS2	N.S.
1205.86	-0.0626688	0.253984	-0.246744	0.805107	0.997809	ARMT1	N.S.
5893.93	-0.157319	0.222541	-0.70692	0.479616	0.971248	ARNT	N.S.
543.806	0.414783	0.306049	1.35528	0.175327	0.785042	ARNT2	N.S.
593.034	0.196551	0.308358	0.637411	0.523857	0.976876	ARNTL	N.S.
1186.67	-0.0714258	0.271367	-0.263207	0.792391	0.997809	ARNTL2	N.S.
7401.47	-0.168721	0.210695	-0.800781	0.423258	0.950804	ARPC1A	N.S.
7447.96	-0.308927	0.292789	-1.05512	0.291373	0.901895	ARPC1B	N.S.
11785.5	-0.183914	0.22615	-0.81324	0.416081	0.949646	ARPC2	N.S.
8768.2	-0.126232	0.234196	-0.539001	0.589886	0.983735	ARPC3	N.S.
3943.96	-0.39046	0.282154	-1.38386	0.166403	0.77014	ARPC4	N.S.
356.77	-0.197727	0.336665	-0.587312	0.556994	0.981358	ARPC4-TTLL3	N.S.
15326	-0.256328	0.212895	-1.20401	0.228586	0.851083	ARPC5	N.S.
2287	-0.203468	0.239526	-0.849461	0.395625	0.945859	ARPC5L	N.S.
2823.79	-0.380746	0.25222	-1.50958	0.131151	0.702853	ARPIN	N.S.
8441.46	0.139647	0.236661	0.59007	0.555144	0.981358	ARPP19	N.S.
1.71434	-4.17243	4.78438	-0.872094	0.383157	0.943981	ARPP21	N.S.
0	NA	NA	NA	NA	NA	ARR3	N.S.
1363.11	0.329276	0.302492	1.08854	0.276356	0.894345	ARRB1	N.S.
1400.3	-0.0881855	0.263328	-0.334889	0.737709	0.996981	ARRB2	N.S.
1511.7	-0.383008	0.269407	-1.42167	0.155121	0.751867	ARRDC1	N.S.
2204.92	0.282878	0.232276	1.21785	0.22328	0.847482	ARRDC2	N.S.
1975.3	1.32799	0.272367	4.87573	1.08408e-06	5.53449e-05	ARRDC3	padj<0.05 & Upregulated
1514.8	0.552259	0.238897	2.31171	0.0207937	0.252162	ARRDC4	N.S.
0.291724	1.66547	4.97737	0.334609	0.73792	NA	ARRDC5	N.S.
3048.75	-0.457578	0.324193	-1.41144	0.158115	0.757158	ARSA	N.S.
1481.81	-0.431052	0.25425	-1.69539	0.0900022	0.590865	ARSB	N.S.
2061.74	-0.0117787	0.229111	-0.0514103	0.958999	0.998406	ARSD	N.S.
4.01971	-0.487717	3.04658	-0.160087	0.872813	0.997809	ARSE	N.S.
0	NA	NA	NA	NA	NA	ARSF	N.S.
424.589	-0.128622	0.347593	-0.370037	0.711355	0.994885	ARSG	N.S.
0	NA	NA	NA	NA	NA	ARSH	N.S.
23.7714	8.06111	1.82063	4.42765	9.52651e-06	0.000390507	ARSI	padj<0.05 & Upregulated
30.4192	2.1248	1.02115	2.08079	0.0374528	0.369763	ARSJ	N.S.
1048.79	-0.117278	0.278982	-0.420379	0.674209	0.988855	ARSK	N.S.
1.66646	4.23086	4.36686	0.968856	0.332617	0.926207	ART1	N.S.
0	NA	NA	NA	NA	NA	ART3	N.S.
0	NA	NA	NA	NA	NA	ART4	N.S.
0	NA	NA	NA	NA	NA	ART5	N.S.
15.5116	0.384305	1.31719	0.291762	0.770469	0.997809	ARTN	N.S.
801.797	-0.111319	0.282593	-0.39392	0.69364	0.992567	ARV1	N.S.
2814.26	0.741643	0.222013	3.34054	0.000836159	0.0200885	ARVCF	padj<0.05 & Upregulated
43.3607	0.277635	0.834038	0.332881	0.739224	0.996981	ARX	N.S.
24.3142	0.274086	1.15478	0.237349	0.812386	0.997809	AS3MT	N.S.
4944.17	-0.113046	0.212306	-0.532468	0.594402	0.983802	ASAH1	N.S.
70.4243	0.11033	0.712994	0.154742	0.877025	0.997809	ASAH2	N.S.
354.282	-0.544551	0.371168	-1.46713	0.142341	0.726689	ASAH2B	N.S.
6234.72	0.356563	0.250794	1.42174	0.155102	0.751867	ASAP1	N.S.
1188.13	0.487842	0.306506	1.59162	0.111469	0.652301	ASAP2	N.S.
1672.05	0.617323	0.248923	2.47998	0.0131392	0.181423	ASAP3	N.S.
1719.19	-0.134543	0.243578	-0.552361	0.580701	0.983572	ASB1	N.S.
0	NA	NA	NA	NA	NA	ASB10	N.S.
0	NA	NA	NA	NA	NA	ASB11	N.S.
7.50302	-0.636944	1.84834	-0.344603	0.730393	0.995486	ASB12	N.S.
1946.27	-0.0555768	0.233996	-0.237512	0.812259	0.997809	ASB13	N.S.
10.1385	0.272437	1.57887	0.172552	0.863003	0.997809	ASB14	N.S.
0	NA	NA	NA	NA	NA	ASB15	N.S.
134.644	-0.232859	0.489061	-0.476134	0.633979	0.987588	ASB16	N.S.
0	NA	NA	NA	NA	NA	ASB17	N.S.
0.96786	-3.34815	4.83881	-0.691936	0.488977	NA	ASB18	N.S.
50.857	1.6431	0.76457	2.14905	0.0316303	0.334402	ASB2	N.S.
871.455	0.367119	0.269472	1.36236	0.173083	0.780659	ASB3	N.S.
0	NA	NA	NA	NA	NA	ASB4	N.S.
0.457532	2.37939	4.90525	0.485069	0.627627	NA	ASB5	N.S.
3101.8	0.294081	0.232976	1.26228	0.206849	0.827534	ASB6	N.S.
1103.45	0.121845	0.262623	0.463956	0.642679	0.987588	ASB7	N.S.
1483.89	0.331722	0.250335	1.32511	0.185135	0.800339	ASB8	N.S.
2.93588	5.04631	3.43897	1.46739	0.14227	0.726689	ASB9	N.S.
2016.79	-0.357729	0.260023	-1.37576	0.168897	0.772973	ASCC1	N.S.
3365.93	0.0698282	0.22575	0.309317	0.757081	0.997809	ASCC2	N.S.
6489.85	-0.102227	0.214613	-0.476334	0.633836	0.987588	ASCC3	N.S.
4.73258	-0.415981	2.63334	-0.157967	0.874483	0.997809	ASCL1	N.S.
12.3167	1.01816	1.60322	0.635071	0.525382	0.976876	ASCL2	N.S.
0	NA	NA	NA	NA	NA	ASCL3	N.S.
0	NA	NA	NA	NA	NA	ASCL4	N.S.
10.4691	-0.61342	1.57885	-0.388524	0.697628	0.993485	ASCL5	N.S.
1142.23	-0.00436746	0.254219	-0.0171799	0.986293	0.998628	ASF1A	N.S.
460.03	-0.898898	0.359429	-2.50091	0.0123875	0.175725	ASF1B	N.S.
34.2092	-0.649122	0.914323	-0.709948	0.477736	0.970189	ASGR1	N.S.
0	NA	NA	NA	NA	NA	ASGR2	N.S.
4252.42	-0.0199387	0.270299	-0.0737653	0.941197	0.997809	ASH1L	N.S.
2590.12	-0.0607442	0.226274	-0.268454	0.78835	0.997809	ASH2L	N.S.
1402.66	-0.542291	0.312083	-1.73765	0.0822723	0.568915	ASIC1	N.S.
0.457532	2.37939	4.90525	0.485069	0.627627	NA	ASIC2	N.S.
177.941	-0.239166	0.499769	-0.478553	0.632257	0.987588	ASIC3	N.S.
51.6463	1.18221	0.776389	1.5227	0.127834	0.695386	ASIC4	N.S.
0	NA	NA	NA	NA	NA	ASIC5	N.S.
2.002	-2.64639	3.71124	-0.713074	0.4758	0.970189	ASIP	N.S.
1116.12	-0.834657	0.334734	-2.4935	0.0126492	0.177501	ASL	N.S.
0.48981	-2.36404	4.89111	-0.483334	0.628859	NA	ASMT	N.S.
862.586	-0.459974	0.314142	-1.46422	0.143133	0.728396	ASMTL	N.S.
4921.16	-0.120788	0.241794	-0.49955	0.617392	0.986582	ASNA1	N.S.
2386.3	0.612978	0.264581	2.31678	0.0205155	0.250709	ASNS	N.S.
4618.75	0.0581686	0.219535	0.264962	0.791038	0.997809	ASNSD1	N.S.
1.47203	0.0538967	3.78208	0.0142505	0.98863	0.998628	ASPA	N.S.
4.68912	3.0721	2.65225	1.1583	0.246742	0.871514	ASPDH	N.S.
0.48981	-2.36404	4.89111	-0.483334	0.628859	NA	ASPG	N.S.
3729.71	0.419826	0.227746	1.84339	0.0652714	0.509283	ASPH	N.S.
1523.29	-0.00152654	0.248567	-0.00614135	0.9951	0.999914	ASPHD1	N.S.
376.724	0.532777	0.388267	1.37219	0.170004	0.774195	ASPHD2	N.S.
1162.28	-1.0869	0.317741	-3.42071	0.000624569	0.0155342	ASPM	padj<0.05 & Downregulated
2.23619	-0.203336	3.46598	-0.0586663	0.953218	0.998406	ASPN	N.S.
29.547	-0.54628	1.09585	-0.498498	0.618133	0.986582	ASPRV1	N.S.
3463.05	0.040334	0.242449	0.166361	0.867873	0.997809	ASPSCR1	N.S.
1149.62	-0.0984237	0.284321	-0.346171	0.729214	0.995221	ASRGL1	N.S.
1.52258	1.84873	4.18932	0.441297	0.658998	0.987588	ASS1	N.S.
332.631	0.373376	0.359763	1.03784	0.299345	0.906621	ASTE1	N.S.
0.478001	-2.33203	4.89347	-0.47656	0.633676	NA	ASTL	N.S.
5.24513	5.88235	2.75566	2.13464	0.0327905	0.340181	ASTN1	N.S.
1649.98	-0.167047	0.238045	-0.701743	0.48284	0.971726	ASTN2	N.S.
1807.98	-0.194928	0.243666	-0.799981	0.423722	0.950804	ASUN	N.S.
8611.25	-0.0207376	0.213508	-0.0971281	0.922625	0.997809	ASXL1	N.S.
3938.58	0.0376712	0.273199	0.137889	0.890328	0.997809	ASXL2	N.S.
10.8369	1.66429	1.57459	1.05697	0.290525	0.901402	ASXL3	N.S.
0	NA	NA	NA	NA	NA	ASZ1	N.S.
3134.08	0.25721	0.232519	1.10619	0.268644	0.890171	ATAD1	N.S.
2232.79	-0.295286	0.240171	-1.22949	0.21889	0.842761	ATAD2	N.S.
2133.23	-0.179526	0.242614	-0.739964	0.459322	0.963817	ATAD2B	N.S.
2046.82	-0.340726	0.258189	-1.31968	0.186943	0.803688	ATAD3A	N.S.
1749.27	-0.560739	0.281414	-1.99258	0.0463077	0.417846	ATAD3B	N.S.
29.4885	0.756486	0.95642	0.790956	0.42897	0.952638	ATAD3C	N.S.
351.115	-0.644576	0.350395	-1.83957	0.0658316	0.512133	ATAD5	N.S.
727.875	-0.190262	0.286964	-0.663016	0.507321	0.972562	ATAT1	N.S.
0.244905	-1.36065	4.99533	-0.272386	0.785326	NA	ATCAY	N.S.
1691.92	0.0878791	0.261767	0.335715	0.737086	0.996981	ATE1	N.S.
878.667	0.308341	0.272844	1.1301	0.258435	0.881325	ATF1	N.S.
4764.33	0.107324	0.247071	0.434383	0.66401	0.987588	ATF2	N.S.
1036.13	4.79756	1.00141	4.79078	1.66133e-06	8.13369e-05	ATF3	padj<0.05 & Upregulated
13619.7	0.710029	0.303881	2.33654	0.0194633	0.242627	ATF4	N.S.
3926.6	-0.328294	0.239186	-1.37255	0.169893	0.774164	ATF5	N.S.
3595.34	-0.00667308	0.230595	-0.0289386	0.976914	0.998628	ATF6	N.S.
3281.48	-0.340875	0.259856	-1.31178	0.189593	0.807897	ATF6B	N.S.
3126.78	-0.0708391	0.252179	-0.280908	0.778781	0.997809	ATF7	N.S.
2505.4	-0.448593	0.284327	-1.57774	0.114626	0.660021	ATF7IP	N.S.
441.435	-0.222511	0.363304	-0.612466	0.54023	0.979198	ATF7IP2	N.S.
563.991	-0.7272	0.320461	-2.26923	0.0232542	0.271153	ATG10	N.S.
2535.4	0.19797	0.233791	0.846779	0.397118	0.945859	ATG101	N.S.
1857.2	0.139228	0.26719	0.521081	0.60231	0.985604	ATG12	N.S.
5859.88	0.153829	0.210212	0.731782	0.464301	0.965817	ATG13	N.S.
1733.02	0.540045	0.303318	1.78046	0.0750006	0.546227	ATG14	N.S.
1730.12	0.00869268	0.237052	0.03667	0.970748	0.998628	ATG16L1	N.S.
753.655	-0.538525	0.315622	-1.70624	0.087964	0.585924	ATG16L2	N.S.
2499.31	-0.0246274	0.274722	-0.0896448	0.928569	0.997809	ATG2A	N.S.
2627.72	0.219757	0.343207	0.640305	0.521974	0.976423	ATG2B	N.S.
2443.59	0.071951	0.225761	0.318705	0.74995	0.997705	ATG3	N.S.
755.661	-0.106463	0.274697	-0.387564	0.698338	0.993485	ATG4A	N.S.
4299.06	-0.0413068	0.212773	-0.194136	0.84607	0.997809	ATG4B	N.S.
514.129	0.0816719	0.311861	0.261885	0.79341	0.997809	ATG4C	N.S.
904.882	0.261849	0.266247	0.98348	0.325371	0.922997	ATG4D	N.S.
1834.21	0.0512675	0.234772	0.218372	0.82714	0.997809	ATG5	N.S.
1583.17	-0.257806	0.238359	-1.08159	0.279436	0.897509	ATG7	N.S.
7743.15	0.472642	0.227262	2.07972	0.0375515	0.370275	ATG9A	N.S.
271.659	3.03454	0.464905	6.52722	6.70005e-11	6.45868e-09	ATG9B	padj<0.05 & Upregulated
3978.31	-0.899939	0.29032	-3.09982	0.00193638	0.0409436	ATHL1	padj<0.05 & Downregulated
5074.08	-0.254249	0.276947	-0.918044	0.358596	0.937081	ATIC	N.S.
759.818	-0.513487	0.307908	-1.66766	0.0953823	0.608754	ATL1	N.S.
2449.79	0.0879257	0.248251	0.354181	0.723203	0.994885	ATL2	N.S.
4003.49	0.0873801	0.241248	0.362201	0.717202	0.994885	ATL3	N.S.
4250.02	-0.148572	0.225421	-0.659086	0.50984	0.973041	ATM	N.S.
4471.36	0.243546	0.232986	1.04532	0.295873	0.904461	ATMIN	N.S.
8749.46	0.0951824	0.20781	0.458026	0.646934	0.987588	ATN1	N.S.
0	NA	NA	NA	NA	NA	ATOH1	N.S.
29.0964	-0.278898	0.986179	-0.282807	0.777325	0.997809	ATOH7	N.S.
123.587	4.83672	0.616503	7.84541	4.31543e-15	6.69754e-13	ATOH8	padj<0.05 & Upregulated
2222.52	0.223809	0.245814	0.910481	0.362569	0.937081	ATOX1	N.S.
4.47773	5.64844	2.97046	1.90154	0.0572317	0.470963	ATP10A	N.S.
0.228766	1.48804	4.9887	0.298281	0.765489	NA	ATP10B	N.S.
1591.45	-0.0403601	0.309047	-0.130595	0.896095	0.997809	ATP10D	N.S.
5075.37	-0.124667	0.239798	-0.519883	0.603145	0.985604	ATP11A	N.S.
5218.07	-0.0972839	0.228319	-0.426088	0.670044	0.988261	ATP11B	N.S.
3723.79	-0.318871	0.256823	-1.2416	0.214386	0.837712	ATP11C	N.S.
0.915064	3.37114	4.84575	0.69569	0.486623	NA	ATP12A	N.S.
4926.48	-0.0150887	0.229864	-0.0656417	0.947663	0.997981	ATP13A1	N.S.
6120.13	-0.00672334	0.225329	-0.0298379	0.976196	0.998628	ATP13A2	N.S.
3867.68	0.191438	0.270914	0.706637	0.479792	0.971317	ATP13A3	N.S.
0.746904	-0.142074	4.8688	-0.0291805	0.976721	NA	ATP13A4	N.S.
0	NA	NA	NA	NA	NA	ATP13A5	N.S.
11643.9	0.174795	0.206419	0.846797	0.397108	0.945859	ATP1A1	N.S.
18.5923	4.50863	1.51517	2.97566	0.00292357	0.0569307	ATP1A2	N.S.
1289.44	-0.121446	0.276973	-0.438476	0.661041	0.987588	ATP1A3	N.S.
0.875172	3.28765	4.84936	0.677955	0.4978	NA	ATP1A4	N.S.
649.341	0.823952	0.302597	2.72294	0.00647043	0.108799	ATP1B1	N.S.
0	NA	NA	NA	NA	NA	ATP1B2	N.S.
4086.55	0.101728	0.251733	0.404111	0.686131	0.991203	ATP1B3	N.S.
0	NA	NA	NA	NA	NA	ATP1B4	N.S.
62.9187	0.0323284	0.699761	0.0461991	0.963152	0.998406	ATP2A1	N.S.
12484.4	-0.136902	0.213353	-0.641668	0.521089	0.976423	ATP2A2	N.S.
368.047	-0.433268	0.347353	-1.24734	0.212272	0.835787	ATP2A3	N.S.
6318.75	-0.260443	0.281181	-0.926247	0.354318	0.934864	ATP2B1	N.S.
0.239	-1.3429	4.99659	-0.268763	0.788112	NA	ATP2B2	N.S.
1.78344	0.941822	3.47215	0.271251	0.786198	0.997809	ATP2B3	N.S.
17035.3	0.168961	0.233505	0.723586	0.46932	0.968412	ATP2B4	N.S.
6531.87	0.0813493	0.219609	0.370428	0.711064	0.994885	ATP2C1	N.S.
5.15621	0.492293	2.48253	0.198303	0.842808	0.997809	ATP2C2	N.S.
8.65038	0.713289	1.86937	0.381566	0.702783	0.99359	ATP4A	N.S.
0	NA	NA	NA	NA	NA	ATP4B	N.S.
22892.3	-0.352756	0.215637	-1.63588	0.101865	0.626363	ATP5A1	N.S.
26162.1	-0.255243	0.215075	-1.18676	0.235322	0.858433	ATP5B	N.S.
5667.16	-0.290185	0.230233	-1.26039	0.207528	0.828316	ATP5C1	N.S.
4585.23	-0.682985	0.28359	-2.40835	0.0160248	0.212024	ATP5D	N.S.
5415.51	-0.059474	0.210995	-0.281875	0.77804	0.997809	ATP5E	N.S.
1.51823	-0.981221	3.77099	-0.260203	0.794708	0.997809	ATP5EP2	N.S.
6394.75	-0.167061	0.211531	-0.78977	0.429662	0.952638	ATP5F1	N.S.
1938.02	-0.576957	0.31679	-1.82126	0.0685667	0.523942	ATP5G1	N.S.
6709.06	-0.227847	0.233246	-0.976849	0.328644	0.924013	ATP5G2	N.S.
10431.2	-0.440502	0.243223	-1.8111	0.0701252	0.529865	ATP5G3	N.S.
4337.21	-0.192027	0.228356	-0.840908	0.400399	0.946644	ATP5H	N.S.
1213.76	-0.133961	0.27271	-0.49122	0.623271	0.987138	ATP5I	N.S.
2726.96	-0.174746	0.239555	-0.729458	0.465721	0.966439	ATP5J	N.S.
3841.9	-0.264166	0.232338	-1.13699	0.255542	0.880453	ATP5J2	N.S.
1115.92	0.205181	0.307514	0.667225	0.504628	0.972562	ATP5J2-PTCD1	N.S.
4980.92	-0.205546	0.231577	-0.887593	0.37476	0.940087	ATP5L	N.S.
3.25065	-0.548465	2.66782	-0.205586	0.837115	0.997809	ATP5L2	N.S.
5133.68	-0.245435	0.228205	-1.0755	0.282151	0.89805	ATP5O	N.S.
727.227	-0.310094	0.324577	-0.955378	0.339387	0.928611	ATP5S	N.S.
2971.14	0.184546	0.230209	0.801646	0.422758	0.950804	ATP5SL	N.S.
7443.43	-0.0831657	0.208834	-0.398239	0.690454	0.991355	ATP6AP1	N.S.
103.415	0.157878	0.618747	0.255157	0.798601	0.997809	ATP6AP1L	N.S.
11571.1	-0.161453	0.204754	-0.78852	0.430393	0.952984	ATP6AP2	N.S.
11098.9	-0.038984	0.217498	-0.179238	0.857751	0.997809	ATP6V0A1	N.S.
1672.69	-0.133614	0.248499	-0.537685	0.590795	0.983735	ATP6V0A2	N.S.
5.18381	2.01602	2.47043	0.816062	0.414465	0.949356	ATP6V0A4	N.S.
6368.61	0.0565734	0.231203	0.244691	0.806696	0.997809	ATP6V0B	N.S.
21997.9	-0.055506	0.221835	-0.250213	0.802423	0.997809	ATP6V0C	N.S.
8082.95	-0.00753641	0.209209	-0.0360234	0.971264	0.998628	ATP6V0D1	N.S.
4.32996	5.60467	2.94933	1.90032	0.0573917	0.471779	ATP6V0D2	N.S.
7374.58	0.338263	0.223103	1.51617	0.129475	0.698455	ATP6V0E1	N.S.
4886.01	-0.247927	0.219029	-1.13194	0.257661	0.881325	ATP6V0E2	N.S.
6159.69	-0.206357	0.229971	-0.89732	0.369548	0.938689	ATP6V1A	N.S.
89.7605	2.59382	0.702528	3.69212	0.000222389	0.00633682	ATP6V1B1	padj<0.05 & Upregulated
4669.06	0.257749	0.222687	1.15745	0.247088	0.871973	ATP6V1B2	N.S.
11541.9	-0.120886	0.206964	-0.584091	0.559159	0.981358	ATP6V1C1	N.S.
136.376	0.910397	0.576057	1.58039	0.114017	0.659702	ATP6V1C2	N.S.
2802.71	0.470623	0.244646	1.92369	0.054394	0.458552	ATP6V1D	N.S.
7018.89	0.13756	0.21194	0.649053	0.516304	0.975163	ATP6V1E1	N.S.
530.758	-0.389631	0.314227	-1.23997	0.214987	0.837712	ATP6V1E2	N.S.
6204.55	-0.0568661	0.239547	-0.23739	0.812354	0.997809	ATP6V1F	N.S.
6189.3	0.122544	0.211138	0.5804	0.561645	0.981358	ATP6V1G1	N.S.
18.4626	-0.27182	1.25535	-0.21653	0.828575	0.997809	ATP6V1G2	N.S.
32.6583	8.51745	3.73244	2.282	0.0224891	0.264617	ATP6V1G2-DDX39B	N.S.
0	NA	NA	NA	NA	NA	ATP6V1G3	N.S.
5993.17	0.034795	0.213433	0.163025	0.870499	0.997809	ATP6V1H	N.S.
1410.23	-0.348011	0.275743	-1.26209	0.206918	0.827534	ATP7A	N.S.
2017.74	-0.0311378	0.241288	-0.129048	0.89732	0.997809	ATP7B	N.S.
547.998	-0.368015	0.31046	-1.18539	0.235865	0.858604	ATP8A1	N.S.
246.267	0.72762	0.393997	1.84676	0.0647812	0.507268	ATP8A2	N.S.
730.96	1.19982	0.289689	4.14176	3.44648e-05	0.00121017	ATP8B1	padj<0.05 & Upregulated
10844.3	0.107249	0.220392	0.486628	0.626522	0.987533	ATP8B2	N.S.
481.965	-0.111458	0.335094	-0.332618	0.739422	0.996981	ATP8B3	N.S.
3.53019	-4.28369	3.11794	-1.37388	0.169478	0.773016	ATP8B4	N.S.
4973.44	-0.369512	0.24236	-1.52464	0.127348	0.693974	ATP9A	N.S.
853.667	-0.21514	0.264777	-0.812533	0.416486	0.949646	ATP9B	N.S.
3199.68	-0.0703858	0.219376	-0.320845	0.748328	0.997428	ATPAF1	N.S.
1446.58	-0.110863	0.247117	-0.448625	0.653702	0.987588	ATPAF2	N.S.
2744.88	-0.235476	0.251399	-0.936663	0.348932	0.930645	ATPIF1	N.S.
1567.77	-0.269277	0.254261	-1.05906	0.289573	0.901317	ATR	N.S.
3185.92	-0.192904	0.253455	-0.761097	0.446599	0.962237	ATRAID	N.S.
838.569	-0.246244	0.269673	-0.913121	0.361179	0.937081	ATRIP	N.S.
6696.58	-0.146246	0.25634	-0.570518	0.568327	0.982581	ATRN	N.S.
48.914	0.260385	0.770942	0.337749	0.735553	0.996643	ATRNL1	N.S.
4366.79	0.031711	0.254857	0.124426	0.900978	0.997809	ATRX	N.S.
3.07383	2.47448	3.14381	0.787097	0.431225	0.953813	ATXN1	N.S.
6897.28	-0.0849577	0.226783	-0.374621	0.707943	0.994139	ATXN10	N.S.
4153.56	0.355113	0.285511	1.24378	0.213582	0.837712	ATXN1L	N.S.
3361.87	-0.0244884	0.225404	-0.108642	0.913486	0.997809	ATXN2	N.S.
12354	0.0642585	0.209512	0.306705	0.759068	0.997809	ATXN2L	N.S.
1305.46	0.522748	0.258542	2.02191	0.0431861	0.401587	ATXN3	N.S.
0	NA	NA	NA	NA	NA	ATXN3L	N.S.
1234.59	0.250487	0.293585	0.853201	0.393548	0.944981	ATXN7	N.S.
376.118	-0.174181	0.331514	-0.525412	0.599296	0.984761	ATXN7L1	N.S.
500.519	-0.168368	0.318012	-0.529438	0.596502	0.984369	ATXN7L2	N.S.
8163.29	0.0378011	0.206428	0.183121	0.854703	0.997809	ATXN7L3	N.S.
8128.37	-0.0624379	0.211583	-0.295099	0.767918	0.997809	ATXN7L3B	N.S.
434.659	0.149399	0.316114	0.47261	0.636491	0.987588	AUH	N.S.
176.286	-0.140648	0.438567	-0.320699	0.748439	0.997428	AUNIP	N.S.
10196.4	-0.0896225	0.231861	-0.386536	0.6991	0.993485	AUP1	N.S.
838.908	-0.854199	0.294137	-2.90408	0.00368331	0.0689565	AURKA	N.S.
4909.53	-0.0758946	0.251193	-0.302137	0.762548	0.997809	AURKAIP1	N.S.
381.889	-1.57652	0.476504	-3.30851	0.000937951	0.0221905	AURKB	padj<0.05 & Downregulated
11.1537	1.307	1.52858	0.855039	0.39253	0.944762	AURKC	N.S.
809.247	0.668729	0.308662	2.16654	0.0302697	0.326466	AUTS2	N.S.
377.103	0.394273	0.342388	1.15154	0.249511	0.874413	AVEN	N.S.
38.6146	-0.122601	0.83974	-0.145999	0.883922	0.997809	AVIL	N.S.
2419.83	-0.149729	0.253018	-0.591773	0.554003	0.981182	AVL9	N.S.
0	NA	NA	NA	NA	NA	AVP	N.S.
1190.09	0.0360715	0.252988	0.142582	0.88662	0.997809	AVPI1	N.S.
0.239	-1.3429	4.99659	-0.268763	0.788112	NA	AVPR1A	N.S.
0	NA	NA	NA	NA	NA	AVPR1B	N.S.
10.4042	0.463499	1.70369	0.272055	0.785579	0.997809	AVPR2	N.S.
0	NA	NA	NA	NA	NA	AWAT1	N.S.
0	NA	NA	NA	NA	NA	AWAT2	N.S.
4.18604	2.2364	2.60829	0.857423	0.391211	0.944409	AXDND1	N.S.
2021.1	0.223279	0.232807	0.959076	0.33752	0.927883	AXIN1	N.S.
503.845	0.415631	0.315047	1.31926	0.187081	0.803688	AXIN2	N.S.
241.012	3.35348	0.440403	7.61459	2.64538e-14	3.6333e-12	AXL	padj<0.05 & Upregulated
0.57728	2.67047	4.89227	0.545855	0.585165	NA	AZGP1	N.S.
2589.45	0.0312089	0.264086	0.118177	0.905927	0.997809	AZI2	N.S.
11168.6	0.154055	0.249461	0.61755	0.536872	0.978631	AZIN1	N.S.
398.96	0.136411	0.328999	0.414625	0.678417	0.989269	AZIN2	N.S.
98.9674	-1.28431	0.715361	-1.79533	0.0726014	0.53565	AZU1	N.S.
26399.3	1.20695	0.252874	4.77291	1.81584e-06	8.80681e-05	B2M	padj<0.05 & Upregulated
0	NA	NA	NA	NA	NA	B3GALNT1	N.S.
844.189	0.123661	0.273312	0.452454	0.650942	0.987588	B3GALNT2	N.S.
900.517	-0.379511	0.318246	-1.19251	0.233062	0.857038	B3GALT1	N.S.
3585.76	-0.48153	0.291489	-1.65197	0.0985414	0.616736	B3GALT2	N.S.
99.486	-0.875219	0.563746	-1.55251	0.120541	0.678072	B3GALT4	N.S.
2.28866	0.473639	3.42135	0.138436	0.889896	0.997809	B3GALT5	N.S.
3398.28	-0.436887	0.275551	-1.5855	0.112853	0.656828	B3GALT6	N.S.
21.0717	-0.177607	1.1316	-0.156952	0.875283	0.997809	B3GAT1	N.S.
83.5538	0.148364	0.602777	0.246135	0.805578	0.997809	B3GAT2	N.S.
3696.38	-0.218063	0.255875	-0.852222	0.394091	0.945096	B3GAT3	N.S.
758.37	0.0306386	0.271349	0.112912	0.9101	0.997809	B3GLCT	N.S.
2295.82	0.0415076	0.233439	0.177809	0.858873	0.997809	B3GNT2	N.S.
0.875172	3.28765	4.84936	0.677955	0.4978	NA	B3GNT3	N.S.
586.005	-0.927033	0.36218	-2.55959	0.0104795	0.155936	B3GNT4	N.S.
307.097	-0.0263182	0.363768	-0.0723487	0.942324	0.997809	B3GNT5	N.S.
0	NA	NA	NA	NA	NA	B3GNT6	N.S.
3.3599	0.000716871	2.97924	0.000240622	0.999808	0.999967	B3GNT7	N.S.
17.318	4.08381	1.42607	2.86368	0.00418747	0.0766387	B3GNT8	N.S.
102.517	-0.0953073	0.562091	-0.169559	0.865357	0.997809	B3GNT9	N.S.
315.273	-0.0183147	0.39623	-0.0462225	0.963133	0.998406	B3GNTL1	N.S.
6290.68	-0.458402	0.234177	-1.9575	0.0502886	0.4372	B4GALNT1	N.S.
0	NA	NA	NA	NA	NA	B4GALNT2	N.S.
327.952	0.987793	0.367451	2.68823	0.00718321	0.118348	B4GALNT3	N.S.
5883.38	-0.365348	0.30961	-1.18003	0.23799	0.860817	B4GALNT4	N.S.
5101.27	0.115974	0.215315	0.538626	0.590145	0.983735	B4GALT1	N.S.
4889.07	-0.322159	0.223743	-1.43986	0.149907	0.742124	B4GALT2	N.S.
3902.01	-0.238689	0.215163	-1.10934	0.267284	0.888263	B4GALT3	N.S.
954.782	0.101089	0.258599	0.39091	0.695863	0.992567	B4GALT4	N.S.
2840.01	0.16874	0.228212	0.739403	0.459662	0.963817	B4GALT5	N.S.
700.755	-0.517998	0.296912	-1.74462	0.0810511	0.564636	B4GALT6	N.S.
1331.33	-0.118449	0.283582	-0.41769	0.676174	0.988939	B4GALT7	N.S.
2949.33	-0.403708	0.24049	-1.67869	0.0932121	0.601204	B4GAT1	N.S.
505.288	-0.958668	0.402997	-2.37885	0.0173667	0.224599	B9D1	N.S.
184.64	0.35076	0.467342	0.750543	0.452928	0.962486	B9D2	N.S.
4.019	-2.59293	3.11053	-0.833596	0.404508	0.946904	BAALC	N.S.
3.53362	-0.925428	2.56238	-0.36116	0.71798	0.994885	BAAT	N.S.
3484.54	-0.106048	0.233379	-0.454402	0.64954	0.987588	BABAM1	N.S.
2895.18	0.299729	0.26	1.15281	0.24899	0.873917	BACE1	N.S.
1297.07	0.775572	0.265829	2.91756	0.0035278	0.0663655	BACE2	N.S.
2023.89	0.413521	0.283579	1.45822	0.144779	0.731791	BACH1	N.S.
36.3585	-1.15212	1.09814	-1.04916	0.294104	0.904069	BACH2	N.S.
2255.97	-0.184911	0.22735	-0.813335	0.416026	0.949646	BAD	N.S.
3261.23	0.392109	0.256748	1.52721	0.126708	0.692919	BAG1	N.S.
1455.96	0.0279658	0.239626	0.116706	0.907093	0.997809	BAG2	N.S.
7501.47	0.625554	0.249321	2.50903	0.0121064	0.172853	BAG3	N.S.
1280.91	-0.334749	0.261841	-1.27844	0.201093	0.821308	BAG4	N.S.
2247.95	0.153044	0.232846	0.657276	0.511004	0.973041	BAG5	N.S.
13611	-0.0844865	0.208161	-0.405871	0.684837	0.991203	BAG6	N.S.
0	NA	NA	NA	NA	NA	BAGE5	N.S.
2006.8	-0.138565	0.2425	-0.571401	0.567728	0.982581	BAHCC1	N.S.
3118.3	0.214513	0.239897	0.894187	0.371222	0.939492	BAHD1	N.S.
4960.8	0.148072	0.214476	0.69039	0.489949	0.972562	BAIAP2	N.S.
3166.26	-0.208223	0.226802	-0.918081	0.358576	0.937081	BAIAP2L1	N.S.
32.9091	-0.274804	0.935906	-0.293624	0.769046	0.997809	BAIAP2L2	N.S.
596.343	0.0447101	0.410212	0.108993	0.913208	0.997809	BAIAP3	N.S.
4794.75	0.361805	0.235156	1.53857	0.123908	0.685672	BAK1	N.S.
93.4053	2.40407	0.6773	3.5495	0.000385968	0.0102048	BAMBI	padj<0.05 & Upregulated
7744.41	-0.0728616	0.246031	-0.296148	0.767117	0.997809	BANF1	N.S.
0	NA	NA	NA	NA	NA	BANF2	N.S.
5.11629	3.15863	2.61252	1.20904	0.226649	0.850109	BANK1	N.S.
747.076	0.203881	0.325807	0.625774	0.531463	0.9775	BANP	N.S.
10083.4	0.0777589	0.209438	0.371275	0.710433	0.994779	BAP1	N.S.
449.865	0.340424	0.347881	0.978565	0.327795	0.923424	BARD1	N.S.
2.64444	-4.79858	3.58483	-1.33858	0.180707	0.793837	BARHL1	N.S.
137.018	-0.4558	0.480061	-0.949462	0.342386	0.928781	BARHL2	N.S.
6236.69	-0.121215	0.228875	-0.529612	0.596381	0.984369	BARX1	N.S.
4.9199	4.26026	2.68318	1.58776	0.11234	0.655456	BARX2	N.S.
78.4538	2.40462	0.708327	3.39479	0.000686802	0.0168391	BASP1	padj<0.05 & Upregulated
0	NA	NA	NA	NA	NA	BATF	N.S.
1215.33	1.80671	0.349153	5.17455	2.28455e-07	1.323e-05	BATF2	padj<0.05 & Upregulated
331.992	-0.160571	0.450384	-0.35652	0.721451	0.994885	BATF3	N.S.
10869.6	-0.036019	0.228161	-0.157867	0.874562	0.997809	BAX	N.S.
2368.23	0.328525	0.250486	1.31155	0.189672	0.807897	BAZ1A	N.S.
5452.13	0.0157006	0.231547	0.0678073	0.945939	0.997973	BAZ1B	N.S.
8056.92	-0.0923688	0.235142	-0.392821	0.694452	0.992567	BAZ2A	N.S.
1374.52	0.462539	0.313263	1.47652	0.139804	0.721327	BAZ2B	N.S.
5135.47	0.023773	0.268063	0.0886842	0.929333	0.997809	BBC3	N.S.
372.951	-0.169248	0.333026	-0.508212	0.611305	0.985604	BBIP1	N.S.
209.086	-0.31128	0.41981	-0.741477	0.458404	0.963432	BBOF1	N.S.
1.68549	4.23836	4.35806	0.972534	0.330785	0.92534	BBOX1	N.S.
1399.27	-0.104567	0.245987	-0.425092	0.67077	0.988261	BBS1	N.S.
980.869	0.0182628	0.258595	0.070623	0.943698	0.997809	BBS10	N.S.
459.366	0.235255	0.311627	0.754926	0.450293	0.962319	BBS12	N.S.
2618.19	-0.139461	0.252923	-0.551397	0.581362	0.983572	BBS2	N.S.
1579.36	-0.0575582	0.236975	-0.242887	0.808093	0.997809	BBS4	N.S.
1298.16	-0.105275	0.243521	-0.432304	0.66552	0.987841	BBS5	N.S.
1258.57	-0.126883	0.248468	-0.510663	0.609587	0.985604	BBS7	N.S.
968.37	-0.161468	0.270823	-0.596213	0.551033	0.980359	BBS9	N.S.
3349.87	0.113216	0.322613	0.350935	0.725637	0.994885	BBX	N.S.
3832.41	0.525883	0.249245	2.10991	0.0348662	0.353214	BCAM	N.S.
29.6664	-0.603369	1.099	-0.549018	0.582993	0.983735	BCAN	N.S.
2294.45	0.0801645	0.228535	0.350775	0.725757	0.994885	BCAP29	N.S.
16516.9	0.117341	0.227737	0.515248	0.60638	0.985604	BCAP31	N.S.
6795.42	0.397232	0.229759	1.72891	0.0838252	0.57308	BCAR1	N.S.
721.769	0.662809	0.294608	2.2498	0.0244618	0.281846	BCAR3	N.S.
8.25159	-0.123436	1.76373	-0.0699856	0.944205	0.997809	BCAS1	N.S.
1543.5	0.304001	0.268152	1.13369	0.256925	0.881325	BCAS2	N.S.
1645.17	-0.0918457	0.267902	-0.342833	0.731724	0.995486	BCAS3	N.S.
598.811	-0.282896	0.314118	-0.900605	0.367798	0.937704	BCAS4	N.S.
2.62552	4.87749	4.03862	1.20771	0.227158	0.850109	BCAT1	N.S.
3145.68	-0.350901	0.244138	-1.43731	0.150631	0.743335	BCAT2	N.S.
3346.88	-0.145202	0.227707	-0.637668	0.52369	0.976876	BCCIP	N.S.
538.391	-0.258726	0.296828	-0.871636	0.383407	0.943981	BCDIN3D	N.S.
102.526	-1.17155	0.615246	-1.9042	0.0568842	0.468352	BCHE	N.S.
1079.95	0.234237	0.281927	0.830844	0.406062	0.948208	BCKDHA	N.S.
793.458	-0.355477	0.289581	-1.22756	0.219613	0.843888	BCKDHB	N.S.
1999.35	-0.267153	0.311068	-0.858825	0.390437	0.943989	BCKDK	N.S.
974.072	0.189393	0.260851	0.726058	0.467803	0.967653	BCL10	N.S.
3.44742	0.929537	2.88688	0.321987	0.747462	0.997428	BCL11A	N.S.
7.72064	-1.06007	2.15881	-0.491044	0.623395	0.987138	BCL11B	N.S.
25.7647	1.22026	1.03451	1.17956	0.238177	0.860817	BCL2	N.S.
10.982	1.04762	1.6039	0.653172	0.513645	0.973551	BCL2A1	N.S.
6445.29	1.24309	0.213018	5.83559	5.35991e-09	3.92386e-07	BCL2L1	padj<0.05 & Upregulated
4.61527	-0.150867	2.27164	-0.066413	0.947049	0.997981	BCL2L10	N.S.
877.968	0.600526	0.310189	1.936	0.0528676	0.450827	BCL2L11	N.S.
1784.5	-0.248823	0.241703	-1.02946	0.303263	0.910704	BCL2L12	N.S.
3049.93	0.532278	0.220678	2.41202	0.0158645	0.210868	BCL2L13	N.S.
1.8406	2.73904	4.27064	0.641365	0.521286	0.976423	BCL2L14	N.S.
12.891	-2.59448	1.56215	-1.66084	0.0967449	0.612911	BCL2L15	N.S.
1368.68	0.228889	0.263049	0.870141	0.384224	0.943981	BCL2L2	N.S.
526.964	-0.146969	0.317182	-0.463359	0.643107	0.987588	BCL2L2-PABPN1	N.S.
1120.83	0.335133	0.309811	1.08173	0.279371	0.897503	BCL3	N.S.
419.816	0.871438	0.352847	2.46973	0.0135215	0.185219	BCL6	N.S.
4.48496	0.0850265	2.27074	0.0374445	0.970131	0.998572	BCL6B	N.S.
1865.18	0.190391	0.240303	0.792296	0.428188	0.952638	BCL7A	N.S.
2865.12	-0.134592	0.224991	-0.59821	0.5497	0.980014	BCL7B	N.S.
4820.81	-0.481671	0.264079	-1.82397	0.0681572	0.523309	BCL7C	N.S.
3907.66	-0.166733	0.281227	-0.592879	0.553262	0.9804	BCL9	N.S.
5956.69	0.145753	0.215116	0.677557	0.498053	0.972562	BCL9L	N.S.
7971.33	-0.0165575	0.229714	-0.0720788	0.942539	0.997809	BCLAF1	N.S.
0.239	-1.3429	4.99659	-0.268763	0.788112	NA	BCO1	N.S.
29.9549	2.54575	1.00794	2.52569	0.0115472	0.1664	BCO2	N.S.
3114.51	-0.263806	0.221451	-1.19126	0.23355	0.857308	BCOR	N.S.
4366.06	-0.0585606	0.261921	-0.223581	0.823083	0.997809	BCORL1	N.S.
7149.59	0.156144	0.217022	0.719487	0.471841	0.970059	BCR	N.S.
1384.51	-0.34825	0.249629	-1.39507	0.162995	0.765944	BCS1L	N.S.
3.17964	3.23468	3.19849	1.01131	0.311866	0.915037	BDH1	N.S.
432.083	0.303063	0.337517	0.897918	0.369229	0.938639	BDH2	N.S.
5.64364	5.97472	2.73735	2.18267	0.0290603	0.316503	BDKRB1	N.S.
10.6064	6.89878	2.20447	3.12945	0.00175133	0.0377866	BDKRB2	padj<0.05 & Upregulated
170.512	0.373467	0.465023	0.803115	0.421908	0.950804	BDNF	N.S.
2430.78	-0.00372532	0.243686	-0.0152874	0.987803	0.998628	BDP1	N.S.
146.989	0.850614	0.46916	1.81306	0.0698226	0.528608	BEAN1	N.S.
4102.13	0.10404	0.218024	0.477197	0.633222	0.987588	BECN1	N.S.
0	NA	NA	NA	NA	NA	BECN2	N.S.
418.891	-0.353891	0.33964	-1.04196	0.297431	0.906007	BEGAIN	N.S.
0.239	-1.3429	4.99659	-0.268763	0.788112	NA	BEND2	N.S.
749.689	-0.0236994	0.276436	-0.0857318	0.93168	0.997809	BEND3	N.S.
1461.09	-0.0216061	0.278542	-0.0775687	0.938171	0.997809	BEND4	N.S.
2.64675	1.2134	2.92831	0.414368	0.678605	0.989269	BEND5	N.S.
183.232	0.262828	0.467039	0.562755	0.573602	0.982973	BEND6	N.S.
1138.4	0.163477	0.290744	0.562271	0.573931	0.98305	BEND7	N.S.
116.024	2.3034	0.613704	3.75328	0.000174533	0.00514972	BEST1	padj<0.05 & Upregulated
2.8926	0.00965424	3.47042	0.00278186	0.99778	0.999967	BEST2	N.S.
0	NA	NA	NA	NA	NA	BEST3	N.S.
4.61998	1.9174	2.40113	0.798539	0.424558	0.950804	BEST4	N.S.
1043.17	0.0667901	0.260599	0.256295	0.797723	0.997809	BET1	N.S.
4354.15	0.00839112	0.216895	0.0386875	0.96914	0.998495	BET1L	N.S.
0	NA	NA	NA	NA	NA	BEX1	N.S.
134.623	0.388753	0.583768	0.665937	0.505452	0.972562	BEX2	N.S.
1693.18	-0.16925	0.253169	-0.668525	0.503799	0.972562	BEX4	N.S.
0	NA	NA	NA	NA	NA	BEX5	N.S.
4596.52	-0.130283	0.215683	-0.604048	0.545812	0.979198	BFAR	N.S.
13.6621	-0.880453	1.41129	-0.623865	0.532716	0.9775	BFSP1	N.S.
0	NA	NA	NA	NA	NA	BFSP2	N.S.
4.81074	1.70643	2.3366	0.730305	0.465204	0.966168	BGLAP	N.S.
45.7334	5.26875	1.15427	4.56455	5.00559e-06	0.00022176	BGN	padj<0.05 & Upregulated
55.258	-0.312928	0.711554	-0.439781	0.660096	0.987588	BHLHA15	N.S.
2.55513	-0.978734	3.27456	-0.29889	0.765024	0.997809	BHLHA9	N.S.
1390.7	-0.0112621	0.294459	-0.0382468	0.969491	0.998495	BHLHB9	N.S.
0.781917	-0.798209	4.87061	-0.163883	0.869823	NA	BHLHE22	N.S.
0	NA	NA	NA	NA	NA	BHLHE23	N.S.
6079.68	0.330178	0.214156	1.54176	0.123132	0.683718	BHLHE40	N.S.
13.4606	1.5627	1.76774	0.884012	0.37669	0.941214	BHLHE41	N.S.
1.21313	-3.67386	4.82793	-0.760959	0.446681	NA	BHMG1	N.S.
0.291724	1.66547	4.97737	0.334609	0.73792	NA	BHMT	N.S.
0.291724	1.66547	4.97737	0.334609	0.73792	NA	BHMT2	N.S.
11.6914	-0.997958	1.47684	-0.67574	0.499206	0.972562	BICC1	N.S.
668.798	0.348085	0.284077	1.22532	0.220454	0.845418	BICD1	N.S.
4148.85	0.115529	0.238962	0.48346	0.628769	0.987588	BICD2	N.S.
1713.85	0.0380486	0.244111	0.155866	0.876139	0.997809	BID	N.S.
221.304	0.619753	0.43786	1.41541	0.156947	0.756312	BIK	N.S.
3001.88	0.30335	0.221369	1.37034	0.170582	0.775669	BIN1	N.S.
6.10502	0.0764355	1.99474	0.0383185	0.969434	0.998495	BIN2	N.S.
707.471	0.120762	0.276905	0.436114	0.662754	0.987588	BIN3	N.S.
3523.25	0.430421	0.247527	1.73888	0.0820553	0.568227	BIRC2	N.S.
358.17	0.824609	0.352732	2.33778	0.0193986	0.24221	BIRC3	N.S.
1473.72	-1.51204	0.376127	-4.02002	5.81937e-05	0.00196697	BIRC5	padj<0.05 & Downregulated
7111.68	0.239741	0.213125	1.12488	0.260638	0.884645	BIRC6	N.S.
1.60136	4.17464	4.8198	0.866143	0.386412	0.943981	BIRC7	N.S.
0	NA	NA	NA	NA	NA	BIRC8	N.S.
1614.1	-0.30251	0.246362	-1.22791	0.219482	0.843888	BIVM	N.S.
608.005	0.261	0.370879	0.703733	0.481599	0.971317	BIVM-ERCC5	N.S.
0	NA	NA	NA	NA	NA	BLACE	N.S.
1804.02	0.0248494	0.242496	0.102473	0.918381	0.997809	BLCAP	N.S.
0	NA	NA	NA	NA	NA	BLID	N.S.
20.7323	-1.31467	1.15121	-1.142	0.253455	0.878002	BLK	N.S.
269.841	-0.290182	0.389057	-0.74586	0.455752	0.963432	BLM	N.S.
5670.68	-0.321257	0.214087	-1.50059	0.133462	0.709193	BLMH	N.S.
22.203	7.961	1.85134	4.30013	1.70697e-05	0.000643013	BLNK	padj<0.05 & Upregulated
1651.5	-0.408763	0.275052	-1.48613	0.137245	0.71586	BLOC1S1	N.S.
3531.86	-0.00016081	0.222697	-0.000722102	0.999424	0.999967	BLOC1S2	N.S.
1425.98	0.276135	0.309231	0.892971	0.371873	0.940087	BLOC1S3	N.S.
1834.28	-0.0701449	0.27064	-0.259182	0.795495	0.997809	BLOC1S4	N.S.
886.883	0.188882	0.269124	0.70184	0.482779	0.971726	BLOC1S5	N.S.
8.12601	-6.41826	2.76481	-2.32141	0.0202649	0.249612	BLOC1S5-TXNDC5	N.S.
3600.45	0.0786274	0.245372	0.320441	0.748634	0.997428	BLOC1S6	N.S.
2202.68	-0.192495	0.257125	-0.748646	0.454071	0.962861	BLVRA	N.S.
9965.85	-0.444636	0.244854	-1.81592	0.0693823	0.526302	BLVRB	N.S.
1986.01	0.266083	0.248552	1.07053	0.284379	0.898981	BLZF1	N.S.
501.684	0.235306	0.305161	0.771088	0.440655	0.958765	BMF	N.S.
3446.22	-0.058905	0.229406	-0.256772	0.797355	0.997809	BMI1	N.S.
4659.26	0.604976	0.221605	2.72998	0.00633383	0.106733	BMP1	N.S.
0	NA	NA	NA	NA	NA	BMP10	N.S.
0	NA	NA	NA	NA	NA	BMP15	N.S.
285.65	-0.133357	0.44425	-0.300184	0.764037	0.997809	BMP2	N.S.
867.325	-0.410322	0.26711	-1.53616	0.1245	0.687143	BMP2K	N.S.
67.8734	-0.357745	0.682912	-0.523852	0.600381	0.984948	BMP3	N.S.
234.656	0.209417	0.407059	0.514463	0.606928	0.985604	BMP4	N.S.
1.195	-3.65298	4.82856	-0.756537	0.449327	NA	BMP5	N.S.
8.82272	3.02591	1.81267	1.66931	0.0950564	0.608361	BMP6	N.S.
3659.28	0.161826	0.230458	0.702194	0.482558	0.971726	BMP7	N.S.
105.929	-0.181831	0.551213	-0.329874	0.741495	0.997179	BMP8A	N.S.
1408.34	0.105897	0.250207	0.423238	0.672122	0.988296	BMP8B	N.S.
16.7379	0.810197	1.62774	0.497744	0.618664	0.986608	BMPER	N.S.
4382.54	0.155099	0.24138	0.642551	0.520516	0.976423	BMPR1A	N.S.
3914.46	-0.595571	0.289032	-2.06057	0.0393438	0.379141	BMPR1B	N.S.
8256.39	-0.0219056	0.226379	-0.0967654	0.922913	0.997809	BMPR2	N.S.
4342.27	0.0730411	0.214255	0.340908	0.733173	0.995548	BMS1	N.S.
1.60136	4.17464	4.8198	0.866143	0.386412	0.943981	BMX	N.S.
2.20958	0.840887	3.86974	0.217298	0.827976	0.997809	BNC1	N.S.
18.3542	0.946881	1.44053	0.657314	0.510979	0.973041	BNC2	N.S.
740.515	0.191525	0.274616	0.697428	0.485535	0.972562	BNIP1	N.S.
3432.36	0.0313227	0.226504	0.138287	0.890013	0.997809	BNIP2	N.S.
4446.37	0.111973	0.221294	0.505994	0.612861	0.985696	BNIP3	N.S.
4662.22	0.662569	0.256176	2.58638	0.00969901	0.147288	BNIP3L	N.S.
73.5368	0.436775	0.71849	0.607907	0.543249	0.979198	BNIPL	N.S.
445.093	0.0272774	0.350148	0.0779026	0.937906	0.997809	BOC	N.S.
3438.78	0.0213627	0.219338	0.0973962	0.922412	0.997809	BOD1	N.S.
3904.11	0.0911597	0.244909	0.372218	0.709731	0.994334	BOD1L1	N.S.
0	NA	NA	NA	NA	NA	BOD1L2	N.S.
3224.22	-0.028678	0.242062	-0.118474	0.905692	0.997809	BOK	N.S.
984.276	-0.13721	0.269029	-0.51002	0.610038	0.985604	BOLA1	N.S.
604.427	-0.147239	0.340964	-0.431832	0.665864	0.987841	BOLA2	N.S.
516.9	-0.316287	0.323691	-0.977125	0.328507	0.923989	BOLA2B	N.S.
1067.23	-0.318627	0.274375	-1.16128	0.245526	0.868604	BOLA3	N.S.
1.8507	1.5282	4.17256	0.366251	0.714178	0.994885	BOLL	N.S.
6351.52	-0.317049	0.263639	-1.20259	0.229136	0.851986	BOP1	N.S.
258.871	-0.683096	0.404014	-1.69077	0.0908798	0.593127	BORA	N.S.
635.679	-0.181502	0.291373	-0.622918	0.533339	0.9775	BORCS5	N.S.
3008.13	-0.597296	0.297787	-2.00579	0.0448791	0.411414	BORCS6	N.S.
1082.8	0.0672426	0.256017	0.262649	0.792821	0.997809	BORCS7	N.S.
0	NA	NA	NA	NA	NA	BORCS7-ASMT	N.S.
1036.11	-0.470817	0.330308	-1.42539	0.154045	0.749779	BORCS8	N.S.
321.741	0.419569	0.39782	1.05467	0.291575	0.902027	BORCS8-MEF2B	N.S.
994.984	0.125855	0.274885	0.457845	0.647064	0.987588	BPGM	N.S.
1390.54	-0.515614	0.259979	-1.98329	0.0473347	0.423176	BPHL	N.S.
0.291724	1.66547	4.97737	0.334609	0.73792	NA	BPI	N.S.
0	NA	NA	NA	NA	NA	BPIFA1	N.S.
1.83013	4.36701	4.64933	0.939276	0.347589	0.92997	BPIFA2	N.S.
0	NA	NA	NA	NA	NA	BPIFA3	N.S.
7.59677	6.41252	2.45147	2.61579	0.00890221	0.138656	BPIFB1	N.S.
0	NA	NA	NA	NA	NA	BPIFB2	N.S.
0	NA	NA	NA	NA	NA	BPIFB3	N.S.
2.52198	-4.05355	3.77226	-1.07457	0.282569	0.898429	BPIFB4	N.S.
0	NA	NA	NA	NA	NA	BPIFB6	N.S.
0	NA	NA	NA	NA	NA	BPIFC	N.S.
2870.31	-0.298794	0.227287	-1.31461	0.18864	0.805863	BPNT1	N.S.
7701.53	-0.133152	0.216434	-0.615208	0.538418	0.978826	BPTF	N.S.
0	NA	NA	NA	NA	NA	BPY2	N.S.
0	NA	NA	NA	NA	NA	BPY2B	N.S.
0	NA	NA	NA	NA	NA	BPY2C	N.S.
1255.43	-0.179299	0.251419	-0.71315	0.475753	0.970189	BRAF	N.S.
1939.23	0.400148	0.252478	1.58488	0.112994	0.656828	BRAP	N.S.
5282.67	-0.190878	0.216422	-0.88197	0.377793	0.941533	BRAT1	N.S.
1139.32	0.0502549	0.290508	0.17299	0.862659	0.997809	BRCA1	N.S.
533.296	-0.244148	0.355502	-0.68677	0.492228	0.972562	BRCA2	N.S.
909.365	-0.0365888	0.266639	-0.137222	0.890855	0.997809	BRCC3	N.S.
2218.96	0.213756	0.246268	0.867983	0.385403	0.943981	BRD1	N.S.
21766.6	0.286798	0.231884	1.23681	0.216156	0.838849	BRD2	N.S.
4289.32	0.10456	0.239176	0.43717	0.661988	0.987588	BRD3	N.S.
9669.35	-0.0364199	0.252628	-0.144164	0.885371	0.997809	BRD4	N.S.
4528	0.030723	0.226264	0.135784	0.891992	0.997809	BRD7	N.S.
3973.36	-0.141118	0.244383	-0.577445	0.563639	0.981763	BRD8	N.S.
2330.34	0.0270361	0.235363	0.11487	0.908548	0.997809	BRD9	N.S.
0	NA	NA	NA	NA	NA	BRDT	N.S.
1595.75	0.0118529	0.246258	0.048132	0.961611	0.998406	BRE	N.S.
3487.98	0.0515859	0.230863	0.223448	0.823187	0.997809	BRF1	N.S.
1462.92	0.32534	0.29889	1.0885	0.276376	0.894345	BRF2	N.S.
8616.53	0.234024	0.216424	1.08132	0.279554	0.897525	BRI3	N.S.
1993.28	-0.495297	0.242015	-2.04655	0.0407019	0.386357	BRI3BP	N.S.
86.0745	0.715287	0.588876	1.21467	0.224494	0.849123	BRICD5	N.S.
29.8342	-0.246011	0.961772	-0.255789	0.798114	0.997809	BRINP1	N.S.
0	NA	NA	NA	NA	NA	BRINP2	N.S.
1.22453	-3.68684	4.82755	-0.763709	0.445041	NA	BRINP3	N.S.
285.962	-0.606521	0.45037	-1.34672	0.178072	0.78998	BRIP1	N.S.
2008.06	-0.182244	0.249357	-0.730854	0.464868	0.966168	BRIX1	N.S.
6965.69	-0.0748306	0.208539	-0.358833	0.71972	0.994885	BRK1	N.S.
2679.53	0.275367	0.254814	1.08066	0.27985	0.897541	BRMS1	N.S.
995.304	-0.205577	0.257946	-0.796977	0.425465	0.950804	BRMS1L	N.S.
3876.5	0.195079	0.257999	0.756123	0.449575	0.962319	BROX	N.S.
2157.97	0.145646	0.235003	0.619761	0.535415	0.978066	BRPF1	N.S.
3656.65	0.164266	0.225564	0.728249	0.466461	0.966834	BRPF3	N.S.
0	NA	NA	NA	NA	NA	BRS3	N.S.
993.256	-0.230265	0.305969	-0.752574	0.451706	0.962319	BRSK1	N.S.
1957.84	-0.228995	0.260734	-0.87827	0.379797	0.943113	BRSK2	N.S.
1719.97	-0.0874992	0.236226	-0.370406	0.71108	0.994885	BRWD1	N.S.
1502.82	-0.483352	0.361125	-1.33846	0.180747	0.793837	BRWD3	N.S.
917.017	-0.26588	0.274651	-0.968063	0.333013	0.926207	BSCL2	N.S.
5470.76	0.163496	0.213008	0.767559	0.44275	0.959603	BSDC1	N.S.
22905.6	0.0220186	0.226339	0.0972815	0.922503	0.997809	BSG	N.S.
669.103	0.329996	0.453702	0.727342	0.467017	0.967058	BSN	N.S.
0.239	-1.3429	4.99659	-0.268763	0.788112	NA	BSND	N.S.
0	NA	NA	NA	NA	NA	BSPH1	N.S.
105.44	-0.0413505	0.560713	-0.0737464	0.941212	0.997809	BSPRY	N.S.
9.25396	-0.323814	1.63826	-0.197657	0.843313	0.997809	BST1	N.S.
3394.38	12.1974	1.16496	10.4703	1.18305e-25	3.90657e-23	BST2	padj<0.05 & Upregulated
0	NA	NA	NA	NA	NA	BSX	N.S.
2136.63	0.155811	0.278795	0.558874	0.576248	0.983435	BTAF1	N.S.
6093.38	-0.159887	0.21301	-0.75061	0.452888	0.962486	BTBD1	N.S.
2640.65	0.0762205	0.228796	0.333137	0.739031	0.996981	BTBD10	N.S.
24.4176	6.62576	1.79702	3.68708	0.000226839	0.00640099	BTBD11	padj<0.05 & Upregulated
3.0016	1.61336	3.12486	0.516297	0.605647	0.985604	BTBD16	N.S.
0.291724	1.66547	4.97737	0.334609	0.73792	NA	BTBD17	N.S.
3.9807	0.041397	2.72241	0.015206	0.987868	0.998628	BTBD18	N.S.
82.5855	0.363993	0.725754	0.501538	0.615993	0.986401	BTBD19	N.S.
8554.07	-0.0981889	0.209929	-0.467725	0.639981	0.987588	BTBD2	N.S.
6527.6	-0.268682	0.241663	-1.1118	0.266223	0.888069	BTBD3	N.S.
4.11114	-1.88784	2.76516	-0.682723	0.494782	0.972562	BTBD6	N.S.
2590.01	-0.0891289	0.254285	-0.350508	0.725958	0.994885	BTBD7	N.S.
41.3003	0.481727	0.83713	0.57545	0.564987	0.982581	BTBD8	N.S.
1712.71	0.37165	0.279618	1.32914	0.183803	0.798161	BTBD9	N.S.
0.583448	2.6981	4.88162	0.552705	0.580466	NA	BTC	N.S.
297.753	-0.169636	0.359354	-0.472059	0.636885	0.987588	BTD	N.S.
16126.7	-0.178509	0.206599	-0.864038	0.387567	0.943981	BTF3	N.S.
2958.28	-0.0226907	0.222567	-0.10195	0.918797	0.997809	BTF3L4	N.S.
1129.43	0.601596	0.271569	2.21526	0.0267424	0.299022	BTG1	N.S.
[truncated: 17,900 more rows]

## Sheet: B. CTRL; +DOX vs -DOX
baseMean	log2FoldChange	lfcSE	stat	pvalue	padj	Gene	Significance
977.509	0.0214407	0.311714	0.0687831	0.945162	0.999201	A1BG	N.S.
1.24345	-1.90868	4.32246	-0.441573	0.658799	0.998563	A1CF	N.S.
4.27916	2.00924	2.75734	0.728689	0.466192	0.998563	A2M	N.S.
37.2757	-0.88964	0.824933	-1.07844	0.280838	0.998563	A2ML1	N.S.
0	NA	NA	NA	NA	NA	A3GALT2	N.S.
1816.54	-0.143325	0.226865	-0.631764	0.527541	0.998563	A4GALT	N.S.
2.07346	4.5238	3.79993	1.19049	0.233852	0.998563	A4GNT	N.S.
2126.15	0.0155671	0.22208	0.070097	0.944116	0.999201	AAAS	N.S.
3465.52	-0.188206	0.207443	-0.90727	0.364264	0.998563	AACS	N.S.
0	NA	NA	NA	NA	NA	AADAC	N.S.
0	NA	NA	NA	NA	NA	AADACL2	N.S.
0	NA	NA	NA	NA	NA	AADACL3	N.S.
0	NA	NA	NA	NA	NA	AADACL4	N.S.
633.862	0.0517364	0.270831	0.191028	0.848503	0.998563	AADAT	N.S.
1292.43	0.00743032	0.244983	0.0303299	0.975804	0.999201	AAED1	N.S.
3326.82	-0.192346	0.208609	-0.922038	0.356509	0.998563	AAGAB	N.S.
4061.68	-0.438712	0.326134	-1.34519	0.178564	0.998563	AAK1	N.S.
624.252	0.297865	0.283071	1.05226	0.292679	0.998563	AAMDC	N.S.
6130.47	0.256245	0.219718	1.16625	0.243515	0.998563	AAMP	N.S.
3.12038	-3.19766	2.92592	-1.09287	0.274449	0.998563	AANAT	N.S.
1653.45	0.0828423	0.234526	0.353233	0.723914	0.998563	AAR2	N.S.
1.52345	1.09251	3.92841	0.278106	0.780931	0.998563	AARD	N.S.
4886.93	0.0491148	0.231557	0.212107	0.832024	0.998563	AARS	N.S.
1272.61	0.0160281	0.233956	0.0685091	0.94538	0.999201	AARS2	N.S.
1485.98	0.216836	0.238667	0.908531	0.363598	0.998563	AARSD1	N.S.
575.28	-0.170415	0.287774	-0.592185	0.553727	0.998563	AASDH	N.S.
3029.69	-0.0510852	0.214009	-0.238706	0.811334	0.998563	AASDHPPT	N.S.
108.771	-0.208375	0.523727	-0.397869	0.690727	0.998563	AASS	N.S.
6027.04	0.255996	0.202958	1.26133	0.207191	0.998563	AATF	N.S.
1573.6	0.177029	0.229532	0.771262	0.440551	0.998563	AATK	N.S.
793.007	0.13523	0.256685	0.526832	0.598311	0.998563	ABAT	N.S.
154.197	-0.0231876	0.461736	-0.0502182	0.959948	0.999201	ABC7-42404400C24.1	N.S.
21.6681	-1.06353	1.28332	-0.828732	0.407256	0.998563	ABCA1	N.S.
0.554179	-0.905527	4.94826	-0.182999	0.854799	0.998563	ABCA10	N.S.
0.263943	1.53742	4.99164	0.307999	0.758083	0.998563	ABCA12	N.S.
0.24662	-1.39	4.9962	-0.278211	0.78085	0.998563	ABCA13	N.S.
8966.92	-0.0920519	0.235809	-0.390366	0.696266	0.998563	ABCA2	N.S.
15891.1	-0.106139	0.216695	-0.489808	0.62427	0.998563	ABCA3	N.S.
0	NA	NA	NA	NA	NA	ABCA4	N.S.
45.2374	1.22354	0.819865	1.49237	0.135601	0.998563	ABCA5	N.S.
0	NA	NA	NA	NA	NA	ABCA6	N.S.
2816.96	-0.037206	0.29221	-0.127326	0.898682	0.999201	ABCA7	N.S.
0.24662	-1.39	4.9962	-0.278211	0.78085	0.998563	ABCA8	N.S.
0	NA	NA	NA	NA	NA	ABCA9	N.S.
6.40607	0.650427	2.16745	0.300088	0.76411	0.998563	ABCB1	N.S.
3737.39	-0.139419	0.213572	-0.652796	0.513888	0.998563	ABCB10	N.S.
0	NA	NA	NA	NA	NA	ABCB11	N.S.
0.527885	2.54669	4.88912	0.52089	0.602444	0.998563	ABCB4	N.S.
0.263943	1.53742	4.99164	0.307999	0.758083	0.998563	ABCB5	N.S.
73.3138	0.831309	0.747251	1.11249	0.265928	0.998563	ABCB6	N.S.
1074.07	0.332252	0.246151	1.34979	0.177084	0.998563	ABCB7	N.S.
1188.59	-0.133039	0.241396	-0.551122	0.58155	0.998563	ABCB8	N.S.
1081.69	0.301833	0.242964	1.2423	0.214127	0.998563	ABCB9	N.S.
6109.54	-0.0542895	0.240014	-0.226193	0.821052	0.998563	ABCC1	N.S.
2056.93	-0.161243	0.226394	-0.712222	0.476327	0.998563	ABCC10	N.S.
34.2127	0.221134	0.879453	0.251444	0.801471	0.998563	ABCC11	N.S.
1.80771	-4.26368	4.05722	-1.05089	0.29331	0.998563	ABCC12	N.S.
8.92465	0.924588	1.90034	0.486539	0.626585	0.998563	ABCC2	N.S.
0.263943	1.53742	4.99164	0.307999	0.758083	0.998563	ABCC3	N.S.
2253.67	-0.201671	0.246673	-0.817565	0.413606	0.998563	ABCC4	N.S.
5123.47	0.0068263	0.204456	0.0333876	0.973365	0.999201	ABCC5	N.S.
15.82	1.15753	1.22447	0.945332	0.344489	0.998563	ABCC6	N.S.
287.681	0.284541	0.357418	0.7961	0.425974	0.998563	ABCC8	N.S.
0	NA	NA	NA	NA	NA	ABCC9	N.S.
5623.23	0.0493443	0.200295	0.246358	0.805405	0.998563	ABCD1	N.S.
738.846	-2.73889	0.354163	-7.73341	1.04704e-14	1.71243e-10	ABCD2	padj<0.05 & Downregulated
3231.44	0.0276466	0.216052	0.127962	0.898179	0.999201	ABCD3	N.S.
1941.06	0.0583615	0.23739	0.245847	0.805801	0.998563	ABCD4	N.S.
5901.01	-0.150662	0.204717	-0.735954	0.461759	0.998563	ABCE1	N.S.
11677.4	0.191692	0.201584	0.950931	0.341639	0.998563	ABCF1	N.S.
5861.38	0.0122008	0.206569	0.0590638	0.952901	0.999201	ABCF2	N.S.
4714.33	0.310155	0.206216	1.50403	0.132574	0.998563	ABCF3	N.S.
20.5861	1.51897	1.16516	1.30366	0.19235	0.998563	ABCG1	N.S.
46.4085	-1.05755	0.927252	-1.14052	0.254068	0.998563	ABCG2	N.S.
451.596	-0.121757	0.312418	-0.389726	0.696739	0.998563	ABCG4	N.S.
0.729242	-2.95768	4.85718	-0.608929	0.542572	0.998563	ABCG5	N.S.
0.740078	-0.963028	4.88909	-0.196975	0.843847	0.998563	ABCG8	N.S.
99.8951	-0.260931	0.587105	-0.444436	0.656727	0.998563	ABHD1	N.S.
1040.71	0.0450366	0.272135	0.165494	0.868555	0.999201	ABHD10	N.S.
639.37	0.226196	0.301856	0.749352	0.453645	0.998563	ABHD11	N.S.
3822.43	0.190022	0.205141	0.926301	0.35429	0.998563	ABHD12	N.S.
13.0597	-0.987612	1.54365	-0.639791	0.522308	0.998563	ABHD12B	N.S.
1164.53	-0.00384613	0.248315	-0.015489	0.987642	0.999201	ABHD13	N.S.
1013.97	0.414472	0.258105	1.60583	0.108312	0.998563	ABHD14A	N.S.
48.3811	-0.506066	0.754517	-0.670715	0.502402	0.998563	ABHD14A-ACY1	N.S.
5566.81	-0.16576	0.223834	-0.74055	0.458967	0.998563	ABHD14B	N.S.
4690.97	0.0291253	0.203966	0.142795	0.886452	0.999201	ABHD15	N.S.
1669.89	-0.0126539	0.22542	-0.0561349	0.955234	0.999201	ABHD16A	N.S.
132.981	-0.435036	0.651067	-0.668189	0.504013	0.998563	ABHD16B	N.S.
7896.66	-0.0425226	0.248618	-0.171036	0.864195	0.999135	ABHD17A	N.S.
1261.96	-0.0773384	0.2372	-0.326047	0.744389	0.998563	ABHD17B	N.S.
621.919	-0.0645188	0.278358	-0.231784	0.816706	0.998563	ABHD17C	N.S.
595.552	-0.191926	0.28602	-0.671023	0.502206	0.998563	ABHD18	N.S.
2011.46	-0.243224	0.294899	-0.824771	0.409502	0.998563	ABHD2	N.S.
626.915	0.379284	0.297295	1.27578	0.202032	0.998563	ABHD3	N.S.
38.2944	0.95003	0.844858	1.12449	0.260807	0.998563	ABHD4	N.S.
453.414	0.212161	0.303952	0.698008	0.485172	0.998563	ABHD5	N.S.
745.344	0.094544	0.264982	0.356794	0.721246	0.998563	ABHD6	N.S.
3249.16	0.58472	0.216275	2.70359	0.00685939	0.657981	ABHD8	N.S.
3731.91	-0.0683847	0.211489	-0.323349	0.746431	0.998563	ABI1	N.S.
6434.32	-0.24082	0.22572	-1.0669	0.286018	0.998563	ABI2	N.S.
10.7059	0.990613	1.72139	0.575474	0.564971	0.998563	ABI3	N.S.
10.4479	-1.00805	1.49306	-0.675161	0.499573	0.998563	ABI3BP	N.S.
5769.88	-0.222863	0.215482	-1.03425	0.301019	0.998563	ABL1	N.S.
3072.18	-0.442809	0.260825	-1.69772	0.0895599	0.998563	ABL2	N.S.
309.085	-0.491365	0.380792	-1.29037	0.196921	0.998563	ABLIM1	N.S.
463.624	-0.0409376	0.338325	-0.121001	0.90369	0.999201	ABLIM2	N.S.
128.031	0.0700361	0.498615	0.140461	0.888295	0.999201	ABLIM3	N.S.
0	NA	NA	NA	NA	NA	ABO	N.S.
4246.12	0.0927449	0.225537	0.411217	0.680913	0.998563	ABR	N.S.
1.03734	1.67748	4.85307	0.345653	0.729603	0.998563	ABRA	N.S.
2539.07	-0.0219138	0.231543	-0.0946425	0.924599	0.999201	ABRACL	N.S.
2866.23	0.0842771	0.232614	0.362304	0.717125	0.998563	ABT1	N.S.
794.048	-0.0971973	0.257545	-0.377399	0.705877	0.998563	ABTB1	N.S.
619.997	-0.209665	0.272638	-0.769023	0.44188	0.998563	ABTB2	N.S.
14.0717	7.28746	4.78868	1.52181	0.128057	0.998563	AC002310.11	N.S.
0	NA	NA	NA	NA	NA	AC002310.13	N.S.
121.351	-0.365947	0.532238	-0.687562	0.491729	0.998563	AC002398.9	N.S.
1.47891	-0.917936	4.00597	-0.229142	0.818759	0.998563	AC002985.3	N.S.
0	NA	NA	NA	NA	NA	AC003002.4	N.S.
1.49289	2.37503	4.4466	0.534123	0.593256	0.998563	AC003002.6	N.S.
0	NA	NA	NA	NA	NA	AC003005.4	N.S.
0	NA	NA	NA	NA	NA	AC003006.7	N.S.
0.263943	1.53742	4.99164	0.307999	0.758083	0.998563	AC004076.7	N.S.
1.38606	0.0251604	4.49694	0.00559501	0.995536	0.999327	AC004076.9	N.S.
0.527885	2.54669	4.88912	0.52089	0.602444	0.998563	AC004158.1	N.S.
0	NA	NA	NA	NA	NA	AC004231.7	N.S.
191.809	0.448684	0.398878	1.12487	0.260646	0.998563	AC004381.6	N.S.
4.24725	-0.776156	2.56542	-0.302545	0.762237	0.998563	AC004556.1	N.S.
43.7452	0.300671	0.760537	0.39534	0.692592	0.998563	AC004754.3	N.S.
0	NA	NA	NA	NA	NA	AC004813.1	N.S.
0	NA	NA	NA	NA	NA	AC004824.2	N.S.
0	NA	NA	NA	NA	NA	AC004824.3	N.S.
0	NA	NA	NA	NA	NA	AC004853.1	N.S.
0	NA	NA	NA	NA	NA	AC004953.1	N.S.
0	NA	NA	NA	NA	NA	AC005042.1	N.S.
0	NA	NA	NA	NA	NA	AC005477.1	N.S.
0.246872	1.48875	4.99504	0.298046	0.765668	0.998563	AC005480.1	N.S.
0	NA	NA	NA	NA	NA	AC005779.2	N.S.
4.13638	1.69638	2.9085	0.583251	0.559725	0.998563	AC005943.2	N.S.
0.738973	-0.952606	4.88948	-0.194828	0.845528	0.998563	AC006026.2	N.S.
0	NA	NA	NA	NA	NA	AC006328.4	N.S.
0	NA	NA	NA	NA	NA	AC006386.1	N.S.
0	NA	NA	NA	NA	NA	AC006445.1	N.S.
48.4146	-0.0770397	0.733955	-0.104965	0.916403	0.999201	AC006449.1	N.S.
48.4146	-0.0770397	0.733955	-0.104965	0.916403	0.999201	AC006449.2	N.S.
2.27168	-0.215989	3.65428	-0.0591058	0.952868	0.999201	AC006486.9	N.S.
0	NA	NA	NA	NA	NA	AC006538.4	N.S.
0	NA	NA	NA	NA	NA	AC006994.3	N.S.
213.165	0.468214	0.389287	1.20275	0.229074	0.998563	AC007040.11	N.S.
0	NA	NA	NA	NA	NA	AC007163.2	N.S.
11.7593	-0.83912	2.07635	-0.404132	0.686116	0.998563	AC007192.4	N.S.
0	NA	NA	NA	NA	NA	AC007325.1	N.S.
499.89	0.0564493	0.311033	0.181489	0.855983	0.998563	AC007325.2	N.S.
2280.76	0.232422	0.238677	0.973794	0.330159	0.998563	AC007325.4	N.S.
0	NA	NA	NA	NA	NA	AC007326.1	N.S.
0	NA	NA	NA	NA	NA	AC007557.5	N.S.
2.18772	-4.54228	4.14653	-1.09544	0.273323	0.998563	AC007906.1	N.S.
0.527885	2.54669	4.88912	0.52089	0.602444	0.998563	AC008074.1	N.S.
52.5056	0.568478	3.48552	0.163097	0.870442	0.999201	AC008522.1	N.S.
0	NA	NA	NA	NA	NA	AC008622.1	N.S.
0	NA	NA	NA	NA	NA	AC008641.1	N.S.
0	NA	NA	NA	NA	NA	AC008686.1	N.S.
0	NA	NA	NA	NA	NA	AC008759.1	N.S.
0	NA	NA	NA	NA	NA	AC008810.1	N.S.
0	NA	NA	NA	NA	NA	AC008914.1	N.S.
1.31857	3.86921	4.82671	0.801626	0.42277	0.998563	AC009022.1	N.S.
0.24662	-1.39	4.9962	-0.278211	0.78085	0.998563	AC009060.2	N.S.
0.493497	0.047752	4.99428	0.00956134	0.992371	0.999201	AC009060.3	N.S.
0.510561	2.50281	4.89227	0.511584	0.608942	0.998563	AC009065.4	N.S.
0	NA	NA	NA	NA	NA	AC009121.2	N.S.
554.268	-0.344362	0.313667	-1.09786	0.272265	0.998563	AC009133.22	N.S.
1.94464	-4.37236	4.34505	-1.00628	0.314279	0.998563	AC009133.23	N.S.
9.29884	-1.46084	1.85883	-0.785892	0.431931	0.998563	AC009336.19	N.S.
0	NA	NA	NA	NA	NA	AC009491.1	N.S.
0	NA	NA	NA	NA	NA	AC009491.2	N.S.
0	NA	NA	NA	NA	NA	AC009758.1	N.S.
274.434	0.321693	0.441722	0.728269	0.466449	0.998563	AC009950.1	N.S.
0	NA	NA	NA	NA	NA	AC009977.1	N.S.
0	NA	NA	NA	NA	NA	AC010184.1	N.S.
0.24662	-1.39	4.9962	-0.278211	0.78085	0.998563	AC010287.1	N.S.
0.24662	-1.39	4.9962	-0.278211	0.78085	0.998563	AC010412.1	N.S.
109.322	0.0157613	0.561736	0.0280582	0.977616	0.999201	AC010547.9	N.S.
116.579	-0.927417	0.528697	-1.75416	0.0794038	0.998563	AC010642.1	N.S.
0	NA	NA	NA	NA	NA	AC010646.3	N.S.
0	NA	NA	NA	NA	NA	AC010655.1	N.S.
41.9123	0.564937	0.770644	0.733071	0.463515	0.998563	AC011043.1	N.S.
0.527885	2.54669	4.88912	0.52089	0.602444	0.998563	AC011043.2	N.S.
0	NA	NA	NA	NA	NA	AC011155.1	N.S.
0	NA	NA	NA	NA	NA	AC011295.1	N.S.
0	NA	NA	NA	NA	NA	AC011380.1	N.S.
0	NA	NA	NA	NA	NA	AC011513.3	N.S.
0.919984	-3.29619	4.84263	-0.680661	0.496086	0.998563	AC011530.4	N.S.
0.527885	2.54669	4.88912	0.52089	0.602444	0.998563	AC011841.1	N.S.
0	NA	NA	NA	NA	NA	AC012005.3	N.S.
0	NA	NA	NA	NA	NA	AC012005.4	N.S.
4849.72	0.145931	0.256769	0.568338	0.569806	0.998563	AC012314.2	N.S.
4850.23	0.145923	0.256741	0.568365	0.569787	0.998563	AC012314.3	N.S.
4850.48	0.145772	0.256725	0.567813	0.570162	0.998563	AC012314.5	N.S.
4851.24	0.146197	0.256761	0.56939	0.569092	0.998563	AC012314.6	N.S.
4850.23	0.145923	0.256741	0.568365	0.569787	0.998563	AC012314.7	N.S.
4849.99	0.146079	0.256729	0.569001	0.569355	0.998563	AC012314.9	N.S.
0	NA	NA	NA	NA	NA	AC012363.2	N.S.
0	NA	NA	NA	NA	NA	AC013269.5	N.S.
0	NA	NA	NA	NA	NA	AC013286.1	N.S.
2918.02	-0.280745	0.242799	-1.15629	0.247564	0.998563	AC013461.1	N.S.
3.79269	-0.0894094	2.99209	-0.0298819	0.976161	0.999201	AC015688.3	N.S.
0	NA	NA	NA	NA	NA	AC016142.1	N.S.
0.243081	-1.37948	4.99696	-0.276065	0.782498	0.998563	AC016549.1	N.S.
0	NA	NA	NA	NA	NA	AC016577.1	N.S.
0	NA	NA	NA	NA	NA	AC016734.1	N.S.
0	NA	NA	NA	NA	NA	AC016753.2	N.S.
0	NA	NA	NA	NA	NA	AC017028.10	N.S.
0.246872	1.48875	4.99504	0.298046	0.765668	0.998563	AC017081.1	N.S.
0	NA	NA	NA	NA	NA	AC018512.1	N.S.
0.49324	-2.39199	4.89158	-0.489002	0.62484	0.998563	AC018755.18	N.S.
0	NA	NA	NA	NA	NA	AC018867.1	N.S.
0	NA	NA	NA	NA	NA	AC018902.1	N.S.
0	NA	NA	NA	NA	NA	AC019206.1	N.S.
6.12196	1.63233	2.07887	0.785202	0.432335	0.998563	AC021106.1	N.S.
0	NA	NA	NA	NA	NA	AC022016.1	N.S.
0	NA	NA	NA	NA	NA	AC022210.1	N.S.
0.24662	-1.39	4.9962	-0.278211	0.78085	0.998563	AC022405.1	N.S.
0	NA	NA	NA	NA	NA	AC022819.2	N.S.
0	NA	NA	NA	NA	NA	AC023491.2	N.S.
0	NA	NA	NA	NA	NA	AC024060.1	N.S.
0	NA	NA	NA	NA	NA	AC024361.1	N.S.
176.34	-0.251332	0.450283	-0.558165	0.576731	0.998563	AC024592.12	N.S.
0	NA	NA	NA	NA	NA	AC025263.3	N.S.
2.02407	1.60143	3.50571	0.456805	0.647811	0.998563	AC026248.1	N.S.
0.791828	3.13299	4.85452	0.645375	0.518684	0.998563	AC026369.1	N.S.
0	NA	NA	NA	NA	NA	AC026449.1	N.S.
16.197	0.243349	1.23058	0.197751	0.84324	0.998563	AC037459.4	N.S.
0	NA	NA	NA	NA	NA	AC037482.2	N.S.
0	NA	NA	NA	NA	NA	AC044810.2	N.S.
0.527885	2.54669	4.88912	0.52089	0.602444	0.998563	AC055733.1	N.S.
0	NA	NA	NA	NA	NA	AC055866.1	N.S.
0	NA	NA	NA	NA	NA	AC063956.1	N.S.
0	NA	NA	NA	NA	NA	AC063956.2	N.S.
0	NA	NA	NA	NA	NA	AC064829.1	N.S.
0	NA	NA	NA	NA	NA	AC066615.1	N.S.
28.4424	0.175666	1.08848	0.161387	0.871789	0.999201	AC068533.7	N.S.
0	NA	NA	NA	NA	NA	AC069063.1	N.S.
0.489718	-2.38258	4.89228	-0.487009	0.626252	0.998563	AC069063.2	N.S.
0	NA	NA	NA	NA	NA	AC069368.3	N.S.
0	NA	NA	NA	NA	NA	AC069499.1	N.S.
0	NA	NA	NA	NA	NA	AC073072.1	N.S.
0	NA	NA	NA	NA	NA	AC073130.2	N.S.
0.24662	-1.39	4.9962	-0.278211	0.78085	0.998563	AC073333.1	N.S.
0	NA	NA	NA	NA	NA	AC073610.5	N.S.
0	NA	NA	NA	NA	NA	AC073657.1	N.S.
0	NA	NA	NA	NA	NA	AC074033.1	N.S.
0	NA	NA	NA	NA	NA	AC079355.1	N.S.
0	NA	NA	NA	NA	NA	AC079907.1	N.S.
16.2864	-7.43803	4.78801	-1.55347	0.120311	0.998563	AC084219.2	N.S.
0	NA	NA	NA	NA	NA	AC087350.1	N.S.
0	NA	NA	NA	NA	NA	AC087392.1	N.S.
0	NA	NA	NA	NA	NA	AC087651.1	N.S.
0	NA	NA	NA	NA	NA	AC087651.2	N.S.
0	NA	NA	NA	NA	NA	AC087762.1	N.S.
0	NA	NA	NA	NA	NA	AC090154.1	N.S.
13144.3	0.28078	0.224018	1.25338	0.210067	0.998563	AC090498.1	N.S.
0	NA	NA	NA	NA	NA	AC090958.1	N.S.
0	NA	NA	NA	NA	NA	AC091180.1	N.S.
0	NA	NA	NA	NA	NA	AC091304.2	N.S.
0	NA	NA	NA	NA	NA	AC092159.1	N.S.
0	NA	NA	NA	NA	NA	AC092384.1	N.S.
0	NA	NA	NA	NA	NA	AC092718.1	N.S.
68.4534	-1.22074	0.68271	-1.78809	0.073762	0.998563	AC092835.2	N.S.
1.73389	-2.49955	3.77595	-0.661966	0.507993	0.998563	AC092881.1	N.S.
0	NA	NA	NA	NA	NA	AC100821.2	N.S.
0	NA	NA	NA	NA	NA	AC104057.1	N.S.
0	NA	NA	NA	NA	NA	AC104073.2	N.S.
0	NA	NA	NA	NA	NA	AC104389.1	N.S.
0	NA	NA	NA	NA	NA	AC104389.2	N.S.
2.49423	-0.547002	2.884	-0.189668	0.84957	0.998563	AC104532.2	N.S.
3.42991	0.0428565	3.10258	0.0138132	0.988979	0.999201	AC104534.3	N.S.
0	NA	NA	NA	NA	NA	AC104581.1	N.S.
0	NA	NA	NA	NA	NA	AC104650.2	N.S.
0	NA	NA	NA	NA	NA	AC104981.1	N.S.
0	NA	NA	NA	NA	NA	AC105009.1	N.S.
1.78335	1.34738	3.68498	0.365642	0.714632	0.998563	AC105052.2	N.S.
0	NA	NA	NA	NA	NA	AC107081.1	N.S.
0.254657	-1.42334	4.99064	-0.285202	0.775489	0.998563	AC108925.1	N.S.
1.47972	-3.97751	4.82061	-0.825106	0.409311	0.998563	AC108938.5	N.S.
0	NA	NA	NA	NA	NA	AC109344.1	N.S.
1.23479	-3.71625	4.70066	-0.790581	0.429188	0.998563	AC109486.1	N.S.
0	NA	NA	NA	NA	NA	AC109829.1	N.S.
0	NA	NA	NA	NA	NA	AC109829.2	N.S.
0	NA	NA	NA	NA	NA	AC110602.1	N.S.
0	NA	NA	NA	NA	NA	AC110615.1	N.S.
0	NA	NA	NA	NA	NA	AC112719.2	N.S.
148.004	0.0615938	0.448302	0.137394	0.89072	0.999201	AC113404.1	N.S.
0	NA	NA	NA	NA	NA	AC118758.1	N.S.
0	NA	NA	NA	NA	NA	AC123512.1	N.S.
0	NA	NA	NA	NA	NA	AC123512.2	N.S.
0	NA	NA	NA	NA	NA	AC123512.3	N.S.
0.972322	-3.37255	4.83918	-0.696925	0.48585	0.998563	AC124312.1	N.S.
0	NA	NA	NA	NA	NA	AC126407.1	N.S.
209.346	0.00339035	0.476539	0.00711453	0.994323	0.999201	AC129492.1	N.S.
18.083	-2.01436	1.19782	-1.68168	0.0926302	0.998563	AC130310.1	N.S.
0	NA	NA	NA	NA	NA	AC131263.1	N.S.
4.68578	-5.64057	3.15072	-1.79024	0.0734145	0.998563	AC133551.1	N.S.
0	NA	NA	NA	NA	NA	AC136352.4	N.S.
0	NA	NA	NA	NA	NA	AC136352.5	N.S.
130.091	0.111626	0.472906	0.236043	0.813399	0.998563	AC136612.1	N.S.
920.138	0.201012	0.283236	0.709697	0.477892	0.998563	AC136616.1	N.S.
0	NA	NA	NA	NA	NA	AC136616.2	N.S.
0	NA	NA	NA	NA	NA	AC136616.3	N.S.
0	NA	NA	NA	NA	NA	AC138028.1	N.S.
1862.28	-0.462513	0.249359	-1.85481	0.0636233	0.998563	AC138969.4	N.S.
0	NA	NA	NA	NA	NA	AC141272.1	N.S.
0	NA	NA	NA	NA	NA	AC142525.1	N.S.
579.96	0.166652	0.306074	0.544483	0.586109	0.998563	AC145212.2	N.S.
318.138	0.392231	0.381171	1.02902	0.303472	0.998563	AC145212.4	N.S.
115.933	-0.263894	0.499279	-0.52855	0.597117	0.998563	AC156455.2	N.S.
0	NA	NA	NA	NA	NA	AC171558.1	N.S.
0	NA	NA	NA	NA	NA	AC171558.2	N.S.
0	NA	NA	NA	NA	NA	AC208162.1	N.S.
1.03328	3.51906	4.83821	0.727348	0.467013	0.998563	AC213203.1	N.S.
0	NA	NA	NA	NA	NA	AC231657.1	N.S.
0	NA	NA	NA	NA	NA	AC233755.1	N.S.
0	NA	NA	NA	NA	NA	AC233755.2	N.S.
0.761582	3.08022	4.85707	0.634172	0.525969	0.998563	AC234582.1	N.S.
0.24662	-1.39	4.9962	-0.278211	0.78085	0.998563	AC234582.2	N.S.
0	NA	NA	NA	NA	NA	AC236040.1	N.S.
1686.07	-0.0306264	0.326579	-0.0937795	0.925284	0.999201	AC240274.1	N.S.
4.53272	1.05918	2.17914	0.486054	0.626929	0.998563	AC241377.2	N.S.
281.662	-0.109186	0.430618	-0.253558	0.799837	0.998563	AC241585.2	N.S.
0	NA	NA	NA	NA	NA	AC242988.1	N.S.
16.681	0.164845	1.25907	0.130926	0.895834	0.999201	AC243687.1	N.S.
0	NA	NA	NA	NA	NA	AC243756.1	N.S.
0	NA	NA	NA	NA	NA	AC243790.2	N.S.
0	NA	NA	NA	NA	NA	AC243945.1	N.S.
0	NA	NA	NA	NA	NA	AC245015.1	N.S.
283.466	-0.25778	0.39243	-0.656881	0.511257	0.998563	AC245100.1	N.S.
76.5299	-0.34366	0.593626	-0.578916	0.562646	0.998563	AC253572.1	N.S.
9.9945	0.054628	1.50323	0.0363403	0.971011	0.999201	AC254560.1	N.S.
0	NA	NA	NA	NA	NA	AC254788.1	N.S.
0	NA	NA	NA	NA	NA	AC254847.1	N.S.
0	NA	NA	NA	NA	NA	AC254944.3	N.S.
0	NA	NA	NA	NA	NA	AC254995.1	N.S.
2463.54	0.290453	0.215651	1.34687	0.178022	0.998563	ACAA1	N.S.
3937.18	0.164269	0.212864	0.771709	0.440287	0.998563	ACAA2	N.S.
6063.75	-0.0829127	0.20617	-0.402157	0.687569	0.998563	ACACA	N.S.
1038.43	-0.460641	0.256211	-1.7979	0.0721931	0.998563	ACACB	N.S.
1965.39	-0.128763	0.233686	-0.551009	0.581628	0.998563	ACAD10	N.S.
1718.59	-0.414516	0.258018	-1.60654	0.108156	0.998563	ACAD11	N.S.
1477.79	0.408519	0.243417	1.67827	0.0932942	0.998563	ACAD8	N.S.
1703.46	0.00311917	0.253381	0.0123102	0.990178	0.999201	ACAD9	N.S.
0	NA	NA	NA	NA	NA	ACADL	N.S.
2439.83	0.0797607	0.215205	0.370626	0.710916	0.998563	ACADM	N.S.
357.697	0.0851773	0.359075	0.237213	0.812492	0.998563	ACADS	N.S.
1060.22	-0.255237	0.256079	-0.996712	0.318905	0.998563	ACADSB	N.S.
10096.2	-0.447228	0.279642	-1.59929	0.109757	0.998563	ACADVL	N.S.
9.45209	0.790668	1.94838	0.405809	0.684883	0.998563	ACAN	N.S.
142.117	-0.133646	0.45846	-0.29151	0.770661	0.998563	ACAP1	N.S.
3942.19	-0.270506	0.253632	-1.06653	0.286183	0.998563	ACAP2	N.S.
8159.46	-0.183738	0.20834	-0.881913	0.377824	0.998563	ACAP3	N.S.
4202.72	-0.0608525	0.218507	-0.278492	0.780635	0.998563	ACAT1	N.S.
1189.45	0.209558	0.250765	0.835674	0.403338	0.998563	ACAT2	N.S.
8519.09	-0.0986992	0.23042	-0.428344	0.668401	0.998563	ACBD3	N.S.
1039.7	-0.302006	0.304467	-0.991915	0.321239	0.998563	ACBD4	N.S.
2433.16	0.022826	0.243454	0.0937592	0.9253	0.999201	ACBD5	N.S.
3259.11	0.0976691	0.22166	0.440627	0.659483	0.998563	ACBD6	N.S.
53.1558	0.0132573	0.706664	0.0187604	0.985032	0.999201	ACBD7	N.S.
658.203	-0.492271	0.398223	-1.23617	0.216395	0.998563	ACCS	N.S.
0	NA	NA	NA	NA	NA	ACCSL	N.S.
1245.59	0.378101	0.23436	1.61333	0.106673	0.998563	ACD	N.S.
2.47793	-0.510999	3.00691	-0.169942	0.865056	0.999135	ACE	N.S.
0	NA	NA	NA	NA	NA	ACE2	N.S.
1.48123	4.04104	4.82205	0.838033	0.402012	0.998563	ACER1	N.S.
230.229	-0.359094	0.40962	-0.876651	0.380676	0.998563	ACER2	N.S.
1913.43	-0.170525	0.250808	-0.679905	0.496565	0.998563	ACER3	N.S.
596.188	-0.417969	0.311612	-1.34131	0.179819	0.998563	ACHE	N.S.
8097.72	0.157177	0.201036	0.781833	0.434313	0.998563	ACIN1	N.S.
0	NA	NA	NA	NA	NA	ACKR1	N.S.
35.1524	-0.807288	0.901364	-0.895629	0.370451	0.998563	ACKR2	N.S.
0.263943	1.53742	4.99164	0.307999	0.758083	0.998563	ACKR3	N.S.
3.91466	-2.77689	2.64425	-1.05016	0.293645	0.998563	ACKR4	N.S.
27500.9	-0.111073	0.205555	-0.540357	0.588951	0.998563	ACLY	N.S.
0.845982	-1.40671	4.87293	-0.288678	0.772828	0.998563	ACMSD	N.S.
3698.31	0.0315094	0.20612	0.152869	0.878502	0.999201	ACO1	N.S.
11709.6	0.125704	0.201201	0.624768	0.532123	0.998563	ACO2	N.S.
257.456	0.186888	0.362501	0.515551	0.606168	0.998563	ACOT1	N.S.
655.285	-0.316899	0.275289	-1.15115	0.24967	0.998563	ACOT11	N.S.
4.54567	-2.60784	2.49244	-1.0463	0.295422	0.998563	ACOT12	N.S.
2158.49	0.429224	0.243891	1.7599	0.0784241	0.998563	ACOT13	N.S.
3595.15	0.0937468	0.236415	0.396535	0.69171	0.998563	ACOT2	N.S.
2.00783	2.85437	3.58386	0.796451	0.42577	0.998563	ACOT4	N.S.
3.29853	-0.607889	3.15674	-0.192569	0.847297	0.998563	ACOT6	N.S.
7578.98	-0.0300375	0.232966	-0.128935	0.897409	0.999201	ACOT7	N.S.
741.726	0.307654	0.292842	1.05058	0.293451	0.998563	ACOT8	N.S.
2453.29	-0.236823	0.250178	-0.94662	0.343832	0.998563	ACOT9	N.S.
4009.99	-0.368945	0.205427	-1.79599	0.0724955	0.998563	ACOX1	N.S.
0.883903	0.0959094	4.83299	0.0198447	0.984167	0.999201	ACOX2	N.S.
1054.91	0.163348	0.259402	0.629712	0.528883	0.998563	ACOX3	N.S.
6.72603	-0.473827	1.81581	-0.260946	0.794135	0.998563	ACOXL	N.S.
7224.22	0.281201	0.209586	1.3417	0.179694	0.998563	ACP1	N.S.
2092.5	0.0819355	0.228953	0.35787	0.720441	0.998563	ACP2	N.S.
7.22999	0.00439538	1.79949	0.00244257	0.998051	0.999469	ACP5	N.S.
1404.49	-0.139397	0.250705	-0.55602	0.578197	0.998563	ACP6	N.S.
0	NA	NA	NA	NA	NA	ACP7	N.S.
0.263943	1.53742	4.99164	0.307999	0.758083	0.998563	ACPP	N.S.
0	NA	NA	NA	NA	NA	ACPT	N.S.
12.1684	1.12715	1.57614	0.715133	0.474527	0.998563	ACR	N.S.
23.1334	1.9834	1.083	1.8314	0.0670413	0.998563	ACRBP	N.S.
53.9376	0.549294	0.727861	0.754668	0.450448	0.998563	ACRC	N.S.
3.72446	-4.22399	3.18153	-1.32766	0.18429	0.998563	ACRV1	N.S.
3.68618	-1.98181	2.68125	-0.739134	0.459826	0.998563	ACSBG1	N.S.
0.243081	-1.37948	4.99696	-0.276065	0.782498	0.998563	ACSBG2	N.S.
1636.8	-0.202983	0.233566	-0.869061	0.384814	0.998563	ACSF2	N.S.
1793.14	0.185769	0.234386	0.792576	0.428025	0.998563	ACSF3	N.S.
2383.79	0.100271	0.23486	0.42694	0.669423	0.998563	ACSL1	N.S.
3182.75	-0.0136999	0.220279	-0.0621937	0.950409	0.999201	ACSL3	N.S.
996.3	-0.451807	0.279226	-1.61807	0.105648	0.998563	ACSL4	N.S.
0.791828	3.13299	4.85452	0.645375	0.518684	0.998563	ACSL5	N.S.
90.0016	0.129357	0.568077	0.227711	0.819871	0.998563	ACSL6	N.S.
0.740615	3.04256	4.859	0.62617	0.531204	0.998563	ACSM1	N.S.
0	NA	NA	NA	NA	NA	ACSM2A	N.S.
0	NA	NA	NA	NA	NA	ACSM2B	N.S.
5.77518	1.86179	2.32013	0.802453	0.422291	0.998563	ACSM3	N.S.
0	NA	NA	NA	NA	NA	ACSM4	N.S.
0.24662	-1.39	4.9962	-0.278211	0.78085	0.998563	ACSM5	N.S.
0.791828	3.13299	4.85452	0.645375	0.518684	0.998563	ACSM6	N.S.
0	NA	NA	NA	NA	NA	ACSS1	N.S.
13565.6	-0.160928	0.199356	-0.807236	0.419531	0.998563	ACSS2	N.S.
2.25272	3.5022	3.79601	0.922599	0.356216	0.998563	ACSS3	N.S.
29.477	0.800555	0.914183	0.875705	0.38119	0.998563	ACTA1	N.S.
1900.91	-0.210368	0.28256	-0.744506	0.456571	0.998563	ACTA2	N.S.
175332	-0.177011	0.230937	-0.766493	0.443383	0.998563	ACTB	N.S.
0.24662	-1.39	4.9962	-0.278211	0.78085	0.998563	ACTBL2	N.S.
2.09024	2.91583	3.9122	0.745318	0.45608	0.998563	ACTC1	N.S.
259543	-0.202584	0.189378	-1.06973	0.28474	0.998563	ACTG1	N.S.
0.791828	3.13299	4.85452	0.645375	0.518684	0.998563	ACTG2	N.S.
7.19265	-1.33421	1.77502	-0.751658	0.452257	0.998563	ACTL10	N.S.
2144.94	0.12716	0.221731	0.57349	0.566313	0.998563	ACTL6A	N.S.
11.7236	0.3635	1.50724	0.241169	0.809424	0.998563	ACTL6B	N.S.
0	NA	NA	NA	NA	NA	ACTL7A	N.S.
0.984725	1.60778	4.8583	0.330936	0.740693	0.998563	ACTL7B	N.S.
1.72634	-4.19992	4.56098	-0.920838	0.357135	0.998563	ACTL8	N.S.
0	NA	NA	NA	NA	NA	ACTL9	N.S.
11336.7	-0.143979	0.198329	-0.72596	0.467864	0.998563	ACTN1	N.S.
20.5988	0.805522	1.29841	0.620391	0.535	0.998563	ACTN2	N.S.
7.11495	1.94589	1.8243	1.06665	0.286129	0.998563	ACTN3	N.S.
12558.5	-0.00323523	0.205234	-0.0157636	0.987423	0.999201	ACTN4	N.S.
4449.93	0.306444	0.226721	1.35163	0.176492	0.998563	ACTR10	N.S.
9925.43	-0.00482567	0.195556	-0.0246766	0.980313	0.999201	ACTR1A	N.S.
3526.15	-0.328409	0.241885	-1.35771	0.174557	0.998563	ACTR1B	N.S.
34842.7	-0.181485	0.20664	-0.878266	0.379799	0.998563	ACTR2	N.S.
16057.2	-0.252475	0.195746	-1.28981	0.197118	0.998563	ACTR3	N.S.
369.427	0.202123	0.318452	0.634704	0.525622	0.998563	ACTR3B	N.S.
0	NA	NA	NA	NA	NA	ACTR3C	N.S.
448.794	-0.0466138	0.305388	-0.152638	0.878684	0.999201	ACTR5	N.S.
1206.02	-0.0521098	0.270993	-0.192292	0.847513	0.998563	ACTR6	N.S.
1500.14	-0.121582	0.243645	-0.499014	0.617769	0.998563	ACTR8	N.S.
0	NA	NA	NA	NA	NA	ACTRT1	N.S.
0	NA	NA	NA	NA	NA	ACTRT2	N.S.
340.358	0.193011	0.329845	0.585157	0.558442	0.998563	ACTRT3	N.S.
1350.67	-0.162744	0.242364	-0.671485	0.501912	0.998563	ACVR1	N.S.
1380.41	0.0585384	0.243801	0.240108	0.810247	0.998563	ACVR1B	N.S.
56.4382	-0.131392	0.674653	-0.194755	0.845585	0.998563	ACVR1C	N.S.
1069.6	-0.157572	0.265553	-0.593374	0.552931	0.998563	ACVR2A	N.S.
666.83	-0.414751	0.34741	-1.19384	0.232541	0.998563	ACVR2B	N.S.
2.13942	-0.688562	3.35838	-0.205028	0.83755	0.998563	ACVRL1	N.S.
1439.23	-0.393183	0.327067	-1.20215	0.229307	0.998563	ACY1	N.S.
0	NA	NA	NA	NA	NA	ACY3	N.S.
258.546	0.435695	0.361844	1.2041	0.228552	0.998563	ACYP1	N.S.
476.719	-0.0314207	0.320102	-0.0981586	0.921806	0.999201	ACYP2	N.S.
40.9346	-0.847978	0.840729	-1.00862	0.313156	0.998563	AD000671.6	N.S.
1247.88	0.0518975	0.239482	0.216707	0.828437	0.998563	ADA	N.S.
0.527885	2.54669	4.88912	0.52089	0.602444	0.998563	ADAD1	N.S.
0.527885	2.54669	4.88912	0.52089	0.602444	0.998563	ADAD2	N.S.
236.424	0.24657	0.384644	0.641035	0.5215	0.998563	ADAL	N.S.
4276.2	-0.413746	0.255083	-1.62201	0.104802	0.998563	ADAM10	N.S.
2681.78	-0.103661	0.250315	-0.41412	0.678786	0.998563	ADAM11	N.S.
0.99655	-0.326365	4.74366	-0.0688003	0.945149	0.999201	ADAM12	N.S.
4480.41	-0.0394301	0.209208	-0.188473	0.850506	0.998563	ADAM15	N.S.
4240.71	-0.290064	0.229825	-1.2621	0.206911	0.998563	ADAM17	N.S.
0	NA	NA	NA	NA	NA	ADAM18	N.S.
1320.41	-0.507323	0.238355	-2.12844	0.033301	0.998563	ADAM19	N.S.
0.486161	-2.37303	4.89298	-0.484987	0.627685	0.998563	ADAM2	N.S.
1.24889	2.04375	4.34023	0.470886	0.637722	0.998563	ADAM20	N.S.
3.22942	1.75172	2.90969	0.60203	0.547154	0.998563	ADAM21	N.S.
1035.92	-0.453513	0.269762	-1.68116	0.0927325	0.998563	ADAM22	N.S.
2592.99	-0.684325	0.247017	-2.77036	0.00559944	0.631579	ADAM23	N.S.
0	NA	NA	NA	NA	NA	ADAM28	N.S.
0.717696	-2.93588	4.85847	-0.60428	0.545657	0.998563	ADAM29	N.S.
0	NA	NA	NA	NA	NA	ADAM30	N.S.
6.22954	0.334947	1.89449	0.1768	0.859665	0.998563	ADAM32	N.S.
0.486161	-2.37303	4.89298	-0.484987	0.627685	0.998563	ADAM33	N.S.
0	NA	NA	NA	NA	NA	ADAM7	N.S.
216.239	-0.369194	0.394305	-0.936317	0.34911	0.998563	ADAM8	N.S.
5692.96	-0.120011	0.223223	-0.537626	0.590835	0.998563	ADAM9	N.S.
0.263943	1.53742	4.99164	0.307999	0.758083	0.998563	ADAMDEC1	N.S.
8434.88	-0.532657	0.218678	-2.43581	0.0148587	0.890405	ADAMTS1	N.S.
432.191	0.14744	0.322271	0.457502	0.64731	0.998563	ADAMTS10	N.S.
0	NA	NA	NA	NA	NA	ADAMTS12	N.S.
1216.49	-0.581904	0.287651	-2.02295	0.0430785	0.998563	ADAMTS13	N.S.
51.299	0.125497	0.713531	0.175881	0.860387	0.998767	ADAMTS14	N.S.
204.762	0.122061	0.406432	0.300324	0.76393	0.998563	ADAMTS15	N.S.
0	NA	NA	NA	NA	NA	ADAMTS16	N.S.
47.6476	0.414852	0.884437	0.469057	0.639029	0.998563	ADAMTS17	N.S.
0	NA	NA	NA	NA	NA	ADAMTS18	N.S.
0.791828	3.13299	4.85452	0.645375	0.518684	0.998563	ADAMTS19	N.S.
324.121	-0.853564	0.357879	-2.38507	0.017076	0.924761	ADAMTS2	N.S.
0	NA	NA	NA	NA	NA	ADAMTS20	N.S.
15.7812	0.0572218	1.24529	0.0459504	0.96335	0.999201	ADAMTS3	N.S.
6.70164	-0.713889	1.81755	-0.392776	0.694485	0.998563	ADAMTS4	N.S.
12.838	-0.7881	1.55024	-0.508374	0.611191	0.998563	ADAMTS5	N.S.
549.531	-0.585554	0.31873	-1.83715	0.0661883	0.998563	ADAMTS6	N.S.
4787.49	-0.617443	0.272175	-2.26855	0.0232955	0.998563	ADAMTS7	N.S.
41.338	0.89591	0.78667	1.13886	0.25476	0.998563	ADAMTS8	N.S.
1.57569	2.61302	3.92639	0.665501	0.50573	0.998563	ADAMTS9	N.S.
69.0219	0.00297926	0.630079	0.00472839	0.996227	0.9994	ADAMTSL1	N.S.
0	NA	NA	NA	NA	NA	ADAMTSL2	N.S.
3135.55	-0.668572	0.266687	-2.50696	0.0121775	0.831051	ADAMTSL3	N.S.
2550.44	-0.257093	0.268035	-0.959177	0.33747	0.998563	ADAMTSL4	N.S.
1297.02	-0.0672645	0.263154	-0.255609	0.798253	0.998563	ADAMTSL5	N.S.
2554.95	0.0743324	0.215638	0.344709	0.730313	0.998563	ADAP1	N.S.
2181.95	-0.455359	0.216101	-2.10716	0.035104	0.998563	ADAP2	N.S.
26398.9	-0.455895	0.209756	-2.17346	0.0297459	0.998563	ADAR	N.S.
833.412	-0.252712	0.270142	-0.935479	0.349542	0.998563	ADARB1	N.S.
0	NA	NA	NA	NA	NA	ADARB2	N.S.
906.529	-0.357713	0.250037	-1.43064	0.152533	0.998563	ADAT1	N.S.
286.687	-0.524073	0.382839	-1.36891	0.171027	0.998563	ADAT2	N.S.
999.229	-0.0670558	0.320056	-0.209513	0.834048	0.998563	ADAT3	N.S.
593.612	0.0653729	0.292017	0.223866	0.822861	0.998563	ADCK1	N.S.
3259.22	0.1355	0.218321	0.620646	0.534833	0.998563	ADCK2	N.S.
2995.32	0.225957	0.212676	1.06245	0.288033	0.998563	ADCK3	N.S.
1676.01	-0.145077	0.239131	-0.606686	0.544059	0.998563	ADCK4	N.S.
517.887	-0.225248	0.370088	-0.608634	0.542767	0.998563	ADCK5	N.S.
3425.23	-0.153774	0.235836	-0.652038	0.514377	0.998563	ADCY1	N.S.
2.11613	-4.43984	3.79769	-1.16909	0.242368	0.998563	ADCY10	N.S.
2.11154	4.54942	4.20604	1.08164	0.279412	0.998563	ADCY2	N.S.
3408.44	-0.142041	0.221114	-0.642388	0.520621	0.998563	ADCY3	N.S.
1.47972	-3.97751	4.82061	-0.825106	0.409311	0.998563	ADCY4	N.S.
787.703	0.163119	0.279871	0.582838	0.560002	0.998563	ADCY5	N.S.
5125.69	-0.0553065	0.207243	-0.266867	0.789571	0.998563	ADCY6	N.S.
2678.47	-0.583525	0.287289	-2.03114	0.0422403	0.998563	ADCY7	N.S.
0.739861	-2.97723	4.85622	-0.613076	0.539826	0.998563	ADCY8	N.S.
2794.7	-0.080291	0.306597	-0.261878	0.793416	0.998563	ADCY9	N.S.
0.986481	-3.39241	4.83844	-0.701137	0.483218	0.998563	ADCYAP1	N.S.
136.66	0.080622	0.580745	0.138825	0.889588	0.999201	ADCYAP1R1	N.S.
16427.1	0.0612547	0.200768	0.305102	0.760288	0.998563	ADD1	N.S.
7706.65	-0.622781	0.256301	-2.42988	0.0151038	0.890405	ADD2	N.S.
2237.74	-0.00618325	0.259336	-0.0238426	0.980978	0.999201	ADD3	N.S.
0.49324	-2.39199	4.89158	-0.489002	0.62484	0.998563	ADGB	N.S.
101.189	-0.217338	0.58089	-0.374146	0.708295	0.998563	ADGRA1	N.S.
1355.31	-0.198522	0.234604	-0.846199	0.397442	0.998563	ADGRA2	N.S.
3771.39	-0.0193835	0.21287	-0.0910576	0.927447	0.999201	ADGRA3	N.S.
2581.94	-0.143658	0.274963	-0.522462	0.601349	0.998563	ADGRB1	N.S.
2048.31	-0.166589	0.252376	-0.660084	0.5092	0.998563	ADGRB2	N.S.
24.8293	-0.867419	1.17002	-0.741373	0.458467	0.998563	ADGRB3	N.S.
6.04342	-3.6006	2.146	-1.67782	0.0933826	0.998563	ADGRD1	N.S.
0	NA	NA	NA	NA	NA	ADGRD2	N.S.
1.31971	3.87106	4.82669	0.802012	0.422546	0.998563	ADGRE1	N.S.
15.3841	0.0873492	1.28253	0.068107	0.9457	0.999201	ADGRE2	N.S.
0	NA	NA	NA	NA	NA	ADGRE3	N.S.
6701.68	-0.0230801	0.216119	-0.106794	0.914953	0.999201	ADGRE5	N.S.
0.921888	-3.26307	4.86894	-0.670182	0.502742	0.998563	ADGRF1	N.S.
1.565	0.675874	4.27046	0.158267	0.874246	0.999201	ADGRF2	N.S.
4.99788	3.09742	2.44148	1.26866	0.204562	0.998563	ADGRF3	N.S.
0.49324	-2.39199	4.89158	-0.489002	0.62484	0.998563	ADGRF4	N.S.
71.4067	-0.687515	0.783535	-0.877453	0.38024	0.998563	ADGRF5	N.S.
4.97179	-1.32505	2.38683	-0.555148	0.578793	0.998563	ADGRG1	N.S.
23.1939	0.25183	1.03584	0.243117	0.807915	0.998563	ADGRG2	N.S.
0	NA	NA	NA	NA	NA	ADGRG3	N.S.
0.24662	-1.39	4.9962	-0.278211	0.78085	0.998563	ADGRG4	N.S.
2.83584	-1.74672	2.97859	-0.586425	0.55759	0.998563	ADGRG5	N.S.
6936.17	-0.722812	0.333906	-2.16472	0.0304091	0.998563	ADGRG6	N.S.
0	NA	NA	NA	NA	NA	ADGRG7	N.S.
7179.51	-0.136274	0.202643	-0.672482	0.501277	0.998563	ADGRL1	N.S.
11362.7	-0.209481	0.201522	-1.0395	0.298575	0.998563	ADGRL2	N.S.
22.3623	-0.557376	1.12319	-0.496244	0.619722	0.998563	ADGRL3	N.S.
0	NA	NA	NA	NA	NA	ADGRL4	N.S.
2682.89	0.0214831	0.331778	0.0647513	0.948372	0.999201	ADGRV1	N.S.
0.263943	1.53742	4.99164	0.307999	0.758083	0.998563	ADH1A	N.S.
0	NA	NA	NA	NA	NA	ADH1B	N.S.
0	NA	NA	NA	NA	NA	ADH1C	N.S.
1.2331	-3.71442	4.82775	-0.76939	0.441662	0.998563	ADH4	N.S.
6817.61	-0.0245148	0.208947	-0.117326	0.906602	0.999201	ADH5	N.S.
0.729242	-2.95768	4.85718	-0.608929	0.542572	0.998563	ADH6	N.S.
0	NA	NA	NA	NA	NA	ADH7	N.S.
11.9052	0.728137	1.45218	0.501408	0.616084	0.998563	ADHFE1	N.S.
3419.64	0.0166648	0.234289	0.0711294	0.943295	0.999201	ADI1	N.S.
0	NA	NA	NA	NA	NA	ADIG	N.S.
0	NA	NA	NA	NA	NA	ADIPOQ	N.S.
9132.47	0.33375	0.206641	1.61511	0.106286	0.998563	ADIPOR1	N.S.
5095.44	0.0976954	0.213316	0.457985	0.646963	0.998563	ADIPOR2	N.S.
0.791828	3.13299	4.85452	0.645375	0.518684	0.998563	ADIRF	N.S.
1460.55	0.294925	0.233169	1.26486	0.205922	0.998563	ADK	N.S.
3019.77	-0.179254	0.249204	-0.719307	0.471952	0.998563	ADM	N.S.
1.47314	-3.97127	4.3629	-0.910237	0.362698	0.998563	ADM2	N.S.
58.3509	0.543338	0.672279	0.808202	0.418974	0.998563	ADM5	N.S.
3153.87	-0.299362	0.218129	-1.37241	0.169937	0.998563	ADNP	N.S.
2470.27	-0.227201	0.234778	-0.967726	0.333181	0.998563	ADNP2	N.S.
2435.42	0.0562562	0.215414	0.261154	0.793974	0.998563	ADO	N.S.
80.1561	0.354346	0.649208	0.545813	0.585194	0.998563	ADORA1	N.S.
26.8632	1.11163	0.994399	1.11789	0.263612	0.998563	ADORA2A	N.S.
514.099	0.0510256	0.287696	0.177359	0.859226	0.998563	ADORA2B	N.S.
0	NA	NA	NA	NA	NA	ADORA3	N.S.
2955.67	-0.106165	0.220336	-0.481829	0.629927	0.998563	ADPGK	N.S.
0	NA	NA	NA	NA	NA	ADPRH	N.S.
1343.92	0.231774	0.25645	0.903776	0.366114	0.998563	ADPRHL1	N.S.
2433.42	-0.0256701	0.230245	-0.111491	0.911227	0.999201	ADPRHL2	N.S.
335.049	0.493483	0.338539	1.45768	0.144928	0.998563	ADPRM	N.S.
0	NA	NA	NA	NA	NA	ADRA1A	N.S.
1.48084	1.00595	4.3789	0.229726	0.818305	0.998563	ADRA1B	N.S.
33.5872	-0.827654	0.955221	-0.866454	0.386241	0.998563	ADRA1D	N.S.
7.39224	-3.12491	1.91458	-1.63216	0.102645	0.998563	ADRA2A	N.S.
40.5956	0.0092288	0.861688	0.0107101	0.991455	0.999201	ADRA2B	N.S.
4745.82	0.175216	0.217273	0.806433	0.419993	0.998563	ADRA2C	N.S.
4.49121	1.05754	2.46665	0.428736	0.668116	0.998563	ADRB1	N.S.
0.527885	2.54669	4.88912	0.52089	0.602444	0.998563	ADRB2	N.S.
0	NA	NA	NA	NA	NA	ADRB3	N.S.
4423.24	-0.0124441	0.212393	-0.0585901	0.953279	0.999201	ADRBK1	N.S.
1488.42	-0.290766	0.239134	-1.21591	0.224019	0.998563	ADRBK2	N.S.
10646.4	0.142834	0.200698	0.711685	0.47666	0.998563	ADRM1	N.S.
4979.37	0.150246	0.212941	0.705576	0.480452	0.998563	ADSL	N.S.
2296.8	-0.131576	0.23382	-0.562725	0.573622	0.998563	ADSS	N.S.
1037.34	0.305545	0.243012	1.25732	0.208636	0.998563	ADSSL1	N.S.
0.527885	2.54669	4.88912	0.52089	0.602444	0.998563	ADTRP	N.S.
0	NA	NA	NA	NA	NA	AEBP1	N.S.
1859.68	-0.0581538	0.245813	-0.236577	0.812985	0.998563	AEBP2	N.S.
6369.58	0.122093	0.203853	0.598926	0.549223	0.998563	AEN	N.S.
25036.3	0.0446705	0.216959	0.205893	0.836874	0.998563	AES	N.S.
217.926	-0.37709	0.437549	-0.861823	0.388785	0.998563	AF011889.5	N.S.
0.243081	-1.37948	4.99696	-0.276065	0.782498	0.998563	AF111168.2	N.S.
27.0208	1.47216	1.13504	1.29701	0.194628	0.998563	AF131216.1	N.S.
0.493744	2.45901	4.89559	0.50229	0.615464	0.998563	AF165138.7	N.S.
2421.89	-0.211369	0.261854	-0.807203	0.41955	0.998563	AFAP1	N.S.
1857.03	-0.289073	0.220453	-1.31127	0.189766	0.998563	AFAP1L1	N.S.
44.505	0.171926	0.813817	0.211259	0.832685	0.998563	AFAP1L2	N.S.
1310.08	-0.694646	0.285459	-2.43343	0.0149563	0.890405	AFF1	N.S.
2.3726	1.18019	3.23436	0.36489	0.715193	0.998563	AFF2	N.S.
96.4228	0.404686	0.662128	0.61119	0.541074	0.998563	AFF3	N.S.
10248.7	-0.515229	0.303818	-1.69585	0.0899146	0.998563	AFF4	N.S.
6201.69	0.171222	0.208035	0.823044	0.410483	0.998563	AFG3L2	N.S.
0	NA	NA	NA	NA	NA	AFM	N.S.
1817.79	0.424357	0.241245	1.75903	0.0785732	0.998563	AFMID	N.S.
0	NA	NA	NA	NA	NA	AFP	N.S.
1491.22	0.0352946	0.249545	0.141436	0.887526	0.999201	AFTPH	N.S.
362.174	0.249203	0.345991	0.72026	0.471365	0.998563	AGA	N.S.
2632.4	-0.491463	0.221263	-2.22117	0.0263394	0.998563	AGAP1	N.S.
33.858	-0.11565	0.858878	-0.134653	0.892886	0.999201	AGAP14P	N.S.
2896.13	-0.247997	0.22427	-1.1058	0.268815	0.998563	AGAP2	N.S.
4737.86	0.321351	0.224097	1.43398	0.151578	0.998563	AGAP3	N.S.
194.1	0.386517	0.426248	0.906789	0.364519	0.998563	AGAP4	N.S.
72.38	-0.047803	0.792585	-0.0603128	0.951907	0.999201	AGAP5	N.S.
572.072	0.21478	0.292653	0.733908	0.463005	0.998563	AGAP6	N.S.
166.816	-0.194065	0.436623	-0.444469	0.656704	0.998563	AGAP9	N.S.
0	NA	NA	NA	NA	NA	AGBL1	N.S.
42.6307	0.345832	0.814842	0.424417	0.671262	0.998563	AGBL2	N.S.
67.1165	0.234806	0.644007	0.364601	0.715409	0.998563	AGBL3	N.S.
36.4868	0.133905	0.924018	0.144916	0.884777	0.999201	AGBL4	N.S.
6394.75	0.0212222	0.200105	0.106055	0.915539	0.999201	AGBL5	N.S.
40.6392	-0.278771	0.85312	-0.326766	0.743845	0.998563	AGER	N.S.
4353.65	-0.0607189	0.207809	-0.292186	0.770144	0.998563	AGFG1	N.S.
450.334	0.179604	0.306903	0.585214	0.558404	0.998563	AGFG2	N.S.
3102.75	-0.0816463	0.215841	-0.37827	0.70523	0.998563	AGGF1	N.S.
1134.23	-0.125523	0.272127	-0.461267	0.644607	0.998563	AGK	N.S.
1863.23	-0.212786	0.249893	-0.851511	0.394485	0.998563	AGL	N.S.
10.9017	1.79559	1.53065	1.17309	0.240759	0.998563	AGMAT	N.S.
7.97425	0.897571	1.86003	0.482558	0.629409	0.998563	AGMO	N.S.
3449.58	-0.231243	0.255958	-0.903441	0.366292	0.998563	AGO1	N.S.
4286.88	-0.600816	0.254018	-2.36525	0.0180178	0.941474	AGO2	N.S.
1479.66	-0.576288	0.278554	-2.06886	0.0385596	0.998563	AGO3	N.S.
1313.93	-0.245649	0.248423	-0.988836	0.322744	0.998563	AGO4	N.S.
8363.29	0.091313	0.209297	0.436285	0.66263	0.998563	AGPAT1	N.S.
4181.91	0.305188	0.208301	1.46513	0.142886	0.998563	AGPAT2	N.S.
3760.97	-0.103228	0.222263	-0.464442	0.642331	0.998563	AGPAT3	N.S.
1880.98	-0.0422961	0.220097	-0.19217	0.847609	0.998563	AGPAT4	N.S.
1528.61	-0.0226459	0.233346	-0.0970486	0.922688	0.999201	AGPAT5	N.S.
6234.56	-0.442448	0.211862	-2.08838	0.0367633	0.998563	AGPS	N.S.
0	NA	NA	NA	NA	NA	AGR2	N.S.
0	NA	NA	NA	NA	NA	AGR3	N.S.
21796.6	-0.594795	0.277306	-2.14491	0.0319601	0.998563	AGRN	N.S.
0	NA	NA	NA	NA	NA	AGRP	N.S.
0.263943	1.53742	4.99164	0.307999	0.758083	0.998563	AGT	N.S.
1841.54	-0.0920728	0.24786	-0.371471	0.710287	0.998563	AGTPBP1	N.S.
1.25326	-0.349545	4.26198	-0.0820146	0.934635	0.999201	AGTR1	N.S.
1.26894	3.8166	4.64622	0.821442	0.411395	0.998563	AGTR2	N.S.
3381.26	0.222997	0.237493	0.938961	0.347751	0.998563	AGTRAP	N.S.
0	NA	NA	NA	NA	NA	AGXT	N.S.
0	NA	NA	NA	NA	NA	AGXT2	N.S.
6663.36	-0.443641	0.256673	-1.72843	0.0839106	0.998563	AHCTF1	N.S.
33179.1	0.0462249	0.202714	0.22803	0.819623	0.998563	AHCY	N.S.
5500.84	-0.301314	0.220363	-1.36736	0.171514	0.998563	AHCYL1	N.S.
1721.61	-0.318776	0.242431	-1.31491	0.18854	0.998563	AHCYL2	N.S.
1313.69	0.259849	0.264747	0.981501	0.326346	0.998563	AHDC1	N.S.
658.304	0.0227951	0.28253	0.0806819	0.935695	0.999201	AHI1	N.S.
33907.8	-0.786165	0.250814	-3.13445	0.00172174	0.347736	AHNAK	N.S.
3493.56	-0.130029	0.209375	-0.621033	0.534578	0.998563	AHNAK2	N.S.
26.2152	0.125257	1.04066	0.120363	0.904196	0.999201	AHR	N.S.
1483.62	-0.033146	0.288754	-0.11479	0.908612	0.999201	AHRR	N.S.
8187.73	0.243508	0.200429	1.21493	0.224393	0.998563	AHSA1	N.S.
2206.81	0.0358215	0.277449	0.12911	0.897271	0.999201	AHSA2	N.S.
2.33075	1.21003	3.31117	0.36544	0.714783	0.998563	AHSG	N.S.
0	NA	NA	NA	NA	NA	AHSP	N.S.
0.527885	2.54669	4.88912	0.52089	0.602444	0.998563	AICDA	N.S.
6179.44	-0.166009	0.20242	-0.820123	0.412146	0.998563	AIDA	N.S.
0	NA	NA	NA	NA	NA	AIF1	N.S.
545.914	-0.0420326	0.310983	-0.135161	0.892485	0.999201	AIF1L	N.S.
8021.8	0.12297	0.207493	0.592648	0.553417	0.998563	AIFM1	N.S.
68.6212	0.383175	0.663545	0.577467	0.563624	0.998563	AIFM2	N.S.
105.723	0.145313	0.518908	0.280036	0.77945	0.998563	AIFM3	N.S.
2252.34	0.328368	0.224448	1.463	0.143467	0.998563	AIG1	N.S.
16.2799	-0.3296	1.2139	-0.271521	0.78599	0.998563	AIM1	N.S.
47.076	0.300434	0.880498	0.341209	0.732946	0.998563	AIM1L	N.S.
0	NA	NA	NA	NA	NA	AIM2	N.S.
1687.33	0.43246	0.235464	1.83663	0.066265	0.998563	AIMP1	N.S.
1956.31	0.272816	0.249294	1.09436	0.273798	0.998563	AIMP2	N.S.
3124.5	0.40461	0.247061	1.63769	0.101486	0.998563	AIP	N.S.
0	NA	NA	NA	NA	NA	AIPL1	N.S.
0.263943	1.53742	4.99164	0.307999	0.758083	0.998563	AIRE	N.S.
0	NA	NA	NA	NA	NA	AJ239318.1	N.S.
24.5029	-0.969922	1.01771	-0.953048	0.340566	0.998563	AJAP1	N.S.
4077.41	0.0210126	0.214224	0.0980872	0.921863	0.999201	AJUBA	N.S.
3644.33	0.247421	0.226553	1.09211	0.274785	0.998563	AK1	N.S.
4998.97	0.0442799	0.216803	0.20424	0.838166	0.998563	AK2	N.S.
4616.31	-0.114591	0.213298	-0.537236	0.591105	0.998563	AK3	N.S.
1273.92	-0.692729	0.236106	-2.93397	0.00334653	0.521262	AK4	N.S.
4.32801	-1.8714	2.50609	-0.746739	0.455221	0.998563	AK5	N.S.
1968.6	0.275668	0.220744	1.24881	0.211733	0.998563	AK6	N.S.
172.806	-0.373362	0.438576	-0.851306	0.394599	0.998563	AK7	N.S.
70.3843	-0.0293635	0.621575	-0.0472405	0.962322	0.999201	AK8	N.S.
385.363	-0.222834	0.413193	-0.539297	0.589682	0.998563	AK9	N.S.
2502.67	0.239995	0.238275	1.00722	0.313831	0.998563	AKAP1	N.S.
1389.37	-0.0982742	0.234147	-0.419712	0.674696	0.998563	AKAP10	N.S.
2757.23	-0.412984	0.249702	-1.65391	0.0981468	0.998563	AKAP11	N.S.
7316.25	-0.444457	0.255744	-1.7379	0.0822289	0.998563	AKAP12	N.S.
4014.91	-0.439622	0.242888	-1.80998	0.0702994	0.998563	AKAP13	N.S.
1.2331	-3.71442	4.82775	-0.76939	0.441662	0.998563	AKAP14	N.S.
1791.93	0.291307	0.243686	1.19542	0.231923	0.998563	AKAP17A	N.S.
1172.41	-0.68663	0.257954	-2.66183	0.00777173	0.690797	AKAP2	N.S.
148.101	0.227768	0.498912	0.456529	0.64801	0.998563	AKAP3	N.S.
0	NA	NA	NA	NA	NA	AKAP4	N.S.
386.868	-0.0493413	0.341362	-0.144542	0.885072	0.999201	AKAP5	N.S.
211.223	0.125083	0.465997	0.26842	0.788376	0.998563	AKAP6	N.S.
239.614	0.334	0.375514	0.889448	0.373762	0.998563	AKAP7	N.S.
1898.5	-0.256592	0.224941	-1.14071	0.253992	0.998563	AKAP8	N.S.
6277.52	0.332867	0.227342	1.46417	0.143147	0.998563	AKAP8L	N.S.
2714.15	-0.0139143	0.23581	-0.0590066	0.952947	0.999201	AKAP9	N.S.
1890.91	0.163709	0.228998	0.714894	0.474675	0.998563	AKIP1	N.S.
7794.07	-0.0985224	0.199765	-0.493191	0.621877	0.998563	AKIRIN1	N.S.
1886.49	-0.119158	0.241545	-0.493315	0.62179	0.998563	AKIRIN2	N.S.
343.569	-0.369633	0.336835	-1.09737	0.272479	0.998563	AKNA	N.S.
0	NA	NA	NA	NA	NA	AKNAD1	N.S.
5066.9	-0.167939	0.223464	-0.751524	0.452337	0.998563	AKR1A1	N.S.
6189.75	0.116318	0.215577	0.539567	0.589495	0.998563	AKR1B1	N.S.
0	NA	NA	NA	NA	NA	AKR1B10	N.S.
0	NA	NA	NA	NA	NA	AKR1B15	N.S.
25.0361	-0.679256	1.0368	-0.655146	0.512374	0.998563	AKR1C1	N.S.
4.76098	0.114388	2.48124	0.0461014	0.963229	0.999201	AKR1C2	N.S.
3.82305	-0.121782	2.65104	-0.0459374	0.96336	0.999201	AKR1C3	N.S.
0	NA	NA	NA	NA	NA	AKR1C4	N.S.
0	NA	NA	NA	NA	NA	AKR1D1	N.S.
969.975	-0.579055	0.285968	-2.02489	0.0428783	0.998563	AKR1E2	N.S.
4099.48	-0.024032	0.23448	-0.102491	0.918367	0.999201	AKR7A2	N.S.
18.6324	0.702138	1.13632	0.617903	0.536639	0.998563	AKR7A3	N.S.
8612.28	-0.0676611	0.19734	-0.342866	0.731699	0.998563	AKT1	N.S.
11611.4	0.326365	0.208665	1.56406	0.117803	0.998563	AKT1S1	N.S.
6774.67	-0.265449	0.198972	-1.3341	0.18217	0.998563	AKT2	N.S.
4698.1	-0.615867	0.237357	-2.59469	0.00946776	0.769853	AKT3	N.S.
1415.74	-0.0706937	0.229669	-0.307806	0.75823	0.998563	AKTIP	N.S.
0	NA	NA	NA	NA	NA	AL008723.1	N.S.
4.98789	-5.73007	2.79244	-2.05199	0.0401705	0.998563	AL021546.6	N.S.
0	NA	NA	NA	NA	NA	AL022578.1	N.S.
4.50205	1.86139	2.46914	0.75386	0.450933	0.998563	AL023806.1	N.S.
0	NA	NA	NA	NA	NA	AL023875.1	N.S.
0.732379	-0.938063	4.89071	-0.191805	0.847895	0.998563	AL049794.1	N.S.
0	NA	NA	NA	NA	NA	AL049872.1	N.S.
0.243081	-1.37948	4.99696	-0.276065	0.782498	0.998563	AL109927.1	N.S.
0	NA	NA	NA	NA	NA	AL133335.1	N.S.
0	NA	NA	NA	NA	NA	AL133475.1	N.S.
0.254657	-1.42334	4.99064	-0.285202	0.775489	0.998563	AL135745.1	N.S.
0	NA	NA	NA	NA	NA	AL135842.1	N.S.
3.50807	1.40652	2.58397	0.544326	0.586217	0.998563	AL136097.1	N.S.
0	NA	NA	NA	NA	NA	AL137164.1	N.S.
0.246872	1.48875	4.99504	0.298046	0.765668	0.998563	AL137860.1	N.S.
0	NA	NA	NA	NA	NA	AL138706.2	N.S.
0	NA	NA	NA	NA	NA	AL138751.1	N.S.
0	NA	NA	NA	NA	NA	AL139333.1	N.S.
0	NA	NA	NA	NA	NA	AL158839.1	N.S.
0	NA	NA	NA	NA	NA	AL162426.1	N.S.
261.802	-0.351627	0.376868	-0.933025	0.350807	0.998563	AL354822.1	N.S.
0	NA	NA	NA	NA	NA	AL354828.1	N.S.
0	NA	NA	NA	NA	NA	AL354828.2	N.S.
0	NA	NA	NA	NA	NA	AL356131.3	N.S.
0	NA	NA	NA	NA	NA	AL356135.1	N.S.
0	NA	NA	NA	NA	NA	AL356289.1	N.S.
2.02586	0.0907209	3.45508	0.0262573	0.979052	0.999201	AL356585.2	N.S.
2.02586	0.0907209	3.45508	0.0262573	0.979052	0.999201	AL356585.3	N.S.
0	NA	NA	NA	NA	NA	AL357140.1	N.S.
11.3582	-0.384707	1.62497	-0.236747	0.812853	0.998563	AL358852.1	N.S.
0	NA	NA	NA	NA	NA	AL360294.1	N.S.
54.6488	-0.18351	0.716204	-0.256226	0.797776	0.998563	AL365181.2	N.S.
0	NA	NA	NA	NA	NA	AL365202.1	N.S.
0	NA	NA	NA	NA	NA	AL365273.1	N.S.
0	NA	NA	NA	NA	NA	AL445183.1	N.S.
0	NA	NA	NA	NA	NA	AL513412.1	N.S.
805.554	0.379607	0.348013	1.09078	0.275369	0.998563	AL513523.1	N.S.
805.803	0.380393	0.348077	1.09284	0.274464	0.998563	AL513523.2	N.S.
1143.27	-0.182284	0.278395	-0.654768	0.512617	0.998563	AL589743.1	N.S.
0	NA	NA	NA	NA	NA	AL590235.1	N.S.
0	NA	NA	NA	NA	NA	AL591806.1	N.S.
14.6907	0.225554	1.27916	0.17633	0.860035	0.998657	AL592183.1	N.S.
0	NA	NA	NA	NA	NA	AL596220.1	N.S.
0	NA	NA	NA	NA	NA	AL645728.1	N.S.
0	NA	NA	NA	NA	NA	AL645922.1	N.S.
0	NA	NA	NA	NA	NA	AL662852.1	N.S.
12.1732	-1.22933	1.4192	-0.866214	0.386373	0.998563	AL928654.7	N.S.
0	NA	NA	NA	NA	NA	AL929561.1	N.S.
2665.81	0.170338	0.236554	0.72008	0.471476	0.998563	ALAD	N.S.
4066.42	0.34221	0.218253	1.56795	0.116892	0.998563	ALAS1	N.S.
0	NA	NA	NA	NA	NA	ALAS2	N.S.
0	NA	NA	NA	NA	NA	ALB	N.S.
117118	-0.248411	0.199937	-1.24245	0.21407	0.998563	ALCAM	N.S.
1011.4	-0.0456849	0.320795	-0.142412	0.886755	0.999201	ALDH16A1	N.S.
6038.67	-0.156701	0.202995	-0.771944	0.440148	0.998563	ALDH18A1	N.S.
83155.7	-0.180463	0.317497	-0.568394	0.569768	0.998563	ALDH1A1	N.S.
7.77038	-1.24512	2.05954	-0.604563	0.54547	0.998563	ALDH1A2	N.S.
1777.19	-0.102192	0.224086	-0.456038	0.648363	0.998563	ALDH1A3	N.S.
3005.12	-0.185531	0.249873	-0.742501	0.457784	0.998563	ALDH1B1	N.S.
0.263943	1.53742	4.99164	0.307999	0.758083	0.998563	ALDH1L1	N.S.
976.225	-0.57313	0.304418	-1.88271	0.0597402	0.998563	ALDH1L2	N.S.
30.209	1.51982	0.93285	1.62922	0.103267	0.998563	ALDH2	N.S.
42.8922	-0.0417196	0.787572	-0.0529725	0.957754	0.999201	ALDH3A1	N.S.
3694.31	-0.158509	0.206367	-0.768094	0.442431	0.998563	ALDH3A2	N.S.
198.484	0.089941	0.419228	0.21454	0.830126	0.998563	ALDH3B1	N.S.
1.31971	3.87106	4.82669	0.802012	0.422546	0.998563	ALDH3B2	N.S.
4200.95	-0.0692897	0.221994	-0.312124	0.754946	0.998563	ALDH4A1	N.S.
3249.28	-0.148639	0.212737	-0.698698	0.484741	0.998563	ALDH5A1	N.S.
707.224	0.515451	0.300886	1.71311	0.0866923	0.998563	ALDH6A1	N.S.
2891.46	-0.237324	0.259242	-0.915453	0.359954	0.998563	ALDH7A1	N.S.
14.5502	0.678553	1.39172	0.487565	0.625858	0.998563	ALDH8A1	N.S.
4064.63	0.1546	0.203936	0.758081	0.448403	0.998563	ALDH9A1	N.S.
27272.4	0.0380141	0.202302	0.187907	0.850949	0.998563	ALDOA	N.S.
2.25702	-1.72212	3.69737	-0.465768	0.641381	0.998563	ALDOB	N.S.
37.5995	0.00814433	0.876797	0.00928873	0.992589	0.999201	ALDOC	N.S.
1751.51	0.411965	0.229776	1.7929	0.0729891	0.998563	ALG1	N.S.
183.635	0.103956	0.458241	0.22686	0.820533	0.998563	ALG10	N.S.
718.841	-0.651284	0.28018	-2.32452	0.0200978	0.965153	ALG10B	N.S.
616.004	-0.228032	0.318799	-0.715286	0.474432	0.998563	ALG11	N.S.
2675.01	0.0955286	0.218798	0.436607	0.662397	0.998563	ALG12	N.S.
1647.74	0.0736119	0.247263	0.297707	0.765926	0.998563	ALG13	N.S.
262.226	1.56474	0.549582	2.84715	0.00441123	0.581495	ALG14	N.S.
1.94226	-4.37076	3.89767	-1.12138	0.262128	0.998563	ALG1L	N.S.
0	NA	NA	NA	NA	NA	ALG1L2	N.S.
2349.29	0.177181	0.220244	0.804478	0.421121	0.998563	ALG2	N.S.
2249.08	0.0831531	0.237386	0.350287	0.726124	0.998563	ALG3	N.S.
1144.35	0.332545	0.245766	1.3531	0.176024	0.998563	ALG5	N.S.
958.819	0.325934	0.246137	1.32419	0.185438	0.998563	ALG6	N.S.
1036.76	0.316327	0.254471	1.24307	0.21384	0.998563	ALG8	N.S.
751.749	0.191298	0.280145	0.682855	0.494699	0.998563	ALG9	N.S.
0.527885	2.54669	4.88912	0.52089	0.602444	0.998563	ALK	N.S.
776.238	0.267284	0.259255	1.03097	0.302555	0.998563	ALKBH1	N.S.
1527.53	0.0940336	0.242989	0.386987	0.698766	0.998563	ALKBH2	N.S.
597.419	0.149767	0.303702	0.49314	0.621914	0.998563	ALKBH3	N.S.
1443.61	0.188398	0.238707	0.789243	0.42997	0.998563	ALKBH4	N.S.
6711.63	0.200207	0.219789	0.910907	0.362345	0.998563	ALKBH5	N.S.
849.137	0.156463	0.303843	0.514945	0.606591	0.998563	ALKBH6	N.S.
1511.78	0.0735932	0.279397	0.2634	0.792242	0.998563	ALKBH7	N.S.
858.882	0.103232	0.311231	0.331689	0.740124	0.998563	ALKBH8	N.S.
0	NA	NA	NA	NA	NA	ALLC	N.S.
1442.96	0.285404	0.233623	1.22164	0.221843	0.998563	ALMS1	N.S.
1.98443	-2.73298	3.58294	-0.762776	0.445597	0.998563	ALOX12	N.S.
56.0255	0.174201	0.693711	0.251115	0.801725	0.998563	ALOX12B	N.S.
4.84239	0.917436	2.18553	0.419778	0.674648	0.998563	ALOX15	N.S.
2.48628	-4.72985	3.5129	-1.34642	0.178166	0.998563	ALOX15B	N.S.
0.739861	-2.97723	4.85622	-0.613076	0.539826	0.998563	ALOX5	N.S.
0.527885	2.54669	4.88912	0.52089	0.602444	0.998563	ALOX5AP	N.S.
96.5745	-0.693429	0.563362	-1.23088	0.218369	0.998563	ALOXE3	N.S.
0	NA	NA	NA	NA	NA	ALPI	N.S.
20.8326	-0.514285	1.13907	-0.451494	0.651634	0.998563	ALPK1	N.S.
0	NA	NA	NA	NA	NA	ALPK2	N.S.
17.2993	1.2468	1.35536	0.919901	0.357624	0.998563	ALPK3	N.S.
1221.49	-0.109021	0.258016	-0.422534	0.672635	0.998563	ALPL	N.S.
0	NA	NA	NA	NA	NA	ALPP	N.S.
0.24662	-1.39	4.9962	-0.278211	0.78085	0.998563	ALPPL2	N.S.
3114.05	-0.288923	0.232924	-1.24042	0.21482	0.998563	ALS2	N.S.
1198.13	-0.331132	0.241599	-1.37058	0.170504	0.998563	ALS2CL	N.S.
2.16022	2.39971	3.15092	0.761591	0.446304	0.998563	ALS2CR11	N.S.
5.5428	-0.27873	2.04125	-0.136549	0.891387	0.999201	ALS2CR12	N.S.
0.974196	-3.37519	4.83909	-0.697484	0.4855	0.998563	ALX1	N.S.
0.486161	-2.37303	4.89298	-0.484987	0.627685	0.998563	ALX3	N.S.
552.427	0.0291862	0.373141	0.0782178	0.937655	0.999201	ALX4	N.S.
6204.71	0.0766981	0.229673	0.333946	0.738421	0.998563	ALYREF	N.S.
1124.02	-0.0586625	0.255506	-0.229594	0.818408	0.998563	AMACR	N.S.
0	NA	NA	NA	NA	NA	AMBN	N.S.
0	NA	NA	NA	NA	NA	AMBP	N.S.
3437.64	0.18451	0.208582	0.88459	0.376378	0.998563	AMBRA1	N.S.
2564.84	0.217679	0.248392	0.876355	0.380837	0.998563	AMD1	N.S.
159.774	-0.181205	0.497684	-0.364096	0.715786	0.998563	AMDHD1	N.S.
3104.18	-0.150638	0.254871	-0.591039	0.554494	0.998563	AMDHD2	N.S.
0	NA	NA	NA	NA	NA	AMELX	N.S.
0	NA	NA	NA	NA	NA	AMELY	N.S.
907.151	-0.437067	0.268746	-1.62632	0.103881	0.998563	AMER1	N.S.
0	NA	NA	NA	NA	NA	AMER2	N.S.
2.13396	-1.31478	3.4394	-0.382272	0.70226	0.998563	AMER3	N.S.
8237.3	0.289993	0.204725	1.4165	0.156629	0.998563	AMFR	N.S.
249.127	-0.316922	0.37579	-0.843348	0.399034	0.998563	AMH	N.S.
0.263943	1.53742	4.99164	0.307999	0.758083	0.998563	AMHR2	N.S.
1538.88	0.296081	0.267945	1.10501	0.269156	0.998563	AMIGO1	N.S.
42.5184	-0.0261015	0.812583	-0.0321216	0.974375	0.999201	AMIGO2	N.S.
45.8586	8.9933	1.73884	5.17202	2.31572e-07	0.000420818	AMIGO3	padj<0.05 & Upregulated
756.757	-0.599361	0.272095	-2.20276	0.0276115	0.998563	AMMECR1	N.S.
4916.02	-0.18821	0.221042	-0.851464	0.394512	0.998563	AMMECR1L	N.S.
15.5193	1.43343	1.26026	1.13741	0.255367	0.998563	AMN	N.S.
398.978	0.389037	0.309107	1.25858	0.20818	0.998563	AMN1	N.S.
798.617	-0.833135	0.372942	-2.23395	0.0254864	0.998563	AMOT	N.S.
3388.77	-0.354541	0.243028	-1.45885	0.144607	0.998563	AMOTL1	N.S.
5221.81	-0.425935	0.207316	-2.05452	0.0399256	0.998563	AMOTL2	N.S.
0	NA	NA	NA	NA	NA	AMPD1	N.S.
3493.33	-0.150813	0.26068	-0.578536	0.562902	0.998563	AMPD2	N.S.
6.81546	0.361782	2.14846	0.168391	0.866275	0.999201	AMPD3	N.S.
123.568	-0.203898	0.512524	-0.39783	0.690755	0.998563	AMPH	N.S.
299.064	-0.528389	0.440208	-1.20032	0.230016	0.998563	AMT	N.S.
0	NA	NA	NA	NA	NA	AMTN	N.S.
0	NA	NA	NA	NA	NA	AMY1A	N.S.
0.24662	-1.39	4.9962	-0.278211	0.78085	0.998563	AMY1B	N.S.
0.263943	1.53742	4.99164	0.307999	0.758083	0.998563	AMY1C	N.S.
0	NA	NA	NA	NA	NA	AMY2A	N.S.
346.567	-0.471045	0.393074	-1.19836	0.230776	0.998563	AMY2B	N.S.
6.21281	2.84786	2.33349	1.22043	0.222301	0.998563	AMZ1	N.S.
6174	0.0255691	0.204105	0.125274	0.900306	0.999201	AMZ2	N.S.
4030.76	-0.284111	0.234703	-1.21051	0.226082	0.998563	ANAPC1	N.S.
504.485	0.225659	0.297241	0.759179	0.447746	0.998563	ANAPC10	N.S.
4552.52	0.457632	0.247689	1.84761	0.0646592	0.998563	ANAPC11	N.S.
1500.97	0.445548	0.27869	1.59872	0.109882	0.998563	ANAPC13	N.S.
949.991	-0.0845367	0.29387	-0.287667	0.773602	0.998563	ANAPC15	N.S.
3250.11	0.0556311	0.224251	0.248076	0.804076	0.998563	ANAPC16	N.S.
2987.8	0.0655256	0.233473	0.280656	0.778974	0.998563	ANAPC2	N.S.
1302.62	0.0972245	0.246076	0.3951	0.692769	0.998563	ANAPC4	N.S.
5737.07	0.0554466	0.219756	0.25231	0.800801	0.998563	ANAPC5	N.S.
3933.97	0.132382	0.218674	0.605385	0.544923	0.998563	ANAPC7	N.S.
2261.17	0.0408078	0.256135	0.159321	0.873416	0.999201	ANG	N.S.
2182.26	0.173877	0.223655	0.777433	0.436903	0.998563	ANGEL1	N.S.
1780.81	0.0757988	0.23255	0.325946	0.744465	0.998563	ANGEL2	N.S.
923.533	-0.113632	0.26084	-0.435639	0.663099	0.998563	ANGPT1	N.S.
10.4765	-1.47509	1.50614	-0.979381	0.327392	0.998563	ANGPT2	N.S.
0	NA	NA	NA	NA	NA	ANGPT4	N.S.
486.779	-0.974352	0.359186	-2.71267	0.00667437	0.657981	ANGPTL1	N.S.
2.5452	0.0996556	3.13984	0.0317391	0.97468	0.999201	ANGPTL2	N.S.
0.263943	1.53742	4.99164	0.307999	0.758083	0.998563	ANGPTL3	N.S.
176.359	0.410812	0.419678	0.978874	0.327642	0.998563	ANGPTL4	N.S.
0	NA	NA	NA	NA	NA	ANGPTL5	N.S.
37.558	0.0375182	0.817911	0.0458708	0.963413	0.999201	ANGPTL6	N.S.
3.76314	-0.518724	2.40995	-0.215243	0.829578	0.998563	ANGPTL7	N.S.
2.08072	2.15691	3.46999	0.62159	0.534212	0.998563	ANGPTL8	N.S.
0	NA	NA	NA	NA	NA	ANHX	N.S.
235.947	-1.03915	0.40594	-2.55987	0.0104711	0.796305	ANK1	N.S.
1338.58	-0.698393	0.283041	-2.46746	0.0136075	0.872748	ANK2	N.S.
1805.88	-0.135395	0.280668	-0.482404	0.629519	0.998563	ANK3	N.S.
131.791	-0.612147	0.489858	-1.24964	0.21143	0.998563	ANKAR	N.S.
322.795	0.117557	0.336396	0.34946	0.726744	0.998563	ANKDD1A	N.S.
3.43747	-1.05808	2.52269	-0.419424	0.674906	0.998563	ANKDD1B	N.S.
384.49	0.163667	0.349888	0.467772	0.639948	0.998563	ANKEF1	N.S.
0	NA	NA	NA	NA	NA	ANKFN1	N.S.
5545.45	-0.17568	0.231222	-0.759788	0.447381	0.998563	ANKFY1	N.S.
1977.02	0.0360235	0.22797	0.158019	0.874442	0.999201	ANKH	N.S.
3604.41	0.016778	0.281685	0.059563	0.952504	0.999201	ANKHD1	N.S.
1734.65	0.274469	0.239039	1.14822	0.250879	0.998563	ANKHD1-EIF4EBP3	N.S.
3635.25	-0.200285	0.234549	-0.853916	0.393152	0.998563	ANKIB1	N.S.
16.2319	1.16883	1.40239	0.833455	0.404588	0.998563	ANKK1	N.S.
30.5368	-2.05983	1.19104	-1.72944	0.0837312	0.998563	ANKLE1	N.S.
5537.45	0.156044	0.204169	0.76429	0.444695	0.998563	ANKLE2	N.S.
253.914	-0.358004	0.387903	-0.922921	0.356049	0.998563	ANKMY1	N.S.
1254.67	0.105259	0.286611	0.367254	0.71343	0.998563	ANKMY2	N.S.
570.178	0.308491	0.284124	1.08576	0.277585	0.998563	ANKRA2	N.S.
23615.9	-1.00218	0.265621	-3.77298	0.00016131	0.064347	ANKRD1	N.S.
1261.62	-0.0430784	0.255342	-0.168709	0.866026	0.999201	ANKRD10	N.S.
8091.1	-0.0674304	0.237488	-0.283932	0.776462	0.998563	ANKRD11	N.S.
1591.28	0.257599	0.375056	0.686829	0.492191	0.998563	ANKRD12	N.S.
1524.57	-0.0903407	0.29565	-0.305567	0.759934	0.998563	ANKRD13A	N.S.
7527.95	-0.362635	0.201978	-1.79542	0.0725869	0.998563	ANKRD13B	N.S.
1649.92	0.0234919	0.239383	0.0981349	0.921825	0.999201	ANKRD13C	N.S.
2035.63	0.0133758	0.241663	0.0553489	0.95586	0.999201	ANKRD13D	N.S.
627.402	-0.0475928	0.322072	-0.147771	0.882524	0.999201	ANKRD16	N.S.
4925.8	-0.169678	0.258887	-0.655413	0.512202	0.998563	ANKRD17	N.S.
265.274	0.416318	0.423042	0.984107	0.325063	0.998563	ANKRD18A	N.S.
160.189	-0.348275	0.456657	-0.762661	0.445666	0.998563	ANKRD18B	N.S.
0.49324	-2.39199	4.89158	-0.489002	0.62484	0.998563	ANKRD2	N.S.
20.7158	0.0661158	1.13193	0.0584097	0.953422	0.999201	ANKRD20A1	N.S.
26.827	-0.544546	0.954696	-0.570387	0.568415	0.998563	ANKRD20A2	N.S.
9.28855	0.867016	1.6447	0.527156	0.598085	0.998563	ANKRD20A3	N.S.
30.2563	-1.04981	0.986178	-1.06452	0.287093	0.998563	ANKRD20A4	N.S.
0	NA	NA	NA	NA	NA	ANKRD22	N.S.
171.352	-0.0967807	0.448173	-0.215945	0.829031	0.998563	ANKRD23	N.S.
2315.83	-0.138804	0.233727	-0.593871	0.552598	0.998563	ANKRD24	N.S.
872.396	0.364605	0.275644	1.32274	0.185922	0.998563	ANKRD26	N.S.
2672.01	-0.110505	0.217387	-0.508336	0.611218	0.998563	ANKRD27	N.S.
2567.77	-0.605731	0.273582	-2.21407	0.0268239	0.998563	ANKRD28	N.S.
251.962	-0.0317868	0.373871	-0.0850207	0.932245	0.999201	ANKRD29	N.S.
0	NA	NA	NA	NA	NA	ANKRD30A	N.S.
0	NA	NA	NA	NA	NA	ANKRD30B	N.S.
0	NA	NA	NA	NA	NA	ANKRD30BL	N.S.
63.7739	-0.638191	0.652935	-0.977418	0.328362	0.998563	ANKRD31	N.S.
0	NA	NA	NA	NA	NA	ANKRD33	N.S.
414.024	-0.277743	0.333988	-0.831593	0.405639	0.998563	ANKRD33B	N.S.
371.348	-0.0191162	0.347685	-0.0549812	0.956153	0.999201	ANKRD34A	N.S.
508.89	-0.315321	0.320692	-0.983251	0.325484	0.998563	ANKRD34B	N.S.
0	NA	NA	NA	NA	NA	ANKRD34C	N.S.
7.68082	0.296067	2.02291	0.146357	0.883639	0.999201	ANKRD35	N.S.
216.427	0.322795	0.384205	0.840163	0.400817	0.998563	ANKRD36	N.S.
218.09	-1.34878	0.407579	-3.30923	0.000935513	0.246779	ANKRD36B	N.S.
127.829	-0.169109	0.494861	-0.34173	0.732554	0.998563	ANKRD36C	N.S.
142.195	0.114233	0.470197	0.242947	0.808047	0.998563	ANKRD37	N.S.
944.291	0.0192324	0.265228	0.0725128	0.942194	0.999201	ANKRD39	N.S.
3766.48	-0.115538	0.205383	-0.56255	0.573741	0.998563	ANKRD40	N.S.
864.591	-0.140819	0.27804	-0.506472	0.612526	0.998563	ANKRD42	N.S.
372.828	-0.177408	0.375677	-0.472235	0.636759	0.998563	ANKRD44	N.S.
1.21648	-1.93515	4.82791	-0.400824	0.688549	0.998563	ANKRD45	N.S.
1093.53	0.259226	0.248753	1.0421	0.297363	0.998563	ANKRD46	N.S.
679.492	0.0292337	0.26911	0.108631	0.913495	0.999201	ANKRD49	N.S.
3210.55	-0.385516	0.269263	-1.43175	0.152217	0.998563	ANKRD50	N.S.
7680.36	-0.341888	0.21878	-1.5627	0.118123	0.998563	ANKRD52	N.S.
2.05968	4.51408	3.78692	1.19202	0.233254	0.998563	ANKRD53	N.S.
2016.1	0.440704	0.223881	1.96847	0.0490138	0.998563	ANKRD54	N.S.
0	NA	NA	NA	NA	NA	ANKRD55	N.S.
1509.36	-0.0815226	0.261548	-0.311692	0.755274	0.998563	ANKRD6	N.S.
0	NA	NA	NA	NA	NA	ANKRD60	N.S.
3.26293	1.20204	2.81472	0.427056	0.669339	0.998563	ANKRD61	N.S.
0	NA	NA	NA	NA	NA	ANKRD62	N.S.
0.486161	-2.37303	4.89298	-0.484987	0.627685	0.998563	ANKRD63	N.S.
4.30125	-0.361364	2.29053	-0.157764	0.874643	0.999201	ANKRD65	N.S.
0	NA	NA	NA	NA	NA	ANKRD66	N.S.
13.8582	0.436857	1.31661	0.331805	0.740036	0.998563	ANKRD7	N.S.
2944.24	0.148091	0.263329	0.562382	0.573856	0.998563	ANKRD9	N.S.
2734.35	-0.145465	0.270809	-0.537147	0.591166	0.998563	ANKS1A	N.S.
310.682	-0.126213	0.348851	-0.361796	0.717504	0.998563	ANKS1B	N.S.
894.96	0.583722	0.255939	2.28071	0.0225659	0.989438	ANKS3	N.S.
0	NA	NA	NA	NA	NA	ANKS4B	N.S.
3299.91	-0.0675493	0.231199	-0.292169	0.770157	0.998563	ANKS6	N.S.
0	NA	NA	NA	NA	NA	ANKUB1	N.S.
1255.81	0.00734627	0.233877	0.0314108	0.974942	0.999201	ANKZF1	N.S.
2072.58	-0.285985	0.259176	-1.10344	0.269836	0.998563	ANLN	N.S.
1.25123	-1.91827	4.77361	-0.401849	0.687795	0.998563	ANO1	N.S.
2265.26	0.0433668	0.223843	0.193737	0.846382	0.998563	ANO10	N.S.
0.493744	2.45901	4.89559	0.50229	0.615464	0.998563	ANO2	N.S.
0.897058	-3.26096	4.84471	-0.673098	0.500885	0.998563	ANO3	N.S.
0	NA	NA	NA	NA	NA	ANO4	N.S.
26.632	0.61205	1.05081	0.582457	0.560259	0.998563	ANO5	N.S.
4495.96	-0.360119	0.241515	-1.49109	0.135939	0.998563	ANO6	N.S.
210.567	-0.141721	0.393635	-0.360031	0.718824	0.998563	ANO7	N.S.
3436.4	-0.276408	0.210801	-1.31123	0.189781	0.998563	ANO8	N.S.
10.8801	-1.20004	1.50336	-0.798239	0.424732	0.998563	ANO9	N.S.
5130.57	-0.114655	0.802445	-0.142883	0.886383	0.999201	ANOS1	N.S.
8464.79	-0.0782334	0.211762	-0.36944	0.7118	0.998563	ANP32A	N.S.
5624.21	0.0796058	0.204212	0.38982	0.69667	0.998563	ANP32B	N.S.
1.23398	0.591904	4.72958	0.125149	0.900405	0.999201	ANP32D	N.S.
3972.86	-0.0888207	0.205875	-0.43143	0.666156	0.998563	ANP32E	N.S.
2.86756	-2.50596	3.36256	-0.745254	0.456118	0.998563	ANPEP	N.S.
1711.84	-0.003562	0.22705	-0.0156881	0.987483	0.999201	ANTXR1	N.S.
11327.6	-0.188829	0.271019	-0.696737	0.485967	0.998563	ANTXR2	N.S.
1.47972	-3.97751	4.82061	-0.825106	0.409311	0.998563	ANTXRL	N.S.
20483.1	-0.653387	0.719706	-0.907853	0.363956	0.998563	ANXA1	N.S.
0	NA	NA	NA	NA	NA	ANXA10	N.S.
9516.22	0.0682742	0.204926	0.333166	0.739009	0.998563	ANXA11	N.S.
0.739861	-2.97723	4.85622	-0.613076	0.539826	0.998563	ANXA13	N.S.
43852.9	-0.333905	0.245371	-1.36082	0.173571	0.998563	ANXA2	N.S.
337.432	0.643695	0.356867	1.80374	0.071272	0.998563	ANXA2R	N.S.
2.12116	3.56249	3.48513	1.0222	0.306687	0.998563	ANXA3	N.S.
8764.21	-0.209487	0.209053	-1.00208	0.316307	0.998563	ANXA4	N.S.
12965.4	-0.101358	0.200858	-0.504627	0.613821	0.998563	ANXA5	N.S.
13852.1	-0.0555532	0.204488	-0.27167	0.785876	0.998563	ANXA6	N.S.
4697.24	-0.0862851	0.20584	-0.419184	0.675081	0.998563	ANXA7	N.S.
0.762335	1.02865	4.88903	0.2104	0.833355	0.998563	ANXA8	N.S.
30.0989	-0.560836	0.90057	-0.622756	0.533445	0.998563	ANXA8L1	N.S.
39.9535	0.89523	0.792459	1.12969	0.258608	0.998563	ANXA9	N.S.
0	NA	NA	NA	NA	NA	AOAH	N.S.
0	NA	NA	NA	NA	NA	AOC1	N.S.
659.306	0.428134	0.446574	0.958709	0.337706	0.998563	AOC2	N.S.
186.538	0.195929	0.677707	0.289105	0.772501	0.998563	AOC3	N.S.
2.28456	0.388945	3.29305	0.118111	0.90598	0.999201	AOX1	N.S.
32.7651	1.03213	1.05309	0.980096	0.327039	0.998563	AP000275.65	N.S.
2.11154	4.54942	4.20604	1.08164	0.279412	0.998563	AP000295.9	N.S.
0	NA	NA	NA	NA	NA	AP000304.12	N.S.
0	NA	NA	NA	NA	NA	AP000322.53	N.S.
0	NA	NA	NA	NA	NA	AP000349.1	N.S.
0	NA	NA	NA	NA	NA	AP000349.2	N.S.
7.70976	-1.41532	2.34593	-0.603312	0.546301	0.998563	AP000350.10	N.S.
0	NA	NA	NA	NA	NA	AP000351.1	N.S.
0	NA	NA	NA	NA	NA	AP000687.1	N.S.
0	NA	NA	NA	NA	NA	AP000721.4	N.S.
96.066	2.66275	2.72987	0.975411	0.329357	0.998563	AP000769.1	N.S.
3.00232	1.05982	2.66203	0.398123	0.69054	0.998563	AP000866.1	N.S.
0	NA	NA	NA	NA	NA	AP001888.1	N.S.
0.243081	-1.37948	4.99696	-0.276065	0.782498	0.998563	AP002884.2	N.S.
0	NA	NA	NA	NA	NA	AP002962.1	N.S.
341.365	-0.192549	0.420395	-0.458019	0.646939	0.998563	AP003419.11	N.S.
0	NA	NA	NA	NA	NA	AP005242.1	N.S.
18.083	-2.01436	1.19782	-1.68168	0.0926302	0.998563	AP006285.1	N.S.
18.083	-2.01436	1.19782	-1.68168	0.0926302	0.998563	AP006285.2	N.S.
1943.17	-0.0820504	0.239216	-0.342998	0.7316	0.998563	AP1AR	N.S.
7247.53	0.197755	0.20538	0.962874	0.335611	0.998563	AP1B1	N.S.
6252.85	-0.267986	0.248608	-1.07795	0.281057	0.998563	AP1G1	N.S.
1031.79	0.21309	0.299907	0.71052	0.477381	0.998563	AP1G2	N.S.
7901.67	0.055538	0.208215	0.266734	0.789674	0.998563	AP1M1	N.S.
499.166	-0.0780978	0.318764	-0.245002	0.806455	0.998563	AP1M2	N.S.
7711	0.196272	0.204736	0.958656	0.337732	0.998563	AP1S1	N.S.
3556.67	-0.0407981	0.312541	-0.130536	0.896142	0.999201	AP1S2	N.S.
816.666	-0.309458	0.255424	-1.21155	0.225685	0.998563	AP1S3	N.S.
6777.91	0.0361895	0.210222	0.172149	0.86332	0.999132	AP2A1	N.S.
9574.34	0.0259172	0.212723	0.121835	0.90303	0.999201	AP2A2	N.S.
26740.1	-0.336223	0.196242	-1.71331	0.0866558	0.998563	AP2B1	N.S.
22967.3	0.174696	0.194365	0.898805	0.368757	0.998563	AP2M1	N.S.
5310.39	0.407516	0.248109	1.64248	0.10049	0.998563	AP2S1	N.S.
5306.76	-0.0462858	0.212736	-0.217574	0.827761	0.998563	AP3B1	N.S.
451.251	-0.290446	0.302564	-0.959947	0.337082	0.998563	AP3B2	N.S.
23028.8	0.0305855	0.191801	0.159465	0.873303	0.999201	AP3D1	N.S.
3861.22	-0.343129	0.214768	-1.59768	0.110115	0.998563	AP3M1	N.S.
1306.06	0.197598	0.242453	0.814993	0.415076	0.998563	AP3M2	N.S.
2636.99	0.0415023	0.213888	0.194038	0.846146	0.998563	AP3S1	N.S.
2148.17	-0.0872576	0.249377	-0.349903	0.726412	0.998563	AP3S2	N.S.
1113.34	-0.00696828	0.249067	-0.0279775	0.97768	0.999201	AP4B1	N.S.
866.429	-0.167226	0.307593	-0.543658	0.586677	0.998563	AP4E1	N.S.
1451.27	-0.185447	0.295371	-0.627844	0.530106	0.998563	AP4M1	N.S.
737.274	0.114466	0.261492	0.437743	0.661573	0.998563	AP4S1	N.S.
3683.86	-0.45027	0.20847	-2.15988	0.030782	0.998563	AP5B1	N.S.
1604.64	-0.130457	0.236632	-0.551307	0.581423	0.998563	AP5M1	N.S.
1193.74	0.313248	0.253208	1.23712	0.216042	0.998563	AP5S1	N.S.
4596.63	0.119741	0.202385	0.591651	0.554084	0.998563	AP5Z1	N.S.
3591.65	-0.161002	0.21687	-0.742389	0.457852	0.998563	APAF1	N.S.
1116.77	-0.151279	0.275829	-0.54845	0.583383	0.998563	APBA1	N.S.
3461.42	-0.126438	0.210619	-0.600313	0.548297	0.998563	APBA2	N.S.
1479.29	-0.0113951	0.247913	-0.0459642	0.963339	0.999201	APBA3	N.S.
4636.48	0.144788	0.221248	0.654417	0.512843	0.998563	APBB1	N.S.
0.49324	-2.39199	4.89158	-0.489002	0.62484	0.998563	APBB1IP	N.S.
8195.94	-0.344511	0.228251	-1.50935	0.13121	0.998563	APBB2	N.S.
669.913	-0.274895	0.308618	-0.89073	0.373074	0.998563	APBB3	N.S.
5033.86	-0.56516	0.309219	-1.8277	0.067594	0.998563	APC	N.S.
5609.87	-0.683873	0.229621	-2.97826	0.00289885	0.474107	APC2	N.S.
4.21871	-0.134698	2.27861	-0.0591143	0.952861	0.999201	APCDD1	N.S.
0.493744	2.45901	4.89559	0.50229	0.615464	0.998563	APCDD1L	N.S.
0.24662	-1.39	4.9962	-0.278211	0.78085	0.998563	APCS	N.S.
3557.74	-0.494977	0.302826	-1.63453	0.102148	0.998563	APEH	N.S.
241.352	-0.427698	0.441355	-0.969057	0.332517	0.998563	APELA	N.S.
10894.5	0.236871	0.204738	1.15695	0.247293	0.998563	APEX1	N.S.
1329.63	-0.131255	0.243181	-0.539742	0.589375	0.998563	APEX2	N.S.
11605.7	0.0389277	0.20568	0.189263	0.849886	0.998563	APH1A	N.S.
815.675	-0.23813	0.259122	-0.918987	0.358102	0.998563	APH1B	N.S.
7540.55	-0.171053	0.216951	-0.78844	0.43044	0.998563	API5	N.S.
670.849	0.0972752	0.286562	0.339456	0.734266	0.998563	APIP	N.S.
617.926	0.459319	0.27361	1.67873	0.0932039	0.998563	APITD1	N.S.
33.3362	1.51613	1.00695	1.50567	0.132152	0.998563	APITD1-CORT	N.S.
432.406	-0.0115898	0.301592	-0.0384288	0.969346	0.999201	APLF	N.S.
30.4451	-0.639849	0.944327	-0.677571	0.498044	0.998563	APLN	N.S.
0	NA	NA	NA	NA	NA	APLNR	N.S.
15633.4	0.358902	0.223779	1.60383	0.108752	0.998563	APLP1	N.S.
36213.1	0.0306841	0.199426	0.153862	0.877718	0.999201	APLP2	N.S.
7698.93	0.0581382	0.201473	0.288566	0.772913	0.998563	APMAP	N.S.
5.5082	0.0506609	2.00454	0.025273	0.979837	0.999201	APOA1	N.S.
9322.26	0.3213	0.241526	1.33029	0.183422	0.998563	APOA1BP	N.S.
0.490045	-2.38337	4.89228	-0.48717	0.626138	0.998563	APOA2	N.S.
0	NA	NA	NA	NA	NA	APOA4	N.S.
0.729242	-2.95768	4.85718	-0.608929	0.542572	0.998563	APOA5	N.S.
0	NA	NA	NA	NA	NA	APOB	N.S.
0	NA	NA	NA	NA	NA	APOBEC1	N.S.
1.71472	-1.29228	3.70864	-0.348451	0.727502	0.998563	APOBEC2	N.S.
0	NA	NA	NA	NA	NA	APOBEC3A	N.S.
2.21958	-4.56251	4.1239	-1.10636	0.268571	0.998563	APOBEC3B	N.S.
14.5486	-0.484392	1.53101	-0.316388	0.751708	0.998563	APOBEC3C	N.S.
0	NA	NA	NA	NA	NA	APOBEC3D	N.S.
616.412	0.0984063	0.273163	0.360247	0.718662	0.998563	APOBEC3F	N.S.
0.243081	-1.37948	4.99696	-0.276065	0.782498	0.998563	APOBEC3G	N.S.
2.47694	-1.24276	3.53867	-0.351194	0.725443	0.998563	APOBEC3H	N.S.
0	NA	NA	NA	NA	NA	APOBEC4	N.S.
27.1486	0.402426	0.972037	0.414003	0.678872	0.998563	APOBR	N.S.
579.46	-0.188599	0.386941	-0.487409	0.625968	0.998563	APOC1	N.S.
0	NA	NA	NA	NA	NA	APOC2	N.S.
0	NA	NA	NA	NA	NA	APOC3	N.S.
0	NA	NA	NA	NA	NA	APOC4	N.S.
2.90337	5.00892	3.72326	1.3453	0.178527	0.998563	APOC4-APOC2	N.S.
0.243081	-1.37948	4.99696	-0.276065	0.782498	0.998563	APOD	N.S.
56999.4	0.228557	0.304011	0.751806	0.452168	0.998563	APOE	N.S.
0.493744	2.45901	4.89559	0.50229	0.615464	0.998563	APOF	N.S.
0	NA	NA	NA	NA	NA	APOH	N.S.
3.77803	-0.892731	2.68235	-0.332816	0.739273	0.998563	APOL1	N.S.
2666.49	-0.254189	0.219681	-1.15708	0.247239	0.998563	APOL2	N.S.
0	NA	NA	NA	NA	NA	APOL3	N.S.
0	NA	NA	NA	NA	NA	APOL4	N.S.
0	NA	NA	NA	NA	NA	APOL5	N.S.
4.05988	0.0876803	2.38759	0.0367233	0.970706	0.999201	APOL6	N.S.
116.319	0.414445	0.497549	0.832973	0.40486	0.998563	APOLD1	N.S.
24.5023	-0.114612	0.990503	-0.115711	0.907882	0.999201	APOM	N.S.
1158.15	0.54285	0.246032	2.20642	0.0273544	0.998563	APOO	N.S.
1712.33	-0.129797	0.267823	-0.484636	0.627934	0.998563	APOOL	N.S.
1715.93	0.308664	0.229669	1.34395	0.178964	0.998563	APOPT1	N.S.
48590.6	-0.208789	0.202281	-1.03217	0.30199	0.998563	APP	N.S.
4251.38	-0.303315	0.267011	-1.13596	0.255972	0.998563	APPBP2	N.S.
3836.68	-0.134372	0.233776	-0.574789	0.565434	0.998563	APPL1	N.S.
1229.38	0.218655	0.234705	0.931617	0.351535	0.998563	APPL2	N.S.
4146.85	-0.117627	0.295026	-0.3987	0.690114	0.998563	APRT	N.S.
1746.08	0.311017	0.227021	1.36999	0.17069	0.998563	APTX	N.S.
8.06468	-1.06271	1.80075	-0.590149	0.555091	0.998563	AQP1	N.S.
0.24662	-1.39	4.9962	-0.278211	0.78085	0.998563	AQP10	N.S.
294.706	-0.0358221	0.350518	-0.102198	0.9186	0.999201	AQP11	N.S.
0	NA	NA	NA	NA	NA	AQP12A	N.S.
0	NA	NA	NA	NA	NA	AQP12B	N.S.
0	NA	NA	NA	NA	NA	AQP2	N.S.
0.767139	1.07545	4.88972	0.219941	0.825917	0.998563	AQP3	N.S.
0	NA	NA	NA	NA	NA	AQP4	N.S.
0	NA	NA	NA	NA	NA	AQP5	N.S.
18.2374	0.211273	1.19631	0.176604	0.85982	0.998563	AQP6	N.S.
0.493744	2.45901	4.89559	0.50229	0.615464	0.998563	AQP7	N.S.
1.23436	3.77832	4.82947	0.782346	0.434011	0.998563	AQP8	N.S.
0.791828	3.13299	4.85452	0.645375	0.518684	0.998563	AQP9	N.S.
3434.83	-0.0257369	0.211972	-0.121417	0.903361	0.999201	AQR	N.S.
570.92	-0.641234	0.307992	-2.08198	0.037344	0.998563	AR	N.S.
5278.73	0.143485	0.206043	0.696383	0.486189	0.998563	ARAF	N.S.
7173.36	-0.124369	0.203056	-0.612486	0.540216	0.998563	ARAP1	N.S.
790.042	-0.336732	0.292514	-1.15116	0.249665	0.998563	ARAP2	N.S.
1.31971	3.87106	4.82669	0.802012	0.422546	0.998563	ARAP3	N.S.
45.1024	0.0707401	0.760364	0.0930345	0.925876	0.999201	ARC	N.S.
10938.6	0.0577241	0.208506	0.276846	0.781898	0.998563	ARCN1	N.S.
9.47798	0.372051	1.69016	0.220127	0.825772	0.998563	AREG	N.S.
4262.59	-0.14169	0.248081	-0.571144	0.567902	0.998563	AREL1	N.S.
35227.1	0.136236	0.201836	0.674981	0.499688	0.998563	ARF1	N.S.
16853.8	-0.200268	0.209842	-0.954375	0.339894	0.998563	ARF3	N.S.
13454.1	-0.147757	0.195538	-0.755645	0.449862	0.998563	ARF4	N.S.
11520.1	-0.0742834	0.244405	-0.303936	0.761177	0.998563	ARF5	N.S.
4508.4	0.0934757	0.207948	0.449516	0.65306	0.998563	ARF6	N.S.
11693.9	0.119493	0.199134	0.600065	0.548463	0.998563	ARFGAP1	N.S.
4094.7	0.0526994	0.2045	0.257698	0.79664	0.998563	ARFGAP2	N.S.
3583.97	0.00935501	0.208446	0.0448797	0.964203	0.999201	ARFGAP3	N.S.
4861.72	-0.0606241	0.209981	-0.288712	0.772802	0.998563	ARFGEF1	N.S.
1954.03	-0.287316	0.277254	-1.03629	0.300066	0.998563	ARFGEF2	N.S.
1263.58	-0.875022	0.296355	-2.95261	0.00315097	0.500332	ARFGEF3	N.S.
1971.99	-0.0210997	0.225374	-0.0936207	0.92541	0.999201	ARFIP1	N.S.
5861.4	0.405455	0.211957	1.91291	0.0557597	0.998563	ARFIP2	N.S.
2518.5	0.0571153	0.228251	0.25023	0.802409	0.998563	ARFRP1	N.S.
1.50076	-3.98043	4.3523	-0.914558	0.360424	0.998563	ARG1	N.S.
123.846	0.377946	0.477672	0.791226	0.428812	0.998563	ARG2	N.S.
0	NA	NA	NA	NA	NA	ARGFX	N.S.
1536.99	-0.375747	0.279157	-1.34601	0.1783	0.998563	ARGLU1	N.S.
5788.65	-0.0788186	0.201143	-0.391853	0.695167	0.998563	ARHGAP1	N.S.
888.759	-0.173154	0.250268	-0.691871	0.489018	0.998563	ARHGAP10	N.S.
1008.93	-0.309252	0.289001	-1.07007	0.284587	0.998563	ARHGAP11A	N.S.
132.834	0.402911	0.638971	0.630563	0.528327	0.998563	ARHGAP11B	N.S.
1482.61	0.112139	0.250979	0.446807	0.655014	0.998563	ARHGAP12	N.S.
4.38411	0.632903	2.34796	0.269554	0.787503	0.998563	ARHGAP15	N.S.
4085.56	-0.00425808	0.213098	-0.0199818	0.984058	0.999201	ARHGAP17	N.S.
817.224	-0.629839	1.00237	-0.628352	0.529773	0.998563	ARHGAP18	N.S.
1459.8	-0.0668428	0.239302	-0.279324	0.779996	0.998563	ARHGAP19	N.S.
2.23758	-2.92642	3.4876	-0.839092	0.401418	0.998563	ARHGAP19-SLIT1	N.S.
13.2288	-1.17991	1.54709	-0.762662	0.445665	0.998563	ARHGAP20	N.S.
2533.19	-0.476732	0.282325	-1.68859	0.0912978	0.998563	ARHGAP21	N.S.
357.051	0.12849	0.326068	0.39406	0.693536	0.998563	ARHGAP22	N.S.
4344.03	-0.17061	0.214617	-0.794949	0.426643	0.998563	ARHGAP23	N.S.
13.3444	-2.90622	1.70252	-1.70701	0.0878195	0.998563	ARHGAP24	N.S.
0	NA	NA	NA	NA	NA	ARHGAP25	N.S.
469.375	0.0145509	0.331499	0.0438944	0.964989	0.999201	ARHGAP26	N.S.
2026.72	-0.309376	0.221484	-1.39683	0.162465	0.998563	ARHGAP27	N.S.
8.02461	-1.5824	1.88474	-0.839585	0.401141	0.998563	ARHGAP28	N.S.
15.7678	-0.623397	1.25285	-0.497584	0.618777	0.998563	ARHGAP29	N.S.
61.228	-0.15444	0.651613	-0.237013	0.812647	0.998563	ARHGAP30	N.S.
154.575	-0.547501	0.484596	-1.12981	0.258557	0.998563	ARHGAP31	N.S.
2212.72	-0.931333	0.309891	-3.00535	0.00265274	0.451932	ARHGAP32	N.S.
1144.8	0.0352748	0.26819	0.131529	0.895356	0.999201	ARHGAP33	N.S.
6473.14	-0.136266	0.25429	-0.535866	0.592051	0.998563	ARHGAP35	N.S.
1.7162	-4.19169	4.08356	-1.02648	0.304666	0.998563	ARHGAP36	N.S.
2749.47	0.00862866	0.21476	0.0401782	0.967951	0.999201	ARHGAP39	N.S.
821.891	0.0816227	0.386715	0.211067	0.832835	0.998563	ARHGAP4	N.S.
0.726986	-2.93278	4.87264	-0.601888	0.547249	0.998563	ARHGAP40	N.S.
685.775	-0.598336	0.317343	-1.88545	0.0593686	0.998563	ARHGAP42	N.S.
1483.13	-0.0903734	0.23132	-0.390686	0.69603	0.998563	ARHGAP44	N.S.
3153.51	-0.394128	0.25905	-1.52144	0.12815	0.998563	ARHGAP5	N.S.
9.19546	0.641104	1.76924	0.362361	0.717082	0.998563	ARHGAP6	N.S.
1064.43	0.0586609	0.254584	0.230418	0.817767	0.998563	ARHGAP8	N.S.
1.31971	3.87106	4.82669	0.802012	0.422546	0.998563	ARHGAP9	N.S.
24910.7	0.0123053	0.208398	0.0590472	0.952915	0.999201	ARHGDIA	N.S.
0	NA	NA	NA	NA	NA	ARHGDIB	N.S.
301.694	-0.322819	0.363433	-0.888247	0.374408	0.998563	ARHGDIG	N.S.
3461.31	0.299265	0.215172	1.39082	0.164281	0.998563	ARHGEF1	N.S.
3494.22	-0.259343	0.216397	-1.19846	0.230739	0.998563	ARHGEF10	N.S.
839.739	-0.217413	0.274486	-0.792072	0.428319	0.998563	ARHGEF10L	N.S.
6390.06	-0.105969	0.224413	-0.472205	0.63678	0.998563	ARHGEF11	N.S.
6822.8	-0.281543	0.272355	-1.03374	0.301259	0.998563	ARHGEF12	N.S.
1.25718	-0.47195	4.69376	-0.100548	0.919909	0.999201	ARHGEF15	N.S.
2026.66	0.1804	0.219766	0.820872	0.411719	0.998563	ARHGEF16	N.S.
3450.32	0.0762058	0.238736	0.319206	0.74957	0.998563	ARHGEF17	N.S.
4424.27	0.0446359	0.247594	0.180279	0.856934	0.998563	ARHGEF18	N.S.
101.573	-0.158779	0.561578	-0.282737	0.777378	0.998563	ARHGEF19	N.S.
3955.09	0.123362	0.208306	0.592214	0.553707	0.998563	ARHGEF2	N.S.
1445.62	-0.356781	0.282141	-1.26455	0.206032	0.998563	ARHGEF25	N.S.
3162.89	0.0525433	0.222177	0.236493	0.81305	0.998563	ARHGEF26	N.S.
32.7075	-1.37616	1.01438	-1.35665	0.174893	0.998563	ARHGEF28	N.S.
1113.11	-0.0338281	0.258191	-0.13102	0.89576	0.999201	ARHGEF3	N.S.
1.9664	-2.76342	3.6103	-0.765426	0.444018	0.998563	ARHGEF33	N.S.
0	NA	NA	NA	NA	NA	ARHGEF35	N.S.
7.40326	-0.342385	1.82537	-0.187571	0.851213	0.998563	ARHGEF37	N.S.
0.243081	-1.37948	4.99696	-0.276065	0.782498	0.998563	ARHGEF38	N.S.
292.765	-0.0710344	0.371244	-0.191341	0.848258	0.998563	ARHGEF39	N.S.
451.354	-0.0413854	0.316852	-0.130614	0.89608	0.999201	ARHGEF4	N.S.
2933.46	-0.0058804	0.210078	-0.0279915	0.977669	0.999201	ARHGEF40	N.S.
0.263943	1.53742	4.99164	0.307999	0.758083	0.998563	ARHGEF5	N.S.
432.698	-0.332038	0.309256	-1.07367	0.282972	0.998563	ARHGEF6	N.S.
3999.1	-0.101366	0.250579	-0.404528	0.685825	0.998563	ARHGEF7	N.S.
828.488	-0.492012	0.272704	-1.8042	0.0711998	0.998563	ARHGEF9	N.S.
8818.19	-0.201857	0.20499	-0.984712	0.324765	0.998563	ARID1A	N.S.
4322.54	-0.552298	0.247233	-2.23392	0.0254883	0.998563	ARID1B	N.S.
2268.58	-0.0778868	0.248238	-0.313758	0.753705	0.998563	ARID2	N.S.
1953.2	-0.692577	0.220373	-3.14275	0.00167368	0.347736	ARID3A	N.S.
1955.75	-0.125501	0.221591	-0.566365	0.571146	0.998563	ARID3B	N.S.
8.24463	1.25149	1.69732	0.737335	0.460918	0.998563	ARID3C	N.S.
1096.7	-0.0306306	0.300317	-0.101994	0.918761	0.999201	ARID4A	N.S.
2364.3	-0.211779	0.267505	-0.791682	0.428546	0.998563	ARID4B	N.S.
676.692	0.147107	0.271115	0.542601	0.587405	0.998563	ARID5A	N.S.
6066.85	-0.605564	0.239048	-2.53323	0.0113016	0.807149	ARID5B	N.S.
4934.27	-0.167645	0.247427	-0.677552	0.498056	0.998563	ARIH1	N.S.
6606.78	-0.0941647	0.204066	-0.461443	0.644481	0.998563	ARIH2	N.S.
211.566	0.383772	0.391545	0.980149	0.327013	0.998563	ARIH2OS	N.S.
3687.49	-0.0248353	0.22706	-0.109377	0.912903	0.999201	ARL1	N.S.
4505.81	-0.318626	0.235603	-1.35239	0.176251	0.998563	ARL10	N.S.
0.263943	1.53742	4.99164	0.307999	0.758083	0.998563	ARL11	N.S.
1.2154	-3.69437	4.82835	-0.765141	0.444187	0.998563	ARL13A	N.S.
1297.96	0.308636	0.253457	1.21771	0.223335	0.998563	ARL13B	N.S.
0.263943	1.53742	4.99164	0.307999	0.758083	0.998563	ARL14	N.S.
1024	0.154186	0.26677	0.577973	0.563282	0.998563	ARL14EP	N.S.
0	NA	NA	NA	NA	NA	ARL14EPL	N.S.
869.028	-0.180248	0.289113	-0.623452	0.532988	0.998563	ARL15	N.S.
2392.16	0.388312	0.219308	1.77062	0.0766233	0.998563	ARL16	N.S.
345.376	-0.402024	0.364732	-1.10225	0.270355	0.998563	ARL17A	N.S.
207.722	0.220772	0.432677	0.510246	0.609879	0.998563	ARL17B	N.S.
5303.15	0.234082	0.238297	0.982313	0.325946	0.998563	ARL2	N.S.
1.45848	-3.95733	4.82111	-0.820834	0.411741	0.998563	ARL2-SNX15	N.S.
4847.67	-0.0765505	0.207573	-0.368789	0.712285	0.998563	ARL2BP	N.S.
991.437	0.363467	0.261203	1.39151	0.16407	0.998563	ARL3	N.S.
7773.97	-0.0307343	0.19715	-0.155893	0.876117	0.999201	ARL4A	N.S.
117.404	0.194258	0.503394	0.385897	0.699573	0.998563	ARL4C	N.S.
848.651	0.342227	0.258184	1.32552	0.184999	0.998563	ARL4D	N.S.
3211.06	0.0221462	0.22714	0.0975002	0.922329	0.999201	ARL5A	N.S.
2637.33	-0.449711	0.22484	-2.00013	0.0454858	0.998563	ARL5B	N.S.
0.493164	-2.39167	4.89159	-0.488935	0.624888	0.998563	ARL5C	N.S.
492.462	0.338349	0.315932	1.07096	0.28419	0.998563	ARL6	N.S.
9145.8	-0.101044	0.232409	-0.43477	0.663729	0.998563	ARL6IP1	N.S.
2963.23	-0.215573	0.296152	-0.727915	0.466666	0.998563	ARL6IP4	N.S.
4763.41	0.0640661	0.20347	0.314867	0.752863	0.998563	ARL6IP5	N.S.
1612.45	-0.364651	0.236431	-1.54231	0.122998	0.998563	ARL6IP6	N.S.
5971.59	0.0652323	0.207046	0.315061	0.752715	0.998563	ARL8A	N.S.
6761.05	0.0117808	0.216066	0.054524	0.956518	0.999201	ARL8B	N.S.
1.28393	3.83283	4.62419	0.828866	0.40718	0.998563	ARL9	N.S.
3000.91	-0.286309	0.247185	-1.15828	0.246749	0.998563	ARMC1	N.S.
2396.22	0.0681468	0.21947	0.310506	0.756176	0.998563	ARMC10	N.S.
58.406	0.166553	0.739341	0.225273	0.821767	0.998563	ARMC12	N.S.
106.432	-0.139743	0.510993	-0.273474	0.784489	0.998563	ARMC2	N.S.
3.92605	-1.14044	2.59236	-0.439924	0.659992	0.998563	ARMC3	N.S.
0	NA	NA	NA	NA	NA	ARMC4	N.S.
3177.9	1.38795	0.222054	6.2505	4.09152e-10	2.23056e-06	ARMC5	padj<0.05 & Upregulated
3807.57	0.15339	0.218571	0.701787	0.482812	0.998563	ARMC6	N.S.
1647.84	0.563991	0.259874	2.17024	0.0299883	0.998563	ARMC7	N.S.
1728.67	0.0758215	0.228568	0.331725	0.740097	0.998563	ARMC8	N.S.
1063.56	-0.0258339	0.265986	-0.0971252	0.922627	0.999201	ARMC9	N.S.
12.4258	-0.512091	1.47203	-0.34788	0.72793	0.998563	ARMCX1	N.S.
0.263943	1.53742	4.99164	0.307999	0.758083	0.998563	ARMCX2	N.S.
6563.25	-0.183043	0.215347	-0.84999	0.39533	0.998563	ARMCX3	N.S.
234.031	-0.446222	0.410021	-1.08829	0.276467	0.998563	ARMCX4	N.S.
973.851	0.169861	0.274672	0.618415	0.536302	0.998563	ARMCX5	N.S.
2998.17	0.223778	0.229965	0.973093	0.330507	0.998563	ARMCX6	N.S.
0.506983	0.0935275	4.99135	0.0187379	0.98505	0.999201	ARMS2	N.S.
1359.58	0.2553	0.239209	1.06727	0.285851	0.998563	ARMT1	N.S.
5896.08	-0.254755	0.209291	-1.21723	0.223517	0.998563	ARNT	N.S.
418.913	-0.529534	0.318981	-1.66008	0.096898	0.998563	ARNT2	N.S.
598.834	-0.0497807	0.313677	-0.158701	0.873905	0.999201	ARNTL	N.S.
1078.21	-0.347455	0.296382	-1.17232	0.241068	0.998563	ARNTL2	N.S.
8719.02	0.2991	0.203702	1.46832	0.142017	0.998563	ARPC1A	N.S.
7933.14	-0.234183	0.284508	-0.823115	0.410442	0.998563	ARPC1B	N.S.
12586.8	-0.00896321	0.215809	-0.0415331	0.966871	0.999201	ARPC2	N.S.
9724.25	0.141389	0.22539	0.627311	0.530456	0.998563	ARPC3	N.S.
4412.51	-0.0922856	0.265312	-0.347839	0.727961	0.998563	ARPC4	N.S.
308.221	-0.452811	0.358064	-1.26461	0.206011	0.998563	ARPC4-TTLL3	N.S.
17220.9	-0.023551	0.193228	-0.121882	0.902993	0.999201	ARPC5	N.S.
2661.37	0.20024	0.225101	0.889555	0.373705	0.998563	ARPC5L	N.S.
2929.56	-0.297487	0.244719	-1.21563	0.224127	0.998563	ARPIN	N.S.
7863.55	-0.255491	0.226923	-1.12589	0.260211	0.998563	ARPP19	N.S.
3.07154	0.505973	2.89783	0.174604	0.861391	0.999011	ARPP21	N.S.
0.263943	1.53742	4.99164	0.307999	0.758083	0.998563	ARR3	N.S.
1031.56	-0.777392	0.30519	-2.54724	0.0108579	0.799913	ARRB1	N.S.
1494.12	0.108322	0.25243	0.429116	0.667839	0.998563	ARRB2	N.S.
1612.25	-0.289613	0.262669	-1.10258	0.27021	0.998563	ARRDC1	N.S.
2054.31	0.0640101	0.228344	0.280323	0.77923	0.998563	ARRDC2	N.S.
967.756	-0.493026	0.278562	-1.7699	0.076744	0.998563	ARRDC3	N.S.
1090.98	-0.402483	0.241414	-1.66719	0.0954768	0.998563	ARRDC4	N.S.
0	NA	NA	NA	NA	NA	ARRDC5	N.S.
3171.75	-0.339992	0.313163	-1.08567	0.277624	0.998563	ARSA	N.S.
1553.83	-0.232118	0.258412	-0.898247	0.369054	0.998563	ARSB	N.S.
1907.99	-0.24811	0.238756	-1.03918	0.298722	0.998563	ARSD	N.S.
2.4662	-4.71452	3.95949	-1.19069	0.233776	0.998563	ARSE	N.S.
0	NA	NA	NA	NA	NA	ARSF	N.S.
470.713	0.193621	0.330993	0.584972	0.558567	0.998563	ARSG	N.S.
0	NA	NA	NA	NA	NA	ARSH	N.S.
0	NA	NA	NA	NA	NA	ARSI	N.S.
5.14581	-1.55124	2.14945	-0.721693	0.470483	0.998563	ARSJ	N.S.
1103.01	-0.0123217	0.242856	-0.0507367	0.959535	0.999201	ARSK	N.S.
0	NA	NA	NA	NA	NA	ART1	N.S.
0	NA	NA	NA	NA	NA	ART3	N.S.
0.263943	1.53742	4.99164	0.307999	0.758083	0.998563	ART4	N.S.
0.263943	1.53742	4.99164	0.307999	0.758083	0.998563	ART5	N.S.
17.3202	0.171626	1.3237	0.129656	0.896838	0.999201	ARTN	N.S.
995.689	0.43317	0.257481	1.68234	0.0925031	0.998563	ARV1	N.S.
2322.6	0.0209968	0.216527	0.096971	0.922749	0.999201	ARVCF	N.S.
47.2699	0.472002	0.739856	0.637965	0.523497	0.998563	ARX	N.S.
20.7627	-0.191568	1.13602	-0.168631	0.866087	0.999201	AS3MT	N.S.
5267.64	0.0426243	0.20537	0.207549	0.835581	0.998563	ASAH1	N.S.
66.1972	-1.01695	0.664698	-1.52994	0.126032	0.998563	ASAH2	N.S.
343.549	-0.3315	0.330589	-1.00276	0.315978	0.998563	ASAH2B	N.S.
4919.41	-0.391475	0.250428	-1.56323	0.117999	0.998563	ASAP1	N.S.
787.963	-0.802181	0.31465	-2.54944	0.0107896	0.799913	ASAP2	N.S.
1182.89	-0.256349	0.252982	-1.01331	0.310912	0.998563	ASAP3	N.S.
1705.22	-0.302164	0.230134	-1.31299	0.189186	0.998563	ASB1	N.S.
0	NA	NA	NA	NA	NA	ASB10	N.S.
0	NA	NA	NA	NA	NA	ASB11	N.S.
9.12399	-0.0405899	1.70208	-0.0238472	0.980974	0.999201	ASB12	N.S.
1984.77	-0.160029	0.223548	-0.715859	0.474079	0.998563	ASB13	N.S.
11.0475	0.612027	1.45341	0.421098	0.673683	0.998563	ASB14	N.S.
0	NA	NA	NA	NA	NA	ASB15	N.S.
141.742	-0.0349338	0.452305	-0.0772349	0.938437	0.999201	ASB16	N.S.
0	NA	NA	NA	NA	NA	ASB17	N.S.
0.979433	-3.38255	4.83881	-0.699046	0.484523	0.998563	ASB18	N.S.
22.7703	-0.215983	1.03674	-0.20833	0.834971	0.998563	ASB2	N.S.
871.624	0.308809	0.262283	1.17739	0.239041	0.998563	ASB3	N.S.
0	NA	NA	NA	NA	NA	ASB4	N.S.
1.02156	3.50336	4.8388	0.724014	0.469057	0.998563	ASB5	N.S.
2898.01	0.0863056	0.226025	0.38184	0.70258	0.998563	ASB6	N.S.
1059.61	-0.259613	0.252916	-1.02648	0.304666	0.998563	ASB7	N.S.
1599.05	0.228504	0.241409	0.946543	0.343872	0.998563	ASB8	N.S.
0	NA	NA	NA	NA	NA	ASB9	N.S.
2029.4	-0.399282	0.278371	-1.43435	0.151472	0.998563	ASCC1	N.S.
3752.16	0.357804	0.210494	1.69983	0.0891624	0.998563	ASCC2	N.S.
6013.6	-0.13495	0.20253	-0.666324	0.505204	0.998563	ASCC3	N.S.
3.20587	-2.4442	2.95878	-0.826085	0.408756	0.998563	ASCL1	N.S.
9.72931	0.4397	1.68972	0.26022	0.794694	0.998563	ASCL2	N.S.
0	NA	NA	NA	NA	NA	ASCL3	N.S.
0	NA	NA	NA	NA	NA	ASCL4	N.S.
12.4798	-0.0186291	1.38282	-0.0134718	0.989251	0.999201	ASCL5	N.S.
1138.29	-0.0319319	0.241485	-0.132231	0.894801	0.999201	ASF1A	N.S.
633.851	0.189902	0.327039	0.580672	0.561462	0.998563	ASF1B	N.S.
40.9333	-0.215002	0.804706	-0.267181	0.78933	0.998563	ASGR1	N.S.
0	NA	NA	NA	NA	NA	ASGR2	N.S.
3818.81	-0.302994	0.272679	-1.11117	0.266493	0.998563	ASH1L	N.S.
2859	0.170598	0.215361	0.79215	0.428273	0.998563	ASH2L	N.S.
1552.98	-0.418862	0.273728	-1.53021	0.125964	0.998563	ASIC1	N.S.
0	NA	NA	NA	NA	NA	ASIC2	N.S.
173.892	-0.138951	0.458426	-0.303104	0.761811	0.998563	ASIC3	N.S.
46.4787	1.18165	0.76116	1.55243	0.120559	0.998563	ASIC4	N.S.
0	NA	NA	NA	NA	NA	ASIC5	N.S.
3.48754	0.0387393	2.50671	0.0154542	0.98767	0.999201	ASIP	N.S.
1240.49	-0.418936	0.323526	-1.29491	0.195351	0.998563	ASL	N.S.
0.49324	-2.39199	4.89158	-0.489002	0.62484	0.998563	ASMT	N.S.
1025.9	0.0449422	0.292166	0.153824	0.877748	0.999201	ASMTL	N.S.
5663.74	0.255218	0.229065	1.11417	0.265206	0.998563	ASNA1	N.S.
2082.57	0.177548	0.218592	0.812233	0.416658	0.998563	ASNS	N.S.
4900.19	0.12307	0.204676	0.601293	0.547645	0.998563	ASNSD1	N.S.
0.99662	-1.48853	4.75569	-0.313	0.754281	0.998563	ASPA	N.S.
2.55792	2.08745	3.16145	0.660282	0.509073	0.998563	ASPDH	N.S.
0.49324	-2.39199	4.89158	-0.489002	0.62484	0.998563	ASPG	N.S.
3080.2	-0.113442	0.216443	-0.524121	0.600194	0.998563	ASPH	N.S.
1741.02	0.236718	0.23809	0.994238	0.320107	0.998563	ASPHD1	N.S.
369.692	0.458166	0.339293	1.35035	0.176902	0.998563	ASPHD2	N.S.
1413.92	-0.0483943	0.319819	-0.151318	0.879725	0.999201	ASPM	N.S.
1.2154	-3.69437	4.82835	-0.765141	0.444187	0.998563	ASPN	N.S.
46.3564	0.686935	0.891636	0.770421	0.44105	0.998563	ASPRV1	N.S.
3812.09	0.249334	0.223815	1.11402	0.26527	0.998563	ASPSCR1	N.S.
1434.33	0.454907	0.269986	1.68493	0.092003	0.998563	ASRGL1	N.S.
1.45736	2.16359	4.04882	0.534376	0.593081	0.998563	ASS1	N.S.
312.531	0.241944	0.336171	0.719705	0.471707	0.998563	ASTE1	N.S.
0.486161	-2.37303	4.89298	-0.484987	0.627685	0.998563	ASTL	N.S.
0	NA	NA	NA	NA	NA	ASTN1	N.S.
1822.36	0.0722481	0.223883	0.322705	0.746919	0.998563	ASTN2	N.S.
1999.86	0.0570787	0.23126	0.246816	0.805051	0.998563	ASUN	N.S.
8521.2	-0.080176	0.205172	-0.390775	0.695963	0.998563	ASXL1	N.S.
3364.73	-0.548068	0.269769	-2.03162	0.0421922	0.998563	ASXL2	N.S.
5.28833	0.0831194	2.02839	0.0409781	0.967313	0.999201	ASXL3	N.S.
0	NA	NA	NA	NA	NA	ASZ1	N.S.
2990.4	0.100604	0.224463	0.448198	0.65401	0.998563	ATAD1	N.S.
2537.46	0.0324482	0.235092	0.138024	0.890222	0.999201	ATAD2	N.S.
2040.01	-0.248853	0.24829	-1.00227	0.316214	0.998563	ATAD2B	N.S.
2212.88	-0.141998	0.245163	-0.579198	0.562456	0.998563	ATAD3A	N.S.
1860.71	-0.34117	0.281247	-1.21306	0.225107	0.998563	ATAD3B	N.S.
45.4128	1.41392	0.82516	1.71351	0.0866183	0.998563	ATAD3C	N.S.
450.212	0.158725	0.328901	0.482592	0.629386	0.998563	ATAD5	N.S.
794.171	-0.0484908	0.280402	-0.172933	0.862704	0.999132	ATAT1	N.S.
0.918443	0.877488	4.83906	0.181335	0.856105	0.998563	ATCAY	N.S.
1656.19	-0.303405	0.239816	-1.26516	0.205815	0.998563	ATE1	N.S.
849.399	-0.0740091	0.26556	-0.278691	0.780482	0.998563	ATF1	N.S.
4826.56	-0.0026935	0.239961	-0.0112247	0.991044	0.999201	ATF2	N.S.
44.7754	-1.70731	0.897719	-1.90183	0.0571934	0.998563	ATF3	N.S.
12474.8	0.471737	0.309976	1.52185	0.128047	0.998563	ATF4	N.S.
4598.16	0.0625437	0.21841	0.286359	0.774603	0.998563	ATF5	N.S.
3576.96	-0.0570503	0.216801	-0.263146	0.792438	0.998563	ATF6	N.S.
3207.42	-0.513244	0.254296	-2.01829	0.0435606	0.998563	ATF6B	N.S.
3002.09	-0.17367	0.249004	-0.697457	0.485517	0.998563	ATF7	N.S.
2510.2	-0.505689	0.243425	-2.07739	0.0377653	0.998563	ATF7IP	N.S.
445.887	0.127951	0.346289	0.369492	0.711761	0.998563	ATF7IP2	N.S.
679.136	-0.17141	0.297769	-0.575646	0.564854	0.998563	ATG10	N.S.
2729.11	0.366233	0.230096	1.59166	0.111462	0.998563	ATG101	N.S.
1877.5	0.1797	0.25384	0.707926	0.478991	0.998563	ATG12	N.S.
5605.52	-0.0954128	0.200828	-0.475096	0.634718	0.998563	ATG13	N.S.
1569.14	0.255576	0.288873	0.884734	0.3763	0.998563	ATG14	N.S.
1722.26	-0.102617	0.224681	-0.456724	0.64787	0.998563	ATG16L1	N.S.
900.551	-0.1117	0.29302	-0.381203	0.703053	0.998563	ATG16L2	N.S.
2439.86	0.157774	0.267342	0.590159	0.555084	0.998563	ATG2A	N.S.
2312.58	-0.326213	0.338579	-0.963476	0.335309	0.998563	ATG2B	N.S.
2805.15	0.426642	0.215352	1.98114	0.0475757	0.998563	ATG3	N.S.
859.704	0.143432	0.254302	0.564021	0.57274	0.998563	ATG4A	N.S.
4676.55	0.143903	0.207413	0.6938	0.487807	0.998563	ATG4B	N.S.
555.626	0.164428	0.314668	0.522544	0.601291	0.998563	ATG4C	N.S.
1006.5	0.456734	0.251493	1.81609	0.0693565	0.998563	ATG4D	N.S.
1849.01	0.0506028	0.221455	0.228502	0.819256	0.998563	ATG5	N.S.
1584.57	-0.384461	0.226974	-1.69385	0.0902934	0.998563	ATG7	N.S.
7105.39	0.183837	0.21526	0.854023	0.393092	0.998563	ATG9A	N.S.
45.6283	-0.766734	0.822467	-0.932237	0.351214	0.998563	ATG9B	N.S.
4203.82	-0.637835	0.276752	-2.30472	0.0211824	0.984198	ATHL1	N.S.
5543.46	0.0702695	0.264356	0.265814	0.790382	0.998563	ATIC	N.S.
774.521	-0.467729	0.288134	-1.62331	0.104524	0.998563	ATL1	N.S.
2406.64	-0.281934	0.23456	-1.20197	0.229375	0.998563	ATL2	N.S.
3773.14	-0.127459	0.229284	-0.5559	0.57828	0.998563	ATL3	N.S.
4082.69	-0.163208	0.246094	-0.663192	0.507208	0.998563	ATM	N.S.
4144.79	-0.0294152	0.211954	-0.138781	0.889623	0.999201	ATMIN	N.S.
8526.79	-0.00802664	0.201414	-0.0398515	0.968212	0.999201	ATN1	N.S.
0	NA	NA	NA	NA	NA	ATOH1	N.S.
41.3951	0.649253	0.798105	0.813493	0.415935	0.998563	ATOH7	N.S.
8.93278	0.531817	1.63107	0.326054	0.744383	0.998563	ATOH8	N.S.
2408.55	0.442592	0.225495	1.96276	0.0496743	0.998563	ATOX1	N.S.
0	NA	NA	NA	NA	NA	ATP10A	N.S.
0	NA	NA	NA	NA	NA	ATP10B	N.S.
1431.25	-0.551369	0.302987	-1.81978	0.0687924	0.998563	ATP10D	N.S.
4500.94	-0.707133	0.231573	-3.0536	0.0022611	0.41568	ATP11A	N.S.
5082.35	-0.279264	0.242947	-1.14949	0.250355	0.998563	ATP11B	N.S.
3441.71	-0.252418	0.218473	-1.15537	0.247938	0.998563	ATP11C	N.S.
0.527885	2.54669	4.88912	0.52089	0.602444	0.998563	ATP12A	N.S.
4715.82	-0.133616	0.208533	-0.640744	0.521689	0.998563	ATP13A1	N.S.
6278.88	0.068783	0.202219	0.340141	0.733751	0.998563	ATP13A2	N.S.
3315.94	-0.351743	0.270342	-1.3011	0.193223	0.998563	ATP13A3	N.S.
0.486161	-2.37303	4.89298	-0.484987	0.627685	0.998563	ATP13A4	N.S.
0	NA	NA	NA	NA	NA	ATP13A5	N.S.
10618.4	-0.122648	0.195894	-0.626094	0.531254	0.998563	ATP1A1	N.S.
0.739861	-2.97723	4.85622	-0.613076	0.539826	0.998563	ATP1A2	N.S.
1533.34	0.333603	0.262637	1.27021	0.204011	0.998563	ATP1A3	N.S.
0	NA	NA	NA	NA	NA	ATP1A4	N.S.
480.229	0.012017	0.31285	0.0384113	0.96936	0.999201	ATP1B1	N.S.
0.246872	1.48875	4.99504	0.298046	0.765668	0.998563	ATP1B2	N.S.
4065.37	0.0969783	0.231116	0.419608	0.674772	0.998563	ATP1B3	N.S.
0	NA	NA	NA	NA	NA	ATP1B4	N.S.
59.5584	-0.342747	0.67545	-0.507435	0.61185	0.998563	ATP2A1	N.S.
12253	-0.257351	0.201826	-1.27511	0.20227	0.998563	ATP2A2	N.S.
387.272	-0.371957	0.314827	-1.18146	0.237418	0.998563	ATP2A3	N.S.
6022.99	-0.324103	0.227046	-1.42748	0.153442	0.998563	ATP2B1	N.S.
1.199	1.10015	4.37346	0.251552	0.801387	0.998563	ATP2B2	N.S.
0.695674	-2.89132	4.86263	-0.5946	0.552111	0.998563	ATP2B3	N.S.
13796.4	-0.224255	0.212411	-1.05576	0.291076	0.998563	ATP2B4	N.S.
6567.74	0.0344027	0.212559	0.16185	0.871424	0.999201	ATP2C1	N.S.
5.85651	0.701204	2.23125	0.314265	0.75332	0.998563	ATP2C2	N.S.
6.12946	-0.768829	1.94017	-0.396269	0.691907	0.998563	ATP4A	N.S.
0	NA	NA	NA	NA	NA	ATP4B	N.S.
27503.4	0.155533	0.198467	0.783673	0.433232	0.998563	ATP5A1	N.S.
29201.2	0.0502424	0.205921	0.243989	0.807239	0.998563	ATP5B	N.S.
6729.15	0.131785	0.213217	0.61808	0.536522	0.998563	ATP5C1	N.S.
5644.39	-0.0341328	0.271376	-0.125777	0.899909	0.999201	ATP5D	N.S.
6499.98	0.39617	0.198576	1.99505	0.046037	0.998563	ATP5E	N.S.
2.27718	0.360158	2.99554	0.120231	0.9043	0.999201	ATP5EP2	N.S.
7622.33	0.279604	0.200219	1.39649	0.162566	0.998563	ATP5F1	N.S.
2377.03	0.0211899	0.301258	0.070338	0.943925	0.999201	ATP5G1	N.S.
7664.07	0.142037	0.222746	0.637665	0.523692	0.998563	ATP5G2	N.S.
12445.3	0.0469454	0.229429	0.204618	0.83787	0.998563	ATP5G3	N.S.
5273.93	0.356894	0.221864	1.60862	0.1077	0.998563	ATP5H	N.S.
1359.09	0.221589	0.257159	0.861682	0.388863	0.998563	ATP5I	N.S.
3099.32	0.193395	0.235011	0.822917	0.410555	0.998563	ATP5J	N.S.
4548.65	0.212452	0.219592	0.967483	0.333303	0.998563	ATP5J2	N.S.
1151.71	0.258685	0.26887	0.96212	0.335989	0.998563	ATP5J2-PTCD1	N.S.
6108.12	0.347049	0.220112	1.57669	0.114867	0.998563	ATP5L	N.S.
3.72573	-0.128599	2.394	-0.0537172	0.95716	0.999201	ATP5L2	N.S.
6109.15	0.241134	0.22372	1.07784	0.281106	0.998563	ATP5O	N.S.
797.38	0.0702118	0.308956	0.227255	0.820226	0.998563	ATP5S	N.S.
3111.34	0.312659	0.223272	1.40035	0.161408	0.998563	ATP5SL	N.S.
8647.95	0.310998	0.197189	1.57716	0.11476	0.998563	ATP6AP1	N.S.
95.8362	-0.0241564	0.588534	-0.0410451	0.96726	0.999201	ATP6AP1L	N.S.
12686	0.0657511	0.196698	0.334274	0.738173	0.998563	ATP6AP2	N.S.
11685.4	0.0803625	0.210723	0.381365	0.702932	0.998563	ATP6V0A1	N.S.
1636.61	-0.41099	0.246604	-1.6666	0.0955935	0.998563	ATP6V0A2	N.S.
0.986481	-3.39241	4.83844	-0.701137	0.483218	0.998563	ATP6V0A4	N.S.
7381.77	0.475309	0.208938	2.27488	0.0229131	0.994013	ATP6V0B	N.S.
25010.8	0.279095	0.21067	1.3248	0.185239	0.998563	ATP6V0C	N.S.
8878.11	0.224031	0.203238	1.10231	0.270326	0.998563	ATP6V0D1	N.S.
0	NA	NA	NA	NA	NA	ATP6V0D2	N.S.
7657.19	0.382785	0.215471	1.7765	0.0756508	0.998563	ATP6V0E1	N.S.
6372.28	0.367574	0.214926	1.71023	0.0872228	0.998563	ATP6V0E2	N.S.
6741.84	0.0237992	0.212544	0.111973	0.910845	0.999201	ATP6V1A	N.S.
18.7909	-1.47886	1.20443	-1.22785	0.219504	0.998563	ATP6V1B1	N.S.
4372.26	0.0364168	0.207744	0.175297	0.860847	0.998932	ATP6V1B2	N.S.
12172.9	-0.059419	0.198422	-0.299458	0.764591	0.998563	ATP6V1C1	N.S.
79.0824	-1.12894	0.660098	-1.71026	0.0872175	0.998563	ATP6V1C2	N.S.
2875.88	0.332707	0.238771	1.39341	0.163495	0.998563	ATP6V1D	N.S.
7460.1	0.276418	0.209718	1.31805	0.187487	0.998563	ATP6V1E1	N.S.
616.565	0.0256971	0.274591	0.093583	0.92544	0.999201	ATP6V1E2	N.S.
7090.53	0.298381	0.231681	1.2879	0.197783	0.998563	ATP6V1F	N.S.
6446.45	0.204139	0.202259	1.0093	0.312833	0.998563	ATP6V1G1	N.S.
18.6513	-1.22502	1.13349	-1.08075	0.27981	0.998563	ATP6V1G2	N.S.
15.4361	8.16135	2.00259	4.07541	4.59341e-05	0.0273452	ATP6V1G2-DDX39B	padj<0.05 & Upregulated
0	NA	NA	NA	NA	NA	ATP6V1G3	N.S.
6539.03	0.250303	0.214499	1.16692	0.243242	0.998563	ATP6V1H	N.S.
1453.68	-0.290421	0.261206	-1.11184	0.266205	0.998563	ATP7A	N.S.
1832.91	-0.363943	0.225678	-1.61267	0.106817	0.998563	ATP7B	N.S.
588.536	-0.297459	0.280233	-1.06147	0.288477	0.998563	ATP8A1	N.S.
212.202	-0.477983	0.39456	-1.21143	0.225729	0.998563	ATP8A2	N.S.
359.342	-0.796382	0.348187	-2.28723	0.0221826	0.989438	ATP8B1	N.S.
10207.5	-0.168252	0.200129	-0.840719	0.400506	0.998563	ATP8B2	N.S.
472.657	-0.0932395	0.324112	-0.287677	0.773594	0.998563	ATP8B3	N.S.
2.38226	-4.63386	3.68938	-1.256	0.209117	0.998563	ATP8B4	N.S.
5023.02	-0.340736	0.222956	-1.52826	0.126447	0.998563	ATP9A	N.S.
809.011	-0.416007	0.269609	-1.543	0.12283	0.998563	ATP9B	N.S.
3463.59	0.199314	0.210262	0.947932	0.343164	0.998563	ATPAF1	N.S.
1639.83	0.33343	0.23056	1.44618	0.148127	0.998563	ATPAF2	N.S.
3196.6	0.149292	0.237435	0.628773	0.529498	0.998563	ATPIF1	N.S.
1625.5	-0.607902	0.269634	-2.25455	0.0241617	0.998563	ATR	N.S.
3508.69	0.0812208	0.241699	0.336042	0.73684	0.998563	ATRAID	N.S.
978.267	0.279112	0.245542	1.13672	0.255657	0.998563	ATRIP	N.S.
6795.83	-0.162716	0.246571	-0.659916	0.509307	0.998563	ATRN	N.S.
60.3373	0.770031	0.668971	1.15107	0.249704	0.998563	ATRNL1	N.S.
3949.43	-0.815611	0.267108	-3.05348	0.00226203	0.41568	ATRX	N.S.
2.34211	1.69992	3.34082	0.508832	0.61087	0.998563	ATXN1	N.S.
7316.29	0.0341031	0.216428	0.157572	0.874794	0.999201	ATXN10	N.S.
3298.47	-0.323368	0.28145	-1.14894	0.250582	0.998563	ATXN1L	N.S.
3596.15	0.2427	0.216235	1.12239	0.261697	0.998563	ATXN2	N.S.
12400.9	0.0545875	0.196867	0.277281	0.781564	0.998563	ATXN2L	N.S.
1189.6	-0.00967634	0.263402	-0.0367361	0.970695	0.999201	ATXN3	N.S.
0	NA	NA	NA	NA	NA	ATXN3L	N.S.
1024.3	-0.686402	0.304978	-2.25066	0.024407	0.998563	ATXN7	N.S.
334.393	-0.340604	0.328391	-1.03719	0.299647	0.998563	ATXN7L1	N.S.
569.462	0.339949	0.294033	1.15616	0.247616	0.998563	ATXN7L2	N.S.
7700.7	-0.191444	0.198354	-0.965163	0.334463	0.998563	ATXN7L3	N.S.
8269.07	-0.046904	0.199577	-0.235017	0.814196	0.998563	ATXN7L3B	N.S.
478.583	0.326437	0.302511	1.07909	0.280546	0.998563	AUH	N.S.
196.967	0.152293	0.415655	0.366392	0.714072	0.998563	AUNIP	N.S.
10982.1	0.0937293	0.218495	0.428977	0.66794	0.998563	AUP1	N.S.
1023.67	-0.263886	0.290305	-0.908994	0.363353	0.998563	AURKA	N.S.
5444.16	0.194306	0.237527	0.818041	0.413334	0.998563	AURKAIP1	N.S.
548.515	-0.481648	0.400214	-1.20348	0.228792	0.998563	AURKB	N.S.
11.3293	1.61291	1.48846	1.08361	0.278539	0.998563	AURKC	N.S.
589.527	0.0773581	0.351468	0.2201	0.825793	0.998563	AUTS2	N.S.
360.84	0.254421	0.318748	0.798188	0.424761	0.998563	AVEN	N.S.
30.3184	-0.604522	0.903074	-0.669405	0.503237	0.998563	AVIL	N.S.
2207.43	-0.416099	0.246421	-1.68857	0.0913016	0.998563	AVL9	N.S.
0	NA	NA	NA	NA	NA	AVP	N.S.
1255.22	0.158173	0.237224	0.666767	0.504921	0.998563	AVPI1	N.S.
0.243081	-1.37948	4.99696	-0.276065	0.782498	0.998563	AVPR1A	N.S.
0	NA	NA	NA	NA	NA	AVPR1B	N.S.
5.86414	-1.63409	2.33111	-0.700994	0.483307	0.998563	AVPR2	N.S.
0	NA	NA	NA	NA	NA	AWAT1	N.S.
0	NA	NA	NA	NA	NA	AWAT2	N.S.
6.59385	3.70924	2.01275	1.84287	0.0653477	0.998563	AXDND1	N.S.
1886.92	-0.0322803	0.223597	-0.144368	0.88521	0.999201	AXIN1	N.S.
422.29	-0.387212	0.304337	-1.27232	0.203261	0.998563	AXIN2	N.S.
50.8855	0.311638	0.737293	0.422679	0.67253	0.998563	AXL	N.S.
0	NA	NA	NA	NA	NA	AZGP1	N.S.
2684.67	0.175678	0.25687	0.68392	0.494025	0.998563	AZI2	N.S.
10768.2	-0.0626015	0.243206	-0.257401	0.796869	0.998563	AZIN1	N.S.
409.779	0.236798	0.320083	0.739803	0.459419	0.998563	AZIN2	N.S.
113.314	-0.714958	0.656269	-1.08943	0.275965	0.998563	AZU1	N.S.
17281.1	0.186785	0.214833	0.869441	0.384606	0.998563	B2M	N.S.
0.263943	1.53742	4.99164	0.307999	0.758083	0.998563	B3GALNT1	N.S.
789.25	-0.145278	0.263763	-0.550788	0.581779	0.998563	B3GALNT2	N.S.
898.727	-0.420091	0.355458	-1.18183	0.237273	0.998563	B3GALT1	N.S.
3609	-0.498368	0.207427	-2.40262	0.0162783	0.890405	B3GALT2	N.S.
110.954	-0.484151	0.51041	-0.948554	0.342848	0.998563	B3GALT4	N.S.
0.972322	-3.37255	4.83918	-0.696925	0.48585	0.998563	B3GALT5	N.S.
3955.18	0.00562069	0.258889	0.0217109	0.982679	0.999201	B3GALT6	N.S.
27.3606	0.492635	0.987945	0.498646	0.618028	0.998563	B3GAT1	N.S.
68.515	-0.461578	0.626545	-0.736703	0.461303	0.998563	B3GAT2	N.S.
4280.67	0.173447	0.244811	0.708495	0.478638	0.998563	B3GAT3	N.S.
758.199	-0.00296489	0.261662	-0.011331	0.990959	0.999201	B3GLCT	N.S.
2249.98	-0.0494777	0.218632	-0.226306	0.820964	0.998563	B3GNT2	N.S.
0	NA	NA	NA	NA	NA	B3GNT3	N.S.
695.98	-0.348173	0.320498	-1.08635	0.277323	0.998563	B3GNT4	N.S.
255.888	-0.773575	0.403626	-1.91656	0.0552936	0.998563	B3GNT5	N.S.
0	NA	NA	NA	NA	NA	B3GNT6	N.S.
3.23334	-0.150656	2.8409	-0.053031	0.957707	0.999201	B3GNT7	N.S.
1.50243	-0.896506	3.9491	-0.227015	0.820412	0.998563	B3GNT8	N.S.
108.102	0.0302122	0.525252	0.0575193	0.954132	0.999201	B3GNT9	N.S.
378.989	0.202215	0.367068	0.550893	0.581707	0.998563	B3GNTL1	N.S.
6747.39	-0.289888	0.199628	-1.45214	0.146464	0.998563	B4GALNT1	N.S.
0	NA	NA	NA	NA	NA	B4GALNT2	N.S.
190.671	-0.509616	0.410309	-1.24203	0.214226	0.998563	B4GALNT3	N.S.
6249.93	-0.294034	0.24658	-1.19245	0.233085	0.998563	B4GALNT4	N.S.
4562.62	-0.244324	0.208733	-1.17051	0.241795	0.998563	B4GALT1	N.S.
5468.36	0.00802433	0.211334	0.0379698	0.969712	0.999201	B4GALT2	N.S.
4814.07	0.337061	0.207838	1.62175	0.104858	0.998563	B4GALT3	N.S.
971.909	0.151988	0.254862	0.596356	0.550938	0.998563	B4GALT4	N.S.
2388.6	-0.385293	0.225526	-1.70842	0.0875578	0.998563	B4GALT5	N.S.
732.18	-0.390501	0.289439	-1.34916	0.177285	0.998563	B4GALT6	N.S.
1437.15	0.0877228	0.268187	0.327095	0.743596	0.998563	B4GALT7	N.S.
3696.66	0.236565	0.219159	1.07942	0.280401	0.998563	B4GAT1	N.S.
610.806	-0.268821	0.37152	-0.723571	0.469329	0.998563	B9D1	N.S.
180.927	0.196259	0.427292	0.45931	0.646012	0.998563	B9D2	N.S.
4.85371	-1.49395	2.74286	-0.544667	0.585982	0.998563	BAALC	N.S.
3.3575	-2.5722	2.81292	-0.914425	0.360493	0.998563	BAAT	N.S.
3807.43	0.128871	0.222457	0.579308	0.562382	0.998563	BABAM1	N.S.
2663.98	-0.0399036	0.255803	-0.155994	0.876038	0.999201	BACE1	N.S.
929.42	-0.382691	0.260352	-1.4699	0.141588	0.998563	BACE2	N.S.
1689.82	-0.203349	0.272558	-0.746076	0.455621	0.998563	BACH1	N.S.
36.5327	-3.02774	1.13854	-2.65931	0.00782999	0.692213	BACH2	N.S.
2956.6	0.555527	0.219913	2.52613	0.0115328	0.820081	BAD	N.S.
3466.77	0.507221	0.256582	1.97684	0.0480601	0.998563	BAG1	N.S.
1478.68	0.0391085	0.229284	0.170568	0.864563	0.999135	BAG2	N.S.
5961.65	-0.00805174	0.204382	-0.0393955	0.968575	0.999201	BAG3	N.S.
1337.28	-0.220508	0.236996	-0.930428	0.35215	0.998563	BAG4	N.S.
2101.87	-0.181931	0.227882	-0.798356	0.424664	0.998563	BAG5	N.S.
14176.1	0.0911836	0.203917	0.44716	0.654759	0.998563	BAG6	N.S.
0	NA	NA	NA	NA	NA	BAGE5	N.S.
1837.15	-0.373978	0.236903	-1.57861	0.114425	0.998563	BAHCC1	N.S.
2771.9	-0.162048	0.230861	-0.701926	0.482725	0.998563	BAHD1	N.S.
4399.84	-0.279357	0.205953	-1.35641	0.174968	0.998563	BAIAP2	N.S.
3389.4	-0.0654479	0.214197	-0.30555	0.759947	0.998563	BAIAP2L1	N.S.
27.5911	-0.805263	0.943973	-0.853058	0.393627	0.998563	BAIAP2L2	N.S.
554.608	-0.450046	0.352814	-1.27559	0.2021	0.998563	BAIAP3	N.S.
4453.4	0.13488	0.2061	0.654438	0.51283	0.998563	BAK1	N.S.
46.9654	1.09638	0.748082	1.46559	0.142759	0.998563	BAMBI	N.S.
8602.03	0.220909	0.231862	0.952761	0.340711	0.998563	BANF1	N.S.
0	NA	NA	NA	NA	NA	BANF2	N.S.
2.46207	1.24318	3.24042	0.383649	0.701239	0.998563	BANK1	N.S.
780.048	0.326666	0.29685	1.10044	0.27114	0.998563	BANP	N.S.
9765.26	0.127844	0.20613	0.62021	0.535119	0.998563	BAP1	N.S.
518.738	0.125083	0.320985	0.389685	0.69677	0.998563	BARD1	N.S.
4.16097	-0.201206	2.57811	-0.078044	0.937793	0.999201	BARHL1	N.S.
159.785	-0.0069797	0.430256	-0.0162222	0.987057	0.999201	BARHL2	N.S.
6682.57	0.0529442	0.224912	0.2354	0.813898	0.998563	BARX1	N.S.
0.493492	0.0391052	4.99378	0.00783079	0.993752	0.999201	BARX2	N.S.
21.9861	-0.325241	1.06808	-0.30451	0.760739	0.998563	BASP1	N.S.
0	NA	NA	NA	NA	NA	BATF	N.S.
489.524	-0.353821	0.378155	-0.935651	0.349453	0.998563	BATF2	N.S.
409.027	0.369921	0.395884	0.934417	0.350089	0.998563	BATF3	N.S.
12784.4	0.348584	0.223444	1.56005	0.118748	0.998563	BAX	N.S.
2044.33	-0.153532	0.259273	-0.592165	0.55374	0.998563	BAZ1A	N.S.
5165.13	-0.206619	0.222303	-0.929445	0.352658	0.998563	BAZ1B	N.S.
7383.31	-0.403221	0.227994	-1.76856	0.076967	0.998563	BAZ2A	N.S.
969.588	-0.763217	0.317563	-2.40335	0.0162455	0.890405	BAZ2B	N.S.
4682.73	-0.30678	0.258999	-1.18448	0.236222	0.998563	BBC3	N.S.
368.504	-0.138878	0.335913	-0.413434	0.679289	0.998563	BBIP1	N.S.
221.801	-0.284507	0.393746	-0.722564	0.469948	0.998563	BBOF1	N.S.
0	NA	NA	NA	NA	NA	BBOX1	N.S.
1344.93	-0.327862	0.245763	-1.33406	0.182184	0.998563	BBS1	N.S.
986.952	0.00288768	0.249271	0.0115845	0.990757	0.999201	BBS10	N.S.
456.572	0.188258	0.301206	0.625016	0.531961	0.998563	BBS12	N.S.
2665.95	-0.0836638	0.242137	-0.345522	0.729702	0.998563	BBS2	N.S.
1634.36	-0.0412782	0.22529	-0.183223	0.854623	0.998563	BBS4	N.S.
1497.09	0.231733	0.23443	0.988496	0.32291	0.998563	BBS5	N.S.
1359.16	-0.0625928	0.235825	-0.265421	0.790686	0.998563	BBS7	N.S.
1005.98	-0.119053	0.26015	-0.457632	0.647217	0.998563	BBS9	N.S.
3012.46	-0.163885	0.322964	-0.50744	0.611846	0.998563	BBX	N.S.
3013.02	-0.0787539	0.24334	-0.323638	0.746212	0.998563	BCAM	N.S.
27.0318	-0.559151	1.01363	-0.551631	0.581201	0.998563	BCAN	N.S.
2341.73	-0.0263317	0.218351	-0.120593	0.904013	0.999201	BCAP29	N.S.
17784.6	0.258941	0.203784	1.27067	0.203848	0.998563	BCAP31	N.S.
6608.47	0.290617	0.200213	1.45154	0.146629	0.998563	BCAR1	N.S.
524.304	-0.174757	0.300173	-0.582188	0.56044	0.998563	BCAR3	N.S.
17.7039	1.44971	1.24486	1.16455	0.244201	0.998563	BCAS1	N.S.
1501.23	0.208887	0.248683	0.83997	0.400925	0.998563	BCAS2	N.S.
1633.06	0.0445205	0.259449	0.171596	0.863755	0.999132	BCAS3	N.S.
670.25	0.286606	0.31596	0.907097	0.364356	0.998563	BCAS4	N.S.
1.58366	4.13432	4.72535	0.874924	0.381615	0.998563	BCAT1	N.S.
4038.05	0.360927	0.230705	1.56446	0.11771	0.998563	BCAT2	N.S.
3893.83	0.207224	0.212452	0.97539	0.329367	0.998563	BCCIP	N.S.
625.048	0.178495	0.27254	0.65493	0.512513	0.998563	BCDIN3D	N.S.
147.186	-0.306248	0.600768	-0.509761	0.610219	0.998563	BCHE	N.S.
1080.28	0.219215	0.27853	0.787044	0.431256	0.998563	BCKDHA	N.S.
901.178	-0.112301	0.270099	-0.415777	0.677573	0.998563	BCKDHB	N.S.
2016.49	-0.294673	0.299673	-0.983313	0.325454	0.998563	BCKDK	N.S.
868.581	-0.183331	0.256949	-0.713492	0.475542	0.998563	BCL10	N.S.
2.98566	1.14975	2.91347	0.394633	0.693114	0.998563	BCL11A	N.S.
9.82217	-0.228297	1.62378	-0.140596	0.888189	0.999201	BCL11B	N.S.
14.3463	-0.837259	1.33368	-0.627782	0.530147	0.998563	BCL2	N.S.
4.96596	-1.81991	2.40766	-0.755884	0.449718	0.998563	BCL2A1	N.S.
3512.5	-0.169543	0.215484	-0.786802	0.431398	0.998563	BCL2L1	N.S.
3.72435	-0.950568	2.38991	-0.397743	0.69082	0.998563	BCL2L10	N.S.
684.681	0.0770911	0.316777	0.243361	0.807726	0.998563	BCL2L11	N.S.
2279.94	0.39011	0.239725	1.62732	0.103669	0.998563	BCL2L12	N.S.
2595.03	-0.0626117	0.213932	-0.292672	0.769773	0.998563	BCL2L13	N.S.
1.94422	3.62016	4.01041	0.902691	0.36669	0.998563	BCL2L14	N.S.
14.0078	-1.9886	1.41771	-1.40268	0.160711	0.998563	BCL2L15	N.S.
1381.94	0.0178137	0.239213	0.0744681	0.940638	0.999201	BCL2L2	N.S.
580.924	-0.0208353	0.341615	-0.0609907	0.951367	0.999201	BCL2L2-PABPN1	N.S.
851.284	-0.32771	0.310275	-1.05619	0.29088	0.998563	BCL3	N.S.
261.933	-0.5609	0.355933	-1.57586	0.115059	0.998563	BCL6	N.S.
8.91539	2.23292	1.81883	1.22767	0.219571	0.998563	BCL6B	N.S.
1864.55	-0.0442482	0.235922	-0.187555	0.851226	0.998563	BCL7A	N.S.
3213.68	0.130767	0.213011	0.613896	0.539284	0.998563	BCL7B	N.S.
5772.8	0.0515156	0.249231	0.206698	0.836245	0.998563	BCL7C	N.S.
3836.75	-0.473025	0.258126	-1.83253	0.0668719	0.998563	BCL9	N.S.
4871.66	-0.836078	0.219697	-3.80559	0.000141465	0.0625313	BCL9L	N.S.
7489.37	-0.328155	0.225157	-1.45745	0.144993	0.998563	BCLAF1	N.S.
0.243081	-1.37948	4.99696	-0.276065	0.782498	0.998563	BCO1	N.S.
12.5998	0.730562	1.42073	0.514216	0.607101	0.998563	BCO2	N.S.
3019.99	-0.244602	0.217692	-1.12362	0.261175	0.998563	BCOR	N.S.
4589.23	0.00532826	0.25476	0.0209148	0.983314	0.999201	BCORL1	N.S.
6693.28	-0.0170149	0.209514	-0.0812111	0.935274	0.999201	BCR	N.S.
1692.21	0.120561	0.237111	0.508455	0.611134	0.998563	BCS1L	N.S.
2.24655	2.79489	3.41658	0.818038	0.413335	0.998563	BDH1	N.S.
402.257	0.101853	0.354785	0.287084	0.774048	0.998563	BDH2	N.S.
0	NA	NA	NA	NA	NA	BDKRB1	N.S.
0	NA	NA	NA	NA	NA	BDKRB2	N.S.
126.252	-0.533219	0.550772	-0.96813	0.33298	0.998563	BDNF	N.S.
1968.03	-0.269446	0.238326	-1.13058	0.258233	0.998563	BDP1	N.S.
121.182	0.981176	0.483818	2.02799	0.0425617	0.998563	BEAN1	N.S.
4255.13	0.148613	0.210313	0.706629	0.479797	0.998563	BECN1	N.S.
0	NA	NA	NA	NA	NA	BECN2	N.S.
475.048	-0.161656	0.313987	-0.51485	0.606658	0.998563	BEGAIN	N.S.
0.243081	-1.37948	4.99696	-0.276065	0.782498	0.998563	BEND2	N.S.
690.429	-0.310826	0.273374	-1.137	0.255539	0.998563	BEND3	N.S.
1394.82	-0.199054	0.284191	-0.700422	0.483664	0.998563	BEND4	N.S.
3.06499	-0.259965	2.90013	-0.089639	0.928574	0.999201	BEND5	N.S.
201.793	0.396683	0.45945	0.863387	0.387925	0.998563	BEND6	N.S.
998.612	-0.378767	0.284325	-1.33216	0.182807	0.998563	BEND7	N.S.
41.902	0.0216213	0.774136	0.0279296	0.977718	0.999201	BEST1	N.S.
2.21548	-0.93954	3.37489	-0.278392	0.780712	0.998563	BEST2	N.S.
0	NA	NA	NA	NA	NA	BEST3	N.S.
2.47593	0.624039	2.93196	0.21284	0.831451	0.998563	BEST4	N.S.
1071.53	0.116041	0.250446	0.463338	0.643122	0.998563	BET1	N.S.
5466.61	0.559504	0.207151	2.70094	0.00691432	0.657981	BET1L	N.S.
0	NA	NA	NA	NA	NA	BEX1	N.S.
114.111	-0.063082	0.514712	-0.122558	0.902457	0.999201	BEX2	N.S.
1967.73	0.248247	0.243361	1.02008	0.307691	0.998563	BEX4	N.S.
0	NA	NA	NA	NA	NA	BEX5	N.S.
4567.01	-0.198225	0.205622	-0.964028	0.335032	0.998563	BFAR	N.S.
15.0739	-0.60144	1.29096	-0.465887	0.641296	0.998563	BFSP1	N.S.
0	NA	NA	NA	NA	NA	BFSP2	N.S.
2.76615	0.311436	2.75373	0.113096	0.909954	0.999201	BGLAP	N.S.
1.57311	-1.11026	3.85847	-0.287747	0.77354	0.998563	BGN	N.S.
49.9069	-0.693991	0.71881	-0.965471	0.334309	0.998563	BHLHA15	N.S.
3.759	0.267041	2.38307	0.112057	0.910778	0.999201	BHLHA9	N.S.
1382.69	-0.0784403	0.298867	-0.262459	0.792968	0.998563	BHLHB9	N.S.
0.740085	-0.963092	4.88909	-0.196988	0.843837	0.998563	BHLHE22	N.S.
0	NA	NA	NA	NA	NA	BHLHE23	N.S.
4268.15	-0.819341	0.206823	-3.96155	7.44634e-05	0.0392855	BHLHE40	padj<0.05 & Downregulated
6.03305	-1.99904	2.31299	-0.864268	0.38744	0.998563	BHLHE41	N.S.
1.22643	-3.7069	4.71363	-0.786421	0.431621	0.998563	BHMG1	N.S.
0	NA	NA	NA	NA	NA	BHMT	N.S.
0	NA	NA	NA	NA	NA	BHMT2	N.S.
14.1068	-0.210192	1.29022	-0.162912	0.870587	0.999201	BICC1	N.S.
580.142	-0.0545826	0.278755	-0.195808	0.84476	0.998563	BICD1	N.S.
4007.48	-0.0150248	0.231951	-0.0647757	0.948353	0.999201	BICD2	N.S.
1911.43	0.282303	0.230075	1.227	0.219821	0.998563	BID	N.S.
188.168	0.184266	0.472365	0.390092	0.696469	0.998563	BIK	N.S.
3285.55	0.44961	0.219251	2.05066	0.0403001	0.998563	BIN1	N.S.
7.50618	0.586847	1.79242	0.327405	0.743362	0.998563	BIN2	N.S.
671.985	0.0215574	0.268214	0.0803739	0.93594	0.999201	BIN3	N.S.
3092.34	0.10639	0.240196	0.44293	0.657816	0.998563	BIRC2	N.S.
205.488	-0.796579	0.40794	-1.95269	0.0508569	0.998563	BIRC3	N.S.
2126.11	-0.131826	0.357855	-0.368379	0.712591	0.998563	BIRC5	N.S.
6210.11	0.172613	0.206942	0.834112	0.404218	0.998563	BIRC6	N.S.
0	NA	NA	NA	NA	NA	BIRC7	N.S.
0	NA	NA	NA	NA	NA	BIRC8	N.S.
1802.87	-0.151077	0.227208	-0.664931	0.506095	0.998563	BIVM	N.S.
418.772	-1.01668	0.393786	-2.58181	0.00982836	0.787955	BIVM-ERCC5	N.S.
0	NA	NA	NA	NA	NA	BLACE	N.S.
1902.29	0.122309	0.229368	0.533243	0.593865	0.998563	BLCAP	N.S.
0	NA	NA	NA	NA	NA	BLID	N.S.
20.3717	-1.46772	1.11805	-1.31275	0.189266	0.998563	BLK	N.S.
354.522	0.0963089	0.333381	0.288886	0.772669	0.998563	BLM	N.S.
6697.48	0.130924	0.199217	0.657191	0.511058	0.998563	BLMH	N.S.
0	NA	NA	NA	NA	NA	BLNK	N.S.
2055.53	0.24199	0.254535	0.950711	0.341751	0.998563	BLOC1S1	N.S.
3976.22	0.247587	0.205518	1.2047	0.228319	0.998563	BLOC1S2	N.S.
1549.74	0.470198	0.28639	1.64181	0.100629	0.998563	BLOC1S3	N.S.
1892.86	-0.00485536	0.265087	-0.0183161	0.985387	0.999201	BLOC1S4	N.S.
856.236	-0.0826456	0.259932	-0.317951	0.750522	0.998563	BLOC1S5	N.S.
8.26474	-6.4598	2.66524	-2.42372	0.0153626	0.890405	BLOC1S5-TXNDC5	N.S.
3524.04	-0.163813	0.242134	-0.676541	0.498697	0.998563	BLOC1S6	N.S.
2413.87	0.0613562	0.245733	0.249686	0.80283	0.998563	BLVRA	N.S.
11617	0.00832718	0.234348	0.0355334	0.971654	0.999201	BLVRB	N.S.
1816.95	-0.0251069	0.239228	-0.10495	0.916416	0.999201	BLZF1	N.S.
417.461	-0.440121	0.304503	-1.44537	0.148353	0.998563	BMF	N.S.
3744.76	0.0548356	0.219232	0.250125	0.80249	0.998563	BMI1	N.S.
3506.84	-0.312392	0.206485	-1.51291	0.130303	0.998563	BMP1	N.S.
0	NA	NA	NA	NA	NA	BMP10	N.S.
0	NA	NA	NA	NA	NA	BMP15	N.S.
300.383	-0.0237256	0.393596	-0.0602789	0.951933	0.999201	BMP2	N.S.
872.596	-0.235932	0.256494	-0.919834	0.35766	0.998563	BMP2K	N.S.
74.4085	-0.111594	0.602056	-0.185355	0.852951	0.998563	BMP3	N.S.
221.207	0.287267	0.403593	0.711774	0.476605	0.998563	BMP4	N.S.
1.46114	-2.26278	4.48437	-0.504592	0.613845	0.998563	BMP5	N.S.
2.02994	0.106688	3.47767	0.0306781	0.975526	0.999201	BMP6	N.S.
3554.45	0.141832	0.212022	0.668949	0.503528	0.998563	BMP7	N.S.
118.186	0.105529	0.511549	0.206293	0.836562	0.998563	BMP8A	N.S.
1185.25	-0.467895	0.239941	-1.95004	0.0511708	0.998563	BMP8B	N.S.
11.0302	-1.38916	1.82876	-0.759622	0.44748	0.998563	BMPER	N.S.
4422.92	-0.189092	0.242121	-0.780983	0.434813	0.998563	BMPR1A	N.S.
4199.96	-0.445687	0.222152	-2.00622	0.0448323	0.998563	BMPR1B	N.S.
7908.76	-0.104588	0.230139	-0.454454	0.649502	0.998563	BMPR2	N.S.
4402.7	0.0787109	0.204968	0.384015	0.700967	0.998563	BMS1	N.S.
1.7281	4.26339	4.55599	0.935779	0.349387	0.998563	BMX	N.S.
2.10171	0.533856	3.43452	0.155438	0.876476	0.999201	BNC1	N.S.
10.7765	-3.0923	1.82669	-1.69284	0.0904859	0.998563	BNC2	N.S.
818.961	0.427422	0.270477	1.58025	0.11405	0.998563	BNIP1	N.S.
3237.36	-0.108065	0.219193	-0.493011	0.622005	0.998563	BNIP2	N.S.
4680.39	0.1939	0.209455	0.925733	0.354585	0.998563	BNIP3	N.S.
3782.93	-0.190776	0.250183	-0.762546	0.445734	0.998563	BNIP3L	N.S.
73.2213	0.503604	0.693892	0.725767	0.467981	0.998563	BNIPL	N.S.
389.27	-0.227418	0.331218	-0.686612	0.492327	0.998563	BOC	N.S.
3788.58	0.244475	0.210008	1.16412	0.244376	0.998563	BOD1	N.S.
3287.81	-0.282095	0.238789	-1.18136	0.23746	0.998563	BOD1L1	N.S.
0	NA	NA	NA	NA	NA	BOD1L2	N.S.
3251.93	-0.0334493	0.231563	-0.14445	0.885145	0.999201	BOK	N.S.
1237.53	0.454131	0.24912	1.82294	0.0683128	0.998563	BOLA1	N.S.
650.401	0.0659497	0.321595	0.205071	0.837517	0.998563	BOLA2	N.S.
573.04	-0.0938892	0.301701	-0.311199	0.755649	0.998563	BOLA2B	N.S.
1344.15	0.407485	0.249391	1.63392	0.102276	0.998563	BOLA3	N.S.
2.33318	1.92119	3.6514	0.52615	0.598784	0.998563	BOLL	N.S.
7321.21	-0.0119564	0.252926	-0.0472723	0.962296	0.999201	BOP1	N.S.
296.214	-0.153578	0.424209	-0.362035	0.717326	0.998563	BORA	N.S.
711.211	0.173852	0.311325	0.558427	0.576553	0.998563	BORCS5	N.S.
3484.91	-0.142198	0.281536	-0.505081	0.613502	0.998563	BORCS6	N.S.
1120.61	-0.0108308	0.241	-0.0449409	0.964154	0.999201	BORCS7	N.S.
0	NA	NA	NA	NA	NA	BORCS7-ASMT	N.S.
1216.86	-0.0565582	0.296505	-0.19075	0.848722	0.998563	BORCS8	N.S.
269.415	0.0824171	0.395593	0.208338	0.834965	0.998563	BORCS8-MEF2B	N.S.
1064.5	0.279268	0.260367	1.07259	0.283454	0.998563	BPGM	N.S.
1641.73	-0.0639683	0.226897	-0.281927	0.778	0.998563	BPHL	N.S.
0	NA	NA	NA	NA	NA	BPI	N.S.
0	NA	NA	NA	NA	NA	BPIFA1	N.S.
0	NA	NA	NA	NA	NA	BPIFA2	N.S.
0	NA	NA	NA	NA	NA	BPIFA3	N.S.
0	NA	NA	NA	NA	NA	BPIFB1	N.S.
0	NA	NA	NA	NA	NA	BPIFB2	N.S.
0	NA	NA	NA	NA	NA	BPIFB3	N.S.
0.972322	-3.37255	4.83918	-0.696925	0.48585	0.998563	BPIFB4	N.S.
0	NA	NA	NA	NA	NA	BPIFB6	N.S.
1.05577	3.54871	4.83714	0.733639	0.463169	0.998563	BPIFC	N.S.
3668.15	0.277786	0.218069	1.27384	0.202719	0.998563	BPNT1	N.S.
7076.83	-0.196897	0.212666	-0.925849	0.354525	0.998563	BPTF	N.S.
0	NA	NA	NA	NA	NA	BPY2	N.S.
0	NA	NA	NA	NA	NA	BPY2B	N.S.
0	NA	NA	NA	NA	NA	BPY2C	N.S.
1276.09	-0.118793	0.246805	-0.481321	0.630288	0.998563	BRAF	N.S.
1814.06	0.13378	0.247171	0.541243	0.58834	0.998563	BRAP	N.S.
5991.49	0.126872	0.211998	0.598457	0.549535	0.998563	BRAT1	N.S.
1276.64	0.484716	0.252352	1.92079	0.0547576	0.998563	BRCA1	N.S.
596.211	-0.492308	0.397381	-1.23888	0.215389	0.998563	BRCA2	N.S.
903.529	-0.166476	0.250405	-0.664825	0.506162	0.998563	BRCC3	N.S.
2138.42	0.105564	0.236471	0.446412	0.6553	0.998563	BRD1	N.S.
19311.1	-0.0770356	0.206312	-0.373394	0.708855	0.998563	BRD2	N.S.
4156.4	-0.0575488	0.233073	-0.246913	0.804975	0.998563	BRD3	N.S.
9517.37	-0.215904	0.238854	-0.903919	0.366039	0.998563	BRD4	N.S.
4698.79	-0.0138007	0.212245	-0.0650224	0.948156	0.999201	BRD7	N.S.
3983.67	-0.237457	0.232152	-1.02285	0.306379	0.998563	BRD8	N.S.
2237.25	-0.295256	0.230266	-1.28224	0.199759	0.998563	BRD9	N.S.
0.246872	1.48875	4.99504	0.298046	0.765668	0.998563	BRDT	N.S.
1594.73	0.00174588	0.242617	0.00719603	0.994258	0.999201	BRE	N.S.
3619.6	0.113304	0.208212	0.544179	0.586318	0.998563	BRF1	N.S.
1475.18	0.204583	0.28758	0.711397	0.476838	0.998563	BRF2	N.S.
8879.48	0.301274	0.209082	1.44094	0.149601	0.998563	BRI3	N.S.
2282.68	-0.0981219	0.223104	-0.439804	0.660079	0.998563	BRI3BP	N.S.
89.0257	0.998042	0.549268	1.81704	0.0692111	0.998563	BRICD5	N.S.
32.5596	-0.0157386	0.892576	-0.0176328	0.985932	0.999201	BRINP1	N.S.
0	NA	NA	NA	NA	NA	BRINP2	N.S.
1.2331	-3.71442	4.82775	-0.76939	0.441662	0.998563	BRINP3	N.S.
344.19	-0.00754446	0.427342	-0.0176544	0.985915	0.999201	BRIP1	N.S.
2258.04	0.186853	0.241464	0.773834	0.439029	0.998563	BRIX1	N.S.
7918.99	0.257992	0.202197	1.27595	0.201974	0.998563	BRK1	N.S.
2718.55	0.30926	0.217785	1.42003	0.1556	0.998563	BRMS1	N.S.
1046.97	-0.100736	0.243724	-0.413319	0.679373	0.998563	BRMS1L	N.S.
3848.17	0.112767	0.250511	0.450148	0.652604	0.998563	BROX	N.S.
2121.52	-0.00856321	0.226646	-0.0377824	0.969861	0.999201	BRPF1	N.S.
3277.52	-0.0634961	0.21058	-0.30153	0.763011	0.998563	BRPF3	N.S.
1.05577	3.54871	4.83714	0.733639	0.463169	0.998563	BRS3	N.S.
1165.13	0.397867	0.25413	1.5656	0.117442	0.998563	BRSK1	N.S.
1982.26	-0.209988	0.234653	-0.894889	0.370847	0.998563	BRSK2	N.S.
1581.19	-0.1957	0.22829	-0.857242	0.391311	0.998563	BRWD1	N.S.
1655.3	-0.521395	0.345491	-1.50914	0.131263	0.998563	BRWD3	N.S.
1202.59	0.447996	0.243379	1.84074	0.06566	0.998563	BSCL2	N.S.
4880.51	-0.226056	0.20329	-1.11199	0.266144	0.998563	BSDC1	N.S.
25164.7	0.254267	0.204047	1.24612	0.212721	0.998563	BSG	N.S.
490.466	-0.577311	0.448079	-1.28841	0.197602	0.998563	BSN	N.S.
0.243081	-1.37948	4.99696	-0.276065	0.782498	0.998563	BSND	N.S.
0	NA	NA	NA	NA	NA	BSPH1	N.S.
99.8744	-0.234036	0.54815	-0.426956	0.669412	0.998563	BSPRY	N.S.
10.7532	0.140898	1.47348	0.0956227	0.92382	0.999201	BST1	N.S.
1.26472	-0.499353	4.24685	-0.117582	0.906399	0.999201	BST2	N.S.
0	NA	NA	NA	NA	NA	BSX	N.S.
1785.47	-0.450341	0.288644	-1.56019	0.118714	0.998563	BTAF1	N.S.
6321.98	-0.0928381	0.203219	-0.456837	0.647788	0.998563	BTBD1	N.S.
2765.1	0.133041	0.2194	0.606386	0.544258	0.998563	BTBD10	N.S.
0.243081	-1.37948	4.99696	-0.276065	0.782498	0.998563	BTBD11	N.S.
4.12678	2.19179	2.61646	0.837691	0.402204	0.998563	BTBD16	N.S.
0	NA	NA	NA	NA	NA	BTBD17	N.S.
3.73792	-0.162015	2.69539	-0.0601081	0.95207	0.999201	BTBD18	N.S.
54.0923	-1.02418	0.759682	-1.34816	0.177605	0.998563	BTBD19	N.S.
9376.42	0.13538	0.205646	0.658317	0.510335	0.998563	BTBD2	N.S.
6634.77	-0.233622	0.242674	-0.962699	0.335699	0.998563	BTBD3	N.S.
4.03923	-5.41684	2.97161	-1.82287	0.0683237	0.998563	BTBD6	N.S.
2356.56	-0.338599	0.253576	-1.33529	0.18178	0.998563	BTBD7	N.S.
32.9333	-0.171802	0.948198	-0.181188	0.85622	0.998563	BTBD8	N.S.
1516.08	-0.188531	0.26445	-0.712916	0.475898	0.998563	BTBD9	N.S.
0	NA	NA	NA	NA	NA	BTC	N.S.
305.026	-0.030194	0.339218	-0.0890106	0.929073	0.999201	BTD	N.S.
19269.9	0.304618	0.206947	1.47197	0.14103	0.998563	BTF3	N.S.
3096.13	0.0759481	0.211936	0.358354	0.720078	0.998563	BTF3L4	N.S.
835.292	-0.250109	0.271016	-0.922856	0.356082	0.998563	BTG1	N.S.
[truncated: 17,900 more rows]

## Sheet: C. +BRG1; +DOX vs -DOX
baseMean	log2FoldChange	lfcSE	stat	pvalue	padj	Gene	Significance
779.627	0.0380174	0.226978	0.167494	0.866982	0.99919	A1BG	N.S.
0	NA	NA	NA	NA	NA	A1CF	N.S.
62.7282	2.12855	0.984221	2.16268	0.030566	0.392229	A2M	N.S.
28.2192	0.278376	1.21231	0.229624	0.818384	0.99919	A2ML1	N.S.
1.48464	0.147779	4.51407	0.0327375	0.973884	NA	A3GALT2	N.S.
1702.99	-0.0543255	0.18308	-0.296731	0.766672	0.99919	A4GALT	N.S.
0.525265	2.4306	4.88347	0.497719	0.618682	NA	A4GNT	N.S.
1879.15	-0.0477485	0.229207	-0.20832	0.834979	0.99919	AAAS	N.S.
2924.9	0.0626821	0.195511	0.320606	0.748509	0.99919	AACS	N.S.
0.757197	1.03454	4.8745	0.212235	0.831924	NA	AADAC	N.S.
0	NA	NA	NA	NA	NA	AADACL2	N.S.
0.525265	2.4306	4.88347	0.497719	0.618682	NA	AADACL3	N.S.
9.51138	0.375471	2.01917	0.185954	0.852481	0.99919	AADACL4	N.S.
704.404	-0.0388928	0.240978	-0.161396	0.871782	0.99919	AADAT	N.S.
1171.08	0.292756	0.198275	1.47652	0.139805	0.808838	AAED1	N.S.
3287.19	-0.113508	0.178996	-0.634136	0.525992	0.99919	AAGAB	N.S.
4539.1	-0.32253	0.170643	-1.89009	0.0587466	0.56058	AAK1	N.S.
602.514	-0.183902	0.240838	-0.763591	0.445111	0.99919	AAMDC	N.S.
6214.57	0.0573749	0.171382	0.334778	0.737792	0.99919	AAMP	N.S.
6.71772	-3.72382	2.16359	-1.72113	0.0852278	0.670777	AANAT	N.S.
1623.37	0.0800055	0.20631	0.387792	0.69817	0.99919	AAR2	N.S.
2.78089	-2.41377	2.95671	-0.81637	0.414288	NA	AARD	N.S.
6670.49	-0.0913399	0.278797	-0.327622	0.743198	0.99919	AARS	N.S.
1338.11	0.000283883	0.19193	0.00147909	0.99882	0.999362	AARS2	N.S.
1360.01	-0.0806237	0.205058	-0.393175	0.69419	0.99919	AARSD1	N.S.
577.156	0.076662	0.252792	0.303261	0.761691	0.99919	AASDH	N.S.
3023.33	0.104187	0.175775	0.592729	0.553363	0.99919	AASDHPPT	N.S.
115.519	-0.0988668	0.545034	-0.181396	0.856057	0.99919	AASS	N.S.
6279.77	-0.0473592	0.212292	-0.223085	0.823469	0.99919	AATF	N.S.
1553.2	-0.0158521	0.233776	-0.0678089	0.945938	0.99919	AATK	N.S.
845.822	0.334965	0.214038	1.56498	0.117588	0.761743	ABAT	N.S.
122.657	0.456607	0.687498	0.664157	0.50659	0.99919	ABC7-42404400C24.1	N.S.
94.9293	-0.879377	0.624469	-1.4082	0.159072	0.843102	ABCA1	N.S.
0	NA	NA	NA	NA	NA	ABCA10	N.S.
60.9188	-3.99318	0.748865	-5.3323	9.69748e-08	1.26642e-05	ABCA12	padj<0.05 & Downregulated
0	NA	NA	NA	NA	NA	ABCA13	N.S.
6790.06	0.0744463	0.279371	0.266478	0.789871	0.99919	ABCA2	N.S.
13904.1	0.0128908	0.19116	0.0674346	0.946236	0.99919	ABCA3	N.S.
51.8511	-3.41097	0.840388	-4.0588	4.93248e-05	0.00309739	ABCA4	padj<0.05 & Downregulated
79.478	-0.639346	0.585404	-1.09215	0.274769	0.954938	ABCA5	N.S.
0.262632	1.40389	4.98093	0.281853	0.778056	NA	ABCA6	N.S.
2153.32	-0.0633963	0.755205	-0.0839458	0.9331	0.99919	ABCA7	N.S.
2.41936	-1.23231	3.77115	-0.326773	0.74384	NA	ABCA8	N.S.
0	NA	NA	NA	NA	NA	ABCA9	N.S.
9.96255	-2.62025	1.64786	-1.59009	0.111814	0.748879	ABCB1	N.S.
3150.32	0.0879492	0.251654	0.349484	0.726726	0.99919	ABCB10	N.S.
0	NA	NA	NA	NA	NA	ABCB11	N.S.
0.890748	-3.33689	4.84931	-0.688116	0.49138	NA	ABCB4	N.S.
1.1616	-3.73749	4.83375	-0.773207	0.4394	NA	ABCB5	N.S.
136.973	0.177389	0.47676	0.372073	0.709839	0.99919	ABCB6	N.S.
1064.28	0.310002	0.232436	1.33371	0.182299	0.886014	ABCB7	N.S.
1221.54	0.178673	0.201701	0.885829	0.375709	0.99919	ABCB8	N.S.
1046.14	0.213823	0.222323	0.961767	0.336167	0.987365	ABCB9	N.S.
7624.5	-0.116005	0.157164	-0.738116	0.460444	0.99919	ABCC1	N.S.
2053.63	-0.178565	0.183996	-0.970483	0.331806	0.987004	ABCC10	N.S.
42.9075	1.408	0.903035	1.55919	0.118951	0.764436	ABCC11	N.S.
0.464642	-2.42569	4.90538	-0.494495	0.620957	NA	ABCC12	N.S.
19.5196	-0.315606	1.06359	-0.296736	0.766668	0.99919	ABCC2	N.S.
48.2867	-2.41244	0.717689	-3.3614	0.000775491	0.0289456	ABCC3	padj<0.05 & Downregulated
2796.38	0.0257225	0.178118	0.144413	0.885175	0.99919	ABCC4	N.S.
5086.75	0.0544982	0.165555	0.329186	0.742015	0.99919	ABCC5	N.S.
18.4438	-1.42111	1.11881	-1.2702	0.204014	0.904192	ABCC6	N.S.
279.602	-0.287565	0.328544	-0.875271	0.381427	0.99919	ABCC8	N.S.
0.21562	1.26002	4.99034	0.252492	0.800661	NA	ABCC9	N.S.
5078.76	0.037778	0.163963	0.230406	0.817777	0.99919	ABCD1	N.S.
440.096	-2.18374	0.318	-6.86712	6.55122e-12	1.85916e-09	ABCD2	padj<0.05 & Downregulated
3276.26	0.0387253	0.170855	0.226656	0.820691	0.99919	ABCD3	N.S.
2267.34	0.0853089	0.190725	0.447288	0.654667	0.99919	ABCD4	N.S.
5435.31	0.052238	0.154242	0.338676	0.734854	0.99919	ABCE1	N.S.
12033.4	0.195212	0.170592	1.14432	0.252491	0.941763	ABCF1	N.S.
5641.83	0.0391752	0.200011	0.195866	0.844715	0.99919	ABCF2	N.S.
4578.52	0.241875	0.172818	1.39959	0.161635	0.846807	ABCF3	N.S.
60.645	-0.645397	0.6175	-1.04518	0.295941	0.964481	ABCG1	N.S.
54.0288	-1.17804	0.706178	-1.66819	0.0952781	0.697776	ABCG2	N.S.
410.98	0.234994	0.360892	0.651147	0.514951	0.99919	ABCG4	N.S.
0.21562	1.26002	4.99034	0.252492	0.800661	NA	ABCG5	N.S.
0.862482	3.16539	4.84433	0.653422	0.513484	NA	ABCG8	N.S.
69.8584	0.261906	0.600076	0.436454	0.662507	0.99919	ABHD1	N.S.
995.381	0.380648	0.211382	1.80076	0.0717407	0.620341	ABHD10	N.S.
613.967	0.0320603	0.248397	0.129069	0.897303	0.99919	ABHD11	N.S.
3949.67	-0.321122	0.168909	-1.90115	0.0572819	0.552659	ABHD12	N.S.
5.43068	1.8009	1.99366	0.903311	0.366361	0.99919	ABHD12B	N.S.
1206.6	0.0432245	0.211074	0.204784	0.837741	0.99919	ABHD13	N.S.
773.859	0.0168752	0.231222	0.0729825	0.94182	0.99919	ABHD14A	N.S.
63.197	1.04067	0.654526	1.58996	0.111844	0.748879	ABHD14A-ACY1	N.S.
4291.9	-0.000695279	0.235896	-0.00294739	0.997648	0.999292	ABHD14B	N.S.
4032.45	0.111069	0.161571	0.687434	0.491809	0.99919	ABHD15	N.S.
1719.9	-0.276245	0.178752	-1.54541	0.122247	0.767582	ABHD16A	N.S.
82.4387	-0.511093	1.14902	-0.444806	0.65646	0.99919	ABHD16B	N.S.
7712.44	-0.0360509	0.164075	-0.219722	0.826088	0.99919	ABHD17A	N.S.
1267.06	-0.0510933	0.216709	-0.235769	0.813612	0.99919	ABHD17B	N.S.
678.197	0.185338	0.24698	0.750416	0.453004	0.99919	ABHD17C	N.S.
666.227	0.0832264	0.283162	0.293918	0.768821	0.99919	ABHD18	N.S.
2212.05	-0.2523	0.183439	-1.37539	0.169011	0.861816	ABHD2	N.S.
666.789	0.0568474	0.251262	0.226248	0.821009	0.99919	ABHD3	N.S.
35.8531	-0.162926	0.926327	-0.175884	0.860385	0.99919	ABHD4	N.S.
678.436	-0.257998	0.301121	-0.856794	0.391559	0.99919	ABHD5	N.S.
684.215	0.0653788	0.228303	0.286368	0.774596	0.99919	ABHD6	N.S.
3289.14	0.250166	0.202621	1.23465	0.216962	0.914582	ABHD8	N.S.
3659.22	-0.139371	0.174906	-0.796835	0.425547	0.99919	ABI1	N.S.
5092.44	0.0270357	0.275734	0.0980501	0.921892	0.99919	ABI2	N.S.
8.92747	1.02802	1.59366	0.645069	0.518883	0.99919	ABI3	N.S.
9.51979	-0.343478	1.62781	-0.211007	0.832882	0.99919	ABI3BP	N.S.
6776.21	-0.319718	0.176301	-1.81347	0.0697586	0.610574	ABL1	N.S.
3519.3	-0.281602	0.169169	-1.66462	0.0959892	0.700388	ABL2	N.S.
904.439	-0.895581	0.275888	-3.24618	0.00116966	0.040048	ABLIM1	padj<0.05 & Downregulated
522.336	0.175255	0.261054	0.671335	0.502007	0.99919	ABLIM2	N.S.
127.24	0.481216	0.494819	0.97251	0.330797	0.987004	ABLIM3	N.S.
2.28128	0.369623	3.85873	0.0957888	0.923688	NA	ABO	N.S.
4343.24	-0.327771	0.184872	-1.77296	0.076235	0.636672	ABR	N.S.
0.431241	2.17199	4.9026	0.443027	0.657746	NA	ABRA	N.S.
1933.28	-0.174159	0.204352	-0.85225	0.394075	0.99919	ABRACL	N.S.
2583.19	0.150402	0.197726	0.760659	0.446861	0.99919	ABT1	N.S.
1169.69	-0.321751	0.281464	-1.14313	0.252983	0.941808	ABTB1	N.S.
1598.49	-0.70335	0.22361	-3.14544	0.0016584	0.0528573	ABTB2	N.S.
19.9601	7.69004	4.78734	1.60633	0.108202	0.736842	AC002310.11	N.S.
0	NA	NA	NA	NA	NA	AC002310.13	N.S.
108.243	-0.269556	0.583802	-0.461725	0.644279	0.99919	AC002398.9	N.S.
1.91303	4.30678	3.95477	1.08901	0.27615	NA	AC002985.3	N.S.
0	NA	NA	NA	NA	NA	AC003002.4	N.S.
3.7502	0.152661	3.24972	0.0469768	0.962532	NA	AC003002.6	N.S.
0	NA	NA	NA	NA	NA	AC003005.4	N.S.
0	NA	NA	NA	NA	NA	AC003006.7	N.S.
0	NA	NA	NA	NA	NA	AC004076.7	N.S.
5.94544	2.0486	2.25792	0.907293	0.364252	0.99919	AC004076.9	N.S.
0	NA	NA	NA	NA	NA	AC004158.1	N.S.
1.18766	-3.75431	4.83318	-0.776778	0.43729	NA	AC004231.7	N.S.
171.549	-0.0171183	0.38712	-0.0442196	0.964729	0.99919	AC004381.6	N.S.
2.46886	2.05835	3.14412	0.654668	0.512682	NA	AC004556.1	N.S.
36.0861	0.288626	0.880222	0.327902	0.742986	0.99919	AC004754.3	N.S.
0	NA	NA	NA	NA	NA	AC004813.1	N.S.
0	NA	NA	NA	NA	NA	AC004824.2	N.S.
0	NA	NA	NA	NA	NA	AC004824.3	N.S.
0	NA	NA	NA	NA	NA	AC004853.1	N.S.
0	NA	NA	NA	NA	NA	AC004953.1	N.S.
0	NA	NA	NA	NA	NA	AC005042.1	N.S.
0	NA	NA	NA	NA	NA	AC005477.1	N.S.
0	NA	NA	NA	NA	NA	AC005480.1	N.S.
0	NA	NA	NA	NA	NA	AC005779.2	N.S.
10.8654	-2.57821	2.03167	-1.26901	0.204436	0.904608	AC005943.2	N.S.
1.45694	0.568569	4.5558	0.124801	0.900681	NA	AC006026.2	N.S.
0	NA	NA	NA	NA	NA	AC006328.4	N.S.
0	NA	NA	NA	NA	NA	AC006386.1	N.S.
0	NA	NA	NA	NA	NA	AC006445.1	N.S.
68.9573	-0.281689	0.593103	-0.474941	0.634829	0.99919	AC006449.1	N.S.
68.9573	-0.281689	0.593103	-0.474941	0.634829	0.99919	AC006449.2	N.S.
3.5335	-1.60872	3.33363	-0.482571	0.6294	NA	AC006486.9	N.S.
0	NA	NA	NA	NA	NA	AC006538.4	N.S.
0	NA	NA	NA	NA	NA	AC006994.3	N.S.
147.449	1.05413	0.518622	2.03257	0.0420964	0.474573	AC007040.11	N.S.
0	NA	NA	NA	NA	NA	AC007163.2	N.S.
25.5348	-8.18763	4.787	-1.71039	0.0871939	0.677221	AC007192.4	N.S.
0	NA	NA	NA	NA	NA	AC007325.1	N.S.
690.709	0.030707	0.242432	0.126662	0.899208	0.99919	AC007325.2	N.S.
1846.47	0.265136	0.17954	1.47675	0.139742	0.808838	AC007325.4	N.S.
0	NA	NA	NA	NA	NA	AC007326.1	N.S.
0	NA	NA	NA	NA	NA	AC007557.5	N.S.
4.31011	2.09007	2.24357	0.93158	0.351553	0.996107	AC007906.1	N.S.
1.39393	-3.9993	4.82565	-0.828758	0.407241	NA	AC008074.1	N.S.
84.9995	0.29627	3.02295	0.0980066	0.921927	0.99919	AC008522.1	N.S.
0	NA	NA	NA	NA	NA	AC008622.1	N.S.
0	NA	NA	NA	NA	NA	AC008641.1	N.S.
0	NA	NA	NA	NA	NA	AC008686.1	N.S.
0	NA	NA	NA	NA	NA	AC008759.1	N.S.
0.431241	2.17199	4.9026	0.443027	0.657746	NA	AC008810.1	N.S.
0	NA	NA	NA	NA	NA	AC008914.1	N.S.
0.262632	1.40389	4.98093	0.281853	0.778056	NA	AC009022.1	N.S.
0	NA	NA	NA	NA	NA	AC009060.2	N.S.
0	NA	NA	NA	NA	NA	AC009060.3	N.S.
0	NA	NA	NA	NA	NA	AC009065.4	N.S.
0	NA	NA	NA	NA	NA	AC009121.2	N.S.
330.628	0.468003	0.414579	1.12886	0.258956	0.943752	AC009133.22	N.S.
0	NA	NA	NA	NA	NA	AC009133.23	N.S.
25.3283	-1.44725	1.24716	-1.16044	0.245872	0.938347	AC009336.19	N.S.
0	NA	NA	NA	NA	NA	AC009491.1	N.S.
0	NA	NA	NA	NA	NA	AC009491.2	N.S.
0	NA	NA	NA	NA	NA	AC009758.1	N.S.
339.696	-0.577885	0.352783	-1.63808	0.101406	0.719099	AC009950.1	N.S.
0	NA	NA	NA	NA	NA	AC009977.1	N.S.
0	NA	NA	NA	NA	NA	AC010184.1	N.S.
0.296916	-1.71441	4.9772	-0.344453	0.730506	NA	AC010287.1	N.S.
0	NA	NA	NA	NA	NA	AC010412.1	N.S.
106.558	-0.492973	0.517992	-0.951699	0.34125	0.991906	AC010547.9	N.S.
125.318	0.0745374	0.583066	0.127837	0.898278	0.99919	AC010642.1	N.S.
0	NA	NA	NA	NA	NA	AC010646.3	N.S.
0	NA	NA	NA	NA	NA	AC010655.1	N.S.
37.3518	-0.0437679	0.813909	-0.053775	0.957114	0.99919	AC011043.1	N.S.
0.262643	1.40393	4.98093	0.281861	0.77805	NA	AC011043.2	N.S.
0	NA	NA	NA	NA	NA	AC011155.1	N.S.
0	NA	NA	NA	NA	NA	AC011295.1	N.S.
0	NA	NA	NA	NA	NA	AC011380.1	N.S.
0	NA	NA	NA	NA	NA	AC011513.3	N.S.
0	NA	NA	NA	NA	NA	AC011530.4	N.S.
0.262643	1.40393	4.98093	0.281861	0.77805	NA	AC011841.1	N.S.
0.464642	-2.42569	4.90538	-0.494495	0.620957	NA	AC012005.3	N.S.
0	NA	NA	NA	NA	NA	AC012005.4	N.S.
3614.09	0.231617	0.179732	1.28868	0.197508	0.900131	AC012314.2	N.S.
3612.91	0.232643	0.180011	1.29238	0.196224	0.898017	AC012314.3	N.S.
3613.2	0.232386	0.179941	1.29146	0.196544	0.898017	AC012314.5	N.S.
3614.33	0.231414	0.179776	1.28724	0.198012	0.900131	AC012314.6	N.S.
3613.2	0.232386	0.179941	1.29146	0.196544	0.898017	AC012314.7	N.S.
3613.2	0.232387	0.179941	1.29146	0.196544	0.898017	AC012314.9	N.S.
0	NA	NA	NA	NA	NA	AC012363.2	N.S.
0	NA	NA	NA	NA	NA	AC013269.5	N.S.
0	NA	NA	NA	NA	NA	AC013286.1	N.S.
3008.56	0.110574	0.18021	0.613583	0.539491	0.99919	AC013461.1	N.S.
0.262632	1.40389	4.98093	0.281853	0.778056	NA	AC015688.3	N.S.
0	NA	NA	NA	NA	NA	AC016142.1	N.S.
0.296916	-1.71441	4.9772	-0.344453	0.730506	NA	AC016549.1	N.S.
0	NA	NA	NA	NA	NA	AC016577.1	N.S.
0	NA	NA	NA	NA	NA	AC016734.1	N.S.
0	NA	NA	NA	NA	NA	AC016753.2	N.S.
0	NA	NA	NA	NA	NA	AC017028.10	N.S.
2.45761	2.93865	3.85116	0.763055	0.445431	NA	AC017081.1	N.S.
0	NA	NA	NA	NA	NA	AC018512.1	N.S.
0.262632	1.40389	4.98093	0.281853	0.778056	NA	AC018755.18	N.S.
0	NA	NA	NA	NA	NA	AC018867.1	N.S.
0	NA	NA	NA	NA	NA	AC018902.1	N.S.
0	NA	NA	NA	NA	NA	AC019206.1	N.S.
3.96281	-0.636498	2.37775	-0.26769	0.788938	NA	AC021106.1	N.S.
0	NA	NA	NA	NA	NA	AC022016.1	N.S.
0	NA	NA	NA	NA	NA	AC022210.1	N.S.
0	NA	NA	NA	NA	NA	AC022405.1	N.S.
0	NA	NA	NA	NA	NA	AC022819.2	N.S.
0	NA	NA	NA	NA	NA	AC023491.2	N.S.
0	NA	NA	NA	NA	NA	AC024060.1	N.S.
0	NA	NA	NA	NA	NA	AC024361.1	N.S.
176.338	0.323003	0.389516	0.829242	0.406967	0.99919	AC024592.12	N.S.
0	NA	NA	NA	NA	NA	AC025263.3	N.S.
1.38225	0.421994	4.6657	0.090446	0.927933	NA	AC026248.1	N.S.
1.1284	-0.692949	4.76835	-0.145323	0.884456	NA	AC026369.1	N.S.
0	NA	NA	NA	NA	NA	AC026449.1	N.S.
13.1511	-0.818128	1.45215	-0.563392	0.573168	0.99919	AC037459.4	N.S.
0	NA	NA	NA	NA	NA	AC037482.2	N.S.
0	NA	NA	NA	NA	NA	AC044810.2	N.S.
0	NA	NA	NA	NA	NA	AC055733.1	N.S.
0	NA	NA	NA	NA	NA	AC055866.1	N.S.
0	NA	NA	NA	NA	NA	AC063956.1	N.S.
0	NA	NA	NA	NA	NA	AC063956.2	N.S.
0	NA	NA	NA	NA	NA	AC064829.1	N.S.
0	NA	NA	NA	NA	NA	AC066615.1	N.S.
30.4986	0.487328	0.931593	0.523113	0.600896	0.99919	AC068533.7	N.S.
0	NA	NA	NA	NA	NA	AC069063.1	N.S.
0	NA	NA	NA	NA	NA	AC069063.2	N.S.
0.646861	2.75264	4.86389	0.565934	0.571439	NA	AC069368.3	N.S.
0	NA	NA	NA	NA	NA	AC069499.1	N.S.
0	NA	NA	NA	NA	NA	AC073072.1	N.S.
0	NA	NA	NA	NA	NA	AC073130.2	N.S.
3.16143	1.37688	2.89779	0.475147	0.634682	NA	AC073333.1	N.S.
0	NA	NA	NA	NA	NA	AC073610.5	N.S.
0	NA	NA	NA	NA	NA	AC073657.1	N.S.
0	NA	NA	NA	NA	NA	AC074033.1	N.S.
0	NA	NA	NA	NA	NA	AC079355.1	N.S.
0	NA	NA	NA	NA	NA	AC079907.1	N.S.
30.533	-0.0314701	4.5696	-0.00688683	0.994505	0.999292	AC084219.2	N.S.
0	NA	NA	NA	NA	NA	AC087350.1	N.S.
0	NA	NA	NA	NA	NA	AC087392.1	N.S.
0	NA	NA	NA	NA	NA	AC087651.1	N.S.
0	NA	NA	NA	NA	NA	AC087651.2	N.S.
0	NA	NA	NA	NA	NA	AC087762.1	N.S.
0	NA	NA	NA	NA	NA	AC090154.1	N.S.
10164.4	0.0294179	0.163484	0.179943	0.857197	0.99919	AC090498.1	N.S.
0	NA	NA	NA	NA	NA	AC090958.1	N.S.
0	NA	NA	NA	NA	NA	AC091180.1	N.S.
0	NA	NA	NA	NA	NA	AC091304.2	N.S.
0	NA	NA	NA	NA	NA	AC092159.1	N.S.
0	NA	NA	NA	NA	NA	AC092384.1	N.S.
0.232321	-1.53534	4.98862	-0.307769	0.758258	NA	AC092718.1	N.S.
79.2545	-0.33639	0.547634	-0.61426	0.539043	0.99919	AC092835.2	N.S.
0.21562	1.26002	4.99034	0.252492	0.800661	NA	AC092881.1	N.S.
0	NA	NA	NA	NA	NA	AC100821.2	N.S.
0.431241	2.17199	4.9026	0.443027	0.657746	NA	AC104057.1	N.S.
0	NA	NA	NA	NA	NA	AC104073.2	N.S.
0	NA	NA	NA	NA	NA	AC104389.1	N.S.
0	NA	NA	NA	NA	NA	AC104389.2	N.S.
1.87761	2.68261	3.50641	0.765058	0.444237	NA	AC104532.2	N.S.
0.525265	2.4306	4.88347	0.497719	0.618682	NA	AC104534.3	N.S.
0	NA	NA	NA	NA	NA	AC104581.1	N.S.
0	NA	NA	NA	NA	NA	AC104650.2	N.S.
0	NA	NA	NA	NA	NA	AC104981.1	N.S.
0	NA	NA	NA	NA	NA	AC105009.1	N.S.
1.17215	3.60115	4.82887	0.745755	0.455815	NA	AC105052.2	N.S.
0	NA	NA	NA	NA	NA	AC107081.1	N.S.
0	NA	NA	NA	NA	NA	AC108925.1	N.S.
2.68144	4.7975	3.52593	1.36063	0.173629	NA	AC108938.5	N.S.
0	NA	NA	NA	NA	NA	AC109344.1	N.S.
1.69726	-2.6675	4.37603	-0.60957	0.542147	NA	AC109486.1	N.S.
0	NA	NA	NA	NA	NA	AC109829.1	N.S.
0	NA	NA	NA	NA	NA	AC109829.2	N.S.
0	NA	NA	NA	NA	NA	AC110602.1	N.S.
0	NA	NA	NA	NA	NA	AC110615.1	N.S.
0	NA	NA	NA	NA	NA	AC112719.2	N.S.
140.086	0.066393	0.44914	0.147823	0.882483	0.99919	AC113404.1	N.S.
0	NA	NA	NA	NA	NA	AC118758.1	N.S.
0	NA	NA	NA	NA	NA	AC123512.1	N.S.
0	NA	NA	NA	NA	NA	AC123512.2	N.S.
0	NA	NA	NA	NA	NA	AC123512.3	N.S.
0	NA	NA	NA	NA	NA	AC124312.1	N.S.
0	NA	NA	NA	NA	NA	AC126407.1	N.S.
106.869	0.0857374	0.58128	0.147498	0.882739	0.99919	AC129492.1	N.S.
21.1536	-2.33987	1.11169	-2.10478	0.0353109	0.428126	AC130310.1	N.S.
0	NA	NA	NA	NA	NA	AC131263.1	N.S.
4.52803	5.55321	3.5752	1.55326	0.120361	0.767077	AC133551.1	N.S.
0	NA	NA	NA	NA	NA	AC136352.4	N.S.
0	NA	NA	NA	NA	NA	AC136352.5	N.S.
79.5247	0.01449	0.56281	0.0257458	0.97946	0.99919	AC136612.1	N.S.
1094.2	-0.376545	0.313408	-1.20145	0.229576	0.927163	AC136616.1	N.S.
0	NA	NA	NA	NA	NA	AC136616.2	N.S.
0	NA	NA	NA	NA	NA	AC136616.3	N.S.
0	NA	NA	NA	NA	NA	AC138028.1	N.S.
2440.92	-0.65676	0.252992	-2.59597	0.00943239	0.1912	AC138969.4	N.S.
0	NA	NA	NA	NA	NA	AC141272.1	N.S.
0	NA	NA	NA	NA	NA	AC142525.1	N.S.
694.472	0.000613852	0.31191	0.00196804	0.99843	0.999292	AC145212.2	N.S.
346.529	0.474638	0.317664	1.49415	0.135136	0.798347	AC145212.4	N.S.
90.9241	-0.505575	0.537889	-0.939924	0.347257	0.993517	AC156455.2	N.S.
0	NA	NA	NA	NA	NA	AC171558.1	N.S.
0	NA	NA	NA	NA	NA	AC171558.2	N.S.
0	NA	NA	NA	NA	NA	AC208162.1	N.S.
0	NA	NA	NA	NA	NA	AC213203.1	N.S.
0	NA	NA	NA	NA	NA	AC231657.1	N.S.
0	NA	NA	NA	NA	NA	AC233755.1	N.S.
0	NA	NA	NA	NA	NA	AC233755.2	N.S.
0.431241	2.17199	4.9026	0.443027	0.657746	NA	AC234582.1	N.S.
0.512697	-0.316345	4.9698	-0.0636534	0.949246	NA	AC234582.2	N.S.
0	NA	NA	NA	NA	NA	AC236040.1	N.S.
1902.38	-0.191554	0.19767	-0.96906	0.332515	0.987004	AC240274.1	N.S.
3.84805	-1.77584	2.62797	-0.675748	0.499201	NA	AC241377.2	N.S.
306.624	0.155349	0.309664	0.501669	0.6159	0.99919	AC241585.2	N.S.
0	NA	NA	NA	NA	NA	AC242988.1	N.S.
10.215	0.299657	1.42304	0.210575	0.833219	0.99919	AC243687.1	N.S.
0	NA	NA	NA	NA	NA	AC243756.1	N.S.
0	NA	NA	NA	NA	NA	AC243790.2	N.S.
0	NA	NA	NA	NA	NA	AC243945.1	N.S.
0	NA	NA	NA	NA	NA	AC245015.1	N.S.
311.674	0.0808404	0.326545	0.247563	0.804472	0.99919	AC245100.1	N.S.
115.869	0.232141	0.473718	0.49004	0.624106	0.99919	AC253572.1	N.S.
3.01869	4.96849	4.09298	1.21391	0.224783	NA	AC254560.1	N.S.
1.1616	-3.73749	4.83375	-0.773207	0.4394	NA	AC254788.1	N.S.
0	NA	NA	NA	NA	NA	AC254847.1	N.S.
0	NA	NA	NA	NA	NA	AC254944.3	N.S.
0	NA	NA	NA	NA	NA	AC254995.1	N.S.
2361.58	0.146891	0.181252	0.810426	0.417695	0.99919	ACAA1	N.S.
3224.36	0.210509	0.179207	1.17467	0.240127	0.935749	ACAA2	N.S.
5879.9	0.0731361	0.168149	0.434947	0.663601	0.99919	ACACA	N.S.
974.194	-0.155408	0.287135	-0.541238	0.588344	0.99919	ACACB	N.S.
1667.05	0.147815	0.268321	0.550889	0.58171	0.99919	ACAD10	N.S.
1364.13	0.0659499	0.300548	0.219432	0.826314	0.99919	ACAD11	N.S.
1553.1	0.332661	0.194754	1.70811	0.087616	0.678481	ACAD8	N.S.
1481.37	0.0103464	0.194034	0.0533224	0.957475	0.99919	ACAD9	N.S.
0	NA	NA	NA	NA	NA	ACADL	N.S.
1968.59	0.386208	0.284888	1.35565	0.175211	0.875602	ACADM	N.S.
335.666	-0.129739	0.382989	-0.338753	0.734796	0.99919	ACADS	N.S.
1022.38	0.128198	0.203127	0.63112	0.527962	0.99919	ACADSB	N.S.
8560.9	-0.365193	0.312377	-1.16908	0.242373	0.93625	ACADVL	N.S.
23.3943	1.91215	1.47981	1.29216	0.196301	0.898017	ACAN	N.S.
128.5	0.961297	0.632524	1.51978	0.128566	0.784114	ACAP1	N.S.
4091.13	-0.0697693	0.186991	-0.373116	0.709062	0.99919	ACAP2	N.S.
6608.76	0.126639	0.693956	0.182489	0.855199	0.99919	ACAP3	N.S.
2989.33	0.0955434	0.255229	0.374344	0.708149	0.99919	ACAT1	N.S.
1018.57	0.499748	0.259583	1.92519	0.0542055	0.540846	ACAT2	N.S.
10493.6	-0.185242	0.149594	-1.23829	0.215607	0.914023	ACBD3	N.S.
815.551	-0.0944968	0.321526	-0.293901	0.768834	0.99919	ACBD4	N.S.
2412.08	0.293866	0.185131	1.58734	0.112436	0.74946	ACBD5	N.S.
2867.06	0.251436	0.166333	1.51164	0.130625	0.789653	ACBD6	N.S.
72.1778	1.0277	0.577372	1.77996	0.0750818	0.633133	ACBD7	N.S.
486.476	0.0714388	0.46477	0.153708	0.87784	0.99919	ACCS	N.S.
0	NA	NA	NA	NA	NA	ACCSL	N.S.
1114.35	0.307364	0.200728	1.53125	0.125709	0.776185	ACD	N.S.
11.7665	-1.10073	1.36269	-0.80776	0.419229	0.99919	ACE	N.S.
3.42658	-0.528233	2.34192	-0.225556	0.821547	NA	ACE2	N.S.
0.512524	-0.311736	4.97004	-0.0627231	0.949987	NA	ACER1	N.S.
338.253	-0.171212	0.296239	-0.577952	0.563297	0.99919	ACER2	N.S.
1701.55	-0.0386685	0.211347	-0.182962	0.854828	0.99919	ACER3	N.S.
1005.77	-0.881075	0.29592	-2.97741	0.00290695	0.0806351	ACHE	N.S.
9127.36	0.0488205	0.187552	0.260304	0.794629	0.99919	ACIN1	N.S.
0.296916	-1.71441	4.9772	-0.344453	0.730506	NA	ACKR1	N.S.
40.817	0.169864	0.83647	0.203072	0.839079	0.99919	ACKR2	N.S.
45.06	-0.424815	0.731758	-0.58054	0.56155	0.99919	ACKR3	N.S.
7.04522	1.63774	1.81878	0.900462	0.367874	0.99919	ACKR4	N.S.
27209.5	-0.00618146	0.143031	-0.0432177	0.965528	0.99919	ACLY	N.S.
0	NA	NA	NA	NA	NA	ACMSD	N.S.
2533.62	0.426262	0.215537	1.97767	0.0479656	0.507698	ACO1	N.S.
10140.4	0.195709	0.165912	1.1796	0.238161	0.935489	ACO2	N.S.
214.681	0.297084	0.354237	0.838658	0.401661	0.99919	ACOT1	N.S.
610.828	-0.000644282	0.273319	-0.00235725	0.998119	0.999292	ACOT11	N.S.
1.45565	-0.136515	3.31683	-0.0411584	0.96717	NA	ACOT12	N.S.
1951.63	-0.0805632	0.183807	-0.438303	0.661167	0.99919	ACOT13	N.S.
3020.52	0.240634	0.183758	1.30951	0.190361	0.894721	ACOT2	N.S.
8.00815	1.41623	1.8608	0.761089	0.446604	0.99919	ACOT4	N.S.
0.232321	-1.53534	4.98862	-0.307769	0.758258	NA	ACOT6	N.S.
5473.8	-0.116783	0.152813	-0.764226	0.444733	0.99919	ACOT7	N.S.
714.059	0.404747	0.251826	1.60725	0.108	0.736483	ACOT8	N.S.
2090.56	-0.401087	0.225502	-1.77864	0.0752987	0.634306	ACOT9	N.S.
3509.43	-0.123205	0.160748	-0.766448	0.44341	0.99919	ACOX1	N.S.
172.951	0.571871	0.436947	1.30879	0.190606	0.895216	ACOX2	N.S.
991.3	0.00575443	0.240862	0.023891	0.98094	0.99919	ACOX3	N.S.
7.04432	0.995328	2.24784	0.442793	0.657915	0.99919	ACOXL	N.S.
7233.18	0.154056	0.175218	0.879224	0.37928	0.99919	ACP1	N.S.
2047.15	0.162873	0.173925	0.936455	0.349039	0.994683	ACP2	N.S.
10.235	-0.251423	1.48051	-0.169822	0.86515	0.99919	ACP5	N.S.
1337.01	0.191662	0.193164	0.992223	0.321089	0.982032	ACP6	N.S.
0	NA	NA	NA	NA	NA	ACP7	N.S.
0.262632	1.40389	4.98093	0.281853	0.778056	NA	ACPP	N.S.
1.83843	4.24627	4.81301	0.88225	0.377642	NA	ACPT	N.S.
21.9154	-0.287917	1.16271	-0.247626	0.804424	0.99919	ACR	N.S.
25.0537	-0.309587	0.951634	-0.325322	0.744938	0.99919	ACRBP	N.S.
61.4997	-0.387434	0.775308	-0.499717	0.617274	0.99919	ACRC	N.S.
1.30961	2.0907	4.78678	0.436765	0.662282	NA	ACRV1	N.S.
2.97938	-1.27559	2.87392	-0.443851	0.65715	NA	ACSBG1	N.S.
0	NA	NA	NA	NA	NA	ACSBG2	N.S.
1379.77	0.297238	0.277144	1.0725	0.283494	0.960204	ACSF2	N.S.
1768.42	0.0423323	0.18684	0.22657	0.820758	0.99919	ACSF3	N.S.
2500.39	-0.00439895	0.16716	-0.0263158	0.979005	0.99919	ACSL1	N.S.
3966.39	-0.198691	0.182868	-1.08652	0.277247	0.955586	ACSL3	N.S.
1357.19	-0.326012	0.221851	-1.46951	0.141695	0.812072	ACSL4	N.S.
50.7171	-0.32705	0.711051	-0.459953	0.64555	0.99919	ACSL5	N.S.
92.3362	0.0355405	0.645128	0.0550906	0.956066	0.99919	ACSL6	N.S.
0.646861	2.75264	4.86389	0.565934	0.571439	NA	ACSM1	N.S.
0.21562	1.26002	4.99034	0.252492	0.800661	NA	ACSM2A	N.S.
0.21562	1.26002	4.99034	0.252492	0.800661	NA	ACSM2B	N.S.
2.46313	0.432679	3.23711	0.133662	0.89367	NA	ACSM3	N.S.
0	NA	NA	NA	NA	NA	ACSM4	N.S.
0	NA	NA	NA	NA	NA	ACSM5	N.S.
0.696963	-3.00521	4.86584	-0.617613	0.536831	NA	ACSM6	N.S.
0.262632	1.40389	4.98093	0.281853	0.778056	NA	ACSS1	N.S.
9492.73	-0.273251	0.313808	-0.870756	0.383887	0.99919	ACSS2	N.S.
2.2865	-0.232356	3.34403	-0.0694837	0.944605	NA	ACSS3	N.S.
25.3499	0.45242	0.963014	0.469796	0.638501	0.99919	ACTA1	N.S.
1954.78	-0.348081	0.182028	-1.91224	0.0558456	0.547948	ACTA2	N.S.
133341	-0.199362	0.166898	-1.19452	0.232276	0.931368	ACTB	N.S.
106.837	-7.24974	1.04549	-6.93429	4.08267e-12	1.20496e-09	ACTBL2	padj<0.05 & Downregulated
17.6247	6.56797	4.75664	1.3808	0.16734	0.85779	ACTC1	N.S.
213962	-0.185869	0.14791	-1.25664	0.208885	0.90876	ACTG1	N.S.
4.27848	-3.61374	3.15645	-1.14488	0.252261	0.941763	ACTG2	N.S.
8.53667	2.25273	1.67918	1.34157	0.179737	0.881315	ACTL10	N.S.
2036.51	-0.0240256	0.190435	-0.126162	0.899604	0.99919	ACTL6A	N.S.
6.36507	-0.253976	2.08915	-0.121569	0.90324	0.99919	ACTL6B	N.S.
0	NA	NA	NA	NA	NA	ACTL7A	N.S.
2.34924	-4.7459	3.6469	-1.30135	0.193138	NA	ACTL7B	N.S.
1.00354	3.37283	4.83639	0.697385	0.485562	NA	ACTL8	N.S.
0	NA	NA	NA	NA	NA	ACTL9	N.S.
14336.5	-0.251132	0.144015	-1.74379	0.0811956	0.65691	ACTN1	N.S.
26.571	0.0351167	1.15089	0.0305126	0.975658	0.99919	ACTN2	N.S.
8.04276	-2.61473	2.02191	-1.2932	0.195942	0.898017	ACTN3	N.S.
20314.6	-0.47385	0.144021	-3.29014	0.00100139	0.0354376	ACTN4	padj<0.05 & Downregulated
4080.21	-0.0480666	0.168907	-0.284574	0.77597	0.99919	ACTR10	N.S.
9031.41	0.0177233	0.156748	0.113068	0.909976	0.99919	ACTR1A	N.S.
3313.81	-0.293465	0.207982	-1.41101	0.158242	0.842424	ACTR1B	N.S.
31768.3	-0.0104068	0.153572	-0.0677649	0.945973	0.99919	ACTR2	N.S.
14620.5	-0.13185	0.155339	-0.848788	0.395999	0.99919	ACTR3	N.S.
404.946	0.694493	0.302403	2.29658	0.0216426	0.322085	ACTR3B	N.S.
9.2881	-3.08271	2.51702	-1.22475	0.22067	0.915758	ACTR3C	N.S.
408.79	0.0656976	0.282937	0.232198	0.816384	0.99919	ACTR5	N.S.
1169.71	0.135639	0.203877	0.665298	0.50586	0.99919	ACTR6	N.S.
1565.69	0.201345	0.232592	0.865656	0.386679	0.99919	ACTR8	N.S.
0.431241	2.17199	4.9026	0.443027	0.657746	NA	ACTRT1	N.S.
0	NA	NA	NA	NA	NA	ACTRT2	N.S.
324.311	0.317647	0.300111	1.05843	0.289859	0.960718	ACTRT3	N.S.
1434.5	-0.307739	0.196614	-1.5652	0.117537	0.761743	ACVR1	N.S.
1805.62	0.0748978	0.19218	0.389729	0.696737	0.99919	ACVR1B	N.S.
55.0245	-0.574507	0.742175	-0.774085	0.438881	0.99919	ACVR1C	N.S.
1075.46	-0.127142	0.200636	-0.633697	0.526279	0.99919	ACVR2A	N.S.
709.812	-0.0770554	0.240435	-0.320483	0.748602	0.99919	ACVR2B	N.S.
65.3932	-2.0002	0.680132	-2.9409	0.00327264	0.0880667	ACVRL1	N.S.
1141.03	-0.0132209	0.297417	-0.0444524	0.964544	0.99919	ACY1	N.S.
0	NA	NA	NA	NA	NA	ACY3	N.S.
255.212	0.176908	0.356448	0.496309	0.619676	0.99919	ACYP1	N.S.
462.165	-0.148902	0.315048	-0.472631	0.636476	0.99919	ACYP2	N.S.
34.6575	0.831941	0.919314	0.904959	0.365487	0.99919	AD000671.6	N.S.
1105.73	-0.0480096	0.198169	-0.242267	0.808574	0.99919	ADA	N.S.
0	NA	NA	NA	NA	NA	ADAD1	N.S.
4.91377	-0.589764	2.03218	-0.290212	0.771654	0.99919	ADAD2	N.S.
198.701	0.476852	0.403729	1.18112	0.237556	0.935489	ADAL	N.S.
4445.15	-0.260101	0.173526	-1.49891	0.133896	0.798203	ADAM10	N.S.
1882.16	0.217043	0.746588	0.290714	0.77127	0.99919	ADAM11	N.S.
9.11568	-4.70367	2.3824	-1.97434	0.0483431	0.509936	ADAM12	N.S.
4789.25	-0.167412	0.163062	-1.02668	0.304573	0.969038	ADAM15	N.S.
4808.78	-0.237433	0.156859	-1.51366	0.130111	0.789091	ADAM17	N.S.
0	NA	NA	NA	NA	NA	ADAM18	N.S.
2411.66	-1.23425	0.233346	-5.28937	1.22739e-07	1.54809e-05	ADAM19	padj<0.05 & Downregulated
0	NA	NA	NA	NA	NA	ADAM2	N.S.
2.64223	-2.03817	3.0335	-0.671887	0.501655	NA	ADAM20	N.S.
14.8789	0.424217	1.32389	0.320433	0.74864	0.99919	ADAM21	N.S.
757.909	-0.256871	0.436156	-0.588943	0.5559	0.99919	ADAM22	N.S.
1805.04	-0.123207	0.260306	-0.473316	0.635988	0.99919	ADAM23	N.S.
0.21562	1.26002	4.99034	0.252492	0.800661	NA	ADAM28	N.S.
0.979014	3.33887	4.83745	0.690213	0.49006	NA	ADAM29	N.S.
0	NA	NA	NA	NA	NA	ADAM30	N.S.
8.18554	0.507246	1.72747	0.293636	0.769036	0.99919	ADAM32	N.S.
0.696963	-3.00521	4.86584	-0.617613	0.536831	NA	ADAM33	N.S.
0	NA	NA	NA	NA	NA	ADAM7	N.S.
222.052	0.324065	0.562454	0.576162	0.564506	0.99919	ADAM8	N.S.
6783.99	-0.214245	0.175542	-1.22048	0.222283	0.918576	ADAM9	N.S.
0.296916	-1.71441	4.9772	-0.344453	0.730506	NA	ADAMDEC1	N.S.
7936.23	-0.325404	0.297453	-1.09397	0.273969	0.954885	ADAMTS1	N.S.
529.751	-0.142213	0.344319	-0.413025	0.679588	0.99919	ADAMTS10	N.S.
6.09203	-3.44128	2.55041	-1.3493	0.177239	0.877478	ADAMTS12	N.S.
1229.38	-0.428209	0.343645	-1.24608	0.212734	0.91203	ADAMTS13	N.S.
129.237	-1.19141	0.545023	-2.18599	0.0288166	0.379007	ADAMTS14	N.S.
660.353	-0.0887408	0.318672	-0.27847	0.780651	0.99919	ADAMTS15	N.S.
2.1015	-4.58517	3.81187	-1.20287	0.229027	NA	ADAMTS16	N.S.
88.3273	-0.773081	0.58069	-1.33131	0.183086	0.88698	ADAMTS17	N.S.
0	NA	NA	NA	NA	NA	ADAMTS18	N.S.
0.262632	1.40389	4.98093	0.281853	0.778056	NA	ADAMTS19	N.S.
322.508	-0.687278	0.458621	-1.49858	0.133984	0.798203	ADAMTS2	N.S.
0	NA	NA	NA	NA	NA	ADAMTS20	N.S.
14.4004	-1.1504	1.49796	-0.767982	0.442498	0.99919	ADAMTS3	N.S.
18.575	-0.443703	1.10749	-0.400639	0.688686	0.99919	ADAMTS4	N.S.
12.4497	0.406592	1.46108	0.278281	0.780797	0.99919	ADAMTS5	N.S.
295.155	0.429308	0.366446	1.17154	0.24138	0.93625	ADAMTS6	N.S.
3581.02	-0.457775	0.306093	-1.49554	0.134773	0.798347	ADAMTS7	N.S.
127.512	1.50915	0.584552	2.58172	0.00983089	0.195255	ADAMTS8	N.S.
0	NA	NA	NA	NA	NA	ADAMTS9	N.S.
77.1374	-0.303094	0.598159	-0.506711	0.612357	0.99919	ADAMTSL1	N.S.
0	NA	NA	NA	NA	NA	ADAMTSL2	N.S.
3473.8	-0.344778	0.197413	-1.74648	0.0807276	0.654089	ADAMTSL3	N.S.
2776.97	-0.783448	0.295477	-2.65147	0.00801426	0.169194	ADAMTSL4	N.S.
1233.44	-0.634629	0.24098	-2.63353	0.00845023	0.175881	ADAMTSL5	N.S.
2142.12	-0.0198811	0.229775	-0.086524	0.93105	0.99919	ADAP1	N.S.
1817.29	-0.18926	0.192682	-0.982242	0.325981	0.986536	ADAP2	N.S.
40835.8	-0.435735	0.15282	-2.85129	0.00435416	0.108355	ADAR	N.S.
920.903	0.186907	0.234501	0.79704	0.425428	0.99919	ADARB1	N.S.
10.8371	4.48593	2.09605	2.14018	0.0323399	0.407202	ADARB2	N.S.
895.919	0.0729813	0.222817	0.327539	0.74326	0.99919	ADAT1	N.S.
292.487	0.0515874	0.405038	0.127364	0.898652	0.99919	ADAT2	N.S.
706.024	-0.00314833	0.229071	-0.0137439	0.989034	0.99919	ADAT3	N.S.
502.925	0.0983066	0.253261	0.388163	0.697895	0.99919	ADCK1	N.S.
2644.47	0.193124	0.199811	0.966532	0.333778	0.987264	ADCK2	N.S.
3535.34	0.108873	0.171076	0.6364	0.524516	0.99919	ADCK3	N.S.
1306.62	0.181094	0.285622	0.634034	0.526059	0.99919	ADCK4	N.S.
460.439	-0.0254244	0.330784	-0.0768609	0.938734	0.99919	ADCK5	N.S.
3126.38	-0.000454076	0.193637	-0.00234499	0.998129	0.999292	ADCY1	N.S.
3.88699	-3.08428	2.65847	-1.16017	0.24598	NA	ADCY10	N.S.
7.1561	4.82918	2.25969	2.1371	0.0325903	0.408958	ADCY2	N.S.
3170.22	-0.441	0.225188	-1.95837	0.0501872	0.521191	ADCY3	N.S.
0.547875	-0.843806	4.9442	-0.170666	0.864487	NA	ADCY4	N.S.
962.491	-0.546572	0.212319	-2.57429	0.0100445	0.198261	ADCY5	N.S.
4644.42	-0.000624371	0.203302	-0.00307116	0.99755	0.999292	ADCY6	N.S.
2539.98	-0.397199	0.324247	-1.22499	0.220579	0.915758	ADCY7	N.S.
0.296916	-1.71441	4.9772	-0.344453	0.730506	NA	ADCY8	N.S.
3110.63	-0.0764206	0.169166	-0.451749	0.65145	0.99919	ADCY9	N.S.
8.93321	2.30543	1.75725	1.31195	0.189536	0.894463	ADCYAP1	N.S.
120.96	0.440471	0.577405	0.762846	0.445555	0.99919	ADCYAP1R1	N.S.
16294.1	0.035718	0.145752	0.24506	0.80641	0.99919	ADD1	N.S.
6942.64	-0.307361	0.239158	-1.28518	0.198731	0.900144	ADD2	N.S.
3130.52	0.0273389	0.197215	0.138625	0.889747	0.99919	ADD3	N.S.
1.98173	-3.97879	4.1508	-0.958562	0.33778	NA	ADGB	N.S.
115.227	-0.390413	0.472663	-0.825987	0.408811	0.99919	ADGRA1	N.S.
1657.82	-0.0239471	0.195842	-0.122277	0.902679	0.99919	ADGRA2	N.S.
3276.83	0.0699089	0.199169	0.351003	0.725586	0.99919	ADGRA3	N.S.
2065.94	-0.187574	0.261355	-0.717699	0.472943	0.99919	ADGRB1	N.S.
2302.53	-0.287969	0.199994	-1.43988	0.1499	0.827914	ADGRB2	N.S.
21.6782	-1.13762	1.00404	-1.13304	0.257196	0.943299	ADGRB3	N.S.
20.6097	0.312737	1.22973	0.254314	0.799253	0.99919	ADGRD1	N.S.
0	NA	NA	NA	NA	NA	ADGRD2	N.S.
10.5944	-1.74308	1.54162	-1.13068	0.25819	0.943752	ADGRE1	N.S.
17.0349	0.0646157	1.23696	0.0522375	0.958339	0.99919	ADGRE2	N.S.
0	NA	NA	NA	NA	NA	ADGRE3	N.S.
5495.27	-0.00591735	0.161092	-0.0367327	0.970698	0.99919	ADGRE5	N.S.
0.296916	-1.71441	4.9772	-0.344453	0.730506	NA	ADGRF1	N.S.
2.16621	-3.16997	4.02372	-0.787822	0.430801	NA	ADGRF2	N.S.
6.89878	-1.8582	1.95869	-0.948697	0.342775	0.992803	ADGRF3	N.S.
21.5353	-5.51398	1.50991	-3.65186	0.000260346	0.0119686	ADGRF4	padj<0.05 & Downregulated
46.4633	-0.292083	0.713336	-0.409461	0.682202	0.99919	ADGRF5	N.S.
294.63	-0.110563	0.430777	-0.25666	0.797441	0.99919	ADGRG1	N.S.
38.4869	-0.692293	0.808624	-0.856137	0.391922	0.99919	ADGRG2	N.S.
1.58729	-4.17946	4.27276	-0.978163	0.327994	NA	ADGRG3	N.S.
0	NA	NA	NA	NA	NA	ADGRG4	N.S.
2.10449	-1.07005	3.49717	-0.305976	0.759623	NA	ADGRG5	N.S.
6404.91	-0.401986	0.240227	-1.67336	0.0942564	0.695471	ADGRG6	N.S.
0.787897	3.01934	4.85063	0.622463	0.533638	NA	ADGRG7	N.S.
6649.25	-0.294841	0.171002	-1.7242	0.0846724	0.668568	ADGRL1	N.S.
9754.35	0.0328962	0.218555	0.150517	0.880357	0.99919	ADGRL2	N.S.
26.5269	1.22104	1.12146	1.0888	0.276243	0.955586	ADGRL3	N.S.
1.82006	-4.37791	4.03961	-1.08375	0.278477	NA	ADGRL4	N.S.
2481.39	-0.139246	0.220936	-0.630253	0.528529	0.99919	ADGRV1	N.S.
0	NA	NA	NA	NA	NA	ADH1A	N.S.
0.593832	-2.7473	4.88154	-0.562794	0.573575	NA	ADH1B	N.S.
0	NA	NA	NA	NA	NA	ADH1C	N.S.
0	NA	NA	NA	NA	NA	ADH4	N.S.
6888.01	0.0406597	0.17047	0.238515	0.811482	0.99919	ADH5	N.S.
1.71778	-0.270791	4.27173	-0.0633915	0.949455	NA	ADH6	N.S.
0	NA	NA	NA	NA	NA	ADH7	N.S.
9.58856	1.72122	1.52511	1.12859	0.259072	0.943752	ADHFE1	N.S.
3039.41	-0.156708	0.186199	-0.841616	0.400003	0.99919	ADI1	N.S.
0	NA	NA	NA	NA	NA	ADIG	N.S.
0.232321	-1.53534	4.98862	-0.307769	0.758258	NA	ADIPOQ	N.S.
9500.69	0.274291	0.171584	1.59858	0.109914	0.742654	ADIPOR1	N.S.
5473.58	0.137841	0.209569	0.657736	0.510707	0.99919	ADIPOR2	N.S.
2.37155	0.945258	2.76752	0.341554	0.732687	NA	ADIRF	N.S.
1251.96	0.231327	0.193078	1.1981	0.230878	0.930164	ADK	N.S.
4294.84	-0.368537	0.236023	-1.56144	0.118419	0.762771	ADM	N.S.
1.7317	2.34586	3.62497	0.647139	0.517542	NA	ADM2	N.S.
61.1759	0.81886	0.662019	1.23691	0.21612	0.91445	ADM5	N.S.
3162.9	0.024887	0.18601	0.133794	0.893566	0.99919	ADNP	N.S.
2588.47	-0.0491907	0.171175	-0.287371	0.773828	0.99919	ADNP2	N.S.
2251.49	0.0191062	0.179548	0.106413	0.915255	0.99919	ADO	N.S.
143.228	0.0787484	0.422685	0.186305	0.852206	0.99919	ADORA1	N.S.
43.5062	-0.129555	0.726038	-0.17844	0.858377	0.99919	ADORA2A	N.S.
664.276	-0.477739	0.240423	-1.98707	0.0469141	0.502768	ADORA2B	N.S.
1.31316	3.75946	4.8243	0.779275	0.435818	NA	ADORA3	N.S.
2843.98	-0.0808556	0.168167	-0.480805	0.630655	0.99919	ADPGK	N.S.
0.296916	-1.71441	4.9772	-0.344453	0.730506	NA	ADPRH	N.S.
1132.5	0.298448	0.201853	1.47854	0.139263	0.808044	ADPRHL1	N.S.
2801.83	-0.233994	0.177028	-1.32179	0.186238	0.890873	ADPRHL2	N.S.
396.253	-0.0848819	0.342107	-0.248115	0.804045	0.99919	ADPRM	N.S.
0	NA	NA	NA	NA	NA	ADRA1A	N.S.
13.9525	-2.74138	1.76535	-1.55288	0.120452	0.767077	ADRA1B	N.S.
44.5336	1.7688	0.842439	2.09962	0.0357626	0.430464	ADRA1D	N.S.
10.3137	0.364624	1.6805	0.216973	0.828229	0.99919	ADRA2A	N.S.
41.6586	-0.591723	0.756112	-0.782587	0.43387	0.99919	ADRA2B	N.S.
4021.1	0.0579248	0.166091	0.348754	0.727274	0.99919	ADRA2C	N.S.
13.0831	-1.15929	1.44783	-0.80071	0.4233	0.99919	ADRB1	N.S.
3.13548	-5.15783	3.35869	-1.53567	0.12462	NA	ADRB2	N.S.
0	NA	NA	NA	NA	NA	ADRB3	N.S.
3565.87	-0.0741557	0.251783	-0.294522	0.768359	0.99919	ADRBK1	N.S.
1357.81	-0.222377	0.190815	-1.16541	0.243854	0.93625	ADRBK2	N.S.
10511.6	-0.0694355	0.191812	-0.361998	0.717353	0.99919	ADRM1	N.S.
4189.68	0.231597	0.161099	1.4376	0.150547	0.829242	ADSL	N.S.
2371.12	-0.132774	0.171937	-0.772224	0.439982	0.99919	ADSS	N.S.
792.017	0.314564	0.247392	1.27152	0.203543	0.904179	ADSSL1	N.S.
0	NA	NA	NA	NA	NA	ADTRP	N.S.
8.27911	-6.53144	2.4289	-2.68906	0.00716546	0.155045	AEBP1	N.S.
2175.2	0.164003	0.176798	0.927631	0.353599	0.997857	AEBP2	N.S.
6878.22	0.0528681	0.169131	0.312586	0.754595	0.99919	AEN	N.S.
20561.4	-0.0579887	0.14371	-0.40351	0.686573	0.99919	AES	N.S.
198.544	0.196985	0.607539	0.324235	0.74576	0.99919	AF011889.5	N.S.
3.18861	1.40252	2.83517	0.494687	0.620821	NA	AF111168.2	N.S.
20.8539	0.840367	1.12928	0.744159	0.45678	0.99919	AF131216.1	N.S.
0.929283	-3.41735	4.84583	-0.705215	0.480677	NA	AF165138.7	N.S.
3177.04	-0.314771	0.167579	-1.87834	0.0603346	0.567107	AFAP1	N.S.
1337.64	-0.183283	0.285937	-0.640993	0.521527	0.99919	AFAP1L1	N.S.
1205.59	0.0992811	0.238506	0.416262	0.677218	0.99919	AFAP1L2	N.S.
1909.79	-0.255691	0.17612	-1.4518	0.146558	0.820471	AFF1	N.S.
2.57606	0.0981692	3.10376	0.0316291	0.974768	NA	AFF2	N.S.
81.2044	-0.380214	0.66415	-0.572483	0.566995	0.99919	AFF3	N.S.
11749.2	-0.0409928	0.161163	-0.254356	0.799221	0.99919	AFF4	N.S.
6459.63	0.0748194	0.174908	0.427764	0.668823	0.99919	AFG3L2	N.S.
0	NA	NA	NA	NA	NA	AFM	N.S.
1742.25	0.510582	0.220179	2.31894	0.0203981	0.312489	AFMID	N.S.
0.929283	-3.41735	4.84583	-0.705215	0.480677	NA	AFP	N.S.
1965.89	0.0148548	0.259366	0.0572734	0.954327	0.99919	AFTPH	N.S.
363.794	0.0843889	0.320556	0.263258	0.792352	0.99919	AGA	N.S.
2732.51	-0.0517699	0.266898	-0.193968	0.846201	0.99919	AGAP1	N.S.
29.2661	-0.737137	1.02738	-0.717489	0.473072	0.99919	AGAP14P	N.S.
2210.97	0.240964	0.272051	0.88573	0.375763	0.99919	AGAP2	N.S.
5109.74	-0.0636442	0.179886	-0.353804	0.723486	0.99919	AGAP3	N.S.
234.932	0.445259	0.488617	0.911265	0.362156	0.99919	AGAP4	N.S.
75.3882	0.131188	0.679315	0.193117	0.846867	0.99919	AGAP5	N.S.
530.915	0.208403	0.356702	0.58425	0.559052	0.99919	AGAP6	N.S.
200.037	-0.219971	0.383762	-0.573198	0.566511	0.99919	AGAP9	N.S.
0	NA	NA	NA	NA	NA	AGBL1	N.S.
42.2547	2.70353	0.770552	3.50856	0.000450539	0.0191602	AGBL2	padj<0.05 & Upregulated
91.2267	1.00093	0.770864	1.29845	0.194131	0.898017	AGBL3	N.S.
24.1237	0.58767	1.07393	0.547216	0.584231	0.99919	AGBL4	N.S.
5583.48	0.232932	0.204186	1.14078	0.253961	0.941808	AGBL5	N.S.
42.742	-0.115621	0.812213	-0.142353	0.886801	0.99919	AGER	N.S.
4565.68	-0.118271	0.177992	-0.664473	0.506388	0.99919	AGFG1	N.S.
445.747	-0.0339843	0.292316	-0.116259	0.907447	0.99919	AGFG2	N.S.
3233.06	-0.012254	0.16613	-0.0737612	0.9412	0.99919	AGGF1	N.S.
1031.85	0.167002	0.206919	0.80709	0.419615	0.99919	AGK	N.S.
1634.59	0.182514	0.277063	0.658747	0.510058	0.99919	AGL	N.S.
14.3351	1.14205	1.3629	0.837951	0.402058	0.99919	AGMAT	N.S.
1.9199	-1.43437	4.11051	-0.34895	0.727127	NA	AGMO	N.S.
3591.57	0.0660944	0.17353	0.380882	0.703291	0.99919	AGO1	N.S.
4867	-0.444693	0.200254	-2.22064	0.0263753	0.361425	AGO2	N.S.
1744.6	-0.556777	0.199658	-2.78865	0.00529275	0.124371	AGO3	N.S.
1490.93	-0.267591	0.189402	-1.41282	0.15771	0.842319	AGO4	N.S.
6631.12	0.173418	0.199977	0.867191	0.385838	0.99919	AGPAT1	N.S.
3783.17	0.0501243	0.158041	0.31716	0.751122	0.99919	AGPAT2	N.S.
4080.18	-0.100069	0.162949	-0.614113	0.539141	0.99919	AGPAT3	N.S.
1453.91	0.30425	0.235131	1.29396	0.195679	0.898017	AGPAT4	N.S.
1409.08	0.0149193	0.195069	0.0764819	0.939036	0.99919	AGPAT5	N.S.
6162.63	-0.167953	0.164389	-1.02168	0.306932	0.971766	AGPS	N.S.
0.262632	1.40389	4.98093	0.281853	0.778056	NA	AGR2	N.S.
0	NA	NA	NA	NA	NA	AGR3	N.S.
32762.9	-0.808012	0.183656	-4.3996	1.08452e-05	0.000846788	AGRN	padj<0.05 & Downregulated
0	NA	NA	NA	NA	NA	AGRP	N.S.
3.75449	-1.13926	2.21979	-0.513229	0.607791	NA	AGT	N.S.
1614.74	-0.16082	0.232771	-0.690894	0.489632	0.99919	AGTPBP1	N.S.
1.86371	0.572341	3.5055	0.163269	0.870306	NA	AGTR1	N.S.
0.696963	-3.00521	4.86584	-0.617613	0.536831	NA	AGTR2	N.S.
3209.22	0.114992	0.174484	0.659038	0.509871	0.99919	AGTRAP	N.S.
3.18096	-1.5013	3.44457	-0.435844	0.66295	NA	AGXT	N.S.
0	NA	NA	NA	NA	NA	AGXT2	N.S.
7304.19	0.0600621	0.164972	0.364075	0.715802	0.99919	AHCTF1	N.S.
24797.8	0.319327	0.18266	1.7482	0.0804287	0.653212	AHCY	N.S.
11515.6	-0.500496	0.162063	-3.08828	0.00201321	0.0608791	AHCYL1	N.S.
1789.4	0.229861	0.237964	0.965948	0.33407	0.987264	AHCYL2	N.S.
1705.11	0.12624	0.184982	0.682446	0.494957	0.99919	AHDC1	N.S.
562.009	0.0419505	0.284566	0.147419	0.882801	0.99919	AHI1	N.S.
37760	-0.753925	0.230681	-3.26826	0.0010821	0.0377505	AHNAK	padj<0.05 & Downregulated
6080.75	-1.85581	0.236189	-7.8573	3.92503e-15	2.22775e-12	AHNAK2	padj<0.05 & Downregulated
31.8063	-1.06305	0.928492	-1.14492	0.25224	0.941763	AHR	N.S.
1597.87	-0.196737	0.216723	-0.907779	0.363995	0.99919	AHRR	N.S.
8005.1	0.0422965	0.202461	0.208912	0.834517	0.99919	AHSA1	N.S.
2071.61	0.333611	0.263401	1.26655	0.205315	0.904754	AHSA2	N.S.
4.99815	-1.4999	2.37179	-0.632391	0.527131	0.99919	AHSG	N.S.
0	NA	NA	NA	NA	NA	AHSP	N.S.
0	NA	NA	NA	NA	NA	AICDA	N.S.
5995.31	-0.220408	0.155014	-1.42186	0.155066	0.836622	AIDA	N.S.
0	NA	NA	NA	NA	NA	AIF1	N.S.
578.42	-0.0566521	0.333875	-0.169681	0.865261	0.99919	AIF1L	N.S.
6733.12	0.0717016	0.15665	0.457718	0.647155	0.99919	AIFM1	N.S.
93.8832	1.3235	0.516243	2.56372	0.0103557	0.201875	AIFM2	N.S.
77.5706	0.727783	0.726035	1.00241	0.316147	0.978477	AIFM3	N.S.
1756.95	0.351075	0.194727	1.80291	0.0714027	0.619433	AIG1	N.S.
10.4587	0.219175	1.47467	0.148626	0.881849	0.99919	AIM1	N.S.
74.3395	-0.859419	0.664216	-1.29388	0.195705	0.898017	AIM1L	N.S.
0.296916	-1.71441	4.9772	-0.344453	0.730506	NA	AIM2	N.S.
1771.3	0.0936867	0.263112	0.356072	0.721786	0.99919	AIMP1	N.S.
1785.77	0.161473	0.241874	0.66759	0.504395	0.99919	AIMP2	N.S.
2663.4	0.212108	0.168367	1.25979	0.207744	0.908078	AIP	N.S.
0	NA	NA	NA	NA	NA	AIPL1	N.S.
0	NA	NA	NA	NA	NA	AIRE	N.S.
0	NA	NA	NA	NA	NA	AJ239318.1	N.S.
168.778	0.370304	0.416088	0.889965	0.373485	0.99919	AJAP1	N.S.
5308.38	-0.257084	0.159376	-1.61307	0.10673	0.734182	AJUBA	N.S.
2853.72	0.438239	0.175023	2.5039	0.0122833	0.226581	AK1	N.S.
4770.22	0.200339	0.171481	1.16829	0.242691	0.93625	AK2	N.S.
4406.48	-0.0878557	0.16827	-0.522112	0.601592	0.99919	AK3	N.S.
1660.32	-0.713753	0.24318	-2.93508	0.00333464	0.0890517	AK4	N.S.
22.935	-1.12412	1.07557	-1.04514	0.295959	0.964481	AK5	N.S.
2048.73	0.176656	0.19654	0.898831	0.368743	0.99919	AK6	N.S.
151.314	-0.369798	0.438807	-0.842735	0.399376	0.99919	AK7	N.S.
60.9239	0.255482	0.657829	0.388371	0.697741	0.99919	AK8	N.S.
380.411	0.044948	0.285436	0.157471	0.874873	0.99919	AK9	N.S.
2545.81	0.180064	0.189787	0.948769	0.342738	0.992803	AKAP1	N.S.
1569.93	-0.0041112	0.200163	-0.0205392	0.983613	0.99919	AKAP10	N.S.
2834.16	0.0565807	0.219122	0.258216	0.79624	0.99919	AKAP11	N.S.
9940.79	-0.751331	0.151163	-4.97032	6.6841e-07	6.89771e-05	AKAP12	padj<0.05 & Downregulated
5681.41	-0.463612	0.195747	-2.36842	0.0178642	0.288426	AKAP13	N.S.
0.262632	1.40389	4.98093	0.281853	0.778056	NA	AKAP14	N.S.
2175.69	0.0401856	0.223877	0.179499	0.857546	0.99919	AKAP17A	N.S.
2478.11	-1.50309	0.194	-7.7479	9.34276e-15	5.10634e-12	AKAP2	padj<0.05 & Downregulated
160.086	-0.0452823	0.473053	-0.0957236	0.92374	0.99919	AKAP3	N.S.
0	NA	NA	NA	NA	NA	AKAP4	N.S.
345.567	0.19053	0.313734	0.607299	0.543652	0.99919	AKAP5	N.S.
223.961	-0.200054	0.463883	-0.431259	0.66628	0.99919	AKAP6	N.S.
262.002	-0.0376193	0.335555	-0.112111	0.910736	0.99919	AKAP7	N.S.
1831.95	-0.155056	0.209941	-0.738565	0.460171	0.99919	AKAP8	N.S.
7301.88	0.139752	0.212671	0.657126	0.5111	0.99919	AKAP8L	N.S.
3188.04	0.336181	0.178183	1.88671	0.059199	0.562075	AKAP9	N.S.
1915.02	-0.015515	0.185409	-0.0836799	0.933311	0.99919	AKIP1	N.S.
7210.52	-0.0288119	0.163204	-0.17654	0.85987	0.99919	AKIRIN1	N.S.
2381.14	-0.0292757	0.200243	-0.1462	0.883763	0.99919	AKIRIN2	N.S.
436.339	-0.14751	0.281082	-0.524795	0.599726	0.99919	AKNA	N.S.
0	NA	NA	NA	NA	NA	AKNAD1	N.S.
4309.99	0.0078965	0.185064	0.042669	0.965965	0.99919	AKR1A1	N.S.
5424.15	0.069851	0.154284	0.452743	0.650734	0.99919	AKR1B1	N.S.
22.6075	-1.04779	1.05813	-0.990227	0.322063	0.982713	AKR1B10	N.S.
0	NA	NA	NA	NA	NA	AKR1B15	N.S.
624.14	0.728544	0.423416	1.72063	0.0853175	0.671057	AKR1C1	N.S.
839.7	1.24434	0.388722	3.20109	0.00136907	0.0455031	AKR1C2	padj<0.05 & Upregulated
220.844	1.06308	0.532164	1.99766	0.0457532	0.497187	AKR1C3	N.S.
0	NA	NA	NA	NA	NA	AKR1C4	N.S.
0	NA	NA	NA	NA	NA	AKR1D1	N.S.
685.102	-0.438767	0.327924	-1.33801	0.180893	0.882995	AKR1E2	N.S.
3267.59	0.0168077	0.173277	0.0969989	0.922727	0.99919	AKR7A2	N.S.
24.5718	0.339594	1.05967	0.320471	0.748611	0.99919	AKR7A3	N.S.
8067.69	-0.0920859	0.169487	-0.543321	0.586909	0.99919	AKT1	N.S.
10446.1	0.122226	0.181466	0.673547	0.500599	0.99919	AKT1S1	N.S.
6552.36	-0.00700267	0.176531	-0.0396683	0.968358	0.99919	AKT2	N.S.
4679.88	-0.135224	0.172025	-0.786069	0.431827	0.99919	AKT3	N.S.
1263.52	0.0563382	0.200168	0.281455	0.778362	0.99919	AKTIP	N.S.
0	NA	NA	NA	NA	NA	AL008723.1	N.S.
8.15088	-6.54373	2.38929	-2.73878	0.00616677	0.140186	AL021546.6	N.S.
0	NA	NA	NA	NA	NA	AL022578.1	N.S.
4.23278	-0.907516	2.15021	-0.422059	0.672982	0.99919	AL023806.1	N.S.
0	NA	NA	NA	NA	NA	AL023875.1	N.S.
0.929283	-3.41735	4.84583	-0.705215	0.480677	NA	AL049794.1	N.S.
0	NA	NA	NA	NA	NA	AL049872.1	N.S.
0	NA	NA	NA	NA	NA	AL109927.1	N.S.
0	NA	NA	NA	NA	NA	AL133335.1	N.S.
0	NA	NA	NA	NA	NA	AL133475.1	N.S.
0.693816	2.84629	4.85896	0.585781	0.558023	NA	AL135745.1	N.S.
0	NA	NA	NA	NA	NA	AL135842.1	N.S.
3.50539	0.17963	2.29655	0.0782175	0.937655	NA	AL136097.1	N.S.
0	NA	NA	NA	NA	NA	AL137164.1	N.S.
0	NA	NA	NA	NA	NA	AL137860.1	N.S.
0	NA	NA	NA	NA	NA	AL138706.2	N.S.
0	NA	NA	NA	NA	NA	AL138751.1	N.S.
0	NA	NA	NA	NA	NA	AL139333.1	N.S.
0	NA	NA	NA	NA	NA	AL158839.1	N.S.
0	NA	NA	NA	NA	NA	AL162426.1	N.S.
305.832	-0.100226	0.399867	-0.250648	0.802086	0.99919	AL354822.1	N.S.
0	NA	NA	NA	NA	NA	AL354828.1	N.S.
0	NA	NA	NA	NA	NA	AL354828.2	N.S.
0	NA	NA	NA	NA	NA	AL356131.3	N.S.
0	NA	NA	NA	NA	NA	AL356135.1	N.S.
0.21562	1.26002	4.99034	0.252492	0.800661	NA	AL356289.1	N.S.
2.30557	-0.187228	3.25338	-0.0575487	0.954108	NA	AL356585.2	N.S.
2.30557	-0.187228	3.25338	-0.0575487	0.954108	NA	AL356585.3	N.S.
0	NA	NA	NA	NA	NA	AL357140.1	N.S.
4.50749	-0.567433	2.13128	-0.26624	0.790054	0.99919	AL358852.1	N.S.
0	NA	NA	NA	NA	NA	AL360294.1	N.S.
67.8404	0.181517	0.686066	0.264577	0.791336	0.99919	AL365181.2	N.S.
0	NA	NA	NA	NA	NA	AL365202.1	N.S.
0	NA	NA	NA	NA	NA	AL365273.1	N.S.
0	NA	NA	NA	NA	NA	AL445183.1	N.S.
0	NA	NA	NA	NA	NA	AL513412.1	N.S.
605.465	0.320943	0.279676	1.14755	0.251154	0.941763	AL513523.1	N.S.
605.034	0.319091	0.279387	1.14211	0.253409	0.941808	AL513523.2	N.S.
1322.13	-0.0121024	0.271154	-0.0446331	0.9644	0.99919	AL589743.1	N.S.
0	NA	NA	NA	NA	NA	AL590235.1	N.S.
0	NA	NA	NA	NA	NA	AL591806.1	N.S.
18.2334	-0.274752	1.07898	-0.25464	0.799001	0.99919	AL592183.1	N.S.
0	NA	NA	NA	NA	NA	AL596220.1	N.S.
0	NA	NA	NA	NA	NA	AL645728.1	N.S.
0	NA	NA	NA	NA	NA	AL645922.1	N.S.
0	NA	NA	NA	NA	NA	AL662852.1	N.S.
11.0212	0.728592	1.39237	0.523275	0.600783	0.99919	AL928654.7	N.S.
0	NA	NA	NA	NA	NA	AL929561.1	N.S.
2539.89	-0.0455119	0.17642	-0.257975	0.796426	0.99919	ALAD	N.S.
4756.53	0.272778	0.227895	1.19695	0.231328	0.930164	ALAS1	N.S.
0.63371	-1.22928	4.93825	-0.248929	0.803416	NA	ALAS2	N.S.
0.232321	-1.53534	4.98862	-0.307769	0.758258	NA	ALB	N.S.
99728	0.0977673	0.249809	0.391368	0.695525	0.99919	ALCAM	N.S.
850.687	-0.0153201	0.222621	-0.0688172	0.945135	0.99919	ALDH16A1	N.S.
5447.08	0.0687776	0.171027	0.402145	0.687577	0.99919	ALDH18A1	N.S.
69411.1	-0.110927	0.241402	-0.459511	0.645867	0.99919	ALDH1A1	N.S.
6.06952	0.80018	1.87837	0.425997	0.67011	0.99919	ALDH1A2	N.S.
1841.67	-0.503465	0.229029	-2.19826	0.0279308	0.371998	ALDH1A3	N.S.
3175.03	0.0184916	0.206316	0.0896274	0.928583	0.99919	ALDH1B1	N.S.
2.65809	0.917359	3.11579	0.294423	0.768435	NA	ALDH1L1	N.S.
872.553	-0.0238972	0.349516	-0.0683724	0.945489	0.99919	ALDH1L2	N.S.
33.6933	1.65062	0.845619	1.95197	0.050942	0.524599	ALDH2	N.S.
56.302	0.639691	0.642336	0.995883	0.319307	0.98024	ALDH3A1	N.S.
4056.07	-0.0835813	0.190297	-0.439215	0.660505	0.99919	ALDH3A2	N.S.
1360.46	-0.72425	0.247911	-2.92141	0.00348453	0.0921526	ALDH3B1	N.S.
4.91513	0.843847	2.03865	0.413924	0.67893	0.99919	ALDH3B2	N.S.
3462.02	-0.0503333	0.256362	-0.196337	0.844346	0.99919	ALDH4A1	N.S.
2820	0.154999	0.169913	0.912226	0.36165	0.99919	ALDH5A1	N.S.
782.799	0.244052	0.284782	0.85698	0.391456	0.99919	ALDH6A1	N.S.
2360.67	-0.143148	0.178016	-0.80413	0.421322	0.99919	ALDH7A1	N.S.
15.2453	-0.535869	1.22001	-0.439235	0.660491	0.99919	ALDH8A1	N.S.
4061.42	0.318077	0.176731	1.79977	0.0718962	0.620815	ALDH9A1	N.S.
27942.7	-0.0070517	0.181232	-0.0389098	0.968962	0.99919	ALDOA	N.S.
1.824	-4.36996	4.08679	-1.06929	0.284939	NA	ALDOB	N.S.
20.2073	-0.229845	1.17201	-0.196113	0.844522	0.99919	ALDOC	N.S.
1591.1	0.0729013	0.200738	0.363167	0.71648	0.99919	ALG1	N.S.
174.652	0.350858	0.40456	0.867258	0.385801	0.99919	ALG10	N.S.
703.808	-0.264244	0.922058	-0.28658	0.774434	0.99919	ALG10B	N.S.
672.962	-0.0921863	0.245814	-0.375025	0.707642	0.99919	ALG11	N.S.
2816.11	-0.0847842	0.205347	-0.412882	0.679693	0.99919	ALG12	N.S.
1506.87	0.015011	0.184565	0.0813317	0.935178	0.99919	ALG13	N.S.
229.594	1.44764	0.444443	3.25721	0.00112514	0.0387938	ALG14	padj<0.05 & Upregulated
2.72557	-1.11612	3.60513	-0.309591	0.756872	NA	ALG1L	N.S.
0	NA	NA	NA	NA	NA	ALG1L2	N.S.
2518.59	0.00260548	0.190327	0.0136895	0.989078	0.99919	ALG2	N.S.
2253.39	0.0245908	0.233926	0.105122	0.916279	0.99919	ALG3	N.S.
1209.29	0.0587759	0.23178	0.253585	0.799816	0.99919	ALG5	N.S.
927.184	0.191878	0.211023	0.909277	0.363204	0.99919	ALG6	N.S.
899.43	0.199725	0.23889	0.836052	0.403126	0.99919	ALG8	N.S.
778.055	-0.0122278	0.267693	-0.0456782	0.963567	0.99919	ALG9	N.S.
0	NA	NA	NA	NA	NA	ALK	N.S.
804.75	0.175515	0.268518	0.653642	0.513342	0.99919	ALKBH1	N.S.
1289.58	0.017741	0.190688	0.0930366	0.925875	0.99919	ALKBH2	N.S.
631.827	0.190349	0.279877	0.680115	0.496432	0.99919	ALKBH3	N.S.
1358.74	0.0937387	0.210709	0.444874	0.656411	0.99919	ALKBH4	N.S.
6981.3	0.197607	0.186342	1.06045	0.288939	0.960718	ALKBH5	N.S.
747.725	0.399179	0.25846	1.54445	0.122479	0.768105	ALKBH6	N.S.
1185.56	0.295046	0.19875	1.48451	0.137675	0.803508	ALKBH7	N.S.
806.227	0.244754	0.234323	1.04452	0.296246	0.964481	ALKBH8	N.S.
0.296916	-1.71441	4.9772	-0.344453	0.730506	NA	ALLC	N.S.
1800.24	-0.0746388	0.192188	-0.388364	0.697747	0.99919	ALMS1	N.S.
1.92296	4.31941	3.96957	1.08813	0.276538	NA	ALOX12	N.S.
50.0189	-0.291427	0.922285	-0.315984	0.752015	0.99919	ALOX12B	N.S.
10.9393	-2.42596	1.64649	-1.47341	0.140639	0.811703	ALOX15	N.S.
0	NA	NA	NA	NA	NA	ALOX15B	N.S.
0.825713	-3.23288	4.85409	-0.666011	0.505404	NA	ALOX5	N.S.
1.2283	-3.81412	4.79475	-0.795478	0.426335	NA	ALOX5AP	N.S.
66.6284	-1.21889	0.601002	-2.0281	0.0425503	0.477139	ALOXE3	N.S.
0.296916	-1.71441	4.9772	-0.344453	0.730506	NA	ALPI	N.S.
117.423	-0.956064	0.506262	-1.88847	0.0589622	0.561289	ALPK1	N.S.
157.783	-1.69194	0.612312	-2.7632	0.00572377	0.132391	ALPK2	N.S.
100.266	-2.12209	0.855503	-2.48052	0.0131192	0.235088	ALPK3	N.S.
2573.83	-0.0949451	0.171868	-0.552431	0.580653	0.99919	ALPL	N.S.
37.8655	0.0782443	0.960485	0.0814633	0.935074	0.99919	ALPP	N.S.
7.14335	0.508937	2.2447	0.226729	0.820635	0.99919	ALPPL2	N.S.
3419.13	-0.0258861	0.163768	-0.158065	0.874405	0.99919	ALS2	N.S.
1438.23	-0.0751393	0.308177	-0.243819	0.807371	0.99919	ALS2CL	N.S.
3.06757	0.744937	2.91381	0.255657	0.798216	NA	ALS2CR11	N.S.
6.28838	0.331588	2.07654	0.159683	0.873131	0.99919	ALS2CR12	N.S.
0.296916	-1.71441	4.9772	-0.344453	0.730506	NA	ALX1	N.S.
0	NA	NA	NA	NA	NA	ALX3	N.S.
651.827	-0.0496157	0.230986	-0.214799	0.829924	0.99919	ALX4	N.S.
4684.44	-0.05111	0.164418	-0.310854	0.755912	0.99919	ALYREF	N.S.
1067.6	0.0794127	0.239432	0.331672	0.740137	0.99919	AMACR	N.S.
0	NA	NA	NA	NA	NA	AMBN	N.S.
0.232321	-1.53534	4.98862	-0.307769	0.758258	NA	AMBP	N.S.
3939.61	-0.0189384	0.183683	-0.103104	0.91788	0.99919	AMBRA1	N.S.
2805.84	-0.128321	0.197229	-0.650622	0.51529	0.99919	AMD1	N.S.
122.381	-0.370232	0.49916	-0.74171	0.458263	0.99919	AMDHD1	N.S.
3019.58	-0.0726782	0.252093	-0.288299	0.773118	0.99919	AMDHD2	N.S.
0	NA	NA	NA	NA	NA	AMELX	N.S.
0	NA	NA	NA	NA	NA	AMELY	N.S.
855.414	-0.00718533	0.281679	-0.0255089	0.979649	0.99919	AMER1	N.S.
3.3844	-4.32094	3.48175	-1.24103	0.214596	NA	AMER2	N.S.
8.77919	-2.62306	1.75539	-1.49429	0.1351	0.798347	AMER3	N.S.
8545.07	0.15115	0.175805	0.859759	0.389922	0.99919	AMFR	N.S.
263.203	-0.112685	0.401155	-0.280902	0.778786	0.99919	AMH	N.S.
2.76882	0.382917	3.6381	0.105252	0.916176	NA	AMHR2	N.S.
1695.01	0.296229	0.180104	1.64476	0.100019	0.716334	AMIGO1	N.S.
95.8448	-0.119418	0.655234	-0.182252	0.855385	0.99919	AMIGO2	N.S.
26.9025	1.16836	1.60415	0.728339	0.466406	0.99919	AMIGO3	N.S.
666.889	-0.46991	0.253246	-1.85555	0.0635184	0.580756	AMMECR1	N.S.
5309.95	-0.279786	0.166938	-1.67598	0.0937413	0.694677	AMMECR1L	N.S.
10.7458	1.15526	1.69734	0.680628	0.496107	0.99919	AMN	N.S.
366.876	0.413403	0.337057	1.22651	0.220008	0.915758	AMN1	N.S.
1130.81	0.383371	0.297247	1.28974	0.197142	0.899295	AMOT	N.S.
5147.84	-0.419549	0.155208	-2.70313	0.0068689	0.150616	AMOTL1	N.S.
10459	-0.284505	0.163478	-1.74032	0.0818025	0.65929	AMOTL2	N.S.
0	NA	NA	NA	NA	NA	AMPD1	N.S.
3291.63	0.0977434	0.162199	0.602613	0.546766	0.99919	AMPD2	N.S.
44.3756	-0.0180358	0.759738	-0.0237395	0.98106	0.99919	AMPD3	N.S.
105.844	-0.074976	0.551605	-0.135923	0.891882	0.99919	AMPH	N.S.
273.782	0.60292	0.589795	1.02225	0.306661	0.971323	AMT	N.S.
0	NA	NA	NA	NA	NA	AMTN	N.S.
0	NA	NA	NA	NA	NA	AMY1A	N.S.
0	NA	NA	NA	NA	NA	AMY1B	N.S.
0	NA	NA	NA	NA	NA	AMY1C	N.S.
2.50109	-4.79132	3.64977	-1.31277	0.18926	NA	AMY2A	N.S.
248.672	0.0601138	0.586258	0.102538	0.918329	0.99919	AMY2B	N.S.
8.56083	0.220916	1.60429	0.137703	0.890475	0.99919	AMZ1	N.S.
5245.11	0.113452	0.163696	0.693069	0.488266	0.99919	AMZ2	N.S.
3955.56	0.0320077	0.17513	0.182766	0.854982	0.99919	ANAPC1	N.S.
541.496	0.00915261	0.249979	0.0366135	0.970793	0.99919	ANAPC10	N.S.
4007.77	0.225013	0.162338	1.38608	0.165722	0.854494	ANAPC11	N.S.
1692.38	0.249783	0.232236	1.07556	0.282126	0.960204	ANAPC13	N.S.
628.776	-0.352271	0.262187	-1.34359	0.179082	0.880365	ANAPC15	N.S.
3377.49	0.0742528	0.20368	0.364556	0.715443	0.99919	ANAPC16	N.S.
2745.26	-0.00986043	0.248477	-0.0396835	0.968345	0.99919	ANAPC2	N.S.
1089.84	-0.211126	0.204101	-1.03442	0.300941	0.968667	ANAPC4	N.S.
5256.89	0.0839962	0.160115	0.5246	0.599861	0.99919	ANAPC5	N.S.
3508.1	0.073229	0.164572	0.444967	0.656344	0.99919	ANAPC7	N.S.
1483.3	0.210574	0.260658	0.807855	0.419174	0.99919	ANG	N.S.
2224.99	0.0943066	0.206924	0.455755	0.648566	0.99919	ANGEL1	N.S.
1767.13	0.142149	0.197978	0.718	0.472757	0.99919	ANGEL2	N.S.
921.459	0.243666	0.227862	1.06936	0.284908	0.960204	ANGPT1	N.S.
11.8659	0.2254	1.49615	0.150654	0.880249	0.99919	ANGPT2	N.S.
3.32022	5.09923	3.30216	1.54421	0.122537	NA	ANGPT4	N.S.
232.65	-0.612393	0.465274	-1.3162	0.188108	0.892263	ANGPTL1	N.S.
0.643658	-0.563187	4.91782	-0.11452	0.908826	NA	ANGPTL2	N.S.
0	NA	NA	NA	NA	NA	ANGPTL3	N.S.
707.919	-0.104805	0.362545	-0.289082	0.772519	0.99919	ANGPTL4	N.S.
0	NA	NA	NA	NA	NA	ANGPTL5	N.S.
42.9191	1.94881	0.768182	2.53692	0.0111834	0.210366	ANGPTL6	N.S.
72.0244	-9.68398	1.57016	-6.16753	6.93648e-10	1.34293e-07	ANGPTL7	padj<0.05 & Downregulated
0	NA	NA	NA	NA	NA	ANGPTL8	N.S.
0	NA	NA	NA	NA	NA	ANHX	N.S.
488.509	-1.21514	0.409598	-2.96667	0.00301045	0.0828255	ANK1	N.S.
1486.96	-0.343662	0.184761	-1.86004	0.0628798	0.578863	ANK2	N.S.
1596.33	-0.0416742	0.199884	-0.208492	0.834845	0.99919	ANK3	N.S.
155.545	-0.431339	0.413961	-1.04198	0.297421	0.966324	ANKAR	N.S.
303.348	0.337315	0.31989	1.05447	0.291667	0.961603	ANKDD1A	N.S.
3.17843	-3.95963	2.91076	-1.36034	0.173722	NA	ANKDD1B	N.S.
333.991	0.208906	0.337816	0.618401	0.536311	0.99919	ANKEF1	N.S.
0	NA	NA	NA	NA	NA	ANKFN1	N.S.
6752.56	-0.205565	0.154636	-1.32935	0.183733	0.888571	ANKFY1	N.S.
2206.88	0.0988674	0.188382	0.524824	0.599706	0.99919	ANKH	N.S.
3946.68	0.1849	0.242504	0.762462	0.445784	0.99919	ANKHD1	N.S.
2355.14	0.00634662	0.211229	0.0300462	0.97603	0.99919	ANKHD1-EIF4EBP3	N.S.
4219.77	-0.32674	0.16264	-2.00898	0.0445392	0.490011	ANKIB1	N.S.
16.9023	0.0558739	1.7665	0.0316297	0.974767	0.99919	ANKK1	N.S.
46.6943	-0.160491	0.823549	-0.194877	0.845489	0.99919	ANKLE1	N.S.
6039.32	0.0325854	0.161789	0.201407	0.84038	0.99919	ANKLE2	N.S.
300.14	-0.221914	0.348358	-0.637027	0.524107	0.99919	ANKMY1	N.S.
1362.34	0.262367	0.209466	1.25255	0.21037	0.911713	ANKMY2	N.S.
667.123	0.263377	0.234303	1.12409	0.260975	0.944118	ANKRA2	N.S.
23641.4	-1.44345	0.144519	-9.98796	1.72091e-23	2.53954e-20	ANKRD1	padj<0.05 & Downregulated
1861.71	-0.458	0.24198	-1.89272	0.0583949	0.558842	ANKRD10	N.S.
10179.6	-0.306717	0.204932	-1.49668	0.134478	0.798347	ANKRD11	N.S.
1987.81	-0.228739	0.234798	-0.974193	0.329961	0.987004	ANKRD12	N.S.
1694.88	-0.0830007	0.230311	-0.360386	0.718559	0.99919	ANKRD13A	N.S.
5221.17	-0.250248	0.271598	-0.921394	0.356845	0.99919	ANKRD13B	N.S.
1762.66	-0.199181	0.181074	-1.1	0.271333	0.95224	ANKRD13C	N.S.
1870.03	0.089479	0.212781	0.420521	0.674105	0.99919	ANKRD13D	N.S.
528.923	-0.0613837	0.274407	-0.223696	0.822994	0.99919	ANKRD16	N.S.
6279.72	0.0611844	0.219947	0.278178	0.780876	0.99919	ANKRD17	N.S.
345.099	0.148974	0.54551	0.273091	0.784784	0.99919	ANKRD18A	N.S.
190.859	0.026989	0.491408	0.0549218	0.956201	0.99919	ANKRD18B	N.S.
19.2419	-2.86874	1.24152	-2.31066	0.0208516	0.315921	ANKRD2	N.S.
28.183	0.109677	1.14536	0.0957577	0.923713	0.99919	ANKRD20A1	N.S.
38.1003	-0.519711	0.820947	-0.633062	0.526693	0.99919	ANKRD20A2	N.S.
10.1293	1.05176	2.00121	0.52556	0.599194	0.99919	ANKRD20A3	N.S.
42.011	0.431187	0.757682	0.569087	0.569297	0.99919	ANKRD20A4	N.S.
0	NA	NA	NA	NA	NA	ANKRD22	N.S.
141.046	-0.128272	0.454961	-0.281941	0.777989	0.99919	ANKRD23	N.S.
1619.3	0.173486	0.331433	0.523443	0.600666	0.99919	ANKRD24	N.S.
955.299	0.324065	0.283452	1.14328	0.252923	0.941808	ANKRD26	N.S.
2523.6	-0.0414299	0.194507	-0.212999	0.831328	0.99919	ANKRD27	N.S.
2407.63	-0.373387	0.234297	-1.59365	0.111015	0.746696	ANKRD28	N.S.
306.378	-0.291333	0.363133	-0.802275	0.422394	0.99919	ANKRD29	N.S.
0.431241	2.17199	4.9026	0.443027	0.657746	NA	ANKRD30A	N.S.
0.890748	-3.33689	4.84931	-0.688116	0.49138	NA	ANKRD30B	N.S.
0	NA	NA	NA	NA	NA	ANKRD30BL	N.S.
53.0088	-0.232473	0.926416	-0.250938	0.801862	0.99919	ANKRD31	N.S.
0	NA	NA	NA	NA	NA	ANKRD33	N.S.
1483.63	-1.74018	0.194136	-8.96373	3.13889e-19	2.57337e-16	ANKRD33B	padj<0.05 & Downregulated
317.138	-0.310937	0.322954	-0.962792	0.335652	0.987365	ANKRD34A	N.S.
443.062	0.0615087	0.360093	0.170813	0.86437	0.99919	ANKRD34B	N.S.
1.43802	0.0635894	3.86855	0.0164375	0.986885	NA	ANKRD34C	N.S.
2.88278	1.13384	2.96834	0.381979	0.702477	NA	ANKRD35	N.S.
218.589	-0.182635	0.379528	-0.481216	0.630363	0.99919	ANKRD36	N.S.
205.489	-0.0436082	0.396347	-0.110025	0.912389	0.99919	ANKRD36B	N.S.
131.827	0.209055	0.487809	0.428559	0.668244	0.99919	ANKRD36C	N.S.
131.568	-0.248316	0.504699	-0.492008	0.622713	0.99919	ANKRD37	N.S.
849.059	0.154572	0.213796	0.722987	0.469688	0.99919	ANKRD39	N.S.
3559.08	-0.103123	0.173415	-0.594658	0.552072	0.99919	ANKRD40	N.S.
849.906	0.0248215	0.224089	0.110766	0.911802	0.99919	ANKRD42	N.S.
593.547	0.658381	0.448282	1.46868	0.141921	0.812698	ANKRD44	N.S.
1.10448	0.346516	4.76839	0.0726693	0.942069	NA	ANKRD45	N.S.
1227.23	0.0909241	0.22012	0.413066	0.679559	0.99919	ANKRD46	N.S.
747.872	-0.131387	0.234927	-0.559268	0.575979	0.99919	ANKRD49	N.S.
3086.54	-0.0958692	0.219555	-0.436653	0.662363	0.99919	ANKRD50	N.S.
7512.25	-0.217298	0.178918	-1.21451	0.224552	0.921476	ANKRD52	N.S.
0.593832	-2.7473	4.88154	-0.562794	0.573575	NA	ANKRD53	N.S.
1940.86	0.013419	0.206294	0.0650479	0.948136	0.99919	ANKRD54	N.S.
0	NA	NA	NA	NA	NA	ANKRD55	N.S.
1584.98	0.0306126	0.186993	0.16371	0.869959	0.99919	ANKRD6	N.S.
0	NA	NA	NA	NA	NA	ANKRD60	N.S.
7.77051	2.03392	2.25801	0.900757	0.367718	0.99919	ANKRD61	N.S.
0.21562	1.26002	4.99034	0.252492	0.800661	NA	ANKRD62	N.S.
0	NA	NA	NA	NA	NA	ANKRD63	N.S.
23.4095	1.15014	1.01078	1.13788	0.25517	0.942341	ANKRD65	N.S.
0	NA	NA	NA	NA	NA	ANKRD66	N.S.
11.8226	0.0375241	1.41145	0.0265854	0.97879	0.99919	ANKRD7	N.S.
3010.45	-0.182977	0.171953	-1.06411	0.28728	0.960204	ANKRD9	N.S.
3280.54	-0.0991961	0.162574	-0.610159	0.541757	0.99919	ANKS1A	N.S.
253.325	-0.0256953	0.522428	-0.0491843	0.960772	0.99919	ANKS1B	N.S.
923.329	0.341275	0.229841	1.48483	0.137589	0.803508	ANKS3	N.S.
0	NA	NA	NA	NA	NA	ANKS4B	N.S.
3302.9	0.150639	0.1649	0.913515	0.360972	0.99919	ANKS6	N.S.
1.49845	-2.42303	3.82552	-0.633385	0.526482	NA	ANKUB1	N.S.
1554.06	-0.35005	0.217445	-1.60983	0.107435	0.735666	ANKZF1	N.S.
1405.19	0.364341	0.306067	1.1904	0.233891	0.932593	ANLN	N.S.
6.70761	-1.32234	2.11174	-0.626182	0.531196	0.99919	ANO1	N.S.
2217.85	-0.337468	0.181997	-1.85425	0.063703	0.58147	ANO10	N.S.
2.69308	-0.337324	2.75692	-0.122355	0.902617	NA	ANO2	N.S.
2.05783	-1.90441	3.99847	-0.476284	0.633872	NA	ANO3	N.S.
0.646861	2.75264	4.86389	0.565934	0.571439	NA	ANO4	N.S.
25.5459	0.192936	0.941594	0.204904	0.837647	0.99919	ANO5	N.S.
4988.65	-0.0953646	0.179657	-0.530815	0.595547	0.99919	ANO6	N.S.
186.767	-0.0546604	0.48802	-0.112004	0.91082	0.99919	ANO7	N.S.
2311.06	-0.0698444	0.332481	-0.21007	0.833613	0.99919	ANO8	N.S.
29.9727	-1.36327	1.02407	-1.33123	0.183114	0.88698	ANO9	N.S.
4474.05	0.250531	0.334746	0.748422	0.454206	0.99919	ANOS1	N.S.
6742.1	0.0822329	0.175969	0.467314	0.640275	0.99919	ANP32A	N.S.
5027.73	0.0273873	0.162325	0.168718	0.866018	0.99919	ANP32B	N.S.
0	NA	NA	NA	NA	NA	ANP32D	N.S.
3678.57	0.273099	0.165207	1.65307	0.0983167	0.710161	ANP32E	N.S.
17.3282	-2.1619	1.93039	-1.11993	0.262745	0.945308	ANPEP	N.S.
2675.05	0.129393	0.194354	0.66576	0.505565	0.99919	ANTXR1	N.S.
9463.42	0.000631759	0.646988	0.00097646	0.999221	0.99956	ANTXR2	N.S.
7.86051	-4.86424	2.30309	-2.11205	0.0346821	0.426421	ANTXRL	N.S.
18281.6	-0.962087	0.2476	-3.88565	0.000102057	0.00553697	ANXA1	padj<0.05 & Downregulated
0	NA	NA	NA	NA	NA	ANXA10	N.S.
8332.65	-0.0546843	0.1587	-0.344577	0.730413	0.99919	ANXA11	N.S.
1.14602	-2.01863	4.83835	-0.417214	0.676522	NA	ANXA13	N.S.
47000.1	-0.79208	0.146468	-5.40788	6.37754e-08	8.55576e-06	ANXA2	padj<0.05 & Downregulated
293.91	0.251829	0.331587	0.759466	0.447574	0.99919	ANXA2R	N.S.
11.8887	-2.55711	1.51884	-1.68359	0.0922609	0.691771	ANXA3	N.S.
10575.2	-0.488712	0.145937	-3.34879	0.000811651	0.0298691	ANXA4	padj<0.05 & Downregulated
14139.3	-0.386701	0.16255	-2.37897	0.0173613	0.281849	ANXA5	N.S.
12710.2	0.0117933	0.185394	0.0636122	0.949279	0.99919	ANXA6	N.S.
4714.72	-0.0995696	0.180886	-0.550455	0.582007	0.99919	ANXA7	N.S.
50.4567	-2.75905	0.83343	-3.31048	0.000931355	0.0334404	ANXA8	padj<0.05 & Downregulated
55.4514	-1.60506	0.698711	-2.29717	0.0216092	0.322085	ANXA8L1	N.S.
56.6529	-0.11991	0.63989	-0.187391	0.851354	0.99919	ANXA9	N.S.
0	NA	NA	NA	NA	NA	AOAH	N.S.
24.5725	1.44953	1.16733	1.24175	0.214329	0.913328	AOC1	N.S.
937.112	-0.286104	0.313832	-0.911648	0.361954	0.99919	AOC2	N.S.
318.826	-0.468478	0.507954	-0.922284	0.356381	0.99919	AOC3	N.S.
30.6842	-3.73411	1.16372	-3.20876	0.00133309	0.0445076	AOX1	padj<0.05 & Downregulated
25.6905	1.83713	1.521	1.20785	0.227106	0.924332	AP000275.65	N.S.
7.8476	0.42902	1.85704	0.231024	0.817296	0.99919	AP000295.9	N.S.
0	NA	NA	NA	NA	NA	AP000304.12	N.S.
0	NA	NA	NA	NA	NA	AP000322.53	N.S.
0	NA	NA	NA	NA	NA	AP000349.1	N.S.
0	NA	NA	NA	NA	NA	AP000349.2	N.S.
18.8483	-2.40138	1.14834	-2.09118	0.0365118	0.436434	AP000350.10	N.S.
0	NA	NA	NA	NA	NA	AP000351.1	N.S.
0.262632	1.40389	4.98093	0.281853	0.778056	NA	AP000687.1	N.S.
0	NA	NA	NA	NA	NA	AP000721.4	N.S.
0	NA	NA	NA	NA	NA	AP000769.1	N.S.
2.55411	1.7541	3.08658	0.568298	0.569833	NA	AP000866.1	N.S.
0	NA	NA	NA	NA	NA	AP001888.1	N.S.
0.890748	-3.33689	4.84931	-0.688116	0.49138	NA	AP002884.2	N.S.
0	NA	NA	NA	NA	NA	AP002962.1	N.S.
225.121	-0.0193473	0.519535	-0.0372396	0.970294	0.99919	AP003419.11	N.S.
0	NA	NA	NA	NA	NA	AP005242.1	N.S.
21.1536	-2.33987	1.11169	-2.10478	0.0353109	0.428126	AP006285.1	N.S.
21.1536	-2.33987	1.11169	-2.10478	0.0353109	0.428126	AP006285.2	N.S.
2212.09	-0.0891814	0.170533	-0.522957	0.601005	0.99919	AP1AR	N.S.
7013.45	0.268705	0.149236	1.80054	0.0717756	0.620341	AP1B1	N.S.
6368.61	0.0931211	0.156459	0.595177	0.551725	0.99919	AP1G1	N.S.
1037.36	-0.356713	0.343944	-1.03712	0.299678	0.968143	AP1G2	N.S.
7531.94	-0.0425233	0.148673	-0.28602	0.774863	0.99919	AP1M1	N.S.
399.749	0.300893	0.343966	0.874776	0.381696	0.99919	AP1M2	N.S.
7373.34	-0.119757	0.152871	-0.783388	0.433399	0.99919	AP1S1	N.S.
3216.42	-0.0514863	0.259139	-0.198682	0.842511	0.99919	AP1S2	N.S.
802.211	-0.226349	0.239349	-0.945689	0.344307	0.993437	AP1S3	N.S.
6350.24	-0.0586006	0.150849	-0.388472	0.697667	0.99919	AP2A1	N.S.
8486.55	-0.0831439	0.149469	-0.556262	0.578032	0.99919	AP2A2	N.S.
25082.6	-0.186163	0.165548	-1.12452	0.260792	0.944118	AP2B1	N.S.
22531.6	-0.0281652	0.146503	-0.192251	0.847546	0.99919	AP2M1	N.S.
4574.95	0.130457	0.170957	0.763098	0.445405	0.99919	AP2S1	N.S.
4719.33	0.0958308	0.168551	0.568557	0.569657	0.99919	AP3B1	N.S.
450.489	-0.361215	0.312941	-1.15426	0.248393	0.940049	AP3B2	N.S.
22218.1	-0.0201439	0.148544	-0.135609	0.892131	0.99919	AP3D1	N.S.
3550.94	-0.0448664	0.192622	-0.232924	0.81582	0.99919	AP3M1	N.S.
1205.82	0.228505	0.213856	1.0685	0.285297	0.960204	AP3M2	N.S.
2507.9	0.0610212	0.175441	0.347816	0.727978	0.99919	AP3S1	N.S.
2388.61	0.0211453	0.201523	0.104927	0.916433	0.99919	AP3S2	N.S.
1091.88	0.0840153	0.198974	0.422243	0.672848	0.99919	AP4B1	N.S.
1020.6	-0.114209	0.220392	-0.518208	0.604313	0.99919	AP4E1	N.S.
1050.65	0.0704262	0.261192	0.269634	0.787442	0.99919	AP4M1	N.S.
708.66	0.310276	0.255494	1.21441	0.22459	0.921476	AP4S1	N.S.
3560.02	-0.284621	0.178031	-1.59871	0.109884	0.742654	AP5B1	N.S.
1596.34	-0.153359	0.217689	-0.704486	0.48113	0.99919	AP5M1	N.S.
1167.32	0.0677612	0.212363	0.319083	0.749664	0.99919	AP5S1	N.S.
4625.56	-0.0203213	0.212913	-0.0954439	0.923962	0.99919	AP5Z1	N.S.
2983.71	-0.0762895	0.190773	-0.399898	0.689232	0.99919	APAF1	N.S.
1059.08	-0.0507588	0.380309	-0.133467	0.893824	0.99919	APBA1	N.S.
3083.4	-0.203267	0.232131	-0.875655	0.381218	0.99919	APBA2	N.S.
1581.96	0.172984	0.24608	0.702957	0.482082	0.99919	APBA3	N.S.
4295.65	0.0328197	0.166475	0.197145	0.843714	0.99919	APBB1	N.S.
0.525265	2.4306	4.88347	0.497719	0.618682	NA	APBB1IP	N.S.
8630.42	-0.0218192	0.211048	-0.103385	0.917657	0.99919	APBB2	N.S.
616.309	-0.303168	0.38309	-0.791375	0.428725	0.99919	APBB3	N.S.
5384.31	-0.214327	0.217623	-0.984855	0.324695	0.985183	APC	N.S.
4125.43	-0.368693	0.657208	-0.561	0.574798	0.99919	APC2	N.S.
0.21562	1.26002	4.99034	0.252492	0.800661	NA	APCDD1	N.S.
1.48458	-4.0777	4.8235	-0.845382	0.397898	NA	APCDD1L	N.S.
0	NA	NA	NA	NA	NA	APCS	N.S.
2676.93	-0.189072	0.230155	-0.821498	0.411362	0.99919	APEH	N.S.
126.929	-0.238219	0.555178	-0.429086	0.667861	0.99919	APELA	N.S.
9345.43	0.304332	0.163489	1.86148	0.0626767	0.577995	APEX1	N.S.
1350.99	-0.177187	0.226831	-0.781143	0.434718	0.99919	APEX2	N.S.
11355.1	-0.0151269	0.157916	-0.0957914	0.923686	0.99919	APH1A	N.S.
752.118	-0.481615	0.238198	-2.02191	0.0431858	0.481703	APH1B	N.S.
8024.77	-0.13162	0.161621	-0.814371	0.415432	0.99919	API5	N.S.
626.171	0.150287	0.246311	0.61015	0.541762	0.99919	APIP	N.S.
608.203	0.224214	0.290313	0.772319	0.439925	0.99919	APITD1	N.S.
27.2499	0.920613	1.04061	0.884686	0.376326	0.99919	APITD1-CORT	N.S.
433.177	-0.00741767	0.269397	-0.0275343	0.978034	0.99919	APLF	N.S.
23.6339	-0.798751	1.02063	-0.782605	0.433859	0.99919	APLN	N.S.
0	NA	NA	NA	NA	NA	APLNR	N.S.
9929.77	0.418392	0.230085	1.81843	0.0689987	0.606095	APLP1	N.S.
43938.9	0.0639919	0.179511	0.356479	0.721482	0.99919	APLP2	N.S.
7631.35	-0.0432844	0.150193	-0.288193	0.773199	0.99919	APMAP	N.S.
522.216	-1.38473	0.377986	-3.66344	0.000248852	0.0115119	APOA1	padj<0.05 & Downregulated
7279.1	0.365656	0.162364	2.25208	0.0243171	0.346043	APOA1BP	N.S.
1.76905	0.369083	4.22974	0.087259	0.930466	NA	APOA2	N.S.
0.232321	-1.53534	4.98862	-0.307769	0.758258	NA	APOA4	N.S.
0	NA	NA	NA	NA	NA	APOA5	N.S.
0	NA	NA	NA	NA	NA	APOB	N.S.
0	NA	NA	NA	NA	NA	APOBEC1	N.S.
5.54139	0.115542	2.37298	0.0486907	0.961166	0.99919	APOBEC2	N.S.
0	NA	NA	NA	NA	NA	APOBEC3A	N.S.
29.5221	-3.28212	0.962483	-3.41006	0.000649491	0.0254908	APOBEC3B	padj<0.05 & Downregulated
387.073	-1.28682	0.328381	-3.91869	8.90327e-05	0.00503393	APOBEC3C	padj<0.05 & Downregulated
9.43052	-1.45876	2.0392	-0.715359	0.474387	0.99919	APOBEC3D	N.S.
868.852	-0.294274	0.2119	-1.38874	0.164911	0.85358	APOBEC3F	N.S.
27.819	1.16835	1.03455	1.12933	0.258759	0.943752	APOBEC3G	N.S.
31.0036	-0.608957	0.99755	-0.610453	0.541562	0.99919	APOBEC3H	N.S.
0	NA	NA	NA	NA	NA	APOBEC4	N.S.
54.5843	0.157818	0.661718	0.238497	0.811496	0.99919	APOBR	N.S.
355.338	-0.0266908	0.286877	-0.0930393	0.925872	0.99919	APOC1	N.S.
0	NA	NA	NA	NA	NA	APOC2	N.S.
5.53263	-3.27311	2.32616	-1.40708	0.159402	0.843102	APOC3	N.S.
0	NA	NA	NA	NA	NA	APOC4	N.S.
3.02644	0.638635	3.52775	0.181032	0.856343	NA	APOC4-APOC2	N.S.
11.7023	0.948115	1.39326	0.680504	0.496186	0.99919	APOD	N.S.
45374.1	0.587639	0.169567	3.46553	0.000529186	0.0218745	APOE	padj<0.05 & Upregulated
1.05053	3.43633	4.83418	0.710841	0.477183	NA	APOF	N.S.
0	NA	NA	NA	NA	NA	APOH	N.S.
1202.39	-1.25133	0.419036	-2.9862	0.00282471	0.0787394	APOL1	N.S.
4522.18	-0.612468	0.189691	-3.22877	0.00124323	0.0422725	APOL2	padj<0.05 & Downregulated
138.013	0.0279847	0.45145	0.0619884	0.950572	0.99919	APOL3	N.S.
31.3072	-0.831508	0.926111	-0.897849	0.369266	0.99919	APOL4	N.S.
0	NA	NA	NA	NA	NA	APOL5	N.S.
370.275	-1.02711	0.524059	-1.95991	0.0500066	0.520047	APOL6	N.S.
119.403	-0.218261	0.469253	-0.465125	0.641842	0.99919	APOLD1	N.S.
20.5801	0.343845	1.12748	0.304968	0.760391	0.99919	APOM	N.S.
899.703	0.469961	0.217697	2.15878	0.0308669	0.394375	APOO	N.S.
1752.06	0.135703	0.195004	0.695901	0.486491	0.99919	APOOL	N.S.
1691.35	0.276283	0.222249	1.24312	0.213823	0.912665	APOPT1	N.S.
58288.5	-0.319928	0.1409	-2.27061	0.0231709	0.335976	APP	N.S.
4997.48	-0.214403	0.158378	-1.35374	0.17582	0.875602	APPBP2	N.S.
3733.97	0.0164793	0.159386	0.103393	0.917651	0.99919	APPL1	N.S.
1215.29	0.385125	0.265627	1.44987	0.147094	0.821425	APPL2	N.S.
2590.01	-0.107477	0.208075	-0.51653	0.605484	0.99919	APRT	N.S.
1827.82	-0.0293091	0.179994	-0.162834	0.870649	0.99919	APTX	N.S.
180.119	-1.17175	0.455471	-2.57262	0.0100933	0.198596	AQP1	N.S.
0	NA	NA	NA	NA	NA	AQP10	N.S.
283.46	0.00971857	0.317754	0.0305852	0.9756	0.99919	AQP11	N.S.
0	NA	NA	NA	NA	NA	AQP12A	N.S.
0	NA	NA	NA	NA	NA	AQP12B	N.S.
0.890748	-3.33689	4.84931	-0.688116	0.49138	NA	AQP2	N.S.
27.2766	-1.75958	1.03252	-1.70416	0.0883516	0.681193	AQP3	N.S.
0	NA	NA	NA	NA	NA	AQP4	N.S.
2.40351	-1.42603	3.13508	-0.454864	0.649207	NA	AQP5	N.S.
26.2496	1.27977	1.29187	0.990636	0.321863	0.982713	AQP6	N.S.
2.79183	-2.45627	2.96971	-0.827108	0.408176	NA	AQP7	N.S.
3.03178	-3.60031	2.9712	-1.21174	0.225613	NA	AQP8	N.S.
0.561597	-0.278867	4.96079	-0.0562142	0.955171	NA	AQP9	N.S.
3505.92	-0.0104836	0.193224	-0.0542561	0.956731	0.99919	AQR	N.S.
534.723	-0.292197	0.266104	-1.09806	0.27218	0.95224	AR	N.S.
5077.83	0.0946667	0.163752	0.578109	0.56319	0.99919	ARAF	N.S.
7834.83	-0.105456	0.192391	-0.548133	0.583601	0.99919	ARAP1	N.S.
865.538	-0.56598	0.227678	-2.48588	0.0129233	0.233998	ARAP2	N.S.
20.9598	2.2956	1.14656	2.00216	0.0452678	0.494828	ARAP3	N.S.
330.247	-0.900267	0.390134	-2.30759	0.0210221	0.317527	ARC	N.S.
11260.8	0.103963	0.170203	0.610815	0.541322	0.99919	ARCN1	N.S.
9.68001	-0.921672	1.58602	-0.581122	0.561158	0.99919	AREG	N.S.
4641.86	-0.0784286	0.189198	-0.414532	0.678484	0.99919	AREL1	N.S.
34386.4	0.0877315	0.14452	0.607055	0.543814	0.99919	ARF1	N.S.
14626.5	-0.0299324	0.185107	-0.161703	0.87154	0.99919	ARF3	N.S.
12812.6	-0.0595897	0.146667	-0.406294	0.684527	0.99919	ARF4	N.S.
8742.06	-0.0181494	0.171708	-0.105699	0.915821	0.99919	ARF5	N.S.
5408.53	-0.0713015	0.157817	-0.4518	0.651413	0.99919	ARF6	N.S.
11477.7	0.124475	0.159527	0.780277	0.435228	0.99919	ARFGAP1	N.S.
4054.15	-0.0327496	0.182942	-0.179016	0.857925	0.99919	ARFGAP2	N.S.
3551.6	0.0690629	0.160669	0.429847	0.667307	0.99919	ARFGAP3	N.S.
5422.53	0.050943	0.159279	0.319835	0.749094	0.99919	ARFGEF1	N.S.
2283.38	-0.0748205	0.177781	-0.420858	0.673859	0.99919	ARFGEF2	N.S.
1452.84	-0.78889	0.187732	-4.20221	2.64317e-05	0.00186628	ARFGEF3	padj<0.05 & Downregulated
2096.97	-0.0354033	0.173453	-0.204109	0.838269	0.99919	ARFIP1	N.S.
5914.53	0.289103	0.160869	1.79714	0.0723141	0.622602	ARFIP2	N.S.
2199.19	0.0351093	0.243395	0.144248	0.885305	0.99919	ARFRP1	N.S.
0	NA	NA	NA	NA	NA	ARG1	N.S.
124.048	0.658359	0.465849	1.41325	0.157584	0.841949	ARG2	N.S.
0	NA	NA	NA	NA	NA	ARGFX	N.S.
1491.59	-0.142594	0.295755	-0.482136	0.629709	0.99919	ARGLU1	N.S.
5119.04	-0.119067	0.175583	-0.678124	0.497693	0.99919	ARHGAP1	N.S.
853.5	-0.175838	0.217795	-0.807357	0.419461	0.99919	ARHGAP10	N.S.
702.246	0.530532	0.31591	1.67938	0.0930788	0.693646	ARHGAP11A	N.S.
69.7716	0.462519	0.745559	0.620365	0.535017	0.99919	ARHGAP11B	N.S.
1604.99	-0.190772	0.22959	-0.830926	0.406016	0.99919	ARHGAP12	N.S.
6.8077	-1.6584	1.75517	-0.944868	0.344726	0.993437	ARHGAP15	N.S.
4144.06	-0.0844948	0.157652	-0.535958	0.591988	0.99919	ARHGAP17	N.S.
515.471	0.0440077	0.304402	0.144571	0.88505	0.99919	ARHGAP18	N.S.
1224.07	0.299363	0.271205	1.10382	0.269669	0.949921	ARHGAP19	N.S.
2.51668	1.89152	3.09036	0.612071	0.540491	NA	ARHGAP19-SLIT1	N.S.
22.0555	0.00698389	1.05884	0.0065958	0.994737	0.999292	ARHGAP20	N.S.
3291.36	-0.370784	0.17027	-2.17762	0.0294342	0.384261	ARHGAP21	N.S.
353.71	0.273706	0.324381	0.84378	0.398792	0.99919	ARHGAP22	N.S.
5289.32	-0.280142	0.240155	-1.1665	0.243411	0.93625	ARHGAP23	N.S.
5.54942	0.66408	1.91269	0.347197	0.728443	0.99919	ARHGAP24	N.S.
0.512528	-0.311835	4.97003	-0.062743	0.949971	NA	ARHGAP25	N.S.
652.919	-0.190089	0.308416	-0.61634	0.53767	0.99919	ARHGAP26	N.S.
2338.27	-0.584938	0.213688	-2.73734	0.00619377	0.140186	ARHGAP27	N.S.
12.7856	-1.49938	1.53555	-0.976447	0.328843	0.986887	ARHGAP28	N.S.
848.875	-3.02699	0.313745	-9.64793	5.0158e-22	5.28701e-19	ARHGAP29	padj<0.05 & Downregulated
85.4036	-0.683995	0.552575	-1.23783	0.215778	0.914223	ARHGAP30	N.S.
231.555	0.10453	0.491417	0.212711	0.831552	0.99919	ARHGAP31	N.S.
2352.97	-0.423128	0.179834	-2.35288	0.0186286	0.296231	ARHGAP32	N.S.
850.233	0.464941	0.347833	1.33668	0.181328	0.884212	ARHGAP33	N.S.
7689.05	-0.153601	0.153727	-0.999181	0.317707	0.978994	ARHGAP35	N.S.
2.14301	4.43647	3.85032	1.15223	0.249225	NA	ARHGAP36	N.S.
2495.72	0.11517	0.21113	0.545493	0.585414	0.99919	ARHGAP39	N.S.
562.056	0.157236	0.452913	0.347167	0.728466	0.99919	ARHGAP4	N.S.
0	NA	NA	NA	NA	NA	ARHGAP40	N.S.
916.926	-0.0785037	0.249	-0.315276	0.752552	0.99919	ARHGAP42	N.S.
1445.12	-0.088644	0.193549	-0.457993	0.646957	0.99919	ARHGAP44	N.S.
3843.33	-0.280848	0.165634	-1.6956	0.0899622	0.687149	ARHGAP5	N.S.
10.4144	-0.802941	1.44663	-0.555043	0.578865	0.99919	ARHGAP6	N.S.
1079.15	-0.422673	0.216778	-1.9498	0.0512005	0.525429	ARHGAP8	N.S.
22.0284	0.940316	1.08813	0.864157	0.387502	0.99919	ARHGAP9	N.S.
21379.4	-0.138881	0.147092	-0.944176	0.34508	0.993437	ARHGDIA	N.S.
0.296916	-1.71441	4.9772	-0.344453	0.730506	NA	ARHGDIB	N.S.
285.709	-1.17651	0.342075	-3.43934	0.000583125	0.0235916	ARHGDIG	padj<0.05 & Downregulated
3171.41	0.075647	0.249386	0.303333	0.761636	0.99919	ARHGEF1	N.S.
3401.13	-0.0320354	0.206135	-0.15541	0.876498	0.99919	ARHGEF10	N.S.
1047.37	-0.809909	0.21123	-3.83426	0.000125943	0.00661404	ARHGEF10L	padj<0.05 & Downregulated
7034.68	0.147288	0.161154	0.913961	0.360737	0.99919	ARHGEF11	N.S.
7955.11	-0.0613469	0.159695	-0.384151	0.700866	0.99919	ARHGEF12	N.S.
5.59724	-3.23884	2.21873	-1.45977	0.144353	0.817468	ARHGEF15	N.S.
1854.08	0.225178	0.208596	1.07949	0.280367	0.959533	ARHGEF16	N.S.
3920.4	0.204357	0.210112	0.972611	0.330747	0.987004	ARHGEF17	N.S.
5553.98	-0.0659987	0.2085	-0.31654	0.751592	0.99919	ARHGEF18	N.S.
145.796	-0.919811	0.596404	-1.54226	0.12301	0.76842	ARHGEF19	N.S.
4446.41	0.0448742	0.17568	0.255432	0.79839	0.99919	ARHGEF2	N.S.
1151.92	-0.189626	0.28508	-0.665168	0.505943	0.99919	ARHGEF25	N.S.
2589	0.529359	0.70758	0.748127	0.454384	0.99919	ARHGEF26	N.S.
137.087	-1.84279	0.650045	-2.83486	0.00458454	0.112569	ARHGEF28	N.S.
1942.99	-0.71262	0.20547	-3.46824	0.000523873	0.0217157	ARHGEF3	padj<0.05 & Downregulated
5.06343	-0.789817	1.94156	-0.406795	0.684159	0.99919	ARHGEF33	N.S.
0	NA	NA	NA	NA	NA	ARHGEF35	N.S.
16.1237	-2.62152	1.39006	-1.8859	0.0593085	0.562075	ARHGEF37	N.S.
1.59311	-1.42324	4.38857	-0.324307	0.745705	NA	ARHGEF38	N.S.
190.363	0.519627	0.3767	1.37942	0.167765	0.859324	ARHGEF39	N.S.
408.956	0.270783	0.314729	0.860369	0.389585	0.99919	ARHGEF4	N.S.
2991.15	0.140016	0.228939	0.611589	0.540809	0.99919	ARHGEF40	N.S.
0	NA	NA	NA	NA	NA	ARHGEF5	N.S.
415.617	-0.26339	0.324684	-0.811219	0.41724	0.99919	ARHGEF6	N.S.
4208.74	-0.1787	0.159242	-1.12219	0.261781	0.944946	ARHGEF7	N.S.
685.04	0.409709	0.303479	1.35004	0.177003	0.877403	ARHGEF9	N.S.
8911.22	-0.0405511	0.150048	-0.270254	0.786965	0.99919	ARID1A	N.S.
4515.47	0.0529009	0.161122	0.328329	0.742663	0.99919	ARID1B	N.S.
2453.18	0.215191	0.181656	1.1846	0.236174	0.935281	ARID2	N.S.
1972.3	-0.458324	0.196276	-2.3351	0.0195382	0.304783	ARID3A	N.S.
1672.51	0.183642	0.233887	0.785173	0.432352	0.99919	ARID3B	N.S.
5.48129	-2.00902	2.27655	-0.882486	0.377514	0.99919	ARID3C	N.S.
1128.98	-0.0992369	0.203412	-0.487862	0.625647	0.99919	ARID4A	N.S.
2849.88	-0.127013	0.173879	-0.730467	0.465105	0.99919	ARID4B	N.S.
941.269	-0.46762	0.292446	-1.599	0.109821	0.742654	ARID5A	N.S.
5522.46	-0.593168	0.180176	-3.29216	0.000994206	0.035268	ARID5B	padj<0.05 & Downregulated
5525.88	-0.105216	0.152391	-0.690435	0.489921	0.99919	ARIH1	N.S.
6760.95	0.0794703	0.156921	0.506435	0.612551	0.99919	ARIH2	N.S.
214.452	0.549184	0.379458	1.44728	0.147818	0.8219	ARIH2OS	N.S.
3612.21	0.0714121	0.185297	0.385393	0.699946	0.99919	ARL1	N.S.
3617.38	-0.0934222	0.175946	-0.530971	0.595439	0.99919	ARL10	N.S.
0	NA	NA	NA	NA	NA	ARL11	N.S.
1.18766	-3.75431	4.83318	-0.776778	0.43729	NA	ARL13A	N.S.
1301.69	0.374095	0.271415	1.37831	0.168106	0.859578	ARL13B	N.S.
4.16933	-5.57365	2.92985	-1.90237	0.0571232	0.552659	ARL14	N.S.
1175.42	-0.0227839	0.2327	-0.0979112	0.922003	0.99919	ARL14EP	N.S.
0.232321	-1.53534	4.98862	-0.307769	0.758258	NA	ARL14EPL	N.S.
948.537	0.0426926	0.244394	0.174688	0.861325	0.99919	ARL15	N.S.
2428.62	0.169089	0.19529	0.865835	0.386581	0.99919	ARL16	N.S.
382.428	0.205142	0.306436	0.669444	0.503212	0.99919	ARL17A	N.S.
187.915	0.217315	0.402489	0.539929	0.589246	0.99919	ARL17B	N.S.
4372.67	0.0962825	0.158799	0.606316	0.544305	0.99919	ARL2	N.S.
1.29372	3.74798	4.82462	0.776845	0.43725	NA	ARL2-SNX15	N.S.
4685.55	-0.0792246	0.16427	-0.482282	0.629606	0.99919	ARL2BP	N.S.
888.212	0.289151	0.235054	1.23015	0.218642	0.915758	ARL3	N.S.
7329.41	-0.0963962	0.150633	-0.639943	0.52221	0.99919	ARL4A	N.S.
282.249	-0.683935	0.381894	-1.7909	0.0733087	0.625707	ARL4C	N.S.
2026.69	0.341446	0.246748	1.38379	0.166424	0.856617	ARL4D	N.S.
3631.7	0.133343	0.193675	0.688487	0.491146	0.99919	ARL5A	N.S.
2916.64	-0.189459	0.205522	-0.921842	0.356611	0.99919	ARL5B	N.S.
0.913001	-1.60485	4.85843	-0.330323	0.741156	NA	ARL5C	N.S.
501.06	0.177489	0.348619	0.50912	0.610668	0.99919	ARL6	N.S.
7970.37	0.0722808	0.220844	0.327293	0.743447	0.99919	ARL6IP1	N.S.
2352.35	-0.302428	0.21336	-1.41745	0.156351	0.840039	ARL6IP4	N.S.
4906.6	-0.0322923	0.178453	-0.180957	0.856401	0.99919	ARL6IP5	N.S.
1321.27	0.0561905	0.292062	0.192392	0.847435	0.99919	ARL6IP6	N.S.
5911.49	-0.0120692	0.16065	-0.0751269	0.940114	0.99919	ARL8A	N.S.
7181.59	0.0281009	0.158167	0.177666	0.858985	0.99919	ARL8B	N.S.
2.4451	-0.432533	3.76226	-0.114966	0.908472	NA	ARL9	N.S.
2957.92	-0.0917863	0.166243	-0.552122	0.580865	0.99919	ARMC1	N.S.
2216.86	0.0243959	0.172905	0.141094	0.887796	0.99919	ARMC10	N.S.
38.862	-0.368494	0.802407	-0.459236	0.646065	0.99919	ARMC12	N.S.
95.8588	0.231054	0.568897	0.406144	0.684637	0.99919	ARMC2	N.S.
1.22678	-3.81241	4.79694	-0.794757	0.426755	NA	ARMC3	N.S.
0	NA	NA	NA	NA	NA	ARMC4	N.S.
2958.22	1.04882	0.19003	5.51923	3.40488e-08	4.87824e-06	ARMC5	padj<0.05 & Upregulated
3368.26	0.170895	0.168091	1.01668	0.309305	0.973078	ARMC6	N.S.
1724.87	0.259155	0.251742	1.02945	0.30327	0.969038	ARMC7	N.S.
1775.05	-0.110269	0.194397	-0.567237	0.570553	0.99919	ARMC8	N.S.
978.158	0.21716	0.22479	0.966057	0.334016	0.987264	ARMC9	N.S.
16.1383	0.567218	1.16866	0.485358	0.627423	0.99919	ARMCX1	N.S.
0	NA	NA	NA	NA	NA	ARMCX2	N.S.
7016.06	-0.131151	0.212157	-0.618178	0.536458	0.99919	ARMCX3	N.S.
212.534	0.727304	0.356112	2.04235	0.041117	0.469324	ARMCX4	N.S.
1003.13	0.226674	0.203205	1.11549	0.26464	0.945593	ARMCX5	N.S.
2938.76	0.0972161	0.168058	0.578466	0.562949	0.99919	ARMCX6	N.S.
3.22629	5.05899	3.25644	1.55354	0.120295	NA	ARMS2	N.S.
1340.28	0.310314	0.189357	1.63878	0.10126	0.718409	ARMT1	N.S.
5753.22	0.0416134	0.176302	0.236034	0.813406	0.99919	ARNT	N.S.
576.011	-0.295777	0.286025	-1.0341	0.301092	0.968667	ARNT2	N.S.
587.131	-0.25871	0.262269	-0.986429	0.323923	0.983848	ARNTL	N.S.
1116.58	-0.186615	0.236814	-0.788023	0.430683	0.99919	ARNTL2	N.S.
7665.74	0.192412	0.153744	1.25151	0.210748	0.91203	ARPC1A	N.S.
6345.51	-0.183151	0.186812	-0.980404	0.326887	0.986887	ARPC1B	N.S.
11085.6	-0.0156873	0.146748	-0.1069	0.914868	0.99919	ARPC2	N.S.
8450.09	-0.0167684	0.174429	-0.0961335	0.923415	0.99919	ARPC3	N.S.
3588.08	0.0744566	0.188553	0.394885	0.692928	0.99919	ARPC4	N.S.
290.079	-0.728222	0.439889	-1.65547	0.0978298	0.707525	ARPC4-TTLL3	N.S.
14266.3	0.00880903	0.174173	0.0505763	0.959663	0.99919	ARPC5	N.S.
2357.49	0.188298	0.199217	0.94519	0.344562	0.993437	ARPC5L	N.S.
2393.92	-0.106204	0.218636	-0.485754	0.627141	0.99919	ARPIN	N.S.
7909.08	-0.200358	0.163583	-1.22481	0.220645	0.915758	ARPP19	N.S.
1.72496	4.16179	4.8147	0.864391	0.387373	NA	ARPP21	N.S.
0	NA	NA	NA	NA	NA	ARR3	N.S.
1329.05	-0.517539	0.224274	-2.30762	0.02102	0.317527	ARRB1	N.S.
1347.35	-0.0780719	0.224669	-0.347498	0.728217	0.99919	ARRB2	N.S.
1384.57	0.0482245	0.253833	0.189985	0.849321	0.99919	ARRDC1	N.S.
2330.52	-0.185022	0.185106	-0.999547	0.31753	0.978994	ARRDC2	N.S.
2254.4	-0.958662	0.234756	-4.08366	4.43323e-05	0.0028333	ARRDC3	padj<0.05 & Downregulated
1608.02	-0.406353	0.182621	-2.22512	0.0260731	0.358989	ARRDC4	N.S.
0.296916	-1.71441	4.9772	-0.344453	0.730506	NA	ARRDC5	N.S.
2382.19	-0.255846	0.263954	-0.969284	0.332404	0.987004	ARSA	N.S.
1291.02	0.0423901	0.210534	0.201345	0.840429	0.99919	ARSB	N.S.
1981.32	-0.231612	0.175859	-1.31703	0.187827	0.892263	ARSD	N.S.
2.18754	-1.90102	3.40694	-0.557986	0.576854	NA	ARSE	N.S.
0	NA	NA	NA	NA	NA	ARSF	N.S.
404.355	-0.0149882	0.327323	-0.0457904	0.963477	0.99919	ARSG	N.S.
0	NA	NA	NA	NA	NA	ARSH	N.S.
27.0066	-1.52871	1.09069	-1.4016	0.161034	0.846362	ARSI	N.S.
37.4343	-1.68493	1.18529	-1.42153	0.155162	0.836622	ARSJ	N.S.
1092.99	0.171011	0.246996	0.692363	0.488709	0.99919	ARSK	N.S.
3.26806	-0.124726	2.9274	-0.0426065	0.966015	NA	ART1	N.S.
0	NA	NA	NA	NA	NA	ART3	N.S.
0.787897	3.01934	4.85063	0.622463	0.533638	NA	ART4	N.S.
0	NA	NA	NA	NA	NA	ART5	N.S.
17.4715	-0.42537	1.11698	-0.380821	0.703336	0.99919	ARTN	N.S.
873.871	0.277204	0.224529	1.2346	0.216978	0.914582	ARV1	N.S.
2954.37	-0.529843	0.17513	-3.02543	0.00248282	0.071282	ARVCF	N.S.
47.1048	-0.080165	0.767764	-0.104414	0.916841	0.99919	ARX	N.S.
22.2862	-0.631025	1.11097	-0.567993	0.57004	0.99919	AS3MT	N.S.
5158.2	0.196296	0.155125	1.2654	0.205728	0.904754	ASAH1	N.S.
94.8998	0.382518	0.72095	0.530575	0.595714	0.99919	ASAH2	N.S.
359.736	0.0871634	0.348513	0.250101	0.80251	0.99919	ASAH2B	N.S.
6151.99	-0.361171	0.155564	-2.32169	0.0202497	0.311277	ASAP1	N.S.
1174.33	-0.690619	0.208077	-3.31905	0.000903241	0.03251	ASAP2	padj<0.05 & Downregulated
1789.23	-0.272891	0.194949	-1.3998	0.161572	0.846807	ASAP3	N.S.
1692.78	-0.211656	0.201708	-1.04932	0.29403	0.964328	ASB1	N.S.
0	NA	NA	NA	NA	NA	ASB10	N.S.
0	NA	NA	NA	NA	NA	ASB11	N.S.
8.81489	0.95205	1.57323	0.605157	0.545075	0.99919	ASB12	N.S.
1762.33	-0.353135	0.186337	-1.89514	0.0580744	0.556857	ASB13	N.S.
12.0386	0.180287	1.32499	0.136067	0.891768	0.99919	ASB14	N.S.
0	NA	NA	NA	NA	NA	ASB15	N.S.
138.125	0.200283	0.436554	0.45878	0.646392	0.99919	ASB16	N.S.
0	NA	NA	NA	NA	NA	ASB17	N.S.
1.03591	3.38792	4.84561	0.699174	0.484443	NA	ASB18	N.S.
56.0682	-1.33991	0.672169	-1.9934	0.0462173	0.497831	ASB2	N.S.
974.928	-0.0813366	0.209483	-0.388272	0.697815	0.99919	ASB3	N.S.
0	NA	NA	NA	NA	NA	ASB4	N.S.
1.0313	-2.44948	4.85876	-0.504137	0.614165	NA	ASB5	N.S.
3573.88	0.0340425	0.199499	0.17064	0.864507	0.99919	ASB6	N.S.
1165.58	-0.150823	0.215386	-0.700245	0.483774	0.99919	ASB7	N.S.
1646.47	-0.0202608	0.234433	-0.0864248	0.931129	0.99919	ASB8	N.S.
2.98347	-5.09355	3.34991	-1.5205	0.128385	NA	ASB9	N.S.
1899.96	0.0727375	0.245997	0.295684	0.767471	0.99919	ASCC1	N.S.
3861.87	0.309083	0.201672	1.53261	0.125373	0.775085	ASCC2	N.S.
6376.59	0.101511	0.165272	0.614206	0.539079	0.99919	ASCC3	N.S.
2.07841	-4.5646	4.7034	-0.970489	0.331803	NA	ASCL1	N.S.
13.14	-0.827903	1.26133	-0.656374	0.511583	0.99919	ASCL2	N.S.
0	NA	NA	NA	NA	NA	ASCL3	N.S.
0	NA	NA	NA	NA	NA	ASCL4	N.S.
12.7113	1.0357	1.30749	0.79213	0.428285	0.99919	ASCL5	N.S.
1290.08	0.189086	0.224036	0.843999	0.39867	0.99919	ASF1A	N.S.
439.732	0.723591	0.291508	2.48223	0.0130562	0.235028	ASF1B	N.S.
39.25	0.953869	0.786738	1.21244	0.225346	0.922705	ASGR1	N.S.
0	NA	NA	NA	NA	NA	ASGR2	N.S.
4330.34	0.0538538	0.164101	0.328175	0.742779	0.99919	ASH1L	N.S.
2695	0.2005	0.166138	1.20683	0.227496	0.924332	ASH2L	N.S.
1127.29	0.136823	0.329076	0.41578	0.677571	0.99919	ASIC1	N.S.
0.464642	-2.42569	4.90538	-0.494495	0.620957	NA	ASIC2	N.S.
160.445	-0.0657293	0.567746	-0.115772	0.907833	0.99919	ASIC3	N.S.
53.9775	-1.03021	0.700075	-1.47157	0.141136	0.811987	ASIC4	N.S.
0	NA	NA	NA	NA	NA	ASIC5	N.S.
1.51642	2.1058	3.82009	0.551243	0.581467	NA	ASIP	N.S.
768.813	-0.149846	0.267915	-0.559307	0.575952	0.99919	ASL	N.S.
0	NA	NA	NA	NA	NA	ASMT	N.S.
818.156	0.289709	0.22606	1.28156	0.199997	0.902137	ASMTL	N.S.
5302.34	0.277913	0.189482	1.4667	0.142457	0.813877	ASNA1	N.S.
2912	-0.00954457	0.312495	-0.0305431	0.975634	0.99919	ASNS	N.S.
5068.39	0.15396	0.18926	0.813483	0.415941	0.99919	ASNSD1	N.S.
2.0277	0.718035	2.9696	0.241795	0.808939	NA	ASPA	N.S.
7.5973	-0.225008	1.82757	-0.123119	0.902013	0.99919	ASPDH	N.S.
0.21562	1.26002	4.99034	0.252492	0.800661	NA	ASPG	N.S.
4089.15	-0.145298	0.179243	-0.810622	0.417583	0.99919	ASPH	N.S.
1529.36	-0.117775	0.185587	-0.634606	0.525685	0.99919	ASPHD1	N.S.
432.25	-0.142747	0.354858	-0.402266	0.687488	0.99919	ASPHD2	N.S.
860.158	0.544729	0.249953	2.17933	0.0293074	0.383413	ASPM	N.S.
1.27414	-2.19068	4.06803	-0.53851	0.590225	NA	ASPN	N.S.
43.6934	1.36525	0.792625	1.72245	0.0849888	0.66961	ASPRV1	N.S.
3616.19	0.0104195	0.19161	0.0543786	0.956634	0.99919	ASPSCR1	N.S.
1307.04	0.374867	0.206774	1.81294	0.0698417	0.610939	ASRGL1	N.S.
9.27462	3.07737	1.71237	1.79714	0.0723127	0.622602	ASS1	N.S.
372.313	0.0414375	0.330642	0.125324	0.900267	0.99919	ASTE1	N.S.
0	NA	NA	NA	NA	NA	ASTL	N.S.
5.33125	-5.92979	2.69331	-2.20168	0.0276882	0.369769	ASTN1	N.S.
1641.96	0.0744839	0.18507	0.402462	0.687344	0.99919	ASTN2	N.S.
1775.68	0.117717	0.178162	0.660727	0.508788	0.99919	ASUN	N.S.
8945.36	0.0634613	0.184501	0.343962	0.730875	0.99919	ASXL1	N.S.
3845.65	-0.173243	0.159164	-1.08845	0.276395	0.955586	ASXL2	N.S.
15.0476	0.153223	1.26603	0.121026	0.90367	0.99919	ASXL3	N.S.
0	NA	NA	NA	NA	NA	ASZ1	N.S.
3467.12	0.00737586	0.183969	0.0400929	0.968019	0.99919	ATAD1	N.S.
2230.63	0.245089	0.199617	1.22779	0.219525	0.915758	ATAD2	N.S.
2105.19	0.155593	0.206861	0.752165	0.451952	0.99919	ATAD2B	N.S.
1747.85	-0.205618	0.197995	-1.0385	0.299035	0.968143	ATAD3A	N.S.
1549.72	0.551813	0.208446	2.64727	0.00811442	0.170288	ATAD3B	N.S.
36.1269	0.330711	1.05541	0.31335	0.754015	0.99919	ATAD3C	N.S.
339.786	0.538206	0.331075	1.62563	0.104028	0.727898	ATAD5	N.S.
672.397	-0.220144	0.250096	-0.880239	0.37873	0.99919	ATAT1	N.S.
0.21562	1.26002	4.99034	0.252492	0.800661	NA	ATCAY	N.S.
1799.14	-0.0119881	0.211371	-0.0567158	0.954772	0.99919	ATE1	N.S.
923.505	-0.1367	0.216672	-0.630907	0.528101	0.99919	ATF1	N.S.
5099.45	0.0399778	0.163539	0.244454	0.806879	0.99919	ATF2	N.S.
1386.2	-2.10522	1.02881	-2.04628	0.0407292	0.467009	ATF3	N.S.
17292.4	0.0214295	0.280033	0.0765251	0.939001	0.99919	ATF4	N.S.
3769.84	0.203701	0.207572	0.981349	0.326421	0.986886	ATF5	N.S.
3747.81	0.0726587	0.17314	0.419653	0.674739	0.99919	ATF6	N.S.
2680.91	-0.366529	0.210604	-1.74037	0.0817942	0.65929	ATF6B	N.S.
3282.73	0.0686158	0.160527	0.427442	0.669058	0.99919	ATF7	N.S.
2268.58	0.138216	0.260447	0.530687	0.595635	0.99919	ATF7IP	N.S.
481.694	0.0571838	0.264043	0.216571	0.828543	0.99919	ATF7IP2	N.S.
476.029	0.188519	0.259862	0.725458	0.468171	0.99919	ATG10	N.S.
2897.81	0.115055	0.23007	0.500089	0.617012	0.99919	ATG101	N.S.
1919.04	0.191992	0.196596	0.976582	0.328776	0.986887	ATG12	N.S.
6205.9	-0.100915	0.152683	-0.660942	0.50865	0.99919	ATG13	N.S.
2184.59	0.125057	0.248132	0.503995	0.614265	0.99919	ATG14	N.S.
1800.97	-0.119605	0.22331	-0.535601	0.592234	0.99919	ATG16L1	N.S.
701.727	0.293448	0.418052	0.701941	0.482716	0.99919	ATG16L2	N.S.
2471.51	0.0895175	0.219737	0.407384	0.683726	0.99919	ATG2A	N.S.
2659.85	-0.210873	0.167885	-1.25605	0.209096	0.908909	ATG2B	N.S.
2770.4	0.238164	0.188007	1.26678	0.205234	0.904754	ATG3	N.S.
822.355	0.178706	0.251385	0.710883	0.477157	0.99919	ATG4A	N.S.
4572.52	-0.0117422	0.161371	-0.0727654	0.941993	0.99919	ATG4B	N.S.
567.679	0.239392	0.360568	0.663931	0.506734	0.99919	ATG4C	N.S.
1012.91	0.12604	0.207081	0.60865	0.542756	0.99919	ATG4D	N.S.
1852.28	0.00591207	0.186743	0.0316589	0.974744	0.99919	ATG5	N.S.
1648.29	-0.255358	0.202279	-1.26241	0.206802	0.905881	ATG7	N.S.
8662.93	-0.1117	0.180121	-0.620139	0.535166	0.99919	ATG9A	N.S.
269.322	-3.39584	0.447534	-7.58791	3.25118e-14	1.54767e-11	ATG9B	padj<0.05 & Downregulated
2892.76	0.12397	0.98005	0.126493	0.899342	0.99919	ATHL1	N.S.
4697.85	0.00702201	0.172831	0.0406293	0.967591	0.99919	ATIC	N.S.
546.604	-0.413117	0.284405	-1.45257	0.146345	0.820069	ATL1	N.S.
2634.43	0.0520461	0.182964	0.284461	0.776057	0.99919	ATL2	N.S.
4055.8	-0.138156	0.184748	-0.747809	0.454576	0.99919	ATL3	N.S.
3869.94	-0.132609	0.193934	-0.683782	0.494113	0.99919	ATM	N.S.
4744.68	-0.0867914	0.217046	-0.399876	0.689248	0.99919	ATMIN	N.S.
9127.12	-0.00896979	0.149265	-0.0600929	0.952082	0.99919	ATN1	N.S.
0	NA	NA	NA	NA	NA	ATOH1	N.S.
29.208	0.23906	0.90667	0.263668	0.792036	0.99919	ATOH7	N.S.
336.921	0.722586	0.322832	2.23827	0.0252035	0.353208	ATOH8	N.S.
2471.03	-0.00352787	0.208329	-0.0169341	0.986489	0.99919	ATOX1	N.S.
4.55587	-5.6971	2.94192	-1.93653	0.0528033	0.533712	ATP10A	N.S.
0.447946	-0.133442	4.98146	-0.0267877	0.978629	NA	ATP10B	N.S.
1529.97	-0.219024	0.197279	-1.11022	0.266904	0.947942	ATP10D	N.S.
4454.83	-0.440767	0.236447	-1.86413	0.0623039	0.577033	ATP11A	N.S.
4845.65	-0.0754521	0.174843	-0.431542	0.666074	0.99919	ATP11B	N.S.
3107.84	-0.0340626	0.254192	-0.134004	0.8934	0.99919	ATP11C	N.S.
1.84834	0.220222	3.47333	0.0634038	0.949445	NA	ATP12A	N.S.
4672.14	-0.0811412	0.218524	-0.371314	0.710403	0.99919	ATP13A1	N.S.
6305.67	0.0843418	0.19635	0.429548	0.667525	0.99919	ATP13A2	N.S.
3839.96	-0.288542	0.159499	-1.80906	0.0704425	0.613412	ATP13A3	N.S.
2.04958	2.97298	3.55572	0.836112	0.403092	NA	ATP13A4	N.S.
0.525265	2.4306	4.88347	0.497719	0.618682	NA	ATP13A5	N.S.
12144.1	-0.103198	0.16082	-0.641698	0.521069	0.99919	ATP1A1	N.S.
22.2773	-4.67302	1.23728	-3.77686	0.000158816	0.00799877	ATP1A2	padj<0.05 & Downregulated
1304.23	0.100583	0.201812	0.498399	0.618203	0.99919	ATP1A3	N.S.
0.890748	-3.33689	4.84931	-0.688116	0.49138	NA	ATP1A4	N.S.
823.66	-0.14466	0.227645	-0.635464	0.525126	0.99919	ATP1B1	N.S.
0	NA	NA	NA	NA	NA	ATP1B2	N.S.
4108.68	-0.108917	0.204538	-0.532503	0.594378	0.99919	ATP1B3	N.S.
0	NA	NA	NA	NA	NA	ATP1B4	N.S.
67.8068	0.0572124	0.777244	0.0736093	0.941321	0.99919	ATP2A1	N.S.
12413.6	0.0795756	0.155652	0.51124	0.609183	0.99919	ATP2A2	N.S.
322.775	0.354025	0.393706	0.899213	0.368539	0.99919	ATP2A3	N.S.
5424.69	-0.013294	0.265742	-0.0500258	0.960102	0.99919	ATP2B1	N.S.
0	NA	NA	NA	NA	NA	ATP2B2	N.S.
1.0584	-3.59463	4.83881	-0.742876	0.457557	NA	ATP2B3	N.S.
15567.2	-0.403421	0.247653	-1.62898	0.103318	0.725337	ATP2B4	N.S.
6643.71	-0.0504024	0.163572	-0.308136	0.757979	0.99919	ATP2C1	N.S.
11.0027	1.31048	1.49726	0.875252	0.381437	0.99919	ATP2C2	N.S.
6.1986	-2.57174	2.13857	-1.20255	0.229149	0.926883	ATP4A	N.S.
0	NA	NA	NA	NA	NA	ATP4B	N.S.
22038.8	0.208788	0.168175	1.24149	0.214424	0.913469	ATP5A1	N.S.
25326	0.122487	0.150636	0.813138	0.416139	0.99919	ATP5B	N.S.
5588.33	0.173776	0.173673	1.0006	0.317021	0.978994	ATP5C1	N.S.
4000.25	0.191858	0.202712	0.946453	0.343917	0.993437	ATP5D	N.S.
5819.61	0.196458	0.154187	1.27415	0.20261	0.903572	ATP5E	N.S.
0.958276	-0.291053	4.54593	-0.0640249	0.94895	NA	ATP5EP2	N.S.
6700.98	0.283387	0.160368	1.7671	0.0772111	0.640835	ATP5F1	N.S.
1660.68	0.172691	0.193485	0.892529	0.37211	0.99919	ATP5G1	N.S.
6354.59	0.00172991	0.15459	0.0111903	0.991072	0.99919	ATP5G2	N.S.
9800.79	0.206507	0.159217	1.29701	0.194626	0.898017	ATP5G3	N.S.
4336.67	0.108782	0.155975	0.69743	0.485534	0.99919	ATP5H	N.S.
1212.16	0.0433046	0.199599	0.216959	0.828241	0.99919	ATP5I	N.S.
2746	0.0970984	0.185209	0.524264	0.600095	0.99919	ATP5J	N.S.
3832.21	0.171805	0.167359	1.02656	0.304626	0.969038	ATP5J2	N.S.
1227.06	0.0227286	0.277253	0.0819777	0.934664	0.99919	ATP5J2-PTCD1	N.S.
5272.06	0.427087	0.208498	2.0484	0.0405206	0.465588	ATP5L	N.S.
2.74137	0.0417707	2.53747	0.0164615	0.986866	NA	ATP5L2	N.S.
5052.37	0.173219	0.161823	1.07042	0.284431	0.960204	ATP5O	N.S.
744.267	0.255748	0.223176	1.14595	0.251817	0.941763	ATP5S	N.S.
3301.61	0.0849618	0.215426	0.39439	0.693293	0.99919	ATP5SL	N.S.
8248.84	0.314186	0.162705	1.93102	0.0534811	0.537911	ATP6AP1	N.S.
120.546	0.311545	0.511382	0.609221	0.542378	0.99919	ATP6AP1L	N.S.
11791	0.171746	0.153631	1.11791	0.263606	0.945309	ATP6AP2	N.S.
11429.1	0.00378451	0.154323	0.0245234	0.980435	0.99919	ATP6V0A1	N.S.
1618.81	0.12369	0.202735	0.610105	0.541792	0.99919	ATP6V0A2	N.S.
8.44031	0.0224783	1.82272	0.0123323	0.99016	0.99919	ATP6V0A4	N.S.
7255.62	0.244181	0.198521	1.23	0.218697	0.915758	ATP6V0B	N.S.
22770.1	0.0947834	0.184207	0.514549	0.606868	0.99919	ATP6V0C	N.S.
8441.96	0.087494	0.175927	0.497331	0.618956	0.99919	ATP6V0D1	N.S.
4.40185	-5.6523	2.87334	-1.96716	0.0491653	0.514198	ATP6V0D2	N.S.
8454.92	0.056624	0.22747	0.248929	0.803416	0.99919	ATP6V0E1	N.S.
5231.17	0.413478	0.152515	2.71106	0.00670681	0.14772	ATP6V0E2	N.S.
6653.93	0.363161	0.178818	2.0309	0.042265	0.475747	ATP6V1A	N.S.
237.941	0.516009	0.385253	1.3394	0.18044	0.88214	ATP6V1B1	N.S.
4955.93	-0.153161	0.196205	-0.780617	0.435028	0.99919	ATP6V1B2	N.S.
13126.7	0.357809	0.145367	2.46142	0.0138387	0.24428	ATP6V1C1	N.S.
134.594	-0.887106	0.541705	-1.63762	0.101501	0.719118	ATP6V1C2	N.S.
3284.51	0.039042	0.266337	0.146589	0.883457	0.99919	ATP6V1D	N.S.
7800.43	0.119368	0.1938	0.615933	0.537939	0.99919	ATP6V1E1	N.S.
495.679	0.20489	0.316509	0.647344	0.517409	0.99919	ATP6V1E2	N.S.
6498.85	0.115852	0.172901	0.670045	0.502829	0.99919	ATP6V1F	N.S.
6829.45	0.103483	0.165569	0.625011	0.531964	0.99919	ATP6V1G1	N.S.
17.359	0.250343	1.2283	0.203812	0.838501	0.99919	ATP6V1G2	N.S.
42.1606	-1.89858	3.30124	-0.575111	0.565216	0.99919	ATP6V1G2-DDX39B	N.S.
0	NA	NA	NA	NA	NA	ATP6V1G3	N.S.
6749.16	0.235695	0.166743	1.41352	0.157502	0.841824	ATP6V1H	N.S.
1347.03	0.17605	0.249045	0.7069	0.479628	0.99919	ATP7A	N.S.
2083.77	0.124972	0.196806	0.635001	0.525428	0.99919	ATP7B	N.S.
442.042	-0.144289	0.403911	-0.35723	0.720919	0.99919	ATP8A1	N.S.
224.567	-1.25076	0.37141	-3.36759	0.000758273	0.0286914	ATP8A2	padj<0.05 & Downregulated
828.486	-1.20605	0.218053	-5.53099	3.18431e-08	4.6131e-06	ATP8B1	padj<0.05 & Downregulated
10985.3	-0.0586225	0.186011	-0.315156	0.752643	0.99919	ATP8B2	N.S.
377.94	-0.700307	0.347514	-2.01519	0.0438848	0.486192	ATP8B3	N.S.
0.296916	-1.71441	4.9772	-0.344453	0.730506	NA	ATP8B4	N.S.
4110.97	-0.219472	0.245344	-0.89455	0.371028	0.99919	ATP9A	N.S.
786.685	0.0976908	0.218734	0.446619	0.65515	0.99919	ATP9B	N.S.
3430.5	0.27892	0.170817	1.63286	0.102498	0.721309	ATPAF1	N.S.
1598.14	0.494449	0.223695	2.21038	0.027079	0.364842	ATPAF2	N.S.
2850.16	0.174553	0.167454	1.04239	0.297229	0.966125	ATPIF1	N.S.
1513.53	0.23997	0.306863	0.782009	0.434209	0.99919	ATR	N.S.
3174.25	0.108509	0.163542	0.663493	0.507015	0.99919	ATRAID	N.S.
836.552	0.149561	0.22411	0.667355	0.504546	0.99919	ATRIP	N.S.
6772.26	0.101116	0.164333	0.615309	0.538351	0.99919	ATRN	N.S.
65.1845	0.811349	0.757838	1.07061	0.284345	0.960204	ATRNL1	N.S.
3972.4	-0.447027	0.225078	-1.9861	0.0470223	0.503562	ATRX	N.S.
3.53263	0.695624	2.70602	0.257065	0.797128	NA	ATXN1	N.S.
6550.53	-0.0431643	0.161998	-0.266451	0.789892	0.99919	ATXN10	N.S.
4435.61	-0.245201	0.159301	-1.53924	0.123747	0.769869	ATXN1L	N.S.
3695.6	0.264088	0.172355	1.53223	0.125465	0.775329	ATXN2	N.S.
12995	0.0621998	0.156314	0.397917	0.690692	0.99919	ATXN2L	N.S.
1307.87	-0.195228	0.215466	-0.906072	0.364898	0.99919	ATXN3	N.S.
0	NA	NA	NA	NA	NA	ATXN3L	N.S.
1192.72	-0.33567	0.230084	-1.4589	0.144592	0.817468	ATXN7	N.S.
388.995	0.0845591	0.302721	0.27933	0.779992	0.99919	ATXN7L1	N.S.
532.644	0.292754	0.250087	1.17061	0.241755	0.93625	ATXN7L2	N.S.
7936.48	-0.108031	0.15151	-0.713027	0.475829	0.99919	ATXN7L3	N.S.
8404.89	0.108635	0.155388	0.699122	0.484476	0.99919	ATXN7L3B	N.S.
489.629	0.196744	0.259358	0.758583	0.448102	0.99919	AUH	N.S.
191.57	0.253217	0.367996	0.688098	0.491391	0.99919	AUNIP	N.S.
9815.43	-0.00754245	0.16289	-0.046304	0.963068	0.99919	AUP1	N.S.
604.657	0.0141747	0.243775	0.0581465	0.953632	0.99919	AURKA	N.S.
4863.4	-0.027534	0.1716	-0.160454	0.872523	0.99919	AURKAIP1	N.S.
210.335	0.145944	0.481205	0.303289	0.76167	0.99919	AURKB	N.S.
15.4178	0.0521763	1.20511	0.043296	0.965466	0.99919	AURKC	N.S.
846.926	-0.571429	0.257697	-2.21745	0.0265927	0.362019	AUTS2	N.S.
400.011	-0.265382	0.301623	-0.879848	0.378942	0.99919	AVEN	N.S.
37.8015	0.259241	0.769766	0.336779	0.736283	0.99919	AVIL	N.S.
2460.34	-0.347143	0.186999	-1.85639	0.0633976	0.580629	AVL9	N.S.
0	NA	NA	NA	NA	NA	AVP	N.S.
1164.03	-0.160555	0.202073	-0.794541	0.42688	0.99919	AVPI1	N.S.
0.646861	2.75264	4.86389	0.565934	0.571439	NA	AVPR1A	N.S.
0	NA	NA	NA	NA	NA	AVPR1B	N.S.
16.2041	0.720531	1.20523	0.597838	0.549948	0.99919	AVPR2	N.S.
0	NA	NA	NA	NA	NA	AWAT1	N.S.
0	NA	NA	NA	NA	NA	AWAT2	N.S.
8.08842	2.01081	1.94009	1.03645	0.299992	0.968143	AXDND1	N.S.
1992.72	-0.237817	0.187449	-1.2687	0.204548	0.904707	AXIN1	N.S.
592.937	-0.000593404	0.263435	-0.00225257	0.998203	0.999292	AXIN2	N.S.
264.65	-2.17862	0.347199	-6.27484	3.49993e-10	7.1734e-08	AXL	padj<0.05 & Downregulated
0.802769	-0.584141	4.87458	-0.119834	0.904614	NA	AZGP1	N.S.
2980.51	0.308309	0.166804	1.84833	0.0645545	0.587256	AZI2	N.S.
12203.2	0.0359385	0.16226	0.221487	0.824713	0.99919	AZIN1	N.S.
422.623	-0.115204	0.273769	-0.420809	0.673894	0.99919	AZIN2	N.S.
67.9021	0.322452	0.885708	0.364062	0.715812	0.99919	AZU1	N.S.
32330.8	-0.460932	0.240368	-1.91761	0.0551604	0.545213	B2M	N.S.
0.478254	2.30603	4.89227	0.471362	0.637382	NA	B3GALNT1	N.S.
860.107	0.0124021	0.239288	0.0518291	0.958665	0.99919	B3GALNT2	N.S.
776.467	-0.0752036	0.299514	-0.251086	0.801748	0.99919	B3GALT1	N.S.
3048.03	0.00300171	0.333525	0.00899996	0.992819	0.999292	B3GALT2	N.S.
74.0743	0.0872234	0.580024	0.150379	0.880466	0.99919	B3GALT4	N.S.
2.21779	-0.632858	3.24754	-0.194873	0.845492	NA	B3GALT5	N.S.
3068.11	0.121072	0.207525	0.583412	0.559616	0.99919	B3GALT6	N.S.
34.3481	1.20371	0.914008	1.31696	0.187853	0.892263	B3GAT1	N.S.
79.7298	-0.30978	0.588125	-0.526725	0.598385	0.99919	B3GAT2	N.S.
3606.25	0.139329	0.166702	0.835798	0.403269	0.99919	B3GAT3	N.S.
752.032	-0.107312	0.224734	-0.477509	0.633	0.99919	B3GLCT	N.S.
2423.83	0.0627802	0.186855	0.335984	0.736883	0.99919	B3GNT2	N.S.
0.890748	-3.33689	4.84931	-0.688116	0.49138	NA	B3GNT3	N.S.
465.945	0.123383	0.305645	0.403681	0.686447	0.99919	B3GNT4	N.S.
263.38	-0.750928	0.331422	-2.26577	0.0234652	0.338491	B3GNT5	N.S.
1.83843	4.24627	4.81301	0.88225	0.377642	NA	B3GNT6	N.S.
4.89499	0.903471	2.11359	0.427457	0.669046	0.99919	B3GNT7	N.S.
19.6766	-2.44706	1.50903	-1.62161	0.104887	0.729069	B3GNT8	N.S.
112.723	0.302632	0.469007	0.645263	0.518757	0.99919	B3GNT9	N.S.
294.896	0.143283	0.445008	0.321978	0.747469	0.99919	B3GNTL1	N.S.
5207.46	-0.0197639	0.223105	-0.0885858	0.929411	0.99919	B4GALNT1	N.S.
0	NA	NA	NA	NA	NA	B4GALNT2	N.S.
369.572	-0.621342	0.323665	-1.91971	0.0548951	0.544826	B4GALNT3	N.S.
4700.06	-0.17979	0.775964	-0.231699	0.816772	0.99919	B4GALNT4	N.S.
4784.19	-0.376671	0.165132	-2.28103	0.0225469	0.331398	B4GALT1	N.S.
4459.74	0.0209937	0.168724	0.124426	0.900978	0.99919	B4GALT2	N.S.
4298.48	0.408876	0.158292	2.58305	0.00979299	0.195027	B4GALT3	N.S.
1124.16	0.309733	0.218355	1.41848	0.15605	0.839224	B4GALT4	N.S.
2655.95	-0.440372	0.180893	-2.43443	0.0149152	0.256018	B4GALT5	N.S.
660.434	0.182312	0.268808	0.678224	0.49763	0.99919	B4GALT6	N.S.
1469.72	0.314652	0.195688	1.60793	0.10785	0.735948	B4GALT7	N.S.
2950.58	0.35794	0.203235	1.76121	0.0782025	0.645253	B4GAT1	N.S.
378.126	0.295851	0.305377	0.968805	0.332643	0.987004	B9D1	N.S.
176.817	-0.586225	0.445638	-1.31547	0.188351	0.892263	B9D2	N.S.
0.822947	-1.42427	4.87163	-0.29236	0.770012	NA	BAALC	N.S.
3.41374	0.735848	2.3485	0.313327	0.754032	NA	BAAT	N.S.
3393.37	-0.0163523	0.166806	-0.0980319	0.921907	0.99919	BABAM1	N.S.
3237.48	-0.0311305	0.195702	-0.159071	0.873613	0.99919	BACE1	N.S.
1391.55	-0.461357	0.213629	-2.15961	0.0308026	0.394195	BACE2	N.S.
2251.19	-0.165155	0.200289	-0.82458	0.40961	0.99919	BACH1	N.S.
23.4766	1.0653	0.990773	1.07522	0.282276	0.960204	BACH2	N.S.
2608.3	0.50777	0.188943	2.68743	0.00720046	0.155435	BAD	N.S.
3908.88	0.161242	0.234076	0.688844	0.490921	0.99919	BAG1	N.S.
1538.56	0.0806493	0.19328	0.417267	0.676483	0.99919	BAG2	N.S.
8509.33	-0.245276	0.279368	-0.877967	0.379962	0.99919	BAG3	N.S.
1326.29	0.343744	0.225661	1.52328	0.127689	0.783493	BAG4	N.S.
2213.85	-0.299867	0.173329	-1.73004	0.0836229	0.665333	BAG5	N.S.
13219.9	0.00196166	0.155941	0.0125795	0.989963	0.99919	BAG6	N.S.
0	NA	NA	NA	NA	NA	BAGE5	N.S.
2158.56	0.215417	0.2274	0.947303	0.343485	0.993437	BAHCC1	N.S.
3221.6	-0.146099	0.188501	-0.775059	0.438305	0.99919	BAHD1	N.S.
5121.22	-0.449702	0.166461	-2.70155	0.00690181	0.151113	BAIAP2	N.S.
2893.34	-0.150736	0.181276	-0.83153	0.405674	0.99919	BAIAP2L1	N.S.
32.4811	0.415957	0.878014	0.473747	0.63568	0.99919	BAIAP2L2	N.S.
477.21	-0.246963	0.481186	-0.513238	0.607785	0.99919	BAIAP3	N.S.
5139.8	-0.199056	0.220441	-0.902993	0.36653	0.99919	BAK1	N.S.
151.336	-0.17059	0.711906	-0.239624	0.810622	0.99919	BAMBI	N.S.
7823.41	0.0298001	0.200529	0.148607	0.881864	0.99919	BANF1	N.S.
0	NA	NA	NA	NA	NA	BANF2	N.S.
5.34432	-1.69022	2.45902	-0.687357	0.491857	0.99919	BANK1	N.S.
909.419	0.155252	0.35388	0.438713	0.66087	0.99919	BANP	N.S.
10030.2	-0.0590115	0.155785	-0.378802	0.704835	0.99919	BAP1	N.S.
451.208	-0.157551	0.365212	-0.431395	0.666181	0.99919	BARD1	N.S.
0.787897	3.01934	4.85063	0.622463	0.533638	NA	BARHL1	N.S.
131.45	0.303233	0.439841	0.689414	0.490563	0.99919	BARHL2	N.S.
5796.93	-0.124891	0.163323	-0.764692	0.444455	0.99919	BARX1	N.S.
7.4644	-0.824665	1.66035	-0.496682	0.619413	0.99919	BARX2	N.S.
93.4329	-1.42822	0.678807	-2.10402	0.0353766	0.428263	BASP1	N.S.
0	NA	NA	NA	NA	NA	BATF	N.S.
1465.37	-0.910897	0.316597	-2.87715	0.00401281	0.101226	BATF2	N.S.
347.698	0.176676	0.354789	0.497975	0.618502	0.99919	BATF3	N.S.
11309.2	0.16405	0.148388	1.10554	0.268924	0.949192	BAX	N.S.
2569.79	-0.125024	0.177404	-0.70474	0.480972	0.99919	BAZ1A	N.S.
5525.35	-0.0151433	0.166895	-0.0907354	0.927703	0.99919	BAZ1B	N.S.
8208.13	-0.136166	0.150738	-0.903325	0.366353	0.99919	BAZ2A	N.S.
1434.76	-0.581688	0.226668	-2.56626	0.0102802	0.200933	BAZ2B	N.S.
5026.68	-0.129666	0.170549	-0.760282	0.447086	0.99919	BBC3	N.S.
388.568	0.105855	0.279923	0.378158	0.705313	0.99919	BBIP1	N.S.
209.598	-0.0578299	0.361904	-0.159794	0.873043	0.99919	BBOF1	N.S.
6.04513	1.35876	1.97051	0.689548	0.490479	0.99919	BBOX1	N.S.
1462.99	0.133475	0.271519	0.491586	0.623012	0.99919	BBS1	N.S.
1025.86	0.0595844	0.204841	0.290882	0.771142	0.99919	BBS10	N.S.
500.574	-0.0301905	0.283903	-0.106341	0.915312	0.99919	BBS12	N.S.
2450	-0.0778656	0.188004	-0.414169	0.67875	0.99919	BBS2	N.S.
1607.06	0.0316315	0.188118	0.168147	0.866468	0.99919	BBS4	N.S.
1425.46	0.313856	0.186673	1.68131	0.0927023	0.693225	BBS5	N.S.
1215.4	-0.0538764	0.203405	-0.264873	0.791108	0.99919	BBS7	N.S.
951.31	0.146624	0.213761	0.685924	0.492761	0.99919	BBS9	N.S.
3602.9	0.137873	0.177793	0.775468	0.438063	0.99919	BBX	N.S.
4575.71	-0.0332147	0.163914	-0.202635	0.83942	0.99919	BCAM	N.S.
46.3593	1.13171	0.949971	1.19131	0.233532	0.932169	BCAN	N.S.
2342.19	-0.0230825	0.175441	-0.131568	0.895326	0.99919	BCAP29	N.S.
17399.7	-0.0256743	0.204806	-0.125359	0.900239	0.99919	BCAP31	N.S.
7882.03	0.00434916	0.21966	0.0197995	0.984203	0.99919	BCAR1	N.S.
755.34	-0.61372	0.233349	-2.63006	0.00853702	0.177188	BCAR3	N.S.
11.8715	1.05585	1.39129	0.758901	0.447912	0.99919	BCAS1	N.S.
1815.21	0.0986355	0.285333	0.345685	0.729579	0.99919	BCAS2	N.S.
1804.46	0.207809	0.184951	1.12359	0.261188	0.944118	BCAS3	N.S.
628.456	0.403433	0.261336	1.54374	0.122652	0.768105	BCAS4	N.S.
8.92845	1.2369	2.28574	0.54114	0.588411	0.99919	BCAT1	N.S.
3181	0.31599	0.190472	1.65899	0.0971187	0.705652	BCAT2	N.S.
3653.08	0.291103	0.197103	1.47691	0.139701	0.808838	BCCIP	N.S.
528.839	0.161238	0.256138	0.629495	0.529025	0.99919	BCDIN3D	N.S.
77.6768	0.786012	0.576951	1.36235	0.173086	0.870606	BCHE	N.S.
1206.18	0.100081	0.1957	0.5114	0.609071	0.99919	BCKDHA	N.S.
709.974	-0.037757	0.27131	-0.139166	0.889319	0.99919	BCKDHB	N.S.
1745.88	-0.131274	0.187107	-0.701599	0.482929	0.99919	BCKDK	N.S.
1020.19	-0.130764	0.202949	-0.644319	0.519368	0.99919	BCL10	N.S.
11.2588	2.70326	1.86583	1.44882	0.147387	0.82185	BCL11A	N.S.
10.5844	1.05863	2.05573	0.514965	0.606578	0.99919	BCL11B	N.S.
28.8306	-0.612071	0.886768	-0.690227	0.490052	0.99919	BCL2	N.S.
8.02634	-3.4117	2.03108	-1.67974	0.093007	0.693646	BCL2A1	N.S.
7347.12	-0.80691	0.15891	-5.07778	3.8187e-07	4.30172e-05	BCL2L1	padj<0.05 & Downregulated
6.28192	0.850458	1.92572	0.441631	0.658757	0.99919	BCL2L10	N.S.
976.877	-0.0283012	0.223995	-0.126348	0.899457	0.99919	BCL2L11	N.S.
1923.04	0.381109	0.189116	2.01521	0.0438823	0.486192	BCL2L12	N.S.
3224.82	-0.353349	0.202959	-1.74098	0.0816866	0.65929	BCL2L13	N.S.
1.89045	-2.6888	4.1976	-0.640558	0.52181	NA	BCL2L14	N.S.
10.6087	1.75317	1.53434	1.14263	0.253193	0.941808	BCL2L15	N.S.
1438.09	-0.00768943	0.289423	-0.0265682	0.978804	0.99919	BCL2L2	N.S.
494.285	0.195266	0.317898	0.614239	0.539058	0.99919	BCL2L2-PABPN1	N.S.
1087.38	-0.327857	0.22137	-1.48103	0.138598	0.806818	BCL3	N.S.
512.971	-0.28105	0.347582	-0.808587	0.418753	0.99919	BCL6	N.S.
3.64293	-0.846582	2.67996	-0.315893	0.752084	NA	BCL6B	N.S.
2053.16	-0.0101979	0.182686	-0.0558224	0.955483	0.99919	BCL7A	N.S.
2846.42	0.0510194	0.174305	0.292702	0.76975	0.99919	BCL7B	N.S.
4178.11	0.0555332	0.189363	0.293263	0.769321	0.99919	BCL7C	N.S.
3768.51	-0.184192	0.225113	-0.818224	0.413229	0.99919	BCL9	N.S.
5362.06	-0.66798	0.182554	-3.65907	0.000253127	0.0116731	BCL9L	padj<0.05 & Downregulated
8101.89	0.0226146	0.166052	0.13619	0.891671	0.99919	BCLAF1	N.S.
0	NA	NA	NA	NA	NA	BCO1	N.S.
41.6422	-0.648873	0.770983	-0.841618	0.400002	0.99919	BCO2	N.S.
3121.88	0.172247	0.165459	1.04103	0.297863	0.966696	BCOR	N.S.
4663.45	0.182683	0.162537	1.12395	0.261036	0.944118	BCORL1	N.S.
7342.86	-0.140068	0.154011	-0.909465	0.363105	0.99919	BCR	N.S.
1393.42	0.246529	0.189097	1.30371	0.192331	0.898017	BCS1L	N.S.
3.76433	-0.379201	2.43689	-0.155608	0.876342	NA	BDH1	N.S.
512.699	0.162532	0.330339	0.492017	0.622707	0.99919	BDH2	N.S.
5.74201	-6.02322	2.71852	-2.21563	0.0267169	0.362373	BDKRB1	N.S.
9.80047	-2.30985	1.58327	-1.45891	0.14459	0.817468	BDKRB2	N.S.
160.138	-0.669802	0.497924	-1.34519	0.178564	0.879236	BDNF	N.S.
2315.71	-0.0402751	0.199703	-0.201675	0.840171	0.99919	BDP1	N.S.
151.544	-0.564423	0.467604	-1.20705	0.227411	0.924332	BEAN1	N.S.
4303.93	-0.0224288	0.160039	-0.140146	0.888545	0.99919	BECN1	N.S.
0	NA	NA	NA	NA	NA	BECN2	N.S.
371.984	-0.0617534	0.398598	-0.154926	0.876879	0.99919	BEGAIN	N.S.
0.431241	2.17199	4.9026	0.443027	0.657746	NA	BEND2	N.S.
740.766	-0.0679699	0.236565	-0.287321	0.773867	0.99919	BEND3	N.S.
1495.54	0.0375477	0.192562	0.194991	0.8454	0.99919	BEND4	N.S.
1.7456	-0.569716	3.57602	-0.159315	0.87342	NA	BEND5	N.S.
220.174	0.0196756	0.482761	0.0407563	0.96749	0.99919	BEND6	N.S.
1175.03	-0.110059	0.211122	-0.521305	0.602155	0.99919	BEND7	N.S.
170.362	-0.325201	0.562556	-0.578079	0.563211	0.99919	BEST1	N.S.
4.96009	1.61474	2.44228	0.66116	0.50851	0.99919	BEST2	N.S.
0	NA	NA	NA	NA	NA	BEST3	N.S.
4.42277	-2.41019	2.30202	-1.04699	0.295104	0.964328	BEST4	N.S.
1139.49	0.1334	0.229279	0.581823	0.560686	0.99919	BET1	N.S.
5681.59	0.653891	0.184147	3.55092	0.000383891	0.016662	BET1L	padj<0.05 & Upregulated
0.262632	1.40389	4.98093	0.281853	0.778056	NA	BEX1	N.S.
148.859	-0.223174	0.585115	-0.381419	0.702892	0.99919	BEX2	N.S.
1633.19	0.0154979	0.284325	0.0545077	0.956531	0.99919	BEX4	N.S.
0	NA	NA	NA	NA	NA	BEX5	N.S.
4329.25	-0.0970703	0.163651	-0.593153	0.553079	0.99919	BFAR	N.S.
8.58148	-0.897778	1.57236	-0.570976	0.568016	0.99919	BFSP1	N.S.
0	NA	NA	NA	NA	NA	BFSP2	N.S.
5.36377	-1.23723	2.0477	-0.604205	0.545707	0.99919	BGLAP	N.S.
673.447	3.23801	0.97862	3.30875	0.000937145	0.0334854	BGN	padj<0.05 & Upregulated
52.189	0.237396	0.728566	0.32584	0.744545	0.99919	BHLHA15	N.S.
0.890748	-3.33689	4.84931	-0.688116	0.49138	NA	BHLHA9	N.S.
1473.83	0.131862	0.187179	0.704469	0.481141	0.99919	BHLHB9	N.S.
1.30046	1.81376	4.09221	0.443224	0.657604	NA	BHLHE22	N.S.
0	NA	NA	NA	NA	NA	BHLHE23	N.S.
5249.69	-0.922704	0.177423	-5.20058	1.9867e-07	2.36433e-05	BHLHE40	padj<0.05 & Downregulated
41.2436	-0.357814	0.753929	-0.4746	0.635072	0.99919	BHLHE41	N.S.
0.862482	3.16539	4.84433	0.653422	0.513484	NA	BHMG1	N.S.
1.80103	2.13572	4.27207	0.499926	0.617127	NA	BHMT	N.S.
1.15948	1.59367	4.8234	0.330403	0.741095	NA	BHMT2	N.S.
11.5142	1.16556	1.51156	0.771099	0.440648	0.99919	BICC1	N.S.
726.167	-0.273807	0.229675	-1.19215	0.233203	0.931739	BICD1	N.S.
4377.24	-0.00745782	0.160334	-0.0465143	0.9629	0.99919	BICD2	N.S.
1816.04	0.0117441	0.179838	0.0653039	0.947932	0.99919	BID	N.S.
215.847	-0.79596	0.391515	-2.03303	0.0420499	0.474573	BIK	N.S.
3283.93	-0.113188	0.162663	-0.695847	0.486525	0.99919	BIN1	N.S.
5.36648	-0.59081	2.40949	-0.245202	0.8063	0.99919	BIN2	N.S.
730.647	-0.297235	0.259083	-1.14726	0.251276	0.941763	BIN3	N.S.
3735.73	-0.299138	0.166897	-1.79235	0.0730773	0.625118	BIRC2	N.S.
376.346	-0.756004	0.372755	-2.02815	0.0425448	0.477139	BIRC3	N.S.
913.781	0.456317	0.294464	1.54965	0.121224	0.767077	BIRC5	N.S.
6939.3	-0.073619	0.192183	-0.383067	0.70167	0.99919	BIRC6	N.S.
10.7416	2.63327	1.7674	1.48991	0.136247	0.802315	BIRC7	N.S.
0	NA	NA	NA	NA	NA	BIRC8	N.S.
1512.93	0.212548	0.209569	1.01421	0.310481	0.973078	BIVM	N.S.
546.037	-0.690521	0.306812	-2.25063	0.0244089	0.346348	BIVM-ERCC5	N.S.
0	NA	NA	NA	NA	NA	BLACE	N.S.
1895.03	0.0526195	0.17794	0.295714	0.767448	0.99919	BLCAP	N.S.
0	NA	NA	NA	NA	NA	BLID	N.S.
19.1987	1.12537	1.34902	0.834213	0.404161	0.99919	BLK	N.S.
245.023	-0.0249491	0.354079	-0.070462	0.943826	0.99919	BLM	N.S.
5690.16	0.296367	0.160766	1.84347	0.0652601	0.590996	BLMH	N.S.
38.4064	-0.491363	0.78948	-0.622389	0.533686	0.99919	BLNK	N.S.
1571.87	0.214836	0.20362	1.05508	0.291387	0.961109	BLOC1S1	N.S.
3826.47	0.173267	0.178674	0.969738	0.332177	0.987004	BLOC1S2	N.S.
1795.34	0.328265	0.309308	1.06129	0.288559	0.960718	BLOC1S3	N.S.
1824.22	-0.000346147	0.178552	-0.00193863	0.998453	0.999292	BLOC1S4	N.S.
968.297	-0.083411	0.21213	-0.393206	0.694167	0.99919	BLOC1S5	N.S.
0	NA	NA	NA	NA	NA	BLOC1S5-TXNDC5	N.S.
3578.3	-0.210378	0.16522	-1.27332	0.202903	0.903743	BLOC1S6	N.S.
2068.21	-0.0559171	0.172828	-0.323543	0.746284	0.99919	BLVRA	N.S.
8768.6	0.0454035	0.175037	0.259394	0.795331	0.99919	BLVRB	N.S.
2190.81	0.0182805	0.185143	0.098737	0.921347	0.99919	BLZF1	N.S.
509.633	-0.19265	0.276364	-0.697088	0.485748	0.99919	BMF	N.S.
3506.98	0.058319	0.18321	0.318318	0.750244	0.99919	BMI1	N.S.
4799.57	-0.725142	0.189243	-3.8318	0.000127207	0.00665673	BMP1	padj<0.05 & Downregulated
0	NA	NA	NA	NA	NA	BMP10	N.S.
0	NA	NA	NA	NA	NA	BMP15	N.S.
295.808	0.182713	0.439926	0.415328	0.677902	0.99919	BMP2	N.S.
805.473	0.202612	0.226588	0.894186	0.371222	0.99919	BMP2K	N.S.
64.383	0.177321	0.729699	0.243005	0.808001	0.99919	BMP3	N.S.
317.034	0.573239	0.307266	1.86561	0.0620959	0.576882	BMP4	N.S.
0	NA	NA	NA	NA	NA	BMP5	N.S.
9.74839	-2.21214	1.56201	-1.41621	0.156713	0.840952	BMP6	N.S.
4009.91	0.128533	0.184035	0.698419	0.484915	0.99919	BMP7	N.S.
106.75	0.153511	0.571746	0.268494	0.788319	0.99919	BMP8A	N.S.
1251.13	-0.569249	0.222874	-2.55413	0.0106454	0.206191	BMP8B	N.S.
26.6347	-0.546952	1.13389	-0.482369	0.629544	0.99919	BMPER	N.S.
4163.2	-0.178025	0.209295	-0.850593	0.394995	0.99919	BMPR1A	N.S.
3544.03	0.110619	0.329457	0.335763	0.73705	0.99919	BMPR1B	N.S.
8510.31	0.0812445	0.153233	0.530202	0.595972	0.99919	BMPR2	N.S.
4425.21	-0.0675398	0.163786	-0.412367	0.680071	0.99919	BMS1	N.S.
36.3999	4.3476	1.14055	3.81186	0.000137927	0.00711674	BMX	padj<0.05 & Upregulated
3.53491	0.700044	2.89034	0.242201	0.808624	NA	BNC1	N.S.
13.5856	-1.7316	1.46164	-1.18469	0.23614	0.935281	BNC2	N.S.
865.192	0.201493	0.241968	0.832727	0.404999	0.99919	BNIP1	N.S.
3492.26	-0.148423	0.160573	-0.924329	0.355315	0.99919	BNIP2	N.S.
4857.88	-0.0266365	0.161241	-0.165197	0.868789	0.99919	BNIP3	N.S.
5239.11	-0.250115	0.169402	-1.47646	0.139822	0.808838	BNIP3L	N.S.
82.26	0.115565	0.686774	0.168273	0.866369	0.99919	BNIPL	N.S.
480.183	0.000671951	0.293598	0.00228868	0.998174	0.999292	BOC	N.S.
3693.8	0.156292	0.163112	0.958183	0.337971	0.98901	BOD1	N.S.
3954.38	-0.0996775	0.162159	-0.614688	0.538761	0.99919	BOD1L1	N.S.
0.262632	1.40389	4.98093	0.281853	0.778056	NA	BOD1L2	N.S.
2992.12	-0.249251	0.174143	-1.4313	0.152344	0.833853	BOK	N.S.
1090.5	0.349896	0.221294	1.58114	0.113847	0.753381	BOLA1	N.S.
588.25	0.00369991	0.246913	0.0149847	0.988044	0.99919	BOLA2	N.S.
500.112	0.00101635	0.28159	0.00360933	0.99712	0.999292	BOLA2B	N.S.
1121.25	0.440585	0.244839	1.79949	0.0719416	0.620844	BOLA3	N.S.
2.92335	0.108948	3.02396	0.0360282	0.97126	NA	BOLL	N.S.
5709.56	-0.0266667	0.188677	-0.141336	0.887605	0.99919	BOP1	N.S.
239.041	0.160399	0.347892	0.46106	0.644755	0.99919	BORA	N.S.
603.193	-0.271161	0.244482	-1.10912	0.267377	0.948297	BORCS5	N.S.
2396.46	-0.0494409	0.19763	-0.250169	0.802457	0.99919	BORCS6	N.S.
1128.73	-0.040037	0.206834	-0.193571	0.846512	0.99919	BORCS7	N.S.
1.57579	4.0233	4.81771	0.835106	0.403658	NA	BORCS7-ASMT	N.S.
908.388	0.20261	0.258133	0.784906	0.432509	0.99919	BORCS8	N.S.
332.421	-0.378026	0.329202	-1.14831	0.250841	0.941763	BORCS8-MEF2B	N.S.
1129.84	0.181545	0.219367	0.827587	0.407905	0.99919	BPGM	N.S.
1285.51	0.259092	0.26568	0.975203	0.32946	0.987004	BPHL	N.S.
0.296916	-1.71441	4.9772	-0.344453	0.730506	NA	BPI	N.S.
2.12863	4.46145	3.78795	1.1778	0.238877	NA	BPIFA1	N.S.
1.85857	-4.41277	4.8155	-0.91637	0.359473	NA	BPIFA2	N.S.
0	NA	NA	NA	NA	NA	BPIFA3	N.S.
17.1229	0.28664	1.19038	0.240796	0.809713	0.99919	BPIFB1	N.S.
0	NA	NA	NA	NA	NA	BPIFB2	N.S.
0	NA	NA	NA	NA	NA	BPIFB3	N.S.
0.232321	-1.53534	4.98862	-0.307769	0.758258	NA	BPIFB4	N.S.
0	NA	NA	NA	NA	NA	BPIFB6	N.S.
0	NA	NA	NA	NA	NA	BPIFC	N.S.
3199.4	0.434307	0.181796	2.38898	0.0168953	0.277334	BPNT1	N.S.
7446.4	0.17157	0.148851	1.15263	0.249063	0.940049	BPTF	N.S.
0	NA	NA	NA	NA	NA	BPY2	N.S.
0	NA	NA	NA	NA	NA	BPY2B	N.S.
0	NA	NA	NA	NA	NA	BPY2C	N.S.
1281.07	0.0685202	0.195788	0.34997	0.726361	0.99919	BRAF	N.S.
2184.1	-0.142377	0.237503	-0.599473	0.548857	0.99919	BRAP	N.S.
5200.16	0.0926392	0.180468	0.513329	0.607722	0.99919	BRAT1	N.S.
1101.9	0.0418572	0.259115	0.161539	0.871669	0.99919	BRCA1	N.S.
519.263	0.293662	0.315312	0.931337	0.351679	0.996107	BRCA2	N.S.
881.857	-0.0726444	0.223884	-0.324473	0.74558	0.99919	BRCC3	N.S.
2482.79	0.0170504	0.176619	0.0965382	0.923093	0.99919	BRD1	N.S.
22768.6	-0.184116	0.222659	-0.826895	0.408296	0.99919	BRD2	N.S.
4600.16	0.00211848	0.15623	0.01356	0.989181	0.99919	BRD3	N.S.
10163.6	0.0266826	0.175177	0.152317	0.878937	0.99919	BRD4	N.S.
4730.03	0.259848	0.196064	1.32533	0.185063	0.890145	BRD7	N.S.
4273.42	0.184871	0.173422	1.06602	0.286413	0.960204	BRD8	N.S.
2150.58	-0.3021	0.186185	-1.62258	0.104678	0.728788	BRD9	N.S.
0	NA	NA	NA	NA	NA	BRDT	N.S.
1631.14	-0.070146	0.187175	-0.374761	0.707838	0.99919	BRE	N.S.
3606.76	-0.102618	0.188099	-0.545552	0.585374	0.99919	BRF1	N.S.
1738.55	0.0656655	0.284303	0.23097	0.817338	0.99919	BRF2	N.S.
9496.59	-0.0137761	0.173961	-0.0791909	0.936881	0.99919	BRI3	N.S.
1834.55	0.239391	0.2066	1.15872	0.246571	0.93852	BRI3BP	N.S.
99.1769	-0.281719	0.525692	-0.535901	0.592027	0.99919	BRICD5	N.S.
22.4961	-0.736688	1.00693	-0.731619	0.464401	0.99919	BRINP1	N.S.
0	NA	NA	NA	NA	NA	BRINP2	N.S.
0	NA	NA	NA	NA	NA	BRINP3	N.S.
239.264	0.0900493	0.467666	0.192551	0.847311	0.99919	BRIP1	N.S.
2101.65	0.257899	0.244071	1.05665	0.29067	0.960718	BRIX1	N.S.
7060.83	0.0557583	0.153801	0.362535	0.716952	0.99919	BRK1	N.S.
3006.3	0.0175428	0.278994	0.0628788	0.949863	0.99919	BRMS1	N.S.
968.059	0.0494346	0.206507	0.239385	0.810807	0.99919	BRMS1L	N.S.
4345.3	0.0323742	0.162687	0.198997	0.842265	0.99919	BROX	N.S.
2383.32	0.0192621	0.184755	0.104258	0.916965	0.99919	BRPF1	N.S.
3813.7	-0.0872863	0.212272	-0.411201	0.680925	0.99919	BRPF3	N.S.
0	NA	NA	NA	NA	NA	BRS3	N.S.
1090.64	0.643018	0.381793	1.68421	0.0921418	0.691771	BRSK1	N.S.
1731.44	-0.297097	0.291372	-1.01965	0.307896	0.972635	BRSK2	N.S.
1745.71	-0.0397022	0.187256	-0.212021	0.832091	0.99919	BRWD1	N.S.
1445.41	0.153285	0.229048	0.669228	0.50335	0.99919	BRWD3	N.S.
1008.34	0.44098	0.263368	1.67439	0.0940547	0.694677	BSCL2	N.S.
5313.37	-0.27967	0.160173	-1.74605	0.0808026	0.654089	BSDC1	N.S.
23977	0.0577691	0.199716	0.289256	0.772386	0.99919	BSG	N.S.
742.693	-0.153563	0.293441	-0.523319	0.600752	0.99919	BSN	N.S.
0	NA	NA	NA	NA	NA	BSND	N.S.
0	NA	NA	NA	NA	NA	BSPH1	N.S.
85.8075	-0.687997	0.54704	-1.25767	0.208511	0.908739	BSPRY	N.S.
9.49952	0.508304	1.47195	0.345326	0.729849	0.99919	BST1	N.S.
5789.2	-0.572439	0.983756	-0.581891	0.56064	0.99919	BST2	N.S.
0	NA	NA	NA	NA	NA	BSX	N.S.
2284.05	5.14893e-05	0.18353	0.00028055	0.999776	0.999844	BTAF1	N.S.
5905.53	0.0567677	0.164417	0.345267	0.729894	0.99919	BTBD1	N.S.
2784.83	0.0343906	0.173111	0.198663	0.842527	0.99919	BTBD10	N.S.
28.2448	-0.13461	1.11578	-0.120642	0.903975	0.99919	BTBD11	N.S.
3.05005	-1.64161	2.63725	-0.62247	0.533633	NA	BTBD16	N.S.
0.296916	-1.71441	4.9772	-0.344453	0.730506	NA	BTBD17	N.S.
3.13064	-0.91569	2.83316	-0.323204	0.746541	NA	BTBD18	N.S.
95.8214	0.0111039	0.661035	0.0167977	0.986598	0.99919	BTBD19	N.S.
8437.51	0.00480464	0.153323	0.0313367	0.975001	0.99919	BTBD2	N.S.
6027.29	0.000583005	0.19091	0.00305381	0.997563	0.999292	BTBD3	N.S.
2.70692	0.9744	3.66461	0.265894	0.790321	NA	BTBD6	N.S.
2515.72	-0.085842	0.170585	-0.50322	0.614809	0.99919	BTBD7	N.S.
47.6309	-0.0614694	0.768617	-0.079974	0.936258	0.99919	BTBD8	N.S.
1921.39	-0.18446	0.211127	-0.873691	0.382286	0.99919	BTBD9	N.S.
1.73649	-3.5976	4.36014	-0.825112	0.409308	NA	BTC	N.S.
313.105	0.340319	0.317987	1.07023	0.284517	0.960204	BTD	N.S.
16264.7	0.141673	0.148236	0.955727	0.33921	0.990542	BTF3	N.S.
3025.36	0.150675	0.17622	0.855039	0.39253	0.99919	BTF3L4	N.S.
1202.62	-0.39352	0.254889	-1.54389	0.122616	0.768105	BTG1	N.S.
[truncated: 17,900 more rows]
