# Supplementary material for: Re-expression of SMARCA4/BRG1 in small cell carcinoma of ovary, hypercalcemic type (SCCOHT) promotes an epithelial-like gene signature through an AP-1-dependent mechanism
Source: eLife. 2020 Dec 23;9:e59073. doi: 10.7554/eLife.59073 (PMC7813545; doi:10.7554/eLife.59073)
Supplement: Supplementary file 4. — A. Table of DESeq2 Results for SCCOHT-1 cells +/- BRG1. B. Table of DESeq2 results for COV434 +/- BRG1 [file elife-59073-supp4.xlsx]

## Sheet: A. SCCOHT-1 RNAseq
baseMean	log2FoldChange	lfcSE	stat	pvalue	padj	Gene
1129.06	-0.611183	0.421993	-1.44832	0.147527	0.331815	A1BG
6.92332	-0.606685	1.32232	-0.458802	0.646377	0.814516	A1CF
46.2507	-0.0935057	0.921234	-0.1015	0.919153	0.96095	A2M
7.76029	-5.0143	1.37025	-3.6594	0.000252809	0.00173775	A2ML1
0	NA	NA	NA	NA	NA	A3GALT2
498.457	-0.0823459	0.2797	-0.294408	0.768446	0.88339	A4GALT
2.17584	3.46049	1.88826	1.83263	0.0668572	0.187571	A4GNT
2538.04	-0.358546	0.187678	-1.91044	0.056077	0.16439	AAAS
5481.28	-0.766903	0.156035	-4.91493	8.88124e-07	9.64034e-06	AACS
94.2265	0.722262	0.423855	1.70403	0.0883754	0.230116	AADAC
0	NA	NA	NA	NA	NA	AADACL2
0.346346	-1.93633	4.03598	-0.479767	0.631393	NA	AADACL3
0	NA	NA	NA	NA	NA	AADACL4
358.2	0.463749	0.256372	1.80889	0.070468	0.195332	AADAT
865.597	-0.162492	0.264478	-0.614389	0.538959	0.743203	AAED1
6159.65	-0.175232	0.164818	-1.06319	0.287698	0.508877	AAGAB
4754.91	0.304644	0.517615	0.588554	0.556161	0.756593	AAK1
387.784	-0.160559	0.476005	-0.337306	0.735886	0.863271	AAMDC
12358.6	-0.148598	0.177375	-0.837762	0.402164	0.625781	AAMP
3.63306	-1.75273	1.3861	-1.26451	0.206049	0.413895	AANAT
3757.71	-0.29408	0.257202	-1.14338	0.252881	0.469351	AAR2
3446.27	-1.58374	0.337659	-4.69035	2.72736e-06	2.7425e-05	AARD
14398	-0.0597122	0.16125	-0.370309	0.711152	0.851677	AARS
2550.47	0.157946	0.252813	0.624753	0.532133	0.736819	AARS2
1722.63	-0.0776385	0.366156	-0.212037	0.832078	0.916755	AARSD1
691.19	0.188434	0.269243	0.699864	0.484012	0.697338	AASDH
4098.27	-0.0240115	0.383766	-0.062568	0.95011	0.976543	AASDHPPT
5.3303	-0.933987	1.13614	-0.822068	0.411038	0.633554	AASS
6543.64	0.125467	0.21924	0.572283	0.56713	0.763721	AATF
426.06	-0.677125	0.317362	-2.13361	0.032875	0.109509	AATK
1215.36	1.08027	0.197653	5.46547	4.6167e-08	6.02848e-07	ABAT
30.4475	1.30583	0.530486	2.46158	0.0138327	0.0550337	ABC7-42404400C24.1
39.1152	2.75459	0.674438	4.08427	4.42157e-05	0.000358677	ABCA1
6.91119	-0.823737	1.61911	-0.508761	0.61092	0.792337	ABCA10
723.868	6.9757	0.37144	18.7802	1.09746e-78	6.30545e-76	ABCA12
1.05558	1.02214	2.70128	0.378389	0.705142	0.848216	ABCA13
10185.3	-0.145474	0.17723	-0.820818	0.41175	0.634181	ABCA2
7382.83	0.175795	0.233635	0.752435	0.45179	0.669845	ABCA3
507.324	5.14796	0.543636	9.46949	2.81214e-21	1.10509e-19	ABCA4
23.0699	-0.537954	0.587618	-0.915483	0.359938	0.5841	ABCA5
1.64493	2.05604	1.9693	1.04405	0.296464	0.518627	ABCA6
1399.85	-0.527866	0.251936	-2.09523	0.0361502	0.117643	ABCA7
3.26467	2.8853	1.87363	1.53995	0.123571	0.293047	ABCA8
4.23586	1.21868	1.13488	1.07384	0.282894	0.503749	ABCA9
443.926	0.271265	0.611439	0.44365	0.657296	0.821041	ABCB1
667.301	0.152929	0.316758	0.482794	0.629242	0.804049	ABCB10
1.7247	0.580746	1.7261	0.33645	0.736531	0.863623	ABCB11
1.60294	2.97523	2.05638	1.44683	0.147944	0.332216	ABCB4
0	NA	NA	NA	NA	NA	ABCB5
2092.89	-1.13197	0.409487	-2.76436	0.00570349	0.0261435	ABCB6
1528.61	-0.255585	0.204308	-1.25098	0.210943	0.41972	ABCB7
3149.16	0.0844168	0.174966	0.482475	0.629468	0.804049	ABCB8
925.279	0.229576	0.177706	1.29189	0.196396	0.401201	ABCB9
18935.8	0.499781	0.247718	2.01754	0.0436391	0.136087	ABCC1
1966.26	-0.0691118	0.269079	-0.256846	0.797298	0.898214	ABCC10
49.3645	0.0939372	0.489299	0.191983	0.847755	0.924403	ABCC11
0.163628	0.909069	4.08047	0.222785	0.823703	NA	ABCC12
90.2854	0.773603	0.349778	2.2117	0.0269876	0.0939156	ABCC2
188.503	9.30349	1.05441	8.82343	1.11008e-18	3.75937e-17	ABCC3
2181.93	0.0489233	0.312811	0.156399	0.875718	0.938231	ABCC4
3934.77	0.365056	0.150258	2.42952	0.0151188	0.0590922	ABCC5
122.691	0.310179	0.672113	0.461498	0.644441	0.813091	ABCC6
586.26	-1.1264	0.447184	-2.51888	0.011773	0.048256	ABCC8
23.0634	4.46237	0.791862	5.63529	1.74762e-08	2.44285e-07	ABCC9
3154.6	-0.217514	0.159757	-1.36153	0.173346	0.370341	ABCD1
1.38182	-1.01378	2.22093	-0.456466	0.648055	0.815295	ABCD2
6835.11	-1.00998	0.209544	-4.81992	1.43616e-06	1.50689e-05	ABCD3
1677.21	0.28969	0.196434	1.47474	0.140283	0.320982	ABCD4
8110.32	-0.0423204	0.393503	-0.107548	0.914354	0.958852	ABCE1
11709.4	-0.241716	0.261261	-0.925191	0.354867	0.579004	ABCF1
10542.8	0.0792223	0.131258	0.603562	0.546135	0.748876	ABCF2
7615.49	-0.372122	0.211931	-1.75586	0.0791115	0.212606	ABCF3
300.813	0.414015	0.222751	1.85865	0.0630774	0.179811	ABCG1
161.12	0.406351	0.658106	0.617455	0.536934	0.74121	ABCG2
75.5867	-0.0859785	0.464081	-0.185266	0.85302	0.926407	ABCG4
2.24329	-0.588908	1.71418	-0.343551	0.731184	0.860806	ABCG5
0.313526	-0.0533571	4.08047	-0.0130762	0.989567	NA	ABCG8
5.49131	-0.34384	0.997801	-0.344597	0.730397	0.860366	ABHD1
1610.08	-0.121877	0.227009	-0.536882	0.591349	0.780781	ABHD10
2301.54	0.229569	0.319802	0.717848	0.472851	0.687994	ABHD11
3907.93	-0.444338	0.204496	-2.17284	0.0297923	0.101805	ABHD12
18.6619	0.972432	0.551554	1.76308	0.0778875	0.210096	ABHD12B
906.079	-0.123613	0.271726	-0.454917	0.649169	0.81576	ABHD13
940.903	-0.706717	0.300216	-2.35403	0.0185711	0.0694538	ABHD14A
81.9968	-0.504955	0.703149	-0.718133	0.472675	0.687956	ABHD14A-ACY1
4184.43	-0.418019	0.216985	-1.92648	0.0540441	0.159917	ABHD14B
2354.7	-0.700458	0.156367	-4.47957	7.47935e-06	6.99332e-05	ABHD15
2050.15	0.000848172	0.191855	0.00442089	0.996473	0.998329	ABHD16A
18.5779	-1.47093	3.72599	-0.394776	0.693008	0.840386	ABHD16B
6036.34	-0.448433	0.221882	-2.02105	0.0432747	0.135331	ABHD17A
883.959	-0.128521	0.242857	-0.529202	0.596665	0.784093	ABHD17B
1442.44	0.333321	0.180819	1.84339	0.0652718	0.184376	ABHD17C
402.063	-0.289718	0.46257	-0.626323	0.531103	0.736026	ABHD18
4182.32	0.867981	0.464058	1.87042	0.0614261	0.176068	ABHD2
539.523	-0.297895	0.220073	-1.35362	0.175859	0.373889	ABHD3
364.243	4.10277	0.368815	11.1242	9.56716e-29	5.86059e-27	ABHD4
930.48	1.13504	0.23567	4.81622	1.46301e-06	1.53312e-05	ABHD5
851.549	0.627092	0.21094	2.97284	0.00295056	0.0149384	ABHD6
2828.51	-0.620344	0.200606	-3.09235	0.00198576	0.0106559	ABHD8
3539.07	0.135577	0.246969	0.548963	0.583031	0.774554	ABI1
9968.45	-0.646816	0.395271	-1.63639	0.101759	0.254825	ABI2
3.26495	0.52616	1.28462	0.409583	0.682112	0.834431	ABI3
184.329	0.380941	0.577425	0.659723	0.509432	0.718422	ABI3BP
19463.9	-0.0847787	0.209218	-0.405216	0.685318	0.836302	ABL1
2148.03	0.745896	0.300104	2.48546	0.0129386	0.0522118	ABL2
47.3538	2.36115	0.794127	2.97326	0.00294651	0.0149224	ABLIM1
213.024	2.60721	0.364729	7.14833	8.7841e-13	1.93088e-11	ABLIM2
1205.84	5.8008	0.3316	17.4934	1.60911e-68	5.47163e-66	ABLIM3
0	NA	NA	NA	NA	NA	ABO
8723.9	0.71883	0.240378	2.99041	0.00278599	0.0142306	ABR
0	NA	NA	NA	NA	NA	ABRA
3083.69	-0.494855	0.265381	-1.8647	0.0622234	0.177925	ABRACL
3386.2	-0.956788	0.244214	-3.91783	8.93485e-05	0.000678543	ABT1
1106.29	-0.145941	0.208158	-0.701108	0.483236	0.697054	ABTB1
963.801	1.83212	0.263461	6.95404	3.54963e-12	7.54387e-11	ABTB2
2.06806	-4.52231	3.78579	-1.19455	0.232263	0.44462	AC002310.11
0	NA	NA	NA	NA	NA	AC002310.13
235.732	-0.0637945	0.507906	-0.125603	0.900046	0.95168	AC002398.9
4.02089	-0.974569	1.26697	-0.769211	0.441768	0.660689	AC002985.3
2.27152	0.498862	1.92782	0.258771	0.795812	0.897557	AC003002.4
15.7932	-0.311139	0.666491	-0.466832	0.64062	0.810507	AC003002.6
0	NA	NA	NA	NA	NA	AC003005.4
3.92301	0.494075	1.49571	0.330327	0.741153	0.866846	AC003006.7
0	NA	NA	NA	NA	NA	AC004076.7
1.00483	0.570603	2.33933	0.243917	0.807295	NA	AC004076.9
0.519518	-2.52223	3.99335	-0.631608	0.527643	NA	AC004158.1
22.924	5.96357	1.772	3.36545	0.000764178	0.0046419	AC004231.7
165.776	-0.569031	0.322742	-1.76312	0.077881	0.210096	AC004381.6
2076.29	-0.76243	0.31692	-2.40575	0.0161392	0.062112	AC004556.1
100.157	-0.0799639	0.275596	-0.290149	0.771702	0.884813	AC004754.3
0	NA	NA	NA	NA	NA	AC004813.1
0	NA	NA	NA	NA	NA	AC004824.2
0	NA	NA	NA	NA	NA	AC004824.3
0	NA	NA	NA	NA	NA	AC004853.1
0	NA	NA	NA	NA	NA	AC004953.1
0	NA	NA	NA	NA	NA	AC005042.1
0	NA	NA	NA	NA	NA	AC005477.1
0.674333	0.211489	3.95382	0.0534899	0.957342	NA	AC005480.1
1.22834	3.71764	3.18049	1.16889	0.242448	0.456968	AC005779.2
702.812	0.248626	0.798181	0.311491	0.755427	0.875558	AC005943.2
0.661665	-0.0825943	3.13471	-0.0263483	0.97898	NA	AC006026.2
0	NA	NA	NA	NA	NA	AC006328.4
12.4603	-0.379589	0.658561	-0.576392	0.56435	0.762502	AC006386.1
0	NA	NA	NA	NA	NA	AC006445.1
60.0437	0.758437	0.407854	1.85958	0.0629449	0.179495	AC006449.1
60.0437	0.758437	0.407854	1.85958	0.0629449	0.179495	AC006449.2
5.68423	-0.228576	1.79963	-0.127013	0.89893	0.951043	AC006486.9
0	NA	NA	NA	NA	NA	AC006538.4
0	NA	NA	NA	NA	NA	AC006994.3
12.5276	0.577924	0.700167	0.825409	0.409139	0.631445	AC007040.11
0.888001	-2.00768	2.38704	-0.841074	0.400306	NA	AC007163.2
143.093	0.367759	0.805563	0.456524	0.648013	0.815295	AC007192.4
0.280661	1.61474	4.05669	0.398045	0.690597	NA	AC007325.1
88.5809	0.276105	0.520536	0.530425	0.595817	0.783764	AC007325.2
716.412	-0.194714	0.387155	-0.502937	0.615009	0.795102	AC007325.4
0.14033	0.909069	4.08047	0.222785	0.823703	NA	AC007326.1
0	NA	NA	NA	NA	NA	AC007557.5
0	NA	NA	NA	NA	NA	AC007906.1
26.7652	0.238781	0.828572	0.288184	0.773206	0.885745	AC008074.1
1028.16	-0.918668	1.13288	-0.81091	0.417417	0.638953	AC008522.1
0	NA	NA	NA	NA	NA	AC008622.1
0	NA	NA	NA	NA	NA	AC008641.1
0	NA	NA	NA	NA	NA	AC008686.1
0	NA	NA	NA	NA	NA	AC008759.1
0	NA	NA	NA	NA	NA	AC008810.1
0	NA	NA	NA	NA	NA	AC008914.1
0.539934	-2.57275	3.99038	-0.644737	0.519097	NA	AC009022.1
1.95499	-1.75408	2.0377	-0.860815	0.38934	0.612757	AC009060.2
0.856004	-1.95453	2.39279	-0.816841	0.414019	NA	AC009060.3
9.39011	0.424973	1.65082	0.257431	0.796846	0.89819	AC009065.4
0	NA	NA	NA	NA	NA	AC009121.2
84.8463	-0.507951	1.95321	-0.260059	0.794818	0.897048	AC009133.22
11.2951	-6.96761	3.91079	-1.78164	0.0748085	0.20426	AC009133.23
0	NA	NA	NA	NA	NA	AC009336.19
0	NA	NA	NA	NA	NA	AC009491.1
0	NA	NA	NA	NA	NA	AC009491.2
0	NA	NA	NA	NA	NA	AC009758.1
50.0861	0.949745	1.06523	0.891587	0.372614	0.596856	AC009950.1
0	NA	NA	NA	NA	NA	AC009977.1
0	NA	NA	NA	NA	NA	AC010184.1
0	NA	NA	NA	NA	NA	AC010287.1
0.176826	-1.03456	4.08047	-0.25354	0.799851	NA	AC010412.1
80.6388	0.321004	1.64344	0.195324	0.845139	0.922665	AC010547.9
158.952	-0.861513	0.458632	-1.87844	0.0603209	0.173707	AC010642.1
0	NA	NA	NA	NA	NA	AC010646.3
0	NA	NA	NA	NA	NA	AC010655.1
11.0484	-2.20077	0.733091	-3.00204	0.00268178	0.013738	AC011043.1
0	NA	NA	NA	NA	NA	AC011043.2
0	NA	NA	NA	NA	NA	AC011155.1
0	NA	NA	NA	NA	NA	AC011295.1
0	NA	NA	NA	NA	NA	AC011380.1
0	NA	NA	NA	NA	NA	AC011513.3
7.44422	-0.275872	1.11816	-0.246721	0.805124	0.902515	AC011530.4
0	NA	NA	NA	NA	NA	AC011841.1
18.8242	0.553254	0.732374	0.755425	0.449994	0.668432	AC012005.3
0.190872	0.909069	4.08047	0.222785	0.823703	NA	AC012005.4
5058.65	-0.213609	0.312793	-0.682909	0.494664	0.706538	AC012314.2
4971.7	-0.166453	0.320035	-0.520109	0.602988	0.788173	AC012314.3
4971.85	-0.166539	0.320017	-0.520406	0.60278	0.788173	AC012314.5
5245.15	-0.101013	0.304387	-0.331857	0.739997	0.865998	AC012314.6
4971.7	-0.166453	0.320035	-0.520109	0.602988	0.788173	AC012314.7
4971.85	-0.166539	0.320017	-0.520407	0.60278	0.788173	AC012314.9
0	NA	NA	NA	NA	NA	AC012363.2
0	NA	NA	NA	NA	NA	AC013269.5
0	NA	NA	NA	NA	NA	AC013286.1
3119.6	1.63315	0.42999	3.79811	0.000145805	0.00105351	AC013461.1
6.36008	4.16993	1.43268	2.91057	0.0036077	0.017685	AC015688.3
0.280661	1.61474	4.05669	0.398045	0.690597	NA	AC016142.1
0.444431	2.26014	4.00332	0.564565	0.57237	NA	AC016549.1
0	NA	NA	NA	NA	NA	AC016577.1
0	NA	NA	NA	NA	NA	AC016734.1
0	NA	NA	NA	NA	NA	AC016753.2
0.173173	-1.01448	4.08047	-0.248619	0.803655	NA	AC017028.10
2.79048	-0.420801	1.30024	-0.323634	0.746215	0.870141	AC017081.1
0	NA	NA	NA	NA	NA	AC018512.1
0	NA	NA	NA	NA	NA	AC018755.18
0	NA	NA	NA	NA	NA	AC018867.1
0	NA	NA	NA	NA	NA	AC018902.1
0	NA	NA	NA	NA	NA	AC019206.1
2.21107	1.07047	1.59169	0.672534	0.501244	0.711876	AC021106.1
0	NA	NA	NA	NA	NA	AC022016.1
0	NA	NA	NA	NA	NA	AC022210.1
0.340203	-0.0744004	4.08047	-0.0182333	0.985453	NA	AC022405.1
0	NA	NA	NA	NA	NA	AC022819.2
0.381199	-2.05865	4.0258	-0.511365	0.609096	NA	AC023491.2
0	NA	NA	NA	NA	NA	AC024060.1
0	NA	NA	NA	NA	NA	AC024361.1
129.181	-0.279186	0.383162	-0.728635	0.466225	0.682562	AC024592.12
0	NA	NA	NA	NA	NA	AC025263.3
0.295437	-1.7381	4.05464	-0.428668	0.668165	NA	AC026248.1
3.27507	3.13804	1.59526	1.9671	0.0491714	0.149044	AC026369.1
0	NA	NA	NA	NA	NA	AC026449.1
10.7739	-1.7198	1.27302	-1.35097	0.176707	0.375212	AC037459.4
0.780523	1.74741	2.89941	0.602675	0.546725	NA	AC037482.2
0	NA	NA	NA	NA	NA	AC044810.2
0.445247	2.2626	4.00314	0.565206	0.571934	NA	AC055733.1
0	NA	NA	NA	NA	NA	AC055866.1
0	NA	NA	NA	NA	NA	AC063956.1
0	NA	NA	NA	NA	NA	AC063956.2
0	NA	NA	NA	NA	NA	AC064829.1
0.327256	1.80591	4.03841	0.447184	0.654742	NA	AC066615.1
22.2257	0.771795	0.766122	1.00741	0.31374	0.536762	AC068533.7
0	NA	NA	NA	NA	NA	AC069063.1
0	NA	NA	NA	NA	NA	AC069063.2
1.98932	2.74928	2.36183	1.16405	0.244405	0.458693	AC069368.3
0	NA	NA	NA	NA	NA	AC069499.1
0	NA	NA	NA	NA	NA	AC073072.1
0	NA	NA	NA	NA	NA	AC073130.2
1.37888	-0.272923	2.69413	-0.101303	0.91931	0.96095	AC073333.1
0	NA	NA	NA	NA	NA	AC073610.5
0	NA	NA	NA	NA	NA	AC073657.1
0	NA	NA	NA	NA	NA	AC074033.1
0	NA	NA	NA	NA	NA	AC079355.1
0	NA	NA	NA	NA	NA	AC079907.1
121.695	0.290775	1.76957	0.164319	0.86948	0.934663	AC084219.2
0	NA	NA	NA	NA	NA	AC087350.1
0	NA	NA	NA	NA	NA	AC087392.1
0	NA	NA	NA	NA	NA	AC087651.1
0	NA	NA	NA	NA	NA	AC087651.2
0	NA	NA	NA	NA	NA	AC087762.1
0	NA	NA	NA	NA	NA	AC090154.1
41106	0.0908592	0.270568	0.335809	0.737015	0.864015	AC090498.1
0	NA	NA	NA	NA	NA	AC090958.1
0	NA	NA	NA	NA	NA	AC091180.1
0	NA	NA	NA	NA	NA	AC091304.2
0.593088	1.2207	4.00832	0.304542	0.760715	NA	AC092159.1
0	NA	NA	NA	NA	NA	AC092384.1
0.96282	3.36442	2.61872	1.28476	0.198877	NA	AC092718.1
83.5669	-0.178727	0.771961	-0.231523	0.816909	0.909141	AC092835.2
5.8991	-1.076	1.49058	-0.721866	0.470377	0.68583	AC092881.1
0	NA	NA	NA	NA	NA	AC100821.2
0.444609	2.26067	4.00328	0.564705	0.572274	NA	AC104057.1
0.188685	-1.01448	4.08047	-0.248619	0.803655	NA	AC104073.2
0	NA	NA	NA	NA	NA	AC104389.1
0	NA	NA	NA	NA	NA	AC104389.2
7.39054	0.672697	0.945246	0.711664	0.476673	0.690938	AC104532.2
49.4486	-4.01972	2.76966	-1.45134	NA	NA	AC104534.3
0	NA	NA	NA	NA	NA	AC104581.1
0	NA	NA	NA	NA	NA	AC104650.2
0.80136	-0.86419	3.77181	-0.229118	0.818777	NA	AC104981.1
0	NA	NA	NA	NA	NA	AC105009.1
1.30214	-0.0328618	2.10462	-0.0156141	0.987542	0.994646	AC105052.2
0	NA	NA	NA	NA	NA	AC107081.1
1.36279	0.515798	2.69227	0.191585	0.848067	0.924474	AC108925.1
0	NA	NA	NA	NA	NA	AC108938.5
0	NA	NA	NA	NA	NA	AC109344.1
3.83287	0.830808	1.14439	0.725986	0.467847	0.683496	AC109486.1
2.37924	-0.879736	1.62889	-0.540082	0.589141	0.779254	AC109829.1
0.97553	-2.26529	2.83765	-0.798298	0.424698	NA	AC109829.2
0	NA	NA	NA	NA	NA	AC110602.1
15.0508	-1.59587	1.43818	-1.10964	0.267153	0.485153	AC110615.1
0	NA	NA	NA	NA	NA	AC112719.2
630.573	0.297716	0.290665	1.02426	0.305713	0.528598	AC113404.1
0	NA	NA	NA	NA	NA	AC118758.1
0	NA	NA	NA	NA	NA	AC123512.1
0	NA	NA	NA	NA	NA	AC123512.2
0	NA	NA	NA	NA	NA	AC123512.3
1.10386	0.292611	2.27006	0.128901	0.897436	0.950126	AC124312.1
0	NA	NA	NA	NA	NA	AC126407.1
116.18	-1.62202	0.601553	-2.69639	0.0070096	0.0312618	AC129492.1
4.56695	-1.60149	1.11068	-1.4419	0.149332	0.334468	AC130310.1
0	NA	NA	NA	NA	NA	AC131263.1
0	NA	NA	NA	NA	NA	AC133551.1
0	NA	NA	NA	NA	NA	AC136352.4
6.37327	1.14312	1.7801	0.642166	0.520766	0.727077	AC136352.5
52.3877	-0.281375	0.504067	-0.558209	0.576701	0.770737	AC136612.1
744.321	-0.406531	0.330813	-1.22889	0.219114	0.429366	AC136616.1
0	NA	NA	NA	NA	NA	AC136616.2
0	NA	NA	NA	NA	NA	AC136616.3
0	NA	NA	NA	NA	NA	AC138028.1
1575.73	0.241913	0.300715	0.804457	0.421133	0.641858	AC138969.4
0	NA	NA	NA	NA	NA	AC141272.1
0	NA	NA	NA	NA	NA	AC142525.1
1853.47	-0.240145	0.344481	-0.697121	0.485727	0.698592	AC145212.2
1377.39	-0.245985	0.172058	-1.42967	0.152813	0.340033	AC145212.4
0.68195	2.85988	3.829	0.7469	0.455124	NA	AC156455.2
0	NA	NA	NA	NA	NA	AC171558.1
0	NA	NA	NA	NA	NA	AC171558.2
2.61705	-1.34058	2.34608	-0.57141	0.567722	0.764085	AC208162.1
0.14033	0.909069	4.08047	0.222785	0.823703	NA	AC213203.1
0	NA	NA	NA	NA	NA	AC231657.1
13.9412	-1.08049	1.04233	-1.03661	0.299919	0.521832	AC233755.1
2.03181	-0.156311	1.49798	-0.104348	0.916894	0.960161	AC233755.2
2.53066	-0.957875	1.93651	-0.49464	0.620854	0.798506	AC234582.1
0.163628	0.909069	4.08047	0.222785	0.823703	NA	AC234582.2
0	NA	NA	NA	NA	NA	AC236040.1
1073.41	0.126817	0.189062	0.670768	0.502368	0.712784	AC240274.1
6.98964	0.517099	0.827151	0.625157	0.531868	0.736596	AC241377.2
34.9623	0.562366	0.791602	0.710415	0.477447	0.691316	AC241585.2
0	NA	NA	NA	NA	NA	AC242988.1
23.0359	-1.38608	0.59091	-2.34567	0.0189929	0.0707013	AC243687.1
0	NA	NA	NA	NA	NA	AC243756.1
0	NA	NA	NA	NA	NA	AC243790.2
0.280661	1.61474	4.05669	0.398045	0.690597	NA	AC243945.1
0	NA	NA	NA	NA	NA	AC245015.1
2.99234	1.24619	1.65435	0.753284	0.451279	0.669445	AC245100.1
69.7863	1.73952	0.348556	4.99065	6.01759e-07	6.71568e-06	AC253572.1
0	NA	NA	NA	NA	NA	AC254560.1
0	NA	NA	NA	NA	NA	AC254788.1
2.61705	-1.34058	2.34608	-0.57141	0.567722	0.764085	AC254847.1
19.5767	-1.60979	1.09619	-1.46853	0.141959	0.323505	AC254944.3
32.1929	-1.00063	0.63671	-1.57157	0.11605	0.279871	AC254995.1
7248.42	-0.149355	0.271096	-0.550931	0.581681	0.773687	ACAA1
5901.25	-0.129363	0.166799	-0.775559	0.438009	0.657375	ACAA2
6533.31	-0.256494	0.178137	-1.43987	0.149905	0.335265	ACACA
2027.74	-1.02829	0.477686	-2.15266	0.0313458	0.105825	ACACB
3352.98	-0.135336	0.208253	-0.649863	0.51578	0.722579	ACAD10
2517.79	-0.441624	0.236345	-1.86856	0.0616846	0.176657	ACAD11
2144.65	0.0888253	0.160127	0.554717	0.579088	0.771891	ACAD8
3465.75	0.039942	0.168866	0.23653	0.813021	0.906472	ACAD9
0	NA	NA	NA	NA	NA	ACADL
4144.39	-0.351157	0.367965	-0.954324	0.33992	0.564174	ACADM
457.411	1.07657	0.313678	3.43209	0.000598952	0.00373913	ACADS
1603.81	0.20608	0.414644	0.497004	0.619186	0.797594	ACADSB
25561.3	-0.428548	0.300632	-1.42549	0.154015	0.341887	ACADVL
129.164	6.25822	0.62138	10.0715	7.38533e-24	3.39929e-22	ACAN
76.8306	-0.769347	0.831218	-0.925566	0.354672	0.578742	ACAP1
3282.35	-0.133676	0.583327	-0.229162	0.818743	0.909666	ACAP2
3378.14	-0.56638	0.161463	-3.50781	0.000451814	0.00292127	ACAP3
8507.12	-0.0517467	0.220584	-0.234589	0.814528	0.907318	ACAT1
1795.56	-0.617658	0.189837	-3.25362	0.00113946	0.00658995	ACAT2
4264.56	0.13126	0.30932	0.42435	0.671311	0.828424	ACBD3
414.9	-0.243487	0.181058	-1.3448	0.178691	0.378316	ACBD4
2164.8	-0.337408	0.385397	-0.87548	0.381313	0.605955	ACBD5
2399.58	-0.201148	0.397447	-0.5061	0.612786	0.793998	ACBD6
9.40241	-0.387176	0.793068	-0.4882	0.625409	0.801633	ACBD7
576.217	-0.476752	0.210618	-2.26359	0.0235995	0.0843628	ACCS
0	NA	NA	NA	NA	NA	ACCSL
1810.4	-0.604272	0.228773	-2.64137	0.00825727	0.035963	ACD
127.212	1.61989	0.464545	3.48704	0.000488389	0.00312502	ACE
1.21786	0.749705	2.65818	0.282037	0.777915	0.888391	ACE2
1.63562	2.97116	2.50128	1.18786	0.234889	0.448152	ACER1
372.79	0.472875	0.581846	0.812716	0.416381	0.63807	ACER2
1089.98	0.00986441	0.41614	0.0237045	0.981088	0.991145	ACER3
147.531	2.62245	0.385191	6.80817	9.88476e-12	2.02086e-10	ACHE
13161.3	-0.224879	0.188919	-1.19035	0.23391	0.446797	ACIN1
14.5732	0.589391	0.599896	0.98249	0.325859	0.549707	ACKR1
45.7101	0.128404	0.455712	0.281767	0.778123	0.888406	ACKR2
595.358	0.379908	0.435702	0.871944	0.383239	0.607454	ACKR3
2.30878	-0.483311	1.31311	-0.368067	0.712824	0.852735	ACKR4
23452.9	0.41103	0.251785	1.63246	0.102582	0.256216	ACLY
2.02555	3.59652	1.97821	1.81807	0.0690535	0.192453	ACMSD
4498.77	0.5417	0.205519	2.63577	0.00839458	0.0364816	ACO1
27707.6	-0.70616	0.206553	-3.41878	0.000629028	0.00390494	ACO2
500.479	-0.88331	0.335417	-2.63346	0.00845186	0.0367114	ACOT1
732.629	-0.588375	0.16768	-3.50892	0.000449931	0.00291023	ACOT11
0.519518	-2.52223	3.99335	-0.631608	0.527643	NA	ACOT12
3728.17	-0.963078	0.407	-2.36629	0.0179676	0.0678395	ACOT13
2436.04	-0.968613	0.212427	-4.55973	5.12183e-06	4.9301e-05	ACOT2
3.09782	-0.807268	1.38387	-0.583343	0.559663	0.759246	ACOT4
0	NA	NA	NA	NA	NA	ACOT6
10058.9	-0.513216	0.273297	-1.87787	0.060399	0.173901	ACOT7
1494.87	-0.12811	0.287457	-0.445665	0.65584	0.820021	ACOT8
2193.13	0.290058	0.315883	0.918245	0.358491	0.582464	ACOT9
4615.5	-0.196262	0.327628	-0.599039	0.549147	0.751129	ACOX1
91.0096	3.18188	0.510472	6.2332	4.56998e-10	7.7148e-09	ACOX2
1359.6	0.0746916	0.349761	0.21355	0.830898	0.916066	ACOX3
6.75108	-0.712217	0.911219	-0.78161	0.434444	0.654139	ACOXL
5280.54	-0.204936	0.217542	-0.942052	0.346166	0.569886	ACP1
2665.6	0.220943	0.209456	1.05485	0.291496	0.513048	ACP2
68.1308	6.02052	0.726237	8.29002	1.13229e-16	3.44275e-15	ACP5
426.591	1.19569	0.309759	3.86007	0.000113354	0.000840919	ACP6
1.12609	1.86693	2.24551	0.831404	0.405745	0.628889	ACP7
5.44877	5.8454	1.56944	3.72453	0.000195682	0.00137863	ACPP
0.487283	-0.79254	4.05385	-0.195503	0.844999	NA	ACPT
9.59804	-0.488106	0.759171	-0.642946	0.520259	0.726497	ACR
21.6248	-0.684676	0.49612	-1.38006	0.167568	0.362695	ACRBP
160.779	-0.430628	0.377629	-1.14034	0.254143	0.470607	ACRC
14.7336	-1.20715	0.659367	-1.83078	0.0671339	0.188219	ACRV1
48.2477	-0.412663	0.636874	-0.647951	0.517016	0.723788	ACSBG1
0.506264	-2.48695	3.99576	-0.622398	0.53368	NA	ACSBG2
1035.33	-0.234841	0.374139	-0.627683	0.530212	0.735157	ACSF2
1985.51	0.0749228	0.356519	0.210151	0.83355	0.917461	ACSF3
1203.31	0.453088	0.261065	1.73554	0.0826457	0.219248	ACSL1
8520.32	-0.697158	0.199171	-3.50031	0.000464722	0.00299196	ACSL3
1696.53	1.82311	0.32368	5.63244	1.77673e-08	2.47952e-07	ACSL4
78.098	6.13364	0.711858	8.61639	6.90997e-18	2.25753e-16	ACSL5
75.0366	1.27768	0.42813	2.98433	0.00284198	0.0144722	ACSL6
0.719591	2.91943	2.93073	0.996147	0.319179	NA	ACSM1
0	NA	NA	NA	NA	NA	ACSM2A
0.280661	1.61474	4.05669	0.398045	0.690597	NA	ACSM2B
8.12735	0.1214	1.0502	0.115598	0.907971	0.95553	ACSM3
0	NA	NA	NA	NA	NA	ACSM4
3.84824	5.36341	1.73324	3.09444	0.00197183	0.0105914	ACSM5
0.556501	-2.61247	3.98817	-0.655056	0.512432	NA	ACSM6
4.73214	3.46274	1.49164	2.32144	0.0202632	0.0744325	ACSS1
3183.55	1.40616	0.225235	6.2431	4.28984e-10	7.27134e-09	ACSS2
15.6136	2.28023	0.887763	2.56851	0.0102137	0.0428991	ACSS3
53.363	0.227513	0.629146	0.361621	0.717635	0.854454	ACTA1
1852.94	5.33748	0.324557	16.4454	9.04656e-61	2.21667e-58	ACTA2
170818	0.314675	0.338436	0.929793	0.352478	0.576858	ACTB
72.7228	6.08401	0.807933	7.53033	5.06117e-14	1.25304e-12	ACTBL2
75.95	6.5322	0.848958	7.69438	1.42185e-14	3.74264e-13	ACTC1
232441	0.10823	0.231544	0.467428	0.640194	0.810507	ACTG1
2.4061	2.50505	2.20453	1.13632	0.255823	0.472459	ACTG2
7.31615	-0.973476	0.866205	-1.12384	0.261081	0.477984	ACTL10
3279.02	-0.299778	0.243664	-1.23029	0.218587	0.428584	ACTL6A
8.22513	-1.12997	0.804468	-1.40461	0.160136	0.351865	ACTL6B
0.331405	-0.0508502	4.08047	-0.0124618	0.990057	NA	ACTL7A
0.901603	-0.478771	3.70118	-0.129356	0.897076	NA	ACTL7B
6.71198	3.62802	1.16543	3.11305	0.00185166	0.0100431	ACTL8
0	NA	NA	NA	NA	NA	ACTL9
22560.8	0.865682	0.210266	4.11708	3.83703e-05	0.000314165	ACTN1
69.7584	-0.689456	0.38518	-1.78996	0.0734607	0.201496	ACTN2
9.2427	-1.69066	0.816323	-2.07107	0.0383524	0.123163	ACTN3
25911.1	1.26412	0.222061	5.69264	1.25087e-08	1.77984e-07	ACTN4
3158.92	0.0585612	0.309998	0.188908	0.850165	0.925241	ACTR10
13411.2	0.0027481	0.235634	0.0116626	0.990695	0.995844	ACTR1A
3586.94	0.221418	0.185508	1.19357	0.232644	0.445114	ACTR1B
20477.4	-0.0442173	0.382725	-0.115533	0.908023	0.95553	ACTR2
9297.51	0.485309	0.38655	1.25549	0.209302	0.417851	ACTR3
616.23	-0.134542	0.183036	-0.735055	0.462306	0.678614	ACTR3B
12.0806	0.505243	1.20429	0.419537	0.674824	0.830545	ACTR3C
590.975	0.109047	0.185413	0.588127	0.556447	0.756858	ACTR5
1087.64	-0.115771	0.244948	-0.472634	0.636474	0.808549	ACTR6
1805.74	0.148094	0.206152	0.718372	0.472528	0.687869	ACTR8
0	NA	NA	NA	NA	NA	ACTRT1
0	NA	NA	NA	NA	NA	ACTRT2
247.602	-0.440609	0.304681	-1.44613	0.14814	0.332521	ACTRT3
3053.26	0.283689	0.229505	1.23609	0.216424	0.425996	ACVR1
2239.09	0.829842	0.161513	5.13794	2.77766e-07	3.24781e-06	ACVR1B
4.23835	2.21276	1.3765	1.60753	0.107939	0.26581	ACVR1C
502.401	-0.0155926	0.237241	-0.0657246	0.947597	0.975042	ACVR2A
470.844	-0.0853826	0.284785	-0.299814	0.764319	0.880473	ACVR2B
343.948	6.07114	0.553362	10.9714	5.24672e-28	3.04602e-26	ACVRL1
2586.11	-0.298857	0.276699	-1.08008	0.280106	0.500549	ACY1
0.303918	1.71255	4.04704	0.423161	0.672178	NA	ACY3
303.004	-0.442706	0.288789	-1.53298	0.125282	0.296218	ACYP1
577.992	-0.333425	0.294096	-1.13373	0.256908	0.473623	ACYP2
18.2404	-1.51188	0.955366	-1.58252	0.113531	0.275511	AD000671.6
2779.64	0.731383	0.418623	1.74712	0.0806174	0.215609	ADA
0	NA	NA	NA	NA	NA	ADAD1
0.61675	2.69264	3.92832	0.685444	0.493064	NA	ADAD2
536.731	-0.577397	0.269168	-2.14512	0.0319435	0.107181	ADAL
7260.85	0.84483	0.560598	1.50702	0.131807	0.306862	ADAM10
1209.07	-0.367	0.328244	-1.11807	0.263537	0.481046	ADAM11
59.8504	9.31557	1.23627	7.53524	4.87426e-14	1.21036e-12	ADAM12
4748.65	0.552135	0.324211	1.70301	0.088566	0.230576	ADAM15
6453.97	0.453792	0.281153	1.61404	0.106519	0.263443	ADAM17
0.147719	-1.01448	4.08047	-0.248619	0.803655	NA	ADAM18
1262.56	2.28782	0.448606	5.09985	3.39926e-07	3.93049e-06	ADAM19
0	NA	NA	NA	NA	NA	ADAM2
4.81331	0.0416693	1.1347	0.0367227	0.970706	0.984893	ADAM20
24.4226	1.93601	0.553291	3.49907	0.00046688	0.00300354	ADAM21
269.724	0.188244	0.580649	0.324196	0.74579	0.869827	ADAM22
832.894	-0.47845	0.247888	-1.93011	0.0535935	0.159005	ADAM23
4.0186	5.38274	1.83463	2.93397	0.0033466	0.0166352	ADAM28
0.998567	3.36165	3.52189	0.954503	0.339829	NA	ADAM29
0	NA	NA	NA	NA	NA	ADAM30
29.0634	-2.82185	1.09724	-2.57177	0.0101179	0.042561	ADAM32
9.65423	0.627418	0.926196	0.677413	0.498144	0.70962	ADAM33
0	NA	NA	NA	NA	NA	ADAM7
225.54	-1.22163	0.364406	-3.35239	0.000801176	0.00483491	ADAM8
14259.1	0.18414	0.419231	0.439232	0.660493	0.822937	ADAM9
0	NA	NA	NA	NA	NA	ADAMDEC1
6359.68	-1.39107	0.353374	-3.93653	8.26681e-05	0.000632713	ADAMTS1
448.005	0.734813	0.228171	3.22045	0.0012799	0.0073033	ADAMTS10
12.1168	3.87555	1.4171	2.73485	0.00624086	0.0282568	ADAMTS12
295.596	-0.705192	0.345874	-2.03887	0.041463	0.130745	ADAMTS13
155.29	3.25552	0.314289	10.3584	3.83497e-25	1.93046e-23	ADAMTS14
87.9859	5.3159	0.978335	5.43362	5.52235e-08	7.1439e-07	ADAMTS15
37.5695	4.806	0.78813	6.09798	1.07419e-09	1.73432e-08	ADAMTS16
4.65357	1.87143	1.25685	1.48899	0.13649	0.315169	ADAMTS17
140.544	0.348393	0.657154	0.530155	0.596005	0.783769	ADAMTS18
2.11092	0.852619	1.89327	0.450341	0.652464	0.817614	ADAMTS19
71.794	0.816808	0.635274	1.28576	0.198528	0.404174	ADAMTS2
0.387925	-2.04479	4.02808	-0.507633	0.611711	NA	ADAMTS20
77.5503	2.43807	0.360958	6.75443	1.43399e-11	2.89263e-10	ADAMTS3
15.9817	3.03689	0.794756	3.82116	0.000132827	0.000971537	ADAMTS4
32.1404	-0.642983	0.846985	-0.759143	0.447767	0.666133	ADAMTS5
105.208	3.97641	0.600202	6.62511	3.46984e-11	6.75403e-10	ADAMTS6
2738.62	0.579965	0.194911	2.97554	0.00292477	0.0148412	ADAMTS7
5.61621	0.182963	1.04846	0.174506	0.861468	0.93019	ADAMTS8
2.92833	0.784611	1.44454	0.543154	0.587023	0.77765	ADAMTS9
13761.4	2.63222	0.248814	10.5791	3.72651e-26	1.95715e-24	ADAMTSL1
2.09151	-1.05698	1.45293	-0.727483	0.46693	0.683235	ADAMTSL2
1023.91	1.2781	0.429414	2.97638	0.00291673	0.0148166	ADAMTSL3
914.456	1.12272	0.271728	4.13179	3.59955e-05	0.000296177	ADAMTSL4
768.651	0.0328781	0.293643	0.111966	0.91085	0.95697	ADAMTSL5
408.406	0.397636	0.339456	1.17139	0.241441	0.456162	ADAP1
290.289	-0.164464	0.235361	-0.698772	0.484694	0.697829	ADAP2
29426.7	-0.0196754	0.414022	-0.0475227	0.962097	0.981668	ADAR
1086.08	0.526599	0.192317	2.73819	0.0061778	0.0280302	ADARB1
0.163628	0.909069	4.08047	0.222785	0.823703	NA	ADARB2
1648.2	0.244981	0.221509	1.10597	0.268741	0.486926	ADAT1
426.259	-0.479715	0.225412	-2.12817	0.0333229	0.110669	ADAT2
524.858	-0.614292	0.269361	-2.28056	0.0225748	0.0814062	ADAT3
935.6	-0.616972	0.221246	-2.78863	0.00529323	0.0245124	ADCK1
1455.68	-0.223823	0.163274	-1.37085	0.170423	0.366398	ADCK2
3534.13	-0.169777	0.296353	-0.572886	0.566722	0.763519	ADCK3
2468.92	-0.800699	0.204901	-3.90774	9.31635e-05	0.000704626	ADCK4
426.2	-0.20571	0.316354	-0.650251	0.51553	0.722512	ADCK5
322.277	0.294897	0.30473	0.967731	0.333179	0.557596	ADCY1
6.92587	-3.16575	1.3186	-2.40085	0.0163571	0.0627978	ADCY10
9.61854	1.25608	1.10292	1.13887	0.254758	0.471276	ADCY2
3378.81	-0.0460785	0.14436	-0.319191	0.749582	0.872088	ADCY3
1.15892	1.08189	2.06451	0.524043	0.600248	0.786949	ADCY4
551.662	0.741183	0.290085	2.55505	0.0106172	0.0443033	ADCY5
3467.25	-0.119555	0.2564	-0.466283	0.641013	0.810507	ADCY6
794.468	0.459135	0.414051	1.10889	0.267479	0.485431	ADCY7
12.5719	2.9773	0.876302	3.39758	0.000679856	0.00417845	ADCY8
1299.88	0.413959	0.29627	1.39724	0.162343	0.354702	ADCY9
3.69683	-2.06885	1.28738	-1.60702	0.10805	0.265968	ADCYAP1
5.25497	3.18086	1.46521	2.17093	0.0299366	0.102193	ADCYAP1R1
14062.1	-0.103158	0.199543	-0.516972	0.605176	0.789645	ADD1
51.0249	2.1605	0.55995	3.85837	0.000114146	0.000846042	ADD2
2571.5	-0.420252	0.342352	-1.22755	0.219617	0.429743	ADD3
0	NA	NA	NA	NA	NA	ADGB
15.5128	0.355121	0.589021	0.602901	0.546575	0.749204	ADGRA1
716.319	0.254772	0.299826	0.849735	0.395473	0.619033	ADGRA2
6670.28	-0.236657	0.267303	-0.885349	0.375968	0.600317	ADGRA3
5113.89	-0.649657	0.245511	-2.64614	0.00814156	0.0355117	ADGRB1
8703.67	-0.259913	0.227248	-1.14374	0.252731	0.469244	ADGRB2
5.5857	-0.541486	0.928348	-0.583279	0.559706	0.759246	ADGRB3
8.90395	2.70071	0.914579	2.95295	0.00314752	0.0157916	ADGRD1
0.892361	-0.622345	2.44805	-0.254221	0.799325	NA	ADGRD2
41.3799	4.37502	0.651939	6.71078	1.93592e-11	3.85841e-10	ADGRE1
28.3279	5.7058	1.09676	5.2024	1.96728e-07	2.36159e-06	ADGRE2
0	NA	NA	NA	NA	NA	ADGRE3
137.007	2.23708	0.500249	4.47194	7.75149e-06	7.22749e-05	ADGRE5
0.190872	0.909069	4.08047	0.222785	0.823703	NA	ADGRF1
31.4515	7.48519	1.39368	5.37082	7.83773e-08	9.90836e-07	ADGRF2
13.0892	0.0829287	0.988689	0.0838774	0.933154	0.967619	ADGRF3
241.221	8.14127	0.722086	11.2747	1.75053e-29	1.12615e-27	ADGRF4
5.6245	3.48545	1.26953	2.74546	0.00604267	0.027479	ADGRF5
10832.2	4.84464	0.34449	14.0632	6.38988e-45	8.44478e-43	ADGRG1
11.2333	1.84225	0.970216	1.8988	0.0575908	0.167612	ADGRG2
6.10178	4.23247	1.42805	2.96382	0.00303851	0.0153139	ADGRG3
75.5118	9.65673	1.24486	7.75728	8.67715e-15	2.30221e-13	ADGRG4
44.0584	4.27565	0.555906	7.69132	1.45629e-14	3.80922e-13	ADGRG5
5758.3	-0.58224	0.464025	-1.25476	0.209566	0.418161	ADGRG6
1.39612	2.48568	2.03873	1.21923	0.222758	0.433497	ADGRG7
11609.7	-0.918003	0.256041	-3.58538	0.000336591	0.00225142	ADGRL1
490.423	-0.238152	0.246012	-0.968049	0.33302	0.557498	ADGRL2
33.973	-0.346056	0.825025	-0.419448	0.674888	0.830548	ADGRL3
4.76375	0.741611	1.38882	0.533987	0.59335	0.78209	ADGRL4
21.3684	4.57465	0.843148	5.42568	5.7735e-08	7.45144e-07	ADGRV1
0	NA	NA	NA	NA	NA	ADH1A
0	NA	NA	NA	NA	NA	ADH1B
0.191172	-1.01448	4.08047	-0.248619	0.803655	NA	ADH1C
0.443156	-2.31473	4.00657	-0.577733	0.563444	NA	ADH4
10846.1	0.0107487	0.197921	0.054308	0.95669	0.979318	ADH5
1.69725	-1.21044	1.80813	-0.669439	0.503215	0.713702	ADH6
0	NA	NA	NA	NA	NA	ADH7
37.0297	0.874003	0.590825	1.47929	0.139062	0.319241	ADHFE1
4478.78	-0.248958	0.254597	-0.977852	0.328147	0.552226	ADI1
0	NA	NA	NA	NA	NA	ADIG
0	NA	NA	NA	NA	NA	ADIPOQ
6965.7	-0.285257	0.12817	-2.22562	0.02604	0.0915778	ADIPOR1
6115.57	-0.319951	0.151775	-2.10806	0.0350259	0.115041	ADIPOR2
1.18398	2.65677	2.84337	0.934374	0.350111	0.574112	ADIRF
2092.24	0.461036	0.240614	1.91608	0.0553546	0.162839	ADK
418.855	1.2919	0.234884	5.50015	3.7947e-08	5.03001e-07	ADM
636.29	-0.506009	0.236198	-2.14231	0.0321682	0.107693	ADM2
115.636	-2.51592	0.488909	-5.14599	2.66113e-07	3.11951e-06	ADM5
6712.26	-0.0878589	0.300972	-0.291917	0.77035	0.884419	ADNP
2339.72	-0.0576294	0.192581	-0.299247	0.764751	0.880722	ADNP2
2723.75	-0.0493541	0.219414	-0.224936	0.822029	0.911162	ADO
483.741	4.33433	0.234143	18.5114	1.66976e-76	8.69423e-74	ADORA1
32.4213	2.52642	0.668021	3.78195	0.000155607	0.00112045	ADORA2A
885.803	1.07219	0.238272	4.49985	6.80025e-06	6.43052e-05	ADORA2B
0	NA	NA	NA	NA	NA	ADORA3
3314.38	0.236958	0.145116	1.63289	0.102493	0.256183	ADPGK
3.63124	5.27401	1.72113	3.06427	0.00218201	0.0115602	ADPRH
1082.74	-0.695552	0.210564	-3.30329	0.000955581	0.00563142	ADPRHL1
2929.83	0.175645	0.315676	0.556409	0.577931	0.771422	ADPRHL2
530.927	0.0479505	0.362116	0.132418	0.894654	0.948775	ADPRM
2.73424	1.7349	1.43633	1.20787	0.227098	0.438358	ADRA1A
103.891	10.1139	1.24244	8.14034	3.94168e-16	1.15831e-14	ADRA1B
97.3674	1.73462	0.435905	3.97935	6.91036e-05	0.000539552	ADRA1D
58.6676	2.79594	0.643003	4.34826	1.37222e-05	0.000122726	ADRA2A
53.2805	5.45698	0.771981	7.0688	1.56276e-12	3.4082e-11	ADRA2B
720.048	-0.78178	0.454348	-1.72066	0.085312	0.224171	ADRA2C
0	NA	NA	NA	NA	NA	ADRB1
115.468	3.98816	0.494636	8.06281	7.45577e-16	2.14556e-14	ADRB2
0.684142	0.235866	3.09049	0.0763198	0.939165	NA	ADRB3
3733.43	-0.28655	0.15439	-1.85602	0.0634508	0.180546	ADRBK1
1363.04	0.0774657	0.3159	0.245222	0.806284	0.902703	ADRBK2
18051	-0.784104	0.315932	-2.48187	0.0130694	0.0525487	ADRM1
6405.87	-0.126102	0.203745	-0.61892	0.535969	0.740638	ADSL
2735.33	0.296949	0.152565	1.94637	0.0516097	0.154551	ADSS
3310.6	-0.909827	0.223735	-4.06654	4.77161e-05	0.000383901	ADSSL1
51.7169	9.10563	1.40123	6.4983	8.12336e-11	1.514e-09	ADTRP
2.53134	1.20882	1.52001	0.795269	0.426457	0.646556	AEBP1
1928.64	0.27608	0.414254	0.66645	0.505124	0.715371	AEBP2
9107.79	-0.298884	0.142782	-2.09328	0.0363239	0.118162	AEN
22625	-0.38277	0.230877	-1.6579	0.0973381	0.247177	AES
587.437	0.73561	0.582134	1.26364	0.206358	0.414057	AF011889.5
3.19619	-2.56905	1.42613	-1.80142	0.0716373	0.197816	AF111168.2
36.682	-0.320063	0.401324	-0.797517	0.425151	0.645248	AF131216.1
0	NA	NA	NA	NA	NA	AF165138.7
3012.23	1.08596	0.322883	3.36331	0.000770138	0.00467129	AFAP1
393.783	0.348391	0.298272	1.16803	0.242795	0.457319	AFAP1L1
4.98389	1.26665	1.85709	0.682062	0.4952	0.707028	AFAP1L2
862.042	0.475693	0.495568	0.959895	0.337108	0.561745	AFF1
20.9151	1.84076	0.598191	3.07721	0.00208947	0.0111377	AFF2
4.85964	4.02324	1.70183	2.36407	0.0180753	0.0681534	AFF3
11421.7	-0.0760424	0.569063	-0.133627	0.893697	0.948326	AFF4
9551.54	-0.441002	0.171885	-2.56568	0.0102975	0.0432184	AFG3L2
0	NA	NA	NA	NA	NA	AFM
1241.23	-0.28023	0.273465	-1.02474	0.305487	0.528452	AFMID
10.4224	2.94709	1.05861	2.78392	0.00537057	0.0247811	AFP
1315.86	0.0745252	0.192116	0.387918	0.698077	0.843708	AFTPH
746.324	0.905959	0.327889	2.76301	0.00572713	0.0262302	AGA
3753.78	-0.0224792	0.269216	-0.0834987	0.933455	0.967619	AGAP1
5.69146	0.790003	1.11454	0.708814	0.47844	0.692173	AGAP14P
2404.68	-1.19877	0.43391	-2.76273	0.00573207	0.0262456	AGAP2
8461.74	-0.202998	0.251042	-0.808625	0.418731	0.639844	AGAP3
270.564	-0.588792	0.304338	-1.93466	0.0530315	0.157663	AGAP4
175.213	-0.763452	0.344426	-2.21659	0.0266508	0.0930544	AGAP5
525.662	-0.845175	0.483994	-1.74625	0.0807674	0.215976	AGAP6
243.267	-0.356946	0.440635	-0.810072	0.417899	0.639221	AGAP9
0.163628	0.909069	4.08047	0.222785	0.823703	NA	AGBL1
61.3018	-0.589143	0.434565	-1.35571	0.175192	0.373185	AGBL2
33.0272	-0.281109	0.470574	-0.597374	0.550258	0.752053	AGBL3
0.94997	-0.813443	2.91676	-0.278886	0.780332	NA	AGBL4
3912.39	-0.0231722	0.147902	-0.156672	0.875503	0.938231	AGBL5
126.408	-0.673407	0.493349	-1.36497	0.172262	0.368877	AGER
4377.61	0.21395	0.170683	1.25349	0.210026	0.418695	AGFG1
702.14	0.474745	0.243983	1.94581	0.0516775	0.154698	AGFG2
3329.61	0.00511064	0.188417	0.0271241	0.978361	0.989295	AGGF1
2401.36	0.194924	0.198304	0.982956	0.325629	0.549375	AGK
1569.44	0.0140637	0.535409	0.0262673	0.979044	0.989676	AGL
8.84306	-0.191902	0.975557	-0.19671	0.844054	0.922205	AGMAT
1976.21	-1.01764	0.224671	-4.52947	5.91314e-06	5.63965e-05	AGMO
6166.3	-0.161506	0.441969	-0.365425	0.714794	0.85343	AGO1
3796.51	-0.578302	0.405129	-1.42745	0.153449	0.341085	AGO2
1840.77	-0.282763	0.334447	-0.845463	0.397852	0.621276	AGO3
755.189	0.102334	0.480294	0.213065	0.831276	0.916329	AGO4
9388.91	-0.289575	0.142238	-2.03585	0.0417657	0.131525	AGPAT1
4621.18	-0.171587	0.298166	-0.575473	0.564972	0.762598	AGPAT2
1490.57	0.903354	0.292143	3.09217	0.001987	0.0106587	AGPAT3
1427.69	-0.50083	0.195243	-2.56516	0.0103128	0.0432717	AGPAT4
2787.17	-0.116439	0.389702	-0.298791	0.765099	0.881008	AGPAT5
2056.1	0.252401	0.363405	0.694546	0.48734	0.700535	AGPS
1.26736	-0.942777	1.9894	-0.473899	0.635572	0.80808	AGR2
0	NA	NA	NA	NA	NA	AGR3
35336.2	0.625851	0.233451	2.68087	0.00734309	0.0324451	AGRN
1.36731	0.683398	2.68921	0.254126	0.799398	0.899025	AGRP
50.172	6.19617	0.857271	7.22778	4.9095e-13	1.11752e-11	AGT
681.583	0.260927	0.242154	1.07752	0.281246	0.502049	AGTPBP1
170.618	-1.45534	0.252419	-5.76557	8.13803e-09	1.18115e-07	AGTR1
0.382344	-2.06117	4.02544	-0.512035	0.608626	NA	AGTR2
4050.91	0.138866	0.248822	0.558093	0.576781	0.770737	AGTRAP
0.74451	0.0984139	3.04047	0.032368	0.974179	NA	AGXT
0	NA	NA	NA	NA	NA	AGXT2
6813.39	-0.41618	0.433774	-0.959441	0.337337	0.56179	AHCTF1
33839.2	-0.0839581	0.199376	-0.421104	0.673679	0.829884	AHCY
12198.7	1.26305	0.260494	4.84869	1.24279e-06	1.31894e-05	AHCYL1
2306.32	-0.0714287	0.422242	-0.169165	0.865667	0.932429	AHCYL2
2417.98	0.942383	0.2729	3.45321	0.000553951	0.00348958	AHDC1
2148.75	-1.07249	0.320355	-3.34781	0.000814519	0.00489947	AHI1
56114.8	1.33956	0.304072	4.4054	1.05589e-05	9.62429e-05	AHNAK
36406.3	2.13392	0.324118	6.58379	4.5861e-11	8.83607e-10	AHNAK2
63.186	1.60248	0.859584	1.86425	0.0622872	0.178046	AHR
291.089	-0.506958	0.192704	-2.63076	0.00851953	0.0369379	AHRR
16291.2	-0.293943	0.235484	-1.24825	0.211939	0.42087	AHSA1
1456.72	-0.751353	0.245072	-3.06585	0.00217052	0.0115212	AHSA2
0.163628	0.909069	4.08047	0.222785	0.823703	NA	AHSG
0.381745	2.00046	4.02207	0.497371	0.618928	NA	AHSP
0.659903	-1.43851	3.06508	-0.469321	0.63884	NA	AICDA
4777.34	0.12429	0.245903	0.505441	0.613249	0.794071	AIDA
0.147719	-1.01448	4.08047	-0.248619	0.803655	NA	AIF1
2008.49	0.112367	0.238781	0.470584	0.637938	0.80936	AIF1L
7462.13	-0.324507	0.229727	-1.41258	0.15778	0.347972	AIFM1
186.643	-0.680011	0.208596	-3.25994	0.00111434	0.0064649	AIFM2
8.68148	-0.189735	0.943529	-0.201091	0.840628	0.920635	AIFM3
978.238	-0.68272	0.170759	-3.99816	6.38366e-05	0.000502193	AIG1
580.796	7.12378	0.359373	19.8228	1.8926e-87	1.75192e-84	AIM1
89.584	3.04359	0.529253	5.75073	8.88615e-09	1.28414e-07	AIM1L
4.56512	3.83593	1.53214	2.50364	0.0122922	0.0500399	AIM2
3405.08	0.216725	0.189808	1.14181	0.253533	0.469954	AIMP1
3226.25	-0.547888	0.283856	-1.93016	0.0535867	0.159005	AIMP2
4364.47	-0.711542	0.329213	-2.16135	0.0306687	0.104008	AIP
0.55293	1.18031	4.02538	0.293219	0.769355	NA	AIPL1
0.674554	-0.174079	3.19647	-0.0544599	0.956569	NA	AIRE
0	NA	NA	NA	NA	NA	AJ239318.1
78.3534	4.38984	0.842719	5.20914	1.89719e-07	2.27909e-06	AJAP1
3430.07	0.632862	0.242322	2.61166	0.00901036	0.0385841	AJUBA
3461.52	1.3452	0.455044	2.95619	0.0031147	0.0156552	AK1
8773.83	0.277386	0.182467	1.52019	0.128462	0.30164	AK2
3405.49	1.27561	0.18095	7.0495	1.79557e-12	3.89555e-11	AK3
3970.62	0.571681	0.261504	2.18613	0.0288063	0.099091	AK4
1027.06	-1.20163	0.598417	-2.00801	0.0446418	0.138255	AK5
3122.9	-0.279401	0.209647	-1.33272	0.182623	0.383282	AK6
130.854	0.77392	0.265332	2.9168	0.00353648	0.0174025	AK7
120.566	0.401873	0.329207	1.22073	0.222188	0.432893	AK8
73.6453	1.00622	0.351502	2.86264	0.00420124	0.0201616	AK9
1945.05	0.16562	0.227211	0.728929	0.466045	0.682359	AKAP1
2950.61	-0.108759	0.367794	-0.295706	0.767454	0.882615	AKAP10
4388.27	-0.168094	0.583767	-0.287947	0.773387	0.885831	AKAP11
6470.73	1.66868	0.336012	4.96615	6.82943e-07	7.54088e-06	AKAP12
3980.42	0.396932	0.224132	1.77097	0.0765653	0.207537	AKAP13
0.295437	-1.7381	4.05464	-0.428668	0.668165	NA	AKAP14
2490.51	-0.331224	0.191552	-1.72916	0.0837798	0.221332	AKAP17A
375.659	4.25605	0.421917	10.0874	6.28004e-24	2.90661e-22	AKAP2
184.047	0.391917	0.342121	1.14555	0.251981	0.468255	AKAP3
0.190872	0.909069	4.08047	0.222785	0.823703	NA	AKAP4
640.813	-1.12197	0.306966	-3.65502	0.000257161	0.00176475	AKAP5
104.474	0.396551	0.391024	1.01413	0.310518	0.533466	AKAP6
6.02055	0.44214	0.920356	0.480402	0.630942	0.805018	AKAP7
3221.36	-0.316842	0.155872	-2.03271	0.0420817	0.132345	AKAP8
5293.81	-0.336844	0.223809	-1.50505	0.132311	0.307856	AKAP8L
2717.69	0.10723	0.215448	0.497707	0.618691	0.797479	AKAP9
3965.66	0.635784	0.296839	2.14185	0.0322055	0.107774	AKIP1
13182.1	-0.30868	0.182127	-1.69486	0.0901023	0.233082	AKIRIN1
2589.26	0.422234	0.259741	1.6256	0.104035	0.259099	AKIRIN2
524.108	-0.190208	0.417002	-0.456133	0.648294	0.815359	AKNA
5.67782	0.492349	1.26296	0.389836	0.696658	0.842726	AKNAD1
4790.18	0.357906	0.278608	1.28462	0.198924	0.404352	AKR1A1
7418	0.857001	0.22472	3.81365	0.000136931	0.000998489	AKR1B1
5.03469	5.7438	1.70948	3.35998	0.00077949	0.00472115	AKR1B10
0.191172	-1.01448	4.08047	-0.248619	0.803655	NA	AKR1B15
165.261	4.75053	0.532106	8.9278	4.34583e-19	1.50855e-17	AKR1C1
84.7986	2.46895	0.570488	4.32779	1.50613e-05	0.000133343	AKR1C2
320.073	7.31774	0.567477	12.8952	4.78901e-38	4.66635e-36	AKR1C3
0	NA	NA	NA	NA	NA	AKR1C4
0.669048	2.84387	3.81172	0.746085	0.455616	NA	AKR1D1
203.892	-0.184528	0.248154	-0.743604	0.457116	0.673836	AKR1E2
4935.02	-0.123885	0.187143	-0.661983	0.507982	0.717106	AKR7A2
19.2258	-0.584819	0.879603	-0.664867	0.506136	0.716016	AKR7A3
14138.7	-0.0197695	0.140856	-0.140353	0.888381	0.946186	AKT1
12953.8	-0.528837	0.279168	-1.89433	0.058181	0.168972	AKT1S1
10533.9	-0.0845643	0.307234	-0.275244	0.783129	0.891291	AKT2
1408.33	0.233753	0.148996	1.56885	0.116683	0.280887	AKT3
838.317	0.413322	0.205472	2.01157	0.0442652	0.137525	AKTIP
0.283018	1.62502	4.0556	0.400685	0.688652	NA	AL008723.1
15.6307	0.115885	1.24099	0.0933811	0.925601	0.964254	AL021546.6
0	NA	NA	NA	NA	NA	AL022578.1
19.9496	-0.618434	0.897984	-0.688692	0.491017	0.703226	AL023806.1
0.147719	-1.01448	4.08047	-0.248619	0.803655	NA	AL023875.1
0	NA	NA	NA	NA	NA	AL049794.1
0	NA	NA	NA	NA	NA	AL049872.1
0	NA	NA	NA	NA	NA	AL109927.1
0.191172	-1.01448	4.08047	-0.248619	0.803655	NA	AL133335.1
0	NA	NA	NA	NA	NA	AL133475.1
3.56734	-0.422246	1.29323	-0.326505	0.744042	0.86875	AL135745.1
0	NA	NA	NA	NA	NA	AL135842.1
5.50979	0.368761	1.20851	0.305138	0.760261	0.878527	AL136097.1
0	NA	NA	NA	NA	NA	AL137164.1
2.48492	0.712501	1.84324	0.386549	0.69909	0.844284	AL137860.1
0	NA	NA	NA	NA	NA	AL138706.2
0	NA	NA	NA	NA	NA	AL138751.1
0	NA	NA	NA	NA	NA	AL139333.1
0	NA	NA	NA	NA	NA	AL158839.1
0	NA	NA	NA	NA	NA	AL162426.1
140.81	-1.02847	0.394391	-2.60775	0.00911394	0.0389376	AL354822.1
0	NA	NA	NA	NA	NA	AL354828.1
0	NA	NA	NA	NA	NA	AL354828.2
0	NA	NA	NA	NA	NA	AL356131.3
0	NA	NA	NA	NA	NA	AL356135.1
0.662254	2.81885	3.80152	0.741506	0.458386	NA	AL356289.1
111.118	-0.171888	0.389037	-0.441829	0.658613	0.821824	AL356585.2
111.118	-0.171888	0.389037	-0.441829	0.658613	0.821824	AL356585.3
0	NA	NA	NA	NA	NA	AL357140.1
15.4157	0.727848	0.681736	1.06764	0.285684	0.506821	AL358852.1
0	NA	NA	NA	NA	NA	AL360294.1
25.1235	0.247383	0.573372	0.431453	0.666139	0.825632	AL365181.2
0	NA	NA	NA	NA	NA	AL365202.1
0	NA	NA	NA	NA	NA	AL365273.1
0	NA	NA	NA	NA	NA	AL445183.1
0	NA	NA	NA	NA	NA	AL513412.1
565.926	-0.768079	0.748424	-1.02626	0.304768	0.527589	AL513523.1
565.926	-0.768079	0.748424	-1.02626	0.304768	0.527589	AL513523.2
1730.29	-0.149202	0.233623	-0.638645	0.523054	0.728567	AL589743.1
0	NA	NA	NA	NA	NA	AL590235.1
0	NA	NA	NA	NA	NA	AL591806.1
60.5553	0.392722	0.516541	0.760292	0.44708	0.665646	AL592183.1
0	NA	NA	NA	NA	NA	AL596220.1
0	NA	NA	NA	NA	NA	AL645728.1
0	NA	NA	NA	NA	NA	AL645922.1
0	NA	NA	NA	NA	NA	AL662852.1
39.4176	-1.00126	0.513992	-1.94801	0.0514133	0.154157	AL928654.7
0	NA	NA	NA	NA	NA	AL929561.1
1890.72	0.438376	0.145696	3.00884	0.0026225	0.0134864	ALAD
13618.5	-0.348106	0.211632	-1.64486	0.099998	0.251991	ALAS1
0.14033	0.909069	4.08047	0.222785	0.823703	NA	ALAS2
1.3614	1.70339	1.89006	0.901237	0.367463	0.592477	ALB
254.86	1.42431	0.417335	3.41287	0.000642819	0.00398165	ALCAM
2582.78	-0.666121	0.308208	-2.16127	0.0306745	0.104008	ALDH16A1
7517.65	0.463037	0.195396	2.36974	0.0178006	0.0672854	ALDH18A1
9725.83	-0.500171	0.27152	-1.84211	0.0654585	0.184715	ALDH1A1
21.748	7.39263	1.09188	6.77055	1.28296e-11	2.60374e-10	ALDH1A2
166.961	4.52563	0.423132	10.6956	1.06783e-26	5.75801e-25	ALDH1A3
6070.61	-0.0172624	0.127118	-0.135798	0.891981	0.947631	ALDH1B1
7.23978	1.43472	0.920117	1.55928	0.11893	0.285042	ALDH1L1
109.122	-1.58009	0.535805	-2.949	0.00318802	0.0159643	ALDH1L2
1091.11	1.32345	0.348669	3.79571	0.000147222	0.00106329	ALDH2
0.713308	0.918312	2.56325	0.358261	0.720148	NA	ALDH3A1
6483.25	0.170326	0.2533	0.672429	0.501311	0.71191	ALDH3A2
148.891	3.35857	0.30829	10.8942	1.22855e-27	7.03439e-26	ALDH3B1
1.32382	-2.21001	2.83215	-0.78033	0.435197	0.65474	ALDH3B2
3293.11	0.166695	0.146087	1.14106	0.253844	0.470159	ALDH4A1
1997.29	-0.108313	0.32854	-0.329678	0.741643	0.867237	ALDH5A1
935.116	0.614786	0.432477	1.42155	0.155158	0.343737	ALDH6A1
4701.44	0.338708	0.171004	1.98071	0.0476241	0.145385	ALDH7A1
3517.79	-1.16497	0.253369	-4.59793	4.26719e-06	4.13914e-05	ALDH8A1
4913.02	-0.0497852	0.146363	-0.340148	0.733745	0.862577	ALDH9A1
78224.2	-0.305601	0.248685	-1.22887	0.219121	0.429366	ALDOA
5.84487	0.213618	0.864561	0.247082	0.804844	0.902406	ALDOB
60.1041	0.15359	0.582471	0.263686	0.792022	0.895418	ALDOC
2594.01	-0.156439	0.149095	-1.04926	0.294058	0.516037	ALG1
145.269	-0.109623	0.545556	-0.200939	0.840746	0.920644	ALG10
267.876	-0.0680758	0.595072	-0.114399	0.908921	0.955968	ALG10B
960.176	-0.0554316	0.445133	-0.124528	0.900897	0.952157	ALG11
2332.1	-0.0920564	0.168874	-0.545118	0.585673	0.776744	ALG12
2179.07	-0.653935	0.161287	-4.05449	5.02439e-05	0.000402482	ALG13
396.087	0.583189	0.422161	1.38144	0.167144	0.361964	ALG14
10.4419	-0.00612161	0.875873	-0.00698915	0.994424	0.997782	ALG1L
0.327256	1.80591	4.03841	0.447184	0.654742	NA	ALG1L2
3048.2	0.0737925	0.156537	0.471407	0.63735	0.808986	ALG2
3453.6	-0.35223	0.203309	-1.73249	0.083187	0.220255	ALG3
1303.97	-0.144617	0.320924	-0.450627	0.652258	0.817614	ALG5
461.738	-0.323921	0.223754	-1.44767	0.14771	0.331888	ALG6
2321.09	-0.434299	0.260657	-1.66617	0.0956795	0.244174	ALG8
960.008	-0.105098	0.344595	-0.30499	0.760374	0.878527	ALG9
10.2329	3.15221	1.04322	3.02163	0.00251418	0.0129976	ALK
931.936	-0.182991	0.243413	-0.751769	0.45219	0.670081	ALKBH1
1762.15	-0.608599	0.341715	-1.78101	0.0749108	0.204483	ALKBH2
896.652	0.0324528	0.379611	0.0854897	0.931872	0.967038	ALKBH3
1930.82	-0.481751	0.233963	-2.05909	0.0394859	0.125748	ALKBH4
9887.62	-0.443822	0.24485	-1.81263	0.0698889	0.193985	ALKBH5
1327.63	-0.312752	0.267398	-1.16961	0.242157	0.45682	ALKBH6
2550.67	-0.446144	0.261016	-1.70926	0.087403	0.228297	ALKBH7
1804.41	0.309981	0.243857	1.27115	0.203674	0.410799	ALKBH8
0.163628	0.909069	4.08047	0.222785	0.823703	NA	ALLC
1753.07	-0.283355	0.361748	-0.783294	0.433455	0.653172	ALMS1
10.0234	-0.088318	0.73973	-0.119392	0.904965	0.954348	ALOX12
81.4953	2.72357	0.377266	7.21923	5.22846e-13	1.18526e-11	ALOX12B
11.5869	-1.06918	0.91776	-1.16499	0.244024	0.45839	ALOX15
2.82134	-1.48306	1.36314	-1.08797	0.276607	0.49664	ALOX15B
83.2841	8.30811	1.30056	6.38811	1.67949e-10	2.9961e-09	ALOX5
29.5351	8.29761	1.49788	5.53959	3.03182e-08	4.09038e-07	ALOX5AP
253.384	3.60348	0.639056	5.63876	1.71282e-08	2.39823e-07	ALOXE3
13.4967	7.16543	1.53506	4.66785	3.04366e-06	3.0331e-05	ALPI
17.1273	4.4224	0.946122	4.67424	2.95047e-06	2.95082e-05	ALPK1
411.212	4.32987	1.21735	3.5568	0.000375406	0.00247822	ALPK2
58.2307	-0.107164	0.440653	-0.243194	0.807855	0.90352	ALPK3
213.93	3.31047	0.52683	6.28375	3.30508e-10	5.66557e-09	ALPL
7.20588	4.43044	1.35272	3.27522	0.00105581	0.00616612	ALPP
3.44447	1.67159	1.19444	1.39947	0.161671	0.353849	ALPPL2
3883.5	-0.0942986	0.354167	-0.266255	0.790043	0.894273	ALS2
90.7702	0.15383	0.528748	0.290932	0.771103	0.884813	ALS2CL
0.381745	2.00046	4.02207	0.497371	0.618928	NA	ALS2CR11
9.69865	0.882986	0.86685	1.01861	0.308386	0.531275	ALS2CR12
1137.44	-1.31353	0.196231	-6.6938	2.1745e-11	4.30302e-10	ALX1
3.48804	-3.15281	1.64502	-1.91658	0.0552915	0.162768	ALX3
14.6645	2.79654	0.753641	3.7107	0.000206684	0.0014494	ALX4
8111.56	-0.714111	0.281895	-2.53325	0.0113011	0.046597	ALYREF
1558.61	0.0981548	0.215872	0.454689	0.649333	0.81576	AMACR
38.5498	-1.79326	0.442058	-4.05663	4.97866e-05	0.000399204	AMBN
4.7056	5.64252	1.6849	3.34887	0.00081142	0.00488611	AMBP
4690.97	0.00786148	0.169982	0.0462489	0.963112	0.982116	AMBRA1
5147.62	0.759628	0.199889	3.80025	0.000144548	0.00104625	AMD1
66.1622	0.142156	0.413596	0.343706	0.731067	0.86079	AMDHD1
1605.44	-0.214979	0.157653	-1.36362	0.172689	0.369316	AMDHD2
3.55301	-4.26533	1.73922	-2.45243	0.0141895	0.0562493	AMELX
0	NA	NA	NA	NA	NA	AMELY
925.437	0.184597	0.330281	0.55891	0.576223	0.770239	AMER1
0	NA	NA	NA	NA	NA	AMER2
0.190872	0.909069	4.08047	0.222785	0.823703	NA	AMER3
7328.78	0.112717	0.279796	0.402855	0.687055	0.837202	AMFR
528.474	-1.10778	0.257354	-4.30451	1.67356e-05	0.000147072	AMH
2.20638	1.49608	1.84821	0.809477	0.418241	0.639344	AMHR2
868.526	-0.0951603	0.372457	-0.255493	0.798342	0.898701	AMIGO1
39.339	4.05069	0.735965	5.50391	3.71452e-08	4.93945e-07	AMIGO2
22.8557	1.22899	3.69118	0.332952	0.73917	0.865621	AMIGO3
960.438	0.202227	0.279465	0.723622	0.469298	0.684895	AMMECR1
3017.32	-0.00170819	0.166692	-0.0102476	0.991824	0.996489	AMMECR1L
28.9673	-0.663957	0.545504	-1.21714	0.223549	0.434326	AMN
677.204	-0.548671	0.242952	-2.25835	0.0239241	0.0853681	AMN1
6.51189	0.92646	1.03678	0.893596	0.371538	0.595877	AMOT
1153.41	7.55815	0.517703	14.5994	2.83379e-48	4.4544e-46	AMOTL1
3732.78	0.878493	0.211552	4.15262	3.28695e-05	0.000272203	AMOTL2
0	NA	NA	NA	NA	NA	AMPD1
8886.09	-0.307179	0.138105	-2.22425	0.0261319	0.0918004	AMPD2
220.834	5.19902	0.434892	11.9547	6.13275e-33	4.62371e-31	AMPD3
9.99875	1.87975	0.825001	2.27848	0.0226977	0.0817354	AMPH
48.9616	-0.4168	0.512539	-0.813207	0.416099	0.637874	AMT
92.7418	9.94918	1.26062	7.8923	2.96658e-15	8.19722e-14	AMTN
0.243599	0.183553	4.0708	0.0450902	0.964035	NA	AMY1A
10.9158	-2.02698	0.859708	-2.35776	0.0183856	0.0689647	AMY1B
0	NA	NA	NA	NA	NA	AMY1C
1.64797	-4.19921	2.95977	-1.41876	0.155969	0.344891	AMY2A
843.21	-1.92179	0.460195	-4.17604	2.96625e-05	0.000248235	AMY2B
8.00336	0.904237	0.999094	0.905057	0.365435	0.589894	AMZ1
5271.25	-0.296893	0.218311	-1.35995	0.173844	0.371168	AMZ2
4666.78	0.0610654	0.43549	0.140222	0.888484	0.946186	ANAPC1
520.28	-0.269519	0.288522	-0.93414	0.350232	0.57414	ANAPC10
3501.65	-0.0915133	0.312089	-0.293228	0.769348	0.883938	ANAPC11
3581.7	0.385804	0.263794	1.46252	0.143599	0.326197	ANAPC13
1913.28	-0.553731	0.48112	-1.15092	0.249765	0.465502	ANAPC15
3793.08	-0.0457152	0.295966	-0.154461	0.877246	0.939314	ANAPC16
2992.61	-0.0801182	0.16101	-0.497598	0.618767	0.797479	ANAPC2
1066.01	-0.0868136	0.236427	-0.367189	0.713478	0.852795	ANAPC4
7443.64	-0.0809692	0.203233	-0.398406	0.690331	0.838298	ANAPC5
4030.34	-0.115551	0.215003	-0.537441	0.590963	0.780639	ANAPC7
193.64	-1.1044	0.635581	-1.73763	0.0822763	0.218677	ANG
2035.21	0.0553442	0.335733	0.164846	0.869065	0.934458	ANGEL1
1576.85	-0.0227207	0.409722	-0.055454	0.955777	0.978732	ANGEL2
20.6646	0.397183	0.910801	0.436081	0.662778	0.823628	ANGPT1
3.63613	-0.864148	1.33675	-0.646453	0.517986	0.724752	ANGPT2
13.8865	3.67628	0.816264	4.50378	6.67552e-06	6.31974e-05	ANGPT4
0	NA	NA	NA	NA	NA	ANGPTL1
3.22104	0.856057	1.44459	0.592595	0.553452	0.754503	ANGPTL2
0	NA	NA	NA	NA	NA	ANGPTL3
4372.66	2.26354	0.526266	4.30112	1.69934e-05	0.000148867	ANGPTL4
0.601714	0.264613	4.05168	0.0653094	0.947928	NA	ANGPTL5
29.7857	-0.813825	0.458772	-1.77392	0.0760767	0.206717	ANGPTL6
3.78168	-0.0867808	1.59718	-0.0543338	0.956669	0.979318	ANGPTL7
2.21912	-1.16096	1.62834	-0.712971	0.475864	0.690305	ANGPTL8
0	NA	NA	NA	NA	NA	ANHX
380.124	2.42451	0.285395	8.49529	1.9744e-17	6.3143e-16	ANK1
154.628	0.377503	0.444418	0.849433	0.39564	0.619156	ANK2
18.7686	1.86932	0.862258	2.16793	0.0301638	0.102674	ANK3
54.0845	-0.50954	0.480204	-1.06109	0.288649	0.509855	ANKAR
369.021	0.203423	0.18294	1.11197	0.266153	0.484236	ANKDD1A
2.97959	-0.304187	1.62049	-0.187713	0.851102	0.925482	ANKDD1B
5.21886	2.29649	1.26021	1.82231	0.068408	0.191052	ANKEF1
2.74268	2.08118	1.53993	1.35148	0.176542	0.375005	ANKFN1
7914.36	0.120612	0.401997	0.300033	0.764152	0.880473	ANKFY1
668.859	5.53197	0.312619	17.6956	4.53589e-70	1.60802e-67	ANKH
5747.93	-0.270898	0.355556	-0.761901	0.446119	0.664891	ANKHD1
3645.7	-0.361851	0.186324	-1.94205	0.052131	0.15572	ANKHD1-EIF4EBP3
4324.48	0.134958	0.45765	0.294893	0.768075	0.883151	ANKIB1
4.7806	0.712766	1.2914	0.551932	0.580995	0.773144	ANKK1
51.3941	-0.603282	0.45691	-1.32035	0.186718	0.388886	ANKLE1
5118.61	0.149954	0.146394	1.02432	0.305683	0.528598	ANKLE2
608.965	-0.385468	0.166162	-2.31983	0.0203503	0.0746702	ANKMY1
1951.59	-0.461366	0.172375	-2.67653	0.00743898	0.032834	ANKMY2
1568.92	-0.32418	0.213326	-1.51965	0.1286	0.301831	ANKRA2
727.441	4.56569	1.31667	3.4676	0.000525135	0.00332566	ANKRD1
975.959	-0.323978	0.222546	-1.45578	0.145453	0.329106	ANKRD10
13680.2	-0.0149023	0.205753	-0.0724279	0.942261	0.972492	ANKRD11
1311.28	-0.181214	0.463124	-0.391287	0.695585	0.842101	ANKRD12
4194.94	2.73056	0.271514	10.0568	8.57472e-24	3.92506e-22	ANKRD13A
5143.94	-0.949037	0.196277	-4.8352	1.33014e-06	1.40538e-05	ANKRD13B
1529.86	0.184181	0.235971	0.780524	0.435083	0.65474	ANKRD13C
2465.86	-0.657366	0.276479	-2.37763	0.0174242	0.0661175	ANKRD13D
628.141	-0.691031	0.19167	-3.60532	0.000311774	0.00210144	ANKRD16
10394.2	-0.0658847	0.393603	-0.167389	0.867064	0.933168	ANKRD17
3.95947	-0.41708	2.23913	-0.186269	0.852234	0.925988	ANKRD18A
4.31213	2.39468	1.58755	1.50841	0.13145	0.306397	ANKRD18B
8.04853	4.52017	1.38155	3.27182	0.00106857	0.00622537	ANKRD2
7.00995	2.16065	1.36937	1.57784	0.114602	0.277061	ANKRD20A1
2.07365	1.57671	2.41047	0.654108	0.513042	0.720848	ANKRD20A2
1.62551	-0.275959	1.993	-0.138464	0.889874	0.947204	ANKRD20A3
5.42617	-0.539904	1.07163	-0.503816	0.61439	0.794673	ANKRD20A4
0	NA	NA	NA	NA	NA	ANKRD22
106.03	-0.613746	0.340068	-1.80478	0.0711098	0.196783	ANKRD23
487.328	0.298242	0.287389	1.03777	0.299379	0.521696	ANKRD24
656.609	0.153611	0.197749	0.776801	0.437276	0.656801	ANKRD26
2272.06	-0.00416031	0.234825	-0.0177166	0.985865	0.993851	ANKRD27
4286.64	-0.385133	0.374696	-1.02786	0.304018	0.526632	ANKRD28
6.17257	-0.141602	1.3694	-0.103404	0.917642	0.960628	ANKRD29
0.14033	0.909069	4.08047	0.222785	0.823703	NA	ANKRD30A
4.67146	5.63663	2.36882	2.37951	0.0173358	0.0658119	ANKRD30B
0	NA	NA	NA	NA	NA	ANKRD30BL
15.5522	0.0963284	0.602207	0.159959	0.872913	0.936662	ANKRD31
0.558275	1.66355	3.25689	0.510777	0.609507	NA	ANKRD33
311.605	1.12849	0.29151	3.87118	0.000108309	0.000808896	ANKRD33B
570.386	-1.3158	0.181913	-7.23312	4.72026e-13	1.07886e-11	ANKRD34A
34.3665	-0.998952	0.481631	-2.07411	0.0380695	0.122526	ANKRD34B
0.802767	3.09978	3.57426	0.867251	0.385805	NA	ANKRD34C
0.295437	-1.7381	4.05464	-0.428668	0.668165	NA	ANKRD35
80.3453	0.0684344	0.303322	0.225616	0.8215	0.910943	ANKRD36
65.5244	-0.254455	0.333009	-0.764107	0.444804	0.663443	ANKRD36B
52.3137	-0.160445	0.59133	-0.271329	0.786138	0.89226	ANKRD36C
227.815	0.116927	0.388222	0.301185	0.763273	0.879993	ANKRD37
787.438	-0.722088	0.362618	-1.99132	0.0464457	0.142519	ANKRD39
3258.59	0.0738599	0.224653	0.328773	0.742327	0.867733	ANKRD40
1499.98	0.228156	0.246871	0.924193	0.355386	0.579397	ANKRD42
60.557	1.77212	0.838497	2.11344	0.0345628	0.113947	ANKRD44
5.55586	-0.371188	0.929276	-0.399438	0.68957	0.838011	ANKRD45
410.903	0.213001	0.406044	0.524576	0.599878	0.786774	ANKRD46
361.343	-0.0146124	0.201447	-0.0725373	0.942174	0.972465	ANKRD49
3097.36	0.630544	0.520062	1.21244	0.225344	0.436267	ANKRD50
9189.91	-0.125391	0.342082	-0.366551	0.713954	0.853075	ANKRD52
5.43477	0.682743	1.42315	0.479742	0.631411	0.805125	ANKRD53
2668.99	-0.658908	0.218376	-3.01731	0.00255033	0.0131641	ANKRD54
0.163628	0.909069	4.08047	0.222785	0.823703	NA	ANKRD55
79.2245	1.33638	0.431152	3.09955	0.00193814	0.0104442	ANKRD6
0	NA	NA	NA	NA	NA	ANKRD60
15.9042	-0.186316	0.640714	-0.290794	0.771209	0.884813	ANKRD61
6.19255	-1.30383	1.25184	-1.04153	0.29763	0.519715	ANKRD62
0.444529	2.26043	4.0033	0.564642	0.572317	NA	ANKRD63
21.9418	0.081142	0.556577	0.145788	0.884089	0.94367	ANKRD65
0	NA	NA	NA	NA	NA	ANKRD66
5.28401	1.32979	1.60646	0.827781	0.407795	0.630362	ANKRD7
2073.69	-0.0168887	0.254308	-0.0664104	0.947051	0.974661	ANKRD9
1890.54	0.102824	0.367292	0.27995	0.779516	0.888984	ANKS1A
198.906	-1.30297	0.43246	-3.01294	0.00258731	0.0133261	ANKS1B
572.961	-0.29201	0.362046	-0.806556	0.419922	0.640962	ANKS3
0.173173	-1.01448	4.08047	-0.248619	0.803655	NA	ANKS4B
2903.36	-0.297386	0.155852	-1.90813	0.0563748	0.165082	ANKS6
1.08107	1.86985	2.23976	0.834846	0.403804	0.627617	ANKUB1
1584.89	0.136957	0.232294	0.589585	0.555469	0.756137	ANKZF1
3380.3	-1.05127	0.391422	-2.68576	0.00723642	0.0320503	ANLN
10.6464	5.15242	1.43757	3.58412	0.000338212	0.00225954	ANO1
1901.53	0.969	0.19882	4.87376	1.09493e-06	1.17323e-05	ANO10
1.75485	2.33161	2.61011	0.893301	0.371696	0.595926	ANO2
17.3131	0.741542	1.08542	0.683188	0.494488	0.70645	ANO3
23.1652	3.95809	0.863688	4.58278	4.58841e-06	4.43457e-05	ANO4
11.0322	-1.58553	0.925946	-1.71234	0.0868349	0.227098	ANO5
7661.07	0.351207	0.301786	1.16376	0.244521	0.458794	ANO6
155.194	-0.52546	0.244965	-2.14504	0.0319499	0.107181	ANO7
1240.34	-0.863412	0.347745	-2.48289	0.0130323	0.0524248	ANO8
10.9169	0.16807	0.667813	0.251672	0.801294	0.900092	ANO9
7.07916	1.25723	1.12815	1.11442	0.265097	0.483041	ANOS1
12483.5	0.00669574	0.170915	0.0391758	0.96875	0.984334	ANP32A
14709.5	-0.545381	0.342846	-1.59074	0.111667	0.272375	ANP32B
15.2445	-0.359385	0.545296	-0.659064	0.509855	0.718714	ANP32D
3341.75	-0.536591	0.340044	-1.578	0.114565	0.277061	ANP32E
25.5822	0.92981	0.586975	1.58407	0.113178	0.274933	ANPEP
6711.6	1.90465	0.136266	13.9774	2.14045e-44	2.68152e-42	ANTXR1
435.309	2.65635	0.246417	10.7799	4.28538e-27	2.36434e-25	ANTXR2
0.303933	1.7126	4.04704	0.423174	0.672169	NA	ANTXRL
18132.8	0.808082	0.197362	4.09442	4.23222e-05	0.000344659	ANXA1
15.2625	1.86146	0.852746	2.1829	0.0290433	0.0997361	ANXA10
4465.8	-0.230047	0.483777	-0.475524	0.634414	0.807224	ANXA11
11.3323	6.91445	1.39377	4.96096	7.01449e-07	7.74009e-06	ANXA13
108374	1.25686	0.404369	3.1082	0.00188232	0.0101829	ANXA2
4.69777	-1.61054	1.27642	-1.26176	0.207034	0.415155	ANXA2R
86.4086	6.34309	0.959845	6.60845	3.8836e-11	7.52425e-10	ANXA3
6924.42	0.560405	0.167631	3.34308	0.000828533	0.00497452	ANXA4
66238.7	0.179419	0.266447	0.673375	0.500709	0.711479	ANXA5
2262.76	1.03855	0.278907	3.72362	0.000196385	0.00138241	ANXA6
5776.1	0.573992	0.167194	3.43309	0.000596754	0.0037296	ANXA7
1106.41	8.93404	0.568084	15.7266	9.93824e-56	2.09609e-53	ANXA8
1052.91	11.8232	1.05533	11.2033	3.92649e-29	2.4688e-27	ANXA8L1
128.023	0.430525	0.263106	1.63632	0.101773	0.254825	ANXA9
5.82608	5.95978	1.63016	3.65595	0.000256235	0.00175985	AOAH
36.8324	4.37761	1.18043	3.7085	0.000208491	0.001459	AOC1
253.642	-0.427531	0.309202	-1.38269	0.166759	0.361413	AOC2
66.1283	-1.31787	0.519684	-2.53591	0.0112155	0.046359	AOC3
184.407	7.08994	0.676449	10.4811	1.05496e-25	5.442e-24	AOX1
64.8944	-0.517419	0.471961	-1.09632	0.27294	0.492382	AP000275.65
8.12197	0.681	1.04066	0.654392	0.51286	0.720791	AP000295.9
0	NA	NA	NA	NA	NA	AP000304.12
1.86783	4.311	2.24886	1.91697	0.0552416	0.16265	AP000322.53
27.3734	0.844326	3.73245	0.226212	NA	NA	AP000349.1
27.3734	0.844326	3.73245	0.226212	NA	NA	AP000349.2
6.43187	-2.25278	2.17345	-1.0365	0.299971	0.521832	AP000350.10
0	NA	NA	NA	NA	NA	AP000351.1
0	NA	NA	NA	NA	NA	AP000687.1
7.90132	-1.16961	0.836408	-1.39837	0.162001	0.354119	AP000721.4
0	NA	NA	NA	NA	NA	AP000769.1
0.679744	-1.49524	3.05123	-0.490045	0.624102	NA	AP000866.1
0	NA	NA	NA	NA	NA	AP001888.1
5.16225	0.33813	1.18976	0.284201	0.776256	0.887287	AP002884.2
0	NA	NA	NA	NA	NA	AP002962.1
944.029	-0.61139	0.637224	-0.959459	0.337328	0.56179	AP003419.11
0	NA	NA	NA	NA	NA	AP005242.1
4.56695	-1.60149	1.11068	-1.4419	0.149332	0.334468	AP006285.1
4.56695	-1.60149	1.11068	-1.4419	0.149332	0.334468	AP006285.2
1109.01	0.0270955	0.396549	0.0683282	0.945524	0.973883	AP1AR
10018.8	-0.0358876	0.196757	-0.182395	0.855272	0.927058	AP1B1
9450.57	-0.261231	0.395376	-0.660715	0.508795	0.71801	AP1G1
966.025	-0.00824247	0.295314	-0.0279108	0.977733	0.989011	AP1G2
9775.4	-0.162311	0.143045	-1.13468	0.256509	0.473202	AP1M1
12.7958	3.89725	1.03134	3.77882	0.000157576	0.00113267	AP1M2
17821.3	0.483891	0.204335	2.36813	0.0178782	0.0675481	AP1S1
633.375	2.04768	0.230595	8.87999	6.68646e-19	2.29238e-17	AP1S2
3486.17	-0.25505	0.503171	-0.506885	0.612235	0.793486	AP1S3
13330.3	0.314016	0.1931	1.62619	0.10391	0.25899	AP2A1
8482.52	-0.319816	0.166783	-1.91756	0.0551672	0.162517	AP2A2
24111.9	-0.156249	0.221315	-0.706004	0.480186	0.693736	AP2B1
41202	0.517103	0.204174	2.53266	0.01132	0.0466637	AP2M1
6970.92	-0.185981	0.400372	-0.464521	0.642274	0.81136	AP2S1
5842.21	-0.0651927	0.156806	-0.415754	0.67759	0.831738	AP3B1
635.147	-0.400971	0.262537	-1.52729	0.126688	0.298736	AP3B2
22790.3	-0.135051	0.123151	-1.09663	0.272802	0.492302	AP3D1
4015.11	0.134026	0.40973	0.327107	0.743587	0.868508	AP3M1
1486.77	-0.217441	0.240522	-0.904035	0.365977	0.590654	AP3M2
3127.65	-0.251928	0.296089	-0.850851	0.394852	0.618562	AP3S1
3068.73	0.417842	0.313108	1.3345	0.18204	0.382539	AP3S2
1002.62	-0.00870643	0.298139	-0.0292026	0.976703	0.988509	AP4B1
961.247	0.280669	0.198389	1.41474	0.157144	0.346885	AP4E1
2145.33	-0.247249	0.234102	-1.05616	0.290894	0.5125	AP4M1
565.099	0.0552805	0.256106	0.21585	0.829105	0.915234	AP4S1
4453.33	-0.703057	0.240456	-2.92384	0.00345739	0.0171144	AP5B1
2659.27	0.0916256	0.449273	0.203942	0.838399	0.919705	AP5M1
1568.08	-0.203403	0.222038	-0.916073	0.359629	0.583744	AP5S1
4240.09	-0.269147	0.336343	-0.800216	0.423586	0.64398	AP5Z1
1326.22	-0.052077	0.262954	-0.198046	0.843009	0.921635	APAF1
16.0563	-0.1038	0.765835	-0.135539	0.892186	0.947631	APBA1
1244.05	1.69743	0.293309	5.78716	7.15878e-09	1.0454e-07	APBA2
1451.68	0.0313362	0.16933	0.18506	0.853182	0.926407	APBA3
2576.35	0.406432	0.255956	1.5879	0.112309	0.273462	APBB1
99.8061	1.69745	0.299386	5.66979	1.42974e-08	2.02571e-07	APBB1IP
3345.31	-0.0507679	0.520087	-0.0976142	0.922239	0.962565	APBB2
1558.95	-1.37072	0.316057	-4.33695	1.44474e-05	0.000128454	APBB3
3828.2	0.474058	0.476224	0.995453	0.319516	0.542744	APC
2620.31	-1.48706	0.544571	-2.7307	0.00631997	0.0285607	APC2
0.474637	1.85752	4.02494	0.461503	0.644438	NA	APCDD1
413.534	12.1076	1.24242	9.7452	1.934e-22	8.13858e-21	APCDD1L
0.764689	-3.07097	3.96618	-0.774289	0.43876	NA	APCS
9658.92	-0.184149	0.145629	-1.26451	0.206048	0.413895	APEH
0	NA	NA	NA	NA	NA	APELA
18451.5	-0.148531	0.134125	-1.10741	0.268116	0.486146	APEX1
3115.33	-0.194116	0.231547	-0.838343	0.401838	0.625402	APEX2
14132.2	0.0768275	0.138726	0.553808	0.57971	0.772175	APH1A
1017.76	0.928057	0.163882	5.66297	1.48775e-08	2.09898e-07	APH1B
6948.67	0.0399685	0.253254	0.15782	0.874598	0.937624	API5
856.348	-0.498151	0.198536	-2.50912	0.0121031	0.0494511	APIP
667.358	-0.667067	0.220707	-3.02242	0.00250766	0.0129719	APITD1
66.418	-0.428125	0.536844	-0.797485	0.42517	0.645248	APITD1-CORT
282.687	0.0586159	0.23437	0.250099	0.802511	0.900918	APLF
269.206	5.37051	0.434169	12.3696	3.81535e-35	3.16276e-33	APLN
54.8567	6.79258	0.921021	7.37505	1.64279e-13	3.86066e-12	APLNR
13675.5	-1.54443	0.413293	-3.73689	0.000186311	0.00131706	APLP1
28529.5	0.66209	0.201788	3.28111	0.00103399	0.00605563	APLP2
8096.71	0.0494964	0.198904	0.248846	0.80348	0.901571	APMAP
42.7934	1.13872	0.553075	2.05889	0.0395052	0.125786	APOA1
8306.31	-0.594072	0.28514	-2.08344	0.0372112	0.120508	APOA1BP
1.93191	-2.73191	2.14851	-1.27154	0.203538	0.410687	APOA2
1.02135	2.20193	2.2766	0.967203	0.333443	NA	APOA4
1.6697	3.0179	2.63281	1.14627	0.251685	0.467999	APOA5
0.163628	0.909069	4.08047	0.222785	0.823703	NA	APOB
0	NA	NA	NA	NA	NA	APOBEC1
0.715717	1.61088	3.91127	0.411856	0.680445	NA	APOBEC2
1.76098	4.23527	2.16181	1.95913	0.0500973	0.151163	APOBEC3A
229.189	0.985804	0.227931	4.325	1.52529e-05	0.000134896	APOBEC3B
1402.25	4.72728	0.208383	22.6856	6.22206e-114	1.15191e-110	APOBEC3C
3.97387	1.46765	1.46164	1.00411	0.315326	0.537935	APOBEC3D
578.01	-0.0602571	0.212014	-0.284214	0.776247	0.887287	APOBEC3F
16.3584	1.69004	0.697337	2.42357	0.015369	0.0598312	APOBEC3G
12.1204	3.67289	0.973293	3.77367	0.000160862	0.0011558	APOBEC3H
0.30394	1.71262	4.04704	0.423179	0.672164	NA	APOBEC4
18.4511	-0.927079	0.731801	-1.26685	0.20521	0.413134	APOBR
110.365	-0.545377	0.562775	-0.969086	0.332502	0.557209	APOC1
0	NA	NA	NA	NA	NA	APOC2
1.967	4.38559	2.90169	1.51139	0.130689	0.305363	APOC3
0	NA	NA	NA	NA	NA	APOC4
0	NA	NA	NA	NA	NA	APOC4-APOC2
53.2407	4.08964	0.564967	7.23872	4.52924e-13	1.03662e-11	APOD
6595.45	0.125137	0.31883	0.392488	0.694697	0.841482	APOE
0	NA	NA	NA	NA	NA	APOF
3.22384	5.10711	1.87724	2.72055	0.00651738	0.0293414	APOH
550.746	6.29838	0.367645	17.1317	8.61204e-66	2.65729e-63	APOL1
2601.2	0.900838	0.257932	3.49253	0.000478464	0.00307213	APOL2
131.932	6.09209	0.584235	10.4275	1.85764e-25	9.43659e-24	APOL3
2.68411	4.82251	1.94668	2.4773	0.0132381	0.0530736	APOL4
0.4844	-0.89016	3.35414	-0.265391	0.790708	NA	APOL5
164.926	3.88116	0.508467	7.63307	2.2922e-14	5.88484e-13	APOL6
150.864	0.142841	0.379497	0.376395	0.706623	0.848987	APOLD1
80.952	-0.0536274	0.459304	-0.116758	0.907052	0.955153	APOM
1912.07	-0.778397	0.300505	-2.5903	0.00958931	0.0406661	APOO
1560.95	-0.0395454	0.433767	-0.0911674	0.92736	0.965126	APOOL
1800.43	-0.208051	0.292865	-0.710402	0.477455	0.691316	APOPT1
78778.4	0.681736	0.234922	2.90196	0.0037083	0.0181036	APP
3294.62	0.0296062	0.448451	0.0660188	0.947363	0.974922	APPBP2
2801.88	0.0320796	0.349167	0.0918746	0.926798	0.964813	APPL1
2002.03	0.428884	0.249813	1.71682	0.0860123	0.225584	APPL2
12982.6	-0.338793	0.268995	-1.25948	0.207859	0.41619	APRT
2787.55	-0.120735	0.13815	-0.873942	0.38215	0.606672	APTX
6018.46	8.19387	0.649244	12.6206	1.62507e-36	1.47961e-34	AQP1
1.57004	3.02456	2.57087	1.17647	0.239407	0.453728	AQP10
533.357	1.92049	0.172674	11.1221	9.79878e-29	5.95866e-27	AQP11
0	NA	NA	NA	NA	NA	AQP12A
0.562566	-0.550609	4.04595	-0.136089	0.891751	NA	AQP12B
5.47359	5.84372	1.64192	3.55907	0.000372175	0.00245786	AQP2
1360.41	4.69795	0.238707	19.6809	3.14596e-86	2.75885e-83	AQP3
0	NA	NA	NA	NA	NA	AQP4
0	NA	NA	NA	NA	NA	AQP5
8.69201	2.5907	0.936332	2.76686	0.00565991	0.0259652	AQP6
7.18374	5.60579	1.41018	3.97524	7.03091e-05	0.000548194	AQP7
3.50612	0.0774633	1.31637	0.0588462	0.953075	0.97773	AQP8
0	NA	NA	NA	NA	NA	AQP9
4752.56	-0.27214	0.31912	-0.852782	0.39378	0.617406	AQR
6.17286	4.52324	1.50884	2.99783	0.00271913	0.0139147	AR
6611.21	-0.271672	0.258122	-1.05249	0.292573	0.514332	ARAF
7798.35	0.222883	0.17425	1.2791	0.200862	0.406867	ARAP1
40.1388	-0.998618	0.780145	-1.28004	0.20053	0.406432	ARAP2
1.72967	3.02163	2.4362	1.24031	0.214862	0.424073	ARAP3
1159.68	1.27848	0.243021	5.26078	1.43443e-07	1.7561e-06	ARC
13940.3	0.0954013	0.261905	0.364259	0.715665	0.853695	ARCN1
169.99	-0.903152	0.360932	-2.50228	0.0123398	0.0501722	AREG
6543.67	0.555917	0.256474	2.16753	0.0301941	0.102756	AREL1
27086.7	-0.121574	0.222163	-0.54723	0.584221	0.775579	ARF1
19445	-0.103903	0.265118	-0.391914	0.695121	0.841723	ARF3
16755.7	-0.102138	0.296606	-0.344354	0.73058	0.860459	ARF4
9873.57	-0.446314	0.224936	-1.98418	0.047236	0.144386	ARF5
6057.17	0.737411	0.160487	4.59484	4.33074e-06	4.19527e-05	ARF6
10390.2	-0.20996	0.234568	-0.895091	0.370738	0.595225	ARFGAP1
6150.06	-0.0296709	0.23182	-0.127991	0.898156	0.950456	ARFGAP2
2787.08	0.122155	0.144677	0.84433	0.398485	0.621889	ARFGAP3
2880.65	0.0805766	0.212818	0.378617	0.704972	0.848166	ARFGEF1
5215.06	-0.178147	0.519306	-0.343049	0.731562	0.86119	ARFGEF2
2653.66	-0.881219	0.491709	-1.79216	0.0731079	0.201006	ARFGEF3
2131.16	0.038307	0.333389	0.114902	0.908523	0.955851	ARFIP1
6509.38	0.161878	0.238241	0.67947	0.49684	0.708618	ARFIP2
2523.04	-0.270034	0.332401	-0.812373	0.416578	0.638143	ARFRP1
1.23687	-0.11716	1.9572	-0.0598612	0.952266	0.977553	ARG1
245.369	1.02469	0.257425	3.98052	6.87644e-05	0.000537408	ARG2
0	NA	NA	NA	NA	NA	ARGFX
3017.26	-0.100071	0.189354	-0.52849	0.59716	0.784395	ARGLU1
6816.39	0.294463	0.164609	1.78886	0.073637	0.201766	ARHGAP1
1711.97	0.867039	0.42085	2.06021	0.0393785	0.125478	ARHGAP10
1446.89	-1.17506	0.686085	-1.71271	0.0867661	0.226954	ARHGAP11A
149.424	-0.975416	0.421179	-2.31592	0.0205627	0.0753829	ARHGAP11B
3848.01	-0.112727	0.363832	-0.309833	0.756688	0.876525	ARHGAP12
0.14033	0.909069	4.08047	0.222785	0.823703	NA	ARHGAP15
8574.5	-0.504511	0.230798	-2.18594	0.0288198	0.099091	ARHGAP17
86.098	3.23828	0.753518	4.29754	1.72704e-05	0.000150897	ARHGAP18
1778.76	-1.12412	0.343817	-3.26954	0.00107723	0.00626817	ARHGAP19
16.554	0.393799	1.09375	0.360044	0.718814	0.854624	ARHGAP19-SLIT1
221.39	2.75568	0.54906	5.01891	5.19663e-07	5.85834e-06	ARHGAP20
4153.13	1.30412	0.293677	4.44065	8.96861e-06	8.27436e-05	ARHGAP21
190.722	4.42716	0.513012	8.62975	6.14882e-18	2.01676e-16	ARHGAP22
887.507	1.39414	0.318353	4.37921	1.19109e-05	0.000107508	ARHGAP23
21.9345	3.46216	0.699865	4.9469	7.54058e-07	8.27675e-06	ARHGAP24
0.492752	-1.2511	4.03367	-0.310164	0.756436	NA	ARHGAP25
129.422	3.07029	0.428012	7.17339	7.31649e-13	1.62543e-11	ARHGAP26
3364.76	-0.486676	0.268477	-1.81273	0.0698734	0.193975	ARHGAP27
48.3276	0.234481	0.679936	0.344858	0.730201	0.860257	ARHGAP28
15283.3	-0.22006	0.385913	-0.570233	0.56852	0.764727	ARHGAP29
77.8958	1.12928	0.463857	2.43455	0.0149102	0.0584136	ARHGAP30
238.299	2.82295	0.400287	7.05231	1.75973e-12	3.82277e-11	ARHGAP31
2548.85	0.175984	0.490102	0.359077	0.719538	0.855115	ARHGAP32
608.625	-0.961895	0.31259	-3.07718	0.00208968	0.0111377	ARHGAP33
9118.95	0.0185172	0.373505	0.0495769	0.96046	0.981128	ARHGAP35
700.953	6.18774	0.424566	14.5743	4.09401e-48	6.31615e-46	ARHGAP36
1732.45	-0.666144	0.220377	-3.02275	0.00250488	0.0129616	ARHGAP39
679.413	-1.15887	0.529507	-2.18859	0.0286269	0.0986421	ARHGAP4
27.4076	8.19186	1.27069	6.44679	1.14247e-10	2.08955e-09	ARHGAP40
9.8673	1.37052	0.86277	1.58851	0.112172	0.273206	ARHGAP42
368.114	0.385155	0.240871	1.59901	0.109819	0.268867	ARHGAP44
2104.21	2.27225	0.391885	5.79827	6.70027e-09	9.81018e-08	ARHGAP5
3.2415	-0.0842625	1.44237	-0.0584195	0.953414	0.97773	ARHGAP6
411.559	-0.872992	0.252357	-3.45936	0.000541469	0.00341741	ARHGAP8
21.1324	-0.377159	0.698496	-0.539958	0.589226	0.779305	ARHGAP9
24635.5	-0.111042	0.290694	-0.381989	0.70247	0.847097	ARHGDIA
202.275	8.49686	1.08229	7.85084	4.13258e-15	1.12328e-13	ARHGDIB
206.024	-0.565705	0.534137	-1.0591	0.289554	0.511021	ARHGDIG
4778.52	0.209098	0.345506	0.605194	0.54505	0.747908	ARHGEF1
3867.08	-0.265297	0.279367	-0.949635	0.342298	0.565929	ARHGEF10
1022.53	0.412228	0.275186	1.498	0.134134	0.31095	ARHGEF10L
4364.32	-0.212061	0.271217	-0.781886	0.434281	0.654066	ARHGEF11
11114.8	0.331516	0.451337	0.734521	0.462631	0.678852	ARHGEF12
4.56529	0.201371	1.78968	0.112518	0.910413	0.956862	ARHGEF15
247.726	-0.279661	0.204449	-1.36787	0.171352	0.367731	ARHGEF16
3092.19	0.0946804	0.166136	0.569896	0.568748	0.764972	ARHGEF17
3541.11	-0.0840764	0.27746	-0.303022	0.761873	0.879384	ARHGEF18
340.537	-0.0935139	0.219433	-0.426161	0.66999	0.827534	ARHGEF19
3961.69	0.968513	0.157988	6.13028	8.77246e-10	1.43582e-08	ARHGEF2
1824.75	-0.126103	0.283361	-0.445027	0.6563	0.820289	ARHGEF25
1775.14	-1.13183	0.32429	-3.49017	0.000482716	0.00309466	ARHGEF26
1514.24	1.21526	0.360148	3.37435	0.000739908	0.00450762	ARHGEF28
1202.72	2.2071	0.22633	9.7517	1.81413e-22	7.69136e-21	ARHGEF3
9.95871	3.08504	0.928559	3.3224	0.000892462	0.00531458	ARHGEF33
0.191172	-1.01448	4.08047	-0.248619	0.803655	NA	ARHGEF35
51.1657	-0.87617	0.395931	-2.21294	0.0269018	0.0936561	ARHGEF37
0.871026	2.278	3.75642	0.606427	0.544231	NA	ARHGEF38
376.615	-1.42366	0.274633	-5.18387	2.17331e-07	2.59768e-06	ARHGEF39
227.931	3.06767	0.440344	6.96652	3.24883e-12	6.93111e-11	ARHGEF4
3862.99	0.426084	0.158299	2.69164	0.00711008	0.0316337	ARHGEF40
0.911374	-2.11695	2.84432	-0.74427	0.456713	NA	ARHGEF5
19.4746	2.04938	0.648472	3.16033	0.00157593	0.00871621	ARHGEF6
3077.54	-0.0717418	0.284643	-0.252041	0.801009	0.900092	ARHGEF7
1116.65	-0.265836	0.198489	-1.33929	0.180475	0.380642	ARHGEF9
14430.2	-0.60923	0.296854	-2.05229	0.0401414	0.127276	ARID1A
9336.03	-0.4891	0.382484	-1.27875	0.200986	0.406971	ARID1B
3068.57	-0.384179	0.367478	-1.04545	0.295817	0.518188	ARID2
1568.98	-0.2252	0.266855	-0.843905	0.398723	0.622111	ARID3A
1392.41	-1.34341	0.223593	-6.00831	1.87463e-09	2.96912e-08	ARID3B
8.41878	-0.083798	0.743911	-0.112645	0.910312	0.956827	ARID3C
1215.08	-0.422246	0.419391	-1.00681	0.314027	0.536962	ARID4A
3775.42	-0.140715	0.414975	-0.339092	0.73454	0.862879	ARID4B
737.268	2.45007	0.30681	7.98565	1.39788e-15	3.96114e-14	ARID5A
3525.22	-0.360625	0.39263	-0.918486	0.358365	0.582316	ARID5B
6113.96	-0.0609088	0.266864	-0.228239	0.81946	0.910014	ARIH1
7321.21	-0.0969575	0.189367	-0.512009	0.608644	0.791474	ARIH2
145.082	-0.658757	0.299528	-2.19931	0.0278556	0.0964725	ARIH2OS
5059.06	0.0676307	0.24103	0.280591	0.779024	0.888622	ARL1
173.913	-0.479091	0.416792	-1.14947	0.250361	0.466366	ARL10
0.561322	2.6004	3.98326	0.652831	0.513865	NA	ARL11
0.755788	-1.3353	2.9194	-0.457387	0.647393	NA	ARL13A
1710.74	-0.282662	0.453275	-0.6236	0.53289	0.737644	ARL13B
6.43529	0.93869	0.894199	1.04975	0.293831	0.515837	ARL14
1570.46	-0.0695828	0.17621	-0.394885	0.692928	0.840349	ARL14EP
0.173173	-1.01448	4.08047	-0.248619	0.803655	NA	ARL14EPL
68.1147	2.96796	0.709445	4.1835	2.87061e-05	0.000240594	ARL15
2423.05	-0.164418	0.277966	-0.591503	0.554183	0.75495	ARL16
161.476	-0.238916	0.442316	-0.540148	0.589095	0.779254	ARL17A
196.866	-0.474199	0.222791	-2.12845	0.0332995	0.11062	ARL17B
6974.05	-0.362787	0.26442	-1.37201	0.17006	0.366044	ARL2
14.1758	0.341676	3.55358	0.09615	0.923401	0.963052	ARL2-SNX15
5174.95	0.0659897	0.168545	0.391525	0.695409	0.841949	ARL2BP
2848.31	-0.403743	0.226372	-1.78354	0.0744986	0.203625	ARL3
138.67	0.385724	0.387227	0.996118	0.319193	0.542582	ARL4A
12227.1	-0.688932	0.232416	-2.96422	0.00303455	0.0152985	ARL4C
734.478	2.92305	0.447092	6.53792	6.23807e-11	1.1794e-09	ARL4D
1810.43	-0.309854	0.298813	-1.03695	0.29976	0.521832	ARL5A
2868.72	-0.369392	0.302401	-1.22153	0.221886	0.432608	ARL5B
0.537812	-2.56748	3.99071	-0.643365	0.519987	NA	ARL5C
252.554	-0.364872	0.262278	-1.39117	0.164175	0.357486	ARL6
8348.99	-0.13786	0.184817	-0.745926	0.455712	0.672847	ARL6IP1
8088.39	-0.203819	0.395159	-0.515788	0.606002	0.790178	ARL6IP4
1861.8	2.71569	0.189295	14.3463	1.12356e-46	1.62789e-44	ARL6IP5
662.733	-0.233347	0.229343	-1.01746	0.308935	0.531543	ARL6IP6
3512.4	-0.343765	0.323409	-1.06294	0.287808	0.509008	ARL8A
6598.48	0.13392	0.170719	0.784446	0.432778	0.652672	ARL8B
2.54477	-1.62834	1.63887	-0.993576	0.320429	0.543907	ARL9
1615.93	-0.0427761	0.400693	-0.106755	0.914983	0.959195	ARMC1
3437.59	-0.053817	0.196083	-0.274461	0.78373	0.891549	ARMC10
74.0834	-0.566707	0.456365	-1.24179	0.214316	0.423375	ARMC12
141.552	-0.334282	0.314223	-1.06384	0.287403	0.508572	ARMC2
0	NA	NA	NA	NA	NA	ARMC3
2.53871	2.15261	1.90262	1.13139	0.25789	0.474865	ARMC4
2653.82	-0.743693	0.339489	-2.19062	0.0284791	0.0982236	ARMC5
4304.77	-0.236979	0.233041	-1.0169	0.309201	0.531838	ARMC6
963.68	-0.0787543	0.314327	-0.250549	0.802163	0.900832	ARMC7
1890.1	-0.0873095	0.18587	-0.469734	0.638545	0.809577	ARMC8
3189.94	-0.123813	0.245191	-0.504966	0.613583	0.794071	ARMC9
1.67445	-0.525957	2.00032	-0.262937	0.792599	0.895828	ARMCX1
1.48159	-3.4667	3.32522	-1.04255	0.297157	0.519214	ARMCX2
3786.83	-0.253549	0.352693	-0.718893	0.472207	0.687514	ARMCX3
113.508	0.492668	0.351487	1.40167	0.161015	0.353122	ARMCX4
830.254	0.343921	0.265973	1.29307	0.195988	0.400681	ARMCX5
1701.62	-0.70543	0.236363	-2.98452	0.00284024	0.0144722	ARMCX6
0.313592	-0.0552701	4.08047	-0.013545	0.989193	NA	ARMS2
1225.22	-0.413106	0.210622	-1.96136	0.049837	0.150568	ARMT1
4793.97	-0.420055	0.427927	-0.981605	0.326294	0.550219	ARNT
5015.8	-0.408748	0.315007	-1.29759	0.19443	0.398866	ARNT2
250.775	2.07778	0.360848	5.75805	8.50932e-09	1.23208e-07	ARNTL
512.437	2.32712	0.223468	10.4136	2.14827e-25	1.08798e-23	ARNTL2
11349.7	-0.248395	0.338084	-0.734713	0.462514	0.678779	ARPC1A
21094.5	-0.233159	0.216459	-1.07715	0.281412	0.502136	ARPC1B
19415.5	0.223081	0.242585	0.919596	0.357784	0.581599	ARPC2
17547.7	-0.128111	0.319751	-0.400658	0.688672	0.837871	ARPC3
11639.9	-0.287378	0.165019	-1.74148	0.081599	0.21755	ARPC4
289.497	-0.281975	0.346103	-0.814715	0.415235	0.637311	ARPC4-TTLL3
9420.62	0.268195	0.221993	1.20813	0.226999	0.438269	ARPC5
5917.78	-0.708116	0.336956	-2.10151	0.0355964	0.116318	ARPC5L
1364.71	0.327022	0.210963	1.55014	0.121109	0.288851	ARPIN
8441.25	0.091737	0.315109	0.291128	0.770954	0.884746	ARPP19
4.07245	3.11882	1.35058	2.30925	0.0209297	0.0765433	ARPP21
0	NA	NA	NA	NA	NA	ARR3
975.073	1.23337	0.245678	5.02026	5.16027e-07	5.82918e-06	ARRB1
2886.81	-0.728527	0.235681	-3.09116	0.00199378	0.0106852	ARRB2
1914.35	-0.224166	0.200405	-1.11856	0.263326	0.480774	ARRDC1
2149.21	-0.386105	0.279706	-1.3804	0.167464	0.362564	ARRDC2
2071.93	1.25076	0.316065	3.95729	7.5804e-05	0.000585557	ARRDC3
211.164	0.138902	0.267085	0.520069	0.603015	0.788173	ARRDC4
0	NA	NA	NA	NA	NA	ARRDC5
2000.99	1.07834	0.270213	3.99071	6.58752e-05	0.000516767	ARSA
1742.19	0.0431712	0.209346	0.20622	0.836619	0.919146	ARSB
1734.83	0.828853	0.180496	4.59208	4.38848e-06	4.24628e-05	ARSD
0.327256	1.80591	4.03841	0.447184	0.654742	NA	ARSE
0	NA	NA	NA	NA	NA	ARSF
679.976	-0.28676	0.268953	-1.06621	0.286329	0.507306	ARSG
0	NA	NA	NA	NA	NA	ARSH
105.972	3.57724	0.499565	7.16071	8.02608e-13	1.77597e-11	ARSI
76.7106	3.18609	0.427481	7.45318	9.11148e-14	2.18754e-12	ARSJ
432.725	0.250067	0.198335	1.26083	0.20737	0.415638	ARSK
0.191172	-1.01448	4.08047	-0.248619	0.803655	NA	ART1
0.364423	-0.0353636	4.08047	-0.00866654	0.993085	NA	ART3
2.29068	4.63061	1.98641	2.33115	0.0197454	0.0729485	ART4
26.7785	0.406421	0.649557	0.625688	0.531519	0.736235	ART5
45.6067	-0.909935	0.644098	-1.41273	0.157736	0.347922	ARTN
1264.02	-0.3795	0.188717	-2.01095	0.0443311	0.137661	ARV1
2563.16	0.874159	0.152967	5.7147	1.09901e-08	1.57452e-07	ARVCF
2.27686	-0.242988	1.78503	-0.136125	0.891722	0.947631	ARX
16.8131	-2.26525	1.26545	-1.79008	0.0734407	0.201496	AS3MT
4368.86	0.076482	0.174889	0.437317	0.661882	0.823374	ASAH1
37.114	0.939406	0.659544	1.42433	0.154352	0.342452	ASAH2
77.1277	0.777631	0.482413	1.61196	0.106971	0.264168	ASAH2B
6823.62	0.582984	0.462942	1.2593	0.207921	0.416243	ASAP1
1575.63	2.31469	0.435501	5.31499	1.06662e-07	1.32134e-06	ASAP2
2090.08	0.135107	0.177874	0.759564	0.447515	0.665928	ASAP3
3002.64	-0.479758	0.255091	-1.88073	0.0600081	0.173027	ASB1
0.190872	0.909069	4.08047	0.222785	0.823703	NA	ASB10
0	NA	NA	NA	NA	NA	ASB11
0	NA	NA	NA	NA	NA	ASB12
1397.99	-0.424195	0.369062	-1.14939	0.250397	0.466366	ASB13
10.0907	0.586621	0.665438	0.881556	0.378017	0.602414	ASB14
0.382344	-2.06117	4.02544	-0.512035	0.608626	NA	ASB15
72.5207	-0.14039	0.300213	-0.467634	0.640047	0.810492	ASB16
0	NA	NA	NA	NA	NA	ASB17
0.954775	-0.0626619	2.33622	-0.026822	0.978602	NA	ASB18
43.8112	4.14252	0.524805	7.89345	2.93951e-15	8.1359e-14	ASB2
1270.43	0.0829382	0.147255	0.563228	0.57328	0.767968	ASB3
2.73765	3.89718	1.90977	2.04066	0.0412848	0.13036	ASB4
1.70452	-0.668609	2.5607	-0.261104	0.794012	0.896529	ASB5
3693.75	-0.0996876	0.184279	-0.54096	0.588535	0.778911	ASB6
1520.41	-0.207418	0.303511	-0.683397	0.494356	0.70645	ASB7
1623.46	0.162907	0.197018	0.826864	0.408314	0.63074	ASB8
3.87023	2.53884	1.53419	1.65484	0.097957	0.248426	ASB9
1792.22	0.166619	0.170565	0.976866	0.328636	0.552713	ASCC1
4159.55	-0.0561398	0.275586	-0.20371	0.83858	0.919739	ASCC2
5515.24	0.281978	0.233548	1.20737	0.227291	0.438679	ASCC3
75.5122	-1.62704	0.432334	-3.76339	0.000167624	0.00119869	ASCL1
6.68091	-0.145648	0.829387	-0.175609	0.860601	0.929676	ASCL2
0.303861	1.71236	4.04705	0.423113	0.672213	NA	ASCL3
0	NA	NA	NA	NA	NA	ASCL4
5.75581	-0.242323	1.00233	-0.241759	0.808967	0.903897	ASCL5
1307.03	0.0678525	0.214049	0.316995	0.751247	0.872895	ASF1A
3709.61	-1.73305	0.238274	-7.27334	3.50707e-13	8.05997e-12	ASF1B
263.684	-2.41258	0.68894	-3.50188	0.000461988	0.00297666	ASGR1
1.00558	-0.461646	2.3951	-0.192746	0.847158	NA	ASGR2
5459.96	0.0769169	0.538313	0.142885	0.886381	0.945111	ASH1L
3274.54	0.00566505	0.135884	0.0416904	0.966746	0.983402	ASH2L
686.602	0.640651	0.219678	2.91632	0.00354189	0.0174188	ASIC1
8.67693	3.89344	1.08827	3.57765	0.000346702	0.00230701	ASIC2
121.798	-0.263284	0.436756	-0.602817	0.54663	0.749204	ASIC3
21.0595	-0.375789	0.667497	-0.562983	0.573446	0.768006	ASIC4
0	NA	NA	NA	NA	NA	ASIC5
5.8747	1.56481	1.00121	1.56292	0.118071	0.283431	ASIP
850.358	0.279073	0.317526	0.878897	0.379457	0.603812	ASL
0	NA	NA	NA	NA	NA	ASMT
3165.59	-1.09044	0.262293	-4.15732	3.22002e-05	0.00026695	ASMTL
9959.52	-0.0873822	0.20252	-0.431475	0.666123	0.825632	ASNA1
6602.38	-0.706873	0.362955	-1.94755	0.0514692	0.154241	ASNS
4519.69	-0.668664	0.290132	-2.30469	0.0211841	0.0772189	ASNSD1
1.4018	3.90716	3.02234	1.29276	0.196095	0.40085	ASPA
6.02973	-0.72717	0.893298	-0.814028	0.415629	0.637621	ASPDH
20.8065	0.149139	0.520872	0.286326	0.774629	0.886483	ASPG
4272	2.26574	0.235598	9.617	6.77793e-22	2.74778e-20	ASPH
3887.06	-0.480852	0.349871	-1.37437	0.169326	0.365219	ASPHD1
422.882	0.188396	0.203762	0.924586	0.355181	0.579233	ASPHD2
836.975	-1.1306	0.254369	-4.44474	8.79995e-06	8.1413e-05	ASPM
0.539701	2.51495	3.98779	0.630663	0.528261	NA	ASPN
72.5168	-0.521523	0.371488	-1.40388	0.160355	0.352224	ASPRV1
2313.51	-0.446477	0.383689	-1.16364	0.244569	0.458794	ASPSCR1
707.006	-0.572356	0.239664	-2.38816	0.0169329	0.0645769	ASRGL1
1122.71	2.09389	0.353143	5.92931	3.04218e-09	4.66318e-08	ASS1
389.039	0.1045	0.223671	0.467203	0.640355	0.810507	ASTE1
1.03878	3.46066	2.59546	1.33335	0.182417	NA	ASTL
1.05125	1.09898	2.8101	0.391081	0.695737	0.842146	ASTN1
3539.11	-0.42227	0.137132	-3.0793	0.0020749	0.0110736	ASTN2
2271.53	-0.433713	0.274337	-1.58095	0.113889	0.276138	ASUN
8004.33	-0.351641	0.221851	-1.58503	0.112959	0.274611	ASXL1
4470.72	-0.314155	0.60516	-0.519127	0.603673	0.788461	ASXL2
355.127	-0.900597	0.364455	-2.47108	0.0134706	0.0538307	ASXL3
2.71151	4.86377	1.8782	2.58959	0.0096091	0.0407293	ASZ1
2928.42	-0.0890808	0.183215	-0.48621	0.626818	0.802378	ATAD1
2556.12	-1.01192	0.41424	-2.44283	0.0145728	0.0573752	ATAD2
568.649	-0.523962	0.35603	-1.47168	0.141107	0.3222	ATAD2B
3592.02	-0.139898	0.247004	-0.566378	0.571137	0.76661	ATAD3A
2781.47	-0.33136	0.219338	-1.51073	0.130857	0.305626	ATAD3B
10.512	0.308666	0.880596	0.35052	0.725949	0.857737	ATAD3C
185.178	-0.711159	0.497704	-1.42888	0.153039	0.340446	ATAD5
1526.61	-0.346883	0.221517	-1.56595	0.117361	0.282094	ATAT1
5722.59	-0.913615	0.23275	-3.92531	8.6617e-05	0.000659001	ATCAY
3020.06	-0.311228	0.449214	-0.692828	0.488417	0.701311	ATE1
1836.29	-0.14217	0.417302	-0.340688	0.733339	0.862373	ATF1
2543.99	-0.145169	0.447015	-0.324751	0.745369	0.869678	ATF2
436.378	0.967744	0.302864	3.1953	0.00139684	0.00787352	ATF3
19126.9	-0.467338	0.307558	-1.51951	0.128634	0.301831	ATF4
11837.6	-0.600902	0.277675	-2.16405	0.0304606	0.103503	ATF5
3698.94	0.520083	0.205751	2.52773	0.0114803	0.0472426	ATF6
5125.81	0.226102	0.133809	1.68974	0.0910772	0.234912	ATF6B
3716.27	-0.257639	0.261706	-0.984459	0.32489	0.548575	ATF7
2859.3	-0.273706	0.461566	-0.592995	0.553184	0.754308	ATF7IP
830.289	-0.727838	0.290094	-2.50897	0.0121084	0.049452	ATF7IP2
1024.6	-0.679239	0.164945	-4.11797	3.82229e-05	0.000313266	ATG10
5898.6	-0.326514	0.299698	-1.08948	0.275944	0.495868	ATG101
2827.74	-0.0668146	0.16399	-0.407431	0.683692	0.83529	ATG12
9845.68	0.0639293	0.145813	0.438432	0.661073	0.823151	ATG13
4182.49	-0.900926	0.270234	-3.33388	0.000856442	0.00512021	ATG14
2417.21	0.104508	0.14836	0.704423	0.48117	0.694697	ATG16L1
917.146	-0.0929936	0.359221	-0.258876	0.795731	0.897557	ATG16L2
5004.28	-0.0802934	0.312409	-0.257014	0.797168	0.898214	ATG2A
2398.94	0.37675	0.507207	0.742794	0.457607	0.67421	ATG2B
2282.87	0.273964	0.193422	1.4164	0.156658	0.346093	ATG3
399.684	1.05812	0.292666	3.61546	0.000299819	0.00203073	ATG4A
4849.86	-0.187005	0.146181	-1.27927	0.200802	0.406849	ATG4B
421.809	-0.122007	0.3945	-0.30927	0.757116	0.87684	ATG4C
1142.59	-0.46858	0.36192	-1.29471	0.195421	0.399965	ATG4D
2152.78	-0.132582	0.151546	-0.87486	0.38165	0.606143	ATG5
3024.53	0.671025	0.170214	3.94224	8.07249e-05	0.000620691	ATG7
6314.68	0.206895	0.178453	1.15938	0.2463	0.461003	ATG9A
25.4534	1.82618	0.762656	2.3945	0.0166433	0.0637641	ATG9B
755.924	-0.258158	0.324039	-0.796687	0.425633	0.645732	ATHL1
11880.8	-0.586519	0.431855	-1.35814	0.17442	0.371777	ATIC
1121.75	-0.658168	0.194746	-3.37962	0.000725859	0.00443338	ATL1
1420.27	0.193392	0.405127	0.477361	0.633105	0.806113	ATL2
4367.81	0.26292	0.368211	0.714047	0.475198	0.689624	ATL3
4510.88	0.152585	0.527254	0.289395	0.772279	0.885263	ATM
5731.93	0.29385	0.139309	2.10934	0.0349157	0.114814	ATMIN
10090.1	-0.0474217	0.137257	-0.345494	0.729723	0.859936	ATN1
0.320827	-1.83954	4.04477	-0.454794	0.649258	NA	ATOH1
3.81036	-2.13804	1.4541	-1.47035	0.141468	0.322586	ATOH7
73.8266	4.28829	0.639979	6.70068	2.07456e-11	4.11504e-10	ATOH8
4519.14	-0.400018	0.464686	-0.860836	0.389328	0.612757	ATOX1
27.2109	0.796132	0.7026	1.13312	0.257163	0.473987	ATP10A
1.2979	-0.0368913	2.26733	-0.0162708	0.987018	0.994537	ATP10B
1823.42	1.82169	0.459583	3.96379	7.37685e-05	0.00057239	ATP10D
15159.6	-1.06579	0.69433	-1.53499	0.124787	0.295299	ATP11A
2208.33	0.0534071	0.466511	0.114482	0.908856	0.955968	ATP11B
1446.92	0.513291	0.239441	2.1437	0.0320568	0.107406	ATP11C
99.2954	-3.67853	0.347072	-10.5987	3.02019e-26	1.60774e-24	ATP12A
8980.74	-0.253122	0.166898	-1.51663	0.129361	0.302897	ATP13A1
6116.64	0.149374	0.342291	0.436395	0.66255	0.823628	ATP13A2
16791.2	1.86121	0.522017	3.56541	0.000363281	0.0024058	ATP13A3
0.905557	-0.76861	2.45155	-0.31352	0.753886	NA	ATP13A4
0.163628	0.909069	4.08047	0.222785	0.823703	NA	ATP13A5
31037.8	0.273503	0.141067	1.93881	0.0525243	0.156586	ATP1A1
169.549	9.7193	1.21171	8.02113	1.04776e-15	2.98424e-14	ATP1A2
1981.05	-0.646572	0.195423	-3.30857	0.000937737	0.00554653	ATP1A3
7.60008	1.87322	1.37724	1.36013	0.173788	0.371094	ATP1A4
3873.49	0.798816	0.162281	4.92244	8.54729e-07	9.28995e-06	ATP1B1
30.6273	-0.93885	0.581747	-1.61384	0.106561	0.263509	ATP1B2
6750.27	-0.0358992	0.398688	-0.0900434	0.928253	0.965293	ATP1B3
0.527963	-1.03194	3.30214	-0.312505	0.754656	NA	ATP1B4
233.623	-1.81069	0.35031	-5.16882	2.35576e-07	2.79172e-06	ATP2A1
20614.1	-0.0887095	0.356566	-0.248788	0.803525	0.901571	ATP2A2
1043.78	0.928788	0.207365	4.47899	7.49962e-06	7.00441e-05	ATP2A3
15604.4	2.0055	0.196741	10.1936	2.11789e-24	1.01113e-22	ATP2B1
9.74482	3.73637	1.16043	3.21981	0.00128276	0.00731711	ATP2B2
163.554	1.02533	0.30089	3.40766	0.000655226	0.00404947	ATP2B3
4556.09	2.29727	0.248941	9.22817	2.75302e-20	1.02619e-18	ATP2B4
5864.51	0.190309	0.157549	1.20794	0.22707	0.438355	ATP2C1
16.8391	-0.239095	0.685906	-0.348583	0.727402	0.858749	ATP2C2
4.9333	-0.964884	1.02832	-0.93831	0.348085	0.571747	ATP4A
0	NA	NA	NA	NA	NA	ATP4B
72173.9	-0.368316	0.139239	-2.64521	0.00816391	0.0355812	ATP5A1
78034.9	-0.422124	0.130316	-3.23924	0.00119848	0.00689302	ATP5B
17636.7	-0.80403	0.262359	-3.06461	0.0021795	0.0115524	ATP5C1
8765.51	-0.51182	0.281851	-1.81593	0.0693816	0.193026	ATP5D
17854.5	-0.203915	0.390402	-0.522321	0.601447	0.787866	ATP5E
207.904	-0.30941	0.375875	-0.823172	0.41041	0.632878	ATP5EP2
16463	-0.351836	0.124621	-2.82325	0.00475398	0.0223352	ATP5F1
7476.98	-0.446892	0.287006	-1.55708	0.119451	0.285879	ATP5G1
16633.7	-0.412372	0.376084	-1.09649	0.272864	0.492362	ATP5G2
18219.1	-0.50751	0.201581	-2.51765	0.011814	0.0483767	ATP5G3
13506.5	-0.547903	0.337234	-1.6247	0.104227	0.259391	ATP5H
9501.09	-0.739832	0.385404	-1.91963	0.054905	0.161945	ATP5I
14055.3	-0.817504	0.344883	-2.37038	0.0177698	0.0672005	ATP5J
13259.4	-0.608628	0.314609	-1.93455	0.053045	0.157663	ATP5J2
1132.24	0.22262	0.556334	0.400155	0.689042	0.837946	ATP5J2-PTCD1
15240.3	-0.575014	0.323234	-1.77894	0.075249	0.205003	ATP5L
131.422	-0.333887	0.397134	-0.840742	0.400492	0.624187	ATP5L2
17320.4	-0.478722	0.243301	-1.96761	0.0491125	0.148947	ATP5O
1047.78	-0.421961	0.257889	-1.63621	0.101795	0.254825	ATP5S
5103.58	-0.614645	0.191219	-3.21434	0.00130742	0.00743746	ATP5SL
7543.2	0.164471	0.164309	1.00099	0.316834	0.539673	ATP6AP1
257.759	-0.234558	0.22377	-1.04821	0.294541	0.516648	ATP6AP1L
8277.59	0.442239	0.280862	1.57458	0.115354	0.278513	ATP6AP2
7078.08	-0.352933	0.167532	-2.10666	0.0351468	0.115256	ATP6V0A1
1836.24	-0.156228	0.473215	-0.330142	0.741293	0.866888	ATP6V0A2
18.2851	5.66441	1.25486	4.51399	6.36201e-06	6.03323e-05	ATP6V0A4
8711.8	-0.404519	0.301544	-1.34149	0.179761	0.379647	ATP6V0B
18172.6	-0.580847	0.30692	-1.89251	0.0584237	0.169513	ATP6V0C
10898.4	-0.190885	0.230159	-0.829361	0.4069	0.62963	ATP6V0D1
7.41551	5.3004	1.60797	3.29634	0.00097953	0.00575897	ATP6V0D2
11400.2	0.126081	0.38364	0.328646	0.742424	0.867784	ATP6V0E1
3354.15	-0.328862	0.184563	-1.78185	0.0747744	0.204245	ATP6V0E2
5684.01	-0.194565	0.421761	-0.461315	0.644572	0.813195	ATP6V1A
61.2252	-0.821146	0.461422	-1.7796	0.0751417	0.204811	ATP6V1B1
7791.3	0.0362442	0.132784	0.272957	0.784886	0.892014	ATP6V1B2
7392.74	-0.0510644	0.388738	-0.13136	0.895491	0.948918	ATP6V1C1
163.309	0.0935792	0.351267	0.266405	0.789928	0.894251	ATP6V1C2
5303.77	0.000193946	0.249862	0.000776211	0.999381	0.999621	ATP6V1D
12974.5	-0.300194	0.241469	-1.2432	0.213794	0.422952	ATP6V1E1
1200.78	-1.00618	0.192936	-5.21509	1.83727e-07	2.2151e-06	ATP6V1E2
10548.4	-0.206618	0.378985	-0.545187	0.585625	0.776744	ATP6V1F
8358.08	-0.178947	0.216343	-0.827146	0.408154	0.630625	ATP6V1G1
87.3954	-0.203051	0.321838	-0.63091	0.5281	0.733205	ATP6V1G2
0	NA	NA	NA	NA	NA	ATP6V1G2-DDX39B
0	NA	NA	NA	NA	NA	ATP6V1G3
5919.44	-1.0206	0.394559	-2.58669	0.00969017	0.0409999	ATP6V1H
1027.31	0.0190751	0.553511	0.034462	0.972509	0.986121	ATP7A
1088.23	0.145846	0.325893	0.447527	0.654495	0.819077	ATP7B
120.687	1.68963	0.715108	2.36276	0.0181394	0.0683643	ATP8A1
20.7959	1.74057	0.561106	3.10203	0.00192199	0.0103739	ATP8A2
404.086	4.6831	0.61951	7.55936	4.05072e-14	1.01493e-12	ATP8B1
9570.99	1.04121	0.214844	4.84637	1.25742e-06	1.33277e-05	ATP8B2
548.565	-0.181182	0.330195	-0.548714	0.583202	0.774658	ATP8B3
5.59488	2.1734	1.29122	1.68321	0.0923345	0.237393	ATP8B4
7457.51	0.322191	0.303542	1.06144	0.28849	0.509683	ATP9A
1077.54	0.314961	0.261589	1.20403	0.228578	0.440195	ATP9B
4256.06	0.238534	0.194283	1.22777	0.219535	0.429704	ATPAF1
1395.94	-0.187529	0.206367	-0.908716	0.3635	0.587852	ATPAF2
5169.75	-0.401984	0.349175	-1.15124	0.249633	0.465308	ATPIF1
2557.17	-0.101307	0.18509	-0.54734	0.584145	0.77554	ATR
6048.31	-0.125083	0.222588	-0.56195	0.57415	0.768578	ATRAID
890.894	-0.0377464	0.205618	-0.183575	0.854347	0.926886	ATRIP
4706.72	0.206731	0.378487	0.546203	0.584927	0.776083	ATRN
0.744253	-0.418105	3.08018	-0.135741	0.892026	NA	ATRNL1
4548.87	0.197764	0.54515	0.362771	0.716776	0.854117	ATRX
20.6185	1.77907	0.587271	3.02939	0.00245049	0.0127355	ATXN1
14481.4	-0.0866247	0.375766	-0.230528	0.817681	0.909432	ATXN10
4499.94	0.0523058	0.325535	0.160676	0.872348	0.936216	ATXN1L
3964.14	-0.624999	0.143616	-4.35187	1.3498e-05	0.000120851	ATXN2
13365.3	-0.531575	0.224939	-2.36319	0.0181182	0.0682998	ATXN2L
1915.78	-0.414185	0.153027	-2.70661	0.00679744	0.0304051	ATXN3
0.191172	-1.01448	4.08047	-0.248619	0.803655	NA	ATXN3L
2449.02	-0.841994	0.56616	-1.4872	0.136962	0.315957	ATXN7
715.092	0.0155018	0.273754	0.0566268	0.954843	0.978693	ATXN7L1
995.277	-0.945907	0.379088	-2.49522	0.0125879	0.0510192	ATXN7L2
6359.27	-0.0583892	0.201694	-0.289494	0.772203	0.885263	ATXN7L3
10580	-0.202875	0.146312	-1.38659	0.165567	0.359631	ATXN7L3B
739.568	-0.191583	0.182192	-1.05154	0.293009	0.514883	AUH
249.936	-0.621703	0.195599	-3.17845	0.00148063	0.0082703	AUNIP
10890.6	-0.417102	0.302992	-1.37661	0.168633	0.364194	AUP1
1798.54	-0.919585	0.239912	-3.833	0.000126587	0.000930803	AURKA
10456	-0.441965	0.355867	-1.24194	0.214259	0.423375	AURKAIP1
868.21	-1.57895	0.24682	-6.39717	1.58282e-10	2.83276e-09	AURKB
18.1276	-0.905036	0.814905	-1.1106	0.266739	0.484668	AURKC
65.043	1.53624	0.474016	3.24092	0.00119146	0.0068574	AUTS2
1061.89	0.0332218	0.370476	0.0896733	0.928547	0.965397	AVEN
93.3727	0.0831878	0.32788	0.253714	0.799716	0.899236	AVIL
5317.55	-0.376911	0.300047	-1.25617	0.209053	0.417655	AVL9
0.147719	-1.01448	4.08047	-0.248619	0.803655	NA	AVP
669.19	-0.103465	0.257299	-0.402119	0.687597	0.837419	AVPI1
0.295437	-1.7381	4.05464	-0.428668	0.668165	NA	AVPR1A
0	NA	NA	NA	NA	NA	AVPR1B
5.60798	-1.0061	0.913586	-1.10126	0.270783	0.489454	AVPR2
0.680801	2.8531	2.95278	0.966241	0.333924	NA	AWAT1
5.20919	5.79779	1.5632	3.70892	0.000208142	0.00145717	AWAT2
3.90348	0.145178	1.11813	0.12984	0.896693	0.949681	AXDND1
3431.46	-0.334693	0.170652	-1.96126	0.049849	0.150577	AXIN1
753.325	0.543383	0.183876	2.95516	0.00312506	0.0156849	AXIN2
3288.58	2.23069	0.310088	7.19374	6.30425e-13	1.41375e-11	AXL
5.02541	2.71332	1.21448	2.23415	0.0254734	0.0900951	AZGP1
4161.41	-0.563582	0.247498	-2.27712	0.0227792	0.0819934	AZI2
6738.16	0.0913035	0.30143	0.302901	0.761965	0.879384	AZIN1
386.252	2.01067	0.250641	8.02213	1.03924e-15	2.96504e-14	AZIN2
40.2804	-1.61852	0.836191	-1.93559	0.0529184	0.157492	AZU1
26189	0.814499	0.31499	2.58579	0.00971553	0.0410968	B2M
1.03826	-2.25053	2.84796	-0.790225	0.429396	NA	B3GALNT1
1955.68	0.188328	0.489172	0.384993	0.700242	0.845216	B3GALNT2
29.7198	-0.592192	0.614199	-0.964169	0.334961	0.559847	B3GALT1
7.32402	2.05147	1.1849	1.73134	0.0833911	0.220655	B3GALT2
128.529	-0.799015	0.256859	-3.11071	0.00186637	0.0101097	B3GALT4
0.529892	-2.5466	3.99192	-0.637939	0.523513	NA	B3GALT5
3927.41	-0.218692	0.204386	-1.06999	0.284623	0.505747	B3GALT6
20.5988	2.16257	0.594876	3.63533	0.000277622	0.00189813	B3GAT1
72.6997	-0.537575	0.332415	-1.61718	0.105839	0.262229	B3GAT2
4654.16	0.32555	0.292668	1.11235	0.265986	0.484039	B3GAT3
322.996	1.15057	0.335909	3.42525	0.000614225	0.00382731	B3GLCT
1458.54	1.85983	0.24003	7.74831	9.31221e-15	2.45895e-13	B3GNT2
0.918186	-1.76273	2.85176	-0.618117	0.536498	NA	B3GNT3
212.316	-0.706542	0.408543	-1.72942	0.0837346	0.221247	B3GNT4
78.9515	4.0158	0.434563	9.24099	2.44217e-20	9.14415e-19	B3GNT5
1.0196	0.238296	2.43565	0.0978368	0.922062	NA	B3GNT6
21.2077	2.00355	0.682518	2.93552	0.00332989	0.016559	B3GNT7
50.4886	5.44717	0.647472	8.41297	3.9975e-17	1.24731e-15	B3GNT8
2177.37	0.426885	0.184967	2.3079	0.0210045	0.0767912	B3GNT9
783.54	-1.07977	0.254634	-4.24048	2.23039e-05	0.00019097	B3GNTL1
4021.17	-0.963974	0.243374	-3.96087	7.46783e-05	0.000578363	B4GALNT1
4.20102	1.27661	1.54276	0.827484	0.407963	0.630447	B4GALNT2
333.176	2.68513	0.416891	6.44083	1.18825e-10	2.16378e-09	B4GALNT3
2275.22	-0.271711	0.312353	-0.869884	0.384364	0.608366	B4GALNT4
5834.5	1.34795	0.242767	5.55246	2.81672e-08	3.81604e-07	B4GALT1
4402.33	-0.0211596	0.239671	-0.088286	0.929649	0.965646	B4GALT2
2884.87	-0.390114	0.153918	-2.53456	0.011259	0.0464924	B4GALT3
1116.81	-0.032475	0.316126	-0.102728	0.918179	0.960628	B4GALT4
5976.57	0.609666	0.200035	3.04779	0.00230532	0.0121057	B4GALT5
1495.18	1.73759	0.472939	3.67402	0.000238765	0.00165255	B4GALT6
2066.82	0.409415	0.282663	1.44842	0.1475	0.331801	B4GALT7
3559.01	0.0504979	0.162087	0.311548	0.755384	0.875558	B4GAT1
1408.35	-0.468878	0.338508	-1.38513	0.166012	0.360276	B9D1
741.376	-0.346193	0.351321	-0.985403	0.324426	0.548068	B9D2
18.7022	3.42233	0.798931	4.28363	1.83867e-05	0.000159562	BAALC
10.5586	-0.605546	0.762385	-0.794279	0.427033	0.646971	BAAT
8556.75	-0.0671284	0.290517	-0.231065	0.817264	0.90915	BABAM1
3212.48	0.836915	0.251459	3.32823	0.000873982	0.00521759	BACE1
142.875	2.24443	0.322726	6.9546	3.53556e-12	7.52356e-11	BACE2
1721.82	0.770931	0.419681	1.83695	0.0662176	0.186308	BACH1
19.064	3.57261	0.836109	4.2729	1.92944e-05	0.000166486	BACH2
2027.57	-0.128204	0.298399	-0.42964	0.667457	0.826239	BAD
7051.05	-0.0742733	0.263476	-0.281898	0.778022	0.888406	BAG1
1862.52	0.378518	0.184416	2.05252	0.0401194	0.12726	BAG2
9811.19	0.054981	0.269517	0.203998	0.838355	0.919705	BAG3
1906.48	0.0558613	0.333758	0.16737	0.867079	0.933168	BAG4
3732.56	0.0416104	0.27789	0.149737	0.880972	0.941977	BAG5
22036.2	-0.532797	0.298903	-1.78251	0.0746665	0.203983	BAG6
0	NA	NA	NA	NA	NA	BAGE5
2132.96	-0.127596	0.303051	-0.421037	0.673728	0.829884	BAHCC1
4025.52	-0.305079	0.210872	-1.44675	0.147967	0.332223	BAHD1
4505.97	0.0866802	0.188216	0.460537	0.645131	0.813673	BAIAP2
2801.86	-0.58856	0.19256	-3.05651	0.00223933	0.011815	BAIAP2L1
24.9247	-1.36701	0.628583	-2.17475	0.0296488	0.101397	BAIAP2L2
304.332	0.298314	0.219793	1.35725	0.174703	0.372333	BAIAP3
3295.25	0.706078	0.224325	3.14756	0.00164638	0.00907442	BAK1
40.0594	3.35002	0.579804	5.77786	7.56556e-09	1.1019e-07	BAMBI
12554	-0.525366	0.399902	-1.31374	0.188935	0.391692	BANF1
0	NA	NA	NA	NA	NA	BANF2
54.0789	0.97365	0.550513	1.76862	0.0769568	0.208327	BANK1
1040.42	-0.787189	0.366385	-2.14853	0.0316715	0.106479	BANP
9605.04	-0.110008	0.197173	-0.557925	0.576896	0.770767	BAP1
271.287	-0.465101	0.558888	-0.832189	0.405302	0.628668	BARD1
1.31196	1.23047	2.67247	0.460424	0.645212	0.813673	BARHL1
0.635353	2.76596	2.98799	0.925692	0.354606	NA	BARHL2
5791.98	-0.411746	0.329279	-1.25045	0.211135	0.420052	BARX1
52.098	2.70349	0.629627	4.2938	1.75639e-05	0.000153059	BARX2
89.386	-0.595317	0.361439	-1.64707	0.099543	0.251301	BASP1
0.14033	0.909069	4.08047	0.222785	0.823703	NA	BATF
100.013	2.97806	0.457013	6.51635	7.2037e-11	1.34863e-09	BATF2
37.8345	1.11884	0.591035	1.89303	0.0583545	0.169391	BATF3
19122.2	-0.370217	0.372831	-0.992989	0.320715	0.544116	BAX
3834.53	-0.0915899	0.222987	-0.41074	0.681263	0.833911	BAZ1A
7574.17	0.151394	0.305539	0.495499	0.620248	0.798275	BAZ1B
6459.74	-0.109884	0.474955	-0.231358	0.817037	0.909141	BAZ2A
1763.6	0.54098	0.474061	1.14116	0.253802	0.470142	BAZ2B
3644.25	-0.541166	0.269893	-2.00511	0.044951	0.138879	BBC3
742.883	-0.394117	0.217417	-1.81273	0.0698739	0.193975	BBIP1
269.425	-0.0289188	0.317617	-0.0910491	0.927454	0.965163	BBOF1
3.44902	5.17197	1.96474	2.63239	0.00847872	0.0367993	BBOX1
2050.28	0.021746	0.227953	0.0953969	0.924	0.963432	BBS1
1455.29	-0.0049662	0.356214	-0.0139416	0.988877	0.994938	BBS10
601.512	0.320696	0.187885	1.70687	0.0878458	0.229167	BBS12
2482.66	0.560805	0.164171	3.41597	0.000635543	0.00394098	BBS2
2149.56	-0.473119	0.192954	-2.45198	0.0142073	0.0562819	BBS4
712.585	-0.342346	0.17916	-1.91084	0.0560255	0.164311	BBS5
792.942	0.0643704	0.15324	0.420062	0.67444	0.830272	BBS7
863.097	-0.589788	0.195862	-3.01124	0.00260183	0.0133926	BBS9
10206.6	-0.481581	0.559454	-0.860806	0.389345	0.612757	BBX
200.042	2.47961	0.272508	9.09922	9.09865e-20	3.28854e-18	BCAM
23.7398	-0.0458365	0.581696	-0.078798	0.937193	0.969613	BCAN
2294.93	0.170744	0.195097	0.875172	0.38148	0.606105	BCAP29
28326.3	0.0206859	0.271905	0.0760779	0.939357	0.970941	BCAP31
5258.68	0.662789	0.164646	4.02555	5.68432e-05	0.000451225	BCAR1
1807.54	4.02985	0.305201	13.2039	8.32567e-40	8.72467e-38	BCAR3
11.6451	-0.732774	0.742398	-0.987037	0.323625	0.547247	BCAS1
2721.54	0.159712	0.259685	0.615023	0.53854	0.742933	BCAS2
3968.57	-0.476952	0.161022	-2.96203	0.0030562	0.0153798	BCAS3
3292.65	-1.31157	0.222744	-5.88825	3.90313e-09	5.8642e-08	BCAS4
18.9735	2.68825	0.982013	2.73749	0.00619098	0.0280757	BCAT1
2470.76	-0.27586	0.286912	-0.961478	0.336312	0.561145	BCAT2
8328.95	-0.538969	0.295795	-1.8221	0.0684394	0.191107	BCCIP
778.515	-0.437377	0.216781	-2.01759	0.0436335	0.136087	BCDIN3D
14.4525	-0.313794	0.635914	-0.493453	0.621692	0.798846	BCHE
1893.31	-0.0840353	0.286037	-0.293792	0.768917	0.883662	BCKDHA
741.74	0.810798	0.386297	2.0989	0.0358258	0.116839	BCKDHB
5570.21	0.0110646	0.187779	0.0589233	0.953013	0.97773	BCKDK
1227.87	0.754691	0.185338	4.07197	4.66178e-05	0.000376148	BCL10
4.95592	0.166767	0.932584	0.178823	0.858077	0.928504	BCL11A
5.56556	2.56064	1.18881	2.15395	0.0312445	0.105512	BCL11B
4.67106	1.07079	1.06079	1.00942	0.312773	0.535755	BCL2
3456.04	-0.208255	0.266649	-0.781007	0.434798	0.654554	BCL2A1
7643.5	1.19076	0.194769	6.11371	9.73384e-10	1.58539e-08	BCL2L1
1.76098	-1.97371	1.9302	-1.02254	0.306527	0.529149	BCL2L10
2288.6	0.92886	0.221737	4.18901	2.80172e-05	0.000235294	BCL2L11
1807.31	-0.601955	0.320815	-1.87633	0.0606099	0.174358	BCL2L12
5434.91	0.239501	0.185591	1.29048	0.196885	0.401677	BCL2L13
1.36354	3.81853	2.46059	1.55188	0.120692	0.288186	BCL2L14
7.82204	-2.15862	1.33108	-1.6217	0.104867	0.260488	BCL2L15
1812.4	-0.330559	0.194756	-1.6973	0.08964	0.232283	BCL2L2
1192	-0.582106	0.182575	-3.18831	0.00143107	0.00803116	BCL2L2-PABPN1
1239.07	0.768903	0.378693	2.03041	0.0423146	0.132887	BCL3
925.933	4.96355	0.280382	17.7028	3.99085e-70	1.44556e-67	BCL6
0.280661	1.61474	4.05669	0.398045	0.690597	NA	BCL6B
2367.59	-0.782644	0.31817	-2.45983	0.0139004	0.0552631	BCL7A
2542.93	-0.285678	0.31843	-0.897145	0.369642	0.594267	BCL7B
4621.32	-0.364837	0.257893	-1.41468	0.157162	0.346885	BCL7C
3674.72	0.317951	0.424046	0.749802	0.453374	0.670821	BCL9
9812.32	-0.149623	0.481443	-0.31078	0.755968	0.875873	BCL9L
10332.1	0.0600041	0.346676	0.173084	0.862585	0.930897	BCLAF1
1.78406	4.24949	2.13774	1.98784	0.0468289	0.143325	BCO1
205.966	3.60562	0.477535	7.55048	4.33667e-14	1.0817e-12	BCO2
4438.23	-0.257951	0.241234	-1.0693	0.284936	0.505995	BCOR
3171.17	0.269228	0.351097	0.766822	0.443188	0.662218	BCORL1
8545.37	0.29305	0.139438	2.10166	0.0355833	0.116298	BCR
1243.1	-0.185776	0.267776	-0.693776	0.487823	0.700826	BCS1L
14.4006	2.19844	0.672803	3.26758	0.0010847	0.00630607	BDH1
983.126	0.591105	0.207701	2.84594	0.00442799	0.0210918	BDH2
749.376	8.76927	0.743363	11.7968	4.0565e-32	2.95151e-30	BDKRB1
938.376	9.23684	0.59803	15.4454	8.09768e-54	1.56888e-51	BDKRB2
246.399	4.13954	0.337642	12.2601	1.48228e-34	1.18739e-32	BDNF
1929.11	-0.27432	0.412754	-0.66461	0.5063	0.716167	BDP1
62.8717	3.52668	0.465905	7.56952	3.74615e-14	9.45733e-13	BEAN1
7788.76	-0.0510495	0.143043	-0.356883	0.721179	0.855625	BECN1
14.953	0.0334822	0.668768	0.0500655	0.96007	0.980929	BECN2
908.81	0.388948	0.288835	1.34661	0.178106	0.377449	BEGAIN
0.14033	0.909069	4.08047	0.222785	0.823703	NA	BEND2
1048.91	-0.359133	0.205499	-1.74762	0.0805307	0.215412	BEND3
21.8011	0.159108	0.527832	0.301436	0.763082	0.879965	BEND4
1.6009	2.04103	2.23026	0.915156	0.36011	0.584217	BEND5
354.468	3.50827	0.295898	11.8563	1.99497e-32	1.47734e-30	BEND6
46.5488	1.08455	0.488795	2.21882	0.026499	0.0927146	BEND7
2817.85	1.23399	0.481112	2.56486	0.0103217	0.043298	BEST1
6.26687	0.191311	1.04851	0.18246	0.855221	0.927058	BEST2
13.8595	7.20054	1.36045	5.29275	1.2049e-07	1.47944e-06	BEST3
2.46998	0.435794	1.60644	0.27128	0.786176	0.89226	BEST4
714.721	0.60721	0.208783	2.90834	0.00363355	0.0177908	BET1
6037.8	0.00328507	0.170124	0.0193098	0.984594	0.993177	BET1L
408.17	6.79104	0.595061	11.4124	3.62774e-30	2.40818e-28	BEX1
10.9857	-0.496925	0.653512	-0.760392	0.44702	0.665646	BEX2
0	NA	NA	NA	NA	NA	BEX4
0	NA	NA	NA	NA	NA	BEX5
5546.31	-0.0404081	0.157454	-0.256635	0.797461	0.898282	BFAR
82.1115	2.10992	0.453662	4.65087	3.30533e-06	3.2704e-05	BFSP1
0.606175	0.466572	3.17725	0.146848	0.883252	NA	BFSP2
30.5454	3.16052	0.756219	4.17937	2.92315e-05	0.000244874	BGLAP
13.085	1.44491	0.9766	1.47953	0.138998	0.319216	BGN
38.2055	-0.5351	0.751753	-0.711803	0.476587	0.690873	BHLHA15
3.03915	-1.83474	1.2665	-1.44866	0.147431	0.33169	BHLHA9
719.053	0.437964	0.29466	1.48634	0.13719	0.316339	BHLHB9
152.262	-0.550721	0.543159	-1.01392	0.31062	0.533466	BHLHE22
1.47299	-0.260463	1.863	-0.139808	0.888812	0.946419	BHLHE23
9414.51	0.380476	0.189411	2.00874	0.0445651	0.138096	BHLHE40
13.2725	1.67678	0.780037	2.14961	0.0315859	0.106256	BHLHE41
1.84516	-0.0941982	1.69913	-0.0554392	0.955789	0.978732	BHMG1
0	NA	NA	NA	NA	NA	BHMT
0	NA	NA	NA	NA	NA	BHMT2
3.85858	1.12775	1.19234	0.945829	0.344236	0.567662	BICC1
1332.04	0.672892	0.183746	3.66207	0.000250185	0.00172255	BICD1
4496.52	0.145712	0.268728	0.54223	0.58766	0.777975	BICD2
4635.28	-0.013974	0.248495	-0.0562345	0.955155	0.978732	BID
69.3192	-0.249519	0.552891	-0.4513	0.651774	0.817467	BIK
1335.87	0.967289	0.315831	3.06268	0.00219365	0.0116144	BIN1
4.34697	1.46738	1.27879	1.14747	0.251187	0.467324	BIN2
2043.07	0.504001	0.189879	2.65433	0.00794669	0.034771	BIN3
3642.58	0.11249	0.172952	0.650411	0.515427	0.722512	BIRC2
13.8114	0.554633	0.778984	0.711995	0.476468	0.690873	BIRC3
2942.86	-1.4541	0.225564	-6.44653	1.14442e-10	2.09082e-09	BIRC5
5947.31	0.217473	0.268615	0.80961	0.418165	0.639344	BIRC6
9.44881	0.911734	0.899432	1.01368	0.310737	0.533598	BIRC7
0	NA	NA	NA	NA	NA	BIRC8
1669.06	0.153268	0.276074	0.555172	0.578777	0.771786	BIVM
733.033	0.736287	2.00711	0.36684	0.713738	0.852984	BIVM-ERCC5
0	NA	NA	NA	NA	NA	BLACE
6830.51	0.156929	0.236707	0.662968	0.507351	0.716701	BLCAP
1.11501	-1.49513	2.20629	-0.677666	0.497983	0.709616	BLID
1.26876	3.73277	2.41142	1.54796	0.121633	0.289918	BLK
486.052	-1.41444	0.310505	-4.55531	5.23092e-06	5.02929e-05	BLM
3578.81	0.230372	0.197478	1.16657	0.243385	0.457762	BLMH
79.8992	9.73667	1.25554	7.75494	8.83852e-15	2.33758e-13	BLNK
2320.22	-0.165685	0.321451	-0.515428	0.606254	0.790178	BLOC1S1
8089.5	-0.135696	0.289427	-0.468845	0.639181	0.810011	BLOC1S2
2123.98	-0.28722	0.163143	-1.76054	0.078316	0.210876	BLOC1S3
3186.92	-0.193663	0.25819	-0.750078	0.453208	0.670754	BLOC1S4
747.263	-0.0329459	0.265219	-0.124222	0.90114	0.952215	BLOC1S5
74.335	5.54548	1.74353	3.1806	0.00146969	0.00822572	BLOC1S5-TXNDC5
3328.49	-0.0932974	0.257756	-0.36196	0.717382	0.854275	BLOC1S6
2550.29	0.775178	0.430824	1.79929	0.0719729	0.198545	BLVRA
6594.08	-0.888603	0.356752	-2.49081	0.0127452	0.0515436	BLVRB
1483.72	0.100852	0.299475	0.336762	0.736296	0.863426	BLZF1
356.302	0.0657518	0.460452	0.142798	0.886449	0.945111	BMF
1943.65	-0.426226	0.29447	-1.44744	0.147775	0.331971	BMI1
4113.73	1.99933	0.2425	8.24463	1.65674e-16	4.98277e-15	BMP1
0	NA	NA	NA	NA	NA	BMP10
0.191172	-1.01448	4.08047	-0.248619	0.803655	NA	BMP15
208.649	1.72694	0.218563	7.90134	2.75912e-15	7.67486e-14	BMP2
1806.81	0.402659	0.26688	1.50877	0.131358	0.306317	BMP2K
5.23542	1.95189	1.28283	1.52155	0.128121	0.300882	BMP3
3.47985	-1.20905	1.2769	-0.946864	0.343708	0.567184	BMP4
1016.43	0.0555523	0.194947	0.284962	0.775673	0.886986	BMP5
201.377	6.27779	0.835825	7.51089	5.8728e-14	1.4369e-12	BMP6
24.3391	0.910786	0.556164	1.63762	0.1015	0.25452	BMP7
81.6508	-0.114685	0.448958	-0.255447	0.798378	0.898701	BMP8A
515.73	0.112332	0.174446	0.643935	0.519617	0.726026	BMP8B
44.2676	2.66233	0.555207	4.79521	1.62504e-06	1.69227e-05	BMPER
4600.94	-0.311588	0.446099	-0.698473	0.484881	0.697857	BMPR1A
10.8896	-1.1996	1.03411	-1.16003	0.246035	0.460767	BMPR1B
5256.72	0.26869	0.265771	1.01098	0.312024	0.534926	BMPR2
6757.34	-0.221373	0.12698	-1.74337	0.0812685	0.216829	BMS1
0.163628	0.909069	4.08047	0.222785	0.823703	NA	BMX
4565.05	-0.829127	0.395459	-2.09662	0.0360271	0.117312	BNC1
8.75931	3.33606	1.37835	2.42032	0.0155067	0.0602548	BNC2
937.649	-0.320049	0.334067	-0.958037	0.338044	0.562586	BNIP1
2736.04	0.307839	0.384835	0.799926	0.423754	0.64398	BNIP2
3854.66	0.0927339	0.22374	0.414473	0.678528	0.832218	BNIP3
3957.05	0.315936	0.268625	1.17612	0.239546	0.453817	BNIP3L
34.6607	-2.83592	0.522281	-5.42987	5.63962e-08	7.28429e-07	BNIPL
5.89241	4.14674	1.47636	2.80876	0.00497331	0.0232181	BOC
5507.33	-0.281095	0.229609	-1.22424	0.220863	0.431418	BOD1
5936.14	0.00922538	0.165402	0.0557755	0.955521	0.978732	BOD1L1
1.13887	-1.52647	2.25953	-0.675571	0.499313	0.71012	BOD1L2
3564.84	0.155638	0.228046	0.682487	0.494931	0.706766	BOK
886.744	-0.897886	0.261642	-3.43174	0.000599723	0.00374254	BOLA1
2519.85	-0.609427	0.397201	-1.5343	0.124955	0.295612	BOLA2
4379.9	-0.787896	0.46272	-1.70275	0.0886149	0.230631	BOLA2B
1509.85	-0.245536	0.251221	-0.977373	0.328385	0.552514	BOLA3
0.173173	-1.01448	4.08047	-0.248619	0.803655	NA	BOLL
6490.01	-0.157572	0.334839	-0.470589	0.637934	0.80936	BOP1
376.382	-0.795223	0.29571	-2.6892	0.00716226	0.0318039	BORA
1067.44	-0.0911203	0.248828	-0.366197	0.714218	0.85319	BORCS5
1718.61	-1.1641	0.263339	-4.42053	9.84588e-06	9.01268e-05	BORCS6
1500.24	0.166913	0.206088	0.809915	0.417989	0.639274	BORCS7
12.4038	0.473312	1.74811	0.270757	0.786578	0.89228	BORCS7-ASMT
1580.8	-0.678497	0.286911	-2.36483	0.0180382	0.0680341	BORCS8
591.346	-0.349854	0.224728	-1.55679	0.11952	0.285962	BORCS8-MEF2B
701.729	-0.141844	0.249143	-0.569326	0.569135	0.765175	BPGM
1085.88	0.119357	0.159733	0.747225	0.454928	0.672071	BPHL
0.190872	0.909069	4.08047	0.222785	0.823703	NA	BPI
0	NA	NA	NA	NA	NA	BPIFA1
0.190872	0.909069	4.08047	0.222785	0.823703	NA	BPIFA2
0	NA	NA	NA	NA	NA	BPIFA3
0.147719	-1.01448	4.08047	-0.248619	0.803655	NA	BPIFB1
0.163628	0.909069	4.08047	0.222785	0.823703	NA	BPIFB2
0.147719	-1.01448	4.08047	-0.248619	0.803655	NA	BPIFB3
8.48888	6.48274	1.56184	4.1507	3.31455e-05	0.000274352	BPIFB4
0	NA	NA	NA	NA	NA	BPIFB6
28.0242	8.22365	1.27715	6.43908	1.20198e-10	2.18639e-09	BPIFC
1294.52	0.302028	0.18993	1.59021	0.111787	0.272589	BPNT1
6482.32	-0.105504	0.2632	-0.400852	0.688529	0.83782	BPTF
0	NA	NA	NA	NA	NA	BPY2
0	NA	NA	NA	NA	NA	BPY2B
0	NA	NA	NA	NA	NA	BPY2C
1656.92	-0.178616	0.33606	-0.5315	0.595072	0.783307	BRAF
2646.54	-0.0902355	0.168025	-0.537036	0.591243	0.780781	BRAP
6792.37	-0.546657	0.184001	-2.97094	0.00296888	0.0150129	BRAT1
1056.75	-0.972368	0.45787	-2.12368	0.0336971	0.111645	BRCA1
315.105	-1.02822	0.433027	-2.37449	0.0175733	0.0665773	BRCA2
2042.63	-0.613309	0.234967	-2.61019	0.00904917	0.0387303	BRCC3
2786.44	-0.408178	0.160863	-2.53743	0.011167	0.0461815	BRD1
26734.9	-0.537304	0.21925	-2.45065	0.0142599	0.0564265	BRD2
5027.89	-0.162234	0.41559	-0.390369	0.696263	0.842318	BRD3
10127.3	-0.24356	0.292206	-0.833522	0.40455	0.627969	BRD4
5115.43	-0.204183	0.256831	-0.795009	0.426608	0.646556	BRD7
6203.05	-0.325917	0.181911	-1.79163	0.0731926	0.201111	BRD8
4667.36	-0.165182	0.213948	-0.772066	0.440075	0.658867	BRD9
0	NA	NA	NA	NA	NA	BRDT
2371.74	0.450313	0.251363	1.79148	0.0732157	0.201141	BRE
4795.02	-0.46951	0.145685	-3.22278	0.00126952	0.00724903	BRF1
1400.48	-0.151641	0.288475	-0.525664	0.599122	0.786091	BRF2
5742.01	0.153758	0.368062	0.417752	0.676129	0.830923	BRI3
6774.36	-1.64258	0.38127	-4.30818	1.64605e-05	0.000144731	BRI3BP
86.6034	-1.36101	0.52385	-2.59808	0.0093746	0.0398468	BRICD5
210.343	3.57044	0.339332	10.522	6.84304e-26	3.56309e-24	BRINP1
0.471632	2.33556	3.99847	0.584114	0.559143	NA	BRINP2
1654.2	-0.255476	0.279776	-0.913147	0.361165	0.585224	BRINP3
298.745	-1.17422	0.452037	-2.59763	0.00938692	0.0398687	BRIP1
3200.27	-0.425105	0.290849	-1.4616	0.143851	0.326593	BRIX1
10566.4	-0.151653	0.329383	-0.460415	0.645218	0.813673	BRK1
6318.23	-0.226303	0.356398	-0.634972	0.525447	0.730862	BRMS1
953.291	-0.187665	0.327369	-0.573252	0.566474	0.763516	BRMS1L
2285.5	-0.0452949	0.208185	-0.21757	0.827764	0.914591	BROX
2654.92	-0.0594479	0.166789	-0.356426	0.721521	0.85584	BRPF1
3551.26	0.235763	0.282443	0.834726	0.403872	0.627617	BRPF3
34.4985	6.6347	1.15256	5.75648	8.58876e-09	1.24224e-07	BRS3
856.957	-0.437062	0.179379	-2.43653	0.014829	0.0581562	BRSK1
1095.33	-0.369945	0.211404	-1.74995	0.0801276	0.214573	BRSK2
2535.85	-0.0859244	0.254688	-0.337371	0.735837	0.863271	BRWD1
22.5612	-1.94431	0.706331	-2.75269	0.00591082	0.026958	BRWD3
4493.16	-1.40262	0.494938	-2.83393	0.0045979	0.0217396	BSCL2
7525.39	-0.0474174	0.137322	-0.3453	0.729869	0.860048	BSDC1
37109.7	0.143914	0.276846	0.519834	0.603179	0.788173	BSG
723.833	-0.338001	0.484266	-0.697966	0.485198	0.698136	BSN
1.23094	2.49476	2.19564	1.13623	0.255859	0.472472	BSND
0	NA	NA	NA	NA	NA	BSPH1
7.94524	3.81652	1.1068	3.44825	0.00056424	0.00354635	BSPRY
5.20745	-0.987478	1.05038	-0.940112	0.34716	0.570805	BST1
247.297	6.3451	0.621369	10.2115	1.7616e-24	8.53249e-23	BST2
0	NA	NA	NA	NA	NA	BSX
2324.24	0.12086	0.496995	0.243182	0.807864	0.90352	BTAF1
9073.46	-0.0653465	0.300612	-0.217379	0.827913	0.914591	BTBD1
2692.35	0.130675	0.16966	0.770218	0.441171	0.660033	BTBD10
102.584	9.07467	1.24295	7.3009	2.8585e-13	6.60588e-12	BTBD11
3.74787	1.77218	1.35091	1.31184	0.189575	0.392446	BTBD16
0.65833	2.81131	2.96982	0.946625	0.34383	NA	BTBD17
2.90584	0.509489	1.24485	0.409277	0.682337	0.83449	BTBD18
89.8045	0.457374	0.399326	1.14537	0.252057	0.468255	BTBD19
10750.4	-0.0703082	0.149813	-0.469307	0.63885	0.809683	BTBD2
2497.4	-0.706535	0.370649	-1.90621	0.0566231	0.165571	BTBD3
3486.27	-0.181447	0.247468	-0.733214	0.463428	0.679586	BTBD6
3035.3	0.0301348	0.31688	0.0950986	0.924237	0.96344	BTBD7
27.7299	0.281819	1.09662	0.256989	0.797187	0.898214	BTBD8
2058.34	0.266283	0.338901	0.785725	0.432028	0.652105	BTBD9
3.24975	2.42603	1.64811	1.47201	0.141019	0.322135	BTC
1126.89	-0.263708	0.183178	-1.43963	0.149972	0.335369	BTD
41620.5	-0.252936	0.309305	-0.817757	0.413496	0.635761	BTF3
4646.88	-0.161811	0.167107	-0.968313	0.332888	0.557381	BTF3L4
2586.34	2.13557	0.166012	12.8639	7.18343e-38	6.76217e-36	BTG1
[truncated: 17,900 more rows]

## Sheet: B. COV434 - RNAseq
baseMean	log2FoldChange	lfcSE	stat	pvalue	padj	Gene
899.239	-0.498391	0.159082	-3.13292	0.00173076	0.0163879	A1BG
2.95531	0.304507	1.59323	0.191126	0.848427	0.959818	A1CF
28117.2	-0.951401	0.245507	-3.87525	0.000106517	0.00131979	A2M
70.8022	-1.20644	0.540683	-2.23132	0.0256601	0.148233	A2ML1
0.777994	3.0108	3.73628	0.805829	0.420342	NA	A3GALT2
613.489	0.18332	0.257659	0.711485	0.476784	0.811542	A4GALT
0.242198	1.53756	4.04672	0.379952	0.703981	NA	A4GNT
1762.29	0.0282191	0.201309	0.140178	0.888519	0.971812	AAAS
7602.93	-0.180205	0.121167	-1.48725	0.13695	0.4561	AACS
4.10635	4.41118	1.6463	2.67945	0.00737429	0.0560643	AADAC
0	NA	NA	NA	NA	NA	AADACL2
1.93985	4.36459	2.34202	1.8636	0.0623776	0.281178	AADACL3
2.60355	4.7849	2.09019	2.28922	0.0220665	0.132102	AADACL4
299.739	-0.113333	0.201345	-0.56288	0.573517	0.862134	AADAT
595.324	0.230609	0.299758	0.769317	0.441705	0.785169	AAED1
3098.05	-0.000111299	0.148709	-0.000748438	0.999403	0.999513	AAGAB
2349.84	0.393332	0.251424	1.56442	0.11772	0.417364	AAK1
649.031	-0.0223915	0.194981	-0.11484	0.908572	0.976279	AAMDC
6326.16	-0.0432829	0.1233	-0.351038	0.72556	0.924785	AAMP
4.19544	1.91325	1.27554	1.49995	0.133626	0.450254	AANAT
2095.58	0.0447607	0.126979	0.352506	0.724459	0.924679	AAR2
6.63509	0.531085	0.879632	0.603758	0.546005	0.850224	AARD
14528.1	-0.0156926	0.228932	-0.0685467	0.94535	0.987328	AARS
1207.57	0.118829	0.262044	0.453469	0.650211	0.894306	AARS2
1464.27	-0.199481	0.151234	-1.31902	0.187162	0.540698	AARSD1
412.471	0.0645035	0.27821	0.231852	0.816653	0.951478	AASDH
2735.61	-0.150419	0.139853	-1.07554	0.282131	0.659022	AASDHPPT
2141.66	-0.409474	0.301689	-1.35727	0.174695	0.523508	AASS
3889.54	-0.0218383	0.132959	-0.164248	0.869536	0.965761	AATF
875.733	-0.274949	0.210584	-1.30565	0.19167	0.547883	AATK
1019.3	0.114785	0.227256	0.505094	0.613493	0.880365	ABAT
71.5482	1.00921	0.462981	2.1798	0.0292726	0.163094	ABC7-42404400C24.1
78.1809	4.59084	0.679098	6.76021	1.37792e-11	4.06664e-10	ABCA1
1.23323	1.37481	2.79315	0.492207	0.622573	NA	ABCA10
6.27566	1.81558	1.32099	1.37441	0.169316	0.514323	ABCA12
8.21635	-0.729228	1.01989	-0.715005	0.474606	0.809792	ABCA13
7356.39	-0.285252	0.19891	-1.43408	0.151551	0.484647	ABCA2
5632.1	-0.321466	0.203913	-1.57649	0.114914	0.4113	ABCA3
166.863	7.28427	0.65979	11.0403	2.44279e-28	2.19522e-26	ABCA4
63.9154	-0.373746	0.40064	-0.93287	0.350887	0.722401	ABCA5
0	NA	NA	NA	NA	NA	ABCA6
5880.9	-0.398356	0.345585	-1.1527	0.249033	0.624183	ABCA7
12.5172	-0.280901	0.944089	-0.297537	0.766057	0.937802	ABCA8
0.393683	-2.12199	4.0251	-0.527189	0.598063	NA	ABCA9
5.00977	2.62415	1.55801	1.6843	0.0921246	0.361271	ABCB1
1194.88	-0.0685008	0.149505	-0.458185	0.646819	0.892742	ABCB10
10.4861	-0.710761	0.689582	-1.03071	0.302675	0.679825	ABCB11
2.74013	-0.459725	1.74754	-0.26307	0.792496	0.944975	ABCB4
1.0886	0.0754409	2.07922	0.0362832	0.971057	NA	ABCB5
1587.3	-0.0118651	0.215667	-0.0550157	0.956126	0.990043	ABCB6
692.69	-0.0568321	0.179004	-0.31749	0.750872	0.932744	ABCB7
1218.04	0.111673	0.193215	0.577975	0.563281	0.857057	ABCB8
694.049	-0.209893	0.152004	-1.38084	0.167329	0.510702	ABCB9
5243.46	0.182951	0.209882	0.871685	0.38338	0.746247	ABCC1
1214.21	-0.0966337	0.268612	-0.359752	0.719032	0.922937	ABCC10
33.2789	-0.494463	0.454169	-1.08872	0.276277	0.653069	ABCC11
0	NA	NA	NA	NA	NA	ABCC12
18.1232	1.24022	0.587173	2.11219	0.0346703	0.185504	ABCC2
8.49939	6.48595	1.81704	3.56951	0.00035765	0.00396739	ABCC3
2956.96	0.276064	0.117113	2.35725	0.0184109	0.115355	ABCC4
2511.93	-0.0221439	0.189078	-0.117116	0.906768	0.975968	ABCC5
27.6785	-0.12373	0.560288	-0.220833	0.825223	0.953679	ABCC6
58.0401	-0.154946	0.430003	-0.360337	0.718595	0.922504	ABCC8
14.8736	-1.32489	0.712101	-1.86054	0.0628095	0.282537	ABCC9
874.288	-0.0609101	0.199802	-0.304852	0.760479	0.936638	ABCD1
2087.12	-0.767432	0.250321	-3.06579	0.00217093	0.0199232	ABCD2
1810.77	-0.0874037	0.210311	-0.415593	0.677708	0.905573	ABCD3
942.489	0.232525	0.211381	1.10003	0.271321	0.648155	ABCD4
5330.38	-0.289014	0.155234	-1.86179	0.0626326	0.282135	ABCE1
6939.23	0.033439	0.178858	0.186959	0.851693	0.96038	ABCF1
5437.3	0.0269101	0.118769	0.226574	0.820755	0.952161	ABCF2
3250.45	-0.00810428	0.135565	-0.0597817	0.952329	0.989314	ABCF3
21.7671	3.00337	0.7047	4.26192	2.02679e-05	0.000284641	ABCG1
0.631175	2.72735	3.1796	0.857767	0.391021	NA	ABCG2
261.501	0.073592	0.34929	0.21069	0.833129	0.956461	ABCG4
0	NA	NA	NA	NA	NA	ABCG5
0.249661	0.870599	4.08047	0.213357	0.831048	NA	ABCG8
17.9906	-0.11729	0.582296	-0.201428	0.840364	0.958114	ABHD1
610.096	0.492954	0.180242	2.73496	0.00623881	0.0487523	ABHD10
1079.59	-0.206005	0.149526	-1.37771	0.168292	0.512273	ABHD11
3314.45	0.213683	0.135993	1.57128	0.116119	0.414052	ABHD12
27.5755	-0.053945	0.542171	-0.0994981	0.920743	0.980125	ABHD12B
726.657	-0.0830658	0.197465	-0.42066	0.674003	0.903528	ABHD13
404.942	-0.00134378	0.172967	-0.00776899	0.993801	0.998583	ABHD14A
22.9004	-0.454321	0.595201	-0.763305	0.445281	0.787661	ABHD14A-ACY1
2844.5	-0.139102	0.159295	-0.873231	0.382537	0.745954	ABHD14B
1414.77	-0.162623	0.293396	-0.55428	0.579387	0.863977	ABHD15
2248.91	0.359709	0.175667	2.04768	0.0405918	0.209094	ABHD16A
3.18201	-5.16799	3.24089	-1.59462	0.110796	0.401699	ABHD16B
4181.23	-0.0825502	0.147797	-0.558538	0.576477	0.863177	ABHD17A
710.887	-0.10469	0.154751	-0.676506	0.49872	0.822922	ABHD17B
829.373	0.0447358	0.1665	0.268684	0.788173	0.943931	ABHD17C
362.435	0.0681631	0.27467	0.248164	0.804008	0.947047	ABHD18
1775.86	0.00321853	0.188408	0.0170828	0.986371	0.996963	ABHD2
671.008	-0.291889	0.242187	-1.20522	0.228117	0.598047	ABHD3
564.802	0.505747	0.187851	2.69228	0.00709649	0.0542997	ABHD4
564.534	0.916786	0.356548	2.57128	0.0101323	0.0721945	ABHD5
440.834	-0.123762	0.266837	-0.463809	0.642785	0.891489	ABHD6
1722.17	-0.142157	0.146626	-0.969521	0.332285	0.707284	ABHD8
2369.66	-0.187087	0.184647	-1.01321	0.310958	0.687346	ABI1
8343.53	-0.375373	0.129556	-2.89739	0.00376281	0.0318465	ABI2
5.04614	-0.0475584	1.1279	-0.0421654	0.966367	0.992052	ABI3
41.564	1.39873	0.503791	2.77641	0.00549622	0.0439588	ABI3BP
15423.7	-0.0868177	0.158411	-0.548053	0.583656	0.865026	ABL1
2654.72	0.74457	0.317479	2.34526	0.0190139	0.118299	ABL2
472.334	4.99244	0.499015	10.0046	1.45493e-23	1.02075e-21	ABLIM1
292.071	1.07607	0.339905	3.16579	0.00154662	0.0148945	ABLIM2
67.686	3.98674	0.574845	6.93533	4.05269e-12	1.26122e-10	ABLIM3
0	NA	NA	NA	NA	NA	ABO
2663.32	0.242188	0.201749	1.20044	0.229968	0.600572	ABR
1.62934	-0.218288	1.85946	-0.117393	0.906548	NA	ABRA
70.6436	1.43947	0.517465	2.78178	0.00540616	0.0433469	ABRACL
2532.21	-0.103983	0.15126	-0.68744	0.491805	0.819373	ABT1
701.722	0.140766	0.282433	0.498404	0.618199	0.881551	ABTB1
253.583	2.18415	0.377945	5.77901	7.5142e-09	1.65561e-07	ABTB2
5.40012	-1.55736	2.07027	-0.75225	0.451901	0.792596	AC002310.11
0	NA	NA	NA	NA	NA	AC002310.13
91.2638	0.376131	0.458259	0.820784	0.411769	0.766337	AC002398.9
4.88219	0.048142	1.13831	0.0422926	0.966265	0.992052	AC002985.3
0.696403	2.89203	3.97004	0.728464	0.466329	NA	AC003002.4
5.56375	-1.16381	1.03692	-1.12237	0.261704	0.637754	AC003002.6
0	NA	NA	NA	NA	NA	AC003005.4
3.26194	0.847014	1.43037	0.592166	0.553739	0.855161	AC003006.7
0	NA	NA	NA	NA	NA	AC004076.7
2.9961	0.566593	1.79864	0.315012	0.752752	0.933775	AC004076.9
0	NA	NA	NA	NA	NA	AC004158.1
81.9897	6.37745	1.5995	3.98716	6.68701e-05	0.00085916	AC004231.7
356.465	-0.163198	0.199368	-0.818575	0.413029	0.767787	AC004381.6
1154.14	-0.364306	0.132104	-2.75773	0.00582048	0.0460457	AC004556.1
53.1762	-0.0502457	0.402363	-0.124876	0.900621	0.973696	AC004754.3
0.901896	1.18347	2.51227	0.471075	0.637587	NA	AC004813.1
0	NA	NA	NA	NA	NA	AC004824.2
0	NA	NA	NA	NA	NA	AC004824.3
0.590525	-2.71368	3.98579	-0.680837	0.495975	NA	AC004853.1
0	NA	NA	NA	NA	NA	AC004953.1
0	NA	NA	NA	NA	NA	AC005042.1
0.249661	0.870599	4.08047	0.213357	0.831048	NA	AC005477.1
1.04258	0.813709	2.40448	0.338414	0.735051	NA	AC005480.1
0.590525	-2.71368	3.98579	-0.680837	0.495975	NA	AC005779.2
533.389	0.147543	0.214266	0.6886	0.491075	0.819309	AC005943.2
0.242198	1.53756	4.04672	0.379952	0.703981	NA	AC006026.2
0	NA	NA	NA	NA	NA	AC006328.4
7.6977	-0.477303	0.813336	-0.586846	0.557307	0.855659	AC006386.1
0	NA	NA	NA	NA	NA	AC006445.1
89.4603	-0.313305	0.327239	-0.957419	0.338356	0.712525	AC006449.1
89.4603	-0.313305	0.327239	-0.957419	0.338356	0.712525	AC006449.2
11.61	-1.23924	1.1966	-1.03563	0.300373	0.678452	AC006486.9
0	NA	NA	NA	NA	NA	AC006538.4
0	NA	NA	NA	NA	NA	AC006994.3
17.7504	1.33348	0.5823	2.29003	0.0220196	0.131871	AC007040.11
0.324747	-1.87196	4.04712	-0.46254	0.643694	NA	AC007163.2
103.821	-0.016457	0.579526	-0.0283974	0.977345	0.995264	AC007192.4
0.278561	1.67229	4.03923	0.414012	0.678866	NA	AC007325.1
83.8896	0.796626	0.332461	2.39615	0.0165683	0.10665	AC007325.2
937.784	-0.341538	0.16761	-2.0377	0.0415802	0.213247	AC007325.4
3.17478	-0.883541	1.71993	-0.513707	0.607457	0.877429	AC007326.1
0	NA	NA	NA	NA	NA	AC007557.5
10.5095	0.0335754	1.79076	0.0187492	0.985041	0.996945	AC007906.1
44.7366	0.0963174	0.587628	0.163909	0.869803	0.965761	AC008074.1
104.143	0.384991	1.71996	0.223837	0.822884	0.95255	AC008522.1
0	NA	NA	NA	NA	NA	AC008622.1
0	NA	NA	NA	NA	NA	AC008641.1
0	NA	NA	NA	NA	NA	AC008686.1
0	NA	NA	NA	NA	NA	AC008759.1
0.196842	-1.05295	4.08047	-0.258047	0.796371	NA	AC008810.1
0	NA	NA	NA	NA	NA	AC008914.1
0	NA	NA	NA	NA	NA	AC009022.1
2.26319	-0.654317	1.71623	-0.381252	0.703016	0.916247	AC009060.2
3.04741	0.346547	1.30784	0.264976	0.791028	0.944962	AC009060.3
5.49536	-5.94323	2.96135	-2.00694	0.0447564	0.224635	AC009065.4
0	NA	NA	NA	NA	NA	AC009121.2
165.948	-0.528824	0.457367	-1.15623	0.247586	0.622064	AC009133.22
18.2174	-0.518168	2.63951	-0.196312	0.844366	0.958561	AC009133.23
0	NA	NA	NA	NA	NA	AC009336.19
0	NA	NA	NA	NA	NA	AC009491.1
0	NA	NA	NA	NA	NA	AC009491.2
0	NA	NA	NA	NA	NA	AC009758.1
180.987	2.04225	0.256495	7.96214	1.69082e-15	7.25105e-14	AC009950.1
0	NA	NA	NA	NA	NA	AC009977.1
0	NA	NA	NA	NA	NA	AC010184.1
0.463504	0.647848	3.60348	0.179784	0.857322	NA	AC010287.1
0	NA	NA	NA	NA	NA	AC010412.1
47.905	-1.03329	0.512844	-2.01481	0.0439242	0.221155	AC010547.9
205.082	-0.198438	0.328943	-0.60326	0.546336	0.850446	AC010642.1
0.278561	1.67229	4.03923	0.414012	0.678866	NA	AC010646.3
0	NA	NA	NA	NA	NA	AC010655.1
427.883	-0.263871	0.314251	-0.839682	0.401087	0.760004	AC011043.1
4.16759	1.07763	1.51987	0.709026	0.478308	0.812235	AC011043.2
0	NA	NA	NA	NA	NA	AC011155.1
0.635214	-0.482878	3.99108	-0.120989	0.9037	NA	AC011295.1
0	NA	NA	NA	NA	NA	AC011380.1
0	NA	NA	NA	NA	NA	AC011513.3
3.04974	-0.375507	1.52203	-0.246715	0.805129	0.947322	AC011530.4
3.73801	-0.218765	1.77698	-0.123111	0.902019	0.974135	AC011841.1
19.7645	-0.283856	0.59313	-0.478572	0.632243	0.887069	AC012005.3
0	NA	NA	NA	NA	NA	AC012005.4
3524.13	-0.795175	0.430587	-1.84672	0.0647874	0.288277	AC012314.2
3573.57	-0.777099	0.433506	-1.79259	0.0730385	0.312053	AC012314.3
3524.13	-0.795175	0.430587	-1.84672	0.0647875	0.288277	AC012314.5
3524.13	-0.795173	0.430588	-1.84672	0.0647883	0.288277	AC012314.6
3524.13	-0.795175	0.430587	-1.84672	0.0647875	0.288277	AC012314.7
3524.13	-0.795175	0.430587	-1.84672	0.0647875	0.288277	AC012314.9
0	NA	NA	NA	NA	NA	AC012363.2
0	NA	NA	NA	NA	NA	AC013269.5
0	NA	NA	NA	NA	NA	AC013286.1
1964.03	0.0792031	0.121693	0.650846	0.515146	0.833587	AC013461.1
2.08349	1.19791	2.4508	0.488783	0.624996	0.88405	AC015688.3
0.121099	0.870599	4.08047	0.213357	0.831048	NA	AC016142.1
0.45717	0.648947	3.61566	0.179482	0.857559	NA	AC016549.1
0	NA	NA	NA	NA	NA	AC016577.1
0	NA	NA	NA	NA	NA	AC016734.1
0	NA	NA	NA	NA	NA	AC016753.2
0	NA	NA	NA	NA	NA	AC017028.10
8.18539	-0.302334	0.847526	-0.356725	0.721298	0.923991	AC017081.1
0	NA	NA	NA	NA	NA	AC018512.1
0.324197	-1.87022	4.04718	-0.462105	0.644006	NA	AC018755.18
0	NA	NA	NA	NA	NA	AC018867.1
0	NA	NA	NA	NA	NA	AC018902.1
0	NA	NA	NA	NA	NA	AC019206.1
6.60091	-0.821964	0.870418	-0.944332	0.345	0.717068	AC021106.1
0	NA	NA	NA	NA	NA	AC022016.1
0	NA	NA	NA	NA	NA	AC022210.1
0	NA	NA	NA	NA	NA	AC022405.1
0	NA	NA	NA	NA	NA	AC022819.2
0.242198	1.53756	4.04672	0.379952	0.703981	NA	AC023491.2
0	NA	NA	NA	NA	NA	AC024060.1
0	NA	NA	NA	NA	NA	AC024361.1
91.9643	-0.137591	0.320316	-0.429547	0.667525	0.901265	AC024592.12
0.121099	0.870599	4.08047	0.213357	0.831048	NA	AC025263.3
1.77488	2.35203	2.09605	1.12213	0.261809	0.637831	AC026248.1
0.909599	3.26524	2.79129	1.1698	0.242083	NA	AC026369.1
0	NA	NA	NA	NA	NA	AC026449.1
8.65552	1.03344	1.60031	0.645775	0.518425	0.835573	AC037459.4
3.8016	5.33813	2.31856	2.30234	0.0213158	0.128667	AC037482.2
0.139246	0.874543	4.08047	0.214324	0.830294	NA	AC044810.2
0.406831	0.720239	4.03914	0.178315	0.858476	NA	AC055733.1
0	NA	NA	NA	NA	NA	AC055866.1
0	NA	NA	NA	NA	NA	AC063956.1
0	NA	NA	NA	NA	NA	AC063956.2
0	NA	NA	NA	NA	NA	AC064829.1
0.12728	-1.05295	4.08047	-0.258047	0.796371	NA	AC066615.1
32.4858	-0.391063	0.49933	-0.783174	0.433525	0.780228	AC068533.7
0	NA	NA	NA	NA	NA	AC069063.1
0	NA	NA	NA	NA	NA	AC069063.2
9.13833	-0.00773294	1.09887	-0.00703717	0.994385	0.99862	AC069368.3
0	NA	NA	NA	NA	NA	AC069499.1
0	NA	NA	NA	NA	NA	AC073072.1
0	NA	NA	NA	NA	NA	AC073130.2
5.13313	-0.80665	1.0709	-0.753244	0.451303	0.792083	AC073333.1
0	NA	NA	NA	NA	NA	AC073610.5
0	NA	NA	NA	NA	NA	AC073657.1
0	NA	NA	NA	NA	NA	AC074033.1
0	NA	NA	NA	NA	NA	AC079355.1
0	NA	NA	NA	NA	NA	AC079907.1
74.5931	0.321256	0.566789	0.5668	0.57085	0.860389	AC084219.2
0	NA	NA	NA	NA	NA	AC087350.1
0	NA	NA	NA	NA	NA	AC087392.1
0	NA	NA	NA	NA	NA	AC087651.1
0	NA	NA	NA	NA	NA	AC087651.2
0.254561	-1.63998	4.06208	-0.40373	0.686411	NA	AC087762.1
0	NA	NA	NA	NA	NA	AC090154.1
27105.6	-0.430746	0.16315	-2.64019	0.00828597	0.0616763	AC090498.1
0	NA	NA	NA	NA	NA	AC090958.1
0	NA	NA	NA	NA	NA	AC091180.1
0	NA	NA	NA	NA	NA	AC091304.2
0	NA	NA	NA	NA	NA	AC092159.1
0	NA	NA	NA	NA	NA	AC092384.1
1.22633	3.68977	3.21696	1.14698	0.251392	NA	AC092718.1
59.0131	-0.0718718	0.358593	-0.200427	0.841146	0.958114	AC092835.2
5.82148	0.379125	1.34733	0.281389	0.778412	0.940941	AC092881.1
0	NA	NA	NA	NA	NA	AC100821.2
0	NA	NA	NA	NA	NA	AC104057.1
0	NA	NA	NA	NA	NA	AC104073.2
0	NA	NA	NA	NA	NA	AC104389.1
0	NA	NA	NA	NA	NA	AC104389.2
2.34709	-0.301814	1.84883	-0.163246	0.870325	0.965914	AC104532.2
3.50923	0.960234	2.19974	0.436521	0.662459	0.899325	AC104534.3
0	NA	NA	NA	NA	NA	AC104581.1
0	NA	NA	NA	NA	NA	AC104650.2
0.121099	0.870599	4.08047	0.213357	0.831048	NA	AC104981.1
0	NA	NA	NA	NA	NA	AC105009.1
1.481	-0.843536	2.16737	-0.389198	0.69713	NA	AC105052.2
0	NA	NA	NA	NA	NA	AC107081.1
0.762874	-0.129141	3.20471	-0.0402973	0.967856	NA	AC108925.1
0.864327	-3.27485	3.56792	-0.917859	0.358693	NA	AC108938.5
0	NA	NA	NA	NA	NA	AC109344.1
7.73516	0.549405	0.831899	0.660423	0.508983	0.828654	AC109486.1
3.47994	0.6	1.42219	0.421884	0.67311	0.902935	AC109829.1
0.325198	-0.0920431	4.08047	-0.022557	0.982004	NA	AC109829.2
0	NA	NA	NA	NA	NA	AC110602.1
5.1897	0.563425	1.3545	0.415967	0.677434	0.905434	AC110615.1
0	NA	NA	NA	NA	NA	AC112719.2
4735.5	-0.310242	0.228278	-1.35905	0.17413	0.522529	AC113404.1
0	NA	NA	NA	NA	NA	AC118758.1
0	NA	NA	NA	NA	NA	AC123512.1
0.203157	-1.05295	4.08047	-0.258047	0.796371	NA	AC123512.2
0	NA	NA	NA	NA	NA	AC123512.3
1.84979	-3.29723	1.98719	-1.65924	0.0970668	0.372377	AC124312.1
0	NA	NA	NA	NA	NA	AC126407.1
75.8795	-0.0292551	0.428511	-0.0682715	0.94557	0.987328	AC129492.1
19.6097	0.246365	0.548633	0.449054	0.653393	0.895106	AC130310.1
0	NA	NA	NA	NA	NA	AC131263.1
1.24831	3.68999	3.94339	0.935741	0.349407	NA	AC133551.1
0	NA	NA	NA	NA	NA	AC136352.4
0.381841	-2.14622	4.02317	-0.533464	0.593712	NA	AC136352.5
4.88674	-1.48626	1.46044	-1.01768	0.308829	0.68572	AC136612.1
706.792	-0.187528	0.168586	-1.11236	0.265985	0.642702	AC136616.1
0	NA	NA	NA	NA	NA	AC136616.2
0	NA	NA	NA	NA	NA	AC136616.3
0	NA	NA	NA	NA	NA	AC138028.1
4877.6	0.370938	0.188417	1.96871	0.0489869	0.239193	AC138969.4
0	NA	NA	NA	NA	NA	AC141272.1
0	NA	NA	NA	NA	NA	AC142525.1
364.648	0.287508	0.239319	1.20135	0.229614	0.60019	AC145212.2
568.011	0.247271	0.187941	1.31569	0.188279	0.54228	AC145212.4
0.439064	0.576586	4.04671	0.142483	0.886699	NA	AC156455.2
0	NA	NA	NA	NA	NA	AC171558.1
0	NA	NA	NA	NA	NA	AC171558.2
2.05492	-3.37041	2.4705	-1.36426	0.172485	0.519904	AC208162.1
0	NA	NA	NA	NA	NA	AC213203.1
0	NA	NA	NA	NA	NA	AC231657.1
0.139281	0.870599	4.08047	0.213357	0.831048	NA	AC233755.1
0.342902	-0.0980373	4.08047	-0.024026	0.980832	NA	AC233755.2
1.04606	0.618795	2.9623	0.20889	0.834534	NA	AC234582.1
0	NA	NA	NA	NA	NA	AC234582.2
0.603272	-2.74192	3.98428	-0.688185	0.491337	NA	AC236040.1
1433.07	-0.131184	0.124287	-1.05549	0.291202	0.668301	AC240274.1
38.6038	0.0600593	0.549493	0.109299	0.912965	0.977875	AC241377.2
126.197	0.572827	0.328074	1.74603	0.0808058	0.333051	AC241585.2
0	NA	NA	NA	NA	NA	AC242988.1
52.4592	-0.0693973	0.446588	-0.155394	0.87651	0.967941	AC243687.1
0.196842	-1.05295	4.08047	-0.258047	0.796371	NA	AC243756.1
0	NA	NA	NA	NA	NA	AC243790.2
0.12728	-1.05295	4.08047	-0.258047	0.796371	NA	AC243945.1
0	NA	NA	NA	NA	NA	AC245015.1
96.831	0.448771	0.369734	1.21377	0.224837	0.592952	AC245100.1
61.0959	0.0762052	0.361047	0.211067	0.832835	0.956461	AC253572.1
0	NA	NA	NA	NA	NA	AC254560.1
1.1702	3.64559	3.1801	1.14637	0.25164	NA	AC254788.1
2.05492	-3.37041	2.4705	-1.36426	0.172485	0.519904	AC254847.1
36.358	-0.0214217	0.513872	-0.0416868	0.966748	0.992113	AC254944.3
18.3552	-0.317994	0.811394	-0.391911	0.695124	0.91257	AC254995.1
2164.36	-0.00384199	0.135062	-0.0284461	0.977306	0.995264	ACAA1
2976.52	-0.0398152	0.164745	-0.241678	0.80903	0.948955	ACAA2
5149.07	0.045022	0.175889	0.255968	0.797975	0.945596	ACACA
676.377	-0.205859	0.223482	-0.921145	0.356975	0.726925	ACACB
1453.13	-0.206598	0.206949	-0.998306	0.318131	0.693872	ACAD10
2370.14	-0.436337	0.136855	-3.18833	0.00143099	0.0138812	ACAD11
1420.04	-0.210317	0.137193	-1.533	0.125276	0.432532	ACAD8
1911.89	-0.0124307	0.169481	-0.0733456	0.941531	0.986166	ACAD9
0.196842	-1.05295	4.08047	-0.258047	0.796371	NA	ACADL
1240.9	-0.0476364	0.156908	-0.303595	0.761437	0.936795	ACADM
307.176	0.881166	0.252831	3.4852	0.000491767	0.00531866	ACADS
1559.87	-0.167697	0.217993	-0.769276	0.44173	0.785169	ACADSB
18115.6	0.0113843	0.179884	0.0632868	0.949538	0.988538	ACADVL
12.6395	0.605988	0.91653	0.661176	0.508499	0.82856	ACAN
325.025	-0.34988	0.248462	-1.40818	0.159077	0.49612	ACAP1
1686.95	-0.268141	0.163783	-1.63717	0.101596	0.382401	ACAP2
2789.03	0.041101	0.165146	0.248877	0.803456	0.946986	ACAP3
3609.69	-0.335315	0.168357	-1.99169	0.0464048	0.230168	ACAT1
1235.83	-0.732204	0.195774	-3.74006	0.000183979	0.00217601	ACAT2
2865.96	-0.0918363	0.228126	-0.402568	0.687266	0.909755	ACBD3
977.294	0.085367	0.214007	0.398899	0.689968	0.911147	ACBD4
1162.24	0.0689513	0.197642	0.34887	0.727187	0.9253	ACBD5
2061.65	-0.0789447	0.122794	-0.642902	0.520288	0.83621	ACBD6
11.7154	0.438966	0.685787	0.640091	0.522114	0.83693	ACBD7
268.296	-0.0335307	0.31822	-0.10537	0.916082	0.978607	ACCS
0	NA	NA	NA	NA	NA	ACCSL
1365.82	-0.166817	0.170482	-0.978501	0.327826	0.702803	ACD
0.267925	1.62964	4.04328	0.40305	0.686911	NA	ACE
106.753	4.84163	0.468897	10.3256	5.39984e-25	4.09364e-23	ACE2
0	NA	NA	NA	NA	NA	ACER1
352.347	-0.144783	0.185119	-0.78211	0.43415	0.780887	ACER2
905.235	0.00324454	0.198462	0.0163484	0.986956	0.996991	ACER3
187.819	2.13583	0.534912	3.99286	6.52805e-05	0.000840762	ACHE
9184.56	0.0722945	0.202406	0.357176	0.72096	0.923929	ACIN1
65.2508	7.56516	1.06014	7.13602	9.60704e-13	3.16202e-11	ACKR1
48.0538	2.23802	0.797225	2.80726	0.00499653	0.0405503	ACKR2
340.015	8.2427	0.780728	10.5577	4.67939e-26	3.70552e-24	ACKR3
19.8191	1.34962	0.662566	2.03697	0.0416534	0.213554	ACKR4
12324.4	-0.187014	0.155123	-1.20558	0.227979	0.597976	ACLY
1.98007	-0.397645	1.72745	-0.230192	0.817942	0.951745	ACMSD
2486.29	-0.855862	0.117201	-7.30255	2.82369e-13	9.75544e-12	ACO1
8253.02	-0.118675	0.138491	-0.856916	0.391491	0.754493	ACO2
484.525	-0.100149	0.243485	-0.411315	0.680842	0.906891	ACOT1
9.49494	1.35398	0.846979	1.5986	0.109911	0.40046	ACOT11
1.17984	1.54469	2.74993	0.56172	0.574307	NA	ACOT12
2085.55	-0.190925	0.159034	-1.20053	0.229933	0.600572	ACOT13
2439.19	-0.0456201	0.180027	-0.253407	0.799954	0.94623	ACOT2
1.59351	0.221701	1.9006	0.116648	0.907139	NA	ACOT4
1.35469	0.698009	2.22513	0.313693	0.753754	NA	ACOT6
9816.04	-0.170174	0.152069	-1.11905	0.263118	0.639058	ACOT7
854.96	0.0707171	0.178912	0.395262	0.692649	0.911603	ACOT8
2136.8	0.206232	0.177795	1.15994	0.246072	0.620358	ACOT9
2385.61	0.0452685	0.164436	0.275295	0.783089	0.942296	ACOX1
2.72635	3.72589	1.8125	2.05566	0.0398152	0.205978	ACOX2
1003.1	0.162518	0.229176	0.70914	0.478237	0.812235	ACOX3
1.46634	-0.184999	2.20409	-0.0839347	0.933108	NA	ACOXL
3466.58	-0.217321	0.166146	-1.30801	0.19087	0.546866	ACP1
1250.16	0.494515	0.140035	3.53136	0.000413433	0.00453585	ACP2
1.51702	-1.12159	2.22159	-0.50486	0.613657	NA	ACP5
349.983	-0.14678	0.264923	-0.55405	0.579545	0.863996	ACP6
0.532992	-1.16041	4.02509	-0.288293	0.773122	NA	ACP7
62.2344	-0.985827	0.466985	-2.11105	0.0347684	0.185881	ACPP
0.381635	2.04714	4.01912	0.509351	0.610506	NA	ACPT
2.12478	3.53816	1.99062	1.77741	0.0755002	0.318235	ACR
4.48058	1.64399	1.24546	1.31998	0.186841	0.54068	ACRBP
71.8442	0.283945	0.511539	0.555079	0.578841	0.863833	ACRC
3.75347	0.534206	1.16777	0.45746	0.647341	0.892742	ACRV1
25.0868	0.161054	0.537887	0.299419	0.76462	0.937347	ACSBG1
1.43657	0.304346	1.93904	0.156957	0.875279	NA	ACSBG2
944.816	-0.123312	0.282689	-0.43621	0.662684	0.899325	ACSF2
1242.74	0.240502	0.165642	1.45194	0.146519	0.475112	ACSF3
2168.87	-0.245436	0.115847	-2.11862	0.0341228	0.18341	ACSL1
2841.54	-0.0941647	0.208418	-0.451807	0.651408	0.894567	ACSL3
1188.08	0.617471	0.206222	2.9942	0.00275164	0.0244258	ACSL4
64.9857	9.42574	1.27155	7.4128	1.23661e-13	4.40554e-12	ACSL5
48.4603	0.190107	0.415805	0.457202	0.647526	0.892839	ACSL6
1.70955	3.21763	2.46383	1.30595	0.19157	NA	ACSM1
0.884282	3.24459	3.50695	0.925189	0.354868	NA	ACSM2A
0	NA	NA	NA	NA	NA	ACSM2B
34.9227	2.55545	0.548666	4.65757	3.19966e-06	5.06749e-05	ACSM3
0	NA	NA	NA	NA	NA	ACSM4
2.34296	4.65755	2.09617	2.22193	0.0262879	0.150604	ACSM5
0	NA	NA	NA	NA	NA	ACSM6
0.139281	0.870599	4.08047	0.213357	0.831048	NA	ACSS1
2973.88	0.856426	0.168369	5.0866	3.64536e-07	6.56954e-06	ACSS2
3.41437	-0.790069	1.25392	-0.630082	0.528641	0.84149	ACSS3
91.7084	-0.143906	0.309741	-0.464602	0.642217	0.891126	ACTA1
6512.11	0.120315	0.130674	0.92073	0.357191	0.726925	ACTA2
276838	0.164277	0.131198	1.25213	0.210521	0.576034	ACTB
736.25	6.19719	0.40715	15.2209	2.56897e-52	6.22625e-50	ACTBL2
0.260311	1.60623	4.04281	0.397305	0.691143	NA	ACTC1
243692	-0.238682	0.172785	-1.38138	0.167162	0.51029	ACTG1
35.0917	1.53308	0.634677	2.41553	0.0157122	0.102543	ACTG2
4.93619	0.0115955	1.06929	0.0108441	0.991348	0.998004	ACTL10
2334	-0.369551	0.190926	-1.93557	0.0529208	0.251044	ACTL6A
8.84577	-0.969763	0.780331	-1.24276	0.213957	0.580806	ACTL6B
0	NA	NA	NA	NA	NA	ACTL7A
0.687646	1.42832	3.97472	0.359352	0.719332	NA	ACTL7B
0.895695	-1.17614	3.02096	-0.389327	0.697034	NA	ACTL8
0	NA	NA	NA	NA	NA	ACTL9
46355.3	0.791154	0.210541	3.75773	0.000171464	0.00203618	ACTN1
29.1746	0.401678	0.606722	0.662046	0.507941	0.828493	ACTN2
13.5672	-0.346621	0.769616	-0.450382	0.652435	0.895097	ACTN3
14077.6	1.39847	0.282092	4.95752	7.14003e-07	1.23206e-05	ACTN4
2391.22	-0.00390272	0.1444	-0.027027	0.978438	0.995423	ACTR10
5806.5	0.151794	0.162178	0.93597	0.349289	0.721397	ACTR1A
3673.71	-0.0368835	0.145179	-0.254055	0.799453	0.945862	ACTR1B
17107.2	-0.26091	0.133503	-1.95434	0.050661	0.244752	ACTR2
12498.1	-0.248515	0.125699	-1.97707	0.048034	0.236132	ACTR3
562.675	-0.49263	0.237517	-2.07408	0.0380716	0.199017	ACTR3B
8.72466	-1.13733	0.822558	-1.38268	0.166764	0.509838	ACTR3C
615.205	-0.210984	0.163776	-1.28825	0.197658	0.557824	ACTR5
1033.83	-0.51175	0.170822	-2.99582	0.00273712	0.0243374	ACTR6
1202.37	0.191902	0.146748	1.3077	0.190977	0.546921	ACTR8
0.260354	1.60636	4.04281	0.397338	0.691118	NA	ACTRT1
0	NA	NA	NA	NA	NA	ACTRT2
730.081	-0.551626	0.227402	-2.42578	0.0152755	0.100279	ACTRT3
926.789	-0.194466	0.289492	-0.671749	0.501744	0.824593	ACVR1
1440.94	-0.0578212	0.130324	-0.443672	0.65728	0.896704	ACVR1B
7.51166	0.507246	0.943647	0.537539	0.590896	0.868733	ACVR1C
394.435	0.22103	0.413946	0.533958	0.59337	0.869738	ACVR2A
385.88	-0.362125	0.277618	-1.3044	0.192098	0.548224	ACVR2B
3.52554	5.20622	1.80873	2.87839	0.00399715	0.0333709	ACVRL1
798.444	-0.126425	0.161356	-0.783516	0.433324	0.780218	ACY1
0	NA	NA	NA	NA	NA	ACY3
199.821	-0.113163	0.298099	-0.379616	0.70423	0.916364	ACYP1
477.289	-0.0769377	0.15589	-0.493537	0.621633	0.882814	ACYP2
15.3307	0.00101223	0.600126	0.0016867	0.998654	0.999091	AD000671.6
1374.78	-0.139797	0.210713	-0.663449	0.507043	0.827596	ADA
0	NA	NA	NA	NA	NA	ADAD1
0	NA	NA	NA	NA	NA	ADAD2
514.356	-0.191322	0.193791	-0.98726	0.323515	0.699129	ADAL
3882.64	0.236689	0.150024	1.57767	0.114641	0.41089	ADAM10
316.981	-0.0548479	0.257708	-0.21283	0.83146	0.956132	ADAM11
19.9498	7.0186	1.2652	5.5474	2.89942e-08	5.93843e-07	ADAM12
8829.89	0.702632	0.174545	4.0255	5.68536e-05	0.000739976	ADAM15
3187.74	-0.0381722	0.235471	-0.16211	0.871219	0.966291	ADAM17
6.62258	-0.624252	0.873069	-0.715009	0.474603	0.809792	ADAM18
1030.28	1.31846	0.269633	4.88983	1.00921e-06	1.71009e-05	ADAM19
223.676	-0.892392	0.599189	-1.48933	0.1364	0.455582	ADAM2
1.36084	0.429447	2.25908	0.190098	0.849232	NA	ADAM20
6.12001	4.25846	1.47442	2.88822	0.00387427	0.0325317	ADAM21
795.813	-0.234373	0.25019	-0.936783	0.34887	0.721092	ADAM22
1819.95	-0.343177	0.253282	-1.35492	0.175443	0.524265	ADAM23
5.0544	-1.42616	1.33048	-1.07191	0.283758	0.660218	ADAM28
1.0988	1.42423	3.5124	0.405485	0.685121	NA	ADAM29
0	NA	NA	NA	NA	NA	ADAM30
43.1099	0.0165259	0.449734	0.036746	0.970688	0.992951	ADAM32
1.89444	2.35424	2.17971	1.08007	0.280111	0.656699	ADAM33
7.73659	-1.25479	0.853971	-1.46936	0.141735	0.464995	ADAM7
159.709	-0.266917	0.293593	-0.909138	0.363277	0.731862	ADAM8
4449.89	0.323027	0.20983	1.53947	0.12369	0.429187	ADAM9
0.370627	-1.91989	4.03812	-0.475442	0.634472	NA	ADAMDEC1
756.348	1.44329	0.850487	1.69701	0.0896943	0.35659	ADAMTS1
159.902	1.40184	0.408163	3.43452	0.000593615	0.00628007	ADAMTS10
204.862	4.7744	1.12635	4.23883	2.24691e-05	0.0003139	ADAMTS12
261.255	0.138316	0.324943	0.425664	0.670353	0.902075	ADAMTS13
76.4449	2.75556	0.555586	4.95974	7.05892e-07	1.2207e-05	ADAMTS14
966.639	5.23873	0.39342	13.3159	1.87143e-40	3.15109e-38	ADAMTS15
11.0181	1.52957	1.01885	1.50127	0.133286	0.44961	ADAMTS16
30.0346	1.60014	0.621558	2.5744	0.0100415	0.0717072	ADAMTS17
8.01393	0.316886	1.03158	0.307185	0.758702	0.93593	ADAMTS18
40.1214	-0.327886	0.424515	-0.772379	0.43989	0.784674	ADAMTS19
68.5252	0.0180543	0.402524	0.0448526	0.964225	0.992025	ADAMTS2
2.05023	-0.333602	1.8327	-0.182028	0.855561	0.961445	ADAMTS20
40.9539	-0.701514	0.38509	-1.82169	0.0685018	0.299223	ADAMTS3
7.45152	3.11365	1.14876	2.71044	0.00671936	0.0517267	ADAMTS4
13.0804	0.206506	0.648404	0.318484	0.750118	0.932371	ADAMTS5
4498.23	-0.354775	0.276371	-1.28369	0.199249	0.559816	ADAMTS6
889.501	-0.593522	0.230785	-2.57176	0.0101184	0.0721598	ADAMTS7
48.088	4.23307	0.595834	7.10444	1.20811e-12	3.94385e-11	ADAMTS8
205.931	1.03201	0.297653	3.46718	0.000525954	0.00564641	ADAMTS9
10540.5	0.636109	0.205722	3.09208	0.0019876	0.0184418	ADAMTSL1
0	NA	NA	NA	NA	NA	ADAMTSL2
161.302	0.822984	0.341954	2.40671	0.0160971	0.104335	ADAMTSL3
1475.13	2.1124	0.363559	5.81034	6.23456e-09	1.38704e-07	ADAMTSL4
302.247	1.07131	0.252948	4.2353	2.28247e-05	0.000318313	ADAMTSL5
641.569	-0.024786	0.162925	-0.152131	0.879083	0.968514	ADAP1
439.618	-0.284188	0.201248	-1.41213	0.157913	0.494375	ADAP2
32176.5	0.985798	0.139154	7.08421	1.39838e-12	4.52805e-11	ADAR
842.195	-0.174542	0.181355	-0.96243	0.335833	0.710447	ADARB1
1.12166	2.0604	2.3486	0.877289	0.38033	NA	ADARB2
888.493	-0.0363074	0.148434	-0.244603	0.806764	0.947676	ADAT1
536.642	-0.334075	0.196424	-1.70079	0.0889833	0.354603	ADAT2
156.711	-0.036855	0.252401	-0.146018	0.883908	0.970316	ADAT3
428.392	-0.110922	0.245282	-0.45222	0.65111	0.894567	ADCK1
1741.45	-0.205269	0.236294	-0.868703	0.38501	0.747949	ADCK2
1162.14	-0.261754	0.209368	-1.25021	0.211222	0.577163	ADCK3
2561.78	-0.293522	0.151557	-1.93671	0.0527808	0.250889	ADCK4
264.318	-0.0908839	0.317279	-0.286448	0.774535	0.939436	ADCK5
1141.62	-0.226813	0.30993	-0.73182	0.464278	0.800884	ADCY1
3.81073	1.19912	1.58176	0.758091	0.448397	0.790451	ADCY10
181.698	0.0636234	0.353069	0.180201	0.856995	0.961594	ADCY2
4726.05	-0.145645	0.166471	-0.874895	0.381631	0.745542	ADCY3
3.88361	1.9138	1.62405	1.17841	0.238633	0.611042	ADCY4
97.8003	-0.13594	0.570911	-0.238111	0.811795	0.949994	ADCY5
5953.01	0.0983481	0.165703	0.59352	0.552833	0.854986	ADCY6
688.538	0.305635	0.357434	0.85508	0.392507	0.754813	ADCY7
1.86486	2.37902	1.9857	1.19808	0.230887	0.601706	ADCY8
1774.8	-0.116418	0.227583	-0.511543	0.608971	0.878276	ADCY9
11.4094	-0.683611	0.683534	-1.00011	0.317256	0.693167	ADCYAP1
23.6838	0.155873	0.50797	0.306854	0.758955	0.936117	ADCYAP1R1
7326.63	0.181469	0.150021	1.20962	0.226423	0.595488	ADD1
111.416	0.700455	0.3672	1.90756	0.0564482	0.263019	ADD2
755.466	0.333313	0.201141	1.65711	0.0974969	0.373479	ADD3
1.89406	1.30875	1.98431	0.659549	0.509544	0.828909	ADGB
12.836	-0.134983	0.702556	-0.192131	0.847639	0.959694	ADGRA1
917.497	0.584353	0.301782	1.93634	0.052826	0.250889	ADGRA2
2313.76	-0.557082	0.218998	-2.54377	0.0109662	0.0768777	ADGRA3
2051	-0.117569	0.179789	-0.653928	0.513158	0.831744	ADGRB1
2343.03	0.468052	0.181565	2.57788	0.00994095	0.0710842	ADGRB2
813.741	-0.223363	0.277126	-0.805996	0.420245	0.772634	ADGRB3
8.08132	3.04066	1.23924	2.45364	0.0141419	0.0942953	ADGRD1
0	NA	NA	NA	NA	NA	ADGRD2
0	NA	NA	NA	NA	NA	ADGRE1
18.1046	0.454374	0.60499	0.751045	0.452626	0.793012	ADGRE2
0	NA	NA	NA	NA	NA	ADGRE3
1818.98	0.343943	0.234381	1.46745	0.142253	0.466191	ADGRE5
13.8546	1.00905	0.837389	1.205	0.228204	0.598086	ADGRF1
0.121099	0.870599	4.08047	0.213357	0.831048	NA	ADGRF2
11.4451	-0.0979223	0.916509	-0.106843	0.914914	0.978174	ADGRF3
1.76432	4.23678	2.86015	1.48131	0.138523	0.458571	ADGRF4
324.56	1.7346	0.317224	5.46804	4.55032e-08	9.14409e-07	ADGRF5
189.633	4.14624	0.541285	7.65999	1.85944e-14	7.25455e-13	ADGRG1
13.1606	0.537801	0.653359	0.823133	0.410433	0.765452	ADGRG2
0.278561	1.67229	4.03923	0.414012	0.678866	NA	ADGRG3
5.33227	5.82806	1.72909	3.3706	0.000750054	0.00778577	ADGRG4
1.45874	-2.9825	2.26702	-1.3156	0.188307	NA	ADGRG5
21712.1	-0.21625	0.262479	-0.823875	0.41001	0.765021	ADGRG6
0.12728	-1.05295	4.08047	-0.258047	0.796371	NA	ADGRG7
13681.1	0.0898442	0.151825	0.591763	0.554009	0.855161	ADGRL1
43821.6	-0.438489	0.189297	-2.31641	0.020536	0.125236	ADGRL2
22.8656	-0.30177	0.514268	-0.586796	0.557341	0.855659	ADGRL3
0.674513	-2.17179	4.01394	-0.541063	0.588464	NA	ADGRL4
19.8995	-0.350937	0.767205	-0.457422	0.647368	0.892742	ADGRV1
0	NA	NA	NA	NA	NA	ADH1A
0.34245	-0.0913655	4.08047	-0.0223909	0.982136	NA	ADH1B
0.249661	0.870599	4.08047	0.213357	0.831048	NA	ADH1C
0.139281	0.870599	4.08047	0.213357	0.831048	NA	ADH4
5499.13	0.0313104	0.115605	0.270839	0.786515	0.943193	ADH5
1.97212	3.23407	2.11277	1.53072	0.125838	0.433909	ADH6
0.121099	0.870599	4.08047	0.213357	0.831048	NA	ADH7
19.3821	0.615574	0.790375	0.778838	0.436075	0.782177	ADHFE1
1349.41	0.0256795	0.152385	0.168517	0.866176	0.964522	ADI1
0	NA	NA	NA	NA	NA	ADIG
0.196842	-1.05295	4.08047	-0.258047	0.796371	NA	ADIPOQ
5015.29	-0.053088	0.125354	-0.423505	0.671927	0.902286	ADIPOR1
5475.64	-0.0505378	0.121246	-0.416822	0.676809	0.905177	ADIPOR2
0	NA	NA	NA	NA	NA	ADIRF
1383.62	0.0213315	0.196987	0.108289	0.913767	0.977961	ADK
23.8742	0.95341	0.674185	1.41417	0.157313	0.493835	ADM
1250.09	0.177365	0.288496	0.614792	0.538692	0.84695	ADM2
131.598	-0.211756	0.243959	-0.867997	0.385396	0.748091	ADM5
6128.41	-0.0678331	0.165536	-0.409777	0.681969	0.907251	ADNP
3410.85	-0.0581996	0.317568	-0.183267	0.854589	0.961158	ADNP2
1500.83	-0.0728557	0.182964	-0.398196	0.690486	0.911304	ADO
152.131	4.3261	0.516503	8.37576	5.48696e-17	2.64366e-15	ADORA1
12.3676	0.675873	0.906401	0.745667	0.455869	0.795297	ADORA2A
286.069	0.0660124	0.302309	0.218361	0.827148	0.954553	ADORA2B
1.86116	0.0446075	2.62145	0.0170163	0.986424	0.996963	ADORA3
2966.34	0.0688725	0.142316	0.483941	0.628428	0.885402	ADPGK
3.12387	5.05566	1.91156	2.64478	0.00817442	0.060931	ADPRH
268.525	-0.379821	0.245325	-1.54824	0.121564	0.424677	ADPRHL1
2003.8	0.535196	0.1799	2.97496	0.00293023	0.025768	ADPRHL2
374.051	0.232285	0.272057	0.853811	0.39321	0.755257	ADPRM
5.66351	0.0418574	1.02288	0.0409212	0.967359	0.992235	ADRA1A
53.9944	4.6989	0.776285	6.05305	1.42125e-09	3.44459e-08	ADRA1B
13.0303	2.15236	0.786644	2.73613	0.00621656	0.0486498	ADRA1D
116.159	5.96192	0.637025	9.359	8.04914e-21	4.87705e-19	ADRA2A
3.46824	0.0546895	1.5565	0.0351362	0.971971	0.993206	ADRA2B
582.057	0.0174083	0.261477	0.0665768	0.946919	0.987863	ADRA2C
3.23742	0.36222	1.2895	0.2809	0.778787	0.941253	ADRB1
236.67	6.22891	0.67229	9.26522	1.94671e-20	1.16627e-18	ADRB2
0	NA	NA	NA	NA	NA	ADRB3
2810.33	-0.0172807	0.166438	-0.103826	0.917307	0.979097	ADRBK1
1205.35	-0.366673	0.188744	-1.9427	0.0520525	0.248972	ADRBK2
5924.99	-0.199539	0.25076	-0.795738	0.426184	0.775568	ADRM1
3738.6	-0.174749	0.142225	-1.22868	0.219194	0.587238	ADSL
2279.54	-0.127044	0.150663	-0.843232	0.399099	0.759004	ADSS
267.033	-0.738797	0.277472	-2.6626	0.00775405	0.0583414	ADSSL1
1.24924	2.35038	2.63504	0.891971	0.372409	NA	ADTRP
2.50586	0.170369	1.71337	0.0994353	0.920793	0.980125	AEBP1
1173.21	0.0308522	0.137874	0.22377	0.822936	0.95255	AEBP2
7713.2	-0.147333	0.270752	-0.544162	0.58633	0.866255	AEN
19410.2	0.257218	0.193281	1.3308	0.183255	0.535645	AES
392.447	0.0109698	0.228154	0.0480805	0.961652	0.991338	AF011889.5
2.01304	-0.0405899	1.77194	-0.0229071	0.981724	0.996398	AF111168.2
18.2548	0.0722935	0.541266	0.133564	0.893747	0.972567	AF131216.1
2.14252	0.821044	1.8267	0.449467	0.653095	0.895106	AF165138.7
1271.82	0.533958	0.263396	2.02721	0.0426414	0.217158	AFAP1
1.94116	2.129	2.34042	0.909663	0.363	0.731764	AFAP1L1
770.314	6.37926	0.370682	17.2095	2.25318e-66	9.62149e-64	AFAP1L2
1113.97	1.3067	0.266296	4.90694	9.25078e-07	1.57421e-05	AFF1
20.2014	0.186832	0.55407	0.337199	0.735967	0.928494	AFF2
11.3501	1.48257	0.972806	1.52401	0.127506	0.437033	AFF3
8836.91	-0.019629	0.256243	-0.0766031	0.938939	0.9855	AFF4
7197.12	-0.118505	0.140421	-0.843929	0.398709	0.758931	AFG3L2
207.915	-0.489336	0.450873	-1.08531	0.277786	0.654702	AFM
659.273	-0.251533	0.185085	-1.35901	0.174144	0.522529	AFMID
437.854	-0.122207	0.347943	-0.351226	0.725418	0.924679	AFP
2871.62	-0.0543653	0.175208	-0.31029	0.75634	0.93498	AFTPH
449.307	0.101253	0.172422	0.587236	0.557045	0.855659	AGA
1427.91	-0.375652	0.203843	-1.84286	0.06535	0.29005	AGAP1
27.5579	0.431959	0.467293	0.924384	0.355286	0.725819	AGAP14P
6977.63	-0.266562	0.302849	-0.880182	0.378761	0.743221	AGAP2
2944.1	-0.0536503	0.151001	-0.355299	0.722366	0.924126	AGAP3
346.957	0.261738	0.173062	1.51239	0.130433	0.443164	AGAP4
79.256	0.417276	0.436275	0.956451	0.338844	0.712897	AGAP5
639.766	0.0889544	0.177932	0.499936	0.61712	0.881144	AGAP6
146.903	0.405567	0.272447	1.48861	0.136591	0.455582	AGAP9
2.31117	1.67207	1.92066	0.870571	0.383988	0.747054	AGBL1
115.689	0.573237	0.433291	1.32298	0.185841	0.539198	AGBL2
56.0171	-0.198376	0.379493	-0.522741	0.601154	0.873868	AGBL3
2.60655	1.33621	1.61604	0.826843	0.408326	0.76438	AGBL4
1741.34	-0.304509	0.210019	-1.44991	0.147083	0.47615	AGBL5
139.657	1.26365	0.323653	3.90435	9.4478e-05	0.0011835	AGER
2786.44	0.117399	0.180319	0.651064	0.515005	0.833587	AGFG1
2431.52	0.028591	0.172794	0.165463	0.86858	0.965595	AGFG2
2470.92	-0.117583	0.14655	-0.802346	0.422353	0.773398	AGGF1
1482.95	0.10834	0.133699	0.810326	0.417753	0.771458	AGK
985.765	-0.327689	0.261804	-1.25166	0.210695	0.576215	AGL
1.79283	-1.8439	2.03041	-0.908142	0.363803	0.732381	AGMAT
140.674	-0.418037	0.332284	-1.25807	0.208367	0.573573	AGMO
3525.12	-0.339227	0.165056	-2.05522	0.0398579	0.206076	AGO1
3169.86	-0.131682	0.177631	-0.74132	0.4585	0.796602	AGO2
976.723	-0.357833	0.347058	-1.03105	0.302519	0.679825	AGO3
1046.41	0.227813	0.16949	1.34411	0.178912	0.530076	AGO4
5661.92	-0.112302	0.177492	-0.632716	0.526919	0.840291	AGPAT1
1644.1	-0.103017	0.126857	-0.812069	0.416752	0.770714	AGPAT2
3052.78	0.118636	0.202895	0.584718	0.558738	0.855659	AGPAT3
320.659	-0.173631	0.319084	-0.544154	0.586336	0.866255	AGPAT4
1586.36	-0.640945	0.158949	-4.03239	5.52121e-05	0.000720369	AGPAT5
22.6787	-0.38683	0.72776	-0.531534	0.595049	0.870452	AGPS
6.85053	-0.4141	1.01695	-0.4072	0.683861	0.90803	AGR2
0.12728	-1.05295	4.08047	-0.258047	0.796371	NA	AGR3
37114.2	1.43008	0.190643	7.50136	6.31612e-14	2.31726e-12	AGRN
0.324335	-1.87066	4.04716	-0.462215	0.643927	NA	AGRP
0.249661	0.870599	4.08047	0.213357	0.831048	NA	AGT
1204.54	-0.245023	0.21212	-1.15512	0.248043	0.62258	AGTPBP1
44.7541	0.223859	0.356678	0.627622	0.530252	0.841967	AGTR1
1.02058	-0.171431	2.97354	-0.057652	0.954026	NA	AGTR2
1075.76	0.186147	0.190703	0.976113	0.329009	0.703962	AGTRAP
0.121099	0.870599	4.08047	0.213357	0.831048	NA	AGXT
0	NA	NA	NA	NA	NA	AGXT2
5577.95	-0.126494	0.147926	-0.855114	0.392488	0.754813	AHCTF1
15809.3	-0.491157	0.131416	-3.73742	0.000185917	0.00219155	AHCY
4996.87	0.203568	0.131706	1.54563	0.122195	0.425893	AHCYL1
1125.88	-0.301234	0.186506	-1.61515	0.106279	0.392528	AHCYL2
1454.71	0.695435	0.204391	3.40248	0.000667775	0.00699982	AHDC1
549.215	-0.198107	0.192084	-1.03135	0.302374	0.679705	AHI1
21303.9	1.28535	0.291517	4.40917	1.03767e-05	0.000152841	AHNAK
576.994	0.296216	0.311119	0.952101	0.341046	0.714334	AHNAK2
78.4358	2.46817	0.741139	3.33023	0.000867735	0.00886353	AHR
126.268	0.133017	0.248422	0.535449	0.592339	0.869161	AHRR
7323.78	-0.0762668	0.1975	-0.386161	0.699377	0.914467	AHSA1
4406.18	0.0131348	0.219165	0.0599311	0.95221	0.989305	AHSA2
1.45372	2.10436	2.56045	0.821872	0.41115	NA	AHSG
0	NA	NA	NA	NA	NA	AHSP
2.19623	3.55002	1.75729	2.02016	0.0433663	0.219154	AICDA
2363.1	-0.0797013	0.1463	-0.544778	0.585906	0.866188	AIDA
0.196842	-1.05295	4.08047	-0.258047	0.796371	NA	AIF1
662.345	0.46175	0.184022	2.50922	0.0120999	0.083152	AIF1L
5104.85	-0.121711	0.144493	-0.842333	0.399602	0.759238	AIFM1
98.4017	-0.294842	0.424319	-0.694859	0.487144	0.816804	AIFM2
9.86503	0.372021	0.766448	0.485383	0.627404	0.885338	AIFM3
1695.94	-0.283314	0.13987	-2.02556	0.0428104	0.217584	AIG1
29.5813	3.54844	0.742512	4.77897	1.76194e-06	2.90258e-05	AIM1
117.104	2.99046	0.439018	6.81171	9.64443e-12	2.89442e-10	AIM1L
1.10866	1.31373	2.31597	0.56725	0.570545	NA	AIM2
2619.72	0.068706	0.178902	0.384043	0.700947	0.915144	AIMP1
1093.13	0.12005	0.170634	0.703556	0.481709	0.814133	AIMP2
2182.24	-0.283126	0.212973	-1.3294	0.183716	0.536557	AIP
0.49661	0.0427942	4.0271	0.0106266	0.991521	NA	AIPL1
0.203157	-1.05295	4.08047	-0.258047	0.796371	NA	AIRE
0.249661	0.870599	4.08047	0.213357	0.831048	NA	AJ239318.1
1265.46	6.87463	0.40575	16.943	2.16704e-64	7.87819e-62	AJAP1
1795.79	0.642225	0.201828	3.18204	0.00146241	0.0141516	AJUBA
948.744	0.146766	0.156503	0.937784	0.348355	0.720647	AK1
7508.28	-0.0254083	0.137479	-0.184815	0.853374	0.960671	AK2
3140.39	-0.00831074	0.187168	-0.0444026	0.964583	0.992052	AK3
2771.79	-0.0535889	0.184055	-0.291157	0.770931	0.93909	AK4
3.1788	0.715496	1.20992	0.591357	0.554281	0.855161	AK5
3199.6	-0.146826	0.161071	-0.911564	0.361998	0.730481	AK6
62.3286	-0.0033643	0.39748	-0.00846406	0.993247	0.998283	AK7
24.0265	-0.43823	0.549957	-0.796844	0.425542	0.775369	AK8
124.554	0.282036	0.262687	1.07366	0.282977	0.659382	AK9
2266.52	-0.224124	0.234884	-0.954192	0.339986	0.713797	AKAP1
1158.61	0.160734	0.141489	1.13601	0.25595	0.631168	AKAP10
2124.42	-0.165249	0.119305	-1.38511	0.16602	0.508748	AKAP11
5545.36	0.233502	0.220686	1.05807	0.290022	0.667547	AKAP12
2974.6	0.888323	0.253843	3.49949	0.000466144	0.00506896	AKAP13
0.995986	-0.883733	2.4795	-0.356416	0.721529	NA	AKAP14
1891.51	0.0583335	0.167423	0.348419	0.727525	0.9253	AKAP17A
1055.02	4.449	0.929677	4.78554	1.7053e-06	2.81506e-05	AKAP2
13.0809	-0.100397	0.893917	-0.112312	0.910576	0.976507	AKAP3
0.260368	1.6064	4.04281	0.397348	0.691111	NA	AKAP4
246.862	-0.0674232	0.371211	-0.18163	0.855873	0.961445	AKAP5
8831.79	-0.0532843	0.188802	-0.282223	0.777773	0.940737	AKAP6
789.387	-0.431695	0.235801	-1.83076	0.0671363	0.295193	AKAP7
1794.9	0.0772813	0.142934	0.54068	0.588728	0.867727	AKAP8
3463.19	0.176682	0.191206	0.924042	0.355464	0.725997	AKAP8L
2435.51	0.0692059	0.156311	0.442746	0.657949	0.897234	AKAP9
3636.04	-0.186561	0.220507	-0.846051	0.397524	0.758244	AKIP1
8167.33	-0.249171	0.246458	-1.01101	0.312012	0.688786	AKIRIN1
1265.1	0.161027	0.213178	0.755362	0.450032	0.791415	AKIRIN2
462.893	0.342093	0.310956	1.10013	0.271274	0.648141	AKNA
0.203157	-1.05295	4.08047	-0.258047	0.796371	NA	AKNAD1
3731.43	-0.289749	0.149072	-1.94369	0.0519333	0.248646	AKR1A1
6.12596	0.294025	1.27935	0.229823	0.818229	0.951745	AKR1B1
5.60444	1.74615	1.38521	1.26057	0.207465	0.57211	AKR1B10
4.81872	-1.12704	1.11724	-1.00876	0.313087	0.689472	AKR1B15
84.1858	1.90831	0.401643	4.75125	2.02163e-06	3.2998e-05	AKR1C1
77.2619	3.86524	0.548365	7.04866	1.80652e-12	5.77942e-11	AKR1C2
409.749	4.54042	0.430253	10.5529	4.92465e-26	3.86151e-24	AKR1C3
0	NA	NA	NA	NA	NA	AKR1C4
0.500973	2.43296	3.99329	0.609262	0.542351	NA	AKR1D1
224.761	-0.0642753	0.251455	-0.255614	0.798249	0.945596	AKR1E2
2273.64	-0.257713	0.133035	-1.93718	0.052723	0.2508	AKR7A2
23.4537	0.182449	0.51709	0.352838	0.72421	0.924538	AKR7A3
7076.97	0.221608	0.14647	1.51299	0.130281	0.443102	AKT1
5845.45	-0.239579	0.149139	-1.60642	0.108182	0.39644	AKT1S1
7299.28	-0.0513745	0.156982	-0.327264	0.743468	0.930433	AKT2
3031.89	0.0165479	0.210627	0.0785649	0.937379	0.9855	AKT3
1518.54	-0.307746	0.148686	-2.06978	0.0384732	0.200658	AKTIP
0.382384	2.04973	4.01891	0.510021	0.610037	NA	AL008723.1
7.30418	-0.576635	0.890524	-0.647524	0.517293	0.834471	AL021546.6
0.387628	0.651328	3.80204	0.17131	0.86398	NA	AL022578.1
6.89936	-0.0818669	0.886089	-0.0923913	0.926387	0.981907	AL023806.1
0.377938	-0.0834383	4.08047	-0.0204482	0.983686	NA	AL023875.1
0.249661	0.870599	4.08047	0.213357	0.831048	NA	AL049794.1
0	NA	NA	NA	NA	NA	AL049872.1
0	NA	NA	NA	NA	NA	AL109927.1
0.373734	-0.65896	4.06182	-0.162233	0.871123	NA	AL133335.1
0	NA	NA	NA	NA	NA	AL133475.1
1.87887	-0.808788	2.13486	-0.378848	0.7048	0.916586	AL135745.1
0	NA	NA	NA	NA	NA	AL135842.1
6.9392	-0.464152	1.16561	-0.398204	0.69048	0.911304	AL136097.1
0	NA	NA	NA	NA	NA	AL137164.1
0.855774	1.8764	2.94365	0.63744	0.523838	NA	AL137860.1
0	NA	NA	NA	NA	NA	AL138706.2
0	NA	NA	NA	NA	NA	AL138751.1
0	NA	NA	NA	NA	NA	AL139333.1
0	NA	NA	NA	NA	NA	AL158839.1
0	NA	NA	NA	NA	NA	AL162426.1
267.01	-0.00877578	0.268188	-0.0327225	0.973896	0.99384	AL354822.1
0	NA	NA	NA	NA	NA	AL354828.1
0	NA	NA	NA	NA	NA	AL354828.2
0	NA	NA	NA	NA	NA	AL356131.3
0	NA	NA	NA	NA	NA	AL356135.1
0.502738	2.43765	3.99299	0.610481	0.541544	NA	AL356289.1
67.5382	-0.331564	0.304398	-1.08925	0.276045	0.652714	AL356585.2
67.5382	-0.331564	0.304398	-1.08925	0.276045	0.652714	AL356585.3
0	NA	NA	NA	NA	NA	AL357140.1
17.8365	0.104303	0.70207	0.148564	0.881897	0.969808	AL358852.1
0	NA	NA	NA	NA	NA	AL360294.1
30.404	0.0369746	0.483725	0.0764373	0.939071	0.9855	AL365181.2
0.203157	-1.05295	4.08047	-0.258047	0.796371	NA	AL365202.1
0	NA	NA	NA	NA	NA	AL365273.1
0	NA	NA	NA	NA	NA	AL445183.1
0	NA	NA	NA	NA	NA	AL513412.1
217.479	-0.313359	0.319379	-0.981149	0.326519	0.701762	AL513523.1
217.479	-0.313359	0.319379	-0.981149	0.326519	0.701762	AL513523.2
2174.93	0.413542	0.152533	2.71116	0.00670477	0.0516616	AL589743.1
1.48751	1.11906	1.90051	0.588819	0.555983	NA	AL590235.1
0	NA	NA	NA	NA	NA	AL591806.1
41.1511	0.135195	0.409813	0.329894	0.74148	0.929815	AL592183.1
0	NA	NA	NA	NA	NA	AL596220.1
0	NA	NA	NA	NA	NA	AL645728.1
0	NA	NA	NA	NA	NA	AL645922.1
0	NA	NA	NA	NA	NA	AL662852.1
6.55955	-1.0133	1.03211	-0.981776	0.32621	0.701762	AL928654.7
0	NA	NA	NA	NA	NA	AL929561.1
1578.89	-0.0472334	0.15914	-0.296804	0.766616	0.938053	ALAD
3887.39	0.247959	0.137276	1.80628	0.070874	0.306571	ALAS1
7.90756	3.91413	1.19387	3.27852	0.00104355	0.010459	ALAS2
55.8559	-0.114422	0.521336	-0.219478	0.826278	0.954375	ALB
1500.96	-0.0373305	0.192351	-0.194075	0.846117	0.958941	ALCAM
933.907	-0.0286618	0.260591	-0.109988	0.912419	0.977566	ALDH16A1
11710.5	-0.212354	0.230417	-0.92161	0.356732	0.726925	ALDH18A1
4636.13	-0.07937	0.181455	-0.437409	0.661815	0.899325	ALDH1A1
4.75867	3.29307	1.38912	2.37063	0.0177579	0.112142	ALDH1A2
63.7572	0.323933	0.514388	0.629744	0.528862	0.841591	ALDH1A3
4374.42	0.276505	0.199795	1.38394	0.166376	0.509434	ALDH1B1
2.46485	4.63314	2.27577	2.03586	0.0417645	0.213918	ALDH1L1
194.608	0.592768	0.367092	1.61477	0.106361	0.392739	ALDH1L2
23.7912	-0.479516	0.799868	-0.599493	0.548844	0.852112	ALDH2
0	NA	NA	NA	NA	NA	ALDH3A1
592.068	0.259292	0.281495	0.921127	0.356984	0.726925	ALDH3A2
155.903	1.83299	0.350012	5.23694	1.63262e-07	3.09423e-06	ALDH3B1
0.763287	3.03274	3.67502	0.825231	0.409241	NA	ALDH3B2
2723.53	0.377735	0.237013	1.59373	0.110996	0.402149	ALDH4A1
76.8566	0.72206	0.513075	1.40732	0.159333	0.496664	ALDH5A1
894.08	-0.259315	0.251822	-1.02976	0.303125	0.679919	ALDH6A1
2573.64	0.0196837	0.165309	0.119072	0.905219	0.975336	ALDH7A1
13.1306	1.97629	0.762198	2.59288	0.00951773	0.0687207	ALDH8A1
3408.77	-0.112689	0.116474	-0.967505	0.333292	0.708153	ALDH9A1
40629.1	-0.119739	0.123179	-0.972071	0.331015	0.705858	ALDOA
0	NA	NA	NA	NA	NA	ALDOB
9.60644	1.34198	0.895047	1.49934	0.133785	0.450342	ALDOC
1417.36	-0.129232	0.153851	-0.839983	0.400918	0.759981	ALG1
137.432	-0.0651337	0.24603	-0.264739	0.791211	0.944962	ALG10
393.382	-0.139213	0.235941	-0.590034	0.555168	0.855235	ALG10B
754.934	0.0534554	0.200949	0.266016	0.790227	0.944855	ALG11
1514.31	-0.181534	0.195318	-0.929429	0.352667	0.723359	ALG12
2954.63	-0.284161	0.214597	-1.32416	0.18545	0.53848	ALG13
287.134	0.118557	0.223824	0.52969	0.596327	0.871389	ALG14
3.99332	-0.100868	1.34074	-0.0752332	0.940029	0.98569	ALG1L
0.904522	3.27581	3.45883	0.947085	0.343595	NA	ALG1L2
2393.37	0.0795501	0.129159	0.61591	0.537954	0.846821	ALG2
1916.04	-0.127706	0.148861	-0.857886	0.390955	0.753823	ALG3
1316.56	-0.105642	0.166749	-0.633537	0.526383	0.839986	ALG5
535.1	-0.219754	0.175141	-1.25473	0.209577	0.574631	ALG6
1429.51	-0.306908	0.207347	-1.48017	0.138829	0.459061	ALG8
695.967	0.090076	0.175496	0.513264	0.607766	0.877429	ALG9
36.6646	0.662944	0.585779	1.13173	0.257748	0.632813	ALK
528.429	0.169086	0.20495	0.825012	0.409365	0.764689	ALKBH1
1374.5	-0.270733	0.142665	-1.89769	0.057737	0.266974	ALKBH2
692.939	-0.04425	0.265731	-0.166522	0.867746	0.965531	ALKBH3
783.134	-0.030854	0.235154	-0.131208	0.895611	0.972611	ALKBH4
5028.19	-0.0796086	0.153673	-0.518039	0.604431	0.875452	ALKBH5
710.681	0.0140719	0.17737	0.0793362	0.936765	0.9855	ALKBH6
990.397	-0.327919	0.170587	-1.9223	0.0545679	0.2565	ALKBH7
434.131	-0.287958	0.302407	-0.952221	0.340985	0.714334	ALKBH8
0	NA	NA	NA	NA	NA	ALLC
2339.53	-0.187716	0.175648	-1.06871	0.285202	0.662133	ALMS1
18.1937	-0.0738201	0.611446	-0.12073	0.903905	0.975171	ALOX12
47.4357	-0.870261	0.366598	-2.37388	0.0176022	0.111403	ALOX12B
3.70079	-0.266097	1.69071	-0.157388	0.874939	0.967645	ALOX15
0.31789	-0.0905374	4.08047	-0.022188	0.982298	NA	ALOX15B
0	NA	NA	NA	NA	NA	ALOX5
1.00625	3.43041	3.37236	1.01721	0.309052	NA	ALOX5AP
15.5424	0.253545	0.828495	0.306031	0.759581	0.936203	ALOXE3
0	NA	NA	NA	NA	NA	ALPI
39.1264	1.08925	0.712999	1.5277	0.126587	0.435085	ALPK1
18381.8	0.118403	0.26488	0.447005	0.654871	0.895556	ALPK2
49.9695	1.4793	0.568144	2.60374	0.00922121	0.0670239	ALPK3
74.6217	2.73328	0.397816	6.87072	6.38808e-12	1.9613e-10	ALPL
7.32821	6.27592	1.61316	3.89046	0.000100055	0.00124648	ALPP
0.709165	2.87435	3.10434	0.925912	0.354492	NA	ALPPL2
2370.25	0.160391	0.207797	0.771862	0.440196	0.784674	ALS2
344.262	2.42505	0.424784	5.7089	1.1371e-08	2.45135e-07	ALS2CL
0.890447	-0.412182	2.96336	-0.139093	0.889377	NA	ALS2CR11
3.57715	0.318052	1.28201	0.248088	0.804066	0.947047	ALS2CR12
223.592	-0.296316	0.338335	-0.875808	0.381134	0.745035	ALX1
0.660312	-0.380689	3.98138	-0.0956172	0.923825	NA	ALX3
1.5305	-3.00201	2.6343	-1.13958	0.254459	NA	ALX4
3754.46	-0.322593	0.169675	-1.90124	0.0572702	0.265784	ALYREF
1196.87	0.00191421	0.139108	0.0137606	0.989021	0.997376	AMACR
0.885514	-1.90613	3.72284	-0.51201	0.608644	NA	AMBN
0.363297	1.98454	4.02398	0.493177	0.621888	NA	AMBP
2265.94	0.0573792	0.148117	0.387392	0.698466	0.913831	AMBRA1
3254.8	0.240208	0.261156	0.919786	0.357684	0.727064	AMD1
872.276	-0.344216	0.320515	-1.07395	0.282846	0.659382	AMDHD1
1662.73	-0.181671	0.200053	-0.908111	0.36382	0.732381	AMDHD2
1.68344	-1.89161	2.20652	-0.857281	0.39129	NA	AMELX
0.249661	0.870599	4.08047	0.213357	0.831048	NA	AMELY
415.24	0.270082	0.18241	1.48063	0.138705	0.458887	AMER1
0.727825	-1.29926	3.95732	-0.328317	0.742672	NA	AMER2
0	NA	NA	NA	NA	NA	AMER3
5144.56	-0.0819853	0.123144	-0.665766	0.505561	0.826931	AMFR
352.117	0.457701	0.275473	1.66151	0.0966114	0.371792	AMH
0	NA	NA	NA	NA	NA	AMHR2
94.6089	0.56272	0.399938	1.40702	0.159421	0.496806	AMIGO1
490.108	-0.0563019	0.166802	-0.337537	0.735712	0.928323	AMIGO2
23.2946	-1.59385	2.40808	-0.661875	0.508052	0.828504	AMIGO3
402.468	-0.214304	0.164068	-1.30619	0.191488	0.547657	AMMECR1
2825.15	0.0327944	0.21446	0.152916	0.878465	0.968315	AMMECR1L
12.0866	0.578734	0.730245	0.79252	0.428057	0.777089	AMN
518.758	-0.494324	0.170326	-2.90223	0.00370518	0.0314745	AMN1
382.788	-0.0683572	0.260502	-0.262405	0.793009	0.944975	AMOT
474.373	5.51212	0.449358	12.2667	1.36764e-34	1.75014e-32	AMOTL1
60.0397	5.34652	0.661557	8.08173	6.3857e-16	2.84528e-14	AMOTL2
0	NA	NA	NA	NA	NA	AMPD1
5954.44	-0.0683851	0.115335	-0.592925	0.553231	0.855161	AMPD2
14.0521	1.12801	0.821497	1.37311	0.169718	0.515242	AMPD3
155.442	1.45098	0.309793	4.6837	2.81744e-06	4.49778e-05	AMPH
209.775	0.511053	0.226504	2.25627	0.0240539	0.140785	AMT
0	NA	NA	NA	NA	NA	AMTN
0.196842	-1.05295	4.08047	-0.258047	0.796371	NA	AMY1A
1.17935	-3.09625	2.71573	-1.14012	0.254238	NA	AMY1B
0	NA	NA	NA	NA	NA	AMY1C
0.242198	1.53756	4.04672	0.379952	0.703981	NA	AMY2A
113.806	0.260538	0.478823	0.544121	0.586358	0.866255	AMY2B
1.74617	1.25893	1.97317	0.638027	0.523456	0.83774	AMZ1
4951.88	-0.351513	0.152901	-2.29896	0.0215073	0.129432	AMZ2
3201.25	-0.048819	0.219281	-0.222632	0.823822	0.952915	ANAPC1
487.906	-0.19475	0.196301	-0.992099	0.321149	0.69676	ANAPC10
1962.61	-0.119106	0.185246	-0.642964	0.520247	0.83621	ANAPC11
1845.88	0.876869	0.277893	3.15542	0.00160268	0.0153603	ANAPC13
1519.19	-0.533146	0.23653	-2.25403	0.0241943	0.14118	ANAPC15
2562.19	-0.0958498	0.171513	-0.558849	0.576265	0.863105	ANAPC16
2123.35	0.0600613	0.145047	0.414081	0.678815	0.906014	ANAPC2
961.015	0.0103216	0.142217	0.0725766	0.942143	0.986291	ANAPC4
5777.26	-0.196458	0.124374	-1.57957	0.114204	0.40992	ANAPC5
3476.54	-0.0457028	0.157083	-0.290947	0.771092	0.93909	ANAPC7
1547.95	-0.516509	0.193744	-2.66593	0.0076776	0.0578206	ANG
2503.5	0.00522043	0.180053	0.0289939	0.976869	0.99504	ANGEL1
1076.74	-0.111655	0.160425	-0.695997	0.486431	0.816337	ANGEL2
6672.86	-0.224197	0.270886	-0.827646	0.407871	0.76397	ANGPT1
4.29399	1.25586	1.10676	1.13472	0.256495	0.631583	ANGPT2
0.984266	2.11887	2.82002	0.751368	0.452431	NA	ANGPT4
8.32486	-2.7149	1.11666	-2.43126	0.0150463	0.0991677	ANGPTL1
0.688829	-1.44411	3.17231	-0.455223	0.648949	NA	ANGPTL2
3.64057	-1.65723	1.8053	-0.917978	0.35863	0.727539	ANGPTL3
110.754	3.35333	0.596749	5.61933	1.91704e-08	4.0085e-07	ANGPTL4
0.805941	-0.779078	2.6182	-0.297562	0.766037	NA	ANGPTL5
7.22879	0.388803	0.852103	0.456287	0.648184	0.892976	ANGPTL6
2.75518	1.67225	1.50549	1.11077	0.266669	0.643131	ANGPTL7
2.1959	-0.467167	1.98221	-0.235679	0.813681	0.950901	ANGPTL8
0.254561	-1.63998	4.06208	-0.40373	0.686411	NA	ANHX
110.103	2.00666	0.517843	3.87504	0.000106606	0.00131987	ANK1
2152.34	-0.122688	0.138571	-0.885381	0.375951	0.740987	ANK2
33.0378	-0.227746	0.667308	-0.341291	0.732884	0.92725	ANK3
72.3713	-0.543644	0.429474	-1.26584	0.205571	0.568917	ANKAR
417.87	-0.207427	0.161326	-1.28577	0.198525	0.558738	ANKDD1A
3.14059	0.320639	1.28924	0.248704	0.80359	0.946986	ANKDD1B
1.03452	-0.272453	2.85053	-0.0955798	0.923854	NA	ANKEF1
9.08663	-0.0264438	0.812835	-0.0325328	0.974047	0.993867	ANKFN1
4293.27	0.592576	0.164479	3.60274	0.000314876	0.00354202	ANKFY1
1997.54	-0.0663855	0.170341	-0.389722	0.696742	0.913158	ANKH
6080.17	-0.034129	0.259262	-0.131639	0.89527	0.972611	ANKHD1
4879.47	0.0470078	0.212044	0.221689	0.824556	0.95335	ANKHD1-EIF4EBP3
2898.1	0.286244	0.191184	1.49722	0.134336	0.451153	ANKIB1
4.40684	1.66733	1.75896	0.947905	0.343178	0.716007	ANKK1
33.779	0.607588	0.521238	1.16566	0.243751	0.617816	ANKLE1
4643.81	0.344334	0.188426	1.82743	0.0676353	0.296275	ANKLE2
449.737	-0.182246	0.296755	-0.614128	0.53913	0.84695	ANKMY1
956.715	-0.0245992	0.191601	-0.128388	0.897842	0.97322	ANKMY2
593.405	0.027389	0.254918	0.107442	0.914438	0.978174	ANKRA2
12673.7	3.87767	0.790587	4.90479	9.35256e-07	1.58984e-05	ANKRD1
1536.83	0.794703	0.216717	3.667	0.000245411	0.00283232	ANKRD10
8936.89	0.156973	0.15764	0.995768	0.319363	0.694943	ANKRD11
1115.37	-0.0494977	0.360489	-0.137307	0.890788	0.971913	ANKRD12
961.258	0.32385	0.25638	1.26316	0.206531	0.570655	ANKRD13A
2564.58	0.121296	0.18049	0.672039	0.501559	0.824593	ANKRD13B
1422.91	-0.0734253	0.171281	-0.428683	0.668154	0.901265	ANKRD13C
1254.58	-0.0803089	0.180637	-0.444588	0.656618	0.896106	ANKRD13D
627.923	-0.3523	0.181102	-1.94531	0.0517372	0.248004	ANKRD16
9479.71	-0.0220942	0.177369	-0.124566	0.900867	0.973696	ANKRD17
361.025	0.382238	0.327047	1.16876	0.242502	0.616213	ANKRD18A
20.4523	0.309392	0.600812	0.514957	0.606583	0.876842	ANKRD18B
16.3483	6.34749	1.48866	4.26389	2.00903e-05	0.000282642	ANKRD2
16.7675	1.8083	0.703887	2.56903	0.0101985	0.0725691	ANKRD20A1
3.39474	0.818539	1.74685	0.468581	0.639369	0.890455	ANKRD20A2
8.19899	-0.358523	1.18494	-0.302566	0.762221	0.936917	ANKRD20A3
0.786644	0.231431	3.78142	0.0612022	0.951198	NA	ANKRD20A4
36.7418	-0.431975	1.06571	-0.405339	0.685228	0.908639	ANKRD22
206.452	-0.265161	0.250702	-1.05768	0.290203	0.667547	ANKRD23
588.967	0.0168822	0.218815	0.0771529	0.938502	0.9855	ANKRD24
552.632	-0.201899	0.226097	-0.892976	0.37187	0.738255	ANKRD26
1945.93	-0.0697578	0.122794	-0.568087	0.569976	0.859802	ANKRD27
1689.62	-0.242386	0.164524	-1.47326	0.140681	0.463413	ANKRD28
9.00586	-0.0588009	1.15467	-0.0509243	0.959386	0.990942	ANKRD29
0	NA	NA	NA	NA	NA	ANKRD30A
3.92198	1.03261	1.38703	0.744477	0.456588	0.795331	ANKRD30B
0	NA	NA	NA	NA	NA	ANKRD30BL
14.168	-0.147505	0.635848	-0.231982	0.816552	0.951478	ANKRD31
0.834431	1.19582	3.13434	0.381521	0.702816	NA	ANKRD33
2116.37	1.88952	0.803325	2.35213	0.0186665	0.1165	ANKRD33B
114.302	-0.278752	0.305839	-0.911434	0.362067	0.730528	ANKRD34A
64.1056	-0.208752	0.318432	-0.65556	0.512107	0.830966	ANKRD34B
12.6714	7.07154	1.40281	5.04097	4.63188e-07	8.24155e-06	ANKRD34C
0.745118	-0.0675808	3.85921	-0.0175115	0.986029	NA	ANKRD35
327.258	-0.0346855	0.227085	-0.152742	0.878602	0.968315	ANKRD36
268.46	0.436721	0.345163	1.26526	0.205777	0.56923	ANKRD36B
192.871	0.115552	0.265375	0.435429	0.663251	0.899391	ANKRD36C
137.598	0.0535771	0.224556	0.238591	0.811423	0.949994	ANKRD37
834.173	-0.435446	0.158819	-2.74177	0.00611094	0.0479875	ANKRD39
2164.91	0.169672	0.150828	1.12493	0.260617	0.63617	ANKRD40
844.055	0.0118657	0.150414	0.0788873	0.937122	0.9855	ANKRD42
182.775	-0.00953404	0.248473	-0.0383705	0.969392	0.9926	ANKRD44
14.0353	6.2176	1.36185	4.56555	4.98185e-06	7.73686e-05	ANKRD45
455.309	0.110393	0.224106	0.492593	0.6223	0.882868	ANKRD46
593.305	-0.128059	0.21688	-0.590461	0.554882	0.855161	ANKRD49
1418.92	-0.326581	0.349669	-0.933972	0.350318	0.721846	ANKRD50
7392.53	0.31889	0.184423	1.72912	0.0837874	0.340774	ANKRD52
2.20114	-1.25496	1.5343	-0.81794	0.413391	0.767953	ANKRD53
2027.48	-0.0806598	0.12203	-0.660983	0.508623	0.828591	ANKRD54
0	NA	NA	NA	NA	NA	ANKRD55
476.931	-0.292945	0.170079	-1.72241	0.0849951	0.344111	ANKRD6
0	NA	NA	NA	NA	NA	ANKRD60
8.46972	-0.24209	0.759537	-0.318733	0.749929	0.932371	ANKRD61
0	NA	NA	NA	NA	NA	ANKRD62
0	NA	NA	NA	NA	NA	ANKRD63
12.6985	-0.325552	0.744105	-0.437509	0.661742	0.899325	ANKRD65
0	NA	NA	NA	NA	NA	ANKRD66
0.121099	0.870599	4.08047	0.213357	0.831048	NA	ANKRD7
1365.76	0.13004	0.276877	0.469667	0.638593	0.890455	ANKRD9
1226.52	0.377414	0.233188	1.61849	0.105556	0.391213	ANKS1A
178.475	-0.34793	0.232047	-1.4994	0.13377	0.450342	ANKS1B
906.917	-0.254536	0.183474	-1.38731	0.165347	0.507461	ANKS3
0.12728	-1.05295	4.08047	-0.258047	0.796371	NA	ANKS4B
2986.47	-0.216127	0.145533	-1.48507	0.137525	0.457142	ANKS6
1.31172	3.74264	2.63802	1.41873	0.155978	NA	ANKUB1
1660.78	0.465714	0.211772	2.19913	0.0278685	0.156966	ANKZF1
3556.04	-0.00151513	0.278233	-0.00544553	0.995655	0.99884	ANLN
2.25359	1.83718	1.80799	1.01615	0.309559	0.686403	ANO1
1904.04	-0.164325	0.143704	-1.14349	0.252834	0.628009	ANO10
21.017	4.27374	1.00939	4.23398	2.29595e-05	0.000319635	ANO2
48.6405	-0.43383	0.46784	-0.927303	0.353769	0.724264	ANO3
30.7621	3.51974	0.726583	4.84424	1.27099e-06	2.12888e-05	ANO4
103.489	0.25348	0.350668	0.72285	0.469772	0.805451	ANO5
7003.06	0.472836	0.172882	2.73502	0.00623758	0.0487523	ANO6
101.073	-0.171455	0.322336	-0.531913	0.594786	0.870331	ANO7
1695.11	-0.182947	0.164075	-1.11502	0.264842	0.641446	ANO8
8.44055	0.626583	1.37842	0.454567	0.649421	0.893604	ANO9
49.6112	1.02415	0.463799	2.20819	0.0272312	0.154317	ANOS1
7378.93	-0.150014	0.134972	-1.11144	0.266377	0.642777	ANP32A
9547.66	-0.152741	0.151555	-1.00783	0.313537	0.690002	ANP32B
9.24448	-0.408767	0.772086	-0.529432	0.596506	0.871389	ANP32D
3925.77	-0.358583	0.21258	-1.68682	0.0916389	0.36025	ANP32E
1.99001	-0.190479	2.06591	-0.0922011	0.926538	0.981907	ANPEP
1232.3	4.78287	0.3975	12.0324	2.40121e-33	2.88795e-31	ANTXR1
14.6118	-0.429049	0.751611	-0.570839	0.568108	0.85901	ANTXR2
3.4654	5.07907	2.00686	2.53086	0.0113784	0.0790997	ANTXRL
5085.36	3.82509	0.331563	11.5365	8.63402e-31	9.02678e-29	ANXA1
0.316649	-1.84618	4.04796	-0.456077	0.648334	NA	ANXA10
2762.07	0.153796	0.162878	0.94424	0.345047	0.717068	ANXA11
4.45717	5.56225	1.77167	3.13955	0.00169207	0.0160493	ANXA13
15574.4	2.38832	0.347565	6.87159	6.34898e-12	1.95305e-10	ANXA2
314.309	-0.585803	0.299503	-1.95592	0.050475	0.244148	ANXA2R
274.507	8.58662	0.856282	10.0278	1.15048e-23	8.14292e-22	ANXA3
3557.15	0.936106	0.128539	7.28266	3.2729e-13	1.12346e-11	ANXA4
4165.28	1.02082	0.311403	3.27815	0.00104492	0.0104662	ANXA5
3.08303	2.49817	1.40222	1.78157	0.0748187	0.316693	ANXA6
5224.49	-0.0249707	0.109537	-0.227966	0.819673	0.951975	ANXA7
36.4029	6.78475	1.33974	5.06423	4.10062e-07	7.33708e-06	ANXA8
19.3552	7.70605	1.47299	5.23156	1.68086e-07	3.1741e-06	ANXA8L1
105.402	1.43823	0.381215	3.77275	0.00016146	0.00193317	ANXA9
2.96005	3.59316	1.83957	1.95326	0.0507887	0.245073	AOAH
42.5109	4.4258	0.741994	5.96473	2.45035e-09	5.75562e-08	AOC1
149.034	0.489546	0.363673	1.34611	0.178266	0.529241	AOC2
64.3961	0.467181	0.414195	1.12793	0.259351	0.634534	AOC3
282.2	7.33321	0.758558	9.6673	4.15183e-22	2.67793e-20	AOX1
109.081	-0.274012	0.403985	-0.678272	0.497599	0.822613	AP000275.65
7.33727	0.864946	1.37117	0.630809	0.528165	0.840982	AP000295.9
0	NA	NA	NA	NA	NA	AP000304.12
0.481664	0.708713	4.03925	0.175457	0.860721	NA	AP000322.53
0.45715	-2.37081	4.00661	-0.591726	0.554034	NA	AP000349.1
0.45715	-2.37081	4.00661	-0.591726	0.554034	NA	AP000349.2
10.8476	-0.69159	3.32768	-0.207829	0.835362	0.956853	AP000350.10
0	NA	NA	NA	NA	NA	AP000351.1
0.695935	1.36663	3.99958	0.341693	0.732582	NA	AP000687.1
3.38003	-0.427472	1.22012	-0.350354	0.726073	0.925001	AP000721.4
0	NA	NA	NA	NA	NA	AP000769.1
2.31881	1.17034	1.58121	0.740158	0.459204	0.79732	AP000866.1
0	NA	NA	NA	NA	NA	AP001888.1
8.04587	0.127532	1.40557	0.0907331	0.927705	0.982041	AP002884.2
0	NA	NA	NA	NA	NA	AP002962.1
779.592	-0.132172	0.178296	-0.741306	0.458508	0.796602	AP003419.11
0	NA	NA	NA	NA	NA	AP005242.1
19.6097	0.246365	0.548633	0.449054	0.653393	0.895106	AP006285.1
19.6097	0.246365	0.548633	0.449054	0.653393	0.895106	AP006285.2
928.381	-0.0570915	0.249308	-0.229	0.818869	0.951787	AP1AR
4666.72	0.171221	0.156144	1.09656	0.272835	0.649718	AP1B1
5965.33	-0.0372754	0.16138	-0.230979	0.817331	0.951689	AP1G1
1374.45	0.312317	0.285722	1.09308	0.274358	0.650829	AP1G2
3126.28	-0.00977415	0.166091	-0.0588483	0.953073	0.989496	AP1M1
0.946954	1.20393	3.03247	0.397013	0.691358	NA	AP1M2
2967.39	-0.150757	0.157059	-0.959871	0.33712	0.711891	AP1S1
534.97	0.345711	0.244012	1.41677	0.156549	0.492658	AP1S2
375.715	0.273409	0.284365	0.961473	0.336314	0.711034	AP1S3
5946.38	0.198132	0.175089	1.13161	0.257799	0.632813	AP2A1
5063.45	0.0602032	0.132146	0.455581	0.648691	0.893214	AP2A2
16790.1	0.0192325	0.103054	0.186626	0.851954	0.960452	AP2B1
16051.3	0.225169	0.155496	1.44807	0.147597	0.47677	AP2M1
3485.68	0.0483929	0.136599	0.35427	0.723137	0.924126	AP2S1
7861.55	-0.27956	0.124728	-2.24136	0.0250028	0.144855	AP3B1
96.4693	0.251123	0.39029	0.643428	0.519947	0.83621	AP3B2
14063.8	0.000684795	0.124236	0.00551206	0.995602	0.99884	AP3D1
2550.54	-0.0235173	0.137965	-0.170459	0.864649	0.964104	AP3M1
1233.55	-0.432257	0.152773	-2.8294	0.00466359	0.038197	AP3M2
2238.43	-0.152696	0.219889	-0.694423	0.487417	0.816804	AP3S1
1510.99	0.101193	0.155574	0.650446	0.515404	0.833587	AP3S2
872.705	-0.127652	0.153827	-0.829838	0.406631	0.763365	AP4B1
800.592	0.41965	0.220167	1.90606	0.0566427	0.263465	AP4E1
948.608	-0.37077	0.201875	-1.83664	0.0662638	0.292351	AP4M1
620.251	-0.257358	0.232304	-1.10785	0.267927	0.644669	AP4S1
2855.28	0.0040043	0.229623	0.0174386	0.986087	0.996963	AP5B1
1036.93	0.0581446	0.174614	0.332989	0.739143	0.929215	AP5M1
571.431	0.311852	0.17569	1.77501	0.0758958	0.318978	AP5S1
2273.86	0.0644104	0.186864	0.344691	0.730326	0.926706	AP5Z1
902.937	-0.115258	0.242789	-0.474725	0.634983	0.888723	APAF1
1964.01	0.243522	0.209331	1.16333	0.244694	0.618609	APBA1
1630.5	-0.00223813	0.172599	-0.0129672	0.989654	0.997498	APBA2
1062.29	0.0471774	0.180974	0.260686	0.794335	0.94519	APBA3
2114.94	0.0417954	0.179467	0.232886	0.81585	0.951329	APBB1
0.121099	0.870599	4.08047	0.213357	0.831048	NA	APBB1IP
1542.8	0.62301	0.244008	2.55324	0.0106727	0.0752738	APBB2
1545.52	0.0525067	0.166788	0.314811	0.752905	0.933892	APBB3
3073.92	-0.174176	0.189857	-0.917409	0.358928	0.727683	APC
2605.1	-0.615204	0.255838	-2.40467	0.0161873	0.104661	APC2
4.76425	-1.5197	1.44679	-1.05039	0.293537	0.67087	APCDD1
0.432702	1.91286	4.01858	0.476003	0.634072	NA	APCDD1L
147.53	7.17493	0.741605	9.67487	3.85568e-22	2.49698e-20	APCS
5342.99	-0.0548042	0.194418	-0.281888	0.778029	0.940834	APEH
9.35392	-1.31189	0.90176	-1.45481	0.145721	0.473483	APELA
10815.6	-0.330679	0.159296	-2.07588	0.037905	0.198406	APEX1
1664.79	0.00161461	0.139944	0.0115375	0.990795	0.998004	APEX2
8784.07	-0.120735	0.149019	-0.810199	0.417826	0.771505	APH1A
3709.87	-0.329889	0.135299	-2.43822	0.0147598	0.0978034	APH1B
4545.71	-0.124829	0.119516	-1.04446	0.296274	0.674162	API5
767.532	0.118716	0.195085	0.608535	0.542833	0.848337	APIP
317.043	-0.428476	0.169721	-2.52459	0.0115832	0.0802792	APITD1
25.6816	0.348427	0.622881	0.55938	0.575903	0.862964	APITD1-CORT
90.0129	0.323243	0.278726	1.15972	0.246165	0.620493	APLF
122.463	7.15174	0.696479	10.2684	9.77786e-25	7.27473e-23	APLN
9.90883	3.81161	1.13018	3.37258	0.000744673	0.00774498	APLNR
7042.28	-0.494447	0.254221	-1.94495	0.0517807	0.248138	APLP1
21850.4	0.280923	0.112279	2.50202	0.0123488	0.084379	APLP2
7622.73	-0.0990798	0.131111	-0.755692	0.449834	0.791384	APMAP
192.449	7.78696	0.792767	9.8225	9.00773e-23	6.13139e-21	APOA1
4654.97	-0.391409	0.138461	-2.82686	0.00470073	0.0384815	APOA1BP
2.72151	-0.903133	1.33569	-0.676153	0.498943	0.82301	APOA2
0	NA	NA	NA	NA	NA	APOA4
0	NA	NA	NA	NA	NA	APOA5
2.902	4.95588	2.06435	2.4007	0.0163638	0.105601	APOB
0	NA	NA	NA	NA	NA	APOBEC1
7.88835	2.20653	1.07066	2.0609	0.0393122	0.204168	APOBEC2
0.121099	0.870599	4.08047	0.213357	0.831048	NA	APOBEC3A
93.0863	0.791761	0.444272	1.78215	0.0747243	0.316693	APOBEC3B
2842.32	-0.0321947	0.132679	-0.242651	0.808276	0.948583	APOBEC3C
316.04	0.588236	0.262831	2.23808	0.025216	0.146038	APOBEC3D
767.253	0.449962	0.195036	2.30707	0.0210509	0.127408	APOBEC3F
22.2741	0.538048	0.490022	1.09801	0.272201	0.649158	APOBEC3G
15.8326	3.30407	0.825167	4.00412	6.22478e-05	0.000805596	APOBEC3H
0.578392	1.10271	3.3358	0.330568	0.740971	NA	APOBEC4
3.33674	1.76911	1.51546	1.16738	0.243056	0.616643	APOBR
379.669	-0.423494	0.355301	-1.19193	0.233288	0.605013	APOC1
0	NA	NA	NA	NA	NA	APOC2
0.121099	0.870599	4.08047	0.213357	0.831048	NA	APOC3
0.731956	-3.02524	3.06068	-0.988423	0.322946	NA	APOC4
0	NA	NA	NA	NA	NA	APOC4-APOC2
2.16368	4.50017	2.08111	2.16239	0.0305883	0.168374	APOD
387.484	0.461819	0.232621	1.98529	0.0471125	0.232764	APOE
1.23484	-1.3379	2.35415	-0.568316	0.569821	NA	APOF
0	NA	NA	NA	NA	NA	APOH
602.402	6.80505	0.531669	12.7994	1.65188e-37	2.46948e-35	APOL1
2902.89	2.29376	0.312866	7.33145	2.27676e-13	7.90682e-12	APOL2
90.2183	4.198	0.540513	7.76671	8.05538e-15	3.26212e-13	APOL3
10.975	4.07673	1.13539	3.5906	0.000329923	0.00368286	APOL4
0.254561	-1.63998	4.06208	-0.40373	0.686411	NA	APOL5
1898.77	2.59275	0.217199	11.9372	7.57511e-33	8.71737e-31	APOL6
208.466	-0.143339	0.328821	-0.435917	0.662897	0.899325	APOLD1
54.2068	0.0749294	0.421177	0.177905	0.858798	0.962486	APOM
1182.88	-0.418581	0.166933	-2.50748	0.0121595	0.0834064	APOO
679.39	0.0783886	0.187734	0.417552	0.676275	0.905007	APOOL
930.027	0.00721791	0.148865	0.0484864	0.961329	0.99126	APOPT1
47557.8	0.891241	0.174762	5.09973	3.40139e-07	6.16878e-06	APP
2440.12	0.374716	0.275752	1.35889	0.174182	0.522546	APPBP2
2837.31	-0.296447	0.211664	-1.40056	0.161346	0.500562	APPL1
2210.02	-0.148012	0.116574	-1.26969	0.204197	0.567025	APPL2
5038.13	-0.233897	0.13302	-1.75836	0.0786864	0.326927	APRT
1859.32	-0.323124	0.135016	-2.39322	0.0167011	0.10729	APTX
175.715	4.60137	0.43122	10.6706	1.39756e-26	1.13479e-24	AQP1
0	NA	NA	NA	NA	NA	AQP10
117.705	-0.0165035	0.288968	-0.0571118	0.954456	0.989707	AQP11
0	NA	NA	NA	NA	NA	AQP12A
0.242198	1.53756	4.04672	0.379952	0.703981	NA	AQP12B
0.242198	1.53756	4.04672	0.379952	0.703981	NA	AQP2
4.40702	4.04424	1.73313	2.33349	0.0196225	0.121019	AQP3
25.4435	0.023255	0.566644	0.0410399	0.967264	0.992235	AQP4
0.502889	2.43805	3.99297	0.610585	0.541475	NA	AQP5
3.04755	1.81621	1.50774	1.20459	0.228362	0.598086	AQP6
0.504411	2.44206	3.99272	0.61163	0.540783	NA	AQP7
0.393687	-0.676445	4.06206	-0.166528	0.867742	NA	AQP8
2.45273	0.599206	1.50863	0.397184	0.691232	0.911327	AQP9
2305.69	-0.127496	0.154246	-0.826573	0.408479	0.76438	AQR
3.94341	-2.17701	1.78116	-1.22225	0.221615	0.590459	AR
3655.29	0.205286	0.163367	1.25659	0.208901	0.574254	ARAF
4064.9	0.208998	0.233781	0.89399	0.371327	0.737894	ARAP1
305.257	0.607608	0.434724	1.39769	0.162207	0.502151	ARAP2
7.86336	5.31531	1.53326	3.46666	0.000526968	0.00565351	ARAP3
61.6547	1.89874	0.631162	3.00832	0.00262699	0.0235282	ARC
10422.3	-0.0587716	0.121497	-0.48373	0.628577	0.885402	ARCN1
3477.61	-0.262917	0.697847	-0.376755	0.706356	0.916744	AREG
3325.11	0.139886	0.163477	0.855689	0.39217	0.7548	AREL1
16527.9	0.110752	0.130119	0.851155	0.394683	0.756442	ARF1
12909.4	-0.175887	0.11318	-1.55404	0.120174	0.421873	ARF3
11708.8	-0.000399008	0.209508	-0.0019045	0.99848	0.999091	ARF4
7982.49	-0.164404	0.140737	-1.16816	0.242741	0.616246	ARF5
4134.59	0.542639	0.182878	2.96722	0.00300509	0.0263539	ARF6
6232.84	-0.0906363	0.129256	-0.701217	0.483168	0.815256	ARFGAP1
4017.91	-0.0576128	0.141771	-0.406379	0.684464	0.908127	ARFGAP2
2652.3	-0.137926	0.145911	-0.945274	0.344519	0.717068	ARFGAP3
2849.44	-0.0122526	0.131552	-0.0931388	0.925793	0.981788	ARFGEF1
2847.86	-0.06925	0.211808	-0.326947	0.743708	0.930433	ARFGEF2
348.653	-0.329621	0.197344	-1.67028	0.0948632	0.367862	ARFGEF3
828.529	0.0154626	0.167968	0.0920569	0.926653	0.981963	ARFIP1
4509.79	-0.0596942	0.144447	-0.41326	0.679416	0.906568	ARFIP2
1260.2	0.054544	0.182309	0.299184	0.7648	0.937347	ARFRP1
1.73643	0.175145	2.03299	0.0861516	0.931346	NA	ARG1
450.721	-0.13755	0.177149	-0.776462	0.437476	0.78302	ARG2
0	NA	NA	NA	NA	NA	ARGFX
4343.06	0.0275659	0.136914	0.201337	0.840435	0.958114	ARGLU1
3533.68	-0.0373347	0.219756	-0.169892	0.865095	0.964258	ARHGAP1
722.597	0.0633684	0.166606	0.380349	0.703687	0.916247	ARHGAP10
1926.67	-0.455259	0.293536	-1.55095	0.120914	0.423205	ARHGAP11A
324.347	-0.09412	0.384916	-0.244521	0.806827	0.947676	ARHGAP11B
663.125	0.276921	0.264697	1.04618	0.295477	0.673284	ARHGAP12
14.9753	-0.833622	0.728823	-1.14379	0.25271	0.628009	ARHGAP15
2247.48	0.141157	0.146882	0.961028	0.336538	0.71132	ARHGAP17
7329.92	-0.209459	0.156784	-1.33597	0.181558	0.534451	ARHGAP18
1436.63	-0.628535	0.246565	-2.54917	0.010798	0.0759901	ARHGAP19
4.80896	0.734399	1.76846	0.415277	0.677939	0.905579	ARHGAP19-SLIT1
14.5193	2.14988	0.886281	2.42573	0.0152776	0.100279	ARHGAP20
3366.48	0.121557	0.138561	0.877284	0.380332	0.74439	ARHGAP21
203.332	1.85688	0.304976	6.08861	1.13895e-09	2.79427e-08	ARHGAP22
1346.9	2.10832	0.317987	6.63022	3.35195e-11	9.55755e-10	ARHGAP23
317.297	0.0462404	0.318551	0.145159	0.884586	0.970321	ARHGAP24
4.32477	3.28337	1.53721	2.13593	0.0326852	0.177713	ARHGAP25
553.024	0.267118	0.320742	0.832813	0.40495	0.763108	ARHGAP26
367.956	0.784586	0.209917	3.7376	0.000185785	0.00219155	ARHGAP27
1106.81	-0.0452838	0.292237	-0.154956	0.876856	0.968125	ARHGAP28
1782.02	5.42064	0.427132	12.6908	6.6518e-37	9.85206e-35	ARHGAP29
66.2439	-0.149359	0.380247	-0.392794	0.694471	0.912456	ARHGAP30
5.68651	1.29653	1.2691	1.02162	0.306962	0.683974	ARHGAP31
1228.73	-0.00962779	0.24585	-0.0391612	0.968762	0.992569	ARHGAP32
826.625	-0.248221	0.322408	-0.769895	0.441362	0.785169	ARHGAP33
7903.24	0.0701104	0.165148	0.424531	0.671179	0.902249	ARHGAP35
2.81279	1.95946	1.70608	1.14852	0.250755	0.626241	ARHGAP36
800.799	-0.243679	0.171626	-1.41983	0.155658	0.491131	ARHGAP39
6268.03	-0.379151	0.271473	-1.39664	0.162521	0.502151	ARHGAP4
0.622766	0.57114	3.38627	0.168663	0.866061	NA	ARHGAP40
59.7838	0.0393885	0.464701	0.0847609	0.932451	0.984131	ARHGAP42
820.808	-0.220154	0.208415	-1.05633	0.290818	0.667709	ARHGAP44
3045.8	0.235226	0.215992	1.08905	0.276133	0.652826	ARHGAP5
12.2633	-0.421233	0.715325	-0.588869	0.555949	0.855418	ARHGAP6
33.4361	-0.400474	0.512281	-0.781747	0.434363	0.780887	ARHGAP8
22.826	0.729035	0.756928	0.963149	0.335473	0.710257	ARHGAP9
13015.3	0.183243	0.165053	1.1102	0.266912	0.643314	ARHGDIA
29.3719	1.74785	0.679818	2.57105	0.010139	0.0722096	ARHGDIB
163.211	0.252823	0.21494	1.17625	0.239495	0.612213	ARHGDIG
2293.22	-0.0333335	0.177579	-0.187711	0.851104	0.960306	ARHGEF1
3040.59	-0.11409	0.183378	-0.622159	0.533838	0.844116	ARHGEF10
538.708	0.215373	0.171445	1.25622	0.209037	0.574297	ARHGEF10L
3076.74	0.154556	0.130362	1.18559	0.235784	0.607589	ARHGEF11
7133.23	-0.00916511	0.150919	-0.0607287	0.951575	0.98908	ARHGEF12
1.13434	3.50113	2.68979	1.30163	0.193042	NA	ARHGEF15
92.6205	0.141707	0.319127	0.444044	0.65701	0.896489	ARHGEF16
281.501	0.735084	0.305433	2.40669	0.0160977	0.104335	ARHGEF17
2630.2	0.27009	0.157657	1.71315	0.086685	0.349009	ARHGEF18
36.3823	0.682414	0.456864	1.49369	0.135256	0.453196	ARHGEF19
4747.24	0.656152	0.251426	2.60972	0.00906152	0.0661863	ARHGEF2
1755.74	-0.433919	0.259331	-1.67322	0.0942831	0.366679	ARHGEF25
10853.9	-0.276394	0.265816	-1.03979	0.298436	0.676366	ARHGEF26
530.586	4.48474	0.328459	13.6539	1.91349e-42	3.51819e-40	ARHGEF28
1195.43	1.23083	0.310754	3.9608	7.46988e-05	0.000951339	ARHGEF3
7.43364	0.141189	1.31474	0.107389	0.91448	0.978174	ARHGEF33
0.490917	1.02536	4.02388	0.254818	0.798864	NA	ARHGEF35
7.47067	2.22584	1.09568	2.03147	0.042207	0.215679	ARHGEF37
1.92368	-2.4931	2.80695	-0.888189	0.374439	0.739996	ARHGEF38
744.02	-0.460067	0.229948	-2.00074	0.0454199	0.226901	ARHGEF39
75.7562	-0.0784914	0.348115	-0.225476	0.821609	0.95231	ARHGEF4
7163.23	0.204295	0.18943	1.07847	0.280823	0.657596	ARHGEF40
8.73748	0.467843	0.843482	0.554657	0.579129	0.863833	ARHGEF5
15.5235	1.62405	0.693773	2.34089	0.0192377	0.119135	ARHGEF6
2839.19	0.0913552	0.153098	0.596712	0.5507	0.853585	ARHGEF7
966.286	-0.149937	0.144383	-1.03847	0.299052	0.677282	ARHGEF9
24273.4	-0.0244903	0.171465	-0.14283	0.886424	0.970849	ARID1A
3924.01	-0.0634097	0.110046	-0.576211	0.564473	0.857449	ARID1B
3000.36	-0.346491	0.197102	-1.75792	0.0787604	0.32701	ARID2
976.284	-0.0785517	0.238644	-0.329159	0.742036	0.930001	ARID3A
2111.5	-0.367675	0.267582	-1.37407	0.169421	0.514537	ARID3B
4.24008	-0.525146	1.18703	-0.442404	0.658197	0.897438	ARID3C
1336.67	-0.339391	0.307147	-1.10498	0.269169	0.645869	ARID4A
2776.74	0.103594	0.15347	0.675011	0.499669	0.823485	ARID4B
400.107	0.72295	0.252024	2.86857	0.00412331	0.0342453	ARID5A
24037.2	-0.0768251	0.20205	-0.380228	0.703776	0.916247	ARID5B
4094.68	-0.0260093	0.186076	-0.139778	0.888835	0.971886	ARIH1
6456.17	-0.152514	0.161773	-0.942763	0.345802	0.71809	ARIH2
186.533	-0.484162	0.282028	-1.71672	0.086031	0.347163	ARIH2OS
3741.84	-0.0546208	0.147658	-0.369913	0.711447	0.918582	ARL1
255.839	-0.295647	0.237848	-1.24301	0.213865	0.580806	ARL10
0.636034	0.502941	3.24802	0.154846	0.876943	NA	ARL11
0.509122	-2.55081	3.9951	-0.638485	0.523158	NA	ARL13A
473.749	-0.114589	0.249912	-0.458519	0.64658	0.89267	ARL13B
7.67555	4.36237	1.45163	3.00516	0.00265443	0.0236943	ARL14
1132.05	0.0230258	0.215686	0.106756	0.914983	0.978174	ARL14EP
0.640772	1.81885	4.01278	0.453266	0.650358	NA	ARL14EPL
742.831	0.4319	0.221752	1.94767	0.0514543	0.247331	ARL15
1913.21	-0.321125	0.167544	-1.91667	0.05528	0.2588	ARL16
823.613	-0.257531	0.207359	-1.24196	0.214253	0.580879	ARL17A
477.156	-0.322479	0.191577	-1.68328	0.0923202	0.361772	ARL17B
3537.55	-0.168864	0.165577	-1.01985	0.307799	0.684551	ARL2
0	NA	NA	NA	NA	NA	ARL2-SNX15
2623.16	-0.077374	0.130499	-0.592908	0.553243	0.855161	ARL2BP
1720.28	-0.46697	0.150502	-3.10275	0.00191733	0.017904	ARL3
9494.97	-0.189681	0.228346	-0.830673	0.406158	0.763365	ARL4A
130.276	3.08365	0.38805	7.94652	1.91821e-15	8.20418e-14	ARL4C
1233.06	1.84279	0.278224	6.62341	3.50999e-11	9.99035e-10	ARL4D
1109.17	-0.00321846	0.17946	-0.0179342	0.985691	0.996963	ARL5A
2305.09	0.180548	0.466414	0.387097	0.698684	0.913831	ARL5B
0.916771	2.40887	3.75724	0.641128	0.52144	NA	ARL5C
215.588	-0.353233	0.223633	-1.57952	0.114217	0.40992	ARL6
5065.05	-0.16789	0.209938	-0.799711	0.423878	0.774058	ARL6IP1
5633.7	-0.109764	0.175004	-0.62721	0.530522	0.841967	ARL6IP4
2280.96	0.137509	0.201303	0.683095	0.494547	0.820534	ARL6IP5
577.963	-0.245167	0.207377	-1.18223	0.237115	0.609291	ARL6IP6
2025.27	0.236054	0.136209	1.73302	0.0830917	0.338547	ARL8A
3367.65	0.0255245	0.224421	0.113735	0.909448	0.976279	ARL8B
0.573756	0.926555	3.42652	0.270407	0.786847	NA	ARL9
1004.84	-0.0478253	0.146845	-0.325687	0.744662	0.930662	ARMC1
1583.49	-0.151322	0.130846	-1.15649	0.247481	0.622064	ARMC10
107.446	-0.50358	0.300413	-1.67629	0.0936811	0.365315	ARMC12
114.557	-0.462556	0.279356	-1.6558	0.0977628	0.373892	ARMC2
0	NA	NA	NA	NA	NA	ARMC3
61.7163	0.118296	0.489791	0.241523	0.80915	0.948982	ARMC4
1116.33	0.120309	0.17535	0.686108	0.492645	0.819411	ARMC5
2163.21	-0.317657	0.124933	-2.54261	0.0110026	0.0770555	ARMC6
403.047	0.230261	0.18105	1.27181	0.20344	0.56575	ARMC7
1468.02	-0.0435725	0.152227	-0.286233	0.7747	0.939436	ARMC8
1000.86	-0.119828	0.13743	-0.871917	0.383254	0.746247	ARMC9
10.7274	0.047215	0.831175	0.0568051	0.9547	0.989707	ARMCX1
4.00131	-0.476325	1.18404	-0.402287	0.687473	0.909755	ARMCX2
2.11593	-2.50587	2.14135	-1.17023	0.241909	0.615196	ARMCX3
432.778	-0.296633	0.224179	-1.3232	0.18577	0.539198	ARMCX4
874.326	-0.237566	0.233778	-1.0162	0.309534	0.686403	ARMCX5
0.4412	-0.583721	4.04792	-0.144203	0.88534	NA	ARMCX6
1.39784	-1.40477	2.22872	-0.630305	0.528495	NA	ARMS2
931.012	-0.168783	0.139653	-1.20859	0.226821	0.595793	ARMT1
2562.37	-0.280352	0.135683	-2.06623	0.0388067	0.202199	ARNT
2098.45	-0.0493176	0.152142	-0.324154	0.745821	0.931171	ARNT2
860.573	-0.107472	0.184729	-0.581783	0.560713	0.856257	ARNTL
1188.56	0.0515486	0.171531	0.300521	0.76378	0.937223	ARNTL2
4435.53	-0.0942964	0.129985	-0.72544	0.468182	0.80389	ARPC1A
3537.94	0.475019	0.122045	3.89218	9.93491e-05	0.00123962	ARPC1B
12300.1	-0.00574836	0.137	-0.0419588	0.966532	0.992084	ARPC2
10448.2	-0.174119	0.14476	-1.20281	0.22905	0.599261	ARPC3
5209.6	-0.361632	0.181315	-1.9945	0.0460979	0.229177	ARPC4
1014.47	-0.0886915	0.172882	-0.513018	0.607939	0.877512	ARPC4-TTLL3
10085.1	0.00537226	0.105052	0.0511389	0.959215	0.99094	ARPC5
2876.25	-0.204773	0.205773	-0.995136	0.31967	0.695139	ARPC5L
1565.98	-0.192256	0.208309	-0.922937	0.35604	0.726523	ARPIN
4192.39	-0.0497003	0.149687	-0.332028	0.739868	0.92936	ARPP19
23.1246	-0.364431	0.617038	-0.590614	0.554779	0.855161	ARPP21
0.354955	0.515403	4.07038	0.126623	0.899239	NA	ARR3
743.905	0.501488	0.256675	1.95379	0.0507265	0.24492	ARRB1
1208.54	-0.219332	0.214732	-1.02143	0.307053	0.683974	ARRB2
1354.91	0.0501422	0.177248	0.282892	0.77726	0.940685	ARRDC1
1913.26	-0.245496	0.277398	-0.884995	0.376159	0.740987	ARRDC2
2993.37	0.0355823	0.264688	0.134431	0.893062	0.972567	ARRDC3
1578.08	-0.202425	0.261995	-0.772629	0.439742	0.784619	ARRDC4
0.623731	-0.512312	3.98905	-0.128429	0.897809	NA	ARRDC5
1244.66	0.0686154	0.205479	0.33393	0.738433	0.928906	ARSA
1509.92	0.30415	0.187712	1.6203	0.105168	0.390499	ARSB
1058.86	-0.0079946	0.219972	-0.0363437	0.971008	0.992951	ARSD
0.369701	0.578655	4.04668	0.142995	0.886294	NA	ARSE
0	NA	NA	NA	NA	NA	ARSF
599.901	-0.211103	0.196443	-1.07462	0.282543	0.659022	ARSG
0	NA	NA	NA	NA	NA	ARSH
0.266575	-0.09004	4.08047	-0.0220661	0.982395	NA	ARSI
42.0425	3.42705	0.570829	6.00363	1.92949e-09	4.59971e-08	ARSJ
532.822	-0.0282293	0.221812	-0.127266	0.89873	0.973288	ARSK
0.121099	0.870599	4.08047	0.213357	0.831048	NA	ART1
0.325276	1.7068	4.03813	0.422672	0.672535	NA	ART3
2.0799	2.61646	2.55415	1.02439	0.30565	0.683131	ART4
4.06606	0.60303	1.1087	0.543906	0.586506	0.866255	ART5
21.4464	0.313934	0.738749	0.424954	0.67087	0.902204	ARTN
1170.43	-0.0478792	0.158616	-0.301856	0.762762	0.937107	ARV1
647.617	0.812576	0.226138	3.59328	0.000326547	0.00365531	ARVCF
20.5739	-0.148334	0.629608	-0.235597	0.813745	0.950901	ARX
1.01579	-3.49954	3.95285	-0.885319	0.375985	NA	AS3MT
1182	-0.16174	0.130115	-1.24305	0.21385	0.580806	ASAH1
103.359	0.181693	0.489919	0.370863	0.71074	0.918187	ASAH2
341.272	-0.226204	0.231692	-0.976314	0.328909	0.703921	ASAH2B
2868.84	0.617125	0.167994	3.67349	0.00023926	0.00276532	ASAP1
1125.89	0.187379	0.232549	0.805763	0.42038	0.772634	ASAP2
1294.41	0.751629	0.172285	4.36272	1.28458e-05	0.000186293	ASAP3
1836.22	-0.0533135	0.214588	-0.248447	0.803789	0.946991	ASB1
0	NA	NA	NA	NA	NA	ASB10
0	NA	NA	NA	NA	NA	ASB11
4.26278	1.6004	1.27308	1.25711	0.208716	0.573954	ASB12
1349.18	-0.153684	0.236903	-0.648718	0.516521	0.833909	ASB13
12.175	-0.241782	0.731665	-0.330455	0.741056	0.929725	ASB14
0.139281	0.870599	4.08047	0.213357	0.831048	NA	ASB15
92.6107	-0.113788	0.366361	-0.310589	0.756113	0.93498	ASB16
0	NA	NA	NA	NA	NA	ASB17
0.740493	1.74746	3.93761	0.443787	0.657197	NA	ASB18
2.77208	2.08517	1.57046	1.32774	0.184263	0.537466	ASB2
681.255	-0.0442023	0.221241	-0.199793	0.841643	0.958114	ASB3
2.58569	-1.51979	1.4708	-1.03331	0.301459	0.679402	ASB4
0	NA	NA	NA	NA	NA	ASB5
2424.77	0.27974	0.18683	1.4973	0.134317	0.451153	ASB6
824.755	-0.0529305	0.155372	-0.340669	0.733353	0.927417	ASB7
1144.76	-0.222789	0.143704	-1.55033	0.121062	0.423464	ASB8
1.08893	0.466981	2.91256	0.160334	0.872618	NA	ASB9
1291.11	0.0126021	0.197777	0.0637187	0.949194	0.988538	ASCC1
2454.47	0.099729	0.190204	0.524327	0.600051	0.873393	ASCC2
3592.55	0.03297	0.172099	0.191576	0.848075	0.959818	ASCC3
5.53653	1.72166	1.26	1.3664	0.171814	0.518849	ASCL1
0.827185	1.80304	3.02968	0.595124	0.551761	NA	ASCL2
0.595893	1.15942	3.31447	0.349806	0.726484	NA	ASCL3
0	NA	NA	NA	NA	NA	ASCL4
10.5562	0.349583	0.887095	0.394076	0.693525	0.912229	ASCL5
722.336	-0.0807827	0.195004	-0.414262	0.678682	0.906014	ASF1A
1615.46	-0.267795	0.36527	-0.733143	0.463471	0.800231	ASF1B
94.0499	-0.187102	0.35757	-0.523259	0.600794	0.87357	ASGR1
0.279923	0.241285	4.07048	0.0592769	0.952732	NA	ASGR2
4571.75	-0.07	0.129549	-0.540336	0.588965	0.867812	ASH1L
2241.32	-0.0787087	0.130586	-0.602737	0.546684	0.850657	ASH2L
2198.83	0.483587	0.18715	2.58395	0.0097675	0.0700632	ASIC1
35.2354	7.00677	1.1615	6.03252	1.61421e-09	3.8887e-08	ASIC2
150.383	0.127047	0.249912	0.508369	0.611195	0.879118	ASIC3
13.8983	0.782462	0.66309	1.18002	0.237991	0.610346	ASIC4
0	NA	NA	NA	NA	NA	ASIC5
0.689296	0.239864	3.22946	0.0742738	0.940793	NA	ASIP
1297.8	-0.37547	0.240252	-1.56282	0.118096	0.418119	ASL
0	NA	NA	NA	NA	NA	ASMT
3321.18	-0.538431	0.184535	-2.91778	0.00352533	0.0300753	ASMTL
4404.69	-0.216319	0.126508	-1.70992	0.0872799	0.350522	ASNA1
9145.29	-0.097683	0.29356	-0.332753	0.739321	0.929292	ASNS
2644.38	-0.237658	0.150727	-1.57674	0.114854	0.411226	ASNSD1
0.789874	0.0934778	3.17062	0.0294825	0.97648	NA	ASPA
7.5792	0.904359	0.903897	1.00051	0.317063	0.693167	ASPDH
3.8686	-1.10868	1.47517	-0.751561	0.452315	0.792787	ASPG
2268.47	0.704847	0.216072	3.26209	0.00110593	0.011029	ASPH
2016.38	-0.247324	0.140704	-1.75776	0.0787882	0.32701	ASPHD1
566.714	0.438674	0.22809	1.92325	0.0544486	0.256102	ASPHD2
932.29	-0.174797	0.323126	-0.540956	0.588538	0.867727	ASPM
1.59119	2.89196	2.49013	1.16137	0.245492	NA	ASPN
39.0402	0.290796	0.398382	0.729942	0.465426	0.801912	ASPRV1
1073.13	-0.121737	0.145728	-0.835374	0.403507	0.761854	ASPSCR1
1187.63	-0.394647	0.154281	-2.55798	0.0105283	0.0745178	ASRGL1
0.242198	1.53756	4.04672	0.379952	0.703981	NA	ASS1
296.992	0.0880695	0.245706	0.358434	0.720019	0.92339	ASTE1
0.196842	-1.05295	4.08047	-0.258047	0.796371	NA	ASTL
283.99	4.90737	0.3515	13.9612	2.68761e-44	5.24281e-42	ASTN1
1317.22	-0.377402	0.144197	-2.61727	0.00886366	0.0651577	ASTN2
1763.36	-0.213778	0.152569	-1.40119	0.161156	0.500367	ASUN
6027.17	0.133617	0.147639	0.90503	0.36545	0.733142	ASXL1
2114.13	-0.101292	0.12671	-0.799398	0.42406	0.774256	ASXL2
79.5773	-0.726467	0.459364	-1.58146	0.113772	0.409114	ASXL3
1.59914	-0.710058	2.55045	-0.278405	0.780702	NA	ASZ1
1762.52	0.113295	0.204073	0.55517	0.578778	0.863833	ATAD1
2997.28	-0.252466	0.228988	-1.10253	0.270232	0.647047	ATAD2
1528.05	-0.392203	0.265201	-1.47889	0.139169	0.45957	ATAD2B
2192.61	-0.107041	0.174779	-0.612436	0.540249	0.84714	ATAD3A
2191.49	-0.199966	0.185351	-1.07885	0.280654	0.657491	ATAD3B
11.2907	-0.243366	0.775801	-0.313696	0.753752	0.934	ATAD3C
401.827	-0.220422	0.380574	-0.579184	0.562465	0.856723	ATAD5
760.217	-0.157876	0.176122	-0.896397	0.370041	0.736673	ATAT1
914.369	-0.0759873	0.197303	-0.38513	0.700141	0.914836	ATCAY
916.073	-0.354086	0.227407	-1.55706	0.119457	0.42088	ATE1
687.32	0.0759078	0.199424	0.380635	0.703474	0.916247	ATF1
2020.45	-0.0788018	0.185643	-0.424481	0.671215	0.902249	ATF2
11794.6	0.463147	0.942679	0.491309	0.623208	0.883448	ATF3
36383.3	-0.166402	0.206329	-0.806493	0.419959	0.772634	ATF4
13816.7	-0.0234726	0.258018	-0.0909728	0.927514	0.982041	ATF5
2987.25	0.0327892	0.124945	0.262429	0.792991	0.944975	ATF6
6813.4	-0.167089	0.169853	-0.983729	0.325249	0.700571	ATF6B
1819.37	-0.214547	0.134898	-1.59044	0.111735	0.404244	ATF7
3346.25	-0.196596	0.126563	-1.55334	0.120341	0.422089	ATF7IP
548.951	-0.498445	0.227084	-2.19498	0.028165	0.158413	ATF7IP2
711.643	-0.318594	0.221191	-1.44036	0.149765	0.480475	ATG10
4265.19	-0.0113678	0.254878	-0.0446012	0.964425	0.992052	ATG101
1612.98	0.0922292	0.181172	0.509069	0.610704	0.87901	ATG12
3495.71	0.0759172	0.186869	0.406259	0.684553	0.908127	ATG13
832.445	0.103588	0.314954	0.328898	0.742233	0.930102	ATG14
1737.73	0.127786	0.162938	0.78426	0.432887	0.779823	ATG16L1
1059.12	-0.270137	0.162452	-1.66287	0.0963388	0.371334	ATG16L2
1546.14	0.270426	0.17273	1.5656	0.117442	0.416727	ATG2A
1748.19	0.113389	0.149289	0.759524	0.447539	0.789792	ATG2B
2350.3	-0.228887	0.114913	-1.99183	0.0463894	0.230163	ATG3
558.927	0.275138	0.221335	1.24309	0.213836	0.580806	ATG4A
3148.71	0.0346586	0.112251	0.308759	0.757505	0.935476	ATG4B
6252.5	-0.630767	0.332271	-1.89835	0.05765	0.266974	ATG4C
763.798	0.0330351	0.215643	0.153193	0.878246	0.968315	ATG4D
1261.07	-0.0289275	0.168666	-0.171508	0.863824	0.963874	ATG5
1128.36	0.0569103	0.143566	0.396404	0.691807	0.911422	ATG7
6125.41	0.466645	0.204881	2.27764	0.0227483	0.135473	ATG9A
30.3004	1.56168	0.591333	2.64095	0.00826748	0.0615673	ATG9B
3253.16	-0.00433768	0.182231	-0.0238032	0.98101	0.996395	ATHL1
5384.8	-0.135922	0.126056	-1.07827	0.280914	0.657616	ATIC
42.0926	-0.521389	0.42399	-1.22972	0.218802	0.586748	ATL1
1287.05	-0.127177	0.130416	-0.975165	0.329479	0.704403	ATL2
1626.19	-0.149582	0.205567	-0.727654	0.466825	0.802888	ATL3
2737.96	-0.0502645	0.221848	-0.226572	0.820757	0.952161	ATM
4273.1	0.0407699	0.159814	0.255108	0.798639	0.945596	ATMIN
10886.1	0.429336	0.136426	3.14704	0.00164933	0.0157235	ATN1
0.399523	2.10611	4.01473	0.524595	0.599865	NA	ATOH1
4.61053	-0.163383	1.01312	-0.161267	0.871883	0.966571	ATOH7
21.0513	0.736202	0.837397	0.879155	0.379317	0.743557	ATOH8
4051.56	0.522967	0.245418	2.13093	0.0330953	0.17924	ATOX1
132.118	5.82658	0.598933	9.72826	2.28467e-22	1.52273e-20	ATP10A
188.95	6.6704	0.599994	11.1174	1.03181e-28	9.54035e-27	ATP10B
486.869	1.01592	0.20479	4.96081	7.02012e-07	1.21672e-05	ATP10D
2833.45	0.272689	0.199054	1.36993	0.17071	0.517272	ATP11A
2576.99	-0.282823	0.166571	-1.69791	0.0895246	0.356228	ATP11B
758.529	-0.19547	0.241543	-0.809254	0.418369	0.771617	ATP11C
2.7025	-1.37723	1.50575	-0.914643	0.360379	0.72903	ATP12A
5687.16	0.119897	0.12727	0.942073	0.346155	0.718358	ATP13A1
2085.11	0.0859621	0.191891	0.447975	0.654172	0.895292	ATP13A2
4463.23	0.132929	0.154643	0.859583	0.390019	0.75229	ATP13A3
3.43572	0.728539	1.2143	0.599967	0.548528	0.852112	ATP13A4
1.35599	2.09013	2.3032	0.90749	0.364148	NA	ATP13A5
16019.5	1.15122	0.12794	8.99812	2.29623e-19	1.28879e-17	ATP1A1
28.7356	6.22351	1.1363	5.47698	4.32645e-08	8.7271e-07	ATP1A2
614.011	-0.376802	0.168756	-2.23281	0.0255612	0.147769	ATP1A3
0.91105	3.28108	3.45259	0.950323	0.341948	NA	ATP1A4
622.004	3.49466	0.382006	9.14818	5.79027e-20	3.38034e-18	ATP1B1
81.8567	1.69865	0.301579	5.63251	1.77607e-08	3.72346e-07	ATP1B2
12130.6	-0.0908064	0.156154	-0.581517	0.560892	0.856273	ATP1B3
0.510763	-0.984722	4.03162	-0.24425	0.807037	NA	ATP1B4
372.53	-0.347505	0.343683	-1.01112	0.311959	0.688786	ATP2A1
15595.1	-0.195292	0.140971	-1.38533	0.16595	0.508728	ATP2A2
730.173	-0.142256	0.265257	-0.536295	0.591755	0.868733	ATP2A3
1885.77	-0.00432295	0.233273	-0.0185317	0.985215	0.996963	ATP2B1
24.2246	-1.43988	0.679379	-2.1194	0.0340563	0.183176	ATP2B2
0.12728	-1.05295	4.08047	-0.258047	0.796371	NA	ATP2B3
4745.62	1.1383	0.220228	5.16874	2.35676e-07	4.34818e-06	ATP2B4
3997.33	-0.0373478	0.149737	-0.249423	0.803033	0.946986	ATP2C1
2.34197	-0.0478111	1.77383	-0.0269536	0.978497	0.995423	ATP2C2
3.22392	1.57088	1.40153	1.12083	0.26236	0.638167	ATP4A
0.12728	-1.05295	4.08047	-0.258047	0.796371	NA	ATP4B
32521	-0.187811	0.126164	-1.48863	0.136585	0.455582	ATP5A1
35356	-0.0397679	0.121927	-0.32616	0.744303	0.930582	ATP5B
7554.67	-0.213727	0.142076	-1.50432	0.1325	0.447806	ATP5C1
3540.21	0.0624047	0.158848	0.392858	0.694424	0.912456	ATP5D
11950.8	-0.282442	0.1413	-1.99888	0.0456212	0.22748	ATP5E
120.943	-0.575355	0.279478	-2.05868	0.039525	0.204874	ATP5EP2
6754.6	-0.256342	0.102979	-2.48927	0.0128005	0.0870664	ATP5F1
4848.24	-0.33765	0.218463	-1.54557	0.122208	0.425893	ATP5G1
8833.36	-0.225955	0.135106	-1.67243	0.09444	0.367022	ATP5G2
11244.8	-0.23127	0.136247	-1.69744	0.0896143	0.356496	ATP5G3
5303.46	-0.216922	0.155758	-1.39268	0.163715	0.504349	ATP5H
4106.68	-0.132697	0.174661	-0.75974	0.44741	0.789673	ATP5I
4521.48	-0.235075	0.104235	-2.25525	0.0241178	0.141035	ATP5J
7784	-0.15316	0.147036	-1.04165	0.297575	0.675657	ATP5J2
633.14	-0.145096	0.172184	-0.84268	0.399407	0.759139	ATP5J2-PTCD1
9133.44	-0.431969	0.156047	-2.76819	0.00563681	0.0448813	ATP5L
81.1245	-0.45734	0.343237	-1.33243	0.182717	0.535233	ATP5L2
6943.78	-0.242367	0.105486	-2.29763	0.0215827	0.129837	ATP5O
685.182	0.018004	0.237505	0.0758048	0.939574	0.9855	ATP5S
2216.96	-0.189876	0.139105	-1.36499	0.172258	0.519893	ATP5SL
5141.03	0.121376	0.121373	1.00002	0.3173	0.693167	ATP6AP1
88.2921	0.510763	0.438642	1.16442	0.244254	0.618407	ATP6AP1L
5181.37	-0.109393	0.141065	-0.775477	0.438058	0.78302	ATP6AP2
5520.78	0.0962483	0.1525	0.631137	0.527951	0.840809	ATP6V0A1
1658.28	-0.176028	0.213076	-0.826129	0.408731	0.764396	ATP6V0A2
10.0313	5.84436	1.43168	4.08216	4.46181e-05	0.000589844	ATP6V0A4
4967.96	-0.217422	0.140409	-1.54849	0.121505	0.424643	ATP6V0B
7174.06	0.0325719	0.141796	0.22971	0.818317	0.951778	ATP6V0C
3646.98	0.00876117	0.151788	0.0577196	0.953972	0.989707	ATP6V0D1
386.637	0.294324	0.318141	0.925134	0.354896	0.725131	ATP6V0D2
5923.11	0.320735	0.18988	1.68915	0.0911912	0.358963	ATP6V0E1
2572.91	-0.206568	0.139211	-1.48385	0.13785	0.457478	ATP6V0E2
3563.88	-0.216829	0.172085	-1.26002	0.207664	0.572377	ATP6V1A
184.423	0.687676	0.292119	2.35409	0.018568	0.115976	ATP6V1B1
3683.41	0.0549308	0.162644	0.337737	0.735561	0.928323	ATP6V1B2
3357.23	-0.0207954	0.151743	-0.137043	0.890997	0.971913	ATP6V1C1
229.22	-0.0621952	0.23671	-0.262749	0.792744	0.944975	ATP6V1C2
1912.01	0.314681	0.229318	1.37225	0.169987	0.515863	ATP6V1D
5631.13	0.0671842	0.119712	0.561215	0.574651	0.862223	ATP6V1E1
672.779	-0.570502	0.245392	-2.32486	0.0200794	0.123108	ATP6V1E2
5782.48	-0.0304759	0.134298	-0.226928	0.82048	0.952147	ATP6V1F
4232.49	0.00247494	0.124608	0.0198617	0.984154	0.996811	ATP6V1G1
61.6475	-0.615323	0.392626	-1.5672	0.117069	0.415863	ATP6V1G2
0	NA	NA	NA	NA	NA	ATP6V1G2-DDX39B
4.67799	0.393333	1.07591	0.365583	0.714676	0.921041	ATP6V1G3
1783.5	0.154356	0.157815	0.97808	0.328035	0.702913	ATP6V1H
565.44	0.176398	0.183941	0.958996	0.337561	0.712003	ATP7A
1289.79	-0.139051	0.181	-0.768235	0.442348	0.785638	ATP7B
220.871	0.0677677	0.334244	0.202749	0.839331	0.958089	ATP8A1
28.1885	-0.895255	0.629231	-1.42278	0.154801	0.489851	ATP8A2
296.468	2.58327	0.357392	7.2281	4.89784e-13	1.66693e-11	ATP8B1
3978.64	0.395667	0.157113	2.51835	0.0117905	0.0813984	ATP8B2
29.4982	0.631096	0.621308	1.01575	0.309746	0.686621	ATP8B3
5.40613	2.33688	1.41049	1.65678	0.097563	0.373559	ATP8B4
21509.1	-0.126578	0.3064	-0.413113	0.679524	0.906636	ATP9A
1128.47	-0.00383847	0.169288	-0.0226742	0.98191	0.996424	ATP9B
3180.87	0.0171986	0.134791	0.127594	0.89847	0.973288	ATPAF1
1840.42	-0.0776008	0.135374	-0.573235	0.566486	0.858379	ATPAF2
4045.83	-0.221994	0.13626	-1.62919	0.103273	0.385341	ATPIF1
1836.38	0.0680537	0.209931	0.324172	0.745808	0.931171	ATR
4275.9	-0.247442	0.191688	-1.29086	0.196753	0.556741	ATRAID
804.116	-0.00663626	0.170781	-0.0388584	0.969003	0.992569	ATRIP
3626.6	-0.217883	0.17733	-1.22869	0.219189	0.587238	ATRN
12.1788	0.182813	0.802647	0.227763	0.81983	0.951975	ATRNL1
3273.61	-0.18626	0.221273	-0.841765	0.39992	0.759243	ATRX
57.1819	3.15092	0.659899	4.77486	1.79833e-06	2.95947e-05	ATXN1
5389.96	0.0357565	0.178494	0.200323	0.841228	0.958114	ATXN10
2517.2	0.229798	0.233323	0.984892	0.324677	0.700032	ATXN1L
2679.99	-0.0393616	0.223131	-0.176405	0.859975	0.962686	ATXN2
10765.1	0.0542136	0.163749	0.331078	0.740585	0.929424	ATXN2L
1033.12	-0.0622561	0.14409	-0.432063	0.665696	0.900613	ATXN3
4.67321	-0.954138	1.39937	-0.681833	0.495344	0.820974	ATXN3L
2278.67	-0.00641534	0.425842	-0.0150651	0.98798	0.997025	ATXN7
369.855	0.0338237	0.293979	0.115055	0.908402	0.976279	ATXN7L1
439.271	-0.0436186	0.213378	-0.20442	0.838026	0.957641	ATXN7L2
4055.29	-0.174271	0.175115	-0.995182	0.319648	0.695139	ATXN7L3
4932.29	0.0515077	0.159925	0.322074	0.747397	0.9318	ATXN7L3B
405.056	0.148664	0.182202	0.815929	0.414541	0.769105	AUH
537.823	-0.150735	0.343193	-0.439214	0.660506	0.898866	AUNIP
7476.29	-0.200123	0.149257	-1.3408	0.179987	0.531389	AUP1
1345.77	-0.235923	0.269703	-0.874751	0.38171	0.745542	AURKA
4514.25	0.00914617	0.120405	0.0759614	0.93945	0.9855	AURKAIP1
1089.9	-0.455152	0.403143	-1.12901	0.258895	0.634097	AURKB
8.73906	0.372058	0.866318	0.42947	0.667581	0.901265	AURKC
270.34	1.26951	0.298466	4.25347	2.10484e-05	0.000294826	AUTS2
387.073	1.03814	0.217913	4.764	1.89791e-06	3.11375e-05	AVEN
68.4828	0.196723	0.423347	0.464685	0.642157	0.891121	AVIL
1857.38	-0.124485	0.188631	-0.659941	0.509292	0.828755	AVL9
0	NA	NA	NA	NA	NA	AVP
584.415	0.260456	0.248148	1.0496	0.293902	0.671225	AVPI1
66.0547	-0.348475	0.472587	-0.737377	0.460893	0.798661	AVPR1A
0	NA	NA	NA	NA	NA	AVPR1B
44.0636	0.0293042	0.390474	0.0750477	0.940177	0.985745	AVPR2
0.242198	1.53756	4.04672	0.379952	0.703981	NA	AWAT1
0.12728	-1.05295	4.08047	-0.258047	0.796371	NA	AWAT2
3.22418	-0.235508	1.90265	-0.123779	0.90149	0.973945	AXDND1
3147.08	-0.0580062	0.171026	-0.339166	0.734485	0.927953	AXIN1
990.096	3.07909	0.401106	7.67651	1.63484e-14	6.39385e-13	AXIN2
562.316	1.46929	0.30994	4.74056	2.13127e-06	3.46461e-05	AXL
2.66242	3.85408	1.84981	2.0835	0.0372061	0.195772	AZGP1
2081.1	0.230172	0.193385	1.19023	0.233958	0.605761	AZI2
6389.36	0.366077	0.393738	0.929747	0.352502	0.723349	AZIN1
103.607	0.190986	0.478689	0.398977	0.68991	0.911146	AZIN2
96.7985	-0.388886	0.342311	-1.13606	0.255932	0.631168	AZU1
52032	2.0239	0.200204	10.1092	5.03096e-24	3.57667e-22	B2M
0	NA	NA	NA	NA	NA	B3GALNT1
864.25	-0.0554293	0.16826	-0.329425	0.741834	0.929842	B3GALNT2
52.5115	-0.330892	0.399025	-0.829253	0.406961	0.763552	B3GALT1
54.8132	4.12424	0.574083	7.18406	6.76722e-13	2.25049e-11	B3GALT2
66.8569	0.167881	0.423792	0.39614	0.692002	0.911469	B3GALT4
1.86863	2.97623	2.39743	1.24143	0.214448	0.581311	B3GALT5
1504.6	-0.334751	0.265091	-1.26278	0.206669	0.570771	B3GALT6
17.5445	1.47998	0.655077	2.25925	0.0238679	0.140055	B3GAT1
87.9399	-0.354413	0.305163	-1.16139	0.245484	0.619558	B3GAT2
6449.9	-0.284877	0.13551	-2.10226	0.0355301	0.188817	B3GAT3
293.755	0.38521	0.23656	1.62838	0.103445	0.385892	B3GLCT
1122.61	0.898332	0.256066	3.5082	0.000451145	0.00492259	B3GNT2
0.317778	-0.0890969	4.08047	-0.0218349	0.98258	NA	B3GNT3
160.505	0.0313513	0.283441	0.11061	0.911926	0.977234	B3GNT4
15.3133	0.572138	0.801307	0.714005	0.475224	0.810154	B3GNT5
0.260366	1.6064	4.04281	0.397346	0.691112	NA	B3GNT6
8.75512	0.763791	0.787724	0.969617	0.332237	0.707276	B3GNT7
4.02315	1.74556	1.23511	1.41328	0.157573	0.494066	B3GNT8
128.935	0.397582	0.400798	0.991974	0.32121	0.69676	B3GNT9
417.082	-0.419901	0.33188	-1.26522	0.205792	0.56923	B3GNTL1
4837.27	-0.355089	0.247544	-1.43445	0.151444	0.484402	B4GALNT1
2.56059	3.09108	1.98413	1.5579	0.119256	0.420644	B4GALNT2
199.374	0.098583	0.269038	0.366428	0.714046	0.920431	B4GALNT3
2364.42	-0.119692	0.25955	-0.461152	0.64469	0.891944	B4GALNT4
3825.55	0.95793	0.223244	4.29095	1.77912e-05	0.000253417	B4GALT1
4167.22	-0.322044	0.163437	-1.97044	0.0487881	0.238706	B4GALT2
2397.93	-0.204253	0.172824	-1.18185	0.237264	0.609486	B4GALT3
778.245	0.542444	0.173865	3.11992	0.001809	0.0170517	B4GALT4
19892	0.076102	0.219954	0.34599	0.72935	0.926362	B4GALT5
6246.4	-0.549938	0.171041	-3.21523	0.00130338	0.012736	B4GALT6
2708.96	-0.181095	0.117948	-1.53537	0.124693	0.431261	B4GALT7
1632.87	0.0201607	0.244101	0.0825916	0.934176	0.984782	B4GAT1
1027.98	-0.62548	0.209834	-2.98083	0.00287465	0.0253769	B9D1
127.243	-0.184058	0.269651	-0.68258	0.494873	0.820734	B9D2
17.1067	1.1082	0.703865	1.57445	0.115384	0.412166	BAALC
8.90447	0.0883501	0.91753	0.0962913	0.923289	0.980878	BAAT
2949.36	-0.0120844	0.150062	-0.0805294	0.935816	0.9855	BABAM1
2896.32	0.0324073	0.217742	0.148834	0.881685	0.969808	BACE1
2358.12	0.990892	0.221003	4.48361	7.33896e-06	0.00011054	BACE2
1219.28	0.533559	0.43888	1.21573	0.224088	0.592514	BACH1
44.4953	1.19594	0.554394	2.1572	0.0309903	0.170176	BACH2
1313.55	-0.367225	0.138397	-2.65343	0.00796787	0.0596975	BAD
1883.26	-0.13687	0.139524	-0.980976	0.326605	0.701762	BAG1
1961.21	-0.235488	0.228154	-1.03215	0.302003	0.679634	BAG2
3582.4	0.398604	0.242309	1.64503	0.0999643	0.378737	BAG3
1068.86	0.0595332	0.215243	0.276586	0.782098	0.942193	BAG4
2479.06	-0.14134	0.149641	-0.944523	0.344902	0.717068	BAG5
9510.1	-0.129332	0.13407	-0.96466	0.334715	0.709538	BAG6
0	NA	NA	NA	NA	NA	BAGE5
982.615	0.23903	0.210947	1.13313	0.257161	0.632368	BAHCC1
2614.01	0.122881	0.160076	0.767638	0.442702	0.785819	BAHD1
602.208	0.253701	0.182681	1.38877	0.164904	0.506563	BAIAP2
2830.56	-0.310995	0.175688	-1.77015	0.0767016	0.321183	BAIAP2L1
16.5917	-0.556425	0.574211	-0.969026	0.332532	0.707356	BAIAP2L2
88.7063	0.339892	0.298244	1.13965	0.254434	0.629981	BAIAP3
2153.31	0.376399	0.172668	2.17989	0.0292653	0.163094	BAK1
490.714	4.2075	0.946221	4.44663	8.72267e-06	0.000130035	BAMBI
8436.4	-0.22859	0.138578	-1.64954	0.0990377	0.376654	BANF1
0	NA	NA	NA	NA	NA	BANF2
1.70722	3.38142	2.53158	1.3357	0.181649	NA	BANK1
519.04	-0.255681	0.287042	-0.890743	0.373067	0.738449	BANP
5754.81	-0.0281861	0.134003	-0.210338	0.833404	0.95648	BAP1
930.025	-0.15125	0.354948	-0.426118	0.670022	0.901984	BARD1
0.509932	-2.51746	3.99634	-0.629941	0.528733	NA	BARHL1
22.8992	0.165214	0.502652	0.328684	0.742394	0.930158	BARHL2
3942.7	-0.16004	0.138235	-1.15774	0.246971	0.621644	BARX1
4.47028	3.57708	1.45896	2.4518	0.0142146	0.0946611	BARX2
550.02	2.61044	0.423271	6.1673	6.94664e-10	1.74167e-08	BASP1
0.139281	0.870599	4.08047	0.213357	0.831048	NA	BATF
1378.09	4.56681	0.260057	17.5608	4.91688e-69	2.53711e-66	BATF2
88.7124	0.107584	0.365955	0.293982	0.768771	0.938859	BATF3
8169.11	-0.139975	0.156855	-0.89239	0.372184	0.738449	BAX
3297.87	0.0269105	0.356248	0.0755387	0.939786	0.9855	BAZ1A
7763.05	-0.0877588	0.222238	-0.394887	0.692926	0.911742	BAZ1B
8096.15	0.110966	0.166146	0.667884	0.504208	0.826432	BAZ2A
1130.92	0.239556	0.17203	1.39252	0.163764	0.504349	BAZ2B
3589.95	-0.367215	0.165712	-2.21599	0.0266924	0.15211	BBC3
769.82	-0.11547	0.161718	-0.714025	0.475212	0.810154	BBIP1
169.677	-0.11791	0.276379	-0.426626	0.669652	0.90189	BBOF1
3.38612	4.37452	1.69777	2.57662	0.00997702	0.0713103	BBOX1
800.281	0.023346	0.149746	0.155905	0.876108	0.967883	BBS1
526.162	0.13518	0.192469	0.702344	0.482464	0.814653	BBS10
297.006	-0.166002	0.180449	-0.919937	0.357606	0.727064	BBS12
1522.14	-0.0177242	0.162368	-0.109161	0.913075	0.977875	BBS2
1455.41	-0.383557	0.156977	-2.4434	0.0145495	0.0966105	BBS4
799.199	0.000456276	0.162359	0.00281029	0.997758	0.999007	BBS5
1055.92	-0.145932	0.183338	-0.795968	0.42605	0.77555	BBS7
536.357	-0.0302034	0.241406	-0.125115	0.900433	0.973696	BBS9
2895.72	-0.00224914	0.186057	-0.0120885	0.990355	0.997966	BBX
1689.95	1.8881	0.204363	9.23895	2.48918e-20	1.4747e-18	BCAM
73.1809	0.10131	0.355009	0.285372	0.775359	0.939665	BCAN
1393.8	0.0294851	0.129313	0.228014	0.819635	0.951975	BCAP29
12604.7	-0.124237	0.106913	-1.16204	0.245219	0.619238	BCAP31
2232.97	0.602371	0.22734	2.64965	0.00805751	0.0601718	BCAR1
555.277	1.77242	0.398221	4.45085	8.55311e-06	0.000127626	BCAR3
55.377	-0.442925	0.612782	-0.722811	0.469796	0.805451	BCAS1
1411.72	0.0703755	0.189565	0.371248	0.710453	0.917912	BCAS2
891.872	0.224953	0.139571	1.61174	0.107018	0.393577	BCAS3
12326.1	-0.271553	0.167991	-1.61647	0.105992	0.391669	BCAS4
9.7822	5.48039	1.26782	4.32268	1.54142e-05	0.000221931	BCAT1
3614.8	-0.166868	0.197756	-0.84381	0.398775	0.758931	BCAT2
4922.83	-0.0853338	0.134344	-0.635186	0.525307	0.839022	BCCIP
483.727	-0.247497	0.253517	-0.976253	0.328939	0.703921	BCDIN3D
8.16554	-0.140337	0.882237	-0.159069	0.873614	0.96735	BCHE
1430.6	0.0365415	0.204401	0.178773	0.858116	0.962225	BCKDHA
1082.27	-0.351362	0.147064	-2.38918	0.0168859	0.108346	BCKDHB
1900.79	-0.0020551	0.156636	-0.0131202	0.989532	0.997498	BCKDK
758.526	0.772913	0.48124	1.60609	0.108255	0.39644	BCL10
3.40502	0.645577	1.3832	0.466729	0.640694	0.890899	BCL11A
1.53647	2.51856	2.49932	1.0077	0.313601	NA	BCL11B
44.1369	-0.330879	0.517036	-0.639954	0.522202	0.836989	BCL2
1.81104	1.20553	2.08828	0.577284	0.563748	0.857187	BCL2A1
6578.1	1.8655	0.273157	6.82939	8.52744e-12	2.57917e-10	BCL2L1
1.03058	0.0523357	2.11946	0.024693	0.9803	NA	BCL2L10
355.597	0.5597	0.417774	1.33972	0.180336	0.532029	BCL2L11
1783.16	-0.244396	0.148176	-1.64936	0.0990733	0.3767	BCL2L12
3628.36	0.0602916	0.139739	0.431459	0.666134	0.900717	BCL2L13
3.24738	5.11729	1.85429	2.75971	0.00578525	0.0458123	BCL2L14
5.98595	0.922512	1.02586	0.899259	0.368515	0.735673	BCL2L15
2646.86	0.0468715	0.157088	0.298377	0.765416	0.937802	BCL2L2
1016.79	0.210096	0.211848	0.991731	0.321329	0.69676	BCL2L2-PABPN1
3844.77	0.187623	0.420742	0.445933	0.655646	0.895834	BCL3
1538.69	0.333237	0.726404	0.458749	0.646415	0.89267	BCL6
23.2922	-0.0779459	0.69583	-0.112019	0.910809	0.976691	BCL6B
1749.6	-0.2087	0.188922	-1.10469	0.269293	0.645883	BCL7A
4198.43	-0.210003	0.284485	-0.738186	0.460401	0.798197	BCL7B
3736.8	-0.364866	0.161149	-2.26416	0.0235644	0.138681	BCL7C
2795.96	-0.359741	0.156704	-2.29568	0.0216943	0.130411	BCL9
6964.98	0.402825	0.314906	1.27919	0.200831	0.56241	BCL9L
7145.83	-0.117941	0.1523	-0.774399	0.438695	0.783684	BCLAF1
1.54037	4.01679	2.32071	1.73085	0.083479	NA	BCO1
158.356	4.23157	0.381724	11.0854	1.47656e-28	1.35742e-26	BCO2
3656.19	0.0648568	0.477717	0.135764	0.892008	0.972193	BCOR
1200.52	0.1358	0.246247	0.55148	0.581305	0.86483	BCORL1
4425.65	-0.013582	0.152447	-0.0890931	0.929008	0.982568	BCR
1605.3	-0.117445	0.166853	-0.703878	0.481508	0.814133	BCS1L
4.53572	3.84506	1.61483	2.38108	0.0172617	0.110051	BDH1
233.387	0.740897	0.228665	3.24011	0.00119485	0.011769	BDH2
23.8661	6.18537	1.40418	4.40498	1.05792e-05	0.000155328	BDKRB1
3.31057	2.03108	1.87275	1.08454	0.278125	0.655019	BDKRB2
497.954	0.601912	0.166172	3.62223	0.000292071	0.00331816	BDNF
2837.18	0.195067	0.11933	1.63468	0.102115	0.383577	BDP1
48.0751	1.41551	0.555799	2.5468	0.0108715	0.0763727	BEAN1
2628.92	0.516239	0.219145	2.3557	0.0184881	0.115702	BECN1
0	NA	NA	NA	NA	NA	BECN2
325.488	-0.0499784	0.261957	-0.190789	0.848691	0.959818	BEGAIN
0	NA	NA	NA	NA	NA	BEND2
849.689	-0.301817	0.229006	-1.31795	0.187522	0.540944	BEND3
173.943	-0.401893	0.314804	-1.27664	0.201728	0.56364	BEND4
2.73879	-1.5032	1.56097	-0.962993	0.335551	0.710266	BEND5
323.105	-0.423821	0.319563	-1.32625	0.184757	0.537926	BEND6
866.037	0.0905368	0.14647	0.618124	0.536493	0.8463	BEND7
435.628	0.230836	0.180402	1.27956	0.200698	0.562138	BEST1
2.43237	-0.318549	1.43773	-0.221565	0.824653	0.953393	BEST2
1.17082	3.63634	2.60246	1.39727	0.162332	NA	BEST3
5.31618	0.377241	1.06026	0.355799	0.721991	0.924126	BEST4
595.38	-0.0732532	0.157272	-0.465775	0.641377	0.890949	BET1
4270.63	-0.0511854	0.174739	-0.292925	0.769579	0.93909	BET1L
4.12428	0.232035	1.2281	0.188938	0.850141	0.960083	BEX1
442.87	-0.223272	0.226559	-0.985494	0.324381	0.699716	BEX2
0.865651	-0.840123	2.51006	-0.334702	0.73785	NA	BEX4
0	NA	NA	NA	NA	NA	BEX5
4856.61	-0.245225	0.13804	-1.77648	0.0756531	0.318292	BFAR
46.4866	-0.739092	0.44636	-1.65582	0.0977582	0.373892	BFSP1
0	NA	NA	NA	NA	NA	BFSP2
7.45865	-1.50982	0.962099	-1.56929	0.11658	0.415047	BGLAP
0.121099	0.870599	4.08047	0.213357	0.831048	NA	BGN
20.8911	0.30495	0.535875	0.569068	0.56931	0.859746	BHLHA15
0	NA	NA	NA	NA	NA	BHLHA9
273.329	-0.640546	0.329803	-1.94221	0.052112	0.249054	BHLHB9
1.03557	0.794389	2.82556	0.281144	0.7786	NA	BHLHE22
0	NA	NA	NA	NA	NA	BHLHE23
22659.8	0.281294	0.298231	0.943206	0.345576	0.7179	BHLHE40
188.334	5.02645	0.566185	8.87775	6.82238e-19	3.71193e-17	BHLHE41
1.24518	-3.79758	2.58632	-1.46833	0.142014	NA	BHMG1
0.876979	-1.15044	3.11483	-0.369343	0.711872	NA	BHMT
0.12728	-1.05295	4.08047	-0.258047	0.796371	NA	BHMT2
161.365	0.0176182	0.298264	0.0590691	0.952897	0.989414	BICC1
1153.7	0.328893	0.231629	1.41991	0.155633	0.491131	BICD1
2379.16	0.0641755	0.216244	0.296773	0.76664	0.938053	BICD2
1120.85	-0.265032	0.139451	-1.90055	0.0573615	0.265958	BID
31.843	0.364921	0.529246	0.689512	0.490501	0.819225	BIK
775.062	-0.2594	0.21013	-1.23448	0.217026	0.584632	BIN1
0.745106	-0.065804	3.85917	-0.0170513	0.986396	NA	BIN2
989.745	0.143562	0.220724	0.650415	0.515424	0.833587	BIN3
3755.73	0.148595	0.34408	0.431861	0.665843	0.900613	BIRC2
8.49229	1.96717	1.00848	1.95064	0.0511004	0.246279	BIRC3
2880.86	-0.62116	0.33768	-1.83949	0.0658428	0.290931	BIRC5
5109.21	0.148692	0.122808	1.21076	0.225987	0.594847	BIRC6
0	NA	NA	NA	NA	NA	BIRC7
0	NA	NA	NA	NA	NA	BIRC8
1829.36	0.11293	0.173856	0.649563	0.515975	0.833606	BIVM
522.47	0.0151226	0.243637	0.0620701	0.950507	0.988646	BIVM-ERCC5
0	NA	NA	NA	NA	NA	BLACE
3105.04	0.0178782	0.121801	0.146782	0.883304	0.970316	BLCAP
8.22714	-0.215277	0.833201	-0.258373	0.796119	0.945596	BLID
1.97597	-0.830027	2.48821	-0.333584	0.738694	0.928966	BLK
433.194	-0.371021	0.408769	-0.907653	0.364061	0.732443	BLM
3276.61	-0.114564	0.117124	-0.97814	0.328005	0.702913	BLMH
1.34886	-0.0111816	2.23736	-0.0049977	0.996012	NA	BLNK
1724.31	-0.320203	0.179159	-1.78726	0.0738956	0.314622	BLOC1S1
3866	-0.386472	0.237368	-1.62815	0.103492	0.385978	BLOC1S2
569.66	0.145921	0.272424	0.535639	0.592208	0.869158	BLOC1S3
1055.93	-0.212102	0.166436	-1.27438	0.202529	0.564991	BLOC1S4
501.424	0.111793	0.162915	0.686205	0.492584	0.819411	BLOC1S5
39.8613	-1.44688	2.93555	-0.492882	0.622096	0.882814	BLOC1S5-TXNDC5
1968.25	-0.101887	0.2223	-0.458331	0.646715	0.892721	BLOC1S6
1652.2	0.125845	0.149299	0.842911	0.399278	0.759139	BLVRA
5437.9	-0.285893	0.119286	-2.39671	0.0165429	0.106573	BLVRB
1123.09	0.75835	0.23228	3.26481	0.00109538	0.0109305	BLZF1
424.266	-0.302252	0.465219	-0.649699	0.515886	0.833606	BMF
1613.98	-0.197325	0.300309	-0.657074	0.511133	0.830109	BMI1
3347.24	2.89041	0.300951	9.60426	7.67035e-22	4.8496e-20	BMP1
2.62918	1.86094	1.59974	1.16328	0.244717	0.618609	BMP10
4.96444	5.71449	1.67665	3.40827	0.000653762	0.00688451	BMP15
101.826	1.52954	0.491039	3.11491	0.00184002	0.0172627	BMP2
703.523	0.899737	0.365287	2.4631	0.0137742	0.0921507	BMP2K
76.3519	-0.391897	0.471894	-0.830477	0.406269	0.763365	BMP3
659.708	1.42072	0.307253	4.62395	3.76504e-06	5.93355e-05	BMP4
73.2791	-0.911063	0.319591	-2.85072	0.00436208	0.0360041	BMP5
135.217	2.65532	0.583384	4.55158	5.32446e-06	8.18156e-05	BMP6
813.65	-0.204464	0.211662	-0.965994	0.334047	0.708857	BMP7
147.467	-0.56632	0.32177	-1.76002	0.0784047	0.326266	BMP8A
645.78	0.171149	0.218008	0.785061	0.432418	0.779727	BMP8B
23.6958	2.08722	0.614119	3.39872	0.000677017	0.00709205	BMPER
2517.06	-0.138359	0.280996	-0.492386	0.622447	0.882903	BMPR1A
6846.55	-0.243656	0.230616	-1.05654	0.290721	0.667701	BMPR1B
4335.53	-0.0592203	0.151215	-0.391629	0.695332	0.912626	BMPR2
4893.64	-0.0199494	0.13585	-0.146848	0.883252	0.970316	BMS1
7.09347	2.19288	1.07528	2.03936	0.0414145	0.21267	BMX
87.0053	0.325079	0.721395	0.450625	0.65226	0.895097	BNC1
64.0511	2.2237	0.690064	3.22245	0.00127098	0.0124575	BNC2
1138.92	-0.157007	0.250725	-0.626213	0.531175	0.842433	BNIP1
2434.71	0.0637326	0.255036	0.249896	0.802667	0.946933	BNIP2
2758.4	-0.0444301	0.262803	-0.169062	0.865748	0.96438	BNIP3
1952.39	0.760212	0.322907	2.35427	0.0185589	0.115976	BNIP3L
11.5333	0.156291	0.901624	0.173344	0.862381	0.96319	BNIPL
17.0729	1.48009	0.764045	1.93718	0.0527239	0.2508	BOC
4428.66	-0.191172	0.130434	-1.46566	0.14274	0.467437	BOD1
3589.46	0.0451477	0.15301	0.295064	0.767945	0.938621	BOD1L1
0.510006	2.4058	3.44197	0.698961	0.484576	NA	BOD1L2
1973.14	-0.173915	0.122177	-1.42348	0.154598	0.489812	BOK
605.513	-0.214421	0.311245	-0.688913	0.490878	0.819309	BOLA1
1655.11	-0.749014	0.241667	-3.09937	0.00193933	0.0180884	BOLA2
2441.21	-0.478104	0.212033	-2.25486	0.0241423	0.14105	BOLA2B
1291.71	-0.0979392	0.121073	-0.808925	0.418558	0.771788	BOLA3
2.80235	-2.28793	1.58363	-1.44474	0.148532	0.478361	BOLL
5022.49	-0.188205	0.154601	-1.21736	0.223467	0.591993	BOP1
492.336	-0.33305	0.19995	-1.66566	0.0957803	0.369914	BORA
635.908	-0.0828323	0.170585	-0.485577	0.627267	0.88528	BORCS5
1071.88	-0.428301	0.173651	-2.46644	0.0136462	0.0914856	BORCS6
490.529	0.0472521	0.201955	0.233973	0.815006	0.951162	BORCS7
15.0886	1.343	1.13166	1.18676	0.235324	0.607233	BORCS7-ASMT
737.796	-0.2935	0.192194	-1.5271	0.126736	0.435315	BORCS8
381.641	0.182058	0.185562	0.981119	0.326534	0.701762	BORCS8-MEF2B
22402.5	-0.289424	0.124185	-2.3306	0.0197746	0.121753	BPGM
818.233	-0.167925	0.137791	-1.21869	0.22296	0.59147	BPHL
0.612737	2.66128	3.97996	0.66867	0.503706	NA	BPI
0.12728	-1.05295	4.08047	-0.258047	0.796371	NA	BPIFA1
5.84602	4.95164	1.60328	3.08844	0.00201213	0.0186369	BPIFA2
0	NA	NA	NA	NA	NA	BPIFA3
2.41744	4.67314	2.02365	2.30926	0.020929	0.127051	BPIFB1
0.249661	0.870599	4.08047	0.213357	0.831048	NA	BPIFB2
0	NA	NA	NA	NA	NA	BPIFB3
0.260302	1.6062	4.04281	0.397298	0.691148	NA	BPIFB4
0	NA	NA	NA	NA	NA	BPIFB6
0.399962	-0.742334	4.06296	-0.182707	0.855028	NA	BPIFC
946.709	-0.116937	0.201615	-0.58	0.561915	0.856525	BPNT1
4586.72	0.12743	0.171164	0.744487	0.456582	0.795331	BPTF
0	NA	NA	NA	NA	NA	BPY2
0	NA	NA	NA	NA	NA	BPY2B
0	NA	NA	NA	NA	NA	BPY2C
1341.32	0.00414749	0.233135	0.01779	0.985806	0.996963	BRAF
1166.48	0.042061	0.241995	0.17381	0.862015	0.96319	BRAP
3665.15	-0.242323	0.130268	-1.8602	0.0628577	0.282595	BRAT1
1254.96	-0.190887	0.408193	-0.46764	0.640042	0.890657	BRCA1
488.635	0.1864	0.398664	0.467563	0.640097	0.890657	BRCA2
922.856	-0.115071	0.153017	-0.752015	0.452042	0.792596	BRCC3
1895.08	0.0528247	0.19296	0.27376	0.784269	0.942325	BRD1
19030.3	0.168101	0.168655	0.996712	0.318904	0.694604	BRD2
1655.45	0.253718	0.309186	0.820601	0.411874	0.766441	BRD3
5887.9	-0.0344506	0.161151	-0.213778	0.83072	0.955848	BRD4
3995.82	0.0892406	0.159881	0.558168	0.57673	0.863261	BRD7
3538.18	-0.148654	0.172778	-0.860378	0.389581	0.75173	BRD8
3941.4	0.00590221	0.155438	0.0379716	0.96971	0.992669	BRD9
0.139281	0.870599	4.08047	0.213357	0.831048	NA	BRDT
1297.46	0.129165	0.161185	0.801349	0.42293	0.773625	BRE
2700.32	-0.137665	0.127293	-1.08148	0.279484	0.655814	BRF1
1181.68	-0.166558	0.214608	-0.776105	0.437687	0.78302	BRF2
2276.07	0.375208	0.218747	1.71526	0.0862972	0.347973	BRI3
11578.6	-0.708966	0.221667	-3.19834	0.00138221	0.0134407	BRI3BP
88.8978	0.511094	0.380939	1.34167	0.179704	0.53134	BRICD5
32.8936	-0.242737	0.44003	-0.551637	0.581197	0.86483	BRINP1
16.2447	-0.205999	0.828045	-0.248777	0.803533	0.946986	BRINP2
129.066	-0.11996	0.568115	-0.211154	0.832767	0.956461	BRINP3
464.931	-0.0358851	0.268948	-0.133427	0.893855	0.972567	BRIP1
2931.33	-0.110929	0.210307	-0.527459	0.597875	0.872434	BRIX1
6610.45	-0.231382	0.117489	-1.96939	0.0489084	0.239087	BRK1
2226.03	-0.0445649	0.152451	-0.292323	0.770039	0.93909	BRMS1
500.402	-0.155964	0.164579	-0.947659	0.343303	0.716007	BRMS1L
816.925	-0.177864	0.220009	-0.808437	0.418839	0.771949	BROX
2265.93	-0.0813867	0.309184	-0.263231	0.792373	0.944975	BRPF1
2577.51	0.246826	0.212103	1.16371	0.244542	0.618609	BRPF3
0.278561	1.67229	4.03923	0.414012	0.678866	NA	BRS3
1841.65	-0.0465366	0.195415	-0.238143	0.811771	0.949994	BRSK1
1198.51	-0.203148	0.141814	-1.4325	0.152001	0.48502	BRSK2
1793.24	0.0114168	0.148203	0.0770348	0.938596	0.9855	BRWD1
1202.08	-0.301963	0.202116	-1.49401	0.135174	0.453016	BRWD3
532.879	-0.325497	0.209373	-1.55463	0.120034	0.421716	BSCL2
4830.87	0.0621162	0.140454	0.442253	0.658306	0.897438	BSDC1
25983.4	-0.0107828	0.10553	-0.102178	0.918615	0.979505	BSG
645.162	0.0867719	0.143722	0.603749	0.54601	0.850224	BSN
3.77285	4.29374	1.7396	2.46824	0.0135781	0.0911054	BSND
0	NA	NA	NA	NA	NA	BSPH1
4.38653	0.135358	1.09868	0.1232	0.901948	0.974135	BSPRY
6.12198	0.872679	0.979773	0.890694	0.373093	0.738449	BST1
901.344	9.62351	0.685114	14.0466	8.08558e-45	1.63718e-42	BST2
0.590525	-2.71368	3.98579	-0.680837	0.495975	NA	BSX
3293.35	0.200522	0.134804	1.48751	0.13688	0.455963	BTAF1
4321.09	-0.154514	0.156049	-0.990159	0.322096	0.697349	BTBD1
1743.01	0.069605	0.135887	0.512226	0.608493	0.877893	BTBD10
117.873	4.43541	0.555785	7.98044	1.45808e-15	6.26976e-14	BTBD11
1.63647	1.69023	2.63637	0.64112	0.521445	NA	BTBD16
0.976649	3.37171	3.49849	0.963761	0.335166	NA	BTBD17
1.46943	0.153629	1.94149	0.0791294	0.93693	NA	BTBD18
34.068	0.538167	0.711465	0.75642	0.449397	0.791169	BTBD19
5130.14	-0.0903294	0.191694	-0.471217	0.637486	0.890366	BTBD2
1703.42	0.210881	0.230927	0.913192	0.361141	0.72958	BTBD3
960.215	-0.14348	0.179297	-0.800238	0.423573	0.773986	BTBD6
1651.49	-0.175758	0.192941	-0.910939	0.362327	0.730961	BTBD7
28.3627	-0.288634	0.514723	-0.560755	0.574964	0.862223	BTBD8
1200.81	-0.0302197	0.159952	-0.18893	0.850148	0.960083	BTBD9
158.737	0.196294	0.33053	0.593876	0.552595	0.854986	BTC
206.893	0.166694	0.295065	0.564941	0.572114	0.861159	BTD
31051.7	-0.26489	0.163504	-1.62009	0.105214	0.390578	BTF3
3961.05	-0.100678	0.136408	-0.738065	0.460475	0.798197	BTF3L4
905.762	0.820191	0.305418	2.68547	0.0072428	0.0552281	BTG1
[truncated: 17,900 more rows]
