# Supplementary material for: Re-expression of SMARCA4/BRG1 in small cell carcinoma of ovary, hypercalcemic type (SCCOHT) promotes an epithelial-like gene signature through an AP-1-dependent mechanism
Source: eLife. 2020 Dec 23;9:e59073. doi: 10.7554/eLife.59073 (PMC7813545; doi:10.7554/eLife.59073)
Supplement: Supplementary file 5. — A. ATAC sites gained following expression of BRG1. B. ATAC sites that overlap a Fra1 motif, used to identify protein localization relative to motif location. [file elife-59073-supp5.xlsx]

## Sheet: A. Gained ATAC sites -BIN67
chr1	4395209	4395890	.
chr1	5611729	5612277	.
chr1	7401869	7402385	.
chr1	7471011	7471219	.
chr1	9766746	9767283	.
chr1	12851795	12852182	.
chr1	13524109	13524443	.
chr1	14742315	14742971	.
chr1	15028083	15028467	.
chr1	15799959	15800469	.
chr1	16145230	16145408	.
chr1	20411334	20411525	.
chr1	21324520	21324841	.
chr1	21764770	21765337	.
chr1	22831865	22832512	.
chr1	23196872	23197084	.
chr1	24266376	24266993	.
chr1	24683731	24683977	.
chr1	26771612	26771964	.
chr1	26849398	26849667	.
chr1	27671829	27672688	.
chr1	28129297	28129485	.
chr1	29570124	29570349	.
chr1	30523106	30523350	.
chr1	31170846	31171083	.
chr1	33985599	33986171	.
chr1	34199831	34200251	.
chr1	34763567	34763754	.
chr1	37499250	37499458	.
chr1	38138639	38138944	.
chr1	40967425	40967923	.
chr1	41955632	41955874	.
chr1	42941189	42941475	.
chr1	43582282	43582519	.
chr1	44327735	44328243	.
chr1	44807321	44807545	.
chr1	46757268	46757989	.
chr1	47569843	47570099	.
chr1	47894759	47895096	.
chr1	48052512	48052857	.
chr1	48223317	48223501	.
chr1	48494292	48494679	.
chr1	51063207	51063468	.
chr1	51261375	51261667	.
chr1	51558343	51558908	.
chr1	54037656	54037902	.
chr1	54158026	54158276	.
chr1	54581716	54581935	.
chr1	54935011	54935198	.
chr1	55428964	55429618	.
chr1	55572945	55573424	.
chr1	56676807	56677025	.
chr1	56688506	56688997	.
chr1	57658625	57658817	.
chr1	58041391	58041923	.
chr1	58411996	58412492	.
chr1	58618361	58618549	.
chr1	58727316	58727761	.
chr1	58755371	58755751	.
chr1	58762933	58763402	.
chr1	58848796	58849374	.
chr1	59128429	59128665	.
chr1	59128842	59129054	.
chr1	59151072	59151616	.
chr1	59502318	59502697	.
chr1	59738733	59739018	.
chr1	62230684	62231113	.
chr1	62622052	62622245	.
chr1	63920524	63921097	.
chr1	64343270	64344170	.
chr1	64517182	64517452	.
chr1	64897996	64898798	.
chr1	64917277	64918008	.
chr1	65425774	65426057	.
chr1	65467592	65467875	.
chr1	66543466	66543740	.
chr1	66944612	66945134	.
chr1	67570304	67571031	.
chr1	67626594	67627012	.
chr1	67646790	67647337	.
chr1	67725011	67725226	.
chr1	68301416	68302304	.
chr1	68378428	68378803	.
chr1	68384238	68385280	.
chr1	69055292	69055842	.
chr1	71086374	71086656	.
chr1	74693559	74693755	.
chr1	75672637	75673268	.
chr1	77039823	77040049	.
chr1	77322154	77322651	.
chr1	77539332	77540033	.
chr1	77605152	77605891	.
chr1	78101639	78101847	.
chr1	80375700	80375884	.
chr1	81174833	81175338	.
chr1	81179293	81179520	.
chr1	81990472	81990812	.
chr1	84089487	84089707	.
chr1	84103467	84103859	.
chr1	84253942	84254255	.
chr1	84365342	84366109	.
chr1	84834233	84834801	.
chr1	84847328	84847531	.
chr1	85329040	85329315	.
chr1	85495539	85495941	.
chr1	85550718	85551679	.
chr1	85607057	85607612	.
chr1	85611976	85612209	.
chr1	85622720	85623415	.
chr1	86422026	86422257	.
chr1	86792814	86793537	.
chr1	87140883	87141121	.
chr1	87224269	87224671	.
chr1	87226172	87226677	.
chr1	87392365	87392664	.
chr1	87398788	87399804	.
chr1	87956118	87956319	.
chr1	88773652	88774780	.
chr1	88984948	88985906	.
chr1	89546375	89546760	.
chr1	89605960	89606393	.
chr1	89808523	89808904	.
chr1	89910841	89911122	.
chr1	89953112	89953523	.
chr1	89974930	89975381	.
chr1	90403193	90403444	.
chr1	91120943	91121707	.
chr1	91609550	91610068	.
chr1	91650772	91651088	.
chr1	91736818	91737486	.
chr1	92792374	92792598	.
chr1	93701666	93702037	.
chr1	93754262	93754746	.
chr1	93779636	93779975	.
chr1	94325467	94326077	.
chr1	94622864	94623332	.
chr1	94709979	94710590	.
chr1	95197786	95198215	.
chr1	96362612	96362937	.
chr1	97094238	97094730	.
chr1	97192900	97193381	.
chr1	100622085	100622645	.
chr1	104195512	104195844	.
chr1	107530667	107530890	.
chr1	109197404	109197701	.
chr1	111592502	111593224	.
chr1	115062703	115063001	.
chr1	115545680	115546375	.
chr1	116508784	116509573	.
chr1	117077341	117077731	.
chr1	117821665	117821988	.
chr1	118963556	118963910	.
chr1	119279504	119279815	.
chr1	119364710	119364912	.
chr1	119453078	119453559	.
chr1	147292860	147293209	.
chr1	147780988	147781435	.
chr1	151311608	151311812	.
chr1	151547163	151547690	.
chr1	151988636	151988966	.
chr1	151998565	151999170	.
chr1	152047801	152048455	.
chr1	152186975	152187203	.
chr1	152906085	152906484	.
chr1	153100189	153100561	.
chr1	153533755	153534225	.
chr1	153566438	153566963	.
chr1	155763374	155763738	.
chr1	155983593	155984026	.
chr1	156896776	156897318	.
chr1	157390727	157390987	.
chr1	157961901	157962757	.
chr1	159009675	159010032	.
chr1	159493067	159493738	.
chr1	159881935	159882225	.
chr1	159916299	159916786	.
chr1	159960723	159961183	.
chr1	160124808	160125144	.
chr1	160206486	160206704	.
chr1	160837986	160838195	.
chr1	161083326	161083711	.
chr1	162538893	162539413	.
chr1	162541825	162542128	.
chr1	162856228	162856572	.
chr1	164611828	164612146	.
chr1	164637671	164638180	.
chr1	164772714	164772993	.
chr1	165116580	165117188	.
chr1	165287379	165287574	.
chr1	165383168	165383399	.
chr1	165482080	165482456	.
chr1	165539421	165539779	.
chr1	165898820	165899138	.
chr1	166905990	166906355	.
chr1	166952186	166952760	.
chr1	167161316	167161594	.
chr1	168112864	168113427	.
chr1	168127648	168127856	.
chr1	168301687	168302116	.
chr1	168628863	168629191	.
chr1	169059552	169060316	.
chr1	169529300	169529693	.
chr1	170563057	170563422	.
chr1	171438484	171438833	.
chr1	171661803	171661982	.
chr1	171817568	171818182	.
chr1	171877818	171878024	.
chr1	172917935	172918344	.
chr1	173269554	173270076	.
chr1	173506640	173508037	.
chr1	175169348	175169759	.
chr1	175197633	175197892	.
chr1	175520213	175520609	.
chr1	176241398	176241669	.
chr1	176515280	176515567	.
chr1	176517542	176517809	.
chr1	176656398	176656612	.
chr1	176865991	176866320	.
chr1	177209344	177209647	.
chr1	178126427	178127157	.
chr1	178238645	178239382	.
chr1	178417962	178418179	.
chr1	178530103	178530447	.
chr1	178536926	178537337	.
chr1	179164527	179164866	.
chr1	180167944	180168320	.
chr1	181112528	181113119	.
chr1	181251145	181251447	.
chr1	181255636	181255907	.
chr1	181743934	181744362	.
chr1	182101437	182101725	.
chr1	182186449	182187038	.
chr1	182507721	182507977	.
chr1	183060422	183060943	.
chr1	183272343	183272863	.
chr1	183287392	183287624	.
chr1	185441666	185442307	.
chr1	186236905	186237225	.
chr1	188027280	188027985	.
chr1	192766253	192766522	.
chr1	193115731	193115966	.
chr1	193655385	193655606	.
chr1	198018510	198019390	.
chr1	198120943	198121677	.
chr1	198220276	198220795	.
chr1	198443430	198443742	.
chr1	199272243	199273000	.
chr1	199685436	199685668	.
chr1	200076248	200076444	.
chr1	200379422	200379698	.
chr1	200483523	200483758	.
chr1	200734027	200734212	.
chr1	201176897	201177198	.
chr1	201275276	201275559	.
chr1	201311269	201311527	.
chr1	201461064	201462077	.
chr1	201696325	201696640	.
chr1	201714722	201714961	.
chr1	202589029	202589560	.
chr1	203558363	203558704	.
chr1	203663275	203663562	.
chr1	203692702	203693392	.
chr1	205783865	205784427	.
chr1	206021045	206021991	.
chr1	206419419	206420048	.
chr1	207007248	207007638	.
chr1	207393729	207393966	.
chr1	208107792	208108317	.
chr1	208179467	208179717	.
chr1	208184448	208184703	.
chr1	208201162	208201506	.
chr1	208203272	208203674	.
chr1	209409912	209410102	.
chr1	209542642	209542907	.
chr1	209808074	209808424	.
chr1	209839938	209840350	.
chr1	209873535	209873711	.
chr1	209884481	209884978	.
chr1	209900480	209901007	.
chr1	210188244	210188665	.
chr1	210438936	210439550	.
chr1	210597737	210598631	.
chr1	210882670	210883446	.
chr1	211036572	211037426	.
chr1	211305149	211305493	.
chr1	211371468	211371903	.
chr1	212179559	212180006	.
chr1	212234767	212234973	.
chr1	212260802	212261624	.
chr1	212485863	212486260	.
chr1	212513078	212513413	.
chr1	212596065	212596599	.
chr1	212816878	212817251	.
chr1	213123483	213123982	.
chr1	214212854	214213446	.
chr1	214404728	214405208	.
chr1	215113943	215114532	.
chr1	215583414	215583590	.
chr1	218377171	218377693	.
chr1	218380492	218380789	.
chr1	218459644	218460563	.
chr1	218479892	218480485	.
chr1	218496673	218496935	.
chr1	218585608	218586194	.
chr1	218674359	218674700	.
chr1	218705975	218706521	.
chr1	219304379	219305105	.
chr1	219771083	219771409	.
chr1	220300520	220301021	.
chr1	220326364	220326802	.
chr1	220370412	220370778	.
chr1	220430083	220430360	.
chr1	220487318	220487737	.
chr1	220843750	220844014	.
chr1	221439496	221440390	.
chr1	221823836	221824383	.
chr1	221839935	221840761	.
chr1	221845988	221846287	.
chr1	221886892	221887463	.
chr1	221958199	221958506	.
chr1	222085113	222085330	.
chr1	222582172	222582435	.
chr1	222817636	222817987	.
chr1	223500548	223500895	.
chr1	223700982	223701543	.
chr1	223707253	223707779	.
chr1	223776154	223776598	.
chr1	224498502	224498741	.
chr1	224542894	224543102	.
chr1	225735634	225736744	.
chr1	225755204	225755805	.
chr1	226778794	226778996	.
chr1	227805779	227806141	.
chr1	227934794	227935191	.
chr1	228809820	228810185	.
chr1	228838359	228838876	.
chr1	228861195	228861505	.
chr1	230104722	230105170	.
chr1	230827238	230827548	.
chr1	230851355	230851582	.
chr1	231828229	231828473	.
chr1	232142474	232143243	.
chr1	233112969	233113414	.
chr1	233707445	233707804	.
chr1	234533167	234533402	.
chr1	234564412	234565094	.
chr1	234631804	234632130	.
chr1	234723825	234724862	.
chr1	234925854	234926260	.
chr1	234997298	234997614	.
chr1	235017957	235018656	.
chr1	235067526	235068613	.
chr1	235404303	235404564	.
chr1	235910422	235910916	.
chr1	235920284	235920657	.
chr1	236507366	236507591	.
chr1	236534153	236534595	.
chr1	236980600	236980785	.
chr1	237098486	237098816	.
chr1	237199168	237199347	.
chr1	237873532	237873859	.
chr1	239814331	239814861	.
chr1	241582897	241583351	.
chr1	241591486	241591931	.
chr1	241592221	241592494	.
chr1	241828724	241829056	.
chr1	242005193	242005471	.
chr1	242322065	242322310	.
chr1	242530831	242531037	.
chr1	242824499	242824883	.
chr1	243719047	243719265	.
chr1	243798800	243799002	.
chr1	244104392	244104594	.
chr1	244163858	244164507	.
chr1	244273650	244274327	.
chr1	244302973	244303308	.
chr1	244614960	244615529	.
chr1	245091900	245092176	.
chr1	245380200	245380428	.
chr1	245715981	245716465	.
chr1	245787971	245788564	.
chr1	245875023	245875633	.
chr1	246139800	246140130	.
chr1	246632563	246632776	.
chr1	247528893	247529501	.
chr1	247906406	247906862	.
chr1	248821156	248821488	.
chr10	297312	297627	.
chr10	1289835	1290272	.
chr10	2111920	2112531	.
chr10	2949971	2950237	.
chr10	3500486	3500757	.
chr10	3754927	3755914	.
chr10	3810136	3810327	.
chr10	3852349	3852652	.
chr10	5317664	5318069	.
chr10	5466482	5466729	.
chr10	5584972	5585292	.
chr10	5944486	5944683	.
chr10	6275224	6275589	.
chr10	6779113	6779289	.
chr10	8366250	8366488	.
chr10	8369562	8369959	.
chr10	10831236	10831479	.
chr10	11101124	11101489	.
chr10	11552145	11552550	.
chr10	11875848	11876148	.
chr10	11881635	11882346	.
chr10	12720378	12720691	.
chr10	13882186	13882599	.
chr10	15200731	15200957	.
chr10	16381189	16381464	.
chr10	17023551	17023810	.
chr10	17062801	17063385	.
chr10	17348805	17349042	.
chr10	17512439	17512981	.
chr10	17835602	17836204	.
chr10	17923889	17924286	.
chr10	18610535	18610780	.
chr10	18713150	18713416	.
chr10	19592375	19592557	.
chr10	21194666	21194965	.
chr10	21335040	21335301	.
chr10	22427952	22428382	.
chr10	22620311	22620862	.
chr10	22816358	22817193	.
chr10	22823154	22823487	.
chr10	24483553	24483976	.
chr10	24820661	24820864	.
chr10	24962995	24963268	.
chr10	25060143	25060334	.
chr10	25062274	25062810	.
chr10	25493146	25493469	.
chr10	26780910	26781543	.
chr10	27192357	27192653	.
chr10	28991448	28991924	.
chr10	29160020	29160658	.
chr10	29658950	29659522	.
chr10	32139446	32139717	.
chr10	32413471	32413871	.
chr10	33134021	33134392	.
chr10	33237903	33238439	.
chr10	35040763	35041445	.
chr10	35372382	35372652	.
chr10	35421460	35421997	.
chr10	35546900	35547479	.
chr10	37380096	37380382	.
chr10	37489083	37489507	.
chr10	37535806	37536711	.
chr10	38143738	38143988	.
chr10	39455122	39455302	.
chr10	42187636	42188235	.
chr10	43137812	43138715	.
chr10	43863923	43864297	.
chr10	44051711	44052000	.
chr10	44300898	44301602	.
chr10	44510839	44511030	.
chr10	44935663	44935960	.
chr10	44981314	44981716	.
chr10	47406859	47407140	.
chr10	50576413	50576759	.
chr10	51833105	51833349	.
chr10	52443463	52443846	.
chr10	58157462	58157719	.
chr10	58856327	58857138	.
chr10	59387858	59388513	.
chr10	59595693	59595875	.
chr10	59678939	59679324	.
chr10	59965325	59965847	.
chr10	60123330	60123963	.
chr10	60611366	60611841	.
chr10	61028754	61029360	.
chr10	62916371	62916630	.
chr10	63700230	63700504	.
chr10	63712020	63712781	.
chr10	63799081	63799439	.
chr10	67602334	67602700	.
chr10	68097122	68097425	.
chr10	68135962	68136581	.
chr10	68153542	68153879	.
chr10	69728398	69728733	.
chr10	69864482	69864681	.
chr10	71766801	71767373	.
chr10	71838338	71838778	.
chr10	75358566	75359444	.
chr10	75547423	75547610	.
chr10	77160389	77160954	.
chr10	77163928	77164230	.
chr10	77350727	77350986	.
chr10	77531431	77531857	.
chr10	78256139	78256434	.
chr10	79150078	79150366	.
chr10	79184265	79184726	.
chr10	80196166	80196844	.
chr10	80471767	80471955	.
chr10	82982206	82982574	.
chr10	83983626	83983978	.
chr10	84269662	84270143	.
chr10	85642532	85643290	.
chr10	85643934	85644127	.
chr10	86224904	86225393	.
chr10	86254141	86254794	.
chr10	86345930	86346400	.
chr10	86361292	86361497	.
chr10	86441316	86441824	.
chr10	87635746	87636277	.
chr10	89022800	89023152	.
chr10	89374191	89374726	.
chr10	89553336	89553769	.
chr10	89921122	89921801	.
chr10	90319156	90319809	.
chr10	93335015	93335258	.
chr10	93445641	93445894	.
chr10	93475477	93476184	.
chr10	94042170	94042662	.
chr10	94673490	94674351	.
chr10	95201872	95202053	.
chr10	95229722	95230018	.
chr10	95266796	95266985	.
chr10	95308601	95309138	.
chr10	95814083	95814298	.
chr10	95818550	95818925	.
chr10	97882356	97882714	.
chr10	98269459	98269785	.
chr10	98302811	98303221	.
chr10	98323296	98323549	.
chr10	98460901	98461275	.
chr10	99339035	99339722	.
chr10	99395821	99396264	.
chr10	103273057	103273375	.
chr10	103872287	103872535	.
chr10	103908088	103908567	.
chr10	104329224	104330073	.
chr10	104445416	104445712	.
chr10	104589377	104590133	.
chr10	104809298	104809867	.
chr10	104937581	104937917	.
chr10	110323551	110323784	.
chr10	110336247	110336596	.
chr10	110706532	110706961	.
chr10	110774082	110774423	.
chr10	112218933	112219207	.
chr10	112383238	112383640	.
chr10	112717119	112717339	.
chr10	112811835	112812173	.
chr10	112815685	112815872	.
chr10	112919765	112919983	.
chr10	113073768	113074081	.
chr10	113087256	113087784	.
chr10	114026587	114026953	.
chr10	114271563	114272202	.
chr10	114306613	114306845	.
chr10	114505091	114505493	.
chr10	114633165	114633667	.
chr10	116113989	116114474	.
chr10	116538344	116538734	.
chr10	117078187	117078472	.
chr10	117221332	117221570	.
chr10	117457293	117457741	.
chr10	117461815	117462391	.
chr10	117609033	117609383	.
chr10	117736590	117737227	.
chr10	118504602	118504834	.
chr10	118798186	118798556	.
chr10	119190190	119190632	.
chr10	119316950	119317346	.
chr10	119667772	119668039	.
chr10	124864515	124864721	.
chr10	125585040	125585336	.
chr10	126398188	126398442	.
chr10	131635753	131636101	.
chr10	131888350	131888533	.
chr11	834897	835124	.
chr11	5280699	5280913	.
chr11	5621142	5621690	.
chr11	5922999	5923773	.
chr11	6431930	6432222	.
chr11	7600454	7600683	.
chr11	7605569	7605884	.
chr11	7668553	7669204	.
chr11	8068673	8069135	.
chr11	8234184	8234516	.
chr11	8328872	8329270	.
chr11	8652169	8652373	.
chr11	8732838	8733035	.
chr11	9566043	9566394	.
chr11	10490674	10491168	.
chr11	11148150	11148413	.
chr11	12182720	12183102	.
chr11	12802692	12802907	.
chr11	13216179	13216954	.
chr11	13923528	13924276	.
chr11	14015700	14016071	.
chr11	14337096	14337370	.
chr11	14422384	14423035	.
chr11	14980824	14981729	.
chr11	15053224	15053712	.
chr11	15412079	15412287	.
chr11	15695209	15695518	.
chr11	16669804	16670135	.
chr11	16791592	16791771	.
chr11	16981477	16981909	.
chr11	18383593	18384490	.
chr11	19028018	19028626	.
chr11	19276971	19277718	.
chr11	19442220	19442683	.
chr11	19679976	19680593	.
chr11	19890259	19890979	.
chr11	19919258	19919524	.
chr11	19934971	19935808	.
chr11	19988588	19989306	.
chr11	19995194	19995432	.
chr11	20035788	20036049	.
chr11	20112215	20112753	.
chr11	22792558	22792954	.
chr11	27209543	27209895	.
chr11	27796126	27796837	.
chr11	27934013	27935049	.
chr11	32081090	32081610	.
chr11	32088175	32088469	.
chr11	32118579	32118930	.
chr11	33557383	33557671	.
chr11	33690367	33690917	.
chr11	34204969	34205432	.
chr11	34302483	34302834	.
chr11	34632072	34632872	.
chr11	35083645	35084090	.
chr11	35364094	35364332	.
chr11	35530281	35530729	.
chr11	35630055	35630236	.
chr11	36149638	36150306	.
chr11	36431893	36432083	.
chr11	36500360	36500730	.
chr11	37503981	37504524	.
chr11	39668766	39668944	.
chr11	40329266	40329577	.
chr11	43830936	43831303	.
chr11	43920725	43921227	.
chr11	44862419	44862847	.
chr11	45089290	45089758	.
chr11	45736528	45736765	.
chr11	47924254	47924643	.
chr11	48141420	48141766	.
chr11	56932901	56933122	.
chr11	57072096	57073365	.
chr11	57293001	57293545	.
chr11	57311166	57311630	.
chr11	57599498	57599733	.
chr11	57901583	57901935	.
chr11	58061265	58062280	.
chr11	58688730	58689085	.
chr11	59706921	59707214	.
chr11	59786980	59787370	.
chr11	59857446	59857893	.
chr11	61153472	61153720	.
chr11	61297756	61298049	.
chr11	62242089	62242375	.
chr11	63567138	63567610	.
chr11	63802752	63803365	.
chr11	65381952	65382587	.
chr11	67354611	67354823	.
chr11	69497257	69497560	.
chr11	70233525	70233760	.
chr11	73257418	73257672	.
chr11	73494284	73494506	.
chr11	73570493	73570693	.
chr11	73956229	73956459	.
chr11	76291569	76291851	.
chr11	77299565	77299802	.
chr11	78715644	78716054	.
chr11	79018456	79018813	.
chr11	79419248	79419432	.
chr11	79431590	79432004	.
chr11	82980400	82980744	.
chr11	83051876	83052335	.
chr11	83257876	83258119	.
chr11	83272619	83272887	.
chr11	83444536	83444961	.
chr11	85718874	85719487	.
chr11	85844478	85844885	.
chr11	86174064	86174770	.
chr11	86484172	86484546	.
chr11	86578083	86578471	.
chr11	86588584	86588923	.
chr11	86592835	86593057	.
chr11	86632725	86633134	.
chr11	86743489	86743760	.
chr11	86811785	86812201	.
chr11	88535990	88536272	.
chr11	88554835	88555487	.
chr11	89481939	89482180	.
chr11	91982104	91982362	.
chr11	93054908	93055366	.
chr11	93577406	93577637	.
chr11	93842363	93842693	.
chr11	93908673	93909040	.
chr11	93986730	93987110	.
chr11	94018615	94018856	.
chr11	94117969	94118381	.
chr11	94152132	94152680	.
chr11	94737248	94737789	.
chr11	94746702	94746987	.
chr11	94794471	94794935	.
chr11	95149698	95149954	.
chr11	95453706	95454303	.
chr11	96155666	96156504	.
chr11	96487426	96487790	.
chr11	98394607	98395301	.
chr11	100445244	100445692	.
chr11	100562175	100562364	.
chr11	100578888	100579371	.
chr11	100776221	100776674	.
chr11	100876933	100877114	.
chr11	102305910	102306573	.
chr11	102552221	102553023	.
chr11	102599688	102600187	.
chr11	102603118	102603375	.
chr11	102780509	102780698	.
chr11	103529265	103529651	.
chr11	103541271	103541455	.
chr11	103625223	103625669	.
chr11	103633158	103634068	.
chr11	105936024	105936258	.
chr11	106012730	106013202	.
chr11	106031386	106031778	.
chr11	107043526	107043951	.
chr11	107704594	107705578	.
chr11	107819316	107819936	.
chr11	107840197	107840993	.
chr11	108616443	108616981	.
chr11	108958688	108959118	.
chr11	109033539	109034253	.
chr11	110525714	110526550	.
chr11	111183779	111184309	.
chr11	111911717	111912135	.
chr11	112157200	112157732	.
chr11	112292778	112293256	.
chr11	112613077	112613828	.
chr11	113618448	113618746	.
chr11	113663865	113664276	.
chr11	113690719	113690945	.
chr11	113974825	113975425	.
chr11	114017831	114018071	.
chr11	114197878	114198420	.
chr11	114236880	114237127	.
chr11	114294931	114295401	.
chr11	114354175	114354406	.
chr11	114416382	114416906	.
chr11	115941450	115941879	.
chr11	116366791	116367347	.
chr11	116420880	116421347	.
chr11	116990123	116990387	.
chr11	119361175	119361516	.
chr11	120121953	120122440	.
chr11	120431867	120432382	.
chr11	121236295	121236797	.
chr11	122642486	122642938	.
chr11	122708579	122709238	.
chr11	124898553	124898966	.
chr11	124900346	124900807	.
chr11	125083041	125083379	.
chr11	125300834	125301126	.
chr11	126113669	126113892	.
chr11	126132368	126132672	.
chr11	126373375	126373881	.
chr11	126647721	126648228	.
chr11	126917671	126918035	.
chr11	128207897	128208989	.
chr11	128210384	128210794	.
chr11	128336252	128336833	.
chr11	128467666	128467906	.
chr11	129143270	129143917	.
chr11	129440102	129440345	.
chr11	129639409	129639643	.
chr11	129846557	129847147	.
chr11	130522326	130522716	.
chr11	130580389	130580683	.
chr11	130772487	130772921	.
chr11	130782001	130782579	.
chr11	130908888	130909191	.
chr11	132632669	132633203	.
chr11	133978745	133979149	.
chr11	135069728	135070238	.
chr12	3273449	3273716	.
chr12	5441557	5441760	.
chr12	6093281	6093605	.
chr12	6216034	6216356	.
chr12	10191901	10192187	.
chr12	12819847	12820310	.
chr12	13250430	13250813	.
chr12	13339468	13339940	.
chr12	13727684	13728132	.
chr12	14554265	14554624	.
chr12	14836367	14837044	.
chr12	15978772	15979369	.
chr12	18382930	18383403	.
chr12	19031105	19031334	.
chr12	19273782	19274174	.
chr12	19402930	19403331	.
chr12	22101914	22102343	.
chr12	22275652	22276148	.
chr12	22730204	22730453	.
chr12	22740720	22741272	.
chr12	23084268	23084914	.
chr12	25458118	25458518	.
chr12	25648606	25648832	.
chr12	26135162	26135431	.
chr12	26239447	26239975	.
chr12	27343474	27343943	.
chr12	27966942	27967116	.
chr12	27981943	27982278	.
chr12	29320181	29320971	.
chr12	30896503	30896756	.
chr12	31003055	31003292	.
chr12	31005995	31006332	.
chr12	31749171	31749627	.
chr12	32836838	32837234	.
chr12	39490996	39491210	.
chr12	39852542	39852863	.
chr12	41292933	41293497	.
chr12	42474533	42474744	.
chr12	42756913	42757595	.
chr12	43370170	43370655	.
chr12	43847419	43847923	.
chr12	45273749	45274365	.
chr12	45415431	45415830	.
chr12	46219682	46220636	.
chr12	50786855	50787113	.
chr12	51371435	51371825	.
chr12	52186187	52186365	.
chr12	52230498	52230769	.
chr12	52280255	52281203	.
chr12	54411424	54411716	.
chr12	54935434	54935608	.
chr12	55720938	55721427	.
chr12	57881498	57881872	.
chr12	58425488	58425940	.
chr12	62725025	62725281	.
chr12	62848556	62848829	.
chr12	63294358	63294550	.
chr12	66036428	66036684	.
chr12	67827868	67828342	.
chr12	69897811	69898141	.
chr12	69966532	69967402	.
chr12	70052837	70053357	.
chr12	70645750	70646276	.
chr12	70744239	70744471	.
chr12	71556857	71557314	.
chr12	71581224	71581652	.
chr12	71710165	71710705	.
chr12	71865216	71865642	.
chr12	74889886	74890382	.
chr12	75635662	75636131	.
chr12	75954032	75954433	.
chr12	75977859	75978495	.
chr12	76719514	76720352	.
chr12	77122358	77122630	.
chr12	79424181	79424540	.
chr12	79452081	79452301	.
chr12	79547172	79548247	.
chr12	79844722	79845005	.
chr12	79897604	79898008	.
chr12	80269025	80269603	.
chr12	81668576	81668791	.
chr12	82425239	82425485	.
chr12	82650648	82650992	.
chr12	82665301	82665746	.
chr12	86712468	86712732	.
chr12	88298834	88299141	.
chr12	88325163	88325371	.
chr12	88946489	88946926	.
chr12	91406949	91407308	.
chr12	91779081	91779325	.
chr12	92080463	92080816	.
chr12	92759710	92760177	.
chr12	92898933	92899946	.
chr12	92971913	92972407	.
chr12	93137907	93138302	.
chr12	93198158	93198583	.
chr12	93563850	93564100	.
chr12	94941531	94942036	.
chr12	95605169	95605551	.
chr12	95764105	95764293	.
chr12	95805808	95806589	.
chr12	96073257	96073781	.
chr12	96427391	96427655	.
chr12	96810617	96811405	.
chr12	96889665	96889853	.
chr12	98352491	98353327	.
chr12	98418483	98419049	.
chr12	98475252	98475623	.
chr12	98635976	98636352	.
chr12	99278947	99279279	.
chr12	99455345	99455909	.
chr12	100359511	100360087	.
chr12	100706102	100706589	.
chr12	101018680	101018857	.
chr12	101052160	101052374	.
chr12	101459937	101460158	.
chr12	101862313	101862589	.
chr12	101894659	101895105	.
chr12	102406070	102406320	.
chr12	102427048	102427676	.
chr12	103401497	103401676	.
chr12	103560626	103561247	.
chr12	103802063	103802732	.
chr12	104671831	104672062	.
chr12	107515391	107515809	.
chr12	108838229	108838735	.
chr12	115354116	115354559	.
chr12	115541932	115542331	.
chr12	117487278	117487634	.
chr12	117699256	117699913	.
chr12	118052543	118052802	.
chr12	119176380	119176678	.
chr12	119940979	119941224	.
chr12	120257167	120257448	.
chr12	121038864	121039226	.
chr12	121124491	121124840	.
chr12	123141654	123142192	.
chr12	123995134	123995528	.
chr12	124838220	124838684	.
chr12	126051630	126052074	.
chr12	127125721	127126719	.
chr12	127284964	127285388	.
chr12	127547852	127548391	.
chr12	128727831	128728245	.
chr12	128729717	128730052	.
chr12	130133242	130133509	.
chr12	131111977	131112424	.
chr13	20420019	20420229	.
chr13	21528670	21528953	.
chr13	23321467	23322224	.
chr13	23427403	23427775	.
chr13	23621213	23621640	.
chr13	23790747	23791122	.
chr13	23956227	23956421	.
chr13	24148867	24149073	.
chr13	26459368	26459751	.
chr13	27195226	27195523	.
chr13	29923765	29924322	.
chr13	30743641	30743948	.
chr13	31945647	31945835	.
chr13	33126254	33126443	.
chr13	33633976	33634361	.
chr13	34156928	34157369	.
chr13	35923296	35923802	.
chr13	35927501	35927936	.
chr13	36445604	36446353	.
chr13	36533747	36534304	.
chr13	37656383	37657281	.
chr13	40272344	40272991	.
chr13	40504133	40504468	.
chr13	42106053	42106475	.
chr13	42134276	42134539	.
chr13	44188194	44188635	.
chr13	44231943	44232291	.
chr13	44815688	44815954	.
chr13	44932607	44933080	.
chr13	45847644	45848174	.
chr13	45873574	45873841	.
chr13	46804445	46804856	.
chr13	48009225	48009573	.
chr13	48892285	48892637	.
chr13	49313626	49314269	.
chr13	49625453	49625670	.
chr13	49638150	49638598	.
chr13	50411297	50411665	.
chr13	51618778	51618964	.
chr13	51643251	51643481	.
chr13	52785782	52786099	.
chr13	52980837	52981235	.
chr13	53010580	53010946	.
chr13	59086201	59086425	.
chr13	60402135	60402326	.
chr13	60572342	60572726	.
chr13	62643012	62643299	.
chr13	64723750	64724119	.
chr13	67299125	67299965	.
chr13	68190820	68191173	.
chr13	72180676	72180886	.
chr13	73158982	73159199	.
chr13	73421185	73421867	.
chr13	74047581	74048349	.
chr13	74443791	74444296	.
chr13	74730971	74731195	.
chr13	75359374	75359555	.
chr13	75365680	75366085	.
chr13	75771930	75772126	.
chr13	76723670	76724037	.
chr13	76852772	76853785	.
chr13	76937466	76937783	.
chr13	79435590	79435887	.
chr13	79485089	79485427	.
chr13	79724281	79724733	.
chr13	79936276	79936979	.
chr13	79987365	79987657	.
chr13	89514574	89515126	.
chr13	90272428	90272633	.
chr13	90444998	90445925	.
chr13	90613517	90613960	.
chr13	90696386	90696821	.
chr13	90717488	90717934	.
chr13	93170002	93170454	.
chr13	93559787	93560145	.
chr13	95128093	95128520	.
chr13	95256059	95256501	.
chr13	95505328	95505525	.
chr13	97122516	97122867	.
chr13	97141689	97141872	.
chr13	97257968	97258650	.
chr13	97282847	97283208	.
chr13	97307878	97308629	.
chr13	97367548	97367765	.
chr13	98508648	98508951	.
chr13	98776113	98776301	.
chr13	99908273	99908560	.
chr13	100132131	100132695	.
chr13	100392819	100393066	.
chr13	100633588	100633801	.
chr13	100668456	100668853	.
chr13	100875493	100876022	.
chr13	101018878	101019479	.
chr13	101258203	101258571	.
chr13	102707534	102707776	.
chr13	103282656	103283395	.
chr13	103471740	103472249	.
chr13	106151144	106151752	.
chr13	106472054	106472482	.
chr13	106617333	106618181	.
chr13	106649520	106649941	.
chr13	108957676	108957923	.
chr13	109840300	109840808	.
chr13	110012141	110012465	.
chr13	110094624	110095020	.
chr13	110126416	110126754	.
chr13	110870245	110870420	.
chr13	110965160	110965633	.
chr13	112711594	112712178	.
chr14	20400838	20401529	.
chr14	22614274	22614658	.
chr14	25007158	25007542	.
chr14	26842002	26842414	.
chr14	31038675	31038895	.
chr14	31070390	31070868	.
chr14	31243911	31244395	.
chr14	31263571	31264185	.
chr14	31881004	31881527	.
chr14	32342006	32342514	.
chr14	32417957	32418390	.
chr14	32525081	32525297	.
chr14	32561666	32561855	.
chr14	34035768	34036186	.
chr14	34081568	34081969	.
chr14	34139978	34140333	.
chr14	35341697	35341893	.
chr14	35365283	35365809	.
chr14	36091159	36091426	.
chr14	36478804	36479303	.
chr14	37122166	37122621	.
chr14	39033360	39033646	.
chr14	39218306	39218706	.
chr14	39492325	39492639	.
chr14	42192807	42193485	.
chr14	43687806	43688150	.
chr14	44316821	44317162	.
chr14	47300903	47301276	.
chr14	49505390	49505912	.
chr14	49512330	49512531	.
chr14	51539644	51539945	.
chr14	53391613	53391877	.
chr14	54251824	54252569	.
chr14	54253680	54253973	.
chr14	54650332	54650615	.
chr14	55127521	55127855	.
chr14	55448129	55448536	.
chr14	55557319	55557641	.
chr14	55699147	55699614	.
chr14	55806999	55807702	.
chr14	57833223	57833636	.
chr14	57930267	57930699	.
chr14	58104757	58105164	.
chr14	58133841	58134072	.
chr14	58171208	58171387	.
chr14	58749230	58749488	.
chr14	58913011	58913276	.
chr14	59098438	59098807	.
chr14	59358165	59358437	.
chr14	60565246	60565636	.
chr14	60777949	60778218	.
chr14	61178583	61178850	.
chr14	61355941	61356250	.
chr14	61420295	61420591	.
chr14	61524197	61524727	.
chr14	61564575	61564917	.
chr14	63174768	63175216	.
chr14	63178709	63179286	.
chr14	63438033	63438557	.
chr14	64074955	64075174	.
chr14	65356489	65356677	.
chr14	65791846	65792548	.
chr14	67187303	67188096	.
chr14	68940102	68940320	.
chr14	70755091	70755578	.
chr14	71240947	71241540	.
chr14	72463350	72463715	.
chr14	72801399	72802033	.
chr14	75648195	75648672	.
chr14	75711820	75712236	.
chr14	77123579	77123843	.
chr14	77303112	77303933	.
chr14	77989075	77989263	.
chr14	78135452	78135767	.
chr14	78383044	78383399	.
chr14	78752922	78753169	.
chr14	79045343	79045613	.
chr14	80388855	80389328	.
chr14	80425703	80426059	.
chr14	80568131	80568450	.
chr14	81137388	81137615	.
chr14	81303287	81303617	.
chr14	81324097	81324467	.
chr14	81400274	81401215	.
chr14	82855967	82856407	.
chr14	85251972	85252250	.
chr14	85414928	85415634	.
chr14	87869803	87870264	.
chr14	87877891	87878176	.
chr14	89507238	89508206	.
chr14	90419309	90419509	.
chr14	90846597	90846826	.
chr14	91119907	91120271	.
chr14	92503935	92504362	.
chr14	93043448	93043751	.
chr14	93959496	93959870	.
chr14	94575899	94576239	.
chr14	94599238	94599530	.
chr14	95265411	95265886	.
chr14	95796790	95797580	.
chr14	97771562	97771977	.
chr14	98069923	98070218	.
chr14	98906400	98906755	.
chr14	98909315	98909824	.
chr14	99036007	99036238	.
chr14	99612759	99613138	.
chr15	20261829	20262270	.
chr15	23570609	23570872	.
chr15	26449368	26449732	.
chr15	27025630	27025909	.
chr15	31471779	31472249	.
chr15	33201917	33202177	.
chr15	33242171	33242840	.
chr15	33860838	33861038	.
chr15	35696710	35696966	.
chr15	35713759	35714094	.
chr15	36428143	36428556	.
chr15	36831624	36831913	.
chr15	37824801	37825063	.
chr15	39128170	39128554	.
chr15	40338599	40339156	.
chr15	40379902	40380109	.
chr15	43911168	43911640	.
chr15	45061407	45061658	.
chr15	45641956	45642547	.
chr15	45855846	45856642	.
chr15	45919870	45920163	.
chr15	48373690	48374236	.
chr15	49627468	49627850	.
chr15	51121202	51121486	.
chr15	51726434	51726732	.
chr15	51907531	51907894	.
chr15	52496631	52497095	.
chr15	53071958	53072516	.
chr15	53910301	53910545	.
chr15	55907864	55908119	.
chr15	57485942	57486145	.
chr15	58332145	58332546	.
chr15	58469689	58470205	.
chr15	59553934	59554239	.
chr15	60932607	60932836	.
chr15	62112990	62113243	.
chr15	62135638	62135928	.
chr15	62742554	62743190	.
chr15	65057252	65057487	.
chr15	65939835	65940034	.
chr15	66472543	66472953	.
chr15	66883422	66883924	.
chr15	67105396	67105691	.
chr15	67107011	67107210	.
chr15	69557400	69557709	.
chr15	69794793	69795217	.
chr15	69853631	69853876	.
chr15	70770897	70771080	.
chr15	73388529	73388773	.
chr15	73956793	73957082	.
chr15	79640224	79640553	.
chr15	80033148	80033776	.
chr15	81297254	81297772	.
chr15	82146972	82147157	.
chr15	84912086	84912600	.
chr15	84929887	84930300	.
chr15	85030312	85030629	.
chr15	85357755	85358337	.
chr15	85800570	85800768	.
chr15	85878962	85880029	.
chr15	87764952	87765176	.
chr15	87973971	87974177	.
chr15	88115547	88115829	.
chr15	88648936	88649607	.
chr15	88659678	88659888	.
chr15	90165653	90166138	.
chr15	91965856	91966319	.
chr15	92011702	92012246	.
chr15	92429433	92429792	.
chr15	92803741	92804514	.
chr15	92921890	92922071	.
chr15	93173534	93173730	.
chr15	93286557	93286833	.
chr15	96026354	96026773	.
chr15	96428775	96429105	.
chr15	98154878	98155101	.
chr15	98896978	98897201	.
chr15	98983428	98983693	.
chr15	99123560	99124299	.
chr15	99536739	99536998	.
chr15	100043147	100043354	.
chr15	100713401	100713789	.
chr15	100721837	100722443	.
chr16	4882549	4883046	.
chr16	5216131	5216872	.
chr16	9047595	9048125	.
chr16	10341885	10342271	.
chr16	11017058	11017280	.
chr16	15899719	15899934	.
chr16	16022133	16022360	.
chr16	16144513	16144779	.
chr16	18998786	18999009	.
chr16	19393719	19394024	.
chr16	24526098	24526567	.
chr16	24669424	24669749	.
chr16	25481770	25482027	.
chr16	27222970	27223261	.
chr16	35134645	35135231	.
chr16	35565821	35566076	.
chr16	35733488	35733984	.
chr16	48014825	48015085	.
chr16	48122959	48123421	.
chr16	48964093	48964688	.
chr16	50397195	50397404	.
chr16	50474075	50474484	.
chr16	52497189	52497687	.
chr16	52864576	52864848	.
chr16	53099633	53100157	.
chr16	54446594	54446928	.
chr16	54657462	54657636	.
chr16	57341418	57341909	.
chr16	58365959	58366767	.
chr16	58409484	58409836	.
chr16	58452055	58452238	.
chr16	62805218	62805658	.
chr16	66382398	66383544	.
chr16	66486645	66487117	.
chr16	66508274	66508573	.
chr16	66522187	66522413	.
chr16	66618488	66618862	.
chr16	67311712	67312076	.
chr16	70428152	70428400	.
chr16	70748150	70748470	.
chr16	71360473	71360684	.
chr16	71473807	71474180	.
chr16	72291363	72292017	.
chr16	74449020	74449342	.
chr16	75245283	75245676	.
chr16	75305324	75305898	.
chr16	75483261	75483515	.
chr16	75565016	75565378	.
chr16	77213723	77214123	.
chr16	77298448	77299056	.
chr16	78211807	78212242	.
chr16	79658203	79658979	.
chr16	80027134	80027454	.
chr16	80938078	80938574	.
chr16	80993236	80993607	.
chr16	81143983	81144404	.
chr16	81846207	81846394	.
chr16	84014263	84014608	.
chr16	84532311	84532607	.
chr16	85878978	85879214	.
chr16	89842722	89843016	.
chr17	1115247	1115587	.
chr17	2407024	2407339	.
chr17	2960324	2960557	.
chr17	10086013	10086611	.
chr17	12231021	12231519	.
chr17	12730957	12731336	.
chr17	13561527	13562315	.
chr17	14206009	14206195	.
chr17	15348085	15348285	.
chr17	15398367	15398818	.
chr17	15490762	15490969	.
chr17	15651483	15651985	.
chr17	15959232	15959406	.
chr17	16286041	16286681	.
chr17	17028112	17028468	.
chr17	21299965	21300226	.
chr17	27384241	27384613	.
chr17	33871718	33872051	.
chr17	34252265	34252987	.
chr17	34254698	34254900	.
chr17	34291891	34292198	.
chr17	43014648	43015551	.
chr17	45093017	45093346	.
chr17	50062546	50062753	.
chr17	50064753	50064968	.
chr17	50638893	50639546	.
chr17	51397670	51398195	.
chr17	51703419	51704116	.
chr17	52027641	52027929	.
chr17	53722578	53722755	.
chr17	54948299	54948733	.
chr17	55162232	55162510	.
chr17	55286959	55287608	.
chr17	55433232	55433564	.
chr17	55478997	55479307	.
chr17	56681592	56682101	.
chr17	56699174	56699805	.
chr17	56915522	56916113	.
chr17	61294849	61295092	.
chr17	61337846	61338164	.
chr17	62093392	62093764	.
chr17	64230533	64231143	.
chr17	65106611	65107301	.
chr17	66509251	66509736	.
chr17	66951922	66952681	.
chr17	67421973	67422605	.
chr17	68089964	68090180	.
chr17	68318399	68318640	.
chr17	69492543	69492736	.
chr17	69539652	69540384	.
chr17	69608786	69609720	.
chr17	71071933	71072275	.
chr17	72151336	72152271	.
chr17	72338992	72339640	.
chr17	72362029	72362979	.
chr17	72407546	72407938	.
chr17	72411217	72411481	.
chr17	72421256	72421597	.
chr17	72456029	72456319	.
chr17	72465460	72465884	.
chr17	73291420	73291764	.
chr17	73340204	73340409	.
chr17	74116168	74116441	.
chr17	77255198	77255640	.
chr17	77323165	77323339	.
chr18	421606	422043	.
chr18	700384	700561	.
chr18	3710829	3711144	.
chr18	3794530	3795041	.
chr18	6994958	6995299	.
chr18	8891007	8891375	.
chr18	11500336	11500735	.
chr18	11859933	11860288	.
chr18	13710465	13710921	.
chr18	22032417	22032745	.
chr18	23106622	23107081	.
chr18	23115763	23115961	.
chr18	23785117	23785393	.
chr18	23822615	23822916	.
chr18	24212963	24213180	.
chr18	24560457	24560992	.
chr18	24567193	24567518	.
chr18	24732097	24732318	.
chr18	26617115	26617449	.
chr18	29154816	29155287	.
chr18	31454182	31454494	.
chr18	32302059	32302246	.
chr18	32383121	32383412	.
chr18	32921384	32921718	.
chr18	34978510	34979473	.
chr18	35513304	35513875	.
chr18	35703196	35703637	.
chr18	36309541	36310154	.
chr18	36711858	36712111	.
chr18	37299572	37299803	.
chr18	37419370	37419607	.
chr18	39414297	39414496	.
chr18	39946716	39947005	.
chr18	41940517	41940925	.
chr18	42975355	42975562	.
chr18	44715240	44715443	.
chr18	45617374	45617866	.
chr18	45780668	45780913	.
chr18	45802613	45803353	.
chr18	46152537	46153218	.
chr18	47323264	47323500	.
chr18	48264137	48264442	.
chr18	49021592	49021955	.
chr18	49609488	49609784	.
chr18	49849573	49849983	.
chr18	50081080	50081468	.
chr18	50097752	50098076	.
chr18	50240068	50240425	.
chr18	50659190	50659897	.
chr18	51150188	51150543	.
chr18	51236245	51236502	.
chr18	51617313	51617497	.
chr18	52160743	52161044	.
chr18	54023438	54023708	.
chr18	54100931	54101186	.
chr18	54148726	54149542	.
chr18	54388774	54389169	.
chr18	54776300	54776641	.
chr18	56890641	56890914	.
chr18	57210438	57211008	.
chr18	57235720	57235932	.
chr18	57397530	57397845	.
chr18	57813332	57813590	.
chr18	58118026	58118285	.
chr18	58541798	58542274	.
chr18	58785105	58785765	.
chr18	59516258	59516676	.
chr18	62450864	62451415	.
chr18	62486378	62486735	.
chr18	63161831	63162087	.
chr18	63882662	63883092	.
chr18	67525367	67525752	.
chr18	70044723	70044979	.
chr18	70280680	70280902	.
chr18	70333819	70334020	.
chr18	70384305	70384745	.
chr18	70421961	70422201	.
chr18	73688893	73689422	.
chr18	74316899	74317304	.
chr18	74806218	74806971	.
chr18	75408983	75409293	.
chr18	75923133	75923568	.
chr18	76459916	76460206	.
chr18	77101415	77101840	.
chr18	77127923	77128385	.
chr18	77129238	77129417	.
chr18	80010303	80010515	.
chr19	2168932	2169308	.
chr19	2627533	2627854	.
chr19	3451021	3451531	.
chr19	3537518	3537837	.
chr19	9075436	9075857	.
chr19	18419078	18419424	.
chr19	23310748	23311138	.
chr19	23312563	23312809	.
chr19	23460436	23460974	.
chr19	23957679	23957990	.
chr19	24054219	24054775	.
chr19	24192724	24193388	.
chr19	27733553	27734258	.
chr19	27859806	27860177	.
chr19	27860394	27860761	.
chr19	27866035	27866511	.
chr19	27971133	27971403	.
chr19	28289554	28289944	.
chr19	29099144	29099475	.
chr19	29805430	29805776	.
chr19	32322574	32322947	.
chr19	32343586	32343839	.
chr19	32373584	32374040	.
chr19	35319055	35319430	.
chr19	35405358	35405654	.
chr19	38300695	38301063	.
chr19	38683484	38684555	.
chr19	40921256	40921527	.
chr19	44626084	44626541	.
chr19	46222025	46222280	.
chr19	56384009	56384372	.
chr2	524507	524757	.
chr2	1544530	1544893	.
chr2	1593768	1594133	.
chr2	1653143	1653654	.
chr2	1869834	1870545	.
chr2	2527214	2527443	.
chr2	2743243	2743667	.
chr2	6877526	6878166	.
chr2	7180697	7181137	.
chr2	7191970	7192259	.
chr2	8091069	8091346	.
chr2	8592783	8593078	.
chr2	8803939	8804302	.
chr2	9071080	9071416	.
chr2	9234786	9235178	.
chr2	9287720	9288157	.
chr2	9703418	9703909	.
chr2	10936241	10936453	.
chr2	11676033	11676236	.
chr2	11697296	11697837	.
chr2	11710198	11710566	.
chr2	11744124	11744301	.
chr2	11863578	11864334	.
chr2	12155651	12156040	.
chr2	12588280	12588514	.
chr2	15154427	15154830	.
chr2	15169602	15170070	.
chr2	15674042	15674925	.
chr2	15730534	15730812	.
chr2	15912283	15912511	.
chr2	16425645	16426151	.
chr2	16633626	16634108	.
chr2	17620361	17620793	.
chr2	17643118	17643464	.
chr2	18299358	18300343	.
chr2	18362628	18363068	.
chr2	19538451	19538925	.
chr2	19611843	19612381	.
chr2	19664729	19665049	.
chr2	19711580	19711999	.
chr2	19801422	19802004	.
chr2	20066111	20066561	.
chr2	20141381	20141728	.
chr2	20231670	20231953	.
chr2	20496239	20496598	.
chr2	20584250	20584880	.
chr2	20618039	20618280	.
chr2	20930503	20931631	.
chr2	21256008	21256273	.
chr2	23135696	23136013	.
chr2	23280537	23280750	.
chr2	23283687	23284097	.
chr2	23425436	23426147	.
chr2	23480988	23481201	.
chr2	23595641	23596260	.
chr2	23651302	23651544	.
chr2	23757739	23757947	.
chr2	25078504	25078812	.
chr2	26018092	26018349	.
chr2	27706325	27706554	.
chr2	27799291	27799816	.
chr2	28508310	28508852	.
chr2	28640043	28640257	.
chr2	28976530	28976831	.
chr2	29113192	29114227	.
chr2	29281493	29282064	.
chr2	30293510	30293760	.
chr2	32926923	32927128	.
chr2	33015435	33015674	.
chr2	33069892	33070252	.
chr2	33291372	33291598	.
chr2	34049862	34050067	.
chr2	34104736	34105495	.
chr2	36338598	36339022	.
chr2	36486671	36486927	.
chr2	36649854	36650332	.
chr2	36889833	36890281	.
chr2	36930827	36931208	.
chr2	37916496	37917127	.
chr2	39523530	39524125	.
chr2	39571312	39571695	.
chr2	39584499	39584821	.
chr2	39631492	39632163	.
chr2	39642250	39642773	.
chr2	40434951	40435345	.
chr2	42342548	42342910	.
chr2	43293885	43294078	.
chr2	43519470	43520216	.
chr2	44918247	44918756	.
chr2	45184811	45185039	.
chr2	45238240	45238459	.
chr2	45435345	45435526	.
chr2	45964270	45964532	.
chr2	46224842	46225214	.
chr2	46653587	46653955	.
chr2	47034247	47034749	.
chr2	47043553	47043822	.
chr2	47069624	47070102	.
chr2	47269759	47270076	.
chr2	48693796	48694644	.
chr2	51103238	51103694	.
chr2	53403917	53404315	.
chr2	53505934	53506151	.
chr2	54520810	54521148	.
chr2	54572159	54572549	.
chr2	54767826	54768305	.
chr2	54903967	54904518	.
chr2	55779804	55780207	.
chr2	55992517	55993023	.
chr2	57373547	57373979	.
chr2	58112490	58113121	.
chr2	61620613	61621261	.
chr2	62178651	62178919	.
chr2	62287781	62288216	.
chr2	62293621	62294014	.
chr2	63614752	63615313	.
chr2	63712811	63713247	.
chr2	64291305	64291498	.
chr2	64359932	64360346	.
chr2	64807436	64807621	.
chr2	65070206	65070650	.
chr2	65454101	65454281	.
chr2	65662732	65663027	.
chr2	65754016	65754371	.
chr2	66509437	66509864	.
chr2	67259658	67260163	.
chr2	67463878	67464203	.
chr2	67561575	67561874	.
chr2	67917534	67917955	.
chr2	67974773	67975630	.
chr2	67997396	67997900	.
chr2	68908435	68908799	.
chr2	68918563	68918811	.
chr2	68971642	68972134	.
chr2	69046165	69046643	.
chr2	69298323	69298559	.
chr2	70524294	70524600	.
chr2	71831240	71831476	.
chr2	71880922	71881150	.
chr2	72115475	72115866	.
chr2	72263675	72264285	.
chr2	73089674	73089929	.
chr2	73685876	73686363	.
chr2	74712769	74712983	.
chr2	74740767	74741404	.
chr2	75523543	75523920	.
chr2	75605926	75606504	.
chr2	76257914	76258529	.
chr2	81658231	81658573	.
chr2	84297211	84297578	.
chr2	84919505	84920335	.
chr2	84946220	84946879	.
chr2	84958156	84958759	.
chr2	85499104	85499327	.
chr2	85662935	85663250	.
chr2	86114497	86114682	.
chr2	86383956	86384229	.
chr2	86704533	86705042	.
chr2	88330134	88330576	.
chr2	88540427	88540690	.
chr2	88600058	88600416	.
chr2	94262603	94262991	.
chr2	96427871	96428162	.
chr2	96556886	96557151	.
chr2	98869446	98869661	.
chr2	100291123	100291395	.
chr2	101396252	101396570	.
chr2	102514181	102514838	.
chr2	102932535	102932792	.
chr2	105403845	105404560	.
chr2	105409887	105410689	.
chr2	105455340	105456021	.
chr2	105712589	105713384	.
chr2	105919323	105920054	.
chr2	105977342	105977635	.
chr2	106057376	106057673	.
chr2	106115292	106115578	.
chr2	106147248	106147520	.
chr2	106566162	106566339	.
chr2	108413224	108413554	.
chr2	110101223	110101699	.
chr2	110869344	110869732	.
chr2	111659499	111660015	.
chr2	111698938	111699316	.
chr2	112692531	112692980	.
chr2	113240561	113241332	.
chr2	113283864	113284305	.
chr2	113811754	113812025	.
chr2	113818456	113818852	.
chr2	113878086	113878337	.
chr2	114022290	114022910	.
chr2	115122672	115123167	.
chr2	117856507	117857047	.
chr2	117945249	117945667	.
chr2	117980825	117981173	.
chr2	118123520	118124520	.
chr2	118668228	118669258	.
chr2	119208849	119209054	.
chr2	119252837	119253529	.
chr2	119492058	119492399	.
chr2	120703489	120703887	.
chr2	120791949	120792305	.
chr2	120934877	120935097	.
chr2	121185763	121186078	.
chr2	121483102	121483306	.
chr2	121790310	121790937	.
chr2	121860454	121860779	.
chr2	122100373	122100711	.
chr2	122203615	122203866	.
chr2	127000908	127001274	.
chr2	127064676	127065168	.
chr2	128347916	128348464	.
chr2	128362991	128363183	.
chr2	128563274	128563684	.
chr2	129017127	129017514	.
chr2	129191386	129191674	.
chr2	129192996	129193296	.
chr2	133818094	133818406	.
chr2	134177370	134177885	.
chr2	134739849	134740243	.
chr2	135664757	135665161	.
chr2	136235897	136236567	.
chr2	138395743	138396332	.
chr2	138596432	138596978	.
chr2	138615297	138615616	.
chr2	138644954	138645233	.
chr2	143557742	143557958	.
chr2	144358031	144358235	.
chr2	144427152	144427462	.
chr2	144659763	144659992	.
chr2	146634391	146635122	.
chr2	147588136	147588507	.
chr2	148253735	148254152	.
chr2	149648297	149648936	.
chr2	152543019	152543420	.
chr2	152694123	152694619	.
chr2	153059670	153059961	.
chr2	153386547	153386886	.
chr2	155842113	155842550	.
chr2	155879961	155880949	.
chr2	156455254	156455849	.
chr2	157246219	157247186	.
chr2	157692815	157693108	.
chr2	157784490	157784752	.
chr2	157831282	157832135	.
chr2	158011049	158011879	.
chr2	158529431	158530161	.
chr2	158667406	158667976	.
chr2	158724540	158725254	.
chr2	158926618	158926921	.
chr2	158990485	158990793	.
chr2	159030977	159031398	.
chr2	159202612	159203082	.
chr2	159637992	159638505	.
chr2	160205455	160205826	.
chr2	160208081	160208404	.
chr2	160214558	160214965	.
chr2	160221793	160222040	.
chr2	160317348	160317881	.
chr2	160397009	160397858	.
chr2	161123136	161123727	.
chr2	164388445	164388877	.
chr2	164542649	164543193	.
chr2	164617518	164617717	.
chr2	164967817	164968057	.
chr2	166410997	166411833	.
chr2	167140621	167141009	.
chr2	167509579	167510099	.
chr2	167576836	167577115	.
chr2	168545597	168545950	.
chr2	168816535	168816891	.
chr2	169011914	169012610	.
chr2	169095578	169096006	.
chr2	172441902	172442576	.
chr2	172693098	172693360	.
chr2	172783079	172783352	.
chr2	173048940	173049540	.
chr2	173590347	173590746	.
chr2	173652815	173653025	.
chr2	174264104	174264457	.
chr2	177338183	177338442	.
chr2	177397598	177397783	.
chr2	177429867	177430463	.
chr2	177998144	177998425	.
chr2	178279268	178279470	.
chr2	179106346	179107203	.
chr2	179981143	179981355	.
chr2	180012659	180012985	.
chr2	180707873	180708109	.
chr2	180728995	180729438	.
chr2	181036991	181037470	.
chr2	181203445	181203725	.
chr2	181791050	181791629	.
chr2	181876681	181876922	.
chr2	182915413	182916066	.
chr2	183315293	183315868	.
chr2	183316428	183316604	.
chr2	183740141	183740585	.
chr2	185583101	185584064	.
chr2	186532918	186533936	.
chr2	186957125	186957513	.
chr2	188199786	188200070	.
chr2	188303499	188303994	.
chr2	188629370	188630018	.
chr2	189528399	189528910	.
chr2	189534939	189535183	.
chr2	190469011	190469472	.
chr2	190469906	190470116	.
chr2	190718851	190719119	.
chr2	191219477	191219820	.
chr2	191486814	191487233	.
chr2	191612215	191612907	.
chr2	191620241	191620580	.
chr2	191635516	191636462	.
chr2	191689423	191689782	.
chr2	195614012	195614211	.
chr2	195623010	195623261	.
chr2	196292234	196292657	.
chr2	196601488	196601677	.
chr2	197185133	197185497	.
chr2	199229059	199229796	.
chr2	199278082	199278390	.
chr2	199303696	199304201	.
chr2	200336887	200337822	.
chr2	200405665	200406222	.
chr2	200662752	200663115	.
chr2	200944539	200945166	.
chr2	203403869	203404212	.
chr2	203759128	203759948	.
chr2	204452350	204452913	.
chr2	204491593	204491868	.
chr2	204665018	204665621	.
chr2	205025176	205025474	.
chr2	205650468	205650712	.
chr2	205746387	205746607	.
chr2	205754976	205755241	.
chr2	207258455	207258879	.
chr2	207334476	207335163	.
chr2	207394743	207395351	.
chr2	207683729	207684285	.
chr2	207847737	207848147	.
chr2	208369685	208370025	.
chr2	209368327	209369531	.
chr2	209495461	209496930	.
chr2	210584952	210585158	.
chr2	210955670	210955904	.
chr2	211408207	211408873	.
chr2	212646854	212647183	.
chr2	212905546	212906144	.
chr2	213995452	213995934	.
chr2	214019242	214019839	.
chr2	214069357	214069591	.
chr2	215830464	215830777	.
chr2	216373618	216373824	.
chr2	216775242	216775455	.
chr2	217105774	217106085	.
chr2	217331569	217331844	.
chr2	217653313	217653664	.
chr2	218717400	218717665	.
chr2	219249609	219249892	.
chr2	219274102	219274847	.
chr2	219362654	219362969	.
chr2	221779672	221780522	.
chr2	222518601	222519332	.
chr2	222787915	222788426	.
chr2	222959347	222960151	.
chr2	223760914	223761388	.
chr2	223797046	223797344	.
chr2	223846603	223847047	.
chr2	224221609	224221931	.
chr2	224268542	224268801	.
chr2	224485326	224485677	.
chr2	226673419	226673785	.
chr2	226963636	226963986	.
chr2	227183719	227184204	.
chr2	227414824	227415120	.
chr2	227818149	227819018	.
chr2	227853210	227854281	.
chr2	227862959	227863547	.
chr2	227876049	227876807	.
chr2	228023605	228023797	.
chr2	229407245	229407567	.
chr2	229673541	229673998	.
chr2	231212423	231212791	.
chr2	231642756	231642998	.
chr2	232988486	232988709	.
chr2	233974676	233974867	.
chr2	234823804	234824113	.
chr2	236770080	236770564	.
chr2	239007061	239007310	.
chr20	4135427	4135837	.
chr20	4713462	4713833	.
chr20	5073285	5073526	.
chr20	6591167	6591782	.
chr20	6698132	6698335	.
chr20	6708102	6708627	.
chr20	9051585	9051844	.
chr20	10540649	10541490	.
chr20	10619511	10620001	.
chr20	11267268	11267644	.
chr20	13029853	13030422	.
chr20	13800749	13801057	.
chr20	13839459	13839756	.
chr20	16580219	16580432	.
chr20	18197644	18197971	.
chr20	18657515	18658135	.
chr20	19976935	19977533	.
chr20	21666112	21666295	.
chr20	22390267	22390490	.
chr20	24672707	24673186	.
chr20	25136726	25137136	.
chr20	25223166	25223536	.
chr20	25237925	25238165	.
chr20	25309313	25310931	.
chr20	31712730	31713196	.
chr20	31987833	31988204	.
chr20	33893435	33893859	.
chr20	34390809	34391284	.
chr20	34525940	34526310	.
chr20	51366338	51366698	.
chr20	52649898	52650082	.
chr20	52923150	52923652	.
chr20	54067622	54067960	.
chr20	54123555	54123977	.
chr20	54267432	54267840	.
chr20	57698326	57698580	.
chr20	60249458	60249695	.
chr20	63682549	63682771	.
chr21	15224438	15224721	.
chr21	15422790	15423056	.
chr21	15706808	15707039	.
chr21	17688977	17689460	.
chr21	17848355	17848578	.
chr21	18493533	18493779	.
chr21	24045828	24046220	.
chr21	25369975	25370609	.
chr21	25838930	25839126	.
chr21	26140141	26140588	.
chr21	26390056	26390511	.
chr21	28636973	28637376	.
chr21	29114772	29115088	.
chr21	29130251	29130876	.
chr21	31219148	31219464	.
chr21	31294203	31294481	.
chr21	31354400	31355248	.
chr21	31630246	31630468	.
chr21	32524298	32524610	.
chr21	33287052	33287407	.
chr21	33947627	33948223	.
chr21	36430094	36430493	.
chr21	37338686	37339227	.
chr21	41634350	41634595	.
chr21	42097943	42098159	.
chr21	45228270	45228591	.
chr22	16902032	16902352	.
chr22	17576431	17576762	.
chr22	24894545	24894907	.
chr22	25120033	25120475	.
chr22	25747490	25747775	.
chr22	26471560	26471786	.
chr22	27475074	27475311	.
chr22	28116450	28116650	.
chr22	29621807	29622469	.
chr22	32050796	32051223	.
chr22	32987605	32987802	.
chr22	33074002	33074396	.
chr22	37752581	37752825	.
chr22	38985119	38985360	.
chr22	40498566	40498850	.
chr22	46829598	46829971	.
chr22	47129987	47130262	.
chr3	912829	913539	.
chr3	3038603	3038881	.
chr3	3700141	3700676	.
chr3	4474859	4475161	.
chr3	5013337	5013677	.
chr3	5023302	5023576	.
chr3	7015687	7015933	.
chr3	8483350	8483747	.
chr3	8629551	8629825	.
chr3	8740130	8740434	.
chr3	8793328	8793528	.
chr3	8837199	8837478	.
chr3	8869745	8870301	.
chr3	8936971	8937546	.
chr3	10757353	10757954	.
chr3	11185714	11185955	.
chr3	11548774	11549001	.
chr3	11591398	11591697	.
chr3	12193500	12193769	.
chr3	12763359	12763556	.
chr3	13218162	13218689	.
chr3	13850219	13850507	.
chr3	14329520	14329768	.
chr3	15387131	15387783	.
chr3	15443875	15444235	.
chr3	15768983	15769173	.
chr3	16060386	16060687	.
chr3	16102975	16103151	.
chr3	17013095	17013423	.
chr3	17039207	17039955	.
chr3	17833753	17834228	.
chr3	18099065	18099689	.
chr3	18295047	18295692	.
chr3	19757781	19758428	.
chr3	19889200	19889753	.
chr3	20054532	20054911	.
chr3	20574860	20575462	.
chr3	23549385	23549731	.
chr3	23567987	23568269	.
chr3	23629471	23629776	.
chr3	23668112	23668868	.
chr3	23685709	23686223	.
chr3	23740675	23741440	.
chr3	23959146	23959618	.
chr3	24220914	24221494	.
chr3	24239004	24239193	.
chr3	24242299	24242609	.
chr3	24254737	24255120	.
chr3	24591681	24592209	.
chr3	24688657	24689052	.
chr3	25493400	25494157	.
chr3	25582224	25582606	.
chr3	25820398	25821125	.
chr3	27311499	27311674	.
chr3	27533836	27534142	.
chr3	27535962	27536183	.
chr3	27552881	27553260	.
[truncated: 2,023 more rows]

## Sheet: B. ATAC-Fra1 Motifs BIN67
chr1	4395374	4395873
chr1	5611952	5612451
chr1	5611991	5612490
chr1	5612086	5612585
chr1	5612234	5612733
chr1	5978827	5979326
chr1	6076023	6076522
chr1	6224965	6225464
chr1	6603045	6603544
chr1	7299511	7300010
chr1	7401955	7402454
chr1	7401973	7402472
chr1	7402204	7402703
chr1	7471125	7471624
chr1	8525676	8526175
chr1	8525783	8526282
chr1	8670687	8671186
chr1	9547103	9547602
chr1	9766757	9767256
chr1	9766894	9767393
chr1	10474947	10475446
chr1	10891297	10891796
chr1	11693283	11693782
chr1	11805571	11806070
chr1	11805901	11806400
chr1	12124922	12125421
chr1	12480935	12481434
chr1	12810762	12811261
chr1	12811048	12811547
chr1	12851831	12852330
chr1	12852099	12852598
chr1	14346357	14346856
chr1	14742419	14742918
chr1	14742517	14743016
chr1	15028389	15028888
chr1	15272683	15273182
chr1	15800295	15800794
chr1	16605344	16605843
chr1	16727578	16728077
chr1	17237247	17237746
chr1	19011183	19011682
chr1	19949237	19949736
chr1	19949248	19949747
chr1	20211656	20212155
chr1	20282035	20282534
chr1	20411403	20411902
chr1	20614059	20614558
chr1	21022437	21022936
chr1	21022468	21022967
chr1	21324629	21325128
chr1	21324664	21325163
chr1	21638767	21639266
chr1	21638828	21639327
chr1	22025946	22026445
chr1	22704687	22705186
chr1	22832198	22832697
chr1	22832238	22832737
chr1	23960219	23960718
chr1	24266589	24267088
chr1	24683895	24684394
chr1	25892634	25893133
chr1	26070511	26071010
chr1	26531285	26531784
chr1	26677622	26678121
chr1	26771923	26772422
chr1	26800035	26800534
chr1	26849506	26850005
chr1	26907721	26908220
chr1	26907823	26908322
chr1	26921388	26921887
chr1	27542623	27543122
chr1	27542640	27543139
chr1	28129305	28129804
chr1	28129386	28129885
chr1	28437994	28438493
chr1	28517194	28517693
chr1	28517848	28518347
chr1	29202974	29203473
chr1	29570125	29570624
chr1	29570220	29570719
chr1	29974406	29974905
chr1	29974474	29974973
chr1	30059126	30059625
chr1	30527911	30528410
chr1	31010315	31010814
chr1	31010815	31011314
chr1	31170990	31171489
chr1	32236281	32236780
chr1	32448979	32449478
chr1	32501243	32501742
chr1	34200082	34200581
chr1	34200138	34200637
chr1	34200149	34200648
chr1	34763674	34764173
chr1	34852760	34853259
chr1	35505984	35506483
chr1	36135011	36135510
chr1	36149485	36149984
chr1	36149904	36150403
chr1	36150970	36151469
chr1	36188473	36188972
chr1	36300122	36300621
chr1	36300280	36300779
chr1	37499299	37499798
chr1	38589107	38589606
chr1	38859894	38860393
chr1	39142779	39143278
chr1	39159422	39159921
chr1	39192250	39192749
chr1	39192312	39192811
chr1	39398750	39399249
chr1	39466592	39467091
chr1	39605988	39606487
chr1	39606014	39606513
chr1	40032479	40032978
chr1	40774710	40775209
chr1	40967655	40968154
chr1	41109776	41110275
chr1	41432836	41433335
chr1	41955719	41956218
chr1	41955846	41956345
chr1	42371129	42371628
chr1	42371302	42371801
chr1	42530051	42530550
chr1	42530064	42530563
chr1	43582438	43582937
chr1	44327819	44328318
chr1	44327910	44328409
chr1	44532271	44532770
chr1	44532318	44532817
chr1	44707301	44707800
chr1	44707362	44707861
chr1	45802900	45803399
chr1	46223753	46224252
chr1	46528061	46528560
chr1	46725232	46725731
chr1	47263136	47263635
chr1	47280324	47280823
chr1	47425165	47425664
chr1	47569974	47570473
chr1	47697301	47697800
chr1	47871978	47872477
chr1	47894854	47895353
chr1	48026443	48026942
chr1	48094057	48094556
chr1	48570117	48570616
chr1	48878564	48879063
chr1	48878627	48879126
chr1	48931592	48932091
chr1	48931788	48932287
chr1	50181434	50181933
chr1	50181475	50181974
chr1	50603831	50604330
chr1	50621210	50621709
chr1	50873265	50873764
chr1	50873820	50874319
chr1	51063263	51063762
chr1	51261438	51261937
chr1	51331413	51331912
chr1	51558382	51558881
chr1	51558565	51559064
chr1	51558706	51559205
chr1	51569940	51570439
chr1	51569955	51570454
chr1	51637310	51637809
chr1	53601664	53602163
chr1	54227439	54227938
chr1	54229821	54230320
chr1	55022149	55022648
chr1	55429170	55429669
chr1	55429479	55429978
chr1	55573330	55573829
chr1	56363218	56363717
chr1	56473514	56474013
chr1	56473774	56474273
chr1	56676855	56677354
chr1	56676937	56677436
chr1	56688655	56689154
chr1	56688631	56689130
chr1	57658672	57659171
chr1	58163037	58163536
chr1	58308330	58308829
chr1	58397636	58398135
chr1	58412424	58412923
chr1	58573935	58574434
chr1	58584746	58585245
chr1	58618542	58619041
chr1	58727572	58728071
chr1	58755511	58756010
chr1	58755724	58756223
chr1	58762934	58763433
chr1	58777563	58778062
chr1	58816321	58816820
chr1	58848997	58849496
chr1	58849119	58849618
chr1	58849357	58849856
chr1	59128541	59129040
chr1	59143362	59143861
chr1	59151216	59151715
chr1	59151269	59151768
chr1	59731073	59731572
chr1	59976829	59977328
chr1	60425494	60425993
chr1	60503179	60503678
chr1	60573904	60574403
chr1	60822263	60822762
chr1	60822409	60822908
chr1	60952071	60952570
chr1	60972931	60973430
chr1	61244331	61244830
chr1	61318974	61319473
chr1	61388844	61389343
chr1	61453564	61454063
chr1	62230881	62231380
chr1	62321639	62322138
chr1	62321675	62322174
chr1	62622187	62622686
chr1	63674611	63675110
chr1	63746380	63746879
chr1	63920546	63921045
chr1	63921052	63921551
chr1	64006890	64007389
chr1	64263646	64264145
chr1	64269450	64269949
chr1	64343571	64344070
chr1	64343608	64344107
chr1	64623990	64624489
chr1	64898143	64898642
chr1	64898243	64898742
chr1	64898390	64898889
chr1	64898544	64899043
chr1	65254989	65255488
chr1	65261054	65261553
chr1	65261070	65261569
chr1	65396206	65396705
chr1	65425850	65426349
chr1	65677920	65678419
chr1	65706411	65706910
chr1	66543677	66544176
chr1	66642250	66642749
chr1	66726007	66726506
chr1	66944793	66945292
chr1	67060891	67061390
chr1	67060962	67061461
chr1	67348156	67348655
chr1	67404492	67404991
chr1	67552466	67552965
chr1	67559415	67559914
chr1	67570594	67571093
chr1	67626673	67627172
chr1	67626780	67627279
chr1	67646853	67647352
chr1	67708762	67709261
chr1	67708862	67709361
chr1	67736122	67736621
chr1	67749901	67750400
chr1	67750001	67750500
chr1	67771200	67771699
chr1	67850829	67851328
chr1	67890119	67890618
chr1	68257023	68257522
chr1	68307734	68308233
chr1	68331251	68331750
chr1	68378494	68378993
chr1	68384508	68385007
chr1	68384556	68385055
chr1	68384581	68385080
chr1	68384790	68385289
chr1	68443390	68443889
chr1	68974002	68974501
chr1	68974028	68974527
chr1	68994268	68994767
chr1	70221745	70222244
chr1	70257048	70257547
chr1	70459978	70460477
chr1	70487129	70487628
chr1	70487412	70487911
chr1	70510159	70510658
chr1	70779714	70780213
chr1	70779837	70780336
chr1	71086516	71087015
chr1	71086598	71087097
chr1	71086651	71087150
chr1	74246496	74246995
chr1	74653027	74653526
chr1	74693714	74694213
chr1	75084269	75084768
chr1	75203778	75204277
chr1	75673009	75673508
chr1	75874579	75875078
chr1	75874601	75875100
chr1	76331244	76331743
chr1	76949730	76950229
chr1	77039927	77040426
chr1	77056767	77057266
chr1	77322199	77322698
chr1	77322290	77322789
chr1	77322441	77322940
chr1	77412644	77413143
chr1	77473914	77474413
chr1	77514967	77515466
chr1	77539936	77540435
chr1	78280119	78280618
chr1	78841141	78841640
chr1	79045415	79045914
chr1	80054296	80054795
chr1	80064717	80065216
chr1	80445252	80445751
chr1	80995135	80995634
chr1	81175008	81175507
chr1	81179463	81179962
chr1	81179519	81180018
chr1	81582952	81583451
chr1	81681807	81682306
chr1	81703092	81703591
chr1	81707181	81707680
chr1	81707244	81707743
chr1	81877295	81877794
chr1	82447106	82447605
chr1	82485900	82486399
chr1	82565371	82565870
chr1	82565759	82566258
chr1	82656598	82657097
chr1	82657226	82657725
chr1	82657565	82658064
chr1	82801382	82801881
chr1	82831365	82831864
chr1	82838220	82838719
chr1	82919955	82920454
chr1	82920544	82921043
chr1	82920608	82921107
chr1	82995515	82996014
chr1	82996106	82996605
chr1	83053666	83054165
chr1	84089647	84090146
chr1	84103537	84104036
chr1	84174448	84174947
chr1	84254073	84254572
chr1	84365554	84366053
chr1	84365669	84366168
chr1	84365799	84366298
chr1	84365815	84366314
chr1	84698839	84699338
chr1	84834515	84835014
chr1	84834622	84835121
chr1	84854474	84854973
chr1	84854549	84855048
chr1	84923503	84924002
chr1	85329101	85329600
chr1	85451644	85452143
chr1	85569333	85569832
chr1	85607509	85608008
chr1	86255408	86255907
chr1	86422082	86422581
chr1	86516605	86517104
chr1	86773803	86774302
chr1	86781165	86781664
chr1	87140975	87141474
chr1	87224346	87224845
chr1	87398814	87399313
chr1	87398887	87399386
chr1	87399464	87399963
chr1	87473371	87473870
chr1	87473521	87474020
chr1	87590879	87591378
chr1	87645094	87645593
chr1	87712516	87713015
chr1	87795483	87795982
chr1	87909855	87910354
chr1	87927817	87928316
chr1	88773720	88774219
chr1	88774287	88774786
chr1	88774449	88774948
chr1	88985004	88985503
chr1	88985808	88986307
chr1	89465588	89466087
chr1	89739414	89739913
chr1	89808564	89809063
chr1	89953399	89953898
chr1	89975321	89975820
chr1	90210883	90211382
chr1	90211006	90211505
chr1	90387224	90387723
chr1	90403299	90403798
chr1	91092575	91093074
chr1	91099979	91100478
chr1	91121588	91122087
chr1	91282897	91283396
chr1	91569915	91570414
chr1	91609770	91610269
chr1	91650861	91651360
chr1	91651021	91651520
chr1	93304842	93305341
chr1	93454092	93454591
chr1	93454115	93454614
chr1	93693106	93693605
chr1	93701797	93702296
chr1	93754565	93755064
chr1	93878593	93879092
chr1	94068388	94068887
chr1	94270890	94271389
chr1	94270950	94271449
chr1	94300399	94300898
chr1	94325738	94326237
chr1	94326014	94326513
chr1	94579991	94580490
chr1	94855104	94855603
chr1	95198097	95198596
chr1	96362762	96363261
chr1	96362786	96363285
chr1	97094507	97095006
chr1	97193114	97193613
chr1	97384427	97384926
chr1	97384627	97385126
chr1	97384794	97385293
chr1	98086882	98087381
chr1	98086956	98087455
chr1	98264180	98264679
chr1	98316495	98316994
chr1	98324058	98324557
chr1	98388663	98389162
chr1	98794414	98794913
chr1	98963550	98964049
chr1	100313582	100314081
chr1	100597258	100597757
chr1	100622229	100622728
chr1	100799777	100800276
chr1	100860548	100861047
chr1	101166936	101167435
chr1	101182213	101182712
chr1	101371345	101371844
chr1	101371427	101371926
chr1	101618851	101619350
chr1	102861420	102861919
chr1	102906482	102906981
chr1	102918726	102919225
chr1	102920187	102920686
chr1	102949763	102950262
chr1	103002224	103002723
chr1	103028313	103028812
chr1	103038364	103038863
chr1	103065056	103065555
chr1	103083790	103084289
chr1	103084294	103084793
chr1	103085018	103085517
chr1	103160451	103160950
chr1	103180729	103181228
chr1	103191520	103192019
chr1	103221414	103221913
chr1	103265655	103266154
chr1	103275358	103275857
chr1	103362578	103363077
chr1	103438490	103438989
chr1	103439580	103440079
chr1	103458197	103458696
chr1	103459608	103460107
chr1	103516939	103517438
chr1	103992130	103992629
chr1	104195575	104196074
chr1	104195649	104196148
chr1	104329428	104329927
chr1	104648366	104648865
chr1	105664623	105665122
chr1	107142227	107142726
chr1	107936617	107937116
chr1	107990787	107991286
chr1	107990801	107991300
chr1	108009962	108010461
chr1	108199337	108199836
chr1	108504660	108505159
chr1	108720062	108720561
chr1	108720081	108720580
chr1	109197529	109198028
chr1	109197655	109198154
chr1	109808612	109809111
chr1	109934498	109934997
chr1	109934514	109935013
chr1	110004229	110004728
chr1	110917047	110917546
chr1	111223172	111223671
chr1	111592924	111593423
chr1	111851772	111852271
chr1	112251920	112252419
chr1	112935758	112936257
chr1	114218751	114219250
chr1	114320764	114321263
chr1	115062742	115063241
chr1	115133598	115134097
chr1	115523647	115524146
chr1	115782775	115783274
chr1	115783198	115783697
chr1	116509050	116509549
chr1	116509102	116509601
chr1	116596244	116596743
chr1	116958715	116959214
chr1	117068317	117068816
chr1	117077374	117077873
chr1	117077540	117078039
chr1	117821944	117822443
chr1	117826625	117827124
chr1	118305189	118305688
chr1	118948107	118948606
chr1	118963640	118964139
chr1	119279558	119280057
chr1	119279589	119280088
chr1	119364803	119365302
chr1	119373696	119374195
chr1	119374598	119375097
chr1	119384750	119385249
chr1	143709927	143710426
chr1	145751776	145752275
chr1	145892288	145892787
chr1	147292956	147293455
chr1	147534577	147535076
chr1	147771411	147771910
chr1	147781370	147781869
chr1	148264889	148265388
chr1	148371766	148372265
chr1	148371903	148372402
chr1	149996098	149996597
chr1	150050727	150051226
chr1	150569771	150570270
chr1	150778650	150779149
chr1	151311687	151312186
chr1	151311767	151312266
chr1	151314337	151314836
chr1	151342049	151342548
chr1	151444082	151444581
chr1	151491861	151492360
chr1	151941549	151942048
chr1	151973104	151973603
chr1	151989632	151990131
chr1	151989676	151990175
chr1	152183055	152183554
chr1	152229057	152229556
chr1	152906423	152906922
chr1	153072372	153072871
chr1	153100333	153100832
chr1	153100364	153100863
chr1	153231587	153232086
chr1	153566692	153567191
chr1	153566730	153567229
chr1	154000629	154001128
chr1	154305159	154305658
chr1	154305273	154305772
chr1	154507250	154507749
chr1	154586066	154586565
chr1	155001105	155001604
chr1	155167785	155168284
chr1	155763514	155764013
chr1	156114704	156115203
chr1	156123025	156123524
chr1	156123853	156124352
chr1	156130385	156130884
chr1	156660317	156660816
chr1	156689803	156690302
chr1	156823389	156823888
chr1	156896784	156897283
chr1	156897267	156897766
chr1	156946513	156947012
chr1	157253371	157253870
chr1	157390907	157391406
chr1	157862616	157863115
chr1	157961978	157962477
chr1	157962521	157963020
chr1	157969848	157970347
chr1	158102125	158102624
chr1	158787077	158787576
chr1	158961339	158961838
chr1	158993121	158993620
chr1	159009962	159010461
chr1	159091065	159091564
chr1	159161616	159162115
chr1	159261897	159262396
chr1	159493145	159493644
chr1	159881985	159882484
chr1	159882143	159882642
chr1	159898564	159899063
chr1	160124985	160125484
chr1	160206587	160207086
chr1	160838106	160838605
chr1	160855926	160856425
chr1	161083637	161084136
chr1	161139198	161139697
chr1	161389979	161390478
chr1	161524294	161524793
chr1	161524399	161524898
chr1	161530965	161531464
chr1	161539848	161540347
chr1	161792471	161792970
chr1	161792970	161793469
chr1	161910028	161910527
chr1	162397237	162397736
chr1	162539355	162539854
chr1	162605507	162606006
chr1	162605672	162606171
chr1	162663276	162663775
chr1	162678588	162679087
chr1	162873903	162874402
chr1	163035642	163036141
chr1	163035875	163036374
chr1	163036282	163036781
chr1	163072034	163072533
chr1	163083897	163084396
chr1	163090732	163091231
chr1	163171279	163171778
chr1	163190808	163191307
chr1	163234044	163234543
chr1	163244142	163244641
chr1	163346551	163347050
chr1	163875746	163876245
chr1	164613377	164613876
chr1	164637880	164638379
chr1	164772878	164773377
chr1	164794506	164795005
chr1	165036660	165037159
chr1	165116852	165117351
chr1	165116867	165117366
chr1	165116876	165117375
chr1	165116927	165117426
chr1	165383325	165383824
chr1	165482340	165482839
chr1	165520725	165521224
chr1	165539510	165540009
chr1	165632055	165632554
chr1	166207424	166207923
chr1	166423028	166423527
chr1	166756799	166757298
chr1	166815010	166815509
chr1	166906001	166906500
chr1	166952424	166952923
chr1	166952598	166953097
chr1	167199254	167199753
chr1	167306130	167306629
chr1	167796309	167796808
chr1	167797294	167797793
chr1	167882930	167883429
chr1	168113177	168113676
chr1	168301745	168302244
chr1	168321138	168321637
chr1	168321181	168321680
chr1	168628901	168629400
chr1	168629106	168629605
chr1	168710115	168710614
chr1	168710169	168710668
chr1	168719502	168720001
chr1	168719514	168720013
chr1	168743566	168744065
chr1	168893156	168893655
chr1	168893433	168893932
chr1	169004426	169004925
chr1	169312309	169312808
chr1	169312393	169312892
chr1	169858662	169859161
chr1	169999621	170000120
chr1	170361366	170361865
chr1	170418182	170418681
chr1	170519170	170519669
chr1	170563179	170563678
chr1	170563382	170563881
chr1	170713645	170714144
chr1	171665194	171665693
chr1	171817608	171818107
chr1	171817837	171818336
chr1	171817875	171818374
chr1	171877971	171878470
chr1	172168222	172168721
chr1	172254887	172255386
chr1	172255085	172255584
chr1	172269614	172270113
chr1	172294253	172294752
chr1	172322443	172322942
chr1	172343613	172344112
chr1	172343934	172344433
chr1	172358945	172359444
chr1	172467258	172467757
chr1	172499830	172500329
chr1	172589235	172589734
chr1	172639005	172639504
chr1	172874132	172874631
chr1	172909671	172910170
chr1	172918125	172918624
chr1	172980665	172981164
chr1	173062307	173062806
chr1	173162757	173163256
chr1	173202701	173203200
chr1	173425020	173425519
chr1	173507305	173507804
chr1	173584066	173584565
chr1	173640606	173641105
chr1	173953058	173953557
chr1	174218074	174218573
chr1	174402600	174403099
chr1	174728751	174729250
chr1	175029448	175029947
chr1	175155021	175155520
chr1	175169447	175169946
chr1	175169754	175170253
chr1	175197754	175198253
chr1	175520326	175520825
chr1	176119739	176120238
chr1	176241554	176242053
chr1	176241603	176242102
chr1	176466634	176467133
chr1	176515554	176516053
chr1	176517558	176518057
chr1	176517674	176518173
chr1	176720766	176721265
chr1	176830028	176830527
chr1	176993985	176994484
chr1	177157047	177157546
chr1	177209419	177209918
chr1	177228848	177229347
chr1	177255515	177256014
chr1	177255536	177256035
chr1	177425391	177425890
chr1	177451547	177452046
chr1	177589842	177590341
chr1	177642156	177642655
chr1	177648124	177648623
chr1	177780473	177780972
chr1	177848840	177849339
chr1	177873464	177873963
chr1	177927192	177927691
chr1	177960172	177960671
chr1	178126909	178127408
chr1	178144100	178144599
chr1	178152011	178152510
chr1	178192980	178193479
chr1	178202581	178203080
chr1	178238925	178239424
chr1	178299774	178300273
chr1	178344838	178345337
chr1	178345023	178345522
chr1	178374250	178374749
chr1	178417994	178418493
chr1	178418007	178418506
chr1	178418060	178418559
chr1	178418175	178418674
chr1	178470592	178471091
chr1	178530177	178530676
chr1	178536966	178537465
chr1	178537005	178537504
chr1	178537228	178537727
chr1	179143250	179143749
chr1	179164754	179165253
chr1	179169773	179170272
chr1	179564310	179564809
chr1	179605814	179606313
chr1	180168229	180168728
chr1	180572112	180572611
chr1	180572151	180572650
chr1	180586973	180587472
chr1	181078861	181079360
chr1	181112620	181113119
chr1	181123389	181123888
chr1	181251258	181251757
chr1	181255637	181256136
chr1	181255674	181256173
chr1	181298557	181299056
chr1	181459317	181459816
chr1	181479431	181479930
chr1	181532354	181532853
chr1	181532381	181532880
chr1	181744095	181744594
chr1	182065673	182066172
chr1	182186486	182186985
chr1	182186660	182187159
chr1	182290306	182290805
chr1	182744074	182744573
chr1	182962767	182963266
chr1	182969532	182970031
chr1	182974725	182975224
chr1	183029819	183030318
chr1	183029880	183030379
chr1	183044523	183045022
chr1	183060533	183061032
chr1	183060623	183061122
chr1	183148298	183148797
chr1	183163508	183164007
chr1	183234685	183235184
chr1	183234741	183235240
chr1	183272592	183273091
chr1	183272664	183273163
chr1	183279323	183279822
chr1	183411304	183411803
chr1	183515240	183515739
chr1	183623047	183623546
chr1	183871252	183871751
chr1	183916247	183916746
chr1	183927168	183927667
chr1	183966555	183967054
chr1	184002354	184002853
chr1	184296937	184297436
chr1	184595836	184596335
chr1	184838790	184839289
chr1	184838898	184839397
chr1	185017457	185017956
chr1	185366738	185367237
chr1	185374033	185374532
chr1	185484217	185484716
chr1	185484353	185484852
chr1	185500106	185500605
chr1	185621915	185622414
chr1	185719120	185719619
chr1	185846900	185847399
chr1	185864964	185865463
chr1	185864974	185865473
chr1	186032423	186032922
chr1	186115171	186115670
chr1	186155731	186156230
chr1	186178881	186179380
chr1	186188413	186188912
chr1	186188451	186188950
chr1	186237084	186237583
chr1	186237144	186237643
chr1	186425298	186425797
chr1	186425507	186426006
chr1	186440746	186441245
chr1	186593452	186593951
chr1	186643788	186644287
chr1	186643813	186644312
chr1	186783052	186783551
chr1	186918054	186918553
chr1	186935656	186936155
chr1	186967891	186968390
chr1	187014010	187014509
chr1	187027400	187027899
chr1	187027561	187028060
chr1	187299776	187300275
chr1	187539058	187539557
chr1	187544682	187545181
chr1	187691528	187692027
chr1	187691645	187692144
chr1	187691696	187692195
chr1	187879513	187880012
chr1	188027794	188028293
chr1	188027807	188028306
chr1	188237861	188238360
chr1	188489963	188490462
chr1	188517302	188517801
chr1	188568089	188568588
chr1	188595033	188595532
chr1	188689740	188690239
chr1	188706955	188707454
chr1	188707010	188707509
chr1	188825665	188826164
chr1	188938128	188938627
chr1	189094606	189095105
chr1	189150278	189150777
chr1	189156792	189157291
chr1	189475556	189476055
chr1	189543577	189544076
chr1	189619843	189620342
chr1	189619873	189620372
chr1	189715173	189715672
chr1	189907820	189908319
chr1	189962298	189962797
chr1	189962397	189962896
chr1	190275417	190275916
chr1	190368127	190368626
chr1	190383500	190383999
chr1	190405877	190406376
chr1	190843645	190844144
chr1	190849255	190849754
chr1	191188884	191189383
chr1	191330062	191330561
chr1	191498790	191499289
chr1	191608457	191608956
chr1	191641534	191642033
chr1	191641564	191642063
chr1	191641598	191642097
chr1	191763330	191763829
chr1	191774934	191775433
chr1	191789183	191789682
chr1	191789191	191789690
chr1	191871322	191871821
chr1	192052543	192053042
chr1	192354768	192355267
chr1	192410925	192411424
chr1	192439580	192440079
chr1	192439591	192440090
chr1	192492315	192492814
chr1	192531174	192531673
chr1	192531245	192531744
chr1	192546379	192546878
chr1	192551110	192551609
chr1	192749491	192749990
chr1	192766432	192766931
chr1	192827224	192827723
chr1	193070015	193070514
chr1	193115804	193116303
chr1	193115889	193116388
chr1	193156951	193157450
chr1	193325227	193325726
chr1	193326410	193326909
chr1	193404331	193404830
chr1	193404695	193405194
chr1	193417652	193418151
chr1	193524886	193525385
chr1	193524946	193525445
chr1	193543428	193543927
chr1	193558565	193559064
chr1	193655438	193655937
chr1	193789477	193789976
chr1	193864902	193865401
chr1	194044565	194045064
chr1	194053057	194053556
chr1	194062689	194063188
chr1	194161754	194162253
chr1	194474847	194475346
chr1	194496607	194497106
chr1	194658306	194658805
chr1	194809871	194810370
chr1	194917816	194918315
chr1	195097521	195098020
chr1	195532359	195532858
chr1	195618706	195619205
chr1	195733607	195734106
chr1	195763127	195763626
chr1	195764203	195764702
chr1	195981972	195982471
chr1	196036162	196036661
chr1	196432128	196432627
chr1	196511689	196512188
chr1	196511970	196512469
chr1	196537348	196537847
chr1	196570723	196571222
chr1	196650693	196651192
chr1	196955622	196956121
chr1	196980437	196980936
chr1	197179132	197179631
chr1	197179340	197179839
chr1	197210644	197211143
chr1	197312337	197312836
chr1	197336091	197336590
chr1	197383329	197383828
chr1	197825515	197826014
chr1	197864974	197865473
chr1	197989566	197990065
chr1	198018756	198019255
chr1	198019307	198019806
chr1	198024991	198025490
chr1	198121248	198121747
chr1	198220621	198221120
chr1	198443431	198443930
chr1	198443592	198444091
chr1	198669239	198669738
chr1	198699507	198700006
chr1	199190032	199190531
chr1	199272778	199273277
chr1	199685588	199686087
chr1	199685603	199686102
chr1	199759657	199760156
chr1	200076437	200076936
chr1	200099236	200099735
chr1	200131760	200132259
chr1	200180958	200181457
chr1	200379651	200380150
chr1	200542323	200542822
chr1	200734036	200734535
chr1	200795366	200795865
chr1	201185167	201185666
chr1	201245389	201245888
chr1	201275462	201275961
chr1	201461299	201461798
chr1	201714796	201715295
chr1	201714849	201715348
chr1	201730614	201731113
chr1	201849874	201850373
chr1	201885751	201886250
chr1	202235994	202236493
chr1	202236039	202236538
chr1	202292481	202292980
chr1	202589055	202589554
chr1	203039894	203040393
chr1	203504892	203505391
chr1	203558559	203559058
chr1	203756608	203757107
chr1	203756693	203757192
chr1	204726319	204726818
chr1	204763891	204764390
chr1	204867536	204868035
chr1	205284858	205285357
chr1	205368058	205368557
chr1	205374918	205375417
chr1	205374927	205375426
chr1	205600339	205600838
chr1	205711473	205711972
chr1	205983980	205984479
chr1	206001579	206002078
chr1	206021861	206022360
chr1	206106607	206107106
chr1	206801628	206802127
chr1	207040217	207040716
chr1	207051477	207051976
chr1	207172758	207173257
chr1	207173170	207173669
chr1	207244543	207245042
chr1	207304805	207305304
chr1	207304838	207305337
chr1	207305071	207305570
chr1	207337277	207337776
chr1	207393780	207394279
chr1	207797480	207797979
chr1	207797584	207798083
chr1	208008240	208008739
chr1	208108011	208108510
chr1	208184494	208184993
chr1	208201403	208201902
chr1	208201488	208201987
chr1	208203501	208204000
chr1	208216297	208216796
chr1	208402625	208403124
chr1	208462196	208462695
chr1	208985033	208985532
chr1	209140248	209140747
chr1	209190372	209190871
chr1	209207812	209208311
chr1	209248594	209249093
chr1	209296574	209297073
chr1	209410069	209410568
chr1	209542812	209543311
chr1	209542904	209543403
chr1	209607413	209607912
chr1	209607611	209608110
chr1	209627708	209628207
chr1	209627791	209628290
chr1	209747897	209748396
chr1	209808227	209808726
chr1	209840046	209840545
chr1	209840067	209840566
chr1	209840245	209840744
chr1	209879817	209880316
chr1	209884820	209885319
chr1	209884847	209885346
chr1	209900973	209901472
chr1	209956620	209957119
chr1	209988864	209989363
chr1	210025558	210026057
chr1	210288485	210288984
chr1	210374085	210374584
chr1	210374484	210374983
chr1	210407603	210408102
chr1	210597956	210598455
chr1	210598339	210598838
chr1	210687793	210688292
chr1	210794686	210795185
chr1	210817657	210818156
chr1	210882992	210883491
chr1	210883978	210884477
chr1	210884905	210885404
chr1	211036576	211037075
chr1	211037203	211037702
chr1	211037212	211037711
chr1	211037229	211037728
chr1	211117069	211117568
chr1	211305330	211305829
chr1	211371499	211371998
chr1	211514090	211514589
chr1	211515462	211515961
chr1	211592370	211592869
chr1	212179896	212180395
chr1	212234792	212235291
chr1	212261124	212261623
chr1	212261269	212261768
chr1	212486107	212486606
chr1	212513241	212513740
chr1	212596351	212596850
chr1	212596512	212597011
chr1	212630331	212630830
chr1	212656155	212656654
chr1	212721724	212722223
chr1	212783036	212783535
chr1	213123730	213124229
chr1	213374732	213375231
chr1	213474140	213474639
chr1	213597627	213598126
chr1	213648428	213648927
chr1	213779339	213779838
chr1	213779458	213779957
chr1	213803673	213804172
chr1	213840735	213841234
chr1	214049912	214050411
chr1	214049958	214050457
chr1	214209223	214209722
chr1	214212869	214213368
chr1	214213226	214213725
chr1	214213258	214213757
chr1	214213339	214213838
chr1	214296996	214297495
chr1	214329040	214329539
chr1	214404995	214405494
chr1	214446812	214447311
chr1	214447137	214447636
chr1	214471710	214472209
chr1	214558215	214558714
chr1	214584385	214584884
chr1	214585284	214585783
chr1	214901954	214902453
chr1	214933564	214934063
chr1	215113956	215114455
chr1	215114278	215114777
chr1	215282790	215283289
chr1	215390715	215391214
chr1	215458225	215458724
chr1	215458233	215458732
chr1	215517579	215518078
chr1	215631750	215632249
chr1	216075527	216076026
chr1	216279822	216280321
chr1	216561815	216562314
chr1	216700985	216701484
chr1	216701001	216701500
chr1	217078709	217079208
chr1	217363566	217364065
chr1	217507012	217507511
chr1	217507043	217507542
chr1	217660423	217660922
chr1	217660522	217661021
chr1	217660557	217661056
chr1	217954121	217954620
chr1	218200660	218201159
chr1	218201223	218201722
chr1	218209589	218210088
chr1	218210217	218210716
chr1	218377441	218377940
chr1	218377549	218378048
chr1	218437246	218437745
chr1	218460112	218460611
chr1	218585665	218586164
chr1	218706240	218706739
chr1	218823751	218824250
chr1	219027275	219027774
chr1	219089154	219089653
chr1	219305036	219305535
chr1	219325210	219325709
chr1	219325233	219325732
chr1	219461330	219461829
chr1	219555478	219555977
chr1	219771180	219771679
chr1	219771268	219771767
chr1	219837474	219837973
chr1	219917949	219918448
chr1	219918086	219918585
chr1	220068028	220068527
chr1	220281340	220281839
chr1	220337507	220338006
chr1	220370550	220371049
chr1	220516335	220516834
chr1	220544946	220545445
chr1	220553061	220553560
chr1	220696879	220697378
chr1	220733151	220733650
chr1	220797713	220798212
chr1	220803676	220804175
chr1	221226882	221227381
chr1	221227320	221227819
chr1	221419793	221420292
chr1	221419909	221420408
chr1	221439551	221440050
chr1	221440137	221440636
chr1	221612644	221613143
chr1	221621062	221621561
chr1	221802131	221802630
chr1	221802343	221802842
chr1	221824135	221824634
chr1	221824291	221824790
chr1	221824371	221824870
chr1	221887272	221887771
chr1	221887348	221887847
chr1	221936379	221936878
chr1	221969695	221970194
chr1	221983631	221984130
chr1	221988062	221988561
chr1	221988075	221988574
chr1	222014823	222015322
chr1	222068019	222068518
chr1	222105505	222106004
chr1	222167378	222167877
chr1	222204649	222205148
chr1	222215831	222216330
chr1	222582356	222582855
chr1	222712195	222712694
chr1	222817655	222818154
chr1	222817774	222818273
chr1	222878002	222878501
chr1	223190177	223190676
chr1	223256234	223256733
chr1	223323684	223324183
chr1	223429572	223430071
chr1	223455471	223455970
chr1	223500618	223501117
chr1	223500669	223501168
chr1	223500756	223501255
chr1	223696758	223697257
chr1	223707358	223707857
chr1	223707386	223707885
chr1	223712508	223713007
chr1	223726857	223727356
chr1	223726882	223727381
chr1	223771944	223772443
chr1	223772239	223772738
chr1	224144489	224144988
chr1	224182813	224183312
chr1	224260241	224260740
chr1	224542967	224543466
chr1	224543027	224543526
chr1	224565272	224565771
chr1	224565377	224565876
chr1	224726916	224727415
chr1	224763065	224763564
chr1	224802168	224802667
chr1	225454383	225454882
chr1	225454947	225455446
chr1	225508663	225509162
chr1	225508712	225509211
chr1	225655603	225656102
chr1	225670562	225671061
chr1	225746994	225747493
chr1	225817845	225818344
chr1	226662927	226663426
chr1	227351463	227351962
chr1	227357335	227357834
chr1	227357573	227358072
chr1	227805810	227806309
chr1	227806035	227806534
chr1	227934803	227935302
chr1	227934835	227935334
chr1	227934918	227935417
chr1	227934950	227935449
chr1	227934982	227935481
chr1	227935014	227935513
chr1	227935044	227935543
chr1	227935076	227935575
chr1	227935107	227935606
chr1	227935139	227935638
chr1	228191859	228192358
chr1	228530063	228530562
chr1	228838613	228839112
chr1	228861312	228861811
chr1	228861374	228861873
chr1	229887609	229888108
chr1	230084727	230085226
chr1	230104846	230105345
chr1	230104937	230105436
chr1	230809344	230809843
chr1	231020318	231020817
chr1	231395872	231396371
chr1	231626550	231627049
chr1	232084785	232085284
chr1	232142658	232143157
chr1	232367510	232368009
chr1	232369848	232370347
chr1	232704966	232705465
chr1	232704982	232705481
chr1	232854296	232854795
chr1	233520716	233521215
chr1	233543861	233544360
chr1	233665945	233666444
chr1	233668991	233669490
chr1	233707605	233708104
chr1	233993881	233994380
chr1	233993914	233994413
chr1	234186138	234186637
chr1	234186266	234186765
chr1	234315402	234315901
chr1	234533285	234533784
chr1	234657393	234657892
chr1	234781830	234782329
chr1	234997350	234997849
chr1	234997530	234998029
chr1	235067753	235068252
chr1	235198452	235198951
chr1	235404351	235404850
chr1	235708863	235709362
chr1	235792594	235793093
chr1	235903192	235903691
chr1	235910787	235911286
chr1	235910840	235911339
chr1	235910859	235911358
chr1	235917639	235918138
chr1	235999604	236000103
chr1	235999623	236000122
chr1	236103660	236104159
chr1	236168950	236169449
chr1	236338254	236338753
chr1	236338315	236338814
chr1	236534365	236534864
chr1	236534488	236534987
chr1	236534570	236535069
chr1	236848367	236848866
chr1	236862706	236863205
chr1	237098663	237099162
chr1	237199233	237199732
chr1	237211248	237211747
chr1	237217253	237217752
chr1	237478146	237478645
chr1	237542636	237543135
chr1	237690877	237691376
chr1	237727698	237728197
chr1	237873582	237874081
chr1	237873683	237874182
chr1	237901591	237902090
chr1	238063649	238064148
chr1	238152347	238152846
chr1	238152523	238153022
chr1	238213246	238213745
chr1	238213436	238213935
chr1	238252707	238253206
chr1	238399919	238400418
chr1	238409340	238409839
chr1	238469287	238469786
chr1	238469529	238470028
chr1	238582980	238583479
chr1	238648045	238648544
chr1	238648443	238648942
chr1	238653836	238654335
chr1	238654193	238654692
chr1	239098602	239099101
chr1	239190193	239190692
chr1	239190314	239190813
chr1	239583280	239583779
chr1	239756206	239756705
chr1	239814397	239814896
chr1	239814714	239815213
chr1	239856178	239856677
chr1	239858280	239858779
chr1	240109336	240109835
chr1	240242713	240243212
chr1	240563643	240564142
chr1	240579644	240580143
chr1	240797201	240797700
chr1	241034845	241035344
chr1	241086901	241087400
chr1	241211184	241211683
chr1	241211334	241211833
chr1	241213345	241213844
chr1	241413567	241414066
chr1	241413659	241414158
chr1	241482997	241483496
chr1	241592375	241592874
chr1	241592402	241592901
chr1	241608864	241609363
chr1	241615684	241616183
chr1	241627622	241628121
chr1	241746063	241746562
chr1	241789118	241789617
chr1	241828852	241829351
chr1	241919107	241919606
chr1	242020191	242020690
chr1	242106452	242106951
chr1	242244790	242245289
chr1	242245017	242245516
chr1	242322275	242322774
chr1	242370030	242370529
chr1	242547064	242547563
chr1	242824506	242825005
chr1	242824569	242825068
chr1	243344370	243344869
chr1	243596012	243596511
chr1	243798851	243799350
chr1	243798876	243799375
chr1	243882454	243882953
chr1	243927077	243927576
chr1	244008334	244008833
chr1	244164185	244164684
chr1	244272883	244273382
chr1	244273651	244274150
chr1	244274003	244274502
chr1	244323159	244323658
chr1	244323169	244323668
chr1	244353922	244354421
chr1	244600062	244600561
chr1	245031216	245031715
chr1	245092037	245092536
chr1	245092104	245092603
chr1	245304811	245305310
chr1	245380386	245380885
chr1	245621754	245622253
chr1	245715409	245715908
chr1	245715568	245716067
chr1	245737804	245738303
chr1	245788496	245788995
chr1	245823206	245823705
chr1	245918666	245919165
chr1	246139890	246140389
chr1	246139944	246140443
chr1	246749109	246749608
chr1	246875488	246875987
chr1	247166704	247167203
chr1	247528932	247529431
chr1	247529336	247529835
chr1	247602832	247603331
chr1	247830295	247830794
chr1	247906665	247907164
chr1	247906708	247907207
chr1	247916280	247916779
chr1	248007081	248007580
chr1	248064623	248065122
chr1	248084880	248085379
chr1	248084938	248085437
chr1	248618867	248619366
chr1	248743554	248744053
chr1	248926652	248927151
chr1	248927020	248927519
chr1	248945538	248946037
chr10	683725	684224
chr10	683886	684385
chr10	872075	872574
chr10	1036421	1036920
chr10	1379994	1380493
chr10	1421099	1421598
chr10	1499692	1500191
chr10	1499774	1500273
chr10	1499839	1500338
chr10	1590905	1591404
chr10	1716020	1716519
chr10	1716120	1716619
chr10	2111973	2112472
chr10	2950079	2950578
chr10	3043949	3044448
chr10	3339791	3340290
chr10	3755142	3755641
chr10	3755261	3755760
chr10	3755707	3756206
chr10	3852490	3852989
chr10	3946066	3946565
chr10	3963484	3963983
chr10	4344707	4345206
chr10	4637900	4638399
chr10	4663278	4663777
chr10	4671788	4672287
chr10	4704363	4704862
chr10	4733724	4734223
chr10	4771526	4772025
chr10	4781010	4781509
chr10	4867808	4868307
chr10	5291922	5292421
chr10	5317772	5318271
chr10	5317802	5318301
chr10	5317866	5318365
chr10	5439542	5440041
chr10	5585101	5585600
chr10	6275380	6275879
chr10	6275484	6275983
chr10	6401694	6402193
chr10	6749135	6749634
chr10	8159935	8160434
chr10	8369810	8370309
chr10	10805432	10805931
chr10	10831312	10831811
chr10	10872033	10872532
chr10	11146555	11147054
chr10	11164938	11165437
chr10	11552306	11552805
chr10	11552318	11552817
chr10	13372090	13372589
chr10	13882215	13882714
chr10	13882388	13882887
chr10	14978825	14979324
chr10	15200745	15201244
chr10	15200957	15201456
chr10	16381264	16381763
chr10	16381375	16381874
chr10	16891659	16892158
chr10	16892008	16892507
chr10	17023628	17024127
chr10	17512674	17513173
chr10	17673971	17674470
chr10	17981939	17982438
chr10	18610688	18611187
chr10	18713237	18713736
chr10	18713311	18713810
chr10	18918696	18919195
chr10	20817396	20817895
chr10	21194879	21195378
chr10	21285813	21286312
chr10	21285820	21286319
chr10	21285843	21286342
chr10	21293097	21293596
chr10	21315565	21316064
chr10	21327769	21328268
chr10	21335145	21335644
chr10	21518493	21518992
chr10	21626650	21627149
chr10	21727523	21728022
chr10	22428028	22428527
chr10	22428120	22428619
chr10	22620836	22621335
chr10	22816583	22817082
chr10	22817129	22817628
chr10	22823235	22823734
chr10	22823364	22823863
chr10	23158154	23158653
chr10	23384725	23385224
chr10	24466471	24466970
chr10	24483943	24484442
chr10	24820721	24821220
chr10	24902141	24902640
chr10	24902320	24902819
chr10	24963161	24963660
chr10	25060212	25060711
chr10	25493155	25493654
chr10	25713733	25714232
chr10	26781228	26781727
chr10	26781248	26781747
chr10	27384098	27384597
chr10	28174926	28175425
chr10	29160224	29160723
chr10	29535432	29535931
chr10	29551172	29551671
chr10	29600108	29600607
chr10	29600220	29600719
chr10	29659133	29659632
chr10	29659195	29659694
chr10	29668754	29669253
chr10	29668870	29669369
chr10	29758050	29758549
chr10	29758114	29758613
chr10	29863167	29863666
chr10	29863240	29863739
chr10	31318410	31318909
chr10	32139512	32140011
chr10	32413597	32414096
chr10	32413663	32414162
chr10	32413795	32414294
chr10	32980657	32981156
chr10	33005487	33005986
chr10	33005772	33006271
chr10	33134247	33134746
chr10	33134270	33134769
chr10	33238174	33238673
chr10	35041176	35041675
chr10	35041443	35041942
chr10	35421690	35422189
chr10	35546961	35547460
chr10	36555329	36555828
chr10	36609104	36609603
chr10	36725738	36726237
chr10	36725992	36726491
chr10	36759225	36759724
chr10	36827302	36827801
chr10	37380148	37380647
chr10	37380181	37380680
chr10	37380278	37380777
chr10	37489171	37489670
chr10	42187718	42188217
chr10	42188011	42188510
chr10	42188137	42188636
chr10	42188193	42188692
chr10	43048730	43049229
chr10	43864024	43864523
chr10	44011163	44011662
chr10	44051712	44052211
chr10	44051929	44052428
chr10	44240910	44241409
chr10	44301161	44301660
chr10	44301449	44301948
chr10	44510951	44511450
chr10	44511008	44511507
chr10	44752991	44753490
chr10	44981377	44981876
chr10	44981658	44982157
chr10	45403187	45403686
chr10	47024903	47025402
chr10	47406916	47407415
chr10	47407011	47407510
chr10	48400436	48400935
chr10	49177599	49178098
chr10	49633125	49633624
chr10	50418477	50418976
chr10	50469508	50470007
chr10	50576638	50577137
chr10	50740501	50741000
chr10	50987428	50987927
chr10	51833107	51833606
chr10	51833158	51833657
chr10	51960728	51961227
chr10	52319234	52319733
chr10	52443510	52444009
chr10	52443745	52444244
chr10	52644545	52645044
chr10	52818201	52818700
chr10	53057519	53058018
chr10	53599046	53599545
chr10	53697201	53697700
chr10	53809165	53809664
chr10	55146228	55146727
chr10	55146354	55146853
chr10	55311948	55312447
chr10	55312067	55312566
chr10	55738306	55738805
chr10	55738754	55739253
chr10	56538162	56538661
chr10	56538173	56538672
chr10	57865049	57865548
chr10	57992914	57993413
chr10	58153120	58153619
chr10	58157498	58157997
chr10	58435441	58435940
chr10	58435587	58436086
chr10	59388108	59388607
chr10	59674443	59674942
chr10	59679010	59679509
chr10	59865188	59865687
chr10	59965537	59966036
chr10	59991867	59992366
chr10	60293274	60293773
chr10	60300696	60301195
chr10	60414928	60415427
chr10	60473641	60474140
chr10	60481350	60481849
chr10	60611556	60612055
chr10	60611635	60612134
chr10	61028835	61029334
chr10	61029265	61029764
chr10	61636184	61636683
chr10	61642886	61643385
chr10	61665186	61665685
chr10	61666315	61666814
chr10	61754425	61754924
chr10	61837358	61837857
chr10	62020271	62020770
chr10	62049297	62049796
chr10	62098817	62099316
chr10	62251003	62251502
chr10	62251052	62251551
chr10	62422112	62422611
chr10	62467755	62468254
chr10	62594175	62594674
chr10	62804329	62804828
chr10	62916579	62917078
chr10	62916589	62917088
chr10	62995543	62996042
chr10	63217483	63217982
chr10	63267556	63268055
chr10	63269339	63269838
chr10	63629672	63630171
chr10	63700270	63700769
chr10	63700428	63700927
chr10	63707440	63707939
chr10	63707495	63707994
chr10	63707511	63708010
chr10	64094259	64094758
chr10	65194336	65194835
chr10	65861377	65861876
chr10	65861463	65861962
chr10	67629861	67630360
chr10	68097353	68097852
chr10	68135988	68136487
chr10	68136023	68136522
chr10	68136076	68136575
chr10	68136313	68136812
chr10	68136334	68136833
chr10	68153730	68154229
chr10	68153862	68154361
chr10	69392881	69393380
chr10	69728447	69728946
chr10	69728588	69729087
chr10	69864600	69865099
chr10	71860580	71861079
chr10	71860623	71861122
chr10	72174028	72174527
chr10	72174163	72174662
chr10	72215855	72216354
chr10	73111526	73112025
chr10	73886296	73886795
chr10	73887485	73887984
chr10	73887927	73888426
chr10	73957398	73957897
chr10	73966369	73966868
chr10	74056288	74056787
chr10	74056726	74057225
chr10	74266166	74266665
chr10	74917690	74918189
chr10	75358944	75359443
chr10	75359194	75359693
chr10	75547452	75547951
chr10	75959426	75959925
chr10	76444380	76444879
chr10	77067696	77068195
chr10	77160812	77161311
chr10	77160901	77161400
chr10	77164157	77164656
chr10	77350876	77351375
chr10	77478439	77478938
chr10	77501533	77502032
chr10	77531590	77532089
chr10	77593140	77593639
chr10	77593165	77593664
chr10	77847076	77847575
chr10	77949378	77949877
chr10	78256245	78256744
chr10	78256291	78256790
chr10	78303279	78303778
chr10	79184360	79184859
chr10	79488492	79488991
chr10	80196422	80196921
chr10	80471867	80472366
chr10	80506533	80507032
chr10	80599517	80600016
chr10	80718182	80718681
chr10	81450697	81451196
chr10	82982260	82982759
chr10	82982292	82982791
chr10	82982478	82982977
chr10	83983876	83984375
chr10	84076235	84076734
chr10	84076632	84077131
chr10	84118860	84119359
chr10	84118888	84119387
chr10	84126575	84127074
chr10	84126603	84127102
chr10	84126631	84127130
chr10	84269812	84270311
chr10	84269971	84270470
chr10	84310614	84311113
chr10	84374757	84375256
chr10	84428114	84428613
chr10	84540728	84541227
chr10	84825486	84825985
chr10	85532961	85533460
chr10	85533028	85533527
chr10	85545169	85545668
chr10	85642559	85643058
chr10	85642890	85643389
chr10	85643172	85643671
chr10	85644018	85644517
chr10	85987004	85987503
chr10	86224905	86225404
chr10	86225264	86225763
chr10	86254626	86255125
chr10	86441333	86441832
chr10	86635647	86636146
chr10	86870868	86871367
chr10	87082315	87082814
chr10	87095398	87095897
chr10	87635917	87636416
chr10	88110488	88110987
chr10	88152981	88153480
chr10	88156481	88156980
chr10	88428726	88429225
chr10	88467877	88468376
chr10	88468293	88468792
chr10	88474755	88475254
chr10	88500233	88500732
chr10	88697214	88697713
chr10	88707797	88708296
chr10	88707886	88708385
chr10	88810816	88811315
chr10	89032281	89032780
chr10	89278326	89278825
chr10	89553445	89553944
chr10	89553535	89554034
chr10	89553593	89554092
chr10	89564111	89564610
chr10	89793719	89794218
chr10	90076187	90076686
chr10	90148688	90149187
chr10	90319677	90320176
chr10	90319688	90320187
chr10	90587390	90587889
chr10	90587451	90587950
chr10	90960507	90961006
chr10	90960609	90961108
chr10	90960762	90961261
chr10	90970296	90970795
chr10	91349668	91350167
chr10	91613803	91614302
chr10	91613820	91614319
chr10	91901960	91902459
chr10	91901973	91902472
chr10	92126168	92126667
chr10	92126307	92126806
chr10	92644672	92645171
chr10	92886461	92886960
chr10	92892548	92893047
chr10	92894267	92894766
chr10	93335081	93335580
chr10	93458972	93459471
chr10	93466508	93467007
chr10	93476010	93476509
chr10	93555335	93555834
chr10	94006764	94007263
chr10	94042207	94042706
chr10	94674269	94674768
chr10	95201947	95202446
chr10	95212101	95212600
chr10	95229893	95230392
chr10	95236228	95236727
chr10	95308939	95309438
chr10	97464139	97464638
chr10	97574862	97575361
chr10	97732055	97732554
chr10	97840341	97840840
chr10	97861540	97862039
chr10	97882573	97883072
chr10	97882614	97883113
chr10	97882713	97883212
chr10	98269555	98270054
chr10	98374364	98374863
chr10	98374754	98375253
chr10	98460970	98461469
chr10	98587326	98587825
chr10	99141279	99141778
chr10	99292390	99292889
chr10	99339059	99339558
chr10	99667273	99667772
chr10	99711326	99711825
chr10	100148783	100149282
chr10	100148877	100149376
chr10	100185611	100186110
chr10	100371461	100371960
chr10	100536090	100536589
chr10	101013017	101013516
chr10	101013094	101013593
chr10	101013379	101013878
chr10	101244852	101245351
chr10	101444022	101444521
chr10	102835045	102835544
chr10	103273074	103273573
chr10	103273134	103273633
chr10	103492129	103492628
chr10	103781501	103782000
chr10	103781539	103782038
chr10	103872384	103872883
chr10	103908438	103908937
chr10	103908481	103908980
chr10	104216409	104216908
chr10	104329534	104330033
chr10	104329973	104330472
chr10	104445514	104446013
chr10	104580580	104581079
chr10	104589659	104590158
chr10	104590046	104590545
chr10	104803122	104803621
chr10	104937724	104938223
chr10	109884667	109885166
chr10	109906160	109906659
chr10	110082198	110082697
chr10	110306294	110306793
chr10	110323651	110324150
chr10	110323781	110324280
chr10	110336327	110336826
chr10	110336393	110336892
chr10	110536398	110536897
chr10	110665154	110665653
chr10	110774286	110774785
chr10	110774316	110774815
chr10	110774388	110774887
chr10	110852432	110852931
chr10	111093948	111094447
chr10	111756998	111757497
chr10	111972301	111972800
chr10	112219118	112219617
chr10	112383503	112384002
chr10	112383593	112384092
chr10	112717144	112717643
chr10	112812032	112812531
chr10	112815727	112816226
chr10	112875646	112876145
chr10	112876016	112876515
chr10	112919928	112920427
chr10	113073794	113074293
chr10	113074081	113074580
chr10	113087467	113087966
chr10	113087552	113088051
chr10	113563473	113563972
chr10	114026645	114027144
chr10	114271788	114272287
chr10	114271930	114272429
chr10	114271965	114272464
chr10	114306825	114307324
chr10	114633426	114633925
chr10	115956385	115956884
chr10	116080714	116081213
chr10	116114050	116114549
chr10	116114103	116114602
chr10	116114143	116114642
chr10	116537044	116537543
chr10	116743276	116743775
chr10	116888720	116889219
chr10	116888955	116889454
chr10	116947298	116947797
chr10	116947320	116947819
chr10	117004467	117004966
chr10	117078315	117078814
chr10	117078408	117078907
chr10	117086728	117087227
chr10	117221333	117221832
chr10	117980382	117980881
chr10	117980488	117980987
chr10	118504729	118505228
chr10	118798406	118798905
chr10	119007129	119007628
chr10	119091109	119091608
chr10	119190531	119191030
chr10	119316953	119317452
chr10	119317024	119317523
chr10	119401972	119402471
chr10	119667935	119668434
chr10	119686761	119687260
chr10	119859950	119860449
chr10	120943146	120943645
chr10	121927405	121927904
chr10	122063373	122063872
chr10	122112745	122113244
chr10	123958709	123959208
chr10	125145421	125145920
chr10	125231710	125232209
chr10	125231743	125232242
chr10	125585129	125585628
chr10	126247580	126248079
chr10	126247625	126248124
chr10	126569991	126570490
chr10	126749099	126749598
chr10	127017588	127018087
chr10	128629477	128629976
chr10	128629524	128630023
chr10	128629601	128630100
chr10	131457447	131457946
chr10	131635762	131636261
chr10	131635801	131636300
chr10	131635839	131636338
chr10	131888369	131888868
chr10	132572128	132572627
chr11	762898	763397
chr11	3037260	3037759
chr11	3674345	3674844
chr11	3674366	3674865
chr11	3674394	3674893
chr11	3905176	3905675
chr11	5280751	5281250
chr11	5280761	5281260
chr11	5649528	5650027
chr11	5685161	5685660
chr11	5923270	5923769
chr11	6124647	6125146
chr11	6250013	6250512
chr11	6307999	6308498
chr11	6432093	6432592
chr11	6812462	6812961
chr11	6856169	6856668
chr11	7212902	7213401
chr11	7600522	7601021
chr11	7605636	7606135
chr11	8006548	8007047
chr11	8025340	8025839
chr11	8234230	8234729
chr11	8328982	8329481
chr11	8329061	8329560
chr11	8469570	8470069
chr11	8604327	8604826
chr11	8604500	8604999
chr11	8732954	8733453
chr11	8766887	8767386
chr11	9364388	9364887
chr11	9364528	9365027
chr11	9566153	9566652
chr11	9566163	9566662
chr11	9689356	9689855
chr11	9906059	9906558
chr11	10122875	10123374
chr11	10123028	10123527
chr11	10490677	10491176
chr11	10490763	10491262
chr11	10736254	10736753
chr11	10736377	10736876
chr11	10990795	10991294
chr11	11788116	11788615
chr11	12044199	12044698
chr11	12044585	12045084
chr11	12280899	12281398
chr11	12412198	12412697
chr11	12582252	12582751
chr11	12770146	12770645
chr11	13216211	13216710
chr11	13216563	13217062
chr11	13247230	13247729
chr11	13873463	13873962
chr11	13923770	13924269
chr11	14015791	14016290
chr11	14215402	14215901
chr11	14258306	14258805
chr11	14337252	14337751
chr11	14337301	14337800
chr11	14422500	14422999
chr11	14520149	14520648
chr11	14981048	14981547
chr11	15053339	15053838
chr11	15053557	15054056
chr11	15074895	15075394
chr11	15665509	15666008
chr11	15771016	15771515
chr11	15793213	15793712
chr11	15800235	15800734
chr11	16327144	16327643
chr11	16669970	16670469
chr11	16738577	16739076
[truncated: 12,277 more rows]
